# Supplementary material for: Unique proteome signature of post-chemotherapy ovarian cancer ascites-derived tumor cells
Source: PubMed Central journal article supplement (PMC4965858; doi:10.1038/srep30061), 2016-07-29
Supplement: srep30061-s1.pdf [file srep30061-s1.pdf]

## Supplementary Information

### Unique proteome signature of post-chemotherapy ovarian cancer ascites-derived tumor cells

*Nuzhat Ahmed*<sup>1,2,3,4\*</sup>, *David Greening*<sup>5\*</sup>, *Chantel Samardzija*<sup>3</sup>, *Ruth M Escalona*<sup>3,4</sup>, *Maoshan Chen*<sup>5</sup>, *Jock K Findlay*<sup>3,4</sup> and *George Kannourakis*<sup>1,2</sup>

<sup>1</sup>Fiona Elsey Cancer Research Institute, Ballarat, Victoria 3353, Australia,

<sup>2</sup>Federation University, Ballarat, Victoria 3010, Australia

<sup>3</sup>Department of Obstetrics and Gynaecology, University of Melbourne, Victoria 3052

<sup>4</sup>The Hudson Institute of Medical Research, Victoria 3168, Australia

<sup>5</sup>Department of Biochemistry and Genetics, La Trobe Institute for Molecular Science, La Trobe University, Bundoora, Victoria, 3086, Australia.

**Running title:** Proteomic profiling of ascites-derived tumor cells

**Key words:** ovarian carcinoma, tumor cells, ascites, chemoresistance, chemotherapy

\*Both authors contributed equally to the study

Corresponding author:

Nuzhat Ahmed, PhD

Fiona Elsey Cancer Research Institute

Suites 23-26, 106-110 Lydiard Street South

Ballarat Technology Central Park

Ballarat 3353, Australia

Email: nuzhata@unimelb.edu.au

**Figure S1.** Immuno-blot analysis of TOP2A, PYCR2, and PPL expression in tumour cell lysate samples

**A**

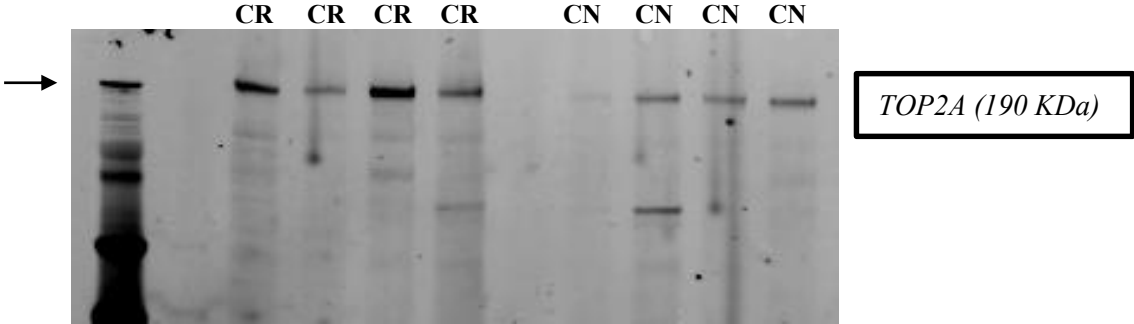

**B**

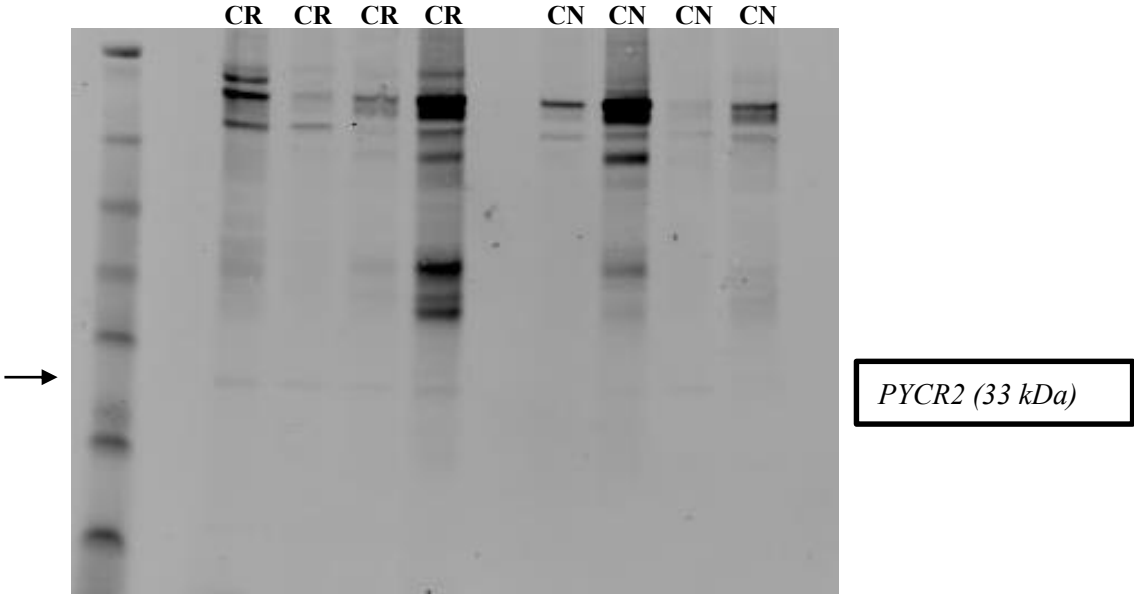

**C**

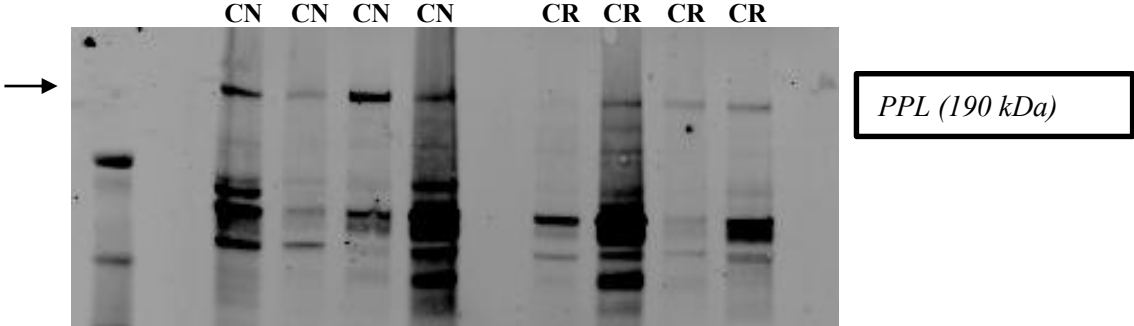

**Table S1.** Description of patients recruited in the study.

|                                  | Patient ID | Sample type | Diagnosis                                   | Silverberg Grade | FIGO Stage | Treatment                                                                                                                                                                                        | Age at diagnosis | Survival           | Survival Status |
|----------------------------------|------------|-------------|---------------------------------------------|------------------|------------|--------------------------------------------------------------------------------------------------------------------------------------------------------------------------------------------------|------------------|--------------------|-----------------|
| <b>Chemonaive</b>                | As59       | CN1         | Serous Cystadenocarcinoma NOS               | G3               | IIc        | None                                                                                                                                                                                             | 64               | 5 months           | Deceased        |
|                                  | As68       | CN2         | Serous Cystadenoma/ Early Serous Borderline | NA               | NA         | None                                                                                                                                                                                             | 64               | NA                 | NA              |
|                                  | As71       | CN3         | Serous Cystadenocarcinoma (Genital tract)   | NA               | III        | None                                                                                                                                                                                             | 65               | 2 years, 10 months | Alive           |
|                                  | As77       | CN4         | Carcinosarcoma NOS                          | G3               | NA         | None                                                                                                                                                                                             | 53               | 1 year, 5 months   | Deceased        |
| <b>Chemoreistant (Recurrent)</b> | As62       | CR1         | Adenocarcinoma NOS                          | Not graded       | IV         | Carboplatin and Paclitaxel 6 cycles                                                                                                                                                              | 67               | 2 years, 8 months  | Deceased        |
| <b>Chemoreistant (Recurrent)</b> | As69       | CR2         | Serous Cystadenocarcinoma NOS               | G3               | IIIc       | Carboplatin/Paclitaxel/Bevacizumab-VGEF Inhibitor (ICON7 Trial) 18 cycles                                                                                                                        | 55               | 5 years, 6 months  | Deceased        |
|                                  | As72       | CR3         | Papillary Serous Cystadenocarcinoma         | G3               | IIIc       | Carboplatin and Paclitaxel 6 cycles Gemcitabine and Cisplatin 1 cycle                                                                                                                            | 59               | 3 years, 2 months  | Deceased        |
|                                  | As73       | CR4         | Serous Cystadenocarcinoma NOS               | G3               | IIIc       | Carboplatin and Paclitaxel 6, AMG-386 182 Trial (Doxorubicin and AMG-386) 9 cycles, Paclitaxel 6 cycles, Cyclophosphamide 2 cycles, Topotecan 2 cycles, Doxorubicin Pegylated Liposomal 2 cycles | 53               | 3years, 1 month    | Deceased        |

\*NOS: Not otherwise stated

\*NA: Not available

**Table S2.** Raw dataset of proteins identified in CN and CR tumor cells.

| Gene symbol       | UniProt Entry <sup>A</sup> | Gene symbol <sup>A</sup> | Protein Accession <sup>n</sup> | Protein Description <sup>A</sup>                                                                                                                                             | Molecular Weight | %    | Combined_LL <sup>B</sup> | CN_Combined <sup>C</sup> | CR_Combined <sup>D</sup> | CN_1 | CN_2 | CN_3 | CN_4 | CR_1 | CR_2 | CR_3 | CR_4 | RSC (CR / CN) <sup>E</sup> | p value <sup>F</sup> |
|-------------------|----------------------------|--------------------------|--------------------------------|------------------------------------------------------------------------------------------------------------------------------------------------------------------------------|------------------|------|--------------------------|--------------------------|--------------------------|------|------|------|------|------|------|------|------|----------------------------|----------------------|
| PLEC_HUMAN        | GCSP_HUMAN                 | GLDC                     | P23378                         | Glycine dehydrogenase [decarboxylating], mitochondrial (EC 1.4.4.2) (Glycine cleavage system P protein) (Glycine decarboxylase)                                              | 113 kDa          | 0.48 | 21                       | 0                        | 21                       | 0    | 0    | 0    | 0    | 20   | 0    | 0    | 2    | 19.9350293                 | 95% (< 0.00010)      |
| GRP78_HUMAN       | GSTM3_HUMAN                | GSTM3                    | P21266                         | Glutathione S-transferase Mu 3 (EC 2.5.1.18) (GST class-mu 3) (GSTM3-3) (hGSTM3-3)                                                                                           | 27 kDa           | 0.59 | 20                       | 0                        | 21                       | 0    | 0    | 0    | 0    | 3    | 14   | 4    | 0    | 19.9350293                 | 95% (< 0.00010)      |
| H4_HUMAN          | B4DKU3_HUMAN               |                          | B4DKU3                         | cDNA FLJ53449, highly similar to rRNA methyltransferase 3 (EC 2.1.1.-)                                                                                                       | 83 kDa           | 0.59 | 16                       | 0                        | 16                       | 0    | 0    | 0    | 0    | 8    | 2    | 4    | 3    | 15.4541356                 | 95% (< 0.00010)      |
| H2B1D_HUMAN       | Q56FN6_HUMAN               | HLA-DRB1                 | Q56FN6                         | MHC class II antigen                                                                                                                                                         | 30 kDa           | 0.61 | 29                       | 0                        | 16                       | 0    | 0    | 0    | 0    | 0    | 9    | 0    | 0    | 15.4541356                 | 95% (< 0.00010)      |
| ANXA2_HUMAN       | ACACA_HUMAN                | ACACA                    | Q13085                         | Acetyl-CoA carboxylase 1 (ACC1) (EC 6.4.1.2) (ACC-alpha) [Includes: Biotin carboxylase (EC 6.3.4.14)]                                                                        | 266 kDa          | 0.72 | 12                       | 0                        | 13                       | 0    | 0    | 0    | 0    | 12   | 0    | 0    | 0    | 12.76590882                | 95% (< 0.00010)      |
| CH60_HUMAN        | COCA1_HUMAN                | COL12A1                  | Q99715                         | Collagen alpha-1(XII) chain                                                                                                                                                  | 333 kDa          | 0.48 | 24                       | 1                        | 23                       | 0    | 0    | 1    | 0    | 12   | 1    | 6    | 4    | 12.07071565                | 95% (< 0.00010)      |
| Q53G99_HUMAN      | Q52NV4_HUMAN               | HRS                      | Q52NV4                         | Histidyl-tRNA synthetase                                                                                                                                                     | 57 kDa           | 0.52 | 13                       | 0                        | 12                       | 0    | 0    | 0    | 0    | 6    | 0    | 2    | 0    | 11.8698848                 | 95% (0.00012)        |
| AHNK_HUMAN        | C9J837_HUMAN               | RAB3GAP1                 | C9J837                         | Rab3 GTPase-activating protein catalytic subunit                                                                                                                             | 111 kDa          | 0.28 | 11                       | 0                        | 11                       | 0    | 0    | 0    | 0    | 0    | 9    | 2    | 0    | 10.97388655                | 95% (0.00025)        |
| ATPB_HUMAN        | ASNS_HUMAN                 | ASNS                     | P08243                         | Asparagine synthetase [glutamine-hydrolyzing] (EC 6.3.5.4) (Cell cycle control protein TS11) (Glutamine-dependent asparagine synthetase)                                     | 64 kDa           | 0.42 | 21                       | 1                        | 20                       | 0    | 0    | 1    | 0    | 9    | 10   | 1    | 0    | 10.57697465                | 95% (< 0.00010)      |
| ENPL_HUMAN (+1)   | B2RCG8_HUMAN               |                          | B2RCG8                         | cDNA, FLJ96063, highly similar to Homo sapiens rhophilin, Rho GTPase binding protein 2 (RHPN2), mRNA                                                                         | 77 kDa           | 0.42 | 10                       | 0                        | 10                       | 0    | 0    | 0    | 0    | 2    | 5    | 0    | 3    | 10.07791409                | 95% (0.00053)        |
| CLH1_HUMAN        | B4DF41_HUMAN               | MSH6                     | B4DF41                         | DNA mismatch repair protein Msh6 (cDNA FLJ55677, highly similar to DNA mismatch repair protein MSH6)                                                                         | 138 kDa          | 0.39 | 9                        | 0                        | 9                        | 0    | 0    | 0    | 0    | 8    | 0    | 1    | 0    | 9.181967408                | 95% (0.0011)         |
| PDIA1_HUMAN       | A8K2Q7_HUMAN               |                          | A8K2Q7                         | cDNA FLJ77928, highly similar to Homo sapiens acyl-CoA synthetase medium-chain family member 3 (ACSM3), transcript variant 1, mRNA                                           | 66 kDa           | 0.56 | 9                        | 0                        | 9                        | 0    | 0    | 0    | 0    | 9    | 0    | 0    | 0    | 9.181967408                | 95% (0.0011)         |
| TBB5_HUMAN        | B3KMS0_HUMAN               |                          | B3KMS0                         | Condensin complex subunit 1                                                                                                                                                  | 157 kDa          | 0.49 | 9                        | 0                        | 9                        | 0    | 0    | 0    | 0    | 8    | 0    | 1    | 0    | 9.181967408                | 95% (0.0011)         |
| B7Z4V2_HUMAN (+1) | CD2A1_HUMAN                | CDKN2A                   | P42771                         | Cyclin-dependent kinase inhibitor 2A, isoforms 1/2/3 (Cyclin-dependent kinase 4 inhibitor A) (CDK4I) (Multiple tumor suppressor 1) (MTS-1) (p16-INK4a) (p16-INK4) (p16INK4A) | 17 kDa           | 0.51 | 9                        | 0                        | 9                        | 0    | 0    | 0    | 0    | 3    | 6    | 0    | 0    | 9.181967408                | 95% (0.0011)         |
| ATPA_HUMAN        | Q86YH3_HUMAN               | EARS2                    | Q86YH3                         | EARS2 protein                                                                                                                                                                | 60 kDa           | 0.47 | 7                        | 0                        | 8                        | 0    | 0    | 0    | 0    | 1    | 0    | 2    | 4    | 8.286046503                | 95% (0.0024)         |
| B2R5B3_HUMAN (+4) | A8K9U6_HUMAN               |                          | A8K9U6                         | cDNA FLJ76121, highly similar to Homo sapiens zinc finger CCCH-type, antiviral 1 (ZC3HAV1), transcript variant 1, mRNA                                                       | 101 kDa          | 0.46 | 8                        | 0                        | 8                        | 0    | 0    | 0    | 0    | 2    | 1    | 4    | 0    | 8.286046503                | 95% (0.0024)         |
| MYH9_HUMAN        | D6RE83_HUMAN               | UCHL1                    | D6RE83                         | Ubiquitin carboxyl-terminal hydrolase isozyme L1                                                                                                                             | 23 kDa           | 0.38 | 8                        | 0                        | 8                        | 0    | 0    | 0    | 0    | 0    | 5    | 3    | 0    | 8.286046503                | 95% (0.0024)         |

|                   |              |        |        |                                                                                                                                                                                                                                                                                                                                                                           |         |      |    |   |    |   |   |   |   |   |    |   |   |             |                |
|-------------------|--------------|--------|--------|---------------------------------------------------------------------------------------------------------------------------------------------------------------------------------------------------------------------------------------------------------------------------------------------------------------------------------------------------------------------------|---------|------|----|---|----|---|---|---|---|---|----|---|---|-------------|----------------|
| LMNA_HUMAN        | B3KUH3_HUMAN |        | B3KUH3 | cDNA FLJ39896 fis, clone SPLEN2016972                                                                                                                                                                                                                                                                                                                                     | 90 kDa  | 0.59 | 7  | 0 | 7  | 0 | 0 | 0 | 0 | 0 | 0  | 1 | 6 | 7.390151376 | 95% (0.0051)   |
| C8C504_HUMAN (+1) | CADH6_HUMAN  | CDH6   | P55285 | Cadherin-6 (Kidney cadherin) (K-cadherin)                                                                                                                                                                                                                                                                                                                                 | 88 kDa  | 0.82 | 7  | 0 | 7  | 0 | 0 | 0 | 0 | 4 | 0  | 1 | 2 | 7.390151376 | 95% (0.0051)   |
| IDHP_HUMAN        | AK1C1_HUMAN  | AKR1C1 | Q04828 | Aldo-keto reductase family 1 member C1 (EC 1.1.1.-) (20-alpha-hydroxysteroid dehydrogenase) (20-alpha-HSD) (EC 1.1.1.149) (Chlordecone reductase homolog HAKRC) (Dihydrodiol dehydrogenase 1/2) (DD1/DD2) (High-affinity hepatic bile acid-binding protein) (HBAB) (Indanol dehydrogenase) (EC 1.1.1.112) (Trans-1,2-dihydrobenzene-1,2-diol dehydrogenase) (EC 1.3.1.20) | 37 kDa  | 0.56 | 7  | 0 | 7  | 0 | 0 | 0 | 0 | 0 | 6  | 1 | 0 | 7.390151376 | 95% (0.0051)   |
| LPPRC_HUMAN       | A8K5Y7_HUMAN |        | A8K5Y7 | cDNA FLJ78655, highly similar to Homo sapiens exportin 5 (XPO5), mRNA                                                                                                                                                                                                                                                                                                     | 136 kDa | 0.5  | 22 | 2 | 20 | 0 | 0 | 0 | 2 | 3 | 11 | 6 | 0 | 7.322426833 | 95% (<0.00010) |
| B3KQT9_HUMAN (+2) | FDFT_HUMAN   | FDFT1  | P37268 | Squalene synthase (SQS) (SS) (EC 2.5.1.21) (FPP:FPP farnesyltransferase) (Farnesyl-diphosphate farnesyltransferase)                                                                                                                                                                                                                                                       | 48 kDa  | 0.53 | 13 | 1 | 12 | 1 | 0 | 0 | 0 | 9 | 1  | 2 | 0 | 6.594295719 | 95% (0.00087)  |
| HSP7C_HUMAN       | A8KAQ3_HUMAN |        | A8KAQ3 | cDNA FLJ76489, highly similar to Homo sapiens sortilin 1 (SORT1), mRNA                                                                                                                                                                                                                                                                                                    | 92 kDa  | 0.45 | 13 | 1 | 12 | 0 | 0 | 0 | 1 | 3 | 3  | 1 | 5 | 6.594295719 | 95% (0.00087)  |
| MYOF_HUMAN        | TRIP12_HUMAN | TRIP12 | Q14669 | E3 ubiquitin-protein ligase TRIP12 (EC 6.3.2.-) (E3 ubiquitin-protein ligase for Arf) (ULF) (Thyroid receptor-interacting protein 12) (TR-interacting protein 12) (TRIP-12)                                                                                                                                                                                               | 220 kDa | 0.43 | 6  | 0 | 6  | 0 | 0 | 0 | 0 | 2 | 0  | 4 | 0 | 6.494282025 | 95% (0.011)    |
| KPYM_HUMAN        | A8K984_HUMAN |        | A8K984 | Structural maintenance of chromosomes protein                                                                                                                                                                                                                                                                                                                             | 136 kDa | 0.57 | 6  | 0 | 6  | 0 | 0 | 0 | 0 | 4 | 0  | 1 | 0 | 6.494282025 | 95% (0.011)    |
| PRKDC_HUMAN       | A8K5B6_HUMAN |        | A8K5B6 | cDNA FLJ76830, highly similar to Homo sapiens SWI/SNF related, matrix associated, actin dependent regulator of chromatin, subfamily a, member 3 (SMARCA3), transcript variant 1, mRNA                                                                                                                                                                                     | 114 kDa | 0.26 | 6  | 0 | 6  | 0 | 0 | 0 | 0 | 6 | 0  | 0 | 0 | 6.494282025 | 95% (0.011)    |
| HS90B_HUMAN       | D3DNT9_HUMAN | EPHB3  | D3DNT9 | EPH receptor B3, isoform CRA_a                                                                                                                                                                                                                                                                                                                                            | 106 kDa | 0.45 | 6  | 0 | 6  | 0 | 0 | 0 | 0 | 4 | 0  | 2 | 0 | 6.494282025 | 95% (0.011)    |
| B4DMF5_HUMAN (+2) | B4DKC8_HUMAN |        | B4DKC8 | cDNA FLJ56098, highly similar to Sodium bicarbonate transporter-like protein 11                                                                                                                                                                                                                                                                                           | 103 kDa | 0.47 | 6  | 0 | 6  | 0 | 0 | 0 | 0 | 2 | 0  | 0 | 4 | 6.494282025 | 95% (0.011)    |
| ADT2_HUMAN        | A8K245_HUMAN |        | A8K245 | cDNA FLJ75441, highly similar to Homo sapiens vaccinia related kinase 1 (VRK1), mRNA                                                                                                                                                                                                                                                                                      | 45 kDa  | 0.62 | 6  | 0 | 6  | 0 | 0 | 0 | 0 | 2 | 0  | 4 | 0 | 6.494282025 | 95% (0.011)    |
| FLNA_HUMAN (+1)   | ARL3_HUMAN   | ARL3   | P36405 | ADP-ribosylation factor-like protein 3                                                                                                                                                                                                                                                                                                                                    | 20 kDa  | 0.32 | 6  | 0 | 6  | 0 | 0 | 0 | 0 | 1 | 4  | 1 | 0 | 6.494282025 | 95% (0.011)    |
| MDHM_HUMAN (+2)   | A8K6A6_HUMAN |        | A8K6A6 | cDNA FLJ78619, highly similar to Homo sapiens melanoma cell adhesion molecule (MCAM), mRNA                                                                                                                                                                                                                                                                                | 72 kDa  | 0.63 | 6  | 0 | 6  | 0 | 0 | 0 | 0 | 5 | 1  | 0 | 0 | 6.494282025 | 95% (0.011)    |
| ECHA_HUMAN        | AOFA_HUMAN   | MAOA   | P21397 | Amine oxidase [flavin-containing] A (EC 1.4.3.4) (Monoamine oxidase type A) (MAO-A)                                                                                                                                                                                                                                                                                       | 60 kDa  | 0.39 | 6  | 0 | 6  | 0 | 0 | 0 | 0 | 0 | 3  | 0 | 3 | 6.494282025 | 95% (0.011)    |
| F5H5D3_HUMAN (+2) | B4DIH5_HUMAN | COPS2  | B4DIH5 | COP9 signalosome complex subunit 2 (cDNA FLJ52928, highly similar to COP9 signalosome complex subunit 2)                                                                                                                                                                                                                                                                  | 44 kDa  | 0.37 | 5  | 0 | 6  | 0 | 0 | 0 | 0 | 3 | 2  | 1 | 0 | 6.494282025 | 95% (0.011)    |
| ANXA1_HUMAN       | B4DVV7_HUMAN |        | B4DVV7 | cDNA FLJ51339, highly similar to Methionyl-tRNA synthetase, mitochondrial (EC 6.1.1.10)                                                                                                                                                                                                                                                                                   | 58 kDa  | 0.59 | 5  | 0 | 6  | 0 | 0 | 0 | 0 | 2 | 1  | 0 | 2 | 6.494282025 | 95% (0.011)    |

|                  |              |          |        |                                                                                                                                                                                                                                                                                                    |         |      |    |   |    |   |   |   |   |    |    |    |    |             |                 |
|------------------|--------------|----------|--------|----------------------------------------------------------------------------------------------------------------------------------------------------------------------------------------------------------------------------------------------------------------------------------------------------|---------|------|----|---|----|---|---|---|---|----|----|----|----|-------------|-----------------|
| ACTN4_HUMAN      | UGDH_HUMAN   | UGDH     | O60701 | UDP-glucose 6-dehydrogenase (UDP-Glc dehydrogenase) (UDP-GlcDH) (UDPGDH) (EC 1.1.1.22)                                                                                                                                                                                                             | 55 kDa  | 0.59 | 26 | 3 | 23 | 1 | 1 | 1 | 0 | 2  | 15 | 6  | 0  | 6.390214665 | 95% (< 0.00010) |
| B4DJ30_HUMAN(+1) | P5CR2_HUMAN  | PYCR2    | Q96C36 | Pyroline-5-carboxylate reductase 2 (P5C reductase 2) (P5CR 2) (EC 1.5.1.2)                                                                                                                                                                                                                         | 34 kDa  | 0.33 | 29 | 4 | 26 | 0 | 0 | 0 | 3 | 12 | 12 | 12 | 12 | 5.813169761 | 95% (< 0.00010) |
| ROA2_HUMAN       | CPSF3_HUMAN  | CPSF3    | Q9UKF6 | Cleavage and polyadenylation specificity factor subunit 3 (EC 3.1.27.-) (Cleavage and polyadenylation specificity factor 73 kDa subunit) (CPSF 73 kDa subunit) (mRNA 3'-end-processing endonuclease CPSF-73)                                                                                       | 77 kDa  | 0.5  | 11 | 1 | 10 | 0 | 0 | 1 | 0 | 1  | 0  | 7  | 2  | 5.598769229 | 95% (0.0034)    |
| DYHC1_HUMAN      | B4DHQ3_HUMAN |          | B4DHQ3 | Phosphoserine aminotransferase (EC 2.6.1.52)                                                                                                                                                                                                                                                       | 45 kDa  | 0.2  | 11 | 1 | 10 | 0 | 0 | 0 | 1 | 5  | 4  | 1  | 0  | 5.598769229 | 95% (0.0034)    |
| ENOA_HUMAN       | K0020_HUMAN  | KIAA0020 | Q15397 | Pumilio domain-containing protein KIAA0020 (HBV X-transactivated gene 5 protein) (HBV XAg-transactivated protein 5) (Minor histocompatibility antigen HA-8) (HLA-HA8)                                                                                                                              | 74 kDa  | 0.46 | 5  | 0 | 5  | 0 | 0 | 0 | 0 | 2  | 2  | 1  | 0  | 5.59843845  | 95% (0.023)     |
| B4DGP8_HUMAN(+1) | MAA1_HUMAN   | GSTZ1    | O43708 | Maleylacetoacetate isomerase (MAAI) (EC 5.2.1.2) (GSTZ1-1) (Glutathione S-transferase zeta 1) (EC 2.5.1.18)                                                                                                                                                                                        | 24 kDa  | 0.31 | 5  | 0 | 5  | 0 | 0 | 0 | 0 | 2  | 1  | 2  | 0  | 5.59843845  | 95% (0.023)     |
| HSP71_HUMAN      | UBE2O_HUMAN  | UBE2O    | Q9C0C9 | Ubiquitin-conjugating enzyme E2 O (EC 6.3.2.19) (Ubiquitin carrier protein O) (Ubiquitin-conjugating enzyme E2 of 230 kDa) (Ubiquitin-conjugating enzyme E2-230K) (Ubiquitin-protein ligase O)                                                                                                     | 141 kDa | 0.37 | 5  | 0 | 5  | 0 | 0 | 0 | 0 | 0  | 4  | 1  | 0  | 5.59843845  | 95% (0.023)     |
| VIME_HUMAN       | INT3_HUMAN   | INTS3    | Q68E01 | Integrator complex subunit 3 (Int3) (SOSS complex subunit A) (Sensor of single-strand DNA complex subunit A) (SOSS-A) (Sensor of ssDNA subunit A)                                                                                                                                                  | 118 kDa | 0.56 | 5  | 0 | 5  | 0 | 0 | 0 | 0 | 1  | 1  | 2  | 1  | 5.59843845  | 95% (0.023)     |
| CATD_HUMAN       | AURKB_HUMAN  | AURKB    | Q96GD4 | Aurora kinase B (EC 2.7.11.1) (Aurora 1) (Aurora- and IPL1-like midbody-associated protein 1) (AIM-1) (Aurora/IPL1-related kinase 2) (ARK-2) (Aurora-related kinase 2) (STK-1) (Serine/threonine-protein kinase 12) (Serine/threonine-protein kinase 5) (Serine/threonine-protein kinase aurora-B) | 39 kDa  | 0.41 | 5  | 0 | 5  | 0 | 0 | 0 | 0 | 1  | 0  | 4  | 0  | 5.59843845  | 95% (0.023)     |
| DHX9_HUMAN       | Q59GW6_HUMAN |          | Q59GW6 | Acetyl-CoA acetyltransferase, cytosolic variant (Fragment)                                                                                                                                                                                                                                         | 42 kDa  | 0.29 | 5  | 0 | 5  | 0 | 0 | 0 | 0 | 5  | 0  | 0  | 0  | 5.59843845  | 95% (0.023)     |
| EF1A1_HUMAN(+5)  | B2R6H7_HUMAN |          | B2R6H7 | cDNA, FLJ92955, highly similar to Homo sapiens transportin-SR (TRN-SR), mRNA                                                                                                                                                                                                                       | 104 kDa | 0.32 | 5  | 0 | 5  | 0 | 0 | 0 | 0 | 3  | 1  | 1  | 0  | 5.59843845  | 95% (0.023)     |
| ANXA5_HUMAN      | E7ESY4_HUMAN | MTA1     | E7ESY4 | Metastasis-associated protein MTA1                                                                                                                                                                                                                                                                 | 79 kDa  | 0.6  | 8  | 0 | 5  | 0 | 0 | 0 | 0 | 1  | 0  | 3  | 0  | 5.59843845  | 95% (0.023)     |
| A4QPBO_HUMAN(+1) | B7ZMD7_HUMAN | AMY1A    | B7ZMD7 | Amylase, alpha 1A (Salivary)                                                                                                                                                                                                                                                                       | 58 kDa  | 0.29 | 5  | 0 | 5  | 0 | 0 | 0 | 0 | 0  | 5  | 0  | 0  | 5.59843845  | 95% (0.023)     |
| AT1A1_HUMAN      | A8K4T2_HUMAN |          | A8K4T2 | cDNA FLJ76281, highly similar to Homo sapiens DnaJ (Hsp40) homolog, subfamily C, member 7 (DNAJC7), mRNA                                                                                                                                                                                           | 55 kDa  | 0.37 | 5  | 0 | 5  | 0 | 0 | 0 | 0 | 3  | 1  | 1  | 0  | 5.59843845  | 95% (0.023)     |
| TFR1_HUMAN       | E9PKF6_HUMAN | PPP6R3   | E9PKF6 | Serine/threonine-protein phosphatase 6 regulatory subunit 3                                                                                                                                                                                                                                        | 94 kDa  | 0.41 | 5  | 0 | 5  | 0 | 0 | 0 | 0 | 0  | 4  | 1  | 0  | 5.59843845  | 95% (0.023)     |
| PGK1_HUMAN       | A8K559_HUMAN |          | A8K559 | cDNA FLJ76187                                                                                                                                                                                                                                                                                      | 51 kDa  | 0.62 | 5  | 0 | 5  | 0 | 0 | 0 | 0 | 0  | 0  | 2  | 3  | 5.59843845  | 95% (0.023)     |
| G3P_HUMAN(+1)    | PLAP_HUMAN   | PLAA     | Q9Y263 | Phospholipase A-2-activating protein (PLA2P) (PLAP)                                                                                                                                                                                                                                                | 87 kDa  | 0.35 | 5  | 0 | 5  | 0 | 0 | 0 | 0 | 2  | 3  | 0  | 0  | 5.59843845  | 95% (0.023)     |
| PDIA4_HUMAN      | ADHX_HUMAN   | ADH5     | P11766 | Alcohol dehydrogenase class-3 (EC 1.1.1.1) (Alcohol dehydrogenase 5) (Alcohol                                                                                                                                                                                                                      | 40 kDa  | 0.38 | 5  | 0 | 5  | 0 | 0 | 0 | 0 | 2  | 3  | 0  | 0  | 5.59843845  | 95% (0.023)     |

|                     |              |         |        |                                                                                                                                                                                                                                                                       |         |      |    |   |    |   |   |   |   |    |   |   |   |             |               |
|---------------------|--------------|---------|--------|-----------------------------------------------------------------------------------------------------------------------------------------------------------------------------------------------------------------------------------------------------------------------|---------|------|----|---|----|---|---|---|---|----|---|---|---|-------------|---------------|
|                     |              |         |        | dehydrogenase class chi chain)<br>(Alcohol dehydrogenase class-III) (Glutathione-dependent formaldehyde dehydrogenase) (FALDH) (FDH) (GSH-FDH) (EC 1.1.1.-) (S-(hydroxymethyl)glutathione dehydrogenase) (EC 1.1.1.284)                                               |         |      |    |   |    |   |   |   |   |    |   |   |   |             |               |
| DHB4_HUMAN          | AURKA_HUMAN  | AURKA   | O14965 | Aurora kinase A (EC 2.7.11.1) (Aurora 2) (Aurora/IPL1-related kinase 1) (ARK-1) (Aurora-related kinase 1) (hARK1) (Breast tumor-amplified kinase) (Serine/threonine-protein kinase 15) (Serine/threonine-protein kinase 6) (Serine/threonine-protein kinase aurora-A) | 46 kDa  | 0.34 | 5  | 0 | 5  | 0 | 0 | 0 | 0 | 0  | 3 | 1 | 0 | 5.59843845  | 95% (0.023)   |
| TERA_HUMAN          | HEAT2_HUMAN  | HEATR2  | Q86Y56 | HEAT repeat-containing protein 2                                                                                                                                                                                                                                      | 94 kDa  | 0.39 | 5  | 0 | 5  | 0 | 0 | 0 | 0 | 1  | 2 | 1 | 0 | 5.59843845  | 95% (0.023)   |
| SERPH_HUMAN         | FAD1_HUMAN   | FLAD1   | Q8NFF5 | FAD synthase (EC 2.7.7.2) (FAD pyrophosphorylase) (FMN adenylyltransferase) (Flavin adenine dinucleotide synthase) [Includes: Molybdenum cofactor biosynthesis protein-like region; FAD synthase region]                                                              | 65 kDa  | 0.41 | 22 | 3 | 19 | 0 | 0 | 0 | 3 | 11 | 2 | 3 | 3 | 5.335851521 | 95% (0.0016)  |
| H2AY_HUMAN          | LAMA5_HUMAN  | LAMA5   | O15230 | Laminin subunit alpha-5 (Laminin-10 subunit alpha) (Laminin-11 subunit alpha) (Laminin-15 subunit alpha)                                                                                                                                                              | 400 kDa | 0.41 | 10 | 1 | 9  | 1 | 0 | 0 | 0 | 3  | 1 | 3 | 2 | 5.101027466 | 95% (0.0065)  |
| A8K9A4_HUMAN (+7)   | MET7B_HUMAN  | METTL7B | Q6UX53 | Methyltransferase-like protein 7B (EC 2.1.1.-)                                                                                                                                                                                                                        | 28 kDa  | 0.37 | 10 | 1 | 9  | 1 | 0 | 0 | 0 | 6  | 1 | 1 | 1 | 5.101027466 | 95% (0.0065)  |
| Q53EP4_HUMAN N (+2) | B4DL39_HUMAN |         | B4DL39 | cDNA FLJ57316, highly similar to DNA mismatch repair protein Msh2                                                                                                                                                                                                     | 77 kDa  | 0.37 | 10 | 1 | 9  | 0 | 0 | 0 | 1 | 2  | 1 | 6 | 0 | 5.101027466 | 95% (0.0065)  |
| ACADV_HUMAN         | A8K139_HUMAN |         | A8K139 | cDNA FLJ76744, highly similar to Homo sapiens L1 cell adhesion molecule (L1CAM), transcript variant 1, mRNA                                                                                                                                                           | 140 kDa | 0.44 | 10 | 1 | 9  | 1 | 0 | 0 | 0 | 7  | 0 | 1 | 1 | 5.101027466 | 95% (0.0065)  |
| EFTU_HUMAN          | TF3C3_HUMAN  | GTF3C3  | Q9Y5Q9 | General transcription factor 3C polypeptide 3 (Transcription factor IIC 102 kDa subunit) (TFIIC 102 kDa subunit) (TFIIC102) (Transcription factor IIC subunit gamma) (TF3C-gamma)                                                                                     | 101 kDa | 0.52 | 10 | 1 | 9  | 0 | 0 | 0 | 1 | 4  | 0 | 3 | 2 | 5.101027466 | 95% (0.0065)  |
| CALR_HUMAN (+1)     | B4DSK8_HUMAN |         | B4DSK8 | cDNA FLJ53515, highly similar to Pogo transposable element with ZNF domain                                                                                                                                                                                            | 86 kDa  | 0.32 | 10 | 1 | 9  | 0 | 0 | 0 | 1 | 2  | 0 | 7 | 0 | 5.101027466 | 95% (0.0065)  |
| F6KPG5_HUMAN        | J3KR97_HUMAN | TBCD    | J3KR97 | Tubulin-specific chaperone D                                                                                                                                                                                                                                          | 137 kDa | 0.37 | 10 | 1 | 9  | 0 | 1 | 0 | 0 | 1  | 7 | 1 | 0 | 5.101027466 | 95% (0.0065)  |
| HBA_HUMAN (+1)      | B4DMB5_HUMAN |         | B4DMB5 | CTP synthase (EC 6.3.4.2) (UTP--ammonia ligase)                                                                                                                                                                                                                       | 56 kDa  | 0.51 | 10 | 1 | 9  | 0 | 0 | 0 | 1 | 5  | 5 | 0 | 0 | 5.101027466 | 95% (0.0065)  |
| PPIB_HUMAN          | CTR2_HUMAN   | SLC7A2  | P52569 | Low affinity cationic amino acid transporter 2 (CAT-2) (CAT2) (Solute carrier family 7 member 2)                                                                                                                                                                      | 72 kDa  | 0.62 | 10 | 1 | 9  | 1 | 0 | 0 | 0 | 1  | 3 | 2 | 3 | 5.101027466 | 95% (0.0065)  |
| E9PL22_HUMAN N (+1) | LRBA_HUMAN   | LRBA    | P50851 | Lipopolysaccharide-responsive and beige-like anchor protein (Beige-like protein) (CDC4-like protein)                                                                                                                                                                  | 319 kDa | 0.31 | 21 | 3 | 18 | 3 | 0 | 0 | 0 | 5  | 9 | 3 | 2 | 5.072279699 | 95% (0.00029) |
| U520_HUMAN          | A8K3R2_HUMAN |         | A8K3R2 | cDNA FLJ78061, highly similar to Homo sapiens block of proliferation 1, mRNA                                                                                                                                                                                          | 84 kDa  | 0.27 | 4  | 0 | 4  | 0 | 0 | 0 | 0 | 2  | 0 | 0 | 2 | 4.702620648 | 95% (0.049)   |
| SQRD_HUMAN          | J3KNH7_HUMAN | SEN3    | J3KNH7 | Sentrin-specific protease 3                                                                                                                                                                                                                                           | 65 kDa  | 0.52 | 4  | 0 | 4  | 0 | 0 | 0 | 0 | 2  | 0 | 2 | 0 | 4.702620648 | 95% (0.049)   |
| Q7Z7M4_HUMAN N (+1) | NUP50_HUMAN  | NUP50   | Q9UKX7 | Nuclear pore complex protein Nup50 (50 kDa nucleoporin) (Nuclear pore-associated protein 60 kDa-like) (Nucleoporin Nup50)                                                                                                                                             | 50 kDa  | 0.42 | 4  | 0 | 4  | 0 | 0 | 0 | 0 | 2  | 0 | 2 | 0 | 4.702620648 | 95% (0.049)   |

|                   |              |          |        |                                                                                                                                                                                                                                                                                                                                                        |        |      |   |   |   |   |   |   |   |   |   |   |   |             |             |
|-------------------|--------------|----------|--------|--------------------------------------------------------------------------------------------------------------------------------------------------------------------------------------------------------------------------------------------------------------------------------------------------------------------------------------------------------|--------|------|---|---|---|---|---|---|---|---|---|---|---|-------------|-------------|
| B3KX72_HUMAN (+1) | B4DDT6_HUMAN |          | B4DDT6 | cDNA FLJ60416                                                                                                                                                                                                                                                                                                                                          | 18 kDa | 0.26 | 4 | 0 | 4 | 0 | 0 | 0 | 0 | 0 | 3 | 1 | 0 | 4.702620648 | 95% (0.049) |
| MPCP_HUMAN (+1)   | E7EU94_HUMAN | PRPF31   | E7EU94 | U4/U6 small nuclear ribonucleoprotein Prp31 (Fragment)                                                                                                                                                                                                                                                                                                 | 29 kDa | 0.36 | 4 | 0 | 4 | 0 | 0 | 0 | 0 | 2 | 2 | 0 | 0 | 4.702620648 | 95% (0.049) |
| GPDM_HUMAN (+1)   | A8K070_HUMAN |          | A8K070 | cDNA FLJ75157, highly similar to Homo sapiens G protein pathway suppressor 1, transcript variant 1, mRNA                                                                                                                                                                                                                                               | 59 kDa | 0.39 | 4 | 0 | 4 | 0 | 0 | 0 | 0 | 1 | 2 | 1 | 0 | 4.702620648 | 95% (0.049) |
| B4E1G2_HUMAN (+3) | A8KAM9_HUMAN |          | A8KAM9 | Peptidyl-prolyl cis-trans isomerase E (PPIase E) (EC 5.2.1.8)                                                                                                                                                                                                                                                                                          | 33 kDa | 0.41 | 4 | 0 | 4 | 0 | 0 | 0 | 0 | 2 | 0 | 2 | 0 | 4.702620648 | 95% (0.049) |
| PHB2_HUMAN        | RAB7B_HUMAN  | RAB7B    | Q96AH8 | Ras-related protein Rab-7b                                                                                                                                                                                                                                                                                                                             | 23 kDa | 0.63 | 4 | 0 | 4 | 0 | 0 | 0 | 0 | 0 | 0 | 0 | 4 | 4.702620648 | 95% (0.049) |
| PHB_HUMAN (+2)    | RABP1_HUMAN  | CRABP1   | P29762 | Cellular retinoic acid-binding protein 1 (Cellular retinoic acid-binding protein 1) (CRABP-1)                                                                                                                                                                                                                                                          | 16 kDa | 0.56 | 3 | 0 | 4 | 0 | 0 | 0 | 0 | 0 | 4 | 0 | 0 | 4.702620648 | 95% (0.049) |
| VDAC1_HUMAN       | CRP_HUMAN    | CRP      | P02741 | C-reactive protein [Cleaved into: C-reactive protein(1-205)]                                                                                                                                                                                                                                                                                           | 25 kDa | 0.43 | 4 | 0 | 4 | 0 | 0 | 0 | 0 | 0 | 0 | 0 | 4 | 4.702620648 | 95% (0.049) |
| ESYT1_HUMAN       | COQ3_HUMAN   | COQ3     | Q9NZJ6 | Hexaprenyldihydroxybenzoate methyltransferase, mitochondrial (EC 2.1.1.114) (2-polyprenyl-6-hydroxyphenol methylase) (EC 2.1.1.222) (3,4-dihydroxy-5-hexaprenylbenzoate methyltransferase) (DHMB methyltransferase) (DHMB-MT) (DHMB-MTase) (3-demethylubiquinone-10 3-methyltransferase) (EC 2.1.1.64) (Dihydroxyhexaprenylbenzoate methyltransferase) | 41 kDa | 0.28 | 4 | 0 | 4 | 0 | 0 | 0 | 0 | 4 | 0 | 0 | 0 | 4.702620648 | 95% (0.049) |
| B3KVV6_HUMAN (+1) | RM20_HUMAN   | MRPL20   | Q9BYC9 | 39S ribosomal protein L20, mitochondrial (L20mt) (MRP-L20)                                                                                                                                                                                                                                                                                             | 17 kDa | 0.53 | 4 | 0 | 4 | 0 | 0 | 0 | 0 | 1 | 1 | 0 | 2 | 4.702620648 | 95% (0.049) |
| F8W6I7_HUMAN (+1) | PTX3_HUMAN   | PTX3     | P26022 | Pentraxin-related protein PTX3 (Pentaxin-related protein PTX3) (Tumor necrosis factor alpha-induced protein 5) (TNF alpha-induced protein 5) (Tumor necrosis factor-inducible gene 14 protein) (TSG-14)                                                                                                                                                | 42 kDa | 0.44 | 4 | 0 | 4 | 0 | 0 | 0 | 0 | 1 | 0 | 3 | 0 | 4.702620648 | 95% (0.049) |
| B4DJV2_HUMAN (+1) | NHERF2_HUMAN | SLC9A3R2 | Q15599 | Na(+)/H(+) exchange regulatory cofactor NHE-RF2 (NHERF-2) (NHE3 kinase A regulatory protein E3KARP) (SRY-interacting protein 1) (SIP-1) (Sodium-hydrogen exchanger regulatory factor 2) (Solute carrier family 9 isoform A3 regulatory factor 2) (Tyrosine kinase activator protein 1) (TKA-1)                                                         | 37 kDa | 0.32 | 4 | 0 | 4 | 0 | 0 | 0 | 0 | 2 | 0 | 1 | 1 | 4.702620648 | 95% (0.049) |
| A6NG51_HUMAN (+1) | GSH0_HUMAN   | GCLM     | P48507 | Glutamate--cysteine ligase regulatory subunit (GCS light chain) (Gamma-ECS regulatory subunit) (Gamma-glutamylcysteine synthetase regulatory subunit) (Glutamate--cysteine ligase modifier subunit)                                                                                                                                                    | 31 kDa | 0.22 | 4 | 0 | 4 | 0 | 0 | 0 | 0 | 0 | 4 | 0 | 0 | 4.702620648 | 95% (0.049) |
| HS90A_HUMAN       | S35E1_HUMAN  | SLC35E1  | Q96K37 | Solute carrier family 35 member E1                                                                                                                                                                                                                                                                                                                     | 45 kDa | 0.41 | 4 | 0 | 4 | 0 | 0 | 0 | 0 | 0 | 2 | 0 | 2 | 4.702620648 | 95% (0.049) |
| RAB7A_HUMAN       | GMPPA_HUMAN  | GMPPA    | Q96IJ6 | Mannose-1-phosphate guanylttransferase alpha (EC 2.7.7.13) (GDP-mannose pyrophosphorylase A) (GTP-mannose-1-phosphate guanylyltransferase alpha)                                                                                                                                                                                                       | 46 kDa | 0.61 | 4 | 0 | 4 | 0 | 0 | 0 | 0 | 0 | 2 | 1 | 1 | 4.702620648 | 95% (0.049) |
| B3KY95_HUMAN (+1) | A8K005_HUMAN |          | A8K005 | cDNA FLJ77896, highly similar to Homo sapiens Ras homolog enriched in brain (RHEB), mRNA                                                                                                                                                                                                                                                               | 20 kDa | 0.3  | 9 | 1 | 8 | 0 | 1 | 0 | 0 | 1 | 4 | 3 | 0 | 4.603300025 | 95% (0.013) |



|                   |              |         |        |                                                                                                                                                                                                                             |         |      |     |    |    |   |   |   |    |    |    |    |    |             |                 |
|-------------------|--------------|---------|--------|-----------------------------------------------------------------------------------------------------------------------------------------------------------------------------------------------------------------------------|---------|------|-----|----|----|---|---|---|----|----|----|----|----|-------------|-----------------|
| AT2A2_HUMAN       | A0JP11_HUMAN | PIK3R4  | A0JP11 | Phosphoinositide-3-kinase, regulatory subunit 4                                                                                                                                                                             | 153 kDa | 0.32 | 9   | 1  | 8  | 0 | 1 | 0 | 0  | 5  | 2  | 1  | 0  | 4.603300025 | 95% (0.013)     |
| XRCC6_HUMAN       | SAHH3_HUMAN  | AHCYL2  | Q96HN2 | Putative adenosylhomocysteinase 3 (AdoHcyase 3) (EC 3.3.1.1) (S-adenosyl-L-homocysteine hydrolase 3) (S-adenosylhomocysteine hydrolase-like protein 2)                                                                      | 67 kDa  | 0.38 | 9   | 1  | 8  | 0 | 0 | 0 | 1  | 2  | 2  | 4  | 0  | 4.603300025 | 95% (0.013)     |
| ODPB_HUMAN        | 2ABA_HUMAN   | PPP2R2A | P63151 | Serine/threonine-protein phosphatase 2A 55 kDa regulatory subunit B alpha isoform (PP2A subunit B isoform B55-alpha) (PP2A subunit B isoform PR55-alpha) (PP2A subunit B isoform R2-alpha) (PP2A subunit B isoform alpha)   | 52 kDa  | 0.39 | 9   | 1  | 8  | 1 | 0 | 0 | 0  | 3  | 4  | 2  | 0  | 4.603300025 | 95% (0.013)     |
| LMNB1_HUMAN       | RBM10_HUMAN  | RBM10   | P98175 | RNA-binding protein 10 (G patch domain-containing protein 9) (RNA-binding motif protein 10) (RNA-binding protein S1-1) (S1-1)                                                                                               | 104 kDa | 0.45 | 9   | 1  | 8  | 0 | 0 | 0 | 1  | 1  | 0  | 4  | 3  | 4.603300025 | 95% (0.013)     |
| FLNB_HUMAN        | B3GA3_HUMAN  | B3GAT3  | O94766 | Galactosylgalactosylxylosylprotein 3-beta-glucuronosyltransferase 3 (EC 2.4.1.135) (Beta-1,3-glucuronyltransferase 3) (Glucuronosyltransferase I) (GlcAT-I) (UDP-GlcUA:Gal beta-1,3-Gal-R glucuronyltransferase) (GlcUAT-I) | 37 kDa  | 0.26 | 9   | 1  | 8  | 0 | 0 | 0 | 1  | 2  | 1  | 2  | 3  | 4.603300025 | 95% (0.013)     |
| Q6FIG4_HUMAN (+1) | COQ9_HUMAN   | COQ9    | O75208 | Ubiquinone biosynthesis protein COQ9, mitochondrial                                                                                                                                                                         | 36 kDa  | 0.51 | 9   | 1  | 8  | 1 | 0 | 0 | 0  | 6  | 0  | 2  | 0  | 4.603300025 | 95% (0.013)     |
| B4E2W0_HUMAN (+1) | B4E1G6_HUMAN | GALK1   | B4E1G6 | Galactokinase (Galactokinase 1) (cDNA FLJ56840, highly similar to Galactokinase (EC 2.7.1.6))                                                                                                                               | 45 kDa  | 0.39 | 9   | 1  | 8  | 0 | 1 | 0 | 0  | 0  | 6  | 2  | 0  | 4.603300025 | 95% (0.013)     |
| UGGG1_HUMAN       | FPFS_HUMAN   | FDPS    | P14324 | Farnesyl pyrophosphate synthase (FPP synthase) (FPS) (EC 2.5.1.10) ((2E,6E)-farnesyl diphosphate synthase) (Dimethylallyltransferase) (EC 2.5.1.1) (Farnesyl diphosphate synthase) (Geranyltransferase)                     | 48 kDa  | 0.24 | 9   | 1  | 8  | 0 | 1 | 0 | 0  | 7  | 0  | 1  | 0  | 4.603300025 | 95% (0.013)     |
| A8K486_HUMAN (+1) | E1NZA1_HUMAN | PRIC295 | E1NZA1 | Peroxisome proliferator activated receptor interacting complex protein                                                                                                                                                      | 293 kDa | 0.58 | 110 | 21 | 90 | 4 | 2 | 2 | 13 | 40 | 38 | 12 | 2  | 4.596358964 | 95% (< 0.00010) |
| CMC2_HUMAN (+1)   | WDR75_HUMAN  | WDR75   | Q8IWA0 | WD repeat-containing protein 75                                                                                                                                                                                             | 95 kDa  | 0.4  | 14  | 2  | 12 | 0 | 2 | 0 | 0  | 9  | 0  | 3  | 0  | 4.565222997 | 95% (0.0035)    |
| MAOM_HUMAN        | CH3L1_HUMAN  | CHI3L1  | P36222 | Chitinase-3-like protein 1 (39 kDa synovial protein) (Cartilage glycoprotein 39) (CGP-39) (GP-39) (hCGP-39) (YKL-40)                                                                                                        | 43 kDa  | 0.44 | 29  | 5  | 24 | 3 | 1 | 0 | 1  | 2  | 1  | 3  | 18 | 4.524484335 | 95% (< 0.00010) |
| A2A274_HUMAN (+3) | ALAT2_HUMAN  | GPT2    | Q8TD30 | Alanine aminotransferase 2 (ALT2) (EC 2.6.1.2) (Glutamate pyruvate transaminase 2) (GPT 2) (Glutamic--alanine transaminase 2) (Glutamic--pyruvic transaminase 2)                                                            | 58 kDa  | 0.36 | 29  | 5  | 24 | 0 | 1 | 1 | 3  | 14 | 9  | 1  | 0  | 4.524484335 | 95% (< 0.00010) |
| B4DIT7_HUMAN (+1) | PXDN_HUMAN   | PXDN    | Q92626 | Peroxidase homolog (EC 1.1.1.7) (Melanoma-associated antigen MG50) (Vascular peroxidase 1) (p53-responsive gene 2 protein)                                                                                                  | 165 kDa | 0.37 | 23  | 4  | 19 | 4 | 0 | 0 | 0  | 10 | 1  | 2  | 6  | 4.319443352 | 95% (0.00051)   |
| RAB2A_HUMAN       | ABCE1_HUMAN  | ABCE1   | P61221 | ATP-binding cassette sub-family E member 1 (2'-5'-oligoadenylate-binding protein) (HuHP68) (RNase L inhibitor) (Ribonuclease 4 inhibitor) (RNS41)                                                                           | 67 kDa  | 0.68 | 17  | 3  | 15 | 0 | 0 | 0 | 3  | 7  | 4  | 4  | 0  | 4.281609737 | 95% (0.0018)    |
| K7EKI8_HUMAN (+1) | RDH10_HUMAN  | RDH10   | Q8IZV5 | Retinol dehydrogenase 10 (EC 1.1.1.300)                                                                                                                                                                                     | 38 kDa  | 0.35 | 13  | 2  | 11 | 1 | 0 | 1 | 0  | 0  | 9  | 1  | 1  | 4.220617143 | 95% (0.0064)    |

|                   |              |               |        |                                                                                                                                                                                                                        |         |      |    |   |    |   |   |   |   |   |   |   |    |             |              |
|-------------------|--------------|---------------|--------|------------------------------------------------------------------------------------------------------------------------------------------------------------------------------------------------------------------------|---------|------|----|---|----|---|---|---|---|---|---|---|----|-------------|--------------|
| FAS_HUMAN         | PGLT1_HUMAN  | POGLUT1       | Q8NBL1 | Protein O-glucosyltransferase 1 (EC 2.4.1.-) (CAP10-like 46 kDa protein) (hCLP46) (KTEL motif-containing protein 1) (Myelodysplastic syndromes relative protein)                                                       | 46 kDa  | 0.25 | 20 | 4 | 18 | 0 | 2 | 1 | 1 | 8 | 4 | 2 | 5  | 4.106078428 | 95% (0.0090) |
| NUCL_HUMAN        | CSN5_HUMAN   | COP5          | Q92905 | COP9 signalosome complex subunit 5 (SGN5) (Signalosome subunit 5) (EC 3.4.-.-) (Jun activation domain-binding protein 1)                                                                                               | 38 kDa  | 0.21 | 8  | 1 | 7  | 0 | 0 | 0 | 1 | 4 | 1 | 2 | 0  | 4.105586905 | 95% (0.024)  |
| HNRPM_HUMAN       | B7Z5H3_HUMAN | MAOB          | B7Z5H3 | Amine oxidase [flavin-containing] B (cDNA FLJ52418, highly similar to Amine oxidase [flavin-containing] B (EC 1.4.3.4))                                                                                                | 47 kDa  | 0.33 | 8  | 1 | 7  | 0 | 0 | 0 | 1 | 0 | 7 | 0 | 0  | 4.105586905 | 95% (0.024)  |
| LDHA_HUMAN        | NUDC_HUMAN   | NUDC          | Q9Y266 | Nuclear migration protein nudC (Nuclear distribution protein C homolog)                                                                                                                                                | 38 kDa  | 0.47 | 8  | 1 | 7  | 0 | 0 | 0 | 1 | 5 | 0 | 2 | 0  | 4.105586905 | 95% (0.024)  |
| Q59GL1_HUMAN      | HPT_HUMAN    | HP            | P00738 | Haptoglobin (Zonulin) [Cleaved into: Haptoglobin alpha chain; Haptoglobin beta chain]                                                                                                                                  | 45 kDa  | 0.31 | 16 | 3 | 14 | 0 | 2 | 0 | 1 | 0 | 2 | 5 | 6  | 4.01806825  | 95% (0.0032) |
| AMPL_HUMAN        | A8KA19_HUMAN |               | A8KA19 | cDNA FLJ75831, highly similar to Homo sapiens exportin, tRNA (nuclear export receptor for tRNAs) (XPOT), mRNA                                                                                                          | 110 kDa | 0.47 | 12 | 2 | 10 | 0 | 1 | 0 | 1 | 4 | 4 | 2 | 0  | 3.876021205 | 95% (0.012)  |
| MVP_HUMAN         | NTPCR_HUMAN  | NTPCR         | Q9BSD7 | Cancer-related nucleoside-triphosphatase (NTPase) (EC 3.6.1.15) (Nucleoside triphosphate phosphohydrolase)                                                                                                             | 21 kDa  | 0.36 | 12 | 2 | 10 | 2 | 0 | 0 | 0 | 1 | 2 | 0 | 7  | 3.876021205 | 95% (0.012)  |
| B4DY09_HUMAN (+2) | SAFB2_HUMAN  | SAFB2         | Q14151 | Scaffold attachment factor B2 (SAF-B2)                                                                                                                                                                                 | 107 kDa | 0.29 | 12 | 2 | 10 | 2 | 0 | 0 | 0 | 6 | 0 | 2 | 2  | 3.876021205 | 95% (0.012)  |
| A6NN80_HUMAN (+2) | CO9_HUMAN    | C9            | P02748 | Complement component C9 [Cleaved into: Complement component C9a; Complement component C9b]                                                                                                                             | 63 kDa  | 0.39 | 12 | 2 | 10 | 0 | 0 | 0 | 2 | 0 | 0 | 0 | 10 | 3.876021205 | 95% (0.012)  |
| PABP1_HUMAN       | ACPM_HUMAN   | NDUFAB1       | O14561 | Acyl carrier protein, mitochondrial (ACP) (CI-SDAP) (NADH-ubiquinone oxidoreductase 9.6 kDa subunit)                                                                                                                   | 17 kDa  | 0.28 | 3  | 0 | 3  | 0 | 0 | 0 | 1 | 3 | 0 | 0 | 0  | 3.806828619 | 0% (0.10)    |
| DLDH_HUMAN        | E9PPN3_HUMAN | SCYL1         | E9PPN3 | N-terminal kinase-like protein                                                                                                                                                                                         | 74 kDa  | 0.32 | 3  | 0 | 3  | 0 | 0 | 0 | 0 | 0 | 3 | 0 | 0  | 3.806828619 | 0% (0.10)    |
| ITPR3_HUMAN       | GLE1_HUMAN   | GLE1          | Q53GS7 | Nucleoporin GLE1 (hGLE1) (GLE1-like protein)                                                                                                                                                                           | 80 kDa  | 0.21 | 3  | 0 | 3  | 0 | 0 | 0 | 0 | 0 | 0 | 3 | 0  | 3.806828619 | 0% (0.10)    |
| PRP8_HUMAN        | MDC1_HUMAN   | MDC1          | Q14676 | Mediator of DNA damage checkpoint protein 1 (Nuclear factor with BRCT domains 1)                                                                                                                                       | 227 kDa | 0.17 | 3  | 0 | 3  | 0 | 0 | 0 | 0 | 0 | 0 | 3 | 0  | 3.806828619 | 0% (0.10)    |
| ALDH2_HUMAN (+1)  | B7Z7F0_HUMAN |               | B7Z7F0 | cDNA FLJ56420, highly similar to Aspartyl aminopeptidase (EC 3.4.11.21)                                                                                                                                                | 54 kDa  | 0.35 | 3  | 0 | 3  | 0 | 0 | 0 | 0 | 0 | 3 | 0 | 0  | 3.806828619 | 0% (0.10)    |
| DESP_HUMAN        | IPO8_HUMAN   | IPO8          | O15397 | Importin-8 (Imp8) (Ran-binding protein 8) (RanBP8)                                                                                                                                                                     | 120 kDa | 0.12 | 3  | 0 | 3  | 0 | 0 | 0 | 0 | 2 | 0 | 1 | 0  | 3.806828619 | 0% (0.10)    |
| K7EJEB_HUMAN (+1) | ABCF2_HUMAN  | ABCF2         | Q9UG63 | ATP-binding cassette sub-family F member 2 (iron-inhibited ABC transporter 2)                                                                                                                                          | 71 kDa  | 0.38 | 3  | 0 | 3  | 0 | 0 | 0 | 0 | 0 | 2 | 1 | 0  | 3.806828619 | 0% (0.10)    |
| XRCC5_HUMAN       | A4D212_HUMAN | DKFZP586J0619 | A4D212 | DKFZP586J0619 protein (Integrator complex subunit 1)                                                                                                                                                                   | 266 kDa | 0.28 | 3  | 0 | 3  | 0 | 0 | 0 | 0 | 0 | 0 | 3 | 0  | 3.806828619 | 0% (0.10)    |
| AL7A1_HUMAN       | B3KM36_HUMAN |               | B3KM36 | cDNA FLJ10153 fis, clone HEMBA1003417, highly similar to BAG family molecular chaperone regulator 2                                                                                                                    | 24 kDa  | 0.39 | 3  | 0 | 3  | 0 | 0 | 0 | 0 | 0 | 3 | 0 | 0  | 3.806828619 | 0% (0.10)    |
| ANX11_HUMAN (+1)  | B3KQV7_HUMAN | SLC29A1       | B3KQV7 | Equilibrative nucleoside transporter 1 (Solute carrier family 29 (Nucleoside transporters), member 1, isoform CRA_b) (cDNA FLJ33172 fis, clone ADRGL2002029, highly similar to Equilibrative nucleoside transporter 1) | 59 kDa  | 0.37 | 3  | 0 | 3  | 0 | 0 | 0 | 0 | 1 | 1 | 1 | 0  | 3.806828619 | 0% (0.10)    |
| B2R6E5_HUMAN (+2) | DDX54_HUMAN  | DDX54         | Q8TDD1 | ATP-dependent RNA helicase DDX54 (EC 3.6.4.13) (ATP-dependent RNA helicase DP97) (DEAD box RNA                                                                                                                         | 99 kDa  | 0.24 | 3  | 0 | 3  | 0 | 0 | 0 | 0 | 0 | 0 | 3 | 0  | 3.806828619 | 0% (0.10)    |

|                  |              |               |        |                                                                                                                                                                                                                                                                                                         |         |      |   |   |   |   |   |   |   |   |   |   |   |   |             |             |           |
|------------------|--------------|---------------|--------|---------------------------------------------------------------------------------------------------------------------------------------------------------------------------------------------------------------------------------------------------------------------------------------------------------|---------|------|---|---|---|---|---|---|---|---|---|---|---|---|-------------|-------------|-----------|
|                  |              |               |        | helicase 97 kDa) (DEAD box protein 54)                                                                                                                                                                                                                                                                  |         |      |   |   |   |   |   |   |   |   |   |   |   |   |             |             |           |
| EF2_HUMAN        | E7ESL0_HUMAN | MRPL22        | E7ESL0 | 39S ribosomal protein L22, mitochondrial                                                                                                                                                                                                                                                                | 24 kDa  | 0.3  | 3 | 0 | 3 | 0 | 0 | 0 | 0 | 0 | 2 | 0 | 0 | 0 | 1           | 3.806828619 | 0% (0.10) |
| A8K590_HUMAN(+3) | B4DZK0_HUMAN |               | B4DZK0 | cDNA FLJ56391, highly similar to Cysteine protease ATG4B (EC 3.4.22.-)                                                                                                                                                                                                                                  | 57 kDa  | 0.34 | 3 | 0 | 3 | 0 | 0 | 0 | 0 | 0 | 1 | 2 | 0 | 0 | 0           | 3.806828619 | 0% (0.10) |
| B7Z992_HUMAN     | A8K8C2_HUMAN |               | A8K8C2 | cDNA FLJ76932, highly similar to Homo sapiens tubulin-specific chaperone e (TBCE), mRNA                                                                                                                                                                                                                 | 59 kDa  | 0.25 | 3 | 0 | 3 | 0 | 0 | 0 | 0 | 0 | 3 | 0 | 0 | 0 | 0           | 3.806828619 | 0% (0.10) |
| MOES_HUMAN       | Q658W7_HUMAN | DKFZp666L2010 | Q658W7 | Putative uncharacterized protein DKFZp666L2010 (Fragment)                                                                                                                                                                                                                                               | 92 kDa  | 0.29 | 3 | 0 | 3 | 0 | 0 | 0 | 0 | 0 | 0 | 3 | 0 | 0 | 0           | 3.806828619 | 0% (0.10) |
| QCR2_HUMAN       | B7Z7N6_HUMAN | PKD1          | B7Z7N6 | [Pyruvate dehydrogenase (acetyl-transferring)] kinase isozyme 1, mitochondrial (cDNA FLJ51565, highly similar to Pyruvate dehydrogenase (lipoamide) kinase isozyme 1 (EC 2.7.11.2))                                                                                                                     | 41 kDa  | 0.37 | 3 | 0 | 3 | 0 | 0 | 0 | 0 | 2 | 0 | 0 | 0 | 1 | 3.806828619 | 0% (0.10)   |           |
| GSTK1_HUMAN      | DDX56_HUMAN  | DDX56         | Q9NY93 | Probable ATP-dependent RNA helicase DDX56 (EC 3.6.4.13) (ATP-dependent 61 kDa nuclear RNA helicase) (DEAD box protein 21) (DEAD box protein 56)                                                                                                                                                         | 62 kDa  | 0.43 | 3 | 0 | 3 | 0 | 0 | 0 | 0 | 1 | 0 | 1 | 0 | 0 | 0           | 3.806828619 | 0% (0.10) |
| B9A067_HUMAN(+1) | MRRP3_HUMAN  | KIAA0391      | O15091 | Mitochondrial ribonuclease P protein 3 (Mitochondrial RNase P protein 3)                                                                                                                                                                                                                                | 67 kDa  | 0.34 | 3 | 0 | 3 | 0 | 0 | 0 | 0 | 3 | 0 | 0 | 0 | 0 | 0           | 3.806828619 | 0% (0.10) |
| COPA_HUMAN       | H0YEE1_HUMAN | VPS51         | H0YEE1 | Vacuolar protein sorting-associated protein 51 homolog (Fragment)                                                                                                                                                                                                                                       | 22 kDa  | 0.27 | 3 | 0 | 3 | 0 | 0 | 0 | 0 | 1 | 1 | 1 | 0 | 0 | 0           | 3.806828619 | 0% (0.10) |
| ECHM_HUMAN       | BRCC3_HUMAN  | BRCC3         | P46736 | Lys-63-specific deubiquitinase BRCC36 (EC 3.4.19.-) (BRCA1-A complex subunit BRCC36) (BRCA1/BRCA2-containing complex subunit 3) (BRCA1/BRCA2-containing complex subunit 36) (BRISC complex subunit BRCC36)                                                                                              | 36 kDa  | 0.54 | 3 | 0 | 3 | 0 | 0 | 0 | 0 | 0 | 3 | 0 | 0 | 0 | 0           | 3.806828619 | 0% (0.10) |
| ERO1A_HUMAN      | Q7Z524_HUMAN |               | Q7Z524 | HUMEEP                                                                                                                                                                                                                                                                                                  | 51 kDa  | 0.27 | 3 | 0 | 3 | 0 | 0 | 0 | 0 | 1 | 1 | 1 | 0 | 0 | 0           | 3.806828619 | 0% (0.10) |
| HSPB1_HUMAN      | A8K6N3_HUMAN |               | A8K6N3 | cDNA FLJ76886, highly similar to Homo sapiens loss of heterozygosity, 11, chromosomal region 2, gene A (LOH11CR2A), transcript variant 1, mRNA                                                                                                                                                          | 87 kDa  | 0.54 | 3 | 0 | 3 | 0 | 0 | 0 | 0 | 0 | 3 | 0 | 0 | 0 | 0           | 3.806828619 | 0% (0.10) |
| B4E380_HUMAN     | B7SBB1_HUMAN | AIP           | B7SBB1 | Aryl hydrocarbon receptor interacting protein                                                                                                                                                                                                                                                           | 38 kDa  | 0.39 | 3 | 0 | 3 | 0 | 0 | 0 | 0 | 0 | 3 | 0 | 0 | 0 | 0           | 3.806828619 | 0% (0.10) |
| OST48_HUMAN      | UBA7_HUMAN   | UBA7          | P41226 | Ubiquitin-like modifier-activating enzyme 7 (Ubiquitin-activating enzyme 7) (D8) (Ubiquitin-activating enzyme E1 homolog)                                                                                                                                                                               | 112 kDa | 0.27 | 3 | 0 | 3 | 0 | 0 | 0 | 0 | 0 | 3 | 0 | 0 | 0 | 0           | 3.806828619 | 0% (0.10) |
| F5H897_HUMAN(+2) | A2IDC6_HUMAN | MRPL28        | A2IDC6 | 39S ribosomal protein L28, mitochondrial (Fragment)                                                                                                                                                                                                                                                     | 29 kDa  | 0.38 | 3 | 0 | 3 | 0 | 0 | 0 | 0 | 1 | 0 | 0 | 2 | 0 | 0           | 3.806828619 | 0% (0.10) |
| ODO1_HUMAN       | B3KY51_HUMAN |               | B3KY51 | cDNA FLJ46863 fis, clone UTERU3011558                                                                                                                                                                                                                                                                   | 78 kDa  | 0.27 | 3 | 0 | 3 | 0 | 0 | 0 | 0 | 3 | 0 | 0 | 0 | 0 | 0           | 3.806828619 | 0% (0.10) |
| PRDX1_HUMAN      | H7C189_HUMAN | USP4          | H7C189 | Ubiquitin carboxyl-terminal hydrolase (EC 3.4.19.12) (Fragment)                                                                                                                                                                                                                                         | 70 kDa  | 0.45 | 3 | 0 | 3 | 0 | 0 | 0 | 0 | 0 | 4 | 0 | 0 | 0 | 0           | 3.806828619 | 0% (0.10) |
| B4DWS6_HUMAN(+1) | INT5_HUMAN   | INTS5         | Q6P9B9 | Integrator complex subunit 5 (Int5)                                                                                                                                                                                                                                                                     | 108 kDa | 0.39 | 3 | 0 | 3 | 0 | 0 | 0 | 0 | 0 | 0 | 2 | 1 | 0 | 0           | 3.806828619 | 0% (0.10) |
| E7ENR4_HUMAN     | PHS_HUMAN    | PCBD1         | P61457 | Pterin-4-alpha-carbinolamine dehydratase (PHS) (EC 4.2.1.96) (4-alpha-hydroxytetrahydropterin dehydratase) (Dimerization cofactor of hepatocyte nuclear factor 1-alpha) (DCoH) (Dimerization cofactor of HNF1) (Phenylalanine hydroxylase-stimulating protein) (Pterin carbinolamine dehydratase) (PCD) | 12 kDa  | 0.3  | 2 | 0 | 3 | 0 | 0 | 0 | 0 | 0 | 0 | 2 | 0 | 0 | 0           | 3.806828619 | 0% (0.10) |

|                   |              |         |        |                                                                                                                                                                                                                                                                        |         |       |    |    |    |   |   |   |   |    |    |    |    |             |                 |
|-------------------|--------------|---------|--------|------------------------------------------------------------------------------------------------------------------------------------------------------------------------------------------------------------------------------------------------------------------------|---------|-------|----|----|----|---|---|---|---|----|----|----|----|-------------|-----------------|
| UBA1_HUMAN        | B7Z2F7_HUMAN |         | B7Z2F7 | cDNA FLJ54655, highly similar to Heat shock 70 kDa protein 12A                                                                                                                                                                                                         | 66 kDa  | 0.25  | 2  | 0  | 3  | 0 | 0 | 0 | 0 | 0  | 2  | 0  | 0  | 3.806828619 | 0% (0.10)       |
| A8K525_HUMAN (+1) | CASP6_HUMAN  | CASP6   | P55212 | Caspase-6 (CASP-6) (EC 3.4.22.59) (Apoptotic protease Mch-2) [Cleaved into: Caspase-6 subunit p18; Caspase-6 subunit p11]                                                                                                                                              | 33 kDa  | 0.27  | 3  | 0  | 3  | 0 | 0 | 0 | 0 | 0  | 3  | 0  | 0  | 3.806828619 | 0% (0.10)       |
| PROF1_HUMAN       | GATC_HUMAN   | GATC    | O43716 | Glutamyl-tRNA(Gln) amidotransferase subunit C, mitochondrial (Glu-AdT subunit C) (EC 6.3.5.-) (Protein 15E1.2)                                                                                                                                                         | 15 kDa  | 0.73  | 3  | 0  | 3  | 0 | 0 | 0 | 0 | 2  | 0  | 0  | 1  | 3.806828619 | 0% (0.10)       |
| A8KAP3_HUMAN (+5) | HID1_HUMAN   | HID1    | Q8IV36 | Protein HID1 (Down-regulated in multiple cancers 1) (HID1 domain-containing protein) (Protein hid-1 homolog)                                                                                                                                                           | 89 kDa  | 0.31  | 3  | 0  | 3  | 0 | 0 | 0 | 0 | 2  | 1  | 0  | 0  | 3.806828619 | 0% (0.10)       |
| AMPN_HUMAN (+1)   | F8VWL0_HUMAN | TFCP2   | F8VWL0 | Alpha-globin transcription factor CP2 (Fragment)                                                                                                                                                                                                                       | 44 kDa  | 0.28  | 3  | 0  | 3  | 0 | 0 | 0 | 0 | 1  | 1  | 1  | 0  | 3.806828619 | 0% (0.10)       |
| HNRPL_HUMAN (+1)  | A6ND99_HUMAN | HS2ST1  | A6ND99 | Heparan sulfate 2-O-sulfotransferase 1                                                                                                                                                                                                                                 | 37 kDa  | 0.25  | 3  | 0  | 3  | 0 | 0 | 0 | 0 | 2  | 0  | 1  | 0  | 3.806828619 | 0% (0.10)       |
| ROA3_HUMAN        | ELP1_HUMAN   | IKBKAP  | O95163 | Elongator complex protein 1 (ELP1) (IkappaB kinase complex-associated protein) (IKK complex-associated protein) (p150)                                                                                                                                                 | 150 kDa | 0.36  | 3  | 0  | 3  | 0 | 0 | 0 | 0 | 3  | 0  | 0  | 0  | 3.806828619 | 0% (0.10)       |
| SF3B3_HUMAN       | B2R533_HUMAN |         | B2R533 | cDNA, FLJ92520, highly similar to Homo sapiens glutathione S-transferase theta 2 (GSTT2), mRNA                                                                                                                                                                         | 28 kDa  | 0.27  | 3  | 0  | 3  | 0 | 0 | 0 | 0 | 3  | 0  | 0  | 0  | 3.806828619 | 0% (0.10)       |
| C9J9K3_HUMAN (+1) | B3KRF9_HUMAN |         | B3KRF9 | cDNA FLJ34156, clone FCBBF3013266, highly similar to Tsukushi (Leucine-rich repeat-containing protein 54)                                                                                                                                                              | 34 kDa  | 0.45  | 3  | 0  | 3  | 0 | 0 | 0 | 0 | 0  | 3  | 0  | 0  | 3.806828619 | 0% (0.10)       |
| I3LIP8_HUMAN      | G3V4W4_HUMAN | GNPNAT1 | G3V4W4 | Glucosamine 6-phosphate N-acetyltransferase (Fragment)                                                                                                                                                                                                                 | 18 kDa  | 0.46  | 3  | 0  | 3  | 0 | 0 | 0 | 0 | 3  | 0  | 0  | 0  | 3.806828619 | 0% (0.10)       |
| Q59GY2_HUMAN      | PCH2_HUMAN   | TRIP13  | Q15645 | Pachytene checkpoint protein 2 homolog (Human papillomavirus type 16 E1 protein-binding protein) (16E1-BP) (HPV16 E1 protein-binding protein) (Thyroid hormone receptor interactor 13) (Thyroid receptor-interacting protein 13) (TR-interacting protein 13) (TRIP-13) | 49 kDa  | 0.28  | 3  | 0  | 3  | 0 | 0 | 0 | 0 | 3  | 0  | 0  | 0  | 3.806828619 | 0% (0.10)       |
| AATM_HUMAN (+1)   | A8K329_HUMAN |         | A8K329 | cDNA FLJ76656, highly similar to Homo sapiens scaffold attachment factor B (SAFB), mRNA                                                                                                                                                                                | 103 kDa | 0.37  | 16 | 3  | 13 | 1 | 1 | 0 | 1 | 7  | 0  | 3  | 3  | 3.754534347 | 95% (0.0056)    |
| STT3A_HUMAN       | A8K454_HUMAN |         | A8K454 | cDNA FLJ78187, highly similar to Homo sapiens calmeffin, mRNA                                                                                                                                                                                                          | 70 kDa  | 0.17  | 37 | 8  | 29 | 4 | 0 | 0 | 0 | 9  | 9  | 6  | 6  | 3.66256952  | 95% (< 0.00010) |
| E9PCY7_HUMAN (+2) | TOP2A_HUMAN  | TOP2A   | P11388 | DNA topoisomerase 2-alpha (EC 5.99.1.3) (DNA topoisomerase II, alpha isozyme)                                                                                                                                                                                          | 174 kDa | 0.26  | 88 | 20 | 68 | 0 | 9 | 9 | 2 | 26 | 18 | 14 | 10 | 3.651236066 | 95% (< 0.00010) |
| RAB14_HUMAN       | B4DQ14_HUMAN | EIF2A   | B4DQ14 | Eukaryotic translation initiation factor 2A (cDNA FLJ58035, highly similar to Homo sapiens eukaryotic translation initiation factor (eIF) 2A (eIF2A), mRNA)                                                                                                            | 62 kDa  | 0.63  | 7  | 1  | 6  | 0 | 0 | 0 | 1 | 3  | 3  | 1  | 0  | 3.607888104 | 95% (0.045)     |
| B2ZDQ1_HUMAN (+1) | RT05_HUMAN   | MRPS5   | P82675 | 28S ribosomal protein S5, mitochondrial (MRP-S5) (S5m)                                                                                                                                                                                                                 | 48 kDa  | 0.49  | 7  | 1  | 6  | 1 | 0 | 0 | 0 | 1  | 0  | 1  | 4  | 3.607888104 | 95% (0.045)     |
| B4DUQ1_HUMAN      | B4DMJ9_HUMAN |         | B4DMJ9 | cDNA FLJ60022, highly similar to DnaJ homolog subfamily B member 6                                                                                                                                                                                                     | 24 kDa  | 0.4   | 7  | 1  | 6  | 1 | 0 | 0 | 0 | 2  | 1  | 1  | 2  | 3.607888104 | 95% (0.045)     |
| EPIPL_HUMAN       | EI2BA_HUMAN  | EIF2B1  | Q14232 | Translation initiation factor eIF-2B subunit alpha (eIF-2B GDP-GTP exchange factor subunit alpha)                                                                                                                                                                      | 34 kDa  | 0.081 | 7  | 1  | 6  | 0 | 0 | 0 | 1 | 3  | 3  | 0  | 0  | 3.607888104 | 95% (0.045)     |
| ANXA4_HUMAN (+1)  | SYAM_HUMAN   | AARS2   | Q5JTZ9 | Alanine-tRNA ligase, mitochondrial (EC 6.1.1.7) (Alanyl-tRNA synthetase) (AlaRS)                                                                                                                                                                                       | 107 kDa | 0.5   | 7  | 1  | 6  | 1 | 0 | 0 | 0 | 5  | 0  | 0  | 1  | 3.607888104 | 95% (0.045)     |

|                   |              |              |        |                                                                                                                                                                                                                                                                                    |         |      |     |    |    |   |   |   |   |    |    |    |    |             |                 |
|-------------------|--------------|--------------|--------|------------------------------------------------------------------------------------------------------------------------------------------------------------------------------------------------------------------------------------------------------------------------------------|---------|------|-----|----|----|---|---|---|---|----|----|----|----|-------------|-----------------|
| SYIM_HUMAN        | F210A_HUMAN  | FAM210A      | Q96ND0 | Protein FAM210A                                                                                                                                                                                                                                                                    | 31 kDa  | 0.29 | 7   | 1  | 6  | 0 | 0 | 1 | 0 | 1  | 2  | 2  | 1  | 3.607888104 | 95% (0.045)     |
| H3BLZ8_HUMAN (+1) | B4DU97_HUMAN | SLC25A17     | B4DU97 | Peroxisomal membrane protein PMP34 (cDNA FLJ57596, highly similar to Peroxisomal membrane protein PMP34)                                                                                                                                                                           | 31 kDa  | 0.28 | 7   | 1  | 6  | 0 | 1 | 0 | 0 | 2  | 4  | 0  | 0  | 3.607888104 | 95% (0.045)     |
| A8K7F6_HUMAN (+1) | VIR_HUMAN    | KIAA1429     | Q69YN4 | Protein virilizer homolog                                                                                                                                                                                                                                                          | 202 kDa | 0.39 | 11  | 2  | 9  | 0 | 1 | 1 | 0 | 2  | 0  | 7  | 0  | 3.531435181 | 95% (0.021)     |
| AIFM1_HUMAN       | PCCA_HUMAN   | PCCA         | P05165 | Propionyl-CoA carboxylase alpha chain, mitochondrial (PCCase subunit alpha) (EC 6.4.1.3) (Propanoyl-CoA:carbon dioxide ligase subunit alpha)                                                                                                                                       | 80 kDa  | 0.33 | 11  | 2  | 9  | 0 | 0 | 1 | 1 | 3  | 0  | 1  | 5  | 3.531435181 | 95% (0.021)     |
| B2RBR9_HUMAN (+1) | MMS19_HUMAN  | MMS19        | Q96T76 | MMS19 nucleotide excision repair protein homolog (hMMS19) (MET18 homolog) (MMS19-like protein)                                                                                                                                                                                     | 113 kDa | 0.27 | 10  | 2  | 9  | 0 | 0 | 0 | 2 | 2  | 5  | 1  | 0  | 3.531435181 | 95% (0.021)     |
| B4DE36_HUMAN (+1) | FA98A_HUMAN  | FAM98A       | Q8NCA5 | Protein FAM98A                                                                                                                                                                                                                                                                     | 55 kDa  | 0.3  | 11  | 2  | 9  | 0 | 0 | 0 | 2 | 3  | 3  | 1  | 2  | 3.531435181 | 95% (0.021)     |
| B7Z8A2_HUMAN (+1) | SYAC_HUMAN   | AARS         | P49588 | Alanine-tRNA ligase, cytoplasmic (EC 6.1.1.7) (Alanyl-tRNA synthetase) (AlaRS) (Renal carcinoma antigen NY-REN-42)                                                                                                                                                                 | 107 kDa | 0.39 | 49  | 11 | 37 | 0 | 2 | 4 | 5 | 15 | 18 | 6  | 0  | 3.497283516 | 95% (< 0.00010) |
| PLSL_HUMAN (+1)   | Q59FH1_HUMAN |              | Q59FH1 | Transformation/transcription domain-associated protein variant (Fragment)                                                                                                                                                                                                          | 406 kDa | 0.47 | 15  | 3  | 12 | 1 | 0 | 0 | 2 | 2  | 0  | 9  | 1  | 3.491008026 | 95% (0.0098)    |
| GNAI2_HUMAN       | AAPK1_HUMAN  | PRKAA1       | Q13131 | 5'-AMP-activated protein kinase catalytic subunit alpha-1 (AMPK subunit alpha-1) (EC 2.7.11.1) (Acetyl-CoA carboxylase kinase) (ACACA kinase) (EC 2.7.11.27) (Hydroxymethylglutaryl-CoA reductase kinase) (HMGCR kinase) (EC 2.7.11.31) (Tau-protein kinase PRKAA1) (EC 2.7.11.26) | 64 kDa  | 0.4  | 15  | 3  | 12 | 0 | 2 | 1 | 0 | 5  | 5  | 2  | 0  | 3.491008026 | 95% (0.0098)    |
| P4HA1_HUMAN       | B9A018_HUMAN | USP39        | B9A018 | U4/U6.U5 tri-snRNP-associated protein 2                                                                                                                                                                                                                                            | 62 kDa  | 0.43 | 15  | 3  | 12 | 1 | 0 | 2 | 0 | 0  | 0  | 11 | 1  | 3.491008026 | 95% (0.0098)    |
| 3HIDH_HUMAN       | UN45A_HUMAN  | UNC45A       | Q9H3U1 | Protein unc-45 homolog A (Unc-45A) (GCUNC-45) (Smooth muscle cell-associated protein 1) (SMAP-1)                                                                                                                                                                                   | 103 kDa | 0.33 | 19  | 4  | 15 | 0 | 0 | 0 | 4 | 2  | 8  | 4  | 0  | 3.466020492 | 95% (0.0047)    |
| B4DJB4_HUMAN (+2) | B2R769_HUMAN |              | B2R769 | cDNA, FLJ93308, highly similar to Homo sapiens leukocyte-derived arginine aminopeptidase (LRAP), mRNA                                                                                                                                                                              | 110 kDa | 0.35 | 64  | 15 | 49 | 0 | 4 | 5 | 6 | 14 | 1  | 18 | 16 | 3.46394414  | 95% (< 0.00010) |
| B7Z5I7_HUMAN (+2) | E7EUY3_HUMAN | PCCB         | E7EUY3 | Propionyl-CoA carboxylase beta chain, mitochondrial                                                                                                                                                                                                                                | 56 kDa  | 0.32 | 38  | 9  | 29 | 1 | 3 | 2 | 3 | 17 | 1  | 3  | 9  | 3.305203195 | 95% (0.00023)   |
| A7E2Y5_HUMAN (+1) | B2R5W3_HUMAN |              | B2R5W3 | cDNA, FLJ92658, highly similar to Homo sapiens poly (ADP-ribose) polymerase family, member 1 (PARP1), mRNA                                                                                                                                                                         | 113 kDa | 0.17 | 104 | 26 | 78 | 3 | 7 | 8 | 8 | 33 | 23 | 15 | 8  | 3.258673749 | 95% (< 0.00010) |
| PCKGM_HUMAN       | M1V485_HUMAN | SLC34A2-ROS1 | M1V485 | Tyrosine-protein kinase receptor (EC 2.7.10.1)                                                                                                                                                                                                                                     | 141 kDa | 0.32 | 54  | 13 | 40 | 4 | 4 | 2 | 3 | 8  | 1  | 14 | 18 | 3.242292332 | 95% (< 0.00010) |
| HNRL2_HUMAN       | A7J992_HUMAN | PHIP         | A7J992 | Pleckstrin homology domain-interacting protein variant 1                                                                                                                                                                                                                           | 207 kDa | 0.33 | 11  | 2  | 8  | 0 | 1 | 0 | 1 | 4  | 0  | 3  | 1  | 3.186859072 | 95% (0.037)     |
| SPTB2_HUMAN       | B4E0B1_HUMAN |              | B4E0B1 | cDNA FLJ52100                                                                                                                                                                                                                                                                      | 101 kDa | 0.21 | 10  | 2  | 8  | 0 | 1 | 0 | 1 | 6  | 1  | 1  | 0  | 3.186859072 | 95% (0.037)     |
| B5BUB1_HUMAN (+1) | CLP1L_HUMAN  | CLPTM1L      | Q96KA5 | Cleft lip and palate transmembrane protein 1-like protein (CLPTM1-like protein) (Cisplatin resistance-related protein 9) (CRR9)                                                                                                                                                    | 62 kDa  | 0.44 | 10  | 2  | 8  | 0 | 0 | 2 | 0 | 2  | 0  | 4  | 2  | 3.186859072 | 95% (0.037)     |
| CTNA1_HUMAN       | RUFY1_HUMAN  | RUFY1        | Q96T51 | RUN and FYVE domain-containing protein 1 (FYVE-finger protein EIP1) (Lar-binding protein 1) (Rab4-interacting protein) (Zinc                                                                                                                                                       | 80 kDa  | 0.34 | 10  | 2  | 8  | 1 | 0 | 0 | 1 | 3  | 2  | 3  | 0  | 3.186859072 | 95% (0.037)     |



|                   |              |         |        |                                                                                                                                                                                                                                                                 |         |      |    |    |    |   |   |   |   |   |   |    |   |             |               |
|-------------------|--------------|---------|--------|-----------------------------------------------------------------------------------------------------------------------------------------------------------------------------------------------------------------------------------------------------------------|---------|------|----|----|----|---|---|---|---|---|---|----|---|-------------|---------------|
| NB5R3_HUMAN       | B4DY16_HUMAN |         | B4DY16 | cDNA FLJ51385, highly similar to Ran GTPase-activating protein 1                                                                                                                                                                                                | 58 kDa  | 0.31 | 13 | 3  | 10 | 0 | 1 | 0 | 2 | 6 | 2 | 2  | 0 | 2.963978133 | 95% (0.029)   |
| ARP2_HUMAN        | B4DJK9_HUMAN |         | B4DJK9 | Perilipin                                                                                                                                                                                                                                                       | 45 kDa  | 0.35 | 13 | 3  | 10 | 1 | 0 | 1 | 1 | 0 | 1 | 3  | 6 | 2.963978133 | 95% (0.029)   |
| B2R888_HUMAN (+2) | Q6NVV7_HUMAN | KPNA2   | Q6NVV7 | Importin subunit alpha                                                                                                                                                                                                                                          | 58 kDa  | 0.29 | 49 | 13 | 36 | 0 | 3 | 8 | 2 | 5 | 8 | 18 | 5 | 2.927719674 | 95% (0.00016) |
| STAT1_HUMAN       | SON_HUMAN    | SON     | P18583 | Protein SON (Bax antagonist selected in <i>Saccharomyces</i> 1) (BASS1) (Negative regulatory element-binding protein) (NRE-binding protein) (Protein DBP-5) (SON3)                                                                                              | 264 kDa | 0.35 | 20 | 5  | 15 | 0 | 1 | 3 | 1 | 6 | 0 | 6  | 3 | 2.911419805 | 95% (0.011)   |
| A8K4W2_HUMAN (+1) | E7D7X9_HUMAN |         | E7D7X9 | Pyroline-5-carboxylate reductase (EC 1.5.1.2)                                                                                                                                                                                                                   | 33 kDa  | 0.44 | 20 | 5  | 15 | 0 | 2 | 2 | 1 | 5 | 6 | 4  | 0 | 2.911419805 | 95% (0.011)   |
| B2R8N0_HUMAN (+1) | G8JLD3_HUMAN | ERC1    | G8JLD3 | ELKS/Rab6-interacting/CAST family member 1                                                                                                                                                                                                                      | 125 kDa | 0.29 | 2  | 0  | 2  | 0 | 0 | 0 | 0 | 0 | 2 | 0  | 0 | 2.911062362 | 0% (0.22)     |
| A8K4Z4_HUMAN (+1) | B3KXX5_HUMAN |         | B3KXX5 | Structural maintenance of chromosomes protein                                                                                                                                                                                                                   | 144 kDa | 0.31 | 2  | 0  | 2  | 0 | 0 | 0 | 0 | 2 | 0 | 0  | 0 | 2.911062362 | 0% (0.22)     |
| Q96MH4_HUMAN      | CENPF_HUMAN  | CENPF   | P49454 | Centromere protein F (CENPF) (AH antigen) (Kinetochores protein CENPF) (Mitosin)                                                                                                                                                                                | 368 kDa | 0.12 | 2  | 0  | 2  | 0 | 0 | 0 | 0 | 0 | 0 | 2  | 0 | 2.911062362 | 0% (0.22)     |
| Q6PJ75_HUMAN      | CO6A3_HUMAN  | COL6A3  | P12111 | Collagen alpha-3(VI) chain                                                                                                                                                                                                                                      | 344 kDa | 0.27 | 2  | 0  | 2  | 0 | 0 | 0 | 0 | 0 | 0 | 2  | 0 | 2.911062362 | 0% (0.22)     |
| RS3_HUMAN         | C2D1A_HUMAN  | CC2D1A  | Q6P1N0 | Coiled-coil and C2 domain-containing protein 1A (Akt kinase-interacting protein 1) (Five prime repressor element under dual repression-binding protein 1) (FRE under dual repression-binding protein 1) (Freud-1) (Putative NF-kappa-B-activating protein 023N) | 104 kDa | 0.52 | 2  | 0  | 2  | 0 | 0 | 0 | 0 | 2 | 0 | 0  | 0 | 2.911062362 | 0% (0.22)     |
| ETFA_HUMAN        | ARHG2_HUMAN  | ARHGEF2 | Q92974 | Rho guanine nucleotide exchange factor 2 (Guanine nucleotide exchange factor H1) (GEF-H1) (Microtubule-regulated Rho-GEF) (Proliferating cell nuclear antigen p40)                                                                                              | 112 kDa | 0.33 | 2  | 0  | 2  | 0 | 0 | 0 | 0 | 1 | 1 | 0  | 0 | 2.911062362 | 0% (0.22)     |
| ODO2_HUMAN        | B2RCJ6_HUMAN |         | B2RCJ6 | cDNA, FLJ96114, highly similar to Homo sapiens bromodomain and WD repeat domain containing 2 (BRWD2), mRNA                                                                                                                                                      | 137 kDa | 0.21 | 2  | 0  | 2  | 0 | 0 | 0 | 0 | 1 | 1 | 0  | 0 | 2.911062362 | 0% (0.22)     |
| B2RAQ8_HUMAN (+1) | B2R6G5_HUMAN |         | B2R6G5 | cDNA, FLJ92942, highly similar to Homo sapiens T-box, brain, 1 (TBR1), mRNA                                                                                                                                                                                     | 74 kDa  | 0.33 | 2  | 0  | 2  | 0 | 0 | 0 | 0 | 1 | 0 | 0  | 1 | 2.911062362 | 0% (0.22)     |
| NU205_HUMAN       | ADNP_HUMAN   | ADNP    | Q9H2P0 | Activity-dependent neuroprotector homeobox protein (Activity-dependent neuroprotective protein)                                                                                                                                                                 | 124 kDa | 0.15 | 2  | 0  | 2  | 0 | 0 | 0 | 0 | 1 | 0 | 1  | 0 | 2.911062362 | 0% (0.22)     |
| MTCH2_HUMAN       | NEK9_HUMAN   | NEK9    | Q8TD19 | Serine/threonine-protein kinase Nek9 (EC 2.7.11.1) (Neccl kinase) (Never in mitosis A-related kinase 9) (NimA-related protein kinase 9) (NimA-related kinase 8) (Nek8)                                                                                          | 107 kDa | 0.35 | 2  | 0  | 2  | 0 | 0 | 0 | 0 | 1 | 1 | 0  | 0 | 2.911062362 | 0% (0.22)     |
| PYC_HUMAN         | A7E2E5_HUMAN | PDE3B   | A7E2E5 | Phosphodiesterase 3B, cGMP-inhibited                                                                                                                                                                                                                            | 124 kDa | 0.25 | 2  | 0  | 2  | 0 | 0 | 0 | 0 | 0 | 1 | 1  | 0 | 2.911062362 | 0% (0.22)     |
| TPIS_HUMAN        | A8K5G0_HUMAN |         | A8K5G0 | cDNA FLJ76836, highly similar to Homo sapiens splicing factor, arginine/serine-rich 14 (SFRS14), transcript variant 2, mRNA                                                                                                                                     | 120 kDa | 0.56 | 2  | 0  | 2  | 0 | 0 | 0 | 0 | 1 | 0 | 0  | 1 | 2.911062362 | 0% (0.22)     |
| B7ZLE5_HUMAN      | Q59ET0_HUMAN |         | Q59ET0 | Glucan, branching enzyme 1 variant (Fragment)                                                                                                                                                                                                                   | 86 kDa  | 0.2  | 2  | 0  | 2  | 0 | 0 | 0 | 0 | 0 | 2 | 0  | 0 | 2.911062362 | 0% (0.22)     |
| ALDOA_HUMAN (+1)  | PTPRK_HUMAN  | PTPRK   | Q15262 | Receptor-type tyrosine-protein phosphatase kappa (Protein-tyrosine phosphatase kappa) (R-PTP-kappa) (EC 3.1.3.48)                                                                                                                                               | 162 kDa | 0.38 | 2  | 0  | 2  | 0 | 0 | 0 | 0 | 3 | 0 | 0  | 0 | 2.911062362 | 0% (0.22)     |
| FACE1_HUMAN       | FN3K_HUMAN   | FN3K    | Q9H479 | Fructosamine-3-kinase (EC 2.7.1.-)                                                                                                                                                                                                                              | 35 kDa  | 0.24 | 2  | 0  | 2  | 0 | 0 | 0 | 0 | 0 | 2 | 0  | 0 | 2.911062362 | 0% (0.22)     |
| HI2_HUMAN         | B4DZX1_HUMAN |         | B4DZX1 | cDNA FLJ53892, highly similar to Pantothenate kinase 4 (EC 2.7.1.33)                                                                                                                                                                                            | 81 kDa  | 0.36 | 1  | 0  | 2  | 0 | 0 | 0 | 0 | 0 | 2 | 0  | 0 | 2.911062362 | 0% (0.22)     |

|                   |              |         |        |                                                                                                                                                              |         |      |   |   |   |   |   |   |   |   |   |   |   |             |           |
|-------------------|--------------|---------|--------|--------------------------------------------------------------------------------------------------------------------------------------------------------------|---------|------|---|---|---|---|---|---|---|---|---|---|---|-------------|-----------|
| Q59GW8_HUMAN      | DPOD1_HUMAN  | POLD1   | P28340 | DNA polymerase delta catalytic subunit (EC 2.7.7.7) (DNA polymerase subunit delta p125)                                                                      | 124 kDa | 0.3  | 2 | 0 | 2 | 0 | 0 | 0 | 0 | 2 | 0 | 0 | 0 | 2.911062362 | 0% (0.22) |
| A8K2H4_HUMAN (+2) | KIF1A_HUMAN  | KIF1A   | Q12756 | Kinesin-like protein KIF1A (Axonal transporter of synaptic vesicles) (Microtubule-based motor KIF1A) (Unc-104- and KIF1A-related protein) (hUnc-104)         | 191 kDa | 0.3  | 2 | 0 | 2 | 0 | 0 | 0 | 0 | 2 | 0 | 0 | 0 | 2.911062362 | 0% (0.22) |
| D3DSQ1_HUMAN      | TM38B_HUMAN  | TMEM38B | Q9NVV0 | Trimeric intracellular cation channel type B (TRIC-B) (TRICB) (Transmembrane protein 38B)                                                                    | 33 kDa  | 0.21 | 3 | 0 | 2 | 0 | 0 | 0 | 0 | 0 | 0 | 2 | 0 | 2.911062362 | 0% (0.22) |
| B7Z3E5_HUMAN (+2) | B3KUHO_HUMAN |         | B3KUHO | cDNA FLJ39883 fis, clone SPLEN2016268, highly similar to Protein CHMP7                                                                                       | 51 kDa  | 0.23 | 2 | 0 | 2 | 0 | 0 | 0 | 0 | 2 | 0 | 0 | 0 | 2.911062362 | 0% (0.22) |
| NB5R1_HUMAN       | VPS39_HUMAN  | VPS39   | Q96JC1 | Vam6 Vps39-like protein (TRAP1-like protein) (hVam6p)                                                                                                        | 102 kDa | 0.37 | 2 | 0 | 2 | 0 | 0 | 0 | 0 | 2 | 0 | 0 | 0 | 2.911062362 | 0% (0.22) |
| ATPG_HUMAN (+1)   | B4DL80_HUMAN | CDC27   | B4DL80 | Cell division cycle protein 27 homolog (cDNA FLJ57525, highly similar to Cell division cycle protein 27 homolog)                                             | 85 kDa  | 0.34 | 2 | 0 | 2 | 0 | 0 | 0 | 0 | 0 | 1 | 1 | 0 | 2.911062362 | 0% (0.22) |
| Q58F09_HUMAN      | A8K7A1_HUMAN |         | A8K7A1 | cDNA FLJ7346, highly similar to Homo sapiens DEAD (Asp-Glu-Ala-Asp) box polypeptide 49 (DDX49), mRNA                                                         | 54 kDa  | 0.26 | 2 | 0 | 2 | 0 | 0 | 0 | 0 | 0 | 1 | 1 | 0 | 2.911062362 | 0% (0.22) |
| HNRPD_HUMAN       | SPEE_HUMAN   | SRM     | P19623 | Spermidine synthase (SPDSY) (EC 2.5.1.16) (Putrescine aminopropyltransferase)                                                                                | 34 kDa  | 0.25 | 2 | 0 | 2 | 0 | 0 | 0 | 2 | 0 | 0 | 0 | 0 | 2.911062362 | 0% (0.22) |
| B2R7W4_HUMAN (+1) | A8K9V7_HUMAN |         | A8K9V7 | cDNA FLJ77207                                                                                                                                                | 102 kDa | 0.26 | 2 | 0 | 2 | 0 | 0 | 0 | 0 | 0 | 0 | 2 | 0 | 2.911062362 | 0% (0.22) |
| F8W930_HUMAN (+1) | J3QT22_HUMAN | PPME1   | J3QT22 | Protein phosphatase methyltransferase 1 (PME-1) (EC 3.1.1.-)                                                                                                 | 44 kDa  | 0.3  | 2 | 0 | 2 | 0 | 0 | 0 | 0 | 0 | 1 | 1 | 0 | 2.911062362 | 0% (0.22) |
| B2RA56_HUMAN (+1) | HEAT3_HUMAN  | HEATR3  | Q7Z4Q2 | HEAT repeat-containing protein 3                                                                                                                             | 75 kDa  | 0.34 | 2 | 0 | 2 | 0 | 0 | 0 | 0 | 1 | 1 | 0 | 0 | 2.911062362 | 0% (0.22) |
| RL7_HUMAN         | NENF_HUMAN   | NENF    | Q9UMX5 | Neudesin (Cell immortalization-related protein 2) (Neuron-derived neurotrophic factor) (Secreted protein of unknown function) (SPUF protein)                 | 19 kDa  | 0.38 | 2 | 0 | 2 | 0 | 0 | 0 | 0 | 0 | 1 | 0 | 1 | 2.911062362 | 0% (0.22) |
| IPYR2_HUMAN       | HMCS1_HUMAN  | HMGCS1  | Q01581 | Hydroxymethylglutaryl-CoA synthase, cytoplasmic (HMG-CoA synthase) (EC 2.3.3.10) (3-hydroxy-3-methylglutaryl coenzyme A synthase)                            | 57 kDa  | 0.4  | 2 | 0 | 2 | 0 | 0 | 0 | 0 | 2 | 0 | 0 | 0 | 2.911062362 | 0% (0.22) |
| B3KTM6_HUMAN (+1) | A8K0C9_HUMAN |         | A8K0C9 | cDNA FLJ78382, highly similar to Homo sapiens C-terminal modulator protein, transcript variant 2,mRNA                                                        | 12 kDa  | 0.41 | 2 | 0 | 2 | 0 | 0 | 0 | 0 | 2 | 0 | 0 | 0 | 2.911062362 | 0% (0.22) |
| ABCD3_HUMAN       | B4DMK2_HUMAN |         | B4DMK2 | cDNA FLJ57398                                                                                                                                                | 36 kDa  | 0.26 | 2 | 0 | 2 | 0 | 0 | 0 | 0 | 2 | 0 | 0 | 0 | 2.911062362 | 0% (0.22) |
| PML_HUMAN         | A8K097_HUMAN |         | A8K097 | cDNA FLJ78373, highly similar to Homo sapiens PCI domain containing 2, mRNA                                                                                  | 46 kDa  | 0.25 | 2 | 0 | 2 | 0 | 0 | 0 | 0 | 1 | 0 | 1 | 0 | 2.911062362 | 0% (0.22) |
| J3KN69_HUMAN (+1) | MGME1_HUMAN  | MGME1   | Q9BQP7 | Mitochondrial genome maintenance exonuclease 1 (EC 3.1.-.-)                                                                                                  | 39 kDa  | 0.28 | 2 | 0 | 2 | 0 | 0 | 0 | 0 | 2 | 0 | 0 | 1 | 2.911062362 | 0% (0.22) |
| CY24B_HUMAN       | XCT_HUMAN    | SLC7A11 | Q9UPY5 | Cystine/glutamate transporter (Amino acid transport system xc-) (Calcium channel blocker resistance protein CCBR1) (Solute carrier family 7 member 11) (xCT) | 55 kDa  | 0.27 | 2 | 0 | 2 | 0 | 0 | 0 | 0 | 0 | 0 | 0 | 2 | 2.911062362 | 0% (0.22) |
| ACTN1_HUMAN       | PPA6_HUMAN   | ACP6    | Q9NPH0 | Lysophosphatidic acid phosphatase type 6 (EC 3.1.3.2) (Acid phosphatase 6, lysophosphatidic) (Acid phosphatase-like protein 1) (PACPL1)                      | 49 kDa  | 0.48 | 2 | 0 | 2 | 0 | 0 | 0 | 0 | 2 | 0 | 0 | 0 | 2.911062362 | 0% (0.22) |
| C9JZR2_HUMAN (+1) | MP2K3_HUMAN  | MAP2K3  | P46734 | Dual specificity mitogen-activated protein kinase kinase 3 (MAP kinase kinase 3) (MAPKK 3) (EC 2.7.12.2) (MAPK/ERK kinase 3) (MEK)                           | 39 kDa  | 0.2  | 2 | 0 | 2 | 0 | 0 | 0 | 0 | 0 | 2 | 0 | 0 | 2.911062362 | 0% (0.22) |



|                   |              |         |        |                                                                                                                                                                                                                                                                                                                                                                                                                                                                          |         |       |    |   |    |   |   |   |   |   |   |   |   |             |              |
|-------------------|--------------|---------|--------|--------------------------------------------------------------------------------------------------------------------------------------------------------------------------------------------------------------------------------------------------------------------------------------------------------------------------------------------------------------------------------------------------------------------------------------------------------------------------|---------|-------|----|---|----|---|---|---|---|---|---|---|---|-------------|--------------|
|                   |              |         |        | 3) (Stress-activated protein kinase kinase 2) (SAPK kinase 2) (SAPKK-2) (SAPKK2)                                                                                                                                                                                                                                                                                                                                                                                         |         |       |    |   |    |   |   |   |   |   |   |   |   |             |              |
| E5KLL9_HUMAN (+1) | ARMC9_HUMAN  | ARMC9   | Q7Z3E5 | LisH domain-containing protein ARMC9 (Melanoma/melanocyte-specific tumor antigen KUMEL-1) (NS21)                                                                                                                                                                                                                                                                                                                                                                         | 92 kDa  | 0.26  | 2  | 0 | 2  | 0 | 0 | 0 | 0 | 0 | 2 | 0 | 0 | 2.911062362 | 0% (0.22)    |
| KAD4_HUMAN        | AAK1_HUMAN   | AAK1    | Q2M2I8 | AP2-associated protein kinase 1 (EC 2.7.11.1) (Adaptor-associated kinase 1)                                                                                                                                                                                                                                                                                                                                                                                              | 104 kDa | 0.38  | 2  | 0 | 2  | 0 | 0 | 0 | 0 | 1 | 1 | 0 | 0 | 2.911062362 | 0% (0.22)    |
| Q8TBK5_HUMAN (+2) | F127A_HUMAN  | FAM127A | A6ZKI3 | Protein FAM127A (Mammalian retrotransposon derived protein 8C)                                                                                                                                                                                                                                                                                                                                                                                                           | 13 kDa  | 0.37  | 2  | 0 | 2  | 0 | 0 | 0 | 0 | 0 | 2 | 0 | 0 | 2.911062362 | 0% (0.22)    |
| B2RWP9_HUMAN      | PYRG2_HUMAN  | CTPS2   | Q9NRF8 | CTP synthase 2 (EC 6.3.4.2) (CTP synthetase 2) (UTP--ammonia ligase 2)                                                                                                                                                                                                                                                                                                                                                                                                   | 66 kDa  | 0.23  | 2  | 0 | 2  | 0 | 0 | 0 | 0 | 0 | 2 | 0 | 0 | 2.911062362 | 0% (0.22)    |
| GT251_HUMAN       | GRPE2_HUMAN  | GRPEL2  | Q8TAA5 | GrpE protein homolog 2, mitochondrial (Mt-GrpE#2)                                                                                                                                                                                                                                                                                                                                                                                                                        | 25 kDa  | 0.28  | 2  | 0 | 2  | 0 | 0 | 0 | 0 | 2 | 0 | 0 | 0 | 2.911062362 | 0% (0.22)    |
| RTN4_HUMAN        | B4DRC8_HUMAN |         | B4DRC8 | cDNA FLJ50047                                                                                                                                                                                                                                                                                                                                                                                                                                                            | 38 kDa  | 0.065 | 2  | 0 | 2  | 0 | 0 | 0 | 0 | 0 | 0 | 2 | 0 | 2.911062362 | 0% (0.22)    |
| COF1_HUMAN        | OSBL2_HUMAN  | OSBPL2  | Q9HIP3 | Oxysterol-binding protein-related protein 2 (ORP-2) (OSBP-related protein 2)                                                                                                                                                                                                                                                                                                                                                                                             | 55 kDa  | 0.52  | 2  | 0 | 2  | 0 | 0 | 0 | 0 | 0 | 2 | 0 | 0 | 2.911062362 | 0% (0.22)    |
| VPS35_HUMAN       | A5D8W8_HUMAN | GGT7    | A5D8W8 | Gamma-glutamyltransferase 7                                                                                                                                                                                                                                                                                                                                                                                                                                              | 70 kDa  | 0.33  | 2  | 0 | 2  | 0 | 0 | 0 | 0 | 2 | 0 | 0 | 0 | 2.911062362 | 0% (0.22)    |
| K6PP_HUMAN        | PR38A_HUMAN  | PRPF38A | Q8NAV1 | Pre-mRNA-splicing factor 38A                                                                                                                                                                                                                                                                                                                                                                                                                                             | 37 kDa  | 0.22  | 2  | 0 | 2  | 0 | 0 | 0 | 0 | 1 | 0 | 1 | 0 | 2.911062362 | 0% (0.22)    |
| RN213_HUMAN       | B3KTNS_HUMAN |         | B3KTNS | cDNA FLJ38538 fis, clone HCHON2001407, highly similar to LanC-like protein 2                                                                                                                                                                                                                                                                                                                                                                                             | 51 kDa  | 0.088 | 2  | 0 | 2  | 0 | 0 | 0 | 0 | 0 | 2 | 0 | 0 | 2.911062362 | 0% (0.22)    |
| Q06AH7_HUMAN (+2) | ACDSB_HUMAN  | ACDSB   | P45954 | Short/branched chain specific acyl-CoA dehydrogenase, mitochondrial (SBCAD) (EC 1.3.8.5) (2-methyl branched chain acyl-CoA dehydrogenase) (2-MEBCAD) (2-methylbutyryl-coenzyme A dehydrogenase) (2-methylbutyryl-CoA dehydrogenase)                                                                                                                                                                                                                                      | 47 kDa  | 0.38  | 9  | 2 | 7  | 2 | 0 | 0 | 0 | 2 | 4 | 0 | 1 | 2.842292878 | 0% (0.064)   |
| B2R5W3_HUMAN      | Q53GS0_HUMAN |         | Q53GS0 | Nucleolar GTP-binding protein 1 (Fragment)                                                                                                                                                                                                                                                                                                                                                                                                                               | 74 kDa  | 0.31  | 16 | 4 | 12 | 1 | 0 | 0 | 2 | 6 | 2 | 4 | 0 | 2.826017807 | 95% (0.023)  |
| XPO1_HUMAN        | PUR2_HUMAN   | GART    | P22102 | Trifunctional purine biosynthetic protein adenosine-3 [Includes: Phosphoribosylamine--glycine ligase (EC 6.3.4.13) (Glycinamide ribonucleotide synthetase) (GARS) (Phosphoribosylglycinamide synthetase); Phosphoribosylformylglycinamide cyclo-ligase (EC 6.3.3.1) (AIR synthase) (AIRS) (Phosphoribosylaminoimidazole synthetase); Phosphoribosylglycinamide formyltransferase (EC 2.1.2.2) (5'-phosphoribosylglycinamide transformylase) (GAR transformylase) (GART)] | 108 kDa | 0.24  | 30 | 8 | 22 | 0 | 1 | 1 | 6 | 9 | 9 | 4 | 0 | 2.814749232 | 95% (0.0032) |
| B4DVE1_HUMAN (+1) | Q6IBU0_HUMAN | EIF5    | Q6IBU0 | EIF5 protein                                                                                                                                                                                                                                                                                                                                                                                                                                                             | 49 kDa  | 0.18  | 19 | 5 | 14 | 0 | 2 | 2 | 1 | 3 | 7 | 4 | 0 | 2.732216199 | 95% (0.017)  |
| 1A69_HUMAN        | B4DHL7_HUMAN |         | B4DHL7 | cDNA FLJ59515                                                                                                                                                                                                                                                                                                                                                                                                                                                            | 85 kDa  | 0.37  | 19 | 5 | 14 | 0 | 1 | 3 | 1 | 4 | 6 | 4 | 0 | 2.732216199 | 95% (0.017)  |
| SSRP1_HUMAN       | A2RTY6_HUMAN | ITIH2   | A2RTY6 | Inter-alpha (Globulin) inhibitor H2 (Inter-alpha (Globulin) inhibitor H2, isoform CRA_b) (cDNA FLJ75038, highly similar to Homo sapiens inter-alpha (globulin) inhibitor H2 (ITIH2), mRNA)                                                                                                                                                                                                                                                                               | 106 kDa | 0.25  | 12 | 3 | 9  | 0 | 1 | 1 | 1 | 2 | 4 | 1 | 2 | 2.70047456  | 95% (0.049)  |
| ADT3_HUMAN        | B4E1K0_HUMAN | KIF23   | B4E1K0 | Kinesin-like protein KIF23 (cDNA FLJ58416, highly similar to Kinesin-like protein KIF23)                                                                                                                                                                                                                                                                                                                                                                                 | 78 kDa  | 0.6   | 12 | 3 | 9  | 0 | 2 | 1 | 0 | 2 | 1 | 4 | 2 | 2.70047456  | 95% (0.049)  |

|                   |              |          |        |                                                                                                                                                                                                                                                                                                     |         |      |     |    |    |   |    |    |    |    |    |    |    |             |                |
|-------------------|--------------|----------|--------|-----------------------------------------------------------------------------------------------------------------------------------------------------------------------------------------------------------------------------------------------------------------------------------------------------|---------|------|-----|----|----|---|----|----|----|----|----|----|----|-------------|----------------|
| NOP58_HUMAN       | B4DLE7_HUMAN |          | B4DLE7 | cDNA FLJ50983, highly similar to Homo sapiens lysocardiolipin acyltransferase (LYCAT), transcript variant 1, mRNA                                                                                                                                                                                   | 39 kDa  | 0.33 | 12  | 3  | 9  | 1 | 1  | 0  | 1  | 3  | 3  | 1  | 2  | 2.70047456  | 95% (0.049)    |
| Q53GF9_HUMAN      | Q06AH7_HUMAN | TF       | Q06AH7 | Transferrin                                                                                                                                                                                                                                                                                         | 77 kDa  | 0.28 | 117 | 34 | 83 | 1 | 11 | 10 | 12 | 27 | 13 | 30 | 14 | 2.67796886  | 95% (<0.00010) |
| HSP74_HUMAN (+1)  | B3KQ33_HUMAN |          | B3KQ33 | cDNA FLJ32715 fis, clone TESTI2000784, highly similar to Importin-4                                                                                                                                                                                                                                 | 119 kDa | 0.27 | 22  | 6  | 16 | 0 | 0  | 2  | 4  | 9  | 7  | 0  | 0  | 2.664300739 | 95% (0.013)    |
| NDUS1_HUMAN       | J3KN16_HUMAN | KIAA0368 | J3KN16 | Proteasome-associated protein ECM29 homolog                                                                                                                                                                                                                                                         | 224 kDa | 0.3  | 15  | 4  | 11 | 0 | 0  | 0  | 4  | 3  | 4  | 4  | 0  | 2.612695855 | 95% (0.037)    |
| TOP2B_HUMAN       | E9PF74_HUMAN | SLC25A19 | E9PF74 | Mitochondrial thiamine pyrophosphate carrier                                                                                                                                                                                                                                                        | 29 kDa  | 0.16 | 15  | 4  | 11 | 0 | 0  | 1  | 3  | 1  | 2  | 1  | 7  | 2.612695855 | 95% (0.037)    |
| FRIL_HUMAN        | FADS2_HUMAN  | FADS2    | O95864 | Fatty acid desaturase 2 (EC 1.14.19.-) (Delta(6) fatty acid desaturase) (D6D) (Delta(6) desaturase) (Delta-6 desaturase)                                                                                                                                                                            | 52 kDa  | 0.51 | 15  | 4  | 11 | 0 | 2  | 2  | 0  | 2  | 0  | 9  | 0  | 2.612695855 | 95% (0.037)    |
| CP27A_HUMAN       | COASY_HUMAN  | COASY    | Q13057 | Bifunctional coenzyme A synthase (CoA synthase) (NBP) (POV-2) [Includes: Phosphopantetheine adenylyltransferase (EC 2.7.7.3) (Dephospho-CoA pyrophosphorylase) (Pantetheine-phosphate adenylyltransferase) (PPAT); Dephospho-CoA kinase (DPCK) (EC 2.7.1.24) (Dephosphocoenzyme A kinase) (DPCOAK)] | 62 kDa  | 0.28 | 15  | 4  | 11 | 0 | 0  | 1  | 3  | 5  | 3  | 2  | 1  | 2.612695855 | 95% (0.037)    |
| RL7A_HUMAN        | GBF1_HUMAN   | GBF1     | Q92538 | Golgi-specific brefeldin A-resistance guanine nucleotide exchange factor 1 (BFA-resistant GEF 1)                                                                                                                                                                                                    | 206 kDa | 0.26 | 5   | 1  | 4  | 0 | 0  | 0  | 1  | 0  | 4  | 0  | 0  | 2.612533461 | 0% (0.15)      |
| 4F2_HUMAN (+2)    | TEX2_HUMAN   | TEX2     | Q8IWB9 | Testis-expressed sequence 2 protein (Transmembrane protein 96)                                                                                                                                                                                                                                      | 125 kDa | 0.31 | 5   | 1  | 4  | 0 | 0  | 0  | 1  | 1  | 1  | 1  | 1  | 2.612533461 | 0% (0.15)      |
| ERAP1_HUMAN       | PARN_HUMAN   | PARN     | O95453 | Poly(A)-specific ribonuclease PARN (EC 3.1.13.4) (Deadenylating nuclease) (Deadenylation nuclease) (Polyadenylate-specific ribonuclease)                                                                                                                                                            | 73 kDa  | 0.26 | 5   | 1  | 4  | 0 | 0  | 0  | 1  | 0  | 1  | 3  | 0  | 2.612533461 | 0% (0.15)      |
| PP1A_HUMAN        | NPA1P_HUMAN  | URB1     | O60287 | Nucleolar pre-ribosomal-associated protein 1 (Nucleolar protein 254 kDa) (URB1 ribosome biogenesis 1 homolog)                                                                                                                                                                                       | 254 kDa | 0.28 | 5   | 1  | 4  | 0 | 1  | 0  | 0  | 2  | 1  | 1  | 0  | 2.612533461 | 0% (0.15)      |
| B2R4M6_HUMAN (+1) | D3DNQ1_HUMAN | TLOC1    | D3DNQ1 | Translocation protein 1, isoform CRA_b                                                                                                                                                                                                                                                              | 41 kDa  | 0.68 | 5   | 1  | 4  | 1 | 0  | 0  | 0  | 0  | 2  | 0  | 2  | 2.612533461 | 0% (0.15)      |
| A5YM50_HUMAN (+3) | GDE_HUMAN    | AGL      | P35573 | Glycogen debranching enzyme (Glycogen debrancher) [Includes: 4-alpha-glucanotransferase (EC 2.4.1.25) (Oligo-1,4-1,4-glucantransferase); Amylo-alpha-1,6-glucosidase (Amylo-1,6-glucosidase) (EC 3.2.1.33) (Dextrin 6-alpha-D-glucosidase)]                                                         | 175 kDa | 0.44 | 5   | 1  | 4  | 0 | 0  | 0  | 1  | 2  | 2  | 0  | 0  | 2.612533461 | 0% (0.15)      |
| PRDX5_HUMAN       | B4DG11_HUMAN |          | B4DG11 | cDNA FLJ55382, highly similar to Hsp70-binding protein 1                                                                                                                                                                                                                                            | 44 kDa  | 0.45 | 5   | 1  | 4  | 0 | 0  | 0  | 1  | 3  | 1  | 0  | 0  | 2.612533461 | 0% (0.15)      |
| 1433Z_HUMAN (+1)  | RRF2M_HUMAN  | GFM2     | Q969S9 | Ribosome-releasing factor 2, mitochondrial (RRF2mt) (Elongation factor G2, mitochondrial) (EF-G2mt) (mEF-G 2) (Elongation factor G2) (hEFG2)                                                                                                                                                        | 87 kDa  | 0.48 | 5   | 1  | 4  | 0 | 1  | 0  | 0  | 2  | 0  | 2  | 0  | 2.612533461 | 0% (0.15)      |
| NAMPT_HUMAN       | SYRM_HUMAN   | RARS2    | Q5T160 | Probable arginine-tRNA ligase, mitochondrial (EC 6.1.1.19) (Arginyl-tRNA synthetase) (ArgRS)                                                                                                                                                                                                        | 66 kDa  | 0.29 | 5   | 1  | 4  | 0 | 0  | 1  | 0  | 2  | 0  | 0  | 2  | 2.612533461 | 0% (0.15)      |
| B7Z1R5_HUMAN (+1) | Q5LJA9_HUMAN | UCHL5    | Q5LJA9 | Ubiquitin carboxyl-terminal hydrolase isozyme L5 (Fragment)                                                                                                                                                                                                                                         | 42 kDa  | 0.34 | 5   | 1  | 4  | 0 | 0  | 1  | 0  | 1  | 4  | 0  | 0  | 2.612533461 | 0% (0.15)      |

|                   |              |        |        |                                                                                                                                                                                                                                                                                                                                           |         |      |     |    |     |    |    |    |    |    |     |    |    |             |                 |
|-------------------|--------------|--------|--------|-------------------------------------------------------------------------------------------------------------------------------------------------------------------------------------------------------------------------------------------------------------------------------------------------------------------------------------------|---------|------|-----|----|-----|----|----|----|----|----|-----|----|----|-------------|-----------------|
| EINZA1_HUMAN      | PP1G_HUMAN   | PP1G   | Q13427 | Peptidyl-prolyl cis-trans isomerase G (PPIase G) (Peptidyl-prolyl isomerase G) (EC 5.2.1.8) (CASP10) (Cik-associating RS-cyclophilin) (CARS-Cyp) (CARS-cyclophilin) (SR-cyclophilin) (SR-cyp) (SRcyp) (Cyclophilin G) (Rotamase G)                                                                                                        | 89 kDa  | 0.21 | 5   | 1  | 4   | 0  | 0  | 0  | 1  | 0  | 0   | 4  | 0  | 2.612533461 | 0% (0.15)       |
| ANXA3_HUMAN       | B2RDR4_HUMAN |        | B2RDR4 | cDNA, FLJ96732, highly similar to Homo sapiens testis derived transcript (3 LIM domains) (TES), transcript variant 1, mRNA                                                                                                                                                                                                                | 48 kDa  | 0.51 | 5   | 1  | 4   | 1  | 0  | 0  | 0  | 0  | 4   | 0  | 0  | 2.612533461 | 0% (0.15)       |
| PRDX6_HUMAN       | B9A062_HUMAN | MTHFD2 | B9A062 | Bifunctional methylenetetrahydrofolate dehydrogenase/cyclohydrolase, mitochondrial                                                                                                                                                                                                                                                        | 24 kDa  | 0.56 | 5   | 1  | 4   | 0  | 1  | 0  | 0  | 2  | 1   | 0  | 1  | 2.612533461 | 0% (0.15)       |
| ACADM_HUMAN (+2)  | B3KS61_HUMAN |        | B3KS61 | cDNA FLJ35571 fis, clone SPLN2005806, highly similar to Protein-S-isoprenylcysteineO-methyltransferase (EC 2.1.1.100)                                                                                                                                                                                                                     | 22 kDa  | 0.27 | 5   | 1  | 4   | 1  | 0  | 0  | 0  | 3  | 0   | 0  | 1  | 2.612533461 | 0% (0.15)       |
| DDB1_HUMAN        | SFXN2_HUMAN  | SFXN2  | Q96NB2 | Sideroflexin-2                                                                                                                                                                                                                                                                                                                            | 36 kDa  | 0.2  | 5   | 1  | 4   | 1  | 0  | 0  | 0  | 1  | 2   | 0  | 1  | 2.612533461 | 0% (0.15)       |
| DRA_HUMAN         | B7Z4A7_HUMAN | EV12B  | B7Z4A7 | Protein EV12B (cDNA FLJ55224, highly similar to EV12B protein)                                                                                                                                                                                                                                                                            | 51 kDa  | 0.26 | 5   | 1  | 4   | 0  | 0  | 1  | 0  | 0  | 0   | 3  | 1  | 2.612533461 | 0% (0.15)       |
| Q8TA92_HUMAN      | FA10_HUMAN   | F10    | P00742 | Coagulation factor X (EC 3.4.21.6) (Stuart factor) (Stuart-Prower factor) [Cleaved into: Factor X light chain; Factor X heavy chain; Activated factor Xa heavy chain]                                                                                                                                                                     | 55 kDa  | 0.15 | 5   | 1  | 4   | 0  | 0  | 0  | 1  | 0  | 4   | 0  | 0  | 2.612533461 | 0% (0.15)       |
| A8K8D9_HUMAN (+3) | TIGAR_HUMAN  | TIGAR  | Q9NQ88 | Fructose-2,6-bisphosphatase TIGAR (EC 3.1.3.46) (TP53-induced glycolysis and apoptosis regulator)                                                                                                                                                                                                                                         | 30 kDa  | 0.35 | 5   | 1  | 4   | 0  | 0  | 1  | 0  | 0  | 4   | 0  | 0  | 2.612533461 | 0% (0.15)       |
| RL10A_HUMAN       | DDX46_HUMAN  | DDX46  | Q7L014 | Probable ATP-dependent RNA helicase DDX46 (EC 3.6.4.13) (DEAD box protein 46) (PRP5 homolog)                                                                                                                                                                                                                                              | 117 kDa | 0.41 | 38  | 11 | 27  | 0  | 2  | 2  | 6  | 5  | 4   | 14 | 4  | 2.582589337 | 95% (0.0024)    |
| J3KN36_HUMAN (+3) | EEF1A1_HUMAN | EEF1A1 | P68104 | Elongation factor 1-alpha 1 (EF-1-alpha-1) (Elongation factor Tu) (EF-Tu) (Eukaryotic elongation factor 1 A-1) (eEF1A-1) (Leukocyte receptor cluster member 7)                                                                                                                                                                            | 50 kDa  | 0.19 | 317 | 96 | 222 | 13 | 28 | 24 | 32 | 26 | 137 | 40 | 22 | 2.575257241 | 95% (< 0.00010) |
| B4DZC0_HUMAN (+2) | TFB2M_HUMAN  | TFB2M  | Q9HSQ4 | Dimethyladenosine transferase 2, mitochondrial (EC 2.1.1.-) (Hepatitis C virus NS5A-transactivated protein 5) (HCV NS5A-transactivated protein 5) (Mitochondrial 12S rRNA dimethylase 2) (Mitochondrial transcription factor B2) (h-mTFB) (h-mTFB2) (hTFB2M) (mTFB2) (S-adenosylmethionine-6-N', N'-adenosyl(rRNA) dimethyltransferase 2) | 45 kDa  | 0.25 | 18  | 5  | 13  | 1  | 1  | 2  | 1  | 6  | 2   | 1  | 4  | 2.55301775  | 95% (0.028)     |
| SF3B1_HUMAN       | Q0VGA5_HUMAN | SARS   | Q0VGA5 | SARS protein                                                                                                                                                                                                                                                                                                                              | 58 kDa  | 0.15 | 31  | 9  | 22  | 0  | 0  | 1  | 8  | 7  | 9   | 6  | 0  | 2.540106912 | 95% (0.0062)    |
| ACOX1_HUMAN       | A2MG_HUMAN   | A2M    | P01023 | Alpha-2-macroglobulin (Alpha-2-M) (C3 and PZP-like alpha-2-macroglobulin domain-containing protein 5)                                                                                                                                                                                                                                     | 163 kDa | 0.31 | 31  | 9  | 22  | 0  | 1  | 7  | 1  | 2  | 1   | 6  | 12 | 2.540106912 | 95% (0.0062)    |
| RS9_HUMAN         | B4DIA6_HUMAN |        | B4DIA6 | cDNA FLJ57064, highly similar to Alpha crystallin B chain (Alpha(B)-crystallin)                                                                                                                                                                                                                                                           | 18 kDa  | 0.36 | 34  | 10 | 24  | 4  | 0  | 0  | 7  | 6  | 9   | 0  | 9  | 2.513440927 | 95% (0.0048)    |
| TOM40_HUMAN       | ATPF1_HUMAN  | ATPAF1 | Q5TC12 | ATP synthase mitochondrial F1 complex assembly factor 1 (ATP11 homolog)                                                                                                                                                                                                                                                                   | 36 kDa  | 0.27 | 21  | 6  | 15  | 1  | 2  | 2  | 1  | 10 | 2   | 3  | 0  | 2.509812412 | 95% (0.021)     |
| TCPB_HUMAN        | GNL3_HUMAN   | GNL3   | Q9BVP2 | Guanine nucleotide-binding protein-like 3 (E2-induced gene 3 protein) (Novel)                                                                                                                                                                                                                                                             | 62 kDa  | 0.34 | 8   | 2  | 6   | 0  | 0  | 1  | 1  | 2  | 3   | 1  | 0  | 2.497736596 | 0% (0.11)       |

|                   |              |         |        |                                                                                                                                                                                                  |         |      |    |    |    |   |   |   |   |    |    |    |   |             |     |          |  |  |
|-------------------|--------------|---------|--------|--------------------------------------------------------------------------------------------------------------------------------------------------------------------------------------------------|---------|------|----|----|----|---|---|---|---|----|----|----|---|-------------|-----|----------|--|--|
|                   |              |         |        | nucleolar protein 47) (NNP47) (Nucleolar GTP-binding protein 3) (Nucleostemin)                                                                                                                   |         |      |    |    |    |   |   |   |   |    |    |    |   |             |     |          |  |  |
| ARL8B_HUMAN (+1)  | TXD17_HUMAN  | TXNDC17 | Q9BRA2 | Thioredoxin domain-containing protein 17 (14 kDa thioredoxin-related protein) (TRP14) (Protein 42-9-9) (Thioredoxin-like protein 5)                                                              | 14 kDa  | 0.46 | 8  | 2  | 6  | 0 | 0 | 1 | 1 | 0  | 6  | 0  | 0 | 2.497736596 | 0%  | (0.11)   |  |  |
| B2R5U1_HUMAN (+2) | D6RGZ2_HUMAN | THOC3   | D6RGZ2 | THO complex subunit 3                                                                                                                                                                            | 11 kDa  | 0.3  | 8  | 2  | 6  | 0 | 0 | 0 | 2 | 3  | 0  | 2  | 1 | 2.497736596 | 0%  | (0.11)   |  |  |
| B4DH07_HUMAN      | ATG3_HUMAN   | ATG3    | Q9NT62 | Ubiquitin-like-conjugating enzyme ATG3 (EC 6.3.2.-) (Autophagy-related protein 3) (APG3-like) (hApg3) (Protein PC3-96)                                                                           | 36 kDa  | 0.24 | 8  | 2  | 6  | 0 | 0 | 1 | 1 | 5  | 1  | 0  | 0 | 2.497736596 | 0%  | (0.11)   |  |  |
| B2R5M9_HUMAN (+2) | J3KN55_HUMAN | MMAB    | J3KN55 | Cob(II)yrinic acid a,c-diamide adenosyltransferase, mitochondrial                                                                                                                                | 18 kDa  | 0.3  | 8  | 2  | 6  | 1 | 0 | 1 | 0 | 2  | 0  | 2  | 2 | 2.497736596 | 0%  | (0.11)   |  |  |
| RS2_HUMAN         | EMD_HUMAN    | EMD     | P50402 | Emerin                                                                                                                                                                                           | 29 kDa  | 0.33 | 8  | 2  | 6  | 1 | 0 | 0 | 1 | 2  | 0  | 2  | 2 | 2.497736596 | 0%  | (0.11)   |  |  |
| A8MPX9_HUMAN      | TIM22_HUMAN  | TIMM22  | Q9Y584 | Mitochondrial import inner membrane translocase subunit Tim22 (Testis-expressed sequence 4)                                                                                                      | 20 kDa  | 0.2  | 8  | 2  | 6  | 0 | 0 | 0 | 2 | 1  | 3  | 1  | 1 | 2.497736596 | 0%  | (0.11)   |  |  |
| SRPRB_HUMAN       | B4DEX8_HUMAN | MAT2A   | B4DEX8 | S-adenosylmethionine synthase (EC 2.5.1.6)                                                                                                                                                       | 40 kDa  | 0.49 | 8  | 2  | 6  | 0 | 0 | 0 | 2 | 2  | 0  | 4  | 0 | 2.497736596 | 0%  | (0.11)   |  |  |
| IF4A3_HUMAN       | MIF_HUMAN    | MIF     | P14174 | Macrophage migration inhibitory factor (MIF) (EC 5.3.2.1) (Glycosylation-inhibiting factor) (GIF) (L-dopachrome isomerase) (L-dopachrome tautomerase) (EC 5.3.3.12) (Phenylpyruvate tautomerase) | 12 kDa  | 0.37 | 27 | 8  | 19 | 1 | 3 | 4 | 0 | 4  | 7  | 5  | 3 | 2.451449961 | 95% | (0.012)  |  |  |
| LETM1_HUMAN       | PDPR_HUMAN   | PDPR    | Q8NCN5 | Pyruvate dehydrogenase phosphatase regulatory subunit, mitochondrial (PDPPr)                                                                                                                     | 99 kDa  | 0.25 | 47 | 14 | 32 | 2 | 5 | 6 | 1 | 21 | 2  | 1  | 9 | 2.441795579 | 95% | (0.0017) |  |  |
| B2RE46_HUMAN (+1) | APT_HUMAN    | APRT    | P07741 | Adenine phosphoribosyltransferase (APRT) (EC 2.4.2.7)                                                                                                                                            | 20 kDa  | 0.21 | 46 | 14 | 32 | 1 | 3 | 5 | 5 | 9  | 15 | 4  | 4 | 2.441795579 | 95% | (0.0017) |  |  |
| PSMD2_HUMAN (+1)  | RRS1_HUMAN   | RRS1    | Q15050 | Ribosome biogenesis regulatory protein homolog                                                                                                                                                   | 41 kDa  | 0.2  | 11 | 3  | 8  | 1 | 0 | 0 | 2 | 4  | 0  | 2  | 2 | 2.436978568 | 0%  | (0.080)  |  |  |
| TPR_HUMAN         | TR112_HUMAN  | TRMT112 | Q9UI30 | tRNA methyltransferase 112 homolog (TRM112-like protein)                                                                                                                                         | 14 kDa  | 0.13 | 11 | 3  | 8  | 0 | 0 | 0 | 3 | 5  | 2  | 1  | 0 | 2.436978568 | 0%  | (0.080)  |  |  |
| B5BTY4_HUMAN (+2) | COIL_HUMAN   | COIL    | P38432 | Coilin (p80)                                                                                                                                                                                     | 63 kDa  | 0.26 | 11 | 3  | 8  | 0 | 1 | 1 | 1 | 4  | 1  | 2  | 1 | 2.436978568 | 0%  | (0.080)  |  |  |
| ACSL3_HUMAN (+2)  | DDX47_HUMAN  | DDX47   | Q9H0S4 | Probable ATP-dependent RNA helicase DDX47 (EC 3.6.4.13) (DEAD box protein 47)                                                                                                                    | 51 kDa  | 0.23 | 30 | 9  | 21 | 0 | 1 | 5 | 3 | 4  | 7  | 6  | 4 | 2.430820025 | 95% | (0.0095) |  |  |
| B2R5M8_HUMAN (+1) | B3KN29_HUMAN |         | B3KN29 | cDNA FLJ13371 fis, clone PLACE1000656, highly similar to PRA1 family protein 2                                                                                                                   | 19 kDa  | 0.37 | 30 | 9  | 21 | 4 | 0 | 0 | 5 | 1  | 12 | 5  | 3 | 2.430820025 | 95% | (0.0095) |  |  |
| EFGM_HUMAN        | UBP5_HUMAN   | USP5    | P45974 | Ubiquitin carboxyl-terminal hydrolase 5 (EC 3.4.19.12) (Deubiquitinating enzyme 5) (Isopeptidase T) (Ubiquitin thioesterase 5) (Ubiquitin-specific-processing protease 5)                        | 96 kDa  | 0.26 | 34 | 10 | 23 | 0 | 0 | 3 | 7 | 6  | 15 | 3  | 0 | 2.413863977 | 95% | (0.0073) |  |  |
| NDUA9_HUMAN (+1)  | THOC2_HUMAN  | THOC2   | Q8NI27 | THO complex subunit 2 (Tho2) (hTREX120)                                                                                                                                                          | 183 kDa | 0.42 | 36 | 11 | 25 | 1 | 2 | 4 | 3 | 7  | 1  | 12 | 5 | 2.399682091 | 95% | (0.0056) |  |  |
| P5CS_HUMAN        | Q5W0H4_HUMAN | TPT1    | Q5W0H4 | Translationally-controlled tumor protein                                                                                                                                                         | 22 kDa  | 0.29 | 35 | 11 | 25 | 2 | 4 | 3 | 1 | 8  | 8  | 6  | 3 | 2.399682091 | 95% | (0.0056) |  |  |
| ACAD9_HUMAN       | IF2P_HUMAN   | EIF5B   | O60841 | Eukaryotic translation initiation factor 5B (eIF-5B) (Translation initiation factor IF-2)                                                                                                        | 139 kDa | 0.25 | 14 | 4  | 10 | 0 | 2 | 1 | 1 | 3  | 2  | 4  | 1 | 2.399380041 | 0%  | (0.059)  |  |  |
| BAP31_HUMAN (+1)  | D7PBN3_HUMAN |         | D7PBN3 | ESRP1/RAP1 fusion protein                                                                                                                                                                        | 119 kDa | 0.37 | 14 | 4  | 10 | 0 | 3 | 1 | 0 | 4  | 3  | 3  | 0 | 2.399380041 | 0%  | (0.059)  |  |  |
| SUCB2_HUMAN       | GAK_HUMAN    | GAK     | O14976 | Cyclin-G-associated kinase (EC 2.7.11.1)                                                                                                                                                         | 143 kDa | 0.28 | 17 | 5  | 12 | 0 | 1 | 2 | 3 | 3  | 6  | 3  | 0 | 2.373824457 | 95% | (0.044)  |  |  |
| HMI13_HUMAN       | LAS1L_HUMAN  | LAS1L   | Q9Y4W2 | Ribosomal biogenesis protein LAS1L (Protein LAS1 homolog)                                                                                                                                        | 83 kDa  | 0.23 | 17 | 5  | 12 | 2 | 0 | 0 | 3 | 6  | 2  | 0  | 5 | 2.373824457 | 95% | (0.044)  |  |  |
| FKBP4_HUMAN       | B7Z6C2_HUMAN |         | B7Z6C2 | cDNA FLJ50663, highly similar to                                                                                                                                                                 | 64 kDa  | 0.35 | 17 | 5  | 12 | 0 | 3 | 2 | 0 | 1  | 10 | 1  | 0 | 2.373824457 | 95% | (0.044)  |  |  |



|                   |              |          |        |                                                                                                                                                                                                                                              |         |      |    |    |    |   |   |   |   |    |    |   |   |             |              |
|-------------------|--------------|----------|--------|----------------------------------------------------------------------------------------------------------------------------------------------------------------------------------------------------------------------------------------------|---------|------|----|----|----|---|---|---|---|----|----|---|---|-------------|--------------|
| AP2A2_HUMAN       | B5BTZ6_HUMAN | STAT3    | B5BTZ6 | Signal transducer and activator of transcription                                                                                                                                                                                             | 88 kDa  | 0.22 | 60 | 20 | 41 | 3 | 7 | 3 | 7 | 12 | 21 | 9 | 0 | 2.226783752 | 95% (0.0012) |
| B2R6J2_HUMAN (+2) | SYYC_HUMAN   | YARS     | P54577 | Tyrosine-tRNA ligase, cytoplasmic (EC 6.1.1.1) (Tyrosyl-tRNA synthetase) (TyRS) [Cleared into: Tyrosine-tRNA ligase, cytoplasmic, N-terminally processed]                                                                                    | 59 kDa  | 0.24 | 28 | 9  | 19 | 0 | 3 | 3 | 3 | 7  | 8  | 3 | 1 | 2.212255685 | 95% (0.022)  |
| ATLA3_HUMAN (+1)  | UMPS_HUMAN   | UMPS     | P11172 | Uridine 5'-monophosphate synthase (UMP synthase) [Includes: Orotate phosphoribosyltransferase (OPRT) (OPRTase) (EC 2.4.2.10); Orotidine 5'-phosphate decarboxylase (ODC) (EC 4.1.1.23) (OMPdecase)]                                          | 52 kDa  | 0.22 | 25 | 8  | 17 | 0 | 2 | 5 | 1 | 12 | 2  | 3 | 1 | 2.20926787  | 95% (0.029)  |
| F8W1R7_HUMAN (+2) | Q53FW8_HUMAN |          | Q53FW8 | TAP binding protein-like variant (Fragment)                                                                                                                                                                                                  | 50 kDa  | 0.61 | 22 | 7  | 15 | 2 | 0 | 0 | 6 | 0  | 11 | 0 | 5 | 2.205564386 | 95% (0.038)  |
| B4DJX1_HUMAN (+1) | Q53G19_HUMAN |          | Q53G19 | Mitochondrial ribosomal protein L11 isoform a variant (Fragment)                                                                                                                                                                             | 21 kDa  | 0.22 | 22 | 7  | 15 | 3 | 3 | 0 | 1 | 4  | 0  | 5 | 6 | 2.205564386 | 95% (0.038)  |
| NUMA1_HUMAN (+1)  | DHTK1_HUMAN  | DHTK1    | Q96HY7 | Probable 2-oxoglutarate dehydrogenase E1 component DHKTD1, mitochondrial (EC 1.2.4.2) (Dehydrogenase E1 and transketolase domain-containing protein 1)                                                                                       | 103 kDa | 0.16 | 16 | 5  | 11 | 2 | 2 | 1 | 0 | 7  | 1  | 1 | 2 | 2.19463632  | 0% (0.068)   |
| Q32Q12_HUMAN      | B5MCF9_HUMAN | PES1     | B5MCF9 | Pescadillo homolog                                                                                                                                                                                                                           | 66 kDa  | 0.32 | 16 | 5  | 11 | 0 | 2 | 2 | 1 | 5  | 0  | 4 | 2 | 2.19463632  | 0% (0.068)   |
| NNTM_HUMAN (+1)   | RFA1_HUMAN   | RPA1     | P27694 | Replication protein A 70 kDa DNA-binding subunit (RP-A p70) (Replication factor A protein 1) (RF-A protein 1) (Single-stranded DNA-binding protein) [Cleared into: Replication protein A 70 kDa DNA-binding subunit, N-terminally processed] | 68 kDa  | 0.18 | 16 | 5  | 11 | 0 | 1 | 2 | 2 | 6  | 3  | 2 | 0 | 2.19463632  | 0% (0.068)   |
| DHC24_HUMAN       | ANT3_HUMAN   | SERPINC1 | P01008 | Antithrombin-III (ATIII) (Serpin C1)                                                                                                                                                                                                         | 53 kDa  | 0.23 | 13 | 4  | 9  | 0 | 1 | 1 | 2 | 1  | 4  | 1 | 3 | 2.186070365 | 0% (0.093)   |
| A7BI36_HUMAN      | DAZP1_HUMAN  | DAZAP1   | Q96EP5 | DAZ-associated protein 1 (Deleted in azoospermia-associated protein 1)                                                                                                                                                                       | 43 kDa  | 0.19 | 13 | 4  | 9  | 0 | 0 | 3 | 2 | 2  | 0  | 3 | 4 | 2.186070365 | 0% (0.093)   |
| SC22B_HUMAN       | RTN1_HUMAN   | RTN1     | Q16799 | Reticulon-1 (Neuroendocrine-specific protein)                                                                                                                                                                                                | 84 kDa  | 0.34 | 13 | 4  | 9  | 0 | 2 | 1 | 0 | 0  | 2  | 1 | 5 | 2.186070365 | 0% (0.093)   |
| Q53HU0_HUMAN (+1) | B3KRC6_HUMAN |          | B3KRC6 | cDNA FLJ34004 fis, clone FCBBF1000232, highly similar to Cytochrome P450 51A1 (EC 1.14.13.70)                                                                                                                                                | 51 kDa  | 0.37 | 13 | 4  | 9  | 4 | 0 | 0 | 0 | 4  | 1  | 1 | 3 | 2.186070365 | 0% (0.093)   |
| B4DLW8_HUMAN (+4) | Q59E99_HUMAN |          | Q59E99 | Thrombospondin 1 variant (Fragment)                                                                                                                                                                                                          | 135 kDa | 0.31 | 10 | 3  | 7  | 0 | 2 | 1 | 0 | 3  | 2  | 1 | 1 | 2.173490157 | 0% (0.13)    |
| MCU_HUMAN         | J3KMX1_HUMAN | NUP88    | J3KMX1 | Nuclear pore complex protein Nup88 (Fragment)                                                                                                                                                                                                | 79 kDa  | 0.28 | 10 | 3  | 7  | 0 | 1 | 0 | 2 | 1  | 1  | 5 | 0 | 2.173490157 | 0% (0.13)    |
| CAN1_HUMAN        | B4DQJ1_HUMAN | SNRNP40  | B4DQJ1 | U5 small nuclear ribonucleoprotein 40 kDa protein (cDNA FLJ56825, highly similar to WD repeat protein 57)                                                                                                                                    | 45 kDa  | 0.24 | 10 | 3  | 7  | 2 | 1 | 0 | 0 | 1  | 0  | 3 | 3 | 2.173490157 | 0% (0.13)    |
| MCCB_HUMAN        | MSLN_HUMAN   | MSLN     | Q13421 | Mesothelin (CAK1 antigen) (Pre-pro-megakaryocyte-potentiating factor) [Cleared into: Megakaryocyte-potentiating factor (MPF); Mesothelin, cleaved form]                                                                                      | 69 kDa  | 0.25 | 10 | 3  | 7  | 2 | 0 | 0 | 1 | 4  | 0  | 2 | 1 | 2.173490157 | 0% (0.13)    |
| Q4LE36_HUMAN      | PURA2_HUMAN  | ADSS     | P30520 | Adenylosuccinate synthetase isozyme 2 (AMPSase 2) (ADSS 2) (EC 6.3.4.4) (Adenylosuccinate synthetase, acidic isozyme) (Adenylosuccinate synthetase, liver isozyme) (L-type adenylosuccinate synthetase) (IMP--aspartate ligase 2)            | 50 kDa  | 0.25 | 10 | 3  | 7  | 0 | 0 | 0 | 3 | 2  | 4  | 1 | 0 | 2.173490157 | 0% (0.13)    |
| A8K916_HUMAN (+2) | B4DTS6_HUMAN |          | B4DTS6 | cDNA FLJ54117, highly similar to CD97 antigen                                                                                                                                                                                                | 84 kDa  | 0.19 | 10 | 3  | 7  | 0 | 2 | 1 | 0 | 0  | 0  | 2 | 5 | 2.173490157 | 0% (0.13)    |

|                   |              |           |        |                                                                                                                                                                                                                                                                                                                                                                                                                                             |         |      |     |    |     |    |    |    |    |   |    |    |    |             |                 |
|-------------------|--------------|-----------|--------|---------------------------------------------------------------------------------------------------------------------------------------------------------------------------------------------------------------------------------------------------------------------------------------------------------------------------------------------------------------------------------------------------------------------------------------------|---------|------|-----|----|-----|----|----|----|----|---|----|----|----|-------------|-----------------|
| GPXI_HUMAN        | E9PGN7_HUMAN | SERPING1  | E9PGN7 | Plasma protease C1 inhibitor                                                                                                                                                                                                                                                                                                                                                                                                                | 59 kDa  | 0.41 | 10  | 3  | 7   | 0  | 0  | 0  | 3  | 1 | 0  | 2  | 4  | 2.173490157 | 0% (0.13)       |
| GBLP_HUMAN        | B3KY30_HUMAN |           | B3KY30 | cDNA FLJ46699 fis, clone TRACH3013700, highly similar to Stress 70 protein chaperonemicrosome-associated 60 kDa protein                                                                                                                                                                                                                                                                                                                     | 29 kDa  | 0.44 | 10  | 3  | 7   | 1  | 1  | 1  | 0  | 1 | 0  | 2  | 4  | 2.173490157 | 0% (0.13)       |
| PNPT1_HUMAN       | PORED_HUMAN  | SRD5A3    | Q9H8P0 | Polyprenol reductase (EC 1.3.1.94) (3-oxo-5-alpha-steroid 4-dehydrogenase 3) (EC 1.3.1.22) (Steroid 5-alpha-reductase 2-like) (Steroid 5-alpha-reductase 3) (S5AR 3) (SR type 3)                                                                                                                                                                                                                                                            | 37 kDa  | 0.26 | 10  | 3  | 7   | 3  | 0  | 0  | 0  | 0 | 4  | 1  | 2  | 2.173490157 | 0% (0.13)       |
| Q8IWP6_HUMAN      | RSF1_HUMAN   | RSF1      | Q96T23 | Remodeling and spacing factor 1 (Rsf-1) (HBV pX-associated protein 8) (Hepatitis B virus X-associated protein) (p325 subunit of RSF chromatin-remodeling complex)                                                                                                                                                                                                                                                                           | 164 kDa | 0.49 | 7   | 2  | 5   | 1  | 0  | 1  | 0  | 3 | 0  | 0  | 2  | 2.153190229 | 0% (0.18)       |
| OAT_HUMAN         | RFC1_HUMAN   | RFC1      | P35251 | Replication factor C subunit 1 (Activator 1 140 kDa subunit) (A1 140 kDa subunit) (Activator 1 large subunit) (Activator 1 subunit 1) (DNA-binding protein PO-GA) (Replication factor C 140 kDa subunit) (RF-C 140 kDa subunit) (RFC140) (Replication factor C large subunit)                                                                                                                                                               | 128 kDa | 0.29 | 7   | 2  | 5   | 0  | 0  | 1  | 1  | 1 | 1  | 3  | 0  | 2.153190229 | 0% (0.18)       |
| VPP3_HUMAN        | E41L5_HUMAN  | EPB41L5   | Q9HCM4 | Band 4.1-like protein 5                                                                                                                                                                                                                                                                                                                                                                                                                     | 82 kDa  | 0.25 | 7   | 2  | 5   | 1  | 0  | 0  | 1  | 0 | 5  | 0  | 0  | 2.153190229 | 0% (0.18)       |
| DHB11_HUMAN       | B7Z787_HUMAN |           | B7Z787 | cDNA FLJ54765                                                                                                                                                                                                                                                                                                                                                                                                                               | 48 kDa  | 0.44 | 7   | 2  | 5   | 0  | 0  | 0  | 2  | 2 | 1  | 1  | 1  | 2.153190229 | 0% (0.18)       |
| B1AZV3_HUMAN (+1) | RBM28_HUMAN  | RBM28     | Q9NW13 | RNA-binding protein 28 (RNA-binding motif protein 28)                                                                                                                                                                                                                                                                                                                                                                                       | 86 kDa  | 0.19 | 7   | 2  | 5   | 0  | 0  | 0  | 2  | 0 | 1  | 4  | 0  | 2.153190229 | 0% (0.18)       |
| TACD2_HUMAN       | RT15_HUMAN   | MRPS15    | P82914 | 28S ribosomal protein S15, mitochondrial (MRP-S15) (S15mt)                                                                                                                                                                                                                                                                                                                                                                                  | 30 kDa  | 0.23 | 7   | 2  | 5   | 1  | 0  | 0  | 1  | 2 | 1  | 1  | 1  | 2.153190229 | 0% (0.18)       |
| A5YM53_HUMAN (+2) | D6W4Z6_HUMAN | hCG_23833 | D6W4Z6 | HCG23833, isoform CRA_b                                                                                                                                                                                                                                                                                                                                                                                                                     | 51 kDa  | 0.2  | 7   | 2  | 5   | 0  | 1  | 0  | 1  | 3 | 0  | 2  | 0  | 2.153190229 | 0% (0.18)       |
| HS105_HUMAN       | B2R7C2_HUMAN |           | B2R7C2 | cDNA, FLJ93375, highly similar to Homo sapiens ZW10, kinetochore associated, homolog (Drosophila) (ZW10), mRNA                                                                                                                                                                                                                                                                                                                              | 89 kDa  | 0.25 | 7   | 2  | 5   | 0  | 0  | 2  | 0  | 2 | 0  | 2  | 1  | 2.153190229 | 0% (0.18)       |
| B3KX11_HUMAN (+1) | ASGL1_HUMAN  | ASRGL1    | Q7L266 | Isoaspartyl peptidase/L-asparaginase (EC 3.4.19.5) (EC 3.5.1.1) (Asparaginase-like protein 1) (Beta-aspartyl-peptidase) (Isoaspartyl dipeptidase) (L-asparagine amidohydrolase) [Cleaved into: Isoaspartyl peptidase/L-asparaginase alpha chain; Isoaspartyl peptidase/L-asparaginase beta chain]                                                                                                                                           | 32 kDa  | 0.31 | 7   | 2  | 5   | 0  | 0  | 0  | 2  | 1 | 3  | 1  | 0  | 2.153190229 | 0% (0.18)       |
| PLOD2_HUMAN       | C9JLU1_HUMAN | POLR2H    | C9JLU1 | DNA-directed RNA polymerases I, II, and III subunit RPABC3 (Fragment)                                                                                                                                                                                                                                                                                                                                                                       | 17 kDa  | 0.28 | 7   | 2  | 5   | 0  | 0  | 0  | 2  | 1 | 2  | 2  | 0  | 2.153190229 | 0% (0.18)       |
| F2Z2U8_HUMAN (+2) | CO3_HUMAN    | C3        | P01024 | Complement C3 (C3 and PZP-like alpha-2-macroglobulin domain-containing protein 1) [Cleaved into: Complement C3 beta chain; Complement C3 alpha chain; C3a anaphylatoxin; Acylation stimulating protein (ASP) (C3adesArg); Complement C3b alpha' chain; Complement C3c alpha' chain fragment 1; Complement C3dg fragment; Complement C3g fragment; Complement C3d fragment; Complement C3f fragment; Complement C3c alpha' chain fragment 2] | 187 kDa | 0.18 | 156 | 54 | 104 | 18 | 11 | 11 | 15 | 5 | 14 | 38 | 47 | 2.134539838 | 95% (< 0.00010) |

|                   |              |         |        |                                                                                                                                                                                                                                                                                                          |         |      |    |    |    |   |   |   |   |    |    |   |   |             |             |
|-------------------|--------------|---------|--------|----------------------------------------------------------------------------------------------------------------------------------------------------------------------------------------------------------------------------------------------------------------------------------------------------------|---------|------|----|----|----|---|---|---|---|----|----|---|---|-------------|-------------|
| PLAK_HUMAN        | SYTM_HUMAN   | TARS2   | Q9BW92 | Threonine-tRNA ligase, mitochondrial (EC 6.1.1.3) (Threonyl-tRNA synthetase) (ThrRS) (Threonyl-tRNA synthetase-like 1)                                                                                                                                                                                   | 81 kDa  | 0.34 | 33 | 11 | 22 | 4 | 3 | 2 | 2 | 11 | 1  | 3 | 7 | 2.12534096  | 95% (0.018) |
| ABHDA_HUMAN       | EIF3M_HUMAN  | EIF3M   | Q7L2H7 | Eukaryotic translation initiation factor 3 subunit M (eIF3m) (Fetal lung protein B5) (hFL-B5) (PCI domain-containing protein 1)                                                                                                                                                                          | 43 kDa  | 0.31 | 33 | 11 | 22 | 0 | 5 | 1 | 5 | 6  | 10 | 4 | 2 | 2.12534096  | 95% (0.018) |
| ABHDB_HUMAN       | MTOR_HUMAN   | MTOR    | P42345 | Serine/threonine-protein kinase mTOR (EC 2.7.11.1) (FK506-binding protein 12-rapamycin complex-associated protein 1) (FKBP12-rapamycin complex-associated protein) (Mammalian target of rapamycin) (mTOR) (Mechanistic target of rapamycin) (Rapamycin and FKBP12 target 1) (Rapamycin target protein 1) | 289 kDa | 0.23 | 4  | 1  | 3  | 1 | 0 | 0 | 0 | 1  | 0  | 2 | 0 | 2.114877617 | 0% (0.27)   |
| ANXA7_HUMAN (+6)  | B3KMQ6_HUMAN |         | B3KMQ6 | cDNA FLJ12172 fis, clone MAMMA1000684, highly similar to Opioid growth factor receptor                                                                                                                                                                                                                   | 73 kDa  | 0.23 | 4  | 1  | 3  | 0 | 0 | 0 | 1 | 0  | 3  | 0 | 0 | 2.114877617 | 0% (0.27)   |
| B4DV28_HUMAN (+1) | ATS1_HUMAN   | ADAMTS1 | Q9UHI8 | A disintegrin and metalloproteinase with thrombospondin motifs 1 (ADAM-TS 1) (ADAM-TS1) (ADAMTS-1) (EC 3.4.24.-) (METH-1)                                                                                                                                                                                | 105 kDa | 0.27 | 4  | 1  | 3  | 0 | 0 | 0 | 1 | 3  | 0  | 0 | 0 | 2.114877617 | 0% (0.27)   |
| CY1_HUMAN (+1)    | MTER1_HUMAN  | MTERFD1 | Q96E29 | mTERF domain-containing protein 1, mitochondrial (Mitochondrial transcription termination factor 3) (mTERF3)                                                                                                                                                                                             | 48 kDa  | 0.28 | 4  | 1  | 3  | 0 | 1 | 0 | 0 | 2  | 0  | 1 | 0 | 2.114877617 | 0% (0.27)   |
| GSTP1_HUMAN       | COQ6_HUMAN   | COQ6    | Q9Y2Z9 | Ubiquinone biosynthesis monooxygenase COQ6 (EC 1.14.13.-) (Coenzyme Q10 monooxygenase 6)                                                                                                                                                                                                                 | 51 kDa  | 0.49 | 4  | 1  | 3  | 0 | 0 | 0 | 1 | 3  | 0  | 0 | 0 | 2.114877617 | 0% (0.27)   |
| B3KPS3_HUMAN (+2) | CSDE1_HUMAN  | CSDE1   | O75534 | Cold shock domain-containing protein E1 (N-ras upstream gene protein) (Protein UNR)                                                                                                                                                                                                                      | 89 kDa  | 0.47 | 4  | 1  | 3  | 0 | 0 | 0 | 1 | 0  | 2  | 1 | 0 | 2.114877617 | 0% (0.27)   |
| H0Y8C6_HUMAN (+1) | A8KAJ7_HUMAN |         | A8KAJ7 | cDNA FLJ77222, highly similar to Homo sapiens UDP-N-acetyl-alpha-D-galactosamine polypeptide N-acetylgalactosaminyltransferase 1 (GalNAc-T1) (GALNT1), mRNA                                                                                                                                              | 64 kDa  | 0.2  | 4  | 1  | 3  | 0 | 0 | 0 | 1 | 0  | 3  | 0 | 0 | 2.114877617 | 0% (0.27)   |
| PAI2_HUMAN        | AATC_HUMAN   | GOT1    | P17174 | Aspartate aminotransferase, cytoplasmic (cAspAT) (EC 2.6.1.1) (EC 2.6.1.3) (Cysteine aminotransferase, cytoplasmic) (Cysteine transaminase, cytoplasmic) (cCAT) (Glutamate oxaloacetate transaminase 1) (Transaminase A)                                                                                 | 46 kDa  | 0.26 | 4  | 1  | 3  | 0 | 0 | 0 | 1 | 3  | 1  | 0 | 0 | 2.114877617 | 0% (0.27)   |
| PO210_HUMAN       | Q6NURI_HUMAN | NCAPG   | Q6NURI | Non-SMC condensin I complex, subunit G                                                                                                                                                                                                                                                                   | 114 kDa | 0.12 | 4  | 1  | 3  | 0 | 0 | 1 | 0 | 2  | 1  | 0 | 0 | 2.114877617 | 0% (0.27)   |
| SGPL1_HUMAN       | B4DM85_HUMAN |         | B4DM85 | cDNA FLJ56002, highly similar to Kinesin-like protein KIF2                                                                                                                                                                                                                                               | 84 kDa  | 0.22 | 4  | 1  | 3  | 0 | 1 | 0 | 0 | 1  | 2  | 0 | 0 | 2.114877617 | 0% (0.27)   |
| A8K8U1_HUMAN (+1) | RENT2_HUMAN  | UPF2    | Q9HAU5 | Regulator of nonsense transcripts 2 (Nonsense mRNA reducing factor 2) (Up-frameshift suppressor 2 homolog) (hUpf2)                                                                                                                                                                                       | 148 kDa | 0.18 | 4  | 1  | 3  | 0 | 0 | 1 | 0 | 3  | 0  | 0 | 0 | 2.114877617 | 0% (0.27)   |
| F213A_HUMAN       | RCL1_HUMAN   | RCL1    | Q9Y2P8 | RNA 3'-terminal phosphate cyclase-like protein                                                                                                                                                                                                                                                           | 41 kDa  | 0.36 | 4  | 1  | 3  | 0 | 0 | 0 | 1 | 0  | 0  | 1 | 2 | 2.114877617 | 0% (0.27)   |
| A8KAP9_HUMAN (+1) | FA50A_HUMAN  | FAM50A  | Q14320 | Protein FAM50A (Protein HXC-26) (Protein XAP-5)                                                                                                                                                                                                                                                          | 40 kDa  | 0.25 | 4  | 1  | 3  | 0 | 0 | 0 | 1 | 0  | 3  | 0 | 0 | 2.114877617 | 0% (0.27)   |
| B7Z6B8_HUMAN (+1) | OSBP1_HUMAN  | OSBP    | P22059 | Oxysterol-binding protein 1                                                                                                                                                                                                                                                                              | 89 kDa  | 0.31 | 4  | 1  | 3  | 1 | 1 | 0 | 0 | 0  | 2  | 1 | 0 | 2.114877617 | 0% (0.27)   |
| COX41_HUMAN       | PSB5_HUMAN   | PSMB5   | P28074 | Proteasome subunit beta type-5 (EC 3.4.25.1) (Macropain epsilon chain) (Multicatalytic                                                                                                                                                                                                                   | 28 kDa  | 0.49 | 3  | 1  | 3  | 0 | 0 | 0 | 1 | 1  | 1  | 0 | 0 | 2.114877617 | 0% (0.27)   |



|                   |              |         |        |                                                                                                                                                                                                                                   |         |      |    |    |    |    |   |   |   |    |    |    |    |             |              |
|-------------------|--------------|---------|--------|-----------------------------------------------------------------------------------------------------------------------------------------------------------------------------------------------------------------------------------|---------|------|----|----|----|----|---|---|---|----|----|----|----|-------------|--------------|
|                   |              |         |        | endopeptidase complex epsilon chain) (Proteasome chain 6) (Proteasome epsilon chain) (Proteasome subunit MB1) (Proteasome subunit X)                                                                                              |         |      |    |    |    |    |   |   |   |    |    |    |    |             |              |
| DSRAD_HUMAN (+1)  | A8MVT4_HUMAN | MRPL23  | A8MVT4 | 39S ribosomal protein L23, mitochondrial                                                                                                                                                                                          | 19 kDa  | 0.12 | 4  | 1  | 3  | 0  | 0 | 0 | 1 | 1  | 0  | 1  | 1  | 2.114877617 | 0% (0.27)    |
| ILVBL_HUMAN       | B7Z377_HUMAN |         | B7Z377 | cDNA FLJ57937, highly similar to DNA-directed RNA polymerase II 33 kDa polypeptide (EC 2.7.7.6)                                                                                                                                   | 17 kDa  | 0.19 | 4  | 1  | 3  | 0  | 0 | 0 | 1 | 0  | 0  | 2  | 1  | 2.114877617 | 0% (0.27)    |
| MBB1A_HUMAN       | RM01_HUMAN   | MRPL1   | Q9BYD6 | 39S ribosomal protein L1, mitochondrial (L1mt) (MRP-L1)                                                                                                                                                                           | 37 kDa  | 0.13 | 27 | 9  | 18 | 5  | 1 | 3 | 0 | 8  | 3  | 3  | 4  | 2.102978232 | 95% (0.032)  |
| PLOD3_HUMAN       | B2R739_HUMAN |         | B2R739 | cDNA, FLJ93269, highly similar to Homo sapiens mitochondrial ribosomal protein L15 (MRPL15), nuclear gene encoding mitochondrial protein, mRNA                                                                                    | 33 kDa  | 0.26 | 27 | 9  | 18 | 4  | 1 | 2 | 2 | 8  | 2  | 3  | 5  | 2.102978232 | 95% (0.032)  |
| RL10_HUMAN        | J3KQ32_HUMAN | OLA1    | J3KQ32 | Obg-like ATPase 1                                                                                                                                                                                                                 | 47 kDa  | 0.15 | 27 | 9  | 18 | 0  | 2 | 2 | 5 | 3  | 6  | 4  | 5  | 2.102978232 | 95% (0.032)  |
| SP16H_HUMAN       | RBP2_HUMAN   | RANBP2  | P49792 | E3 SUMO-protein ligase RanBP2 (EC 6.3.2.-) (358 kDa nucleoporin) (Nuclear pore complex protein Nup358) (Nucleoporin Nup358) (Ran-binding protein 2) (RanBP2) (p270)                                                               | 358 kDa | 0.19 | 50 | 17 | 33 | 2  | 4 | 4 | 7 | 7  | 6  | 15 | 5  | 2.101719296 | 95% (0.0054) |
| CPT2_HUMAN        | BDH_HUMAN    | BDH1    | Q02338 | D-beta-hydroxybutyrate dehydrogenase, mitochondrial (BDH) (EC 1.1.1.30) (3-hydroxybutyrate dehydrogenase)                                                                                                                         | 38 kDa  | 0.19 | 49 | 17 | 33 | 7  | 1 | 0 | 8 | 13 | 12 | 7  | 1  | 2.101719296 | 95% (0.0054) |
| XPO2_HUMAN        | PLPL6_HUMAN  | PNPLA6  | Q8IY17 | Neuropathy target esterase (EC 3.1.1.5) (Patatin-like phospholipase domain-containing protein 6)                                                                                                                                  | 150 kDa | 0.28 | 24 | 8  | 16 | 6  | 0 | 1 | 1 | 4  | 1  | 5  | 6  | 2.088182052 | 95% (0.042)  |
| P4K2A_HUMAN       | NUP98_HUMAN  | NUP98   | P52948 | Nuclear pore complex protein Nup98-Nup96 [Cleaved into: Nuclear pore complex protein Nup98 (98 kDa nucleoporin) (Nucleoporin Nup98) (Nup98); Nuclear pore complex protein Nup96 (96 kDa nucleoporin) (Nucleoporin Nup96) (Nup96)] | 198 kDa | 0.35 | 44 | 15 | 29 | 4  | 2 | 2 | 7 | 4  | 3  | 15 | 7  | 2.084659746 | 95% (0.0091) |
| B2R6D7_HUMAN (+4) | XPP1_HUMAN   | XPNPEP1 | Q9NQW7 | Xaa-Pro aminopeptidase 1 (EC 3.4.11.9) (Aminoacylproline aminopeptidase) (Cytosolic aminopeptidase P) (Soluble aminopeptidase P) (sAmp) (X-Pro aminopeptidase 1) (X-prolyl aminopeptidase 1, soluble)                             | 70 kDa  | 0.26 | 21 | 7  | 14 | 1  | 1 | 1 | 4 | 3  | 6  | 2  | 3  | 2.069807567 | 0% (0.057)   |
| RAB5C_HUMAN       | B3KQF0_HUMAN |         | B3KQF0 | cDNA FLJ90354 fis, clone NT2RP2003390, highly similar to Translocation protein SEC63 homolog                                                                                                                                      | 88 kDa  | 0.39 | 69 | 24 | 45 | 11 | 3 | 5 | 6 | 5  | 5  | 7  | 28 | 2.051461156 | 95% (0.0018) |
| STT3B_HUMAN       | SAHH_HUMAN   | AHCY    | P23526 | Adenosylhomocysteinase (AdoHcyase) (EC 3.3.1.1) (S-adenosyl-L-homocysteine hydrolase)                                                                                                                                             | 48 kDa  | 0.14 | 32 | 11 | 21 | 0  | 3 | 2 | 8 | 6  | 8  | 4  | 2  | 2.03389918  | 95% (0.027)  |
| FUMH_HUMAN        | A8K6A7_HUMAN |         | A8K6A7 | cDNA FLJ76867, highly similar to Homo sapiens mannosidase, alpha, class 2B, member 1 (MAN2B1), mRNA                                                                                                                               | 114 kDa | 0.22 | 32 | 11 | 21 | 0  | 6 | 6 | 0 | 0  | 0  | 10 | 11 | 2.03389918  | 95% (0.027)  |
| IDH3B_HUMAN       | A8K3C3_HUMAN |         | A8K3C3 | T-complex protein 1 subunit delta                                                                                                                                                                                                 | 58 kDa  | 0.24 | 76 | 27 | 50 | 6  | 8 | 6 | 7 | 23 | 12 | 11 | 4  | 2.031902541 | 95% (0.0012) |
| F8W1A4_HUMAN (+1) | RMD3_HUMAN   | RMDN3   | Q96TC7 | Regulator of microtubule dynamics protein 3 (RMD-3) (hRMD-3) (Cerebral protein 10) (Protein FAM82A2) (Protein FAM82C) (Protein tyrosine phosphatase-interacting protein 51)                                                       | 52 kDa  | 0.37 | 29 | 10 | 19 | 5  | 1 | 0 | 4 | 0  | 0  | 12 | 7  | 2.015584836 | 95% (0.035)  |

|                   |              |         |        |                                                                                                                                                                                                                                             |         |       |     |     |     |    |    |    |    |    |    |    |    |             |                |  |  |
|-------------------|--------------|---------|--------|---------------------------------------------------------------------------------------------------------------------------------------------------------------------------------------------------------------------------------------------|---------|-------|-----|-----|-----|----|----|----|----|----|----|----|----|-------------|----------------|--|--|
|                   |              |         |        | (TCPTP-interacting protein 51)                                                                                                                                                                                                              |         |       |     |     |     |    |    |    |    |    |    |    |    |             |                |  |  |
| ABD12_HUMAN       | MTX1_HUMAN   | MTX1    | Q13505 | Metaxin-1 (Mitochondrial outer membrane import complex protein 1)                                                                                                                                                                           | 51 kDa  | 0.19  | 29  | 10  | 19  | 3  | 0  | 0  | 7  | 6  | 4  | 5  | 4  | 2.015584836 | 95% (0.035)    |  |  |
| LRP1_HUMAN        | B4DZ67_HUMAN | NUP107  | B4DZ67 | Nuclear pore complex protein Nup107 (cDNA FLJ58739, highly similar to Nuclear pore complex protein Nup107)                                                                                                                                  | 103 kDa | 0.075 | 29  | 10  | 19  | 3  | 3  | 1  | 3  | 3  | 2  | 10 | 4  | 2.015584836 | 95% (0.035)    |  |  |
| H7BX11_HUMAN      | B4DT03_HUMAN |         | B4DT03 | cDNA FLJ61382, highly similar to Protein GPR89A                                                                                                                                                                                             | 51 kDa  | 0.16  | 15  | 5   | 10  | 3  | 0  | 1  | 1  | 2  | 4  | 2  | 2  | 2.015453339 | 0% (0.10)      |  |  |
| SYEP_HUMAN        | NMT1_HUMAN   | NMT1    | P30419 | Glycylpeptide N-tetradecanoyltransferase 1 (EC 2.3.1.97) (Myristoyl-CoA:protein N-myristoyltransferase 1) (NMT1) (Type I N-myristoyltransferase) (Peptide N-myristoyltransferase 1)                                                         | 57 kDa  | 0.15  | 15  | 5   | 10  | 0  | 1  | 0  | 4  | 4  | 4  | 2  | 0  | 2.015453339 | 0% (0.10)      |  |  |
| VINC_HUMAN        | B3KUY2_HUMAN | PTGES3  | B3KUY2 | Prostaglandin E synthase 3 (Cytosolic, isoform CRA_c (cDNA FLJ40895 fis, clone UTERU2002294, highly similar to Prostaglandin E synthase 3 (EC 5.3.99.3))                                                                                    | 19 kDa  | 0.18  | 15  | 5   | 10  | 0  | 1  | 1  | 3  | 3  | 5  | 2  | 0  | 2.015453339 | 0% (0.10)      |  |  |
| MGST1_HUMAN (+1)  | B4DZ28_HUMAN |         | B4DZ28 | cDNA FLJ53577, highly similar to pre-mRNA-splicing factor ATP-dependent RNA helicase DHX16 (EC 3.6.1.-)                                                                                                                                     | 112 kDa | 0.27  | 15  | 5   | 10  | 0  | 0  | 2  | 0  | 2  | 0  | 6  | 0  | 2.015453339 | 0% (0.10)      |  |  |
| SFXN1_HUMAN       | SYNE3_HUMAN  | SYNE3   | Q6ZM23 | Nesprin-3 (Nuclear envelope spectrin repeat protein 3)                                                                                                                                                                                      | 112 kDa | 0.37  | 2   | 0   | 1   | 0  | 0  | 0  | 1  | 0  | 0  | 1  | 0  | 2.015321876 | 0% (0.47)      |  |  |
| HUWE1_HUMAN       | A8KA74_HUMAN |         | A8KA74 | cDNA FLJ76065                                                                                                                                                                                                                               | 98 kDa  | 0.066 | 1   | 0   | 1   | 0  | 0  | 0  | 0  | 0  | 0  | 2  | 0  | 2.015321876 | 0% (0.47)      |  |  |
| EIF3A_HUMAN (+2)  | F208A_HUMAN  | FAM208A | Q9UK61 | Protein FAM208A (CTCL tumor antigen se89-1) (Retinoblastoma-associated protein RAPI40)                                                                                                                                                      | 189 kDa | 0.092 | 1   | 0   | 1   | 0  | 0  | 0  | 0  | 2  | 0  | 0  | 0  | 2.015321876 | 0% (0.47)      |  |  |
| A8K9T3_HUMAN (+2) | SR140_HUMAN  | U2SURP  | O15042 | U2 snRNP-associated SURP motif-containing protein (140 kDa Ser/Arg-rich domain protein) (U2-associated protein SR140)                                                                                                                       | 118 kDa | 0.29  | 51  | 18  | 33  | 2  | 5  | 4  | 7  | 8  | 4  | 12 | 9  | 1.992513468 | 95% (0.0085)   |  |  |
| ACOT9_HUMAN       | F1T02_HUMAN  | GOLGB1  | F1T02  | Golgin subfamily B member 1                                                                                                                                                                                                                 | 367 kDa | 0.29  | 48  | 17  | 31  | 5  | 5  | 6  | 1  | 13 | 1  | 12 | 5  | 1.978934203 | 95% (0.011)    |  |  |
| B9EJA8_HUMAN (+1) | PCNA_HUMAN   | PCNA    | P12004 | Proliferating cell nuclear antigen (PCNA) (Cyclin)                                                                                                                                                                                          | 29 kDa  | 0.2   | 12  | 4   | 8   | 0  | 1  | 1  | 2  | 2  | 3  | 2  | 1  | 1.972766827 | 0% (0.14)      |  |  |
| ARP3_HUMAN        | INO1_HUMAN   | ISYNA1  | Q9NPH2 | Inositol-3-phosphate synthase 1 (IPS 1) (EC 5.5.1.4) (Myo-inositol 1-phosphate synthase) (MI-1-P synthase) (MIP synthase) (hIPS) (Myo-inositol 1-phosphate synthase A1) (hINO1)                                                             | 61 kDa  | 0.22  | 12  | 4   | 8   | 0  | 0  | 0  | 4  | 2  | 4  | 2  | 0  | 1.972766827 | 0% (0.14)      |  |  |
| SYK_HUMAN         | 5NTC_HUMAN   | NT5C2   | P49902 | Cytosolic purine 5'-nucleotidase (EC 3.1.3.5) (Cytosolic 5'-nucleotidase II)                                                                                                                                                                | 65 kDa  | 0.26  | 12  | 4   | 8   | 2  | 0  | 0  | 2  | 0  | 7  | 0  | 1  | 1.972766827 | 0% (0.14)      |  |  |
| AL3A2_HUMAN       | CO4B_HUMAN   | C4B     | P0C0L5 | Complement C4-B (Basic complement C4) (C3 and PZP-like alpha-2-macroglobulin domain-containing protein 3) [Cleaved into: Complement C4 beta chain; Complement C4-B alpha chain; C4a anaphylatoxin; C4b-B; C4d-B; Complement C4 gamma chain] | 193 kDa | 0.23  | 34  | 12  | 22  | 0  | 2  | 2  | 8  | 3  | 0  | 17 | 3  | 1.96491262  | 95% (0.029)    |  |  |
| UFL1_HUMAN        | TFR1_HUMAN   | TFRC    | P02786 | Transferrin receptor protein 1 (TR) (TfR) (TfR1) (TfRf) (T9) (p90) (CD antigen CD71) [Cleaved into: Transferrin receptor protein 1, serum form (sTfR)]                                                                                      | 85 kDa  | 0.17  | 322 | 117 | 205 | 29 | 34 | 37 | 20 | 59 | 36 | 47 | 65 | 1.955634563 | 95% (<0.00010) |  |  |
| E7EX73_HUMAN      | A8K64_HUMAN  |         | A8K64  | cDNA FLJ76877, highly similar to Homo sapiens superkiller viralicidic activity 2-like 2 (SKIV2L2), mRNA                                                                                                                                     | 118 kDa | 0.14  | 42  | 15  | 27  | 4  | 4  | 4  | 3  | 4  | 1  | 12 | 10 | 1.946774972 | 95% (0.019)    |  |  |
| B4DKN9_HUMAN (+1) | PCKGC_HUMAN  | PCK1    | P35558 | Phosphoenolpyruvate carboxykinase, cytosolic [GTP] (PEPCK-C) (EC 4.1.1.32)                                                                                                                                                                  | 69 kDa  | 0.34  | 31  | 11  | 20  | 0  | 0  | 0  | 0  | 2  | 12 | 4  | 3  | 1.942460031 | 95% (0.038)    |  |  |

|                   |              |        |        |                                                                                                                                                                                                                                                                                                                                                                                                                                                                    |         |      |     |     |     |    |    |    |    |    |    |    |    |  |  |  |  |  |  |  |  |  |  |  |  |  |  |  |  |             |              |                 |           |
|-------------------|--------------|--------|--------|--------------------------------------------------------------------------------------------------------------------------------------------------------------------------------------------------------------------------------------------------------------------------------------------------------------------------------------------------------------------------------------------------------------------------------------------------------------------|---------|------|-----|-----|-----|----|----|----|----|----|----|----|----|--|--|--|--|--|--|--|--|--|--|--|--|--|--|--|--|-------------|--------------|-----------------|-----------|
|                   |              |        |        | (Phosphoenolpyruvate carboxylase)                                                                                                                                                                                                                                                                                                                                                                                                                                  |         |      |     |     |     |    |    |    |    |    |    |    |    |  |  |  |  |  |  |  |  |  |  |  |  |  |  |  |  |             |              |                 |           |
| HNRPF_HUMAN       | A8K9W7_HUMAN |        | A8K9W7 | cDNA FLJ77440, highly similar to Homo sapiens general transcription factor II, i (GTF2I), transcript variant 2, mRNA                                                                                                                                                                                                                                                                                                                                               | 110 kDa | 0.27 | 60  | 22  | 39  | 3  | 7  | 4  | 7  | 20 | 3  | 8  | 7  |  |  |  |  |  |  |  |  |  |  |  |  |  |  |  |  | 1.938784453 | 95% (0.0059) |                 |           |
| B4DRA0_HUMAN (+1) | A8K6Q8_HUMAN |        | A8K6Q8 | cDNA FLJ75881, highly similar to Homo sapiens transferrin receptor (p90, CD71) (TFRC), mRNA                                                                                                                                                                                                                                                                                                                                                                        | 85 kDa  | 0.26 | 325 | 119 | 206 | 32 | 0  | 0  | 0  | 59 | 37 | 48 | 64 |  |  |  |  |  |  |  |  |  |  |  |  |  |  |  |  |             | 1.932410728  | 95% (< 0.00010) |           |
| ATPO_HUMAN        | FAS_HUMAN    | FASN   | P49327 | Fatty acid synthase (EC 2.3.1.85) [Includes: [Acyl-carrier-protein] S-acetyltransferase (EC 2.3.1.38); [Acyl-carrier-protein] S-malonyltransferase (EC 2.3.1.39); 3-oxoacyl-[acyl-carrier-protein] synthase (EC 2.3.1.41); 3-oxoacyl-[acyl-carrier-protein] reductase (EC 1.1.1.100); 3-hydroxyacyl-[acyl-carrier-protein] dehydratase (EC 4.2.1.59); Enoyl-[acyl-carrier-protein] reductase (EC 1.3.1.39); Oleoyl-[acyl-carrier-protein] hydrolase (EC 3.1.2.14)] | 273 kDa | 0.46 | 205 | 75  | 130 | 6  | 28 | 25 | 16 | 43 | 52 | 26 | 7  |  |  |  |  |  |  |  |  |  |  |  |  |  |  |  |  |             | 1.92894273   | 95% (< 0.00010) |           |
| ASPH_HUMAN        | XPO2_HUMAN   | CSE1L  | P55060 | Exportin-2 (Exp2) (Cellular apoptosis susceptibility protein) (Chromosome segregation 1-like protein) (Importin-alpha re-exporter)                                                                                                                                                                                                                                                                                                                                 | 110 kDa | 0.18 | 90  | 32  | 56  | 3  | 8  | 10 | 11 | 26 | 17 | 12 | 5  |  |  |  |  |  |  |  |  |  |  |  |  |  |  |  |  |             | 1.928505577  | 95% (0.0013)    |           |
| Q53GW1_HUMAN (+1) | B3KNN9_HUMAN |        | B3KNN9 | cDNA FLJ30070 fis, clone ASTRO2000046, highly similar to CD166 ANTIGEN                                                                                                                                                                                                                                                                                                                                                                                             | 62 kDa  | 0.21 | 29  | 10  | 18  | 6  | 1  | 3  | 0  | 6  | 0  | 7  | 6  |  |  |  |  |  |  |  |  |  |  |  |  |  |  |  |  |             | 1.916022214  | 0% (0.051)      |           |
| Q2TU34_HUMAN      | K7ES61_HUMAN | MRPL4  | K7ES61 | 39S ribosomal protein L4, mitochondrial (Fragment)                                                                                                                                                                                                                                                                                                                                                                                                                 | 34 kDa  | 0.33 | 28  | 10  | 18  | 5  | 4  | 0  | 1  | 8  | 2  | 4  | 4  |  |  |  |  |  |  |  |  |  |  |  |  |  |  |  |  |             | 1.916022214  | 0% (0.051)      |           |
| A8K781_HUMAN (+2) | CKAP5_HUMAN  | CKAP5  | Q14008 | Cytoskeleton-associated protein 5 (Colonic and hepatic tumor overexpressed gene protein) (Ch-TOG)                                                                                                                                                                                                                                                                                                                                                                  | 226 kDa | 0.29 | 9   | 3   | 6   | 0  | 1  | 2  | 0  | 0  | 4  | 1  | 1  |  |  |  |  |  |  |  |  |  |  |  |  |  |  |  |  |             | 1.910009327  | 0% (0.20)       |           |
| SYRC_HUMAN        | CBPM_HUMAN   | CPM    | P14384 | Carboxypeptidase M (CPM) (EC 3.4.17.12)                                                                                                                                                                                                                                                                                                                                                                                                                            | 51 kDa  | 0.32 | 9   | 3   | 6   | 0  | 1  | 1  | 1  | 3  | 2  | 0  | 1  |  |  |  |  |  |  |  |  |  |  |  |  |  |  |  |  |             | 1.910009327  | 0% (0.20)       |           |
| CBX3_HUMAN        | MRP4_HUMAN   | ABCC4  | O15439 | Multidrug resistance-associated protein 4 (ATP-binding cassette sub-family C member 4) (MRP/cMOAT-related ABC transporter) (Multi-specific organic anion transporter B) (MOAT-B)                                                                                                                                                                                                                                                                                   | 150 kDa | 0.3  | 9   | 3   | 6   | 0  | 1  | 2  | 0  | 1  | 1  | 4  | 0  |  |  |  |  |  |  |  |  |  |  |  |  |  |  |  |  |             | 1.910009327  | 0% (0.20)       |           |
| D9HTE9_HUMAN (+2) | ANM5_HUMAN   | PRMT5  | O14744 | Protein arginine N-methyltransferase 5 (EC 2.1.1.-) (72 kDa ICln-binding protein) (Histone-arginine N-methyltransferase PRMT5) (EC 2.1.1.125) (Jak-binding protein 1) (Shk1 kinase-binding protein 1 homolog) (SKB1 homolog) (SKB1Hs) [Cleaved into: Protein arginine N-methyltransferase 5, N-terminally processed]                                                                                                                                               | 73 kDa  | 0.28 | 9   | 3   | 6   | 1  | 0  | 0  | 2  | 2  | 3  | 1  | 0  |  |  |  |  |  |  |  |  |  |  |  |  |  |  |  |  |             |              | 1.910009327     | 0% (0.20) |
| A8K132_HUMAN (+1) | NAGAB_HUMAN  | NAGA   | P17050 | Alpha-N-acetylgalactosaminidase (EC 3.2.1.49) (Alpha-galactosidase B)                                                                                                                                                                                                                                                                                                                                                                                              | 47 kDa  | 0.25 | 9   | 3   | 6   | 0  | 1  | 2  | 0  | 1  | 0  | 5  | 0  |  |  |  |  |  |  |  |  |  |  |  |  |  |  |  |  |             |              | 1.910009327     | 0% (0.20) |
| DJB11_HUMAN       | EI2BE_HUMAN  | EIF2B5 | Q13144 | Translation initiation factor eIF-2B subunit epsilon (eIF-2B GDP-GTP exchange factor subunit epsilon)                                                                                                                                                                                                                                                                                                                                                              | 80 kDa  | 0.2  | 9   | 3   | 6   | 0  | 1  | 1  | 1  | 4  | 2  | 0  | 0  |  |  |  |  |  |  |  |  |  |  |  |  |  |  |  |  |             |              | 1.910009327     | 0% (0.20) |
| B4DJQ5_HUMAN (+2) | B7ZLZ2_HUMAN | EDEM3  | B7ZLZ2 | ER degradation-enhancing alpha-mannosidase-like protein 3 (Uncharacterized protein)                                                                                                                                                                                                                                                                                                                                                                                | 102 kDa | 0.2  | 9   | 3   | 6   | 0  | 3  | 0  | 0  | 1  | 1  | 3  | 1  |  |  |  |  |  |  |  |  |  |  |  |  |  |  |  |  |             |              | 1.910009327     | 0% (0.20) |
| GBB2_HUMAN        | EF1B_HUMAN   | EEF1B2 | P24534 | Elongation factor 1-beta (EF-1-beta)                                                                                                                                                                                                                                                                                                                                                                                                                               | 25 kDa  | 0.28 | 9   | 3   | 6   | 0  | 1  | 1  | 1  | 1  | 2  | 2  | 1  |  |  |  |  |  |  |  |  |  |  |  |  |  |  |  |  |             |              | 1.910009327     | 0% (0.20) |

|                        |                   |          |        |                                                                                                                                                                                             |         |      |     |     |     |    |    |    |    |    |    |    |    |                 |                    |
|------------------------|-------------------|----------|--------|---------------------------------------------------------------------------------------------------------------------------------------------------------------------------------------------|---------|------|-----|-----|-----|----|----|----|----|----|----|----|----|-----------------|--------------------|
| SNAA_HUMAN             | E9PHV4_HUMAN      | POLR2D   | E9PHV4 | DNA-directed RNA polymerase II subunit RPB4                                                                                                                                                 | 13 kDa  | 0.39 | 9   | 3   | 6   | 0  | 2  | 1  | 0  | 0  | 0  | 4  | 2  | 1.910093<br>27  | 0%<br>(0.20)       |
| PSD13_HUMAN<br>(+1)    | IDI1_HUMAN        | IDI1     | Q13907 | Isopentenyl-diphosphate Delta-isomerase 1 (EC 5.3.3.2) (Isopentenyl pyrophosphate isomerase 1) (IPP isomerase 1) (IPPI)                                                                     | 26 kDa  | 0.31 | 17  | 6   | 11  | 1  | 3  | 1  | 1  | 4  | 3  | 1  | 3  | 1.8919035<br>53 | 0%<br>(0.11)       |
| MLEC_HUMAN             | E9PDC5_HUMAN      | PTPRS    | E9PDC5 | Receptor-type tyrosine-protein phosphatase S                                                                                                                                                | 217 kDa | 0.33 | 17  | 6   | 11  | 0  | 0  | 0  | 0  | 6  | 0  | 0  | 2  | 1.8919035<br>53 | 0%<br>(0.11)       |
| NPM_HUMAN              | D3DP46_HUMAN      | SPCS3    | D3DP46 | Signal peptidase complex subunit 3 homolog (S. cerevisiae), isoform CRA_a                                                                                                                   | 20 kDa  | 0.2  | 25  | 9   | 16  | 3  | 1  | 2  | 3  | 2  | 6  | 5  | 3  | 1.8844327<br>6  | 0%<br>(0.067)      |
| Q567R6_HUMAN<br>(+1)   | Q4LE48_HUMAN      | STAG1    | Q4LE48 | STAG1 variant protein (Fragment)                                                                                                                                                            | 146 kDa | 0.61 | 25  | 9   | 16  | 0  | 3  | 0  | 0  | 6  | 0  | 7  | 3  | 1.8844327<br>6  | 0%<br>(0.067)      |
| OXLA_HUMAN             | A8MXP9_HUMAN      | MATR3    | A8MXP9 | Matrin-3                                                                                                                                                                                    | 100 kDa | 0.21 | 107 | 40  | 68  | 4  | 11 | 10 | 15 | 14 | 8  | 33 | 13 | 1.8804563<br>48 | 95%<br>(0.0064)    |
| ITAM_HUMAN             | B4DDT3_HUMAN      |          | B4DDT3 | cDNA FLJ54622, highly similar to Prothrombin (EC 3.4.21.5)                                                                                                                                  | 53 kDa  | 0.2  | 41  | 15  | 26  | 0  | 6  | 4  | 6  | 4  | 11 | 3  | 8  | 1.8778355<br>62 | 95%<br>(0.026)     |
| Q5VU59_HUMAN<br>N      | H0Y4R1_HUMAN      | IMPDH2   | H0Y4R1 | Inosine-5'-monophosphate dehydrogenase 2 (Fragment)                                                                                                                                         | 51 kDa  | 0.46 | 49  | 18  | 31  | 0  | 1  | 0  | 17 | 7  | 21 | 1  | 1  | 1.8761083<br>17 | 95%<br>(0.017)     |
| HEAT1_HUMAN<br>N       | A8K492_HUMAN<br>N |          | A8K492 | cDNA FLJ76789, highly similar to Homo sapiens methionine-tRNA synthetase (MARS), mRNA                                                                                                       | 101 kDa | 0.13 | 65  | 24  | 41  | 5  | 8  | 4  | 7  | 14 | 17 | 7  | 3  | 1.8739295<br>97 | 95%<br>(0.0068)    |
| COPG1_HUMAN<br>N       | B2RBR9_HUMAN<br>N |          | B2RBR9 | cDNA, FLJ95650, highly similar to Homo sapiens karyopherin (importin) beta 1 (KPNA1), mRNA                                                                                                  | 97 kDa  | 0.27 | 177 | 66  | 111 | 8  | 16 | 23 | 19 | 26 | 24 | 41 | 21 | 1.8701881<br>15 | 95% (<<br>0.00010) |
| E9PLK3_HUMAN<br>(+1)   | MBB1A_HUMAN<br>N  | MYBBP1A  | Q9BQG0 | Myb-binding protein 1A                                                                                                                                                                      | 149 kDa | 0.23 | 94  | 35  | 59  | 2  | 8  | 8  | 17 | 17 | 14 | 22 | 6  | 1.8616074<br>51 | 95%<br>(0.0016)    |
| B3AT_HUMAN<br>(+3)     | HS90A_HUMAN       | HSP90AA1 | P07900 | Heat shock protein HSP 90-alpha (Heat shock 86 kDa) (HSP 86) (HSP86) (Renal carcinoma antigen NY-REN-38)                                                                                    | 85 kDa  | 0.16 | 437 | 164 | 273 | 19 | 47 | 40 | 59 | 64 | 94 | 73 | 43 | 1.8615024<br>48 | 95% (<<br>0.00010) |
| CHI0_HUMAN             | PSIP1_HUMAN       | PSIP1    | O75475 | PC4 and SFRS1-interacting protein (CLL-associated antigen KW-7) (Dense fine speckles 70 kDa protein) (DFS 70) (Lens epithelium-derived growth factor) (Transcriptional coactivator p75/p52) | 60 kDa  | 0.7  | 46  | 17  | 29  | 1  | 6  | 6  | 4  | 11 | 2  | 10 | 6  | 1.8561561<br>78 | 95%<br>(0.021)     |
| J3KRX5_HUMAN<br>(+2)   | ERG7_HUMAN        | LSS      | P48449 | Lanosterol synthase (EC 5.4.99.7) (2,3-epoxysqualene--lanosterol cyclase) (Oxidosqualene--lanosterol cyclase) (OSC) (hOSC)                                                                  | 83 kDa  | 0.29 | 39  | 14  | 24  | 2  | 4  | 7  | 1  | 19 | 0  | 2  | 4  | 1.8540824<br>32 | 95%<br>(0.034)     |
| RS13_HUMAN             | CADHI_HUMAN<br>N  | CDHI     | P12830 | Cadherin-1 (CAM 120/80) (Epithelial cadherin) (E-cadherin) (Uvomorulin) (CD antigen CD324) [Cleaved into: E-Cad/CTF1; E-Cad/CTF2; E-Cad/CTF3]                                               | 97 kDa  | 0.46 | 30  | 11  | 19  | 5  | 2  | 2  | 2  | 7  | 2  | 3  | 7  | 1.8510235<br>13 | 0%<br>(0.054)      |
| A0S3T1_HUMAN<br>(+113) | DHC24_HUMAN<br>N  | DHCR24   | Q15392 | Delta(24)-sterol reductase (EC 1.3.1.72) (24-dehydrocholesterol reductase) (3-beta-hydroxysterol delta-24-reductase) (Diminuto/dwarf1 homolog) (Seladin-1)                                  | 60 kDa  | 0.19 | 79  | 30  | 50  | 4  | 9  | 3  | 14 | 15 | 11 | 16 | 8  | 1.8367690<br>74 | 95%<br>(0.0039)    |
| B4DLT2_HUMAN<br>(+1)   | DNJA1_HUMAN<br>N  | DNJA1    | P31689 | DnaJ homolog subfamily A member 1 (DnaJ protein homolog 2) (HSDJ) (Heat shock 40 kDa protein 4) (Heat shock protein J2) (HSJ-2) (Human DnaJ protein 2) (hDj-2)                              | 45 kDa  | 0.13 | 15  | 5   | 9   | 0  | 1  | 2  | 2  | 4  | 2  | 0  | 3  | 1.8362755<br>13 | 0%<br>(0.15)       |
| EMC1_HUMAN             | B4DEL5_HUMAN<br>N |          | B4DEL5 | cDNA FLJ57874, highly similar to Homo sapiens succinate dehydrogenase complex, subunit C, transcript variant 3, mRNA                                                                        | 15 kDa  | 0.16 | 14  | 5   | 9   | 1  | 0  | 0  | 5  | 4  | 2  | 2  | 1  | 1.8362755<br>13 | 0%<br>(0.15)       |
| J3KTL2_HUMAN<br>(+1)   | B4E259_HUMAN<br>N |          | B4E259 | cDNA FLJ59607, moderately similar to D-dopachrome decarboxylase (EC 4.1.1.84) (cDNA, FLJ78842, moderately                                                                                   | 25 kDa  | 0.39 | 14  | 5   | 9   | 0  | 2  | 3  | 0  | 4  | 3  | 2  | 0  | 1.8362755<br>13 | 0%<br>(0.15)       |

|                   |              |         |        |                                                                                                                                                                                                              |         |       |     |    |     |    |    |    |    |    |    |    |    |             |                |
|-------------------|--------------|---------|--------|--------------------------------------------------------------------------------------------------------------------------------------------------------------------------------------------------------------|---------|-------|-----|----|-----|----|----|----|----|----|----|----|----|-------------|----------------|
|                   |              |         |        | similar to D-dopachrome decarboxylase (EC 4.1.1.84))                                                                                                                                                         |         |       |     |    |     |    |    |    |    |    |    |    |    |             |                |
| PDC6L_HUMAN (+1)  | WDR43_HUMAN  | WDR43   | Q15061 | WD repeat-containing protein 43                                                                                                                                                                              | 75 kDa  | 0.23  | 14  | 5  | 9   | 1  | 1  | 2  | 2  | 5  | 1  | 2  | 1  | 1.836275513 | 0% (0.15)      |
| S10A8_HUMAN       | B2R9L0_HUMAN |         | B2R9L0 | cDNA, FLJ94443, highly similar to Homo sapiens NADH dehydrogenase (ubiquinone) 1 beta subcomplex, 5, 16kDa (NDUFB5), mRNA                                                                                    | 22 kDa  | 0.69  | 14  | 5  | 9   | 3  | 0  | 1  | 1  | 3  | 2  | 4  | 0  | 1.836275513 | 0% (0.15)      |
| RL15_HUMAN        | ARPC5_HUMAN  | ARPC5   | O15511 | Actin-related protein 2/3 complex subunit 5 (Arp2/3 complex 16 kDa subunit) (p16-ARPC)                                                                                                                       | 16 kDa  | 0.38  | 14  | 5  | 9   | 1  | 1  | 2  | 1  | 2  | 3  | 2  | 2  | 1.836275513 | 0% (0.15)      |
| B3KNN7_HUMAN (+3) | Q6FHJ5_HUMAN | SCAMP3  | Q6FHJ5 | SCAMP3 protein (Fragment)                                                                                                                                                                                    | 38 kDa  | 0.27  | 14  | 5  | 9   | 2  | 0  | 3  | 0  | 1  | 2  | 2  | 4  | 1.836275513 | 0% (0.15)      |
| RAB18_HUMAN       | B2R6P1_HUMAN |         | B2R6P1 | cDNA, FLJ93045, highly similar to Homo sapiens galactosamine (N-acetyl)-6-sulfate sulfatase (Morquio syndrome, mucopolysaccharidosis type IVA) (GALNS), mRNA                                                 | 58 kDa  | 0.49  | 14  | 5  | 9   | 5  | 0  | 0  | 0  | 2  | 0  | 4  | 3  | 1.836275513 | 0% (0.15)      |
| RAB1A_HUMAN       | OSTC_HUMAN   | OSTC    | Q9NRP0 | Oligosaccharyltransferase complex subunit OSTC (Hydrophobic protein HSF-28)                                                                                                                                  | 17 kDa  | 0.5   | 14  | 5  | 9   | 1  | 1  | 1  | 2  | 1  | 4  | 2  | 2  | 1.836275513 | 0% (0.15)      |
| B3KMV8_HUMAN (+1) | Q86X36_HUMAN | DHX8    | Q86X36 | DEAH (Asp-Glu-Ala-His) box polypeptide 8                                                                                                                                                                     | 139 kDa | 0.26  | 14  | 5  | 9   | 0  | 2  | 0  | 0  | 2  | 0  | 4  | 3  | 1.836275513 | 0% (0.15)      |
| J9JID7_HUMAN (+1) | KCRB_HUMAN   | CKB     | P12277 | Creatine kinase B-type (EC 2.7.3.2) (B-CK) (Creatine kinase B chain)                                                                                                                                         | 43 kDa  | 0.31  | 43  | 16 | 27  | 2  | 2  | 1  | 11 | 14 | 6  | 6  | 2  | 1.833894886 | 95% (0.028)    |
| B2RB06_HUMAN (+3) | PRS7_HUMAN   | PSMC2   | P35998 | 26S protease regulatory subunit 7 (26S proteasome AAA-ATPase subunit RPT1) (Proteasome 26S subunit ATPase 2) (Protein MSS1)                                                                                  | 49 kDa  | 0.16  | 57  | 21 | 35  | 1  | 6  | 5  | 9  | 7  | 19 | 8  | 1  | 1.824505497 | 95% (0.015)    |
| BGAL_HUMAN (+2)   | F5H897_HUMAN | TRAP1   | F5H897 | Heat shock protein 75 kDa, mitochondrial                                                                                                                                                                     | 74 kDa  | 0.19  | 209 | 79 | 129 | 17 | 27 | 20 | 15 | 64 | 16 | 25 | 25 | 1.818712119 | 95% (<0.00010) |
| D3DPU2_HUMAN      | NOP2_HUMAN   | NOP2    | P46087 | Putative ribosomal RNA methyltransferase NOP2 (EC 2.1.1.-) (Nucleolar protein 1) (Nucleolar protein 2 homolog) (Proliferating-cell nucleolar antigen p120) (Proliferation-associated nucleolar protein p120) | 89 kDa  | 0.21  | 28  | 10 | 17  | 1  | 3  | 3  | 3  | 4  | 6  | 5  | 3  | 1.816462457 | 0% (0.072)     |
| KAD3_HUMAN (+1)   | LARP7_HUMAN  | LARP7   | Q4G0J3 | La-related protein 7 (La ribonucleoprotein domain family member 7) (P-TEFb-interaction protein for 7SK stability) (PIPT5)                                                                                    | 67 kDa  | 0.55  | 6   | 2  | 4   | 0  | 0  | 2  | 0  | 2  | 0  | 1  | 1  | 1.808653774 | 0% (0.29)      |
| H3BPE1_HUMAN (+1) | WDR3_HUMAN   | WDR3    | Q9UNX4 | WD repeat-containing protein 3                                                                                                                                                                               | 106 kDa | 0.035 | 4   | 2  | 4   | 0  | 0  | 1  | 1  | 3  | 0  | 0  | 0  | 1.808653774 | 0% (0.29)      |
| B4DLN1_HUMAN      | A8K8E1_HUMAN | TBC1D15 | A8K8E1 | TBC1 domain family member 15 (TBC1 domain family, member 15, isoform CRA_d) (cDNA FLJ77374)                                                                                                                  | 52 kDa  | 0.33  | 6   | 2  | 4   | 0  | 1  | 1  | 0  | 2  | 2  | 0  | 0  | 1.808653774 | 0% (0.29)      |
| B4DRS6_HUMAN      | B4DS83_HUMAN |         | B4DS83 | cDNA FLJ53179, highly similar to Nucleolar protein 10                                                                                                                                                        | 74 kDa  | 0.38  | 6   | 2  | 4   | 0  | 1  | 1  | 0  | 2  | 1  | 1  | 0  | 1.808653774 | 0% (0.29)      |
| A8K651_HUMAN (+1) | FA5_HUMAN    | F5      | P12259 | Coagulation factor V (Activated protein C cofactor) (Proaccelerin, labile factor) [Cleaved into: Coagulation factor V heavy chain; Coagulation factor V light chain]                                         | 252 kDa | 0.15  | 6   | 2  | 4   | 0  | 1  | 0  | 1  | 0  | 4  | 0  | 0  | 1.808653774 | 0% (0.29)      |
| Q9BTQ7_HUMAN (+1) | PEX16_HUMAN  | PEX16   | Q9YSY5 | Peroxisomal membrane protein PEX16 (Peroxin-16) (Peroxisomal biogenesis factor 16)                                                                                                                           | 39 kDa  | 0.4   | 6   | 2  | 4   | 0  | 0  | 0  | 2  | 0  | 2  | 1  | 1  | 1.808653774 | 0% (0.29)      |
| B4DSE2_HUMAN (+4) | RPRD2_HUMAN  | RPRD2   | Q5VT52 | Regulation of nuclear pre-mRNA domain-containing protein 2                                                                                                                                                   | 156 kDa | 0.16  | 6   | 2  | 4   | 0  | 0  | 1  | 1  | 0  | 0  | 4  | 0  | 1.808653774 | 0% (0.29)      |
| ARM10_HUMAN       | ACSA_HUMAN   | ACSS2   | Q9NR19 | Acetyl-coenzyme A synthetase, cytoplasmic (EC 6.2.1.1) (Acetate-CoA ligase) (Acetyl-CoA synthetase) (ACS) (AceCS) (Acyl-CoA                                                                                  | 79 kDa  | 0.33  | 6   | 2  | 4   | 0  | 1  | 1  | 0  | 2  | 1  | 1  | 0  | 1.808653774 | 0% (0.29)      |

|                   |              |        |        |                                                                                                                                                                                                                                                                                                                                                                                                  |        |       |     |    |    |   |    |    |    |    |    |    |             |             |              |
|-------------------|--------------|--------|--------|--------------------------------------------------------------------------------------------------------------------------------------------------------------------------------------------------------------------------------------------------------------------------------------------------------------------------------------------------------------------------------------------------|--------|-------|-----|----|----|---|----|----|----|----|----|----|-------------|-------------|--------------|
|                   |              |        |        | synthetase short-chain family member 2) (Acyl-activating enzyme)                                                                                                                                                                                                                                                                                                                                 |        |       |     |    |    |   |    |    |    |    |    |    |             |             |              |
| Q59H06_HUMAN (+1) | A8K6U0_HUMAN |        | A8K6U0 | cDNA FLJ77572, highly similar to Homo sapiens intracellular membrane-associated calcium-independent phospholipase A2 gamma (IPLA2(GAMMA)), mRNA                                                                                                                                                                                                                                                  | 89 kDa | 0.12  | 6   | 2  | 4  | 0 | 1  | 1  | 0  | 0  | 1  | 3  | 1.808653774 | 0% (0.29)   |              |
| B2R4C0_HUMAN (+2) | B4DP38_HUMAN | WDR77  | B4DP38 | Methylome protein 50 (cDNA FLJ55120, moderately similar to Methylome protein 50)                                                                                                                                                                                                                                                                                                                 | 30 kDa | 0.38  | 6   | 2  | 4  | 0 | 1  | 0  | 1  | 0  | 2  | 0  | 2           | 1.808653774 | 0% (0.29)    |
| CBR1_HUMAN        | B2RAH7_HUMAN |        | B2RAH7 | cDNA, FLJ94921, highly similar to Homo sapiens prolyl endopeptidase (PREP), mRNA                                                                                                                                                                                                                                                                                                                 | 81 kDa | 0.54  | 6   | 2  | 4  | 0 | 0  | 2  | 0  | 0  | 3  | 1  | 0           | 1.808653774 | 0% (0.29)    |
| ODPA_HUMAN        | VANG1_HUMAN  | VANGL1 | Q8TAA9 | Vang-like protein 1 (Loop-tail protein 2 homolog) (LPP2) (Strabismus 2) (Van Gogh-like protein 1)                                                                                                                                                                                                                                                                                                | 60 kDa | 0.25  | 6   | 2  | 4  | 0 | 0  | 0  | 2  | 0  | 2  | 2  | 0           | 1.808653774 | 0% (0.29)    |
| SAM50_HUMAN       | AIFM2_HUMAN  | AIFM2  | Q9BRQ8 | Apoptosis-inducing factor 2 (EC 1.-.-.-) (Apoptosis-inducing factor homologous mitochondrion-associated inducer of death) (Apoptosis-inducing factor-like mitochondrion-associated inducer of death) (p53-responsive gene 3 protein)                                                                                                                                                             | 41 kDa | 0.2   | 6   | 2  | 4  | 1 | 1  | 0  | 0  | 0  | 2  | 1  | 1           | 1.808653774 | 0% (0.29)    |
| RENT1_HUMAN       | B4DXB6_HUMAN |        | B4DXB6 | cDNA FLJ58335, highly similar to GPI transamidase component PIG-U                                                                                                                                                                                                                                                                                                                                | 48 kDa | 0.2   | 6   | 2  | 4  | 0 | 1  | 0  | 1  | 1  | 0  | 0  | 3           | 1.808653774 | 0% (0.29)    |
| M1VPF6_HUMAN      | VSIG4_HUMAN  | VSIG4  | Q9Y279 | V-set and immunoglobulin domain-containing protein 4 (Protein Z391g)                                                                                                                                                                                                                                                                                                                             | 44 kDa | 0.084 | 5   | 2  | 4  | 0 | 1  | 1  | 0  | 0  | 0  | 1  | 3           | 1.808653774 | 0% (0.29)    |
| TOIP1_HUMAN       | B2R9X3_HUMAN |        | B2R9X3 | cDNA, FLJ94599, highly similar to Homo sapiens GDP-mannose 4,6-dehydratase (GMDS), mRNA                                                                                                                                                                                                                                                                                                          | 42 kDa | 0.14  | 6   | 2  | 4  | 0 | 0  | 0  | 2  | 0  | 4  | 0  | 0           | 1.808653774 | 0% (0.29)    |
| TMM43_HUMAN       | SRPK2_HUMAN  | SRPK2  | P78362 | SRSF protein kinase 2 (EC 2.7.11.1) (SFRS protein kinase 2) (Serine/arginine-rich protein-specific kinase 2) (SR-protein-specific kinase 2) [Cleaved into: SRSF protein kinase 2 N-terminal; SRSF protein kinase 2 C-terminal]                                                                                                                                                                   | 78 kDa | 0.34  | 6   | 2  | 4  | 0 | 1  | 0  | 1  | 0  | 3  | 1  | 0           | 1.808653774 | 0% (0.29)    |
| B3KQF0_HUMAN (+1) | B4E2I4_HUMAN |        | B4E2I4 | cDNA FLJ58227, highly similar to Glutamate-cysteine ligase catalytic subunit (EC 6.3.2.2)                                                                                                                                                                                                                                                                                                        | 66 kDa | 0.24  | 6   | 2  | 4  | 0 | 0  | 2  | 0  | 1  | 0  | 3  | 0           | 1.808653774 | 0% (0.29)    |
| ERLN2_HUMAN       | ADCK3_HUMAN  | ADCK3  | Q8NI60 | Chaperone activity of bcl1 complex-like, mitochondrial (Chaperone-ABC1-like) (EC 2.7.11.-) (aarF domain-containing protein kinase 3)                                                                                                                                                                                                                                                             | 72 kDa | 0.4   | 6   | 2  | 4  | 1 | 1  | 0  | 0  | 4  | 0  | 0  | 0           | 1.808653774 | 0% (0.29)    |
| A8K5N5_HUMAN (+2) | D6RDJ3_HUMAN | POLR1C | D6RDJ3 | DNA-directed RNA polymerases I and III subunit RPAC1 (Fragment)                                                                                                                                                                                                                                                                                                                                  | 14 kDa | 0.22  | 5   | 2  | 4  | 0 | 1  | 0  | 1  | 1  | 2  | 1  | 0           | 1.808653774 | 0% (0.29)    |
| CLIC1_HUMAN (+1)  | FA98B_HUMAN  | FAM98B | Q52LJ0 | Protein FAM98B                                                                                                                                                                                                                                                                                                                                                                                   | 37 kDa | 0.4   | 6   | 2  | 4  | 0 | 0  | 0  | 2  | 1  | 0  | 0  | 0           | 1.808653774 | 0% (0.29)    |
| DX39A_HUMAN       | FKBP4_HUMAN  | FKBP4  | Q02790 | Peptidyl-prolyl cis-trans isomerase FKBP4 (PPIase FKBP4) (EC 5.2.1.8) (51 kDa FK506-binding protein) (FKBP51) (52 kDa FK506-binding protein) (52 kDa FKBP) (FKBP-52) (59 kDa immunophilin) (p59) (FK506-binding protein 4) (FKBP-4) (FKBP59) (HSP-binding immunophilin) (HBI) (Immunophilin FKBP52) (Rotamase) [Cleaved into: Peptidyl-prolyl cis-trans isomerase FKBP4, N-terminally processed] | 52 kDa | 0.29  | 112 | 43 | 70 | 1 | 16 | 11 | 15 | 12 | 41 | 13 | 4           | 1.803577396 | 95% (0.0010) |

|                  |              |          |        |                                                                                                                                                                                                                                     |         |      |     |    |    |   |   |   |    |    |    |    |   |             |              |
|------------------|--------------|----------|--------|-------------------------------------------------------------------------------------------------------------------------------------------------------------------------------------------------------------------------------------|---------|------|-----|----|----|---|---|---|----|----|----|----|---|-------------|--------------|
| AT131_HUMAN      | B3KY60_HUMAN |          | B3KY60 | cDNA FLJ16777 fis. clone BRHIP2029567, highly similar to Cell division cycle 5-like protein                                                                                                                                         | 92 kDa  | 0.15 | 19  | 7  | 12 | 1 | 2 | 2 | 2  | 5  | 0  | 4  | 3 | 1.798305649 | 0% (0.12)    |
| Q53G69_HUMAN(+2) | WDR36_HUMAN  | WDR36    | Q8NI36 | WD repeat-containing protein 36 (T-cell activation WD repeat-containing protein) (TA-WDRP)                                                                                                                                          | 105 kDa | 0.31 | 19  | 7  | 12 | 2 | 2 | 1 | 2  | 8  | 0  | 4  | 0 | 1.798305649 | 0% (0.12)    |
| RAP1A_HUMAN      | XPO1_HUMAN   | XPO1     | O14980 | Exportin-1 (Exp1) (Chromosome region maintenance 1 protein homolog)                                                                                                                                                                 | 123 kDa | 0.42 | 119 | 45 | 73 | 4 | 9 | 7 | 26 | 27 | 28 | 17 | 1 | 1.798272512 | 95% (0.0087) |
| ARPC2_HUMAN      | Q53GD7_HUMAN |          | Q53GD7 | FUS interacting protein (Serine-arginine rich) 1 isoform 2 variant (Fragment)                                                                                                                                                       | 31 kDa  | 0.32 | 36  | 14 | 23 | 4 | 2 | 2 | 6  | 5  | 5  | 4  | 9 | 1.780627802 | 95% (0.047)  |
| A8K3C3_HUMAN(+1) | CBR1_HUMAN   | CBR1     | P16152 | Carbonyl reductase [NADPH] 1 (EC 1.1.1.184) (15-hydroxyprostaglandin dehydrogenase [NADP(+)]) (EC 1.1.1.197) (NADPH-dependent carbonyl reductase 1) (Prostaglandin 9-ketoreductase) (Prostaglandin-E(2) 9-reductase) (EC 1.1.1.189) | 30 kDa  | 0.27 | 81  | 31 | 50 | 3 | 7 | 8 | 13 | 12 | 24 | 11 | 3 | 1.779792119 | 95% (0.0056) |
| FLOT2_HUMAN      | CUL4A_HUMAN  | CUL4A    | Q13619 | Cullin-4A (CUL-4A)                                                                                                                                                                                                                  | 88 kDa  | 0.35 | 24  | 9  | 15 | 1 | 3 | 4 | 1  | 7  | 1  | 5  | 2 | 1.77516474  | 0% (0.095)   |
| B2R7M1_HUMAN(+4) | RM37_HUMAN   | MRPL37   | Q9BZE1 | 39S ribosomal protein L37, mitochondrial (L37mt) (MRP-L37) (39S ribosomal protein L2, mitochondrial) (L2mt) (MRP-L2)                                                                                                                | 48 kDa  | 0.28 | 24  | 9  | 15 | 7 | 1 | 0 | 1  | 5  | 0  | 5  | 5 | 1.77516474  | 0% (0.095)   |
| TOM70_HUMAN      | VPP2_HUMAN   | ATP6V0A2 | Q9Y487 | V-type proton ATPase 116 kDa subunit a isoform 2 (V-ATPase 116 kDa isoform a2) (Lysosomal H(+)-transporting ATPase V0 subunit a2) (TJ6) (Vacuolar proton translocating ATPase 116 kDa subunit a isoform 2)                          | 98 kDa  | 0.11 | 24  | 9  | 15 | 4 | 3 | 1 | 1  | 4  | 4  | 2  | 5 | 1.77516474  | 0% (0.095)   |
| Q86VG2_HUMAN     | A1JUI8_HUMAN | CCT6A    | A1JUI8 | Chaperonin subunit 6A (Fragment)                                                                                                                                                                                                    | 54 kDa  | 0.16 | 42  | 16 | 26 | 1 | 4 | 6 | 5  | 5  | 13 | 5  | 2 | 1.768952797 | 95% (0.038)  |
| D6R9P3_HUMAN     | VWA8_HUMAN   | VWA8     | A3KMH1 | von Willebrand factor A domain-containing protein 8                                                                                                                                                                                 | 215 kDa | 0.27 | 11  | 4  | 7  | 2 | 1 | 1 | 0  | 6  | 0  | 0  | 1 | 1.759469425 | 0% (0.21)    |
| A8K7T4_HUMAN(+2) | ABCBA_HUMAN  | ABCB10   | Q9NRK6 | ATP-binding cassette sub-family B member 10, mitochondrial (ATP-binding cassette transporter 10) (ABC transporter 10 protein) (Mitochondrial ATP-binding cassette 2) (M-ABC2)                                                       | 79 kDa  | 0.27 | 12  | 4  | 7  | 1 | 1 | 1 | 0  | 2  | 3  | 0  | 3 | 1.759469425 | 0% (0.21)    |
| VAT1_HUMAN       | F8VY86_HUMAN | TP53BP1  | F8VY86 | Tumor suppressor p53-binding protein 1                                                                                                                                                                                              | 214 kDa | 0.22 | 11  | 4  | 7  | 1 | 0 | 0 | 2  | 2  | 0  | 2  | 2 | 1.759469425 | 0% (0.21)    |
| Q59GM9_HUMAN     | ES1_HUMAN    | C21orf33 | P30042 | ES1 protein homolog, mitochondrial (Protein GT335) (Protein KNP-1)                                                                                                                                                                  | 28 kDa  | 0.25 | 11  | 4  | 7  | 0 | 2 | 2 | 1  | 5  | 0  | 0  | 2 | 1.759469425 | 0% (0.21)    |
| LEG1_HUMAN       | FUCO2_HUMAN  | FUCA2    | Q9BTY2 | Plasma alpha-L-fucosidase (EC 3.2.1.51) (Alpha-L-fucosidase fucosidase 2) (Alpha-L-fucosidase 2)                                                                                                                                    | 54 kDa  | 0.44 | 11  | 4  | 7  | 2 | 1 | 1 | 0  | 3  | 0  | 3  | 1 | 1.759469425 | 0% (0.21)    |
| Q53EMS_HUMAN     | THOC1_HUMAN  | THOC1    | Q96FV9 | THO complex subunit 1 (Tho1) (Nuclear matrix protein p84) (p84N5) (hTRESX84)                                                                                                                                                        | 76 kDa  | 0.19 | 11  | 4  | 7  | 0 | 1 | 3 | 0  | 3  | 0  | 4  | 0 | 1.759469425 | 0% (0.21)    |
| M0R210_HUMAN(+1) | SRP68_HUMAN  | SRP68    | Q9UHB9 | Signal recognition particle subunit SRP68 (SRP68) (Signal recognition particle 68 kDa protein)                                                                                                                                      | 71 kDa  | 0.52 | 11  | 4  | 7  | 0 | 0 | 3 | 1  | 2  | 3  | 2  | 0 | 1.759469425 | 0% (0.21)    |
| K6PL_HUMAN       | B4DXJ1_HUMAN | SEC13    | B4DXJ1 | Protein SEC13 homolog (cDNA FLJ56334, highly similar to SEC13-related protein)                                                                                                                                                      | 41 kDa  | 0.22 | 11  | 4  | 7  | 1 | 1 | 1 | 1  | 1  | 2  | 3  | 2 | 1.759469425 | 0% (0.21)    |
| TCPA_HUMAN       | DUT_HUMAN    | DUT      | P33316 | Deoxyuridine 5'-triphosphate nucleotidohydrolase, mitochondrial (dUTPase) (EC 3.6.1.23) (dUTP pyrophosphatase)                                                                                                                      | 27 kDa  | 0.25 | 10  | 4  | 7  | 0 | 2 | 0 | 2  | 4  | 0  | 3  | 0 | 1.759469425 | 0% (0.21)    |
| D3DV26_HUMAN     | ECI2_HUMAN   | ECI2     | O75521 | Enoyl-CoA delta isomerase 2, mitochondrial (EC 5.3.3.8) (DRS-1) (Delta(3),delta(2)-                                                                                                                                                 | 44 kDa  | 0.13 | 34  | 13 | 21 | 3 | 3 | 1 | 6  | 6  | 10 | 2  | 3 | 1.748394712 | 0% (0.061)   |

|                   |              |        |        |                                                                                                                                                                                                                                                                                                                            |         |       |     |     |     |    |    |    |    |    |    |    |    |                 |                        |
|-------------------|--------------|--------|--------|----------------------------------------------------------------------------------------------------------------------------------------------------------------------------------------------------------------------------------------------------------------------------------------------------------------------------|---------|-------|-----|-----|-----|----|----|----|----|----|----|----|----|-----------------|------------------------|
|                   |              |        |        | enoyl-CoA isomerase)<br>(D3,D2-enoyl-CoA isomerase)<br>(Diazepam-binding inhibitor-<br>related protein 1) (DBI-related<br>protein 1) (Dodecenoyl-CoA<br>isomerase) (Hepatocellular<br>carcinoma-associated antigen<br>88) (Peroxisomal 3,2-trans-<br>enoyl-CoA isomerase) (pEC1)<br>(Renal carcinoma antigen NY-<br>REN-1) |         |       |     |     |     |    |    |    |    |    |    |    |    |                 |                        |
| A8K418_HUMAN (+1) | B3KME2_HUMAN |        | B3KME2 | cDNA FLJ10772 fis, clone<br>NT2RP4000243, highly<br>similar to Cartilage-associated<br>protein                                                                                                                                                                                                                             | 47 kDa  | 0.22  | 16  | 6   | 10  | 0  | 2  | 3  | 0  | 2  | 3  | 2  | 4  | 1.7374374<br>51 | 0%<br>(0.16)           |
| A8K897_HUMAN (+1) | RT07_HUMAN   | MRPS7  | Q9Y2R9 | 28S ribosomal protein S7,<br>mitochondrial (MRP-S7)<br>(S7m) (bMRP-27a)<br>(bMRP27a)                                                                                                                                                                                                                                       | 28 kDa  | 0.18  | 16  | 6   | 10  | 4  | 2  | 0  | 0  | 1  | 0  | 2  | 7  | 1.7374374<br>51 | 0%<br>(0.16)           |
| TAGL2_HUMAN       | C9JL85_HUMAN | MTPN   | C9JL85 | Myotrophin                                                                                                                                                                                                                                                                                                                 | 6 kDa   | 0.4   | 17  | 6   | 10  | 0  | 3  | 2  | 1  | 4  | 2  | 1  | 3  | 1.7374374<br>51 | 0%<br>(0.16)           |
| Q6ZS74_HUMAN      | RBM14_HUMAN  | RBM14  | Q96PK6 | RNA-binding protein 14<br>(Paraspeckle protein 2) (PSP2)<br>(RNA-binding motif protein<br>14) (RRM-containing<br>coactivator/modulator)<br>(Synaptotagmin-interacting<br>protein) (SYT-interacting<br>protein)                                                                                                             | 69 kDa  | 0.24  | 16  | 6   | 10  | 2  | 0  | 1  | 3  | 4  | 2  | 2  | 2  | 1.7374374<br>51 | 0%<br>(0.16)           |
| A8KA83_HUMAN (+1) | G3P_HUMAN    | GAPDH  | P04406 | Glyceraldehyde-3-phosphate<br>dehydrogenase (GAPDH) (EC<br>1.2.1.12) (Peptidyl-cysteine S-<br>nitrosylase GAPDH) (EC<br>2.6.99.-)                                                                                                                                                                                          | 36 kDa  | 0.18  | 293 | 115 | 178 | 23 | 22 | 28 | 43 | 27 | 84 | 41 | 27 | 1.7282363<br>58 | 95% (<<br>0.00010<br>) |
| SYDC_HUMAN        | B4DU42_HUMAN |        | B4DU42 | cDNA FLJ56153, highly<br>similar to Homo sapiens<br>transforming growth factor<br>beta regulator 4 (TBRG4),<br>transcript variant 1, mRNA                                                                                                                                                                                  | 72 kDa  | 0.3   | 21  | 8   | 13  | 0  | 2  | 4  | 1  | 5  | 1  | 2  | 6  | 1.7249455<br>01 | 0%<br>(0.13)           |
| B3KM97_HUMAN (+1) | H0YKD8_HUMAN | RPL28  | H0YKD8 | 60S ribosomal protein L28                                                                                                                                                                                                                                                                                                  | 19 kDa  | 0.25  | 24  | 8   | 13  | 1  | 1  | 1  | 4  | 5  | 6  | 2  | 2  | 1.7249455<br>01 | 0%<br>(0.13)           |
| M0R0F0_HUMAN (+3) | VPS45_HUMAN  | VPS45  | Q9NRW7 | Vacuolar protein sorting-<br>associated protein 45 (h-<br>VPS45) (hVps45)                                                                                                                                                                                                                                                  | 65 kDa  | 0.32  | 26  | 10  | 16  | 3  | 4  | 3  | 0  | 5  | 3  | 5  | 3  | 1.7169055<br>64 | 0%<br>(0.10)           |
| AT1B3_HUMAN       | CRNL1_HUMAN  | CRNKL1 | Q9BZJ0 | Crooked neck-like protein 1<br>(Crooked neck homolog)<br>(hCrn)                                                                                                                                                                                                                                                            | 100 kDa | 0.18  | 25  | 10  | 16  | 2  | 3  | 3  | 2  | 10 | 0  | 4  | 1  | 1.7169055<br>64 | 0%<br>(0.10)           |
| MGN2_HUMAN        | B7Z6F7_HUMAN |        | B7Z6F7 | cDNA FLJ61705, highly<br>similar to Sympleskin                                                                                                                                                                                                                                                                             | 141 kDa | 0.48  | 26  | 10  | 16  | 1  | 5  | 2  | 2  | 5  | 5  | 5  | 1  | 1.7169055<br>64 | 0%<br>(0.10)           |
| THIK_HUMAN        | B4DRT2_HUMAN | MRPS27 | B4DRT2 | 28S ribosomal protein S27,<br>mitochondrial (cDNA<br>FLJ54536, highly similar to<br>Mitochondrial 28S ribosomal<br>protein S27)                                                                                                                                                                                            | 49 kDa  | 0.23  | 26  | 10  | 16  | 3  | 3  | 3  | 1  | 7  | 1  | 2  | 6  | 1.7169055<br>64 | 0%<br>(0.10)           |
| Q59GA1_HUMAN (+2) | A6NJA2_HUMAN | USP14  | A6NJA2 | Ubiquitin carboxyl-terminal<br>hydrolase (EC 3.4.19.12)                                                                                                                                                                                                                                                                    | 51 kDa  | 0.17  | 30  | 12  | 19  | 2  | 2  | 5  | 2  | 7  | 4  | 7  | 1  | 1.7113016<br>36 | 0%<br>(0.080)          |
| A8K4H1_HUMAN (+3) | A8K690_HUMAN |        | A8K690 | cDNA FLJ76863, highly<br>similar to Homo sapiens<br>stress-induced-phosphoprotein<br>1 (Hsp70/Hsp90-organizing<br>protein) (STIP1), mRNA                                                                                                                                                                                   | 63 kDa  | 0.12  | 31  | 12  | 19  | 0  | 4  | 4  | 4  | 4  | 5  | 6  | 3  | 1.7113016<br>36 | 0%<br>(0.080)          |
| B01T1_HUMAN (+3)  | CATZ_HUMAN   | CTSZ   | Q9UBR2 | Cathepsin Z (EC 3.4.18.1)<br>(Cathepsin P) (Cathepsin X)                                                                                                                                                                                                                                                                   | 34 kDa  | 0.13  | 31  | 12  | 19  | 1  | 7  | 2  | 2  | 3  | 2  | 7  | 7  | 1.7113016<br>36 | 0%<br>(0.080)          |
| Q6IAX9_HUMAN (+1) | B5BUB1_HUMAN | RUVBL1 | B5BUB1 | RuvB-like 1 (Fragment)                                                                                                                                                                                                                                                                                                     | 50 kDa  | 0.19  | 152 | 60  | 92  | 7  | 16 | 19 | 19 | 39 | 26 | 16 | 11 | 1.7054877<br>96 | 95%<br>(0.0005<br>9)   |
| ATD3A_HUMAN       | B4DZQ5_HUMAN |        | B4DZQ5 | cDNA FLJ51417, highly<br>similar to Serine/threonine-<br>protein kinase PRP4 homolog<br>(EC 2.7.11.1)                                                                                                                                                                                                                      | 115 kDa | 0.18  | 46  | 18  | 28  | 5  | 3  | 6  | 4  | 6  | 1  | 14 | 7  | 1.7015131<br>54 | 95%<br>(0.042)         |
| B3KY63_HUMAN      | B7Z747_HUMAN |        | B7Z747 | cDNA FLJ51120, highly<br>similar to Matrix<br>metalloproteinase-9 (EC<br>3.4.24.35)                                                                                                                                                                                                                                        | 66 kDa  | 0.087 | 51  | 20  | 31  | 0  | 10 | 9  | 0  | 0  | 0  | 7  | 22 | 1.6994897<br>36 | 95%<br>(0.034)         |
| ADAS_HUMAN (+1)   | SYRC_HUMAN   | RARS   | P54136 | Arginine-tRNA ligase,<br>cytoplasmic (EC 6.1.1.19)<br>(Arginyl-tRNA synthetase)<br>(ArgRS)                                                                                                                                                                                                                                 | 75 kDa  | 0.24  | 80  | 32  | 49  | 5  | 9  | 7  | 11 | 17 | 15 | 14 | 3  | 1.6925352<br>07 | 95%<br>(0.010)         |



|                   |              |         |        |                                                                                                                                                                                                                                                  |         |       |     |     |     |    |    |    |    |    |     |    |    |             |                |
|-------------------|--------------|---------|--------|--------------------------------------------------------------------------------------------------------------------------------------------------------------------------------------------------------------------------------------------------|---------|-------|-----|-----|-----|----|----|----|----|----|-----|----|----|-------------|----------------|
| B4DW81_HUMAN (+1) | KPYM_HUMAN   | PKM     | P14618 | Pyruvate kinase PKM (EC 2.7.1.40) (Cytosolic thyroid hormone-binding protein) (CTHBP) (Opa-interacting protein 3) (OIP-3) (Pyruvate kinase 2/3) (Pyruvate kinase muscle isozyme) (Thyroid hormone-binding protein 1) (THBP1) (Tumor M2-PK) (p58) | 58 kDa  | 0.43  | 518 | 209 | 313 | 48 | 54 | 48 | 59 | 68 | 108 | 92 | 43 | 1.676474595 | 95% (<0.00010) |
| Q59G75_HUMAN (+1) | B2R8A2_HUMAN |         | B2R8A2 | cDNA, FLJ93804, highly similar to Homo sapiens gp25L2 protein (HSGP25L2G), mRNA                                                                                                                                                                  | 25 kDa  | 0.14  | 43  | 17  | 26  | 5  | 4  | 3  | 5  | 6  | 7   | 3  | 11 | 1.672002391 | 0% (0.054)     |
| B4E0H8_HUMAN (+1) | B3KSI3_HUMAN | BCAT2   | B3KSI3 | Branched-chain-amino-acid aminotransferase (EC 2.6.1.42)                                                                                                                                                                                         | 40 kDa  | 0.13  | 38  | 15  | 23  | 4  | 4  | 3  | 4  | 13 | 2   | 4  | 4  | 1.671029234 | 0% (0.067)     |
| B3KVN0_HUMAN (+3) | B0UX83_HUMAN | BAG6    | B0UX83 | HLA-B associated transcript 3, isoform CRA_a (Large proline-rich protein BAG6)                                                                                                                                                                   | 119 kDa | 0.14  | 28  | 11  | 17  | 1  | 4  | 3  | 3  | 5  | 3   | 7  | 2  | 1.668158372 | 0% (0.10)      |
| THIL_HUMAN        | B3KMR5_HUMAN |         | B3KMR5 | cDNA FLJ12434 fis, clone NT2RM1000037, highly similar to Homo sapiens KIAA0690 protein                                                                                                                                                           | 144 kDa | 0.39  | 24  | 9   | 14  | 1  | 2  | 2  | 4  | 4  | 5   | 4  | 3  | 1.665899865 | 0% (0.13)      |
| D3DUZ3_HUMAN (+2) | TM214_HUMAN  | TMEM214 | Q6NUQ4 | Transmembrane protein 214                                                                                                                                                                                                                        | 77 kDa  | 0.21  | 23  | 9   | 14  | 4  | 2  | 3  | 1  | 5  | 1   | 2  | 6  | 1.665899865 | 0% (0.13)      |
| B7Z7A8_HUMAN (+4) | B1AKV3_HUMAN | UQCC1   | B1AKV3 | Protein UQCC1 (Fragment)                                                                                                                                                                                                                         | 29 kDa  | 0.22  | 23  | 9   | 14  | 4  | 3  | 0  | 2  | 5  | 1   | 5  | 3  | 1.665899865 | 0% (0.13)      |
| RHG01_HUMAN       | K7EJE8_HUMAN | LONP1   | K7EJE8 | Lon protease homolog, mitochondrial (EC 3.4.21.-) (Lon protease-like protein) (Mitochondrial ATP-dependent protease Lon) (Serine protease 15)                                                                                                    | 93 kDa  | 0.2   | 192 | 77  | 115 | 25 | 20 | 14 | 19 | 50 | 12  | 16 | 38 | 1.664421981 | 95% (0.00024)  |
| B5MDF5_HUMAN (+1) | GSTP1_HUMAN  | GSTP1   | P09211 | Glutathione S-transferase P (EC 2.5.1.18) (GST class-pi) (GSTP1-1)                                                                                                                                                                               | 23 kDa  | 0.27  | 100 | 40  | 60  | 7  | 4  | 5  | 24 | 15 | 22  | 13 | 10 | 1.663027952 | 95% (0.0064)   |
| A8K492_HUMAN (+1) | ZN326_HUMAN  | ZNF326  | Q5BKZ1 | DBIRD complex subunit ZNF326 (Zinc finger protein 326) (Zinc finger protein interacting with mRNPs and DBC1)                                                                                                                                     | 66 kDa  | 0.17  | 18  | 7   | 11  | 2  | 2  | 1  | 2  | 2  | 2   | 4  | 3  | 1.662560548 | 0% (0.17)      |
| G3V0I5_HUMAN (+1) | Q53G69_HUMAN |         | Q53G69 | Translocase of inner mitochondrial membrane 44 homolog (Fragment)                                                                                                                                                                                | 51 kDa  | 0.18  | 79  | 32  | 48  | 10 | 7  | 4  | 11 | 25 | 9   | 5  | 8  | 1.658829036 | 95% (0.014)    |
| A7E2D8_HUMAN      | LGUL_HUMAN   | GLO1    | Q04760 | Lactoylglutathione lyase (EC 4.4.1.5) (Aldoketomutase) (Glyoxalase I) (Glx I) (Ketone-aldehyde mutase) (Methylglyoxalase) (S-D-lactoylglutathione methylglyoxal lyase)                                                                           | 21 kDa  | 0.14  | 14  | 5   | 8   | 0  | 0  | 0  | 5  | 3  | 4   | 2  | 0  | 1.657102843 | 0% (0.22)      |
| PTBP1_HUMAN       | SEL1L3_HUMAN | SEL1L3  | Q68CR1 | Protein sel-1 homolog 3 (Suppressor of lin-12-like protein 3) (Sel-1L3)                                                                                                                                                                          | 129 kDa | 0.12  | 13  | 5   | 8   | 5  | 0  | 0  | 0  | 1  | 0   | 1  | 6  | 1.657102843 | 0% (0.22)      |
| B3KWV6_HUMAN (+1) | B3KYA7_HUMAN | STK3    | B3KYA7 | Serine/threonine-protein kinase 3 (cDNA FLJ16404 fis, clone UTERU2008019, highly similar to Serine/threonine-protein kinase 3 (EC 2.7.11.1))                                                                                                     | 59 kDa  | 0.18  | 13  | 5   | 8   | 1  | 0  | 2  | 2  | 3  | 2   | 2  | 1  | 1.657102843 | 0% (0.22)      |
| AL1B1_HUMAN       | UK114_HUMAN  | HRSP12  | P52758 | Ribonuclease UK114 (EC 3.1.-) (14.5 kDa translational inhibitor protein) (p14.5) (Heat-responsive protein 12) (UK114 antigen homolog)                                                                                                            | 14 kDa  | 0.24  | 13  | 5   | 8   | 0  | 2  | 2  | 1  | 3  | 2   | 2  | 1  | 1.657102843 | 0% (0.22)      |
| CATA_HUMAN        | SPHM_HUMAN   | SGSH    | P51688 | N-sulphoglucosamine sulphonylhydrolase (EC 3.10.1.1) (Sulfo-glucosamine sulfamidase) (Sulphamidase)                                                                                                                                              | 57 kDa  | 0.29  | 13  | 5   | 8   | 2  | 0  | 1  | 3  | 1  | 0   | 2  | 5  | 1.657102843 | 0% (0.22)      |
| A8K3A8_HUMAN      | NCOA5_HUMAN  | NCOA5   | Q9HCD5 | Nuclear receptor coactivator 5 (NCoA-5) (Coactivator independent of AF-2) (CIA)                                                                                                                                                                  | 66 kDa  | 0.24  | 13  | 5   | 8   | 4  | 0  | 0  | 1  | 2  | 0   | 3  | 3  | 1.657102843 | 0% (0.22)      |
| FIT0J2_HUMAN      | RM41_HUMAN   | MRPL41  | Q8IXM3 | 39S ribosomal protein L41, mitochondrial (L41mt) (MRP-L41) (39S ribosomal protein L27 homolog) (Bcl-2-interacting mitochondrial ribosomal protein L41) (Cell proliferation-inducing gene 3 protein) (MRP-L27 homolog)                            | 15 kDa  | 0.056 | 13  | 5   | 8   | 1  | 2  | 1  | 1  | 2  | 2   | 1  | 3  | 1.657102843 | 0% (0.22)      |

|                   |              |          |        |                                                                                                                                                                                 |         |       |    |    |    |    |    |    |    |    |    |    |    |             |              |
|-------------------|--------------|----------|--------|---------------------------------------------------------------------------------------------------------------------------------------------------------------------------------|---------|-------|----|----|----|----|----|----|----|----|----|----|----|-------------|--------------|
| SAMH1_HUMAN       | ARSA_HUMAN   | ARSA     | P15289 | Arylsulfatase A (ASA) (EC 3.1.6.8) (Cerebroside-sulfatase) [Cleaved into: Arylsulfatase A component B; Arylsulfatase A component C]                                             | 54 kDa  | 0.31  | 13 | 5  | 8  | 4  | 1  | 1  | 0  | 1  | 1  | 4  | 2  | 1.657102843 | 0% (0.22)    |
| B5BUB5_HUMAN (+1) | BGH3_HUMAN   | TGFB1    | Q15582 | Transforming growth factor-beta-induced protein ig-h3 (Beta ig-h3) (Kerato-epithelin) (RGD-containing collagen-associated protein) (RGD-CAP)                                    | 75 kDa  | 0.23  | 13 | 5  | 8  | 0  | 1  | 1  | 3  | 0  | 3  | 1  | 4  | 1.657102843 | 0% (0.22)    |
| FAM3C_HUMAN       | B5BU32_HUMAN | TK1      | B5BU32 | Thymidine kinase (EC 2.7.1.21)                                                                                                                                                  | 25 kDa  | 0.35  | 13 | 5  | 8  | 0  | 4  | 1  | 0  | 1  | 4  | 1  | 2  | 1.657102843 | 0% (0.22)    |
| HNRH3_HUMAN (+1)  | DSRAD_HUMAN  | ADAR     | P55265 | Double-stranded RNA-specific adenosine deaminase (DRADA) (EC 3.5.4.37) (136 kDa double-stranded RNA-binding protein) (p136) (Interferon-inducible protein 4) (IFI-4) (K88DSRBP) | 136 kDa | 0.15  | 69 | 28 | 42 | 4  | 4  | 5  | 14 | 10 | 5  | 18 | 9  | 1.655892372 | 95% (0.020)  |
| F8VXC8_HUMAN (+2) | B7Z507_HUMAN |          | B7Z507 | cDNA FLJ51036, highly similar to Matrix metalloproteinase-9 (EC3.4.24.35)                                                                                                       | 72 kDa  | 0.14  | 55 | 22 | 33 | 3  | 11 | 9  | 0  | 0  | 2  | 8  | 23 | 1.649630651 | 95% (0.037)  |
| B3KU62_HUMAN (+2) | MGST1_HUMAN  | MGST1    | P10620 | Microsomal glutathione S-transferase 1 (Microsomal GST-1) (EC 2.5.1.18) (Microsomal GST-1)                                                                                      | 18 kDa  | 0.22  | 97 | 39 | 58 | 14 | 9  | 10 | 6  | 15 | 19 | 10 | 14 | 1.648667042 | 95% (0.0080) |
| ARF4_HUMAN        | Q86UA3_HUMAN | C12orf10 | Q86UA3 | Chromosome 12 open reading frame 10 (Chromosome 12 open reading frame 10, isoform CRA_b)                                                                                        | 43 kDa  | 0.42  | 8  | 3  | 5  | 1  | 2  | 0  | 0  | 2  | 2  | 1  | 0  | 1.646536078 | 0% (0.30)    |
| A8K9W7_HUMAN (+3) | J3KN32_HUMAN | RCOR1    | J3KN32 | REST corepressor 1 (REST corepressor 1, isoform CRA_a)                                                                                                                          | 53 kDa  | 0.19  | 8  | 3  | 5  | 0  | 1  | 2  | 0  | 2  | 0  | 2  | 1  | 1.646536078 | 0% (0.30)    |
| PSMD6_HUMAN       | RMND1_HUMAN  | RMND1    | Q9NWS8 | Required for meiotic nuclear division protein 1 homolog                                                                                                                         | 52 kDa  | 0.51  | 8  | 3  | 5  | 1  | 1  | 0  | 1  | 3  | 0  | 0  | 2  | 1.646536078 | 0% (0.30)    |
| SMC1A_HUMAN       | GSTM2_HUMAN  | GSTM2    | P28161 | Glutathione S-transferase Mu 2 (EC 2.5.1.18) (GST class-mu 2) (GSTM2-2)                                                                                                         | 26 kDa  | 0.14  | 8  | 3  | 5  | 0  | 0  | 0  | 3  | 1  | 5  | 0  | 0  | 1.646536078 | 0% (0.30)    |
| ANM1_HUMAN (+2)   | B2R6A3_HUMAN |          | B2R6A3 | cDNA, FLJ92860, highly similar to Homo sapiens solute carrier family 9 (sodium/hydrogen exchanger), member 3 regulator 1 (SLC9A3R1), mRNA                                       | 39 kDa  | 0.33  | 8  | 3  | 5  | 0  | 1  | 1  | 1  | 1  | 0  | 0  | 4  | 1.646536078 | 0% (0.30)    |
| HIBCH_HUMAN       | CLPX_HUMAN   | CLPX     | O76031 | ATP-dependent Clp protease ATP-binding subunit clpX-like, mitochondrial                                                                                                         | 69 kDa  | 0.21  | 8  | 3  | 5  | 1  | 0  | 1  | 1  | 3  | 0  | 2  | 0  | 1.646536078 | 0% (0.30)    |
| PTN1_HUMAN        | B2R514_HUMAN |          | B2R514 | cDNA, FLJ92300, Homo sapiens COP9 subunit 6 (MOV34 homolog, 34 kD) (COPS6), mRNA                                                                                                | 34 kDa  | 0.28  | 8  | 3  | 5  | 0  | 0  | 0  | 3  | 1  | 4  | 0  | 0  | 1.646536078 | 0% (0.30)    |
| MPRI_HUMAN (+1)   | A8K9D2_HUMAN | MRPL18   | A8K9D2 | Mitochondrial ribosomal protein L18, isoform CRA_b (cDNA FLJ76688, highly similar to Homo sapiens HSPC071 mRNA)                                                                 | 20 kDa  | 0.077 | 8  | 3  | 5  | 1  | 1  | 1  | 1  | 1  | 1  | 1  | 2  | 1.646536078 | 0% (0.30)    |
| ODB2_HUMAN        | B2R7N6_HUMAN |          | B2R7N6 | cDNA, FLJ93528, highly similar to Homo sapiens solute carrier family 1 (glutamate/neutral amino acid transporter), member 4 (SLC1A4), mRNA                                      | 56 kDa  | 0.17  | 8  | 3  | 5  | 0  | 1  | 2  | 0  | 0  | 1  | 3  | 1  | 1.646536078 | 0% (0.30)    |
| H0YHS6_HUMAN (+1) | B4DPS5_HUMAN | BPNT1    | B4DPS5 | 3'(2'),5'-bisphosphate nucleotidase 1 (cDNA FLJ52203, highly similar to 3'(2'),5'-bisphosphate nucleotidase 1 (EC 3.1.3.7))                                                     | 28 kDa  | 0.33  | 8  | 3  | 5  | 0  | 1  | 0  | 2  | 0  | 3  | 2  | 0  | 1.646536078 | 0% (0.30)    |
| B0UXB6_HUMAN      | DYL2_HUMAN   | DYNLL2   | Q96FJ2 | Dynein light chain 2, cytoplasmic (8 kDa dynein light chain b) (DLC8b) (Dynein light chain LC8-type 2)                                                                          | 10 kDa  | 0.24  | 8  | 3  | 5  | 0  | 0  | 2  | 1  | 1  | 2  | 1  | 0  | 1.646536078 | 0% (0.30)    |
| RS10_HUMAN        | PDS5B_HUMAN  | PDS5B    | Q9NTI5 | Sister chromatid cohesion protein PDS5 homolog B (Androgen-induced proliferation inhibitor) (Androgen-induced prostate                                                          | 165 kDa | 0.27  | 44 | 18 | 27 | 2  | 8  | 4  | 4  | 14 | 0  | 11 | 2  | 1.643318116 | 0% (0.056)   |

|                   |              |              |        |                                                                                                                                                                                                                                                                                                                                                                                             |         |      |     |     |     |    |    |    |    |    |     |    |    |                 |                        |  |
|-------------------|--------------|--------------|--------|---------------------------------------------------------------------------------------------------------------------------------------------------------------------------------------------------------------------------------------------------------------------------------------------------------------------------------------------------------------------------------------------|---------|------|-----|-----|-----|----|----|----|----|----|-----|----|----|-----------------|------------------------|--|
|                   |              |              |        | proliferative shutoff-associated protein AS3)                                                                                                                                                                                                                                                                                                                                               |         |      |     |     |     |    |    |    |    |    |     |    |    |                 |                        |  |
| LOX5_HUMAN        | EST1_HUMAN   | CES1         | P23141 | Liver carboxylesterase 1 (Acyl-coenzyme A:cholesterol acyltransferase) (ACAT) (Brain carboxylesterase hBr1) (Carboxylesterase 1) (CE-1) (hCE-1) (EC 3.1.1.1) (Cocaine carboxylesterase) (Egasy) (HMSE) (Methylumbelliferyl-acetate deacetylase 1) (EC 3.1.1.56) (Monocyte/macrophage serine esterase) (Refinyl ester hydrolase) (REH) (Serine esterase 1) (Triacylglycerol hydrolase) (TGH) | 63 kDa  | 0.26 | 45  | 18  | 27  | 0  | 10 | 8  | 0  | 0  | 3   | 4  | 21 | 1.6433181<br>16 | 0%<br>(0.056)          |  |
| SOAT1_HUMAN       | TCPB_HUMAN   | CCT2         | P78371 | T-complex protein 1 subunit beta (TCP-1-beta) (CCT-beta)                                                                                                                                                                                                                                                                                                                                    | 57 kDa  | 0.12 | 116 | 46  | 68  | 1  | 12 | 19 | 14 | 23 | 26  | 14 | 4  | 1.6415416<br>24 | 95%<br>(0.0047<br>)    |  |
| PRS7_HUMAN        | HS90B_HUMAN  | HSP90AB1     | P08238 | Heat shock protein HSP 90-beta (HSP 90) (Heat shock 84 kDa) (HSP 84) (HSP84)                                                                                                                                                                                                                                                                                                                | 83 kDa  | 0.35 | 512 | 208 | 305 | 30 | 61 | 56 | 62 | 72 | 106 | 78 | 49 | 1.6414351<br>15 | 95% (<<br>0.00010<br>) |  |
| ACSS3_HUMAN       | A4FTY4_HUMAN | TXNRD2       | A4FTY4 | TXNRD2 protein                                                                                                                                                                                                                                                                                                                                                                              | 36 kDa  | 0.17 | 35  | 14  | 21  | 0  | 5  | 4  | 0  | 10 | 4   | 0  | 4  | 1.6337248<br>85 | 0%<br>(0.086)          |  |
| B4DF70_HUMAN (+1) | GFPT1_HUMAN  | GFPT1        | Q06210 | Glutamine-fructose-6-phosphate aminotransferase [isomerizing] 1 (EC 2.6.1.16) (D-fructose-6-phosphate amidotransferase 1) (Glutamine-fructose-6-phosphate amidotransferase 1) (GFAT 1) (GFAT1) (Hexosephosphate aminotransferase 1)                                                                                                                                                         | 79 kDa  | 0.26 | 56  | 23  | 34  | 4  | 4  | 9  | 6  | 6  | 20  | 8  | 0  | 1.6277853<br>9  | 95%<br>(0.038)         |  |
| 2AAA_HUMAN (+2)   | Q53HU0_HUMAN |              | Q53HU0 | Chaperonin containing TCP1, subunit 8 (Theta) variant (Fragment)                                                                                                                                                                                                                                                                                                                            | 60 kDa  | 0.27 | 101 | 41  | 60  | 0  | 18 | 15 | 8  | 22 | 15  | 14 | 9  | 1.6236454<br>72 | 95%<br>(0.0085<br>)    |  |
| RCC1_HUMAN        | SYWC_HUMAN   | WARS         | P23381 | Tryptophan-tRNA ligase, cytoplasmic (EC 6.1.1.2) (Interferon-induced protein 53) (IFP53) (Tryptophanyl-tRNA synthetase) (TrpRS) (hWRS) [Cleaved into: T1-TrpRS; T2-TrpRS]                                                                                                                                                                                                                   | 53 kDa  | 0.28 | 52  | 21  | 31  | 1  | 6  | 3  | 11 | 2  | 20  | 6  | 4  | 1.6230873<br>16 | 95%<br>(0.047)         |  |
| B4DTA2_HUMAN      | ATD3A_HUMAN  | ATAD3A       | Q9NV17 | ATPase family AAA domain-containing protein 3A                                                                                                                                                                                                                                                                                                                                              | 71 kDa  | 0.26 | 70  | 28  | 41  | 10 | 4  | 6  | 8  | 13 | 6   | 8  | 14 | 1.6175825<br>61 | 95%<br>(0.027)         |  |
| MGST3_HUMAN (+2)  | DKC1_HUMAN   | DKC1         | O60832 | H/ACA ribonucleoprotein complex subunit 4 (EC 5.4.99.-) (CBF5 homolog) (Dyskerin) (Nopp140-associated protein of 57 kDa) (Nucleolar protein NAP57) (Nucleolar protein family A member 4) (snoRNP protein DKC1)                                                                                                                                                                              | 58 kDa  | 0.24 | 25  | 10  | 15  | 3  | 2  | 4  | 2  | 5  | 2   | 4  | 4  | 1.6173515<br>37 | 0%<br>(0.14)           |  |
| ELAV1_HUMAN       | B4E1Z4_HUMAN | CFB          | B4E1Z4 | Complement factor B (Uncharacterized protein) (cDNA FL155673, highly similar to Complement factor B (EC 3.4.21.47))                                                                                                                                                                                                                                                                         | 141 kDa | 0.28 | 24  | 10  | 15  | 1  | 3  | 5  | 1  | 3  | 4   | 2  | 6  | 1.6173515<br>37 | 0%<br>(0.14)           |  |
| PGH1_HUMAN (+2)   | IF2M_HUMAN   | MTIF2        | P46199 | Translation initiation factor IF-2, mitochondrial (IF-2(Mt)) (IF-2Mt) (IF2mt)                                                                                                                                                                                                                                                                                                               | 81 kDa  | 0.22 | 25  | 10  | 15  | 2  | 0  | 3  | 5  | 10 | 0   | 4  | 1  | 1.6173515<br>37 | 0%<br>(0.14)           |  |
| SERA_HUMAN        | ARP10_HUMAN  | ACTR10       | Q9NZ32 | Actin-related protein 10 (Actin-related protein 11) (hARP11)                                                                                                                                                                                                                                                                                                                                | 46 kDa  | 0.18 | 3   | 1   | 2   | 0  | 1  | 0  | 0  | 0  | 1   | 0  | 1  | 1.6172360<br>9  | 0%<br>(0.46)           |  |
| B5BTZ6_HUMAN (+2) | H0Y2S9_HUMAN | MPRIP        | H0Y2S9 | Myosin phosphatase Rho-interacting protein (Fragment)                                                                                                                                                                                                                                                                                                                                       | 203 kDa | 0.26 | 3   | 1   | 2   | 1  | 0  | 0  | 0  | 0  | 0   | 1  | 1  | 1.6172360<br>9  | 0%<br>(0.46)           |  |
| H0YK72_HUMAN (+4) | NIPBL_HUMAN  | NIPBL        | Q6KC79 | Nipped-B-like protein (Delangin) (SCC2 homolog)                                                                                                                                                                                                                                                                                                                                             | 316 kDa | 0.24 | 3   | 1   | 2   | 0  | 0  | 0  | 1  | 2  | 0   | 0  | 0  | 1.6172360<br>9  | 0%<br>(0.46)           |  |
| DDX21_HUMAN       | RRP1B_HUMAN  | RRP1B        | Q14684 | Ribosomal RNA processing protein 1 homolog B (RRP1-like protein B)                                                                                                                                                                                                                                                                                                                          | 84 kDa  | 0.2  | 3   | 1   | 2   | 0  | 1  | 0  | 0  | 0  | 0   | 2  | 0  | 1.6172360<br>9  | 0%<br>(0.46)           |  |
| RS11_HUMAN        | Q6AHZ7_HUMAN | DKFZp686A111 | Q6AHZ7 | Putative uncharacterized protein DKFZp686A111                                                                                                                                                                                                                                                                                                                                               | 239 kDa | 0.36 | 3   | 1   | 2   | 0  | 1  | 0  | 0  | 0  | 0   | 1  | 1  | 1.6172360<br>9  | 0%<br>(0.46)           |  |
| B1AVU8_HUMAN (+4) | ABCA1_HUMAN  | ABCA1        | O95477 | ATP-binding cassette subfamily A member 1 (ATP-binding cassette transporter 1)                                                                                                                                                                                                                                                                                                              | 254 kDa | 0.18 | 3   | 1   | 2   | 0  | 1  | 0  | 0  | 0  | 0   | 1  | 1  | 1.6172360<br>9  | 0%<br>(0.46)           |  |

|                    |              |           |        |                                                                                                                                                                                                                                                                                                     |         |      |   |   |   |   |   |   |   |   |   |   |   |            |           |
|--------------------|--------------|-----------|--------|-----------------------------------------------------------------------------------------------------------------------------------------------------------------------------------------------------------------------------------------------------------------------------------------------------|---------|------|---|---|---|---|---|---|---|---|---|---|---|------------|-----------|
|                    |              |           |        | (ABC-1) (ATP-binding cassette 1) (Cholesterol efflux regulatory protein)                                                                                                                                                                                                                            |         |      |   |   |   |   |   |   |   |   |   |   |   |            |           |
| Q86VX4_HUMAN (+1)  | CHERP_HUMAN  | CHERP     | Q8IWX8 | Calcium homeostasis endoplasmic reticulum protein (ERPROT 213-21) (SR-related CTD-associated factor 6)                                                                                                                                                                                              | 104 kDa | 0.19 | 3 | 1 | 2 | 0 | 0 | 1 | 0 | 1 | 0 | 0 | 1 | 1.61723609 | 0% (0.46) |
| ATP5H_HUMAN        | LONP2_HUMAN  | LONP2     | Q86WA8 | Lon protease homolog 2, peroxisomal (EC 3.4.21.-) (Lon protease-like protein 2) (Lon protease 2) (Peroxisomal Lon protease)                                                                                                                                                                         | 95 kDa  | 0.4  | 3 | 1 | 2 | 1 | 0 | 0 | 0 | 0 | 1 | 1 | 0 | 1.61723609 | 0% (0.46) |
| DHSB_HUMAN         | GLRX3_HUMAN  | GLRX3     | O76003 | Glutaredoxin-3 (PKC-interacting cousin of thioredoxin) (PICOT) (PKC-theta-interacting protein) (PKCq-interacting protein) (Thioredoxin-like protein 2)                                                                                                                                              | 37 kDa  | 0.3  | 3 | 1 | 2 | 0 | 1 | 0 | 0 | 0 | 2 | 0 | 0 | 1.61723609 | 0% (0.46) |
| IPO7_HUMAN         | A0AV58_HUMAN | STRN3     | A0AV58 | Striatin, calmodulin binding protein 3 (cDNA FLJ77970, highly similar to Homo sapiens nuclear autoantigen GS2NA mRNA)                                                                                                                                                                               | 78 kDa  | 0.13 | 3 | 1 | 2 | 0 | 0 | 1 | 0 | 2 | 0 | 0 | 0 | 1.61723609 | 0% (0.46) |
| SYNE2_HUMAN        | GBRL2_HUMAN  | GABARAPL2 | P60520 | Gamma-aminobutyric acid receptor-associated protein-like 2 (GABA(A) receptor-associated protein-like 2) (Ganglioside expression factor 2) (GEF-2) (General protein transport factor p16) (Golgi-associated ATPase enhancer of 16 kDa) (GATE-16) (MAP1 light chain 3-related protein)                | 14 kDa  | 0.04 | 3 | 1 | 2 | 0 | 1 | 0 | 0 | 1 | 0 | 1 | 0 | 1.61723609 | 0% (0.46) |
| B3KM81_HUMAN (+2)  | APOBR_HUMAN  | APOBR     | Q0VD83 | Apolipoprotein B receptor (Apolipoprotein B-100 receptor) (Apolipoprotein B-48 receptor) (Apolipoprotein B48 receptor) (apoB-48R)                                                                                                                                                                   | 115 kDa | 0.14 | 3 | 1 | 2 | 0 | 0 | 1 | 0 | 0 | 0 | 0 | 2 | 1.61723609 | 0% (0.46) |
| Q5NKH8_HUMAN       | MSPD2_HUMAN  | MOSPD2    | Q8NHP6 | Motile sperm domain-containing protein 2                                                                                                                                                                                                                                                            | 60 kDa  | 0.25 | 3 | 1 | 2 | 0 | 0 | 1 | 0 | 0 | 0 | 2 | 0 | 1.61723609 | 0% (0.46) |
| H3BT171_HUMAN (+1) | QS0X2_HUMAN  | QS0X2     | Q6ZRP7 | Sulfhydryl oxidase 2 (EC 1.8.3.2) (Neuroblastoma-derived sulfhydryl oxidase) (Quiescin Q6-like protein 1)                                                                                                                                                                                           | 78 kDa  | 0.2  | 3 | 1 | 2 | 0 | 0 | 0 | 1 | 1 | 0 | 0 | 1 | 1.61723609 | 0% (0.46) |
| B3KXC3_HUMAN (+2)  | B4DGF8_HUMAN | B4DGF8    | B4DGF8 | cDNA FLJ57877, highly similar to Cleavage and polyadenylation specificity factor 7                                                                                                                                                                                                                  | 51 kDa  | 0.44 | 3 | 1 | 2 | 0 | 0 | 0 | 1 | 0 | 1 | 1 | 0 | 1.61723609 | 0% (0.46) |
| PRDX4_HUMAN        | WDR12_HUMAN  | WDR12     | Q9GZL7 | Ribosome biogenesis protein WDR12 (WD repeat-containing protein 12)                                                                                                                                                                                                                                 | 48 kDa  | 0.23 | 3 | 1 | 2 | 0 | 1 | 0 | 0 | 2 | 0 | 0 | 0 | 1.61723609 | 0% (0.46) |
| PSMD1_HUMAN        | G9JXB8_HUMAN | G9JXB8    | G9JXB8 | RON variant E2E3                                                                                                                                                                                                                                                                                    | 141 kDa | 0.17 | 3 | 1 | 2 | 0 | 0 | 1 | 0 | 0 | 0 | 2 | 0 | 1.61723609 | 0% (0.46) |
| B0YIW6_HUMAN (+2)  | GMPPB_HUMAN  | GMPPB     | Q9Y5P6 | Mannose-1-phosphate guanylyltransferase beta (EC 2.7.7.13) (GDP-mannose pyrophosphorylase B) (GTP-mannose-1-phosphate guanylyltransferase beta)                                                                                                                                                     | 40 kDa  | 0.14 | 3 | 1 | 2 | 0 | 0 | 0 | 1 | 0 | 2 | 0 | 0 | 1.61723609 | 0% (0.46) |
| Q6FHK9_HUMAN       | E9PJ81_HUMAN | UBXN1     | E9PJ81 | UBX domain-containing protein 1 (Fragment)                                                                                                                                                                                                                                                          | 33 kDa  | 0.38 | 3 | 1 | 2 | 0 | 1 | 0 | 0 | 1 | 1 | 0 | 0 | 1.61723609 | 0% (0.46) |
| Q6GMX0_HUMAN       | NO66_HUMAN   | NO66      | Q9H6W3 | Bifunctional lysine-specific demethylase and histidyl-hydroxylase NO66 (EC 1.14.11.-) (EC 1.14.11.27) (60S ribosomal protein L8 histidine hydroxylase) (Histone lysine demethylase NO66) (Myc-associated protein with MjJC domain) (Nucleolar protein 66) (hsNO66) (Ribosomal oxygenase NO66) (ROX) | 71 kDa  | 0.28 | 3 | 1 | 2 | 0 | 0 | 1 | 0 | 0 | 2 | 0 | 0 | 1.61723609 | 0% (0.46) |
| B7ZLH8_HUMAN (+2)  | B4DFL3_HUMAN |           | B4DFL3 | cDNA FLJ56661, highly similar to Proteasome subunit beta type 4 (EC 3.4.25.1)                                                                                                                                                                                                                       | 18 kDa  | 0.16 | 3 | 1 | 2 | 0 | 0 | 0 | 1 | 0 | 0 | 1 | 1 | 1.61723609 | 0% (0.46) |
| B4DYX8_HUMAN (+1)  | A8MY43_HUMAN | BCKDK     | A8MY43 | Branched chain ketoacid dehydrogenase kinase, isoform CRA_c ([3-methyl-2-                                                                                                                                                                                                                           | 41 kDa  | 0.15 | 3 | 1 | 2 | 1 | 0 | 0 | 0 | 0 | 1 | 0 | 1 | 1.61723609 | 0% (0.46) |

|                   |              |           |        |                                                                                                                                                                                                                                                                                  |         |      |     |    |    |    |    |    |    |    |    |    |    |             |              |
|-------------------|--------------|-----------|--------|----------------------------------------------------------------------------------------------------------------------------------------------------------------------------------------------------------------------------------------------------------------------------------|---------|------|-----|----|----|----|----|----|----|----|----|----|----|-------------|--------------|
|                   |              |           |        | oxobutanoate dehydrogenase [lipoamide]] kinase, mitochondrial)                                                                                                                                                                                                                   |         |      |     |    |    |    |    |    |    |    |    |    |    |             |              |
| MPPA_HUMAN        | HSP7E_HUMAN  | HSPA14    | QOVDF9 | Heat shock 70 kDa protein 14 (HSP70-like protein 1) (Heat shock protein HSP60)                                                                                                                                                                                                   | 55 kDa  | 0.18 | 3   | 1  | 2  | 0  | 0  | 1  | 0  | 0  | 1  | 1  | 0  | 1.61723609  | 0% (0.46)    |
| Q53G61_HUMAN (+1) | TPPC5_HUMAN  | TRAPPC5   | Q8IURO | Trafficking protein particle complex subunit 5                                                                                                                                                                                                                                   | 21 kDa  | 0.28 | 3   | 1  | 2  | 0  | 0  | 1  | 0  | 0  | 1  | 1  | 0  | 1.61723609  | 0% (0.46)    |
| B4DZ18_HUMAN (+1) | B5BUI8_HUMAN | DUSP3     | B5BUI8 | Dual specificity phosphatase 3 (Fragment)                                                                                                                                                                                                                                        | 21 kDa  | 0.24 | 3   | 1  | 2  | 0  | 0  | 0  | 1  | 0  | 2  | 0  | 0  | 1.61723609  | 0% (0.46)    |
| H2AZ_HUMAN        | A8K3S0_HUMAN |           | A8K3S0 | cDNA FLJ76127, highly similar to Homo sapiens replication factor C (activator 1) 5, 36.5kDa (RFC5), transcript variant 1, mRNA                                                                                                                                                   | 38 kDa  | 0.31 | 3   | 1  | 2  | 0  | 0  | 1  | 0  | 2  | 0  | 0  | 0  | 1.61723609  | 0% (0.46)    |
| FXR1_HUMAN        | TRMB_HUMAN   | METTL1    | Q9UBP6 | tRNA (guanine-N(7))-methyltransferase (EC 2.1.1.33) (Methyltransferase-like protein 1) (tRNA (guanine(46)-N(7))-methyltransferase) (tRNA(m7G46)-methyltransferase)                                                                                                               | 31 kDa  | 0.12 | 3   | 1  | 2  | 0  | 0  | 0  | 1  | 2  | 0  | 0  | 0  | 1.61723609  | 0% (0.46)    |
| A8K7N0_HUMAN      | Q58F09_HUMAN | GCS1      | Q58F09 | Glucosidase I                                                                                                                                                                                                                                                                    | 92 kDa  | 0.23 | 125 | 51 | 74 | 14 | 9  | 15 | 13 | 13 | 22 | 14 | 26 | 1.613109129 | 95% (0.0043) |
| Q53HV2_HUMAN (+2) | TR150_HUMAN  | THRAP3    | Q9Y2W1 | Thyroid hormone receptor-associated protein 3 (Thyroid hormone receptor-associated protein complex 150 kDa component) (Trap150)                                                                                                                                                  | 109 kDa | 0.29 | 20  | 8  | 12 | 1  | 2  | 2  | 3  | 6  | 0  | 3  | 3  | 1.603873619 | 0% (0.18)    |
| IF2B3_HUMAN       | TBL3_HUMAN   | TBL3      | Q12788 | Transducin beta-like protein 3 (WD repeat-containing protein SAZD)                                                                                                                                                                                                               | 89 kDa  | 0.25 | 20  | 8  | 12 | 1  | 2  | 2  | 3  | 6  | 2  | 4  | 0  | 1.603873619 | 0% (0.18)    |
| RAB10_HUMAN       | B3KR12_HUMAN | NDUFS7    | B3KR12 | NADH dehydrogenase [ubiquinone] iron-sulfur protein 7, mitochondrial (cDNA FLJ34304 fis, clone FEBRA2007880, highly similar to NADH-ubiquinone oxidoreductase 20 kDa subunit, mitochondrial (EC 1.6.5.3))                                                                        | 22 kDa  | 0.5  | 20  | 8  | 12 | 4  | 2  | 1  | 1  | 4  | 2  | 2  | 4  | 1.603873619 | 0% (0.18)    |
| B7ZM99_HUMAN (+1) | AAKG1_HUMAN  | PRKAG1    | P54619 | 5'-AMP-activated protein kinase subunit gamma-1 (AMPK gamma 1) (AMPK subunit gamma-1) (AMPK)                                                                                                                                                                                     | 38 kDa  | 0.15 | 20  | 8  | 12 | 1  | 3  | 2  | 2  | 3  | 7  | 2  | 0  | 1.603873619 | 0% (0.18)    |
| 1433E_HUMAN       | PSMD6_HUMAN  | PSMD6     | Q15008 | 26S proteasome non-ATPase regulatory subunit 6 (26S proteasome regulatory subunit RPN7) (26S proteasome regulatory subunit S10) (Breast cancer-associated protein SGA-113M) (Phosphonofornate immun-associated protein 4) (Proteasome regulatory particle subunit p44S10) (p42A) | 46 kDa  | 0.53 | 54  | 22 | 32 | 1  | 6  | 5  | 11 | 3  | 19 | 6  | 4  | 1.601443206 | 95% (0.049)  |
| IPYR_HUMAN        | PYC_HUMAN    | PC        | P11498 | Pyruvate carboxylase, mitochondrial (EC 6.4.1.1) (Pyruvic carboxylase) (PCB)                                                                                                                                                                                                     | 130 kDa | 0.38 | 116 | 48 | 69 | 19 | 15 | 14 | 0  | 28 | 10 | 9  | 22 | 1.597603912 | 95% (0.0064) |
| SYDM_HUMAN        | B4E0U6_HUMAN |           | B4E0U6 | cDNA FLJ53687, highly similar to Hsc70-interacting protein                                                                                                                                                                                                                       | 40 kDa  | 0.13 | 15  | 6  | 9  | 0  | 2  | 3  | 1  | 5  | 1  | 3  | 0  | 1.582975793 | 0% (0.23)    |
| G6PE_HUMAN (+1)   | A8K521_HUMAN |           | A8K521 | cDNA FLJ78580, highly similar to Homo sapiens MCM5 minichromosome maintenance deficient 5, cell division cycle 46 (MCM5), mRNA                                                                                                                                                   | 82 kDa  | 0.19 | 15  | 6  | 9  | 0  | 3  | 2  | 1  | 5  | 1  | 3  | 0  | 1.582975793 | 0% (0.23)    |
| Q9BWC7_HUMAN      | E9PH70_HUMAN | KIDINS220 | E9PH70 | Kinase D-interacting substrate of 220 kDa (Fragment)                                                                                                                                                                                                                             | 145 kDa | 0.4  | 15  | 6  | 9  | 2  | 2  | 1  | 1  | 2  | 0  | 3  | 4  | 1.582975793 | 0% (0.23)    |
| B4E3A8_HUMAN (+1) | TM9S4_HUMAN  | TM9SF4    | Q92544 | Transmembrane 9 superfamily member 4                                                                                                                                                                                                                                             | 75 kDa  | 0.28 | 15  | 6  | 9  | 2  | 1  | 3  | 0  | 2  | 3  | 1  | 3  | 1.582975793 | 0% (0.23)    |
| TOP2A_HUMAN       | FABP5_HUMAN  | FABP5     | Q01469 | Fatty acid-binding protein, epidermal (Epidermal-type fatty acid-binding protein) (E-FABP) (Fatty acid-binding                                                                                                                                                                   | 15 kDa  | 0.14 | 18  | 6  | 9  | 1  | 3  | 0  | 2  | 2  | 4  | 1  | 2  | 1.582975793 | 0% (0.23)    |

|                   |              |         |        |                                                                                                                                                                                                                                       |         |       |     |     |     |    |    |    |    |     |    |    |    |             |                 |  |
|-------------------|--------------|---------|--------|---------------------------------------------------------------------------------------------------------------------------------------------------------------------------------------------------------------------------------------|---------|-------|-----|-----|-----|----|----|----|----|-----|----|----|----|-------------|-----------------|--|
|                   |              |         |        | protein 5) (Psoriasis-associated fatty acid-binding protein homolog) (PA-FABP)                                                                                                                                                        |         |       |     |     |     |    |    |    |    |     |    |    |    |             |                 |  |
| CCD47_HUMAN       | B2R9T9_HUMAN |         | B2R9T9 | cDNA, FLJ94551                                                                                                                                                                                                                        | 26 kDa  | 0.17  | 15  | 6   | 9   | 2  | 1  | 1  | 2  | 1   | 4  | 2  | 2  | 1.582975793 | 0% (0.23)       |  |
| E7EW20_HUMAN (+1) | S10AE_HUMAN  | S100A14 | Q9HCY8 | Protein S100-A14 (S100 calcium-binding protein A14) (S114)                                                                                                                                                                            | 12 kDa  | 0.18  | 15  | 6   | 9   | 3  | 2  | 1  | 0  | 3   | 0  | 2  | 4  | 1.582975793 | 0% (0.23)       |  |
| M1V485_HUMAN      | C9J2G3_HUMAN | OXSM    | C9J2G3 | 3-oxoacyl-[acyl-carrier-protein] synthase, mitochondrial (Fragment)                                                                                                                                                                   | 24 kDa  | 0.076 | 15  | 6   | 9   | 1  | 1  | 1  | 3  | 8   | 1  | 0  | 0  | 1.582975793 | 0% (0.23)       |  |
| PLXB2_HUMAN       | SERA_HUMAN   | PHGDH   | O43175 | D-3-phosphoglycerate dehydrogenase (3-PGDH) (EC 1.1.1.95)                                                                                                                                                                             | 57 kDa  | 0.11  | 67  | 28  | 40  | 2  | 8  | 8  | 10 | 12  | 14 | 10 | 4  | 1.579273853 | 95% (0.034)     |  |
| DSG2_HUMAN        | B3KMV8_HUMAN |         | B3KMV8 | cDNA FLJ12766 fis, clone NT2RP2001520, highly similar to Calcium-binding mitochondrial carrier protein Aralar1                                                                                                                        | 75 kDa  | 0.072 | 147 | 60  | 85  | 22 | 9  | 8  | 22 | 25  | 15 | 22 | 25 | 1.577302871 | 95% (0.0034)    |  |
| B2R769_HUMAN (+1) | PBIP1_HUMAN  | PBXIP1  | Q96AQ6 | Pre-B-cell leukemia transcription factor-interacting protein 1 (Hematopoietic PBX-interacting protein)                                                                                                                                | 81 kDa  | 0.19  | 40  | 16  | 23  | 4  | 5  | 6  | 2  | 5   | 1  | 5  | 12 | 1.574137745 | 0% (0.092)      |  |
| RBP2_HUMAN        | B4DDU6_HUMAN |         | B4DDU6 | cDNA FLJ50442, highly similar to T-complex protein 1 subunit epsilon                                                                                                                                                                  | 55 kDa  | 0.056 | 51  | 21  | 30  | 0  | 8  | 8  | 5  | 7   | 14 | 8  | 2  | 1.572736394 | 0% (0.062)      |  |
| HEM6_HUMAN        | ABHDB_HUMAN  | ABHD11  | Q8NFV4 | Alpha/beta hydrolase domain-containing protein 11 (Abhydrolase domain-containing protein 11) (EC 3.-.-.-) (Williams-Beuren syndrome chromosomal region 21 protein)                                                                    | 35 kDa  | 0.24  | 99  | 41  | 58  | 10 | 6  | 7  | 18 | 20  | 18 | 6  | 14 | 1.570583254 | 95% (0.014)     |  |
| Q96CP5_HUMAN      | UBA1_HUMAN   | UBA1    | P22314 | Ubiquitin-like modifier-activating enzyme 1 (Protein A1S9) (Ubiquitin-activating enzyme E1)                                                                                                                                           | 118 kDa | 0.18  | 178 | 74  | 104 | 10 | 11 | 24 | 29 | 23  | 36 | 28 | 19 | 1.566817293 | 95% (0.0015)    |  |
| Q53GX7_HUMAN (+1) | Q5TB53_HUMAN | TM9SF3  | Q5TB53 | Transmembrane 9 superfamily member 3 (Fragment)                                                                                                                                                                                       | 30 kDa  | 0.25  | 35  | 14  | 20  | 6  | 3  | 3  | 3  | 4   | 7  | 5  | 4  | 1.560276597 | 0% (0.11)       |  |
| E9PC28_HUMAN (+1) | ARGI2_HUMAN  | ARG2    | P78540 | Arginase-2, mitochondrial (EC 3.5.3.1) (Kidney-type arginase) (Non-hepatic arginase) (Type II arginase)                                                                                                                               | 39 kDa  | 0.13  | 21  | 9   | 13  | 7  | 0  | 2  | 0  | 7   | 5  | 0  | 1  | 1.556638134 | 0% (0.18)       |  |
| CNPY2_HUMAN       | D3DTC2_HUMAN | AYTL2   | D3DTC2 | Acyltransferase like 2, isoform CRA_a                                                                                                                                                                                                 | 54 kDa  | 0.52  | 22  | 9   | 13  | 7  | 2  | 0  | 0  | 2   | 1  | 5  | 5  | 1.556638134 | 0% (0.18)       |  |
| MRP1_HUMAN        | A8K5A4_HUMAN |         | A8K5A4 | cDNA FLJ76826, highly similar to Homo sapiens ceruloplasmin (ferroxidase) (CP), mRNA                                                                                                                                                  | 122 kDa | 0.11  | 53  | 22  | 31  | 3  | 8  | 7  | 5  | 12  | 2  | 12 | 4  | 1.553257147 | 0% (0.063)      |  |
| TNPO1_HUMAN       | FUMH_HUMAN   | FH      | P07954 | Fumarate hydratase, mitochondrial (Fumarase) (EC 4.2.1.2)                                                                                                                                                                             | 55 kDa  | 0.18  | 84  | 35  | 49  | 9  | 12 | 8  | 6  | 21  | 8  | 7  | 13 | 1.552403466 | 95% (0.025)     |  |
| AL9A1_HUMAN (+1)  | TXD12_HUMAN  | TXNDC12 | Q95881 | Thioredoxin domain-containing protein 12 (EC 1.8.4.2) (Endoplasmic reticulum resident protein 18) (ER protein 18) (ERp18) (Endoplasmic reticulum resident protein 19) (ER protein 19) (ERp19) (Thioredoxin-like protein p19) (bTLP19) | 19 kDa  | 0.21  | 40  | 17  | 24  | 4  | 5  | 5  | 3  | 6   | 5  | 4  | 9  | 1.549242032 | 0% (0.094)      |  |
| B4DJ38_HUMAN (+1) | J9JIE6_HUMAN | TMCO1   | J9JIE6 | Transmembrane and coiled-coil domain-containing protein 1 (Transmembrane and coiled-coil domains 1, isoform CRA_b)                                                                                                                    | 27 kDa  | 0.063 | 41  | 17  | 24  | 3  | 4  | 2  | 8  | 3   | 10 | 5  | 6  | 1.549242032 | 0% (0.094)      |  |
| B4DDU6_HUMAN (+1) | B7Z4V2_HUMAN |         | B7Z4V2 | cDNA FLJ51907, highly similar to Stress-70 protein, mitochondrial                                                                                                                                                                     | 72 kDa  | 0.28  | 659 | 277 | 383 | 74 | 88 | 73 | 44 | 160 | 51 | 80 | 94 | 1.549156471 | 95% (< 0.00010) |  |
| B7Z507_HUMAN      | B7Z6B8_HUMAN | DECR1   | B7Z6B8 | 2,4-dienoyl-CoA reductase, mitochondrial (cDNA FLJ50204, highly similar to 2,4-dienoyl-CoA reductase, mitochondrial (EC 1.3.1.34))                                                                                                    | 35 kDa  | 0.2   | 92  | 38  | 53  | 9  | 8  | 9  | 12 | 16  | 16 | 10 | 12 | 1.547907091 | 95% (0.021)     |  |
| B4E1U9_HUMAN      | QPCTL_HUMAN  | QPCTL   | Q9NXS2 | Glutaminyl-peptide cyclotransferase-like protein (EC 2.3.2.5) (Golgi-resident glutaminyl-peptide                                                                                                                                      | 43 kDa  | 0.22  | 10  | 4   | 6   | 0  | 1  | 1  | 2  | 0   | 4  | 1  | 1  | 1.546178161 | 0% (0.31)       |  |

|                   |              |         |        |                                                                                                                                                                                                                                                              |         |      |     |     |     |    |    |    |    |    |    |    |    |             |                 |
|-------------------|--------------|---------|--------|--------------------------------------------------------------------------------------------------------------------------------------------------------------------------------------------------------------------------------------------------------------|---------|------|-----|-----|-----|----|----|----|----|----|----|----|----|-------------|-----------------|
|                   |              |         |        | cyclotransferase) (isoQC)<br>(gQC)                                                                                                                                                                                                                           |         |      |     |     |     |    |    |    |    |    |    |    |    |             |                 |
| Q53H34_HUMAN (+2) | KPCA_HUMAN   | PRKCA   | P17252 | Protein kinase C alpha type (PKC-A) (PKC-alpha) (EC 2.7.11.13)                                                                                                                                                                                               | 77 kDa  | 0.19 | 10  | 4   | 6   | 0  | 2  | 1  | 1  | 0  | 1  | 1  | 4  | 1.546178161 | 0% (0.31)       |
| SYAC_HUMAN        | ADAI17_HUMAN | ADAM17  | P78536 | Disintegrin and metalloproteinase domain-containing protein 17 (ADAM 17) (EC 3.4.24.86) (Snake venom-like protease) (TNF-alpha convertase) (TNF-alpha-converting enzyme) (CD antigen CD156b)                                                                 | 93 kDa  | 0.19 | 10  | 4   | 6   | 2  | 0  | 2  | 0  | 4  | 0  | 1  | 1  | 1.546178161 | 0% (0.31)       |
| B2R8J0_HUMAN (+1) | PCP_HUMAN    | PRCP    | P42785 | Lysosomal Pro-X carboxypeptidase (EC 3.4.16.2) (Angiotensinase C) (Lysosomal carboxypeptidase C) (Proline carboxypeptidase) (Prolylcarboxypeptidase) (PRCP)                                                                                                  | 56 kDa  | 0.15 | 10  | 4   | 6   | 0  | 1  | 3  | 0  | 0  | 0  | 5  | 1  | 1.546178161 | 0% (0.31)       |
| GRHPR_HUMAN (+1)  | MGST2_HUMAN  | MGST2   | Q99735 | Microsomal glutathione S-transferase 2 (Microsomal GST-2) (EC 2.5.1.18) (Microsomal GST-II)                                                                                                                                                                  | 17 kDa  | 0.27 | 10  | 4   | 6   | 1  | 1  | 0  | 2  | 2  | 2  | 1  | 1  | 1.546178161 | 0% (0.31)       |
| TEX10_HUMAN       | ARL2_HUMAN   | ARL2    | P36404 | ADP-ribosylation factor-like protein 2                                                                                                                                                                                                                       | 21 kDa  | 0.14 | 10  | 4   | 6   | 0  | 0  | 1  | 3  | 2  | 3  | 1  | 0  | 1.546178161 | 0% (0.31)       |
| AP2M1_HUMAN (+1)  | B7WP27_HUMAN | CWC22   | B7WP27 | Pre-mRNA-splicing factor CWC22 homolog                                                                                                                                                                                                                       | 106 kDa | 0.25 | 10  | 4   | 6   | 1  | 1  | 1  | 1  | 2  | 0  | 2  | 2  | 1.546178161 | 0% (0.31)       |
| LEMD2_HUMAN       | GCP60_HUMAN  | ACBD3   | Q9H3P7 | Golgi resident protein GCP60 (Acyl-CoA-binding domain-containing protein 3) (Golgi complex-associated protein 1) (GOCAP1) (Golgi phosphoprotein 1) (GOLPH1) (PBR- and PKA-associated protein 7) (Peripheral benzodiazepine receptor-associated protein PAP7) | 61 kDa  | 0.21 | 9   | 4   | 6   | 1  | 0  | 0  | 3  | 3  | 3  | 0  | 0  | 1.546178161 | 0% (0.31)       |
| Q6N097_HUMAN      | UBP10_HUMAN  | USP10   | Q14694 | Ubiquitin carboxyl-terminal hydrolase 10 (EC 3.4.19.12) (Deubiquitinating enzyme 10) (Ubiquitin thioesterase 10) (Ubiquitin-specific-processing protease 10)                                                                                                 | 87 kDa  | 0.19 | 10  | 4   | 6   | 0  | 2  | 2  | 0  | 2  | 0  | 4  | 0  | 1.546178161 | 0% (0.31)       |
| B2R761_HUMAN (+1) | HTRA2_HUMAN  | HTRA2   | O43464 | Serine protease HTRA2, mitochondrial (EC 3.4.21.108) (High temperature requirement protein A2) (HtrA2) (Omi stress-regulated endoprotease) (Serine protease 25) (Serine proteinase OMI)                                                                      | 49 kDa  | 0.22 | 10  | 4   | 6   | 1  | 1  | 1  | 1  | 1  | 1  | 3  | 1  | 1.546178161 | 0% (0.31)       |
| ACSF2_HUMAN (+2)  | SELT_HUMAN   | SELT    | P62341 | Selenoprotein T (SelT)                                                                                                                                                                                                                                       | 22 kDa  | 0.19 | 10  | 4   | 6   | 1  | 1  | 1  | 1  | 1  | 2  | 1  | 2  | 1.546178161 | 0% (0.31)       |
| APOE_HUMAN        | SHLB1_HUMAN  | SH3GLB1 | Q9Y371 | Endophilin-B1 (Bax-interacting factor 1) (Bif-1) (SH3 domain-containing GRB2-like protein B1)                                                                                                                                                                | 41 kDa  | 0.35 | 10  | 4   | 6   | 0  | 1  | 1  | 2  | 0  | 4  | 2  | 0  | 1.546178161 | 0% (0.31)       |
| B4DPK2_HUMAN (+2) | B4E2X9_HUMAN | B4E2X9  | B4E2X9 | cDNA FLJ58081, highly similar to Cleft lip and palate transmembrane protein 1                                                                                                                                                                                | 75 kDa  | 0.24 | 30  | 12  | 17  | 6  | 3  | 1  | 2  | 1  | 5  | 6  | 6  | 1.542239809 | 0% (0.14)       |
| H0Y368_HUMAN      | I1SRC5_HUMAN | I1SRC5  | I1SRC5 | UBE2L3/KRAS fusion protein                                                                                                                                                                                                                                   | 34 kDa  | 0.28 | 29  | 12  | 17  | 1  | 1  | 3  | 7  | 2  | 7  | 6  | 3  | 1.542239809 | 0% (0.14)       |
| Q658S9_HUMAN (+3) | DRG1_HUMAN   | DRG1    | Q9Y295 | Developmentally-regulated GTP-binding protein 1 (DRG-1) (Neural precursor cell expressed developmentally down-regulated protein 5) (NEDD-3)                                                                                                                  | 41 kDa  | 0.18 | 29  | 12  | 17  | 0  | 1  | 4  | 7  | 4  | 8  | 5  | 0  | 1.542239809 | 0% (0.14)       |
| OCAD1_HUMAN       | B2RCM2_HUMAN | B2RCM2  | B2RCM2 | cDNA, FL196156, highly similar to Homo sapiens leucyl-tRNA synthetase (LARS), mRNA                                                                                                                                                                           | 134 kDa | 0.3  | 48  | 20  | 28  | 2  | 6  | 7  | 5  | 16 | 5  | 6  | 1  | 1.541331124 | 0% (0.078)      |
| B4DGU4_HUMAN (+4) | DYHC1_HUMAN  | DYNC1H1 | Q14204 | Cytoplasmic dynein 1 heavy chain 1 (Cytoplasmic dynein heavy chain 1) (Dynein heavy chain, cytosolic)                                                                                                                                                        | 532 kDa | 0.24 | 347 | 146 | 201 | 49 | 32 | 40 | 27 | 40 | 96 | 45 | 26 | 1.539362758 | 95% (< 0.00010) |
| P4HA2_HUMAN (+2)  | TCPA_HUMAN   | TCPI1   | P17987 | T-complex protein 1 subunit alpha (TCP-1-alpha) (CCT-alpha)                                                                                                                                                                                                  | 60 kDa  | 0.16 | 75  | 31  | 43  | 3  | 11 | 10 | 8  | 15 | 15 | 9  | 5  | 1.536543733 | 95% (0.037)     |

|                   |              |           |        |                                                                                                                                                                                                                                                                                                                       |         |       |    |    |    |   |    |    |    |    |    |    |    |             |             |
|-------------------|--------------|-----------|--------|-----------------------------------------------------------------------------------------------------------------------------------------------------------------------------------------------------------------------------------------------------------------------------------------------------------------------|---------|-------|----|----|----|---|----|----|----|----|----|----|----|-------------|-------------|
| Q53EW8_HUMAN (+1) | GALT2_HUMAN  | GALNT2    | Q10471 | Polypeptide N-acetylgalactosaminyltransferase 2 (EC 2.4.1.41) (Polypeptide GalNAc transferase 2) (GalNAc-T2) (pp-GaNTase 2) (Protein-UDP acetylgalactosaminyltransferase 2) (UDP-GalNAc:polypeptide N-acetylgalactosaminyltransferase 2) [Cleaved into: Polypeptide N-acetylgalactosaminyltransferase 2 soluble form] | 65 kDa  | 0.24  | 36 | 15 | 21 | 4 | 6  | 2  | 4  | 4  | 7  | 4  | 6  | 1.53168267  | 0% (0.12)   |
| B2R7U4_HUMAN (+1) | J3KNU8_HUMAN | ALDH6A1   | J3KNU8 | Methylmalonate-semialdehyde dehydrogenase [acylating], mitochondrial                                                                                                                                                                                                                                                  | 56 kDa  | 0.36  | 42 | 18 | 25 | 6 | 5  | 4  | 3  | 12 | 3  | 6  | 4  | 1.526933065 | 0% (0.097)  |
| M0QWZ7_HUMAN (+1) | RPB1_HUMAN   | POLR2A    | P24928 | DNA-directed RNA polymerase II subunit RPB1 (RNA polymerase II subunit B1) (EC 2.7.7.6) (DNA-directed RNA polymerase II subunit A) (DNA-directed RNA polymerase III largest subunit) (RNA-directed RNA polymerase II subunit RPB1) (EC 2.7.7.48)                                                                      | 217 kDa | 0.24  | 17 | 7  | 10 | 0 | 2  | 3  | 2  | 0  | 1  | 6  | 3  | 1.526819354 | 0% (0.23)   |
| B4DZK8_HUMAN (+2) | B4DNJ6_HUMAN | STRAP     | B4DNJ6 | Serine-threonine kinase receptor-associated protein (cDNA FLJ51909, highly similar to Serine-threonine kinase receptor-associated protein)                                                                                                                                                                            | 40 kDa  | 0.33  | 17 | 7  | 10 | 1 | 5  | 1  | 0  | 2  | 5  | 3  | 0  | 1.526819354 | 0% (0.23)   |
| GNAS1_HUMAN       | E7ER89_HUMAN | PAPSS2    | E7ER89 | Sulfate adenylyltransferase                                                                                                                                                                                                                                                                                           | 70 kDa  | 0.083 | 17 | 7  | 10 | 0 | 3  | 3  | 1  | 0  | 8  | 2  | 0  | 1.526819354 | 0% (0.23)   |
| LACTB_HUMAN       | B4DEI4_HUMAN |           | B4DEI4 | cDNA FLJ54595, highly similar to Golgi reassembly-stacking protein 2                                                                                                                                                                                                                                                  | 42 kDa  | 0.2   | 17 | 7  | 10 | 2 | 1  | 1  | 3  | 2  | 2  | 3  | 3  | 1.526819354 | 0% (0.23)   |
| Q6IQ30_HUMAN      | GOGA2_HUMAN  | GOLGA2    | Q08379 | Golgin subfamily A member 2 (130 kDa cis-Golgi matrix protein) (GM130) (GM130 autoantigen) (Golgin-95)                                                                                                                                                                                                                | 113 kDa | 0.22  | 17 | 7  | 10 | 0 | 1  | 2  | 3  | 2  | 2  | 6  | 0  | 1.526819354 | 0% (0.23)   |
| E7ETK0_HUMAN (+1) | A7YA96_HUMAN | GGCX      | A7YA96 | Gamma-glutamyl carboxylase (Gamma-glutamyl carboxylase) (cDNA, FLJ93613, highly similar to Homo sapiens gamma-glutamyl carboxylase (GGCX), mRNA)                                                                                                                                                                      | 88 kDa  | 0.36  | 17 | 7  | 10 | 4 | 1  | 1  | 1  | 4  | 0  | 3  | 3  | 1.526819354 | 0% (0.23)   |
| B4DZQ5_HUMAN      | CN166_HUMAN  | C14orf166 | Q9Y224 | UPF0568 protein C14orf166 (CLE7 homolog) (CLE)                                                                                                                                                                                                                                                                        | 28 kDa  | 0.1   | 50 | 21 | 29 | 4 | 3  | 5  | 9  | 7  | 9  | 7  | 7  | 1.522386921 | 0% (0.080)  |
| B7Z809_HUMAN (+3) | B4DJQ5_HUMAN |           | B4DJQ5 | cDNA FLJ59211, highly similar to Glucosidase 2 subunit beta                                                                                                                                                                                                                                                           | 60 kDa  | 0.18  | 83 | 35 | 48 | 7 | 8  | 11 | 10 | 13 | 5  | 17 | 13 | 1.521487964 | 95% (0.032) |
| PDCD6_HUMAN       | B7Z809_HUMAN |           | B7Z809 | cDNA FLJ56016, highly similar to C-1-tetrahydrofolate synthase, cytoplasmic                                                                                                                                                                                                                                           | 110 kDa | 0.28  | 57 | 24 | 33 | 1 | 7  | 8  | 7  | 10 | 13 | 9  | 1  | 1.518927796 | 0% (0.066)  |
| PLD3_HUMAN        | B2R679_HUMAN |           | B2R679 | cDNA, FLJ92825, highly similar to Homo sapiens SAR1a gene homolog 1 (S. cerevisiae) (SARA1), mRNA                                                                                                                                                                                                                     | 22 kDa  | 0.13  | 24 | 10 | 14 | 1 | 2  | 2  | 5  | 2  | 9  | 2  | 1  | 1.517800374 | 0% (0.18)   |
| H3BN98_HUMAN      | AIMP2_HUMAN  | AIMP2     | Q13155 | Aminoacyl tRNA synthase complex-interacting multifunctional protein 2 (Multisynthase complex auxiliary component p38) (Protein JTV-1)                                                                                                                                                                                 | 35 kDa  | 0.27  | 24 | 10 | 14 | 1 | 1  | 3  | 5  | 2  | 9  | 1  | 2  | 1.517800374 | 0% (0.18)   |
| A8K6Y1_HUMAN      | BIEA_HUMAN   | BLVRA     | P53004 | Biliverdin reductase A (BVR A) (EC 1.3.1.24) (Biliverdin-IX alpha-reductase)                                                                                                                                                                                                                                          | 33 kDa  | 0.28  | 24 | 10 | 14 | 3 | 2  | 2  | 3  | 3  | 5  | 2  | 4  | 1.517800374 | 0% (0.18)   |
| ITB4_HUMAN        | A8K335_HUMAN |           | A8K335 | cDNA FLJ76254, highly similar to Homo sapiens gamma-glutamyl hydrolase (GGH), mRNA                                                                                                                                                                                                                                    | 36 kDa  | 0.15  | 31 | 13 | 18 | 1 | 5  | 4  | 3  | 3  | 2  | 9  | 4  | 1.512590806 | 0% (0.15)   |
| BDH_HUMAN         | PNPT1_HUMAN  | PNPT1     | Q8TCS8 | Polyribonucleotide nucleotidyltransferase 1, mitochondrial (EC 2.7.7.8) (3'-5' RNA exonuclease OLD35) (PNPase old-35)                                                                                                                                                                                                 | 86 kDa  | 0.23  | 92 | 39 | 53 | 7 | 11 | 11 | 11 | 22 | 11 | 8  | 12 | 1.509430369 | 95% (0.027) |



|                   |              |          |        |                                                                                                                                                                        |         |      |     |     |     |    |    |    |    |    |    |    |    |             |     |            |  |  |
|-------------------|--------------|----------|--------|------------------------------------------------------------------------------------------------------------------------------------------------------------------------|---------|------|-----|-----|-----|----|----|----|----|----|----|----|----|-------------|-----|------------|--|--|
|                   |              |          |        | (Polynucleotide phosphorylase 1) (PNPase 1) (Polynucleotide phosphorylase-like protein)                                                                                |         |      |     |     |     |    |    |    |    |    |    |    |    |             |     |            |  |  |
| B5BU61_HUMAN (+1) | RM44_HUMAN   | MRPL44   | Q9H9J2 | 39S ribosomal protein L44, mitochondrial (L44mt) (MRP-L44) (EC 3.1.26.-)                                                                                               | 38 kDa  | 0.15 | 38  | 16  | 22  | 6  | 3  | 2  | 5  | 11 | 2  | 3  | 7  | 1.509203132 | 0%  | (0.12)     |  |  |
| B4DZ88_HUMAN (+1) | B3KTT0_HUMAN |          | B3KTT0 | cDNA FLJ38675 fis, clone IMR322000243, highly similar to Nucleoporin Nup43                                                                                             | 42 kDa  | 0.13 | 38  | 16  | 22  | 0  | 3  | 5  | 8  | 7  | 5  | 6  | 4  | 1.509203132 | 0%  | (0.12)     |  |  |
| A8K032_HUMAN (+3) | A8K2U2_HUMAN |          | A8K2U2 | cDNA FLJ75392, highly similar to Homo sapiens hexokinase II (HKII) mRNA                                                                                                | 102 kDa | 0.12 | 38  | 16  | 22  | 3  | 3  | 2  | 8  | 7  | 6  | 6  | 3  | 1.509203132 | 0%  | (0.12)     |  |  |
| TM9S2_HUMAN       | Q9H9B7_HUMAN |          | Q9H9B7 | Coatomer subunit gamma                                                                                                                                                 | 89 kDa  | 0.1  | 38  | 16  | 22  | 2  | 0  | 3  | 9  | 7  | 8  | 5  | 0  | 1.509203132 | 0%  | (0.12)     |  |  |
| SYNC_HUMAN        | Q8TA92_HUMAN |          | Q8TA92 | Similar to AFG3 ATPase family gene 3-like 2 (Yeast) (Fragment)                                                                                                         | 90 kDa  | 0.18 | 105 | 45  | 61  | 21 | 8  | 10 | 7  | 20 | 10 | 15 | 16 | 1.507382142 | 95% | (0.020)    |  |  |
| Q7Z3K9_HUMAN      | ITB1_HUMAN   | ITGB1    | P05556 | Integrin beta-1 (Fibronectin receptor subunit beta) (Glycoprotein IIa) (GP1IA) (VLA-4 subunit beta) (CD antigen CD29)                                                  | 88 kDa  | 0.11 | 45  | 19  | 26  | 5  | 4  | 5  | 5  | 3  | 3  | 7  | 13 | 1.506827624 | 0%  | (0.099)    |  |  |
| C9JFR7_HUMAN (+1) | F8WCY5_HUMAN | RCN2     | F8WCY5 | Reticulocalbin-2                                                                                                                                                       | 39 kDa  | 0.4  | 44  | 19  | 26  | 4  | 4  | 3  | 8  | 4  | 6  | 7  | 9  | 1.506827624 | 0%  | (0.099)    |  |  |
| Q53HH4_HUMAN      | Q86VX4_HUMAN | SMC3     | Q86VX4 | Structural maintenance of chromosomes 3                                                                                                                                | 142 kDa | 0.19 | 52  | 22  | 30  | 6  | 7  | 7  | 2  | 13 | 1  | 13 | 3  | 1.505072476 | 0%  | (0.081)    |  |  |
| ADPGK_HUMAN       | B3KNT8_HUMAN | NAP1L1   | B3KNT8 | Nucleosome assembly protein 1-like 1 (cDNA FLJ30458 fis, clone BRACE2009421, highly similar to NUCLEOSOME ASSEMBLY PROTEIN 1-LIKE 1)                                   | 43 kDa  | 0.14 | 52  | 22  | 30  | 4  | 4  | 11 | 3  | 8  | 11 | 6  | 5  | 1.505072476 | 0%  | (0.081)    |  |  |
| GFPT1_HUMAN       | HNRH3_HUMAN  | HNRNPH3  | P31942 | Heterogeneous nuclear ribonucleoprotein H3 (hnRNP H3) (Heterogeneous nuclear ribonucleoprotein 2H9) (hnRNP 2H9)                                                        | 37 kDa  | 0.23 | 66  | 28  | 38  | 4  | 8  | 8  | 7  | 9  | 8  | 14 | 7  | 1.502659744 | 0%  | (0.056)    |  |  |
| SAC1_HUMAN        | CCD47_HUMAN  | CCDC47   | Q96A33 | Coiled-coil domain-containing protein 47                                                                                                                               | 56 kDa  | 0.24 | 67  | 28  | 38  | 8  | 6  | 5  | 9  | 7  | 9  | 9  | 13 | 1.502659744 | 0%  | (0.056)    |  |  |
| RS14_HUMAN        | B4DLN1_HUMAN | SLC25A10 | B4DLN1 | Mitochondrial dicarboxylate carrier (Uncharacterized protein) (cDNA FLJ60124, highly similar to Mitochondrial dicarboxylate carrier)                                   | 48 kDa  | 0.36 | 78  | 34  | 46  | 9  | 9  | 7  | 10 | 10 | 18 | 13 | 4  | 1.501087706 | 95% | (0.040)    |  |  |
| HSDL2_HUMAN       | CMC2_HUMAN   | SLC25A13 | Q9UJS0 | Calcium-binding mitochondrial carrier protein Aralar2 (Citrin) (Mitochondrial aspartate glutamate carrier 2) (Solute carrier family 25 member 13)                      | 74 kDa  | 0.17 | 244 | 104 | 139 | 41 | 18 | 13 | 32 | 40 | 31 | 32 | 37 | 1.492914615 | 95% | (0.00097)  |  |  |
| ACSL4_HUMAN (+2)  | ECHM_HUMAN   | ECHS1    | P30084 | Enoyl-CoA hydratase, mitochondrial (EC 4.2.1.17) (Enoyl-CoA hydratase 1) (Short-chain enoyl-CoA hydratase) (SCEH)                                                      | 31 kDa  | 0.16 | 194 | 83  | 111 | 28 | 15 | 14 | 25 | 49 | 21 | 17 | 24 | 1.492494452 | 95% | (0.0029)   |  |  |
| PSD11_HUMAN       | B2R761_HUMAN |          | B2R761 | cDNA, FLJ93299, highly similar to Homo sapiens sterol carrier protein 2 (SCP2), mRNA                                                                                   | 59 kDa  | 0.32 | 53  | 23  | 31  | 5  | 5  | 6  | 8  | 6  | 11 | 6  | 9  | 1.489186168 | 0%  | (0.083)    |  |  |
| H10_HUMAN         | FLNA_HUMAN   | FLNA     | P21333 | Filamin-A (FLN-A) (Actin-binding protein 280) (ABP-280) (Alpha-filamin) (Endothelial actin-binding protein) (Filamin-1) (Non-muscle filamin)                           | 281 kDa | 0.27 | 444 | 192 | 255 | 31 | 65 | 80 | 18 | 57 | 33 | 83 | 81 | 1.486391961 | 95% | (< 0.0010) |  |  |
| E5R199_HUMAN (+1) | B7Z6B3_HUMAN |          | B7Z6B3 | cDNA FLJ53094, highly similar to Receptor expression-enhancing protein 5                                                                                               | 18 kDa  | 0.35 | 26  | 11  | 15  | 4  | 2  | 0  | 5  | 3  | 4  | 2  | 6  | 1.485303754 | 0%  | (0.19)     |  |  |
| B7Z792_HUMAN (+1) | HNRPF_HUMAN  | HNRNPF   | P52597 | Heterogeneous nuclear ribonucleoprotein F (hnRNP F) (Nucleolin-like protein mes94-1) [Cleaved into: Heterogeneous nuclear ribonucleoprotein F, N-terminally processed] | 46 kDa  | 0.28 | 116 | 48  | 64  | 9  | 8  | 16 | 15 | 19 | 11 | 21 | 12 | 1.483788625 | 95% | (0.021)    |  |  |
| MRRP1_HUMAN       | F5H315_HUMAN | CDK5RAP3 | F5H315 | CDK5 regulatory subunit-associated protein 3                                                                                                                           | 60 kDa  | 0.21 | 19  | 8   | 11  | 3  | 3  | 1  | 1  | 2  | 1  | 5  | 3  | 1.48280522  | 0%  | (0.24)     |  |  |

|                   |              |         |        |                                                                                                                                                                                                                             |         |       |     |    |    |    |    |    |    |    |    |    |    |             |              |
|-------------------|--------------|---------|--------|-----------------------------------------------------------------------------------------------------------------------------------------------------------------------------------------------------------------------------|---------|-------|-----|----|----|----|----|----|----|----|----|----|----|-------------|--------------|
| PCBP1_HUMAN       | RT02_HUMAN   | MRPS2   | Q9Y399 | 28S ribosomal protein S2, mitochondrial (MRP-S2) (S2m)                                                                                                                                                                      | 33 kDa  | 0.23  | 18  | 8  | 11 | 2  | 2  | 1  | 3  | 2  | 3  | 2  | 4  | 1.48280522  | 0% (0.24)    |
| B7Z4B8_HUMAN      | CPSF6_HUMAN  | CPSF6   | Q16630 | Cleavage and polyadenylation specificity factor subunit 6 (Cleavage and polyadenylation specificity factor 68 kDa subunit) (CFIm68) (CPSF 68 kDa subunit) (Pre-mRNA cleavage factor Im 68 kDa subunit) (Protein HPBR11-4/7) | 59 kDa  | 0.14  | 19  | 8  | 11 | 0  | 3  | 1  | 4  | 2  | 0  | 8  | 1  | 1.48280522  | 0% (0.24)    |
| LMAN1_HUMAN (+1)  | A8K813_HUMAN |         | A8K813 | cDNA FLJ77763, highly similar to Homo sapiens prolactin regulatory element binding (PREB), mRNA                                                                                                                             | 45 kDa  | 0.11  | 19  | 8  | 11 | 6  | 0  | 1  | 1  | 1  | 3  | 2  | 5  | 1.48280522  | 0% (0.24)    |
| C1PHA2_HUMAN      | K7ELC4_HUMAN | RPL22   | K7ELC4 | 60S ribosomal protein L22 (Fragment)                                                                                                                                                                                        | 9 kDa   | 0.085 | 19  | 8  | 11 | 1  | 2  | 2  | 3  | 3  | 4  | 1  | 3  | 1.48280522  | 0% (0.24)    |
| ACTZ_HUMAN (+1)   | TI23B_HUMAN  | TIMM23B | Q5SRD1 | Putative mitochondrial import inner membrane translocase subunit Tim23B                                                                                                                                                     | 28 kDa  | 0.19  | 19  | 8  | 11 | 2  | 2  | 1  | 3  | 3  | 1  | 1  | 6  | 1.48280522  | 0% (0.24)    |
| Q9BR63_HUMAN (+1) | A8K8D9_HUMAN |         | A8K8D9 | Glucose-6-phosphate 1-dehydrogenase (EC 1.1.1.49)                                                                                                                                                                           | 59 kDa  | 0.15  | 99  | 42 | 56 | 3  | 13 | 15 | 11 | 11 | 14 | 21 | 10 | 1.48241773  | 95% (0.029)  |
| LYAG_HUMAN        | NPM_HUMAN    | NPM1    | P06748 | Nucleophosmin (NPM) (Nucleolar phosphoprotein B25) (Nucleolar protein NO35) (Numarin)                                                                                                                                       | 33 kDa  | 0.092 | 77  | 33 | 44 | 7  | 6  | 9  | 11 | 10 | 14 | 10 | 10 | 1.479498279 | 95% (0.049)  |
| SR140_HUMAN       | ADAS_HUMAN   | AGPS    | O00116 | Alkylidihydroxyacetonephosphate synthase, peroxisomal (Alkyl-DHAP synthase) (EC 2.5.1.26) (Aging-associated gene 5 protein) (Alkylglycerone-phosphate synthase)                                                             | 73 kDa  | 0.11  | 70  | 30 | 40 | 16 | 4  | 4  | 7  | 12 | 8  | 8  | 12 | 1.478162329 | 0% (0.058)   |
| PSD12_HUMAN       | SQSTM_HUMAN  | SQSTM1  | Q13501 | Sequestosome-1 (EB13-associated protein of 60 kDa) (EBIAP) (p60) (Phosphotyrosine-independent ligand for the Lck SH2 domain of 62 kDa) (Ubiquitin-binding protein p62)                                                      | 48 kDa  | 0.16  | 12  | 5  | 7  | 2  | 2  | 1  | 0  | 2  | 3  | 1  | 2  | 1.477935328 | 0% (0.31)    |
| RAB6B_HUMAN       | PTN6_HUMAN   | PTPN6   | P29350 | Tyrosine-protein phosphatase non-receptor type 6 (EC 3.1.3.48) (Hematopoietic cell protein-tyrosine phosphatase) (Protein-tyrosine phosphatase 1C) (PTP-1C) (Protein-tyrosine phosphatase SHP-1) (SH-PTP1)                  | 68 kDa  | 0.44  | 12  | 5  | 7  | 0  | 1  | 4  | 0  | 0  | 0  | 5  | 3  | 1.477935328 | 0% (0.31)    |
| Q53GX6_HUMAN      | SPT6H_HUMAN  | SUPT6H  | Q7KZ85 | Transcription elongation factor SPT6 (hSPT6) (Histone chaperone suppressor of Ty6) (Tat-cotransactivator 2 protein) (Tat-CT2 protein)                                                                                       | 199 kDa | 0.13  | 12  | 5  | 7  | 0  | 3  | 2  | 0  | 0  | 0  | 7  | 0  | 1.477935328 | 0% (0.31)    |
| ARF1_HUMAN (+1)   | IDE_HUMAN    | IDE     | P14735 | Insulin-degrading enzyme (EC 3.4.24.56) (Abeta-degrading protease) (Insulin protease) (Insulinase) (Insulysin)                                                                                                              | 118 kDa | 0.31  | 12  | 5  | 7  | 1  | 1  | 1  | 2  | 1  | 4  | 1  | 1  | 1.477935328 | 0% (0.31)    |
| ITB1_HUMAN        | Q53FV3_HUMAN |         | Q53FV3 | COP9 signalosome subunit 4 variant (Fragment)                                                                                                                                                                               | 46 kDa  | 0.14  | 11  | 5  | 7  | 0  | 1  | 2  | 2  | 3  | 2  | 2  | 0  | 1.477935328 | 0% (0.31)    |
| Q53GN4_HUMAN (+3) | ATG9A_HUMAN  | ATG9A   | Q7Z3C6 | Autophagy-related protein 9A (APG9-like 1) (mATG9)                                                                                                                                                                          | 94 kDa  | 0.1   | 12  | 5  | 7  | 1  | 2  | 1  | 1  | 1  | 4  | 1  | 1  | 1.477935328 | 0% (0.31)    |
| A6QKW0_HUMAN (+1) | J3K000_HUMAN | PEPD    | J3K000 | PEPD protein                                                                                                                                                                                                                | 55 kDa  | 0.29  | 12  | 5  | 7  | 1  | 2  | 1  | 1  | 2  | 2  | 1  | 2  | 1.477935328 | 0% (0.31)    |
| Q6NVW7_HUMAN      | THOC6_HUMAN  | THOC6   | Q86W42 | THO complex subunit 6 homolog (Functional spliceosome-associated protein 35) (ISAP35) (WD repeat-containing protein 58)                                                                                                     | 38 kDa  | 0.25  | 12  | 5  | 7  | 0  | 0  | 2  | 3  | 2  | 1  | 3  | 1  | 1.477935328 | 0% (0.31)    |
| DHX30_HUMAN (+1)  | MCTS1_HUMAN  | MCTS1   | Q9ULC4 | Malignant T-cell-amplified sequence 1 (MCT-1) (Multiple copies T-cell malignancies)                                                                                                                                         | 21 kDa  | 0.14  | 12  | 5  | 7  | 0  | 0  | 0  | 5  | 3  | 3  | 1  | 0  | 1.477935328 | 0% (0.31)    |
| GRPE1_HUMAN       | CAYP1_HUMAN  | CAPS    | Q13938 | Calcyphosin (Calcyphosine)                                                                                                                                                                                                  | 21 kDa  | 0.37  | 12  | 5  | 7  | 1  | 0  | 0  | 4  | 7  | 0  | 0  | 0  | 1.477935328 | 0% (0.31)    |
| ECT1_HUMAN        | APOE_HUMAN   | APOE    | P02649 | Apolipoprotein E (Apo-E)                                                                                                                                                                                                    | 36 kDa  | 0.18  | 57  | 24 | 32 | 5  | 3  | 3  | 13 | 0  | 16 | 6  | 11 | 1.474558318 | 0% (0.084)   |
| AAAS_HUMAN        | AIFM1_HUMAN  | AIFM1   | O95831 | Apoptosis-inducing factor 1, mitochondrial (EC 1.1.1.-) (Programmed cell death protein 8)                                                                                                                                   | 67 kDa  | 0.2   | 175 | 75 | 99 | 20 | 20 | 14 | 21 | 39 | 17 | 23 | 21 | 1.472686898 | 95% (0.0059) |

|                   |              |         |        |                                                                                                                                                                                                         |         |       |     |     |     |    |    |    |    |     |    |    |    |             |                |
|-------------------|--------------|---------|--------|---------------------------------------------------------------------------------------------------------------------------------------------------------------------------------------------------------|---------|-------|-----|-----|-----|----|----|----|----|-----|----|----|----|-------------|----------------|
| USP9X_HUMAN       | LPPRC_HUMAN  | LRPPRC  | P42704 | Leucine-rich PPR motif-containing protein, mitochondrial (130 kDa leucine-rich protein) (LRP130) (GP130)                                                                                                | 158 kDa | 0.088 | 539 | 234 | 306 | 56 | 66 | 58 | 53 | 118 | 46 | 66 | 79 | 1.464320483 | 95% (<0.00010) |
| DHRS7_HUMAN       | NIP22_HUMAN  | GBAS    | O75323 | Protein NipSnap homolog 2 (NipSnap2) (Glioblastoma-amplified sequence)                                                                                                                                  | 34 kDa  | 0.28  | 35  | 15  | 20  | 1  | 3  | 2  | 9  | 4   | 10 | 3  | 3  | 1.46424076  | 0% (0.15)      |
| B2RBL3_HUMAN (+1) | INF2_HUMAN   | INF2    | Q27J81 | Inverted formin-2 (HBEBP2-binding protein C)                                                                                                                                                            | 136 kDa | 0.34  | 34  | 15  | 20  | 3  | 4  | 6  | 2  | 2   | 3  | 15 | 0  | 1.46424076  | 0% (0.15)      |
| B2RD27_HUMAN (+1) | MYEF2_HUMAN  | MYEF2   | Q9P2K5 | Myelin expression factor 2 (MEF-2) (MyEF-2) (MST156)                                                                                                                                                    | 64 kDa  | 0.24  | 5   | 2   | 3   | 0  | 0  | 0  | 2  | 1   | 0  | 2  | 0  | 1.464127231 | 0% (0.45)      |
| ARPC3_HUMAN (+2)  | G3XAB3_HUMAN | TTC17   | G3XAB3 | Tetratricopeptide repeat domain 17, isoform CRA_c (Tetratricopeptide repeat protein 17)                                                                                                                 | 109 kDa | 0.25  | 5   | 2   | 3   | 3  | 0  | 0  | 0  | 1   | 0  | 1  | 1  | 1.464127231 | 0% (0.45)      |
| B2R6N9_HUMAN (+5) | B7Z2D6_HUMAN |         | B7Z2D6 | cDNA FLJ53863, highly similar to Cystathionine beta-synthase (EC 4.2.1.22)                                                                                                                              | 56 kDa  | 0.12  | 3   | 2   | 3   | 0  | 0  | 1  | 1  | 1   | 1  | 1  | 0  | 1.464127231 | 0% (0.45)      |
| CD82_HUMAN (+2)   | Q5S9Q5_HUMAN | ND2     | Q5S9Q5 | NADH-ubiquinone oxidoreductase chain 2 (EC 1.6.5.3)                                                                                                                                                     | 39 kDa  | 0.17  | 5   | 2   | 3   | 1  | 0  | 0  | 1  | 1   | 1  | 1  | 0  | 1.464127231 | 0% (0.45)      |
| VATL_HUMAN        | HPDL_HUMAN   | HPDL    | Q96IR7 | 4-hydroxyphenylpyruvate dioxygenase-like protein (EC 1.13.-.-) (Glyoxalase domain-containing protein 1)                                                                                                 | 39 kDa  | 0.16  | 5   | 2   | 3   | 0  | 1  | 1  | 0  | 2   | 1  | 0  | 0  | 1.464127231 | 0% (0.45)      |
| B4DP27_HUMAN (+1) | GATM_HUMAN   | GATM    | P50440 | Glycine amidinotransferase, mitochondrial (EC 2.1.4.1) (L-arginine:glycine amidinotransferase) (Transamidinase)                                                                                         | 48 kDa  | 0.3   | 5   | 2   | 3   | 0  | 2  | 0  | 0  | 2   | 1  | 0  | 0  | 1.464127231 | 0% (0.45)      |
| A8K5A4_HUMAN (+4) | A6NJZ9_HUMAN | NOC3L   | A6NJZ9 | Nucleolar complex protein 3 homolog                                                                                                                                                                     | 93 kDa  | 0.11  | 5   | 2   | 3   | 0  | 0  | 0  | 2  | 1   | 0  | 1  | 1  | 1.464127231 | 0% (0.45)      |
| SMU1_HUMAN        | NOC4L_HUMAN  | NOC4L   | Q9BVI4 | Nucleolar complex protein 4 homolog (NOC4 protein homolog) (NOC4-like protein) (Nucleolar complex-associated protein 4-like protein)                                                                    | 58 kDa  | 0.16  | 5   | 2   | 3   | 0  | 1  | 0  | 1  | 0   | 0  | 3  | 0  | 1.464127231 | 0% (0.45)      |
| NSDHL_HUMAN       | CUL2_HUMAN   | CUL2    | Q13617 | Cullin-2 (CUL-2)                                                                                                                                                                                        | 87 kDa  | 0.17  | 5   | 2   | 3   | 0  | 0  | 1  | 1  | 1   | 1  | 1  | 0  | 1.464127231 | 0% (0.45)      |
| B4E2A6_HUMAN (+1) | C9JZG9_HUMAN | UBE2H   | C9JZG9 | Ubiquitin-conjugating enzyme E2 H (Fragment)                                                                                                                                                            | 12 kDa  | 0.18  | 5   | 2   | 3   | 0  | 0  | 0  | 2  | 2   | 0  | 1  | 0  | 1.464127231 | 0% (0.45)      |
| B3KTQ2_HUMAN (+2) | DGLB_HUMAN   | DAGLB   | Q8NCG7 | Sn-1-specific diacylglycerol lipase beta (DGL-beta) (EC 3.1.1.-) (KCCRI3L)                                                                                                                              | 74 kDa  | 0.23  | 5   | 2   | 3   | 2  | 0  | 0  | 0  | 0   | 1  | 1  | 1  | 1.464127231 | 0% (0.45)      |
| H0Y4R1_HUMAN (+1) | NADE_HUMAN   | NADSYN1 | Q6IA69 | Glutamine-dependent NAD(+) synthetase (EC 6.3.5.1) (NAD(+) synthase [glutamine-hydrolyzing]) (NAD(+) synthetase)                                                                                        | 79 kDa  | 0.24  | 5   | 2   | 3   | 0  | 1  | 0  | 1  | 0   | 3  | 0  | 0  | 1.464127231 | 0% (0.45)      |
| Q5JQ44_HUMAN (+1) | A6NFN2_HUMAN | ABI1    | A6NFN2 | Abi interactor 1                                                                                                                                                                                        | 55 kDa  | 0.34  | 5   | 2   | 3   | 1  | 0  | 1  | 0  | 0   | 2  | 0  | 1  | 1.464127231 | 0% (0.45)      |
| SYG_HUMAN         | G9LJ35_HUMAN | ND5     | G9LJ35 | NADH-ubiquinone oxidoreductase chain 5 (EC 1.6.5.3)                                                                                                                                                     | 67 kDa  | 0.18  | 5   | 2   | 3   | 2  | 0  | 0  | 0  | 1   | 0  | 2  | 0  | 1.464127231 | 0% (0.45)      |
| 6PGD_HUMAN (+3)   | BYST_HUMAN   | BYSL    | Q13895 | Bystin                                                                                                                                                                                                  | 50 kDa  | 0.22  | 5   | 2   | 3   | 0  | 1  | 0  | 1  | 1   | 0  | 2  | 0  | 1.464127231 | 0% (0.45)      |
| PDS5B_HUMAN       | IKIP_HUMAN   | IKBIP   | Q70UQ0 | Inhibitor of nuclear factor kappa-B kinase-interacting protein (I kappa-B kinase-interacting protein) (IKKB-interacting protein) (IKK-interacting protein)                                              | 39 kDa  | 0.12  | 5   | 2   | 3   | 2  | 0  | 0  | 0  | 0   | 0  | 2  | 1  | 1.464127231 | 0% (0.45)      |
| RS18_HUMAN        | GHDC_HUMAN   | GHDC    | Q8N2G8 | GH3 domain-containing protein                                                                                                                                                                           | 58 kDa  | 0.41  | 5   | 2   | 3   | 2  | 0  | 0  | 0  | 0   | 0  | 0  | 3  | 1.464127231 | 0% (0.45)      |
| G3V0E8_HUMAN      | ISOC1_HUMAN  | ISOC1   | Q96CN7 | Isochorismatase domain-containing protein 1                                                                                                                                                             | 32 kDa  | 0.21  | 5   | 2   | 3   | 0  | 1  | 1  | 0  | 0   | 0  | 2  | 1  | 1.464127231 | 0% (0.45)      |
| B2RCM2_HUMAN (+5) | B3KN09_HUMAN |         | B3KN09 | cDNA FLJ13173 fis. clone NT2RP3003831, highly similar to Endonuclease G-like 1 (EC 3.1.30.-)                                                                                                            | 41 kDa  | 0.14  | 5   | 2   | 3   | 2  | 0  | 0  | 0  | 1   | 2  | 0  | 1  | 1.464127231 | 0% (0.45)      |
| LAP2A_HUMAN       | MAVS_HUMAN   | MAVS    | Q7Z434 | Mitochondrial antiviral-signaling protein (MAVS) (CARD adapter inducing interferon beta) (Cardif) (Interferon beta promoter stimulator protein 1) (IPS-1) (Putative NF-kappa-B-activating protein 031N) | 57 kDa  | 0.22  | 5   | 2   | 3   | 1  | 0  | 0  | 1  | 1   | 1  | 1  | 0  | 1.464127231 | 0% (0.45)      |

|                   |              |                |        |                                                                                                                                                                                                                                                                                 |         |      |     |    |  |    |    |    |    |    |    |    |    |    |                 |                 |              |
|-------------------|--------------|----------------|--------|---------------------------------------------------------------------------------------------------------------------------------------------------------------------------------------------------------------------------------------------------------------------------------|---------|------|-----|----|--|----|----|----|----|----|----|----|----|----|-----------------|-----------------|--------------|
|                   |              |                |        | (Virus-induced-signaling adapter) (VISA)                                                                                                                                                                                                                                        |         |      |     |    |  |    |    |    |    |    |    |    |    |    |                 |                 |              |
| A8K9T8_HUMAN (+1) | B2R960_HUMAN |                | B2R960 | cDNA, FLJ94230, highly similar to Homo sapiens thioredoxin-like 1 (TXNL1), mRNA                                                                                                                                                                                                 | 32 kDa  | 0.11 | 5   | 2  |  | 3  | 0  | 0  | 0  | 2  | 0  | 2  | 1  | 0  | 1.4641272<br>31 | 0%<br>(0.45)    |              |
| B7Z416_HUMAN (+1) | A8KAP9_HUMAN |                | A8KAP9 | cDNA FLJ78448, highly similar to Homo sapiens argininosuccinate synthetase (ASS), transcript variant 1, mRNA                                                                                                                                                                    | 47 kDa  | 0.22 | 88  | 38 |  | 50 | 5  | 8  | 7  | 18 | 13 | 23 | 13 | 1  | 1.4622453<br>93 | 95%<br>(0.042)  |              |
| C9JNW5_HUMAN      | H7BX11_HUMAN | ESYT2          | H7BX11 | Extended synaptotagmin-2 (Fragment)                                                                                                                                                                                                                                             | 98 kDa  | 0.31 | 88  | 38 |  | 50 | 20 | 6  | 5  | 7  | 9  | 16 | 13 | 14 | 1.4622453<br>93 | 95%<br>(0.042)  |              |
| NCBP1_HUMAN       | DHSB_HUMAN   | SDHB           | P21912 | Succinate dehydrogenase [ubiquinone] iron-sulfur subunit, mitochondrial (EC 1.3.5.1) (Iron-sulfur subunit of complex II) (Ip)                                                                                                                                                   | 32 kDa  | 0.14 | 51  | 22 |  | 29 | 7  | 3  | 5  | 7  | 11 | 4  | 7  | 7  | 1.4568891<br>91 | 0%<br>(0.10)    |              |
| B0V043_HUMAN (+1) | B3KX11_HUMAN |                | B3KX11 | cDNA FLJ44436 fis, clone UTERU2019706, highly similar to T-complex protein 1 subunit gamma                                                                                                                                                                                      | 58 kDa  | 0.13 | 90  | 39 |  | 51 | 4  | 14 | 8  | 13 | 17 | 16 | 12 | 6  | 1.4537413<br>12 | 95%<br>(0.043)  |              |
| NUP98_HUMAN       | ACSL4_HUMAN  | ACSL4          | O60488 | Long-chain-fatty-acid--CoA ligase 4 (EC 6.2.1.3) (Long-chain acyl-CoA synthetase 4) (LACS4)                                                                                                                                                                                     | 79 kDa  | 0.1  | 66  | 29 |  | 38 | 8  | 9  | 10 | 2  | 9  | 7  | 11 | 10 | 1.4529663<br>67 | 0%<br>(0.072)   |              |
| OSBL8_HUMAN (+1)  | CTL2_HUMAN   | SLC44A2        | Q8IWA5 | Choline transporter-like protein 2 (Solute carrier family 44 member 2)                                                                                                                                                                                                          | 80 kDa  | 0.14 | 44  | 19 |  | 25 | 14 | 1  | 1  | 3  | 12 | 1  | 6  | 7  | 1.4515103<br>1  | 0%<br>(0.13)    |              |
| S12A2_HUMAN       | A8K9T3_HUMAN |                | A8K9T3 | cDNA FLJ76467, highly similar to Homo sapiens acyl-CoA synthetase long-chain family member 1 (ACSL1), mRNA                                                                                                                                                                      | 78 kDa  | 0.14 | 83  | 36 |  | 47 | 9  | 8  | 9  | 10 | 1  | 13 | 12 | 21 | 1.4505393<br>14 | 0%<br>(0.051)   |              |
| RT29_HUMAN        | B4DLT2_HUMAN |                | B4DLT2 | cDNA FLJ56637, highly similar to Nuclear pore complex protein Nup155                                                                                                                                                                                                            | 151 kDa | 0.19 | 84  | 36 |  | 47 | 11 | 9  | 8  | 9  | 11 | 11 | 14 | 11 | 1.4505393<br>14 | 0%<br>(0.051)   |              |
| SYWC_HUMAN        | DHX15_HUMAN  | DHX15          | O43143 | Putative pre-mRNA-splicing factor ATP-dependent RNA helicase DHX15 (EC 3.6.4.13) (ATP-dependent RNA helicase #46) (DEAH box protein 15)                                                                                                                                         | 91 kDa  | 0.26 | 137 | 60 |  | 78 | 7  | 18 | 13 | 22 | 17 | 10 | 31 | 19 | 1.4491437<br>89 | 95%<br>(0.016)  |              |
| H0Y9V9_HUMAN (+1) | J3QQQ9_HUMAN | KRBA2          | J3QQQ9 | KRAB-A domain-containing protein 2                                                                                                                                                                                                                                              | 13 kDa  | 0.2  | 22  | 9  |  | 12 | 2  | 2  | 2  | 2  | 3  | 1  | 6  | 2  | 3               | 1.4473795<br>46 | 0%<br>(0.24) |
| RLA2_HUMAN        | WDR18_HUMAN  | WDR18          | Q9BV38 | WD repeat-containing protein 18                                                                                                                                                                                                                                                 | 47 kDa  | 0.56 | 21  | 9  |  | 12 | 5  | 0  | 0  | 4  | 6  | 2  | 1  | 3  | 1.4473795<br>46 | 0%<br>(0.24)    |              |
| Q6FGL0_HUMAN      | E9PK47_HUMAN | PYGL           | E9PK47 | Phosphorylase (EC 2.4.1.1)                                                                                                                                                                                                                                                      | 94 kDa  | 0.26 | 21  | 9  |  | 12 | 4  | 0  | 0  | 3  | 1  | 7  | 4  | 0  | 1.4473795<br>46 | 0%<br>(0.24)    |              |
| DEK_HUMAN         | B4DII5_HUMAN |                | B4DII5 | Importin subunit alpha                                                                                                                                                                                                                                                          | 60 kDa  | 0.18 | 21  | 9  |  | 12 | 1  | 3  | 2  | 3  | 5  | 4  | 3  | 1  | 1.4473795<br>46 | 0%<br>(0.24)    |              |
| MESD_HUMAN        | IF4G3_HUMAN  | EIF4G3         | O43432 | Eukaryotic translation initiation factor 4 gamma 3 (eIF-4-gamma 3) (eIF-4G 3) (eIF-4-gamma II) (eIF4GII)                                                                                                                                                                        | 177 kDa | 0.29 | 21  | 9  |  | 12 | 1  | 3  | 2  | 0  | 3  | 3  | 4  | 2  | 1.4473795<br>46 | 0%<br>(0.24)    |              |
| Q96DV6_HUMAN (+1) | EF1G_HUMAN   | EEF1G          | P26641 | Elongation factor 1-gamma (EF-1-gamma) (eEF-1B gamma)                                                                                                                                                                                                                           | 50 kDa  | 0.16 | 92  | 40 |  | 52 | 3  | 9  | 10 | 18 | 10 | 23 | 12 | 6  | 1.4456496<br>34 | 95%<br>(0.044)  |              |
| J3KNU8_HUMAN (+1) | PDCD6_HUMAN  | PDCD6          | O75340 | Programmed cell death protein 6 (Apoptosis-linked gene 2 protein) (Probable calcium-binding protein ALG-2)                                                                                                                                                                      | 22 kDa  | 0.23 | 37  | 16 |  | 21 | 3  | 3  | 5  | 6  | 3  | 2  | 5  | 11 | 1.4442703<br>88 | 0%<br>(0.15)    |              |
| P DPR_HUMAN       | PR40A_HUMAN  | PRPF40A        | O75400 | Pre-mRNA-processing factor 40 homolog A (Fas ligand-associated factor 1) (Formin-binding protein 11) (Formin-binding protein 3) (Huntingtin yeast partner A) (Huntingtin-interacting protein 10) (HIP-10) (Huntingtin-interacting protein A) (Renal carcinoma antigen NY-REN-6) | 109 kDa | 0.19 | 37  | 16 |  | 21 | 3  | 6  | 4  | 4  | 5  | 1  | 5  | 10 | 1.4442703<br>88 | 0%<br>(0.15)    |              |
| I7GSS2_HUMAN      | Q6MZM3_HUMAN | DKFZp686C21148 | Q6MZM3 | Putative uncharacterized protein DKFZp686C21148                                                                                                                                                                                                                                 | 141 kDa | 0.42 | 37  | 16 |  | 21 | 3  | 6  | 3  | 4  | 8  | 0  | 9  | 4  | 1.4442703<br>88 | 0%<br>(0.15)    |              |
| Q5XPV6_HUMAN      | CP1B1_HUMAN  | CYP1B1         | Q16678 | Cytochrome P450 1B1 (EC 1.14.14.1) (CYP1B1)                                                                                                                                                                                                                                     | 61 kDa  | 0.19 | 37  | 16 |  | 21 | 5  | 3  | 2  | 6  | 0  | 4  | 8  | 9  | 1.4442703<br>88 | 0%<br>(0.15)    |              |
| B5MCA4_HUMAN (+1) | SMCA1_HUMAN  | SMARCA1        | P28370 | Probable global transcription activator SNF2L1 (EC 3.6.4.-) (ATP-dependent helicase)                                                                                                                                                                                            | 123 kDa | 0.11 | 37  | 16 |  | 21 | 4  | 3  | 5  | 0  | 10 | 1  | 8  | 2  | 1.4442703<br>88 | 0%<br>(0.15)    |              |

|                    |              |         |        |                                                                                                                                                                                                                                          |         |       |     |    |     |    |    |    |    |    |    |    |    |             |     |          |
|--------------------|--------------|---------|--------|------------------------------------------------------------------------------------------------------------------------------------------------------------------------------------------------------------------------------------------|---------|-------|-----|----|-----|----|----|----|----|----|----|----|----|-------------|-----|----------|
|                    |              |         |        | SMARCA1) (Nucleosome-remodeling factor subunit SNF2L) (SWI/SNF-related matrix-associated actin-dependent regulator of chromatin subfamily A member 1)                                                                                    |         |       |     |    |     |    |    |    |    |    |    |    |    |             |     |          |
| PSIP1_HUMAN        | B3KSW0_HUMAN | CDIPT   | B3KSW0 | CDP-diacylglycerol--inositol 3-phosphatidytransferase (Phosphatidylinositol synthase), isoform CRA_b (cDNA FLJ37149 fis, clone BRACE2025437, highly similar to CDP-diacylglycerol--inositol3-phosphatidytransferase (EC 2.7.8.11))       | 20 kDa  | 0.11  | 53  | 23 | 30  | 8  | 4  | 3  | 8  | 7  | 8  | 7  | 8  | 1.442989087 | 0%  | (0.11)   |
| PGAM1_HUMAN (+1)   | A8K4W7_HUMAN |         | A8K4W7 | cDNA FLJ76284, highly similar to Homo sapiens succinate-CoA ligase, GDP-forming, alpha subunit (SUCLG1), mRNA                                                                                                                            | 35 kDa  | 0.31  | 29  | 13 | 17  | 4  | 2  | 2  | 5  | 7  | 3  | 4  | 3  | 1.433994028 | 0%  | (0.19)   |
| VATE1_HUMAN        | M0QXB4_HUMAN | COPE    | M0QXB4 | Coatmer protein complex, subunit epsilon, isoform CRA_g (Coatmer subunit epsilon)                                                                                                                                                        | 37 kDa  | 0.21  | 15  | 6  | 8   | 0  | 1  | 2  | 2  | 2  | 7  | 0  | 0  | 1.428518579 | 0%  | (0.31)   |
| A8K6I4_HUMAN (+1)  | B4DE16_HUMAN | CTNBL1  | B4DE16 | Beta-catenin-like protein 1 (cDNA FLJ53492, highly similar to Beta-catenin-like protein 1)                                                                                                                                               | 62 kDa  | 0.12  | 14  | 6  | 8   | 0  | 4  | 1  | 1  | 1  | 3  | 4  | 0  | 1.428518579 | 0%  | (0.31)   |
| A1JUB_HUMAN        | TIM14_HUMAN  | DNAJC19 | Q96DA6 | Mitochondrial import inner membrane translocase subunit TIM14 (DnaJ homolog subfamily C member 19)                                                                                                                                       | 12 kDa  | 0.22  | 14  | 6  | 8   | 1  | 1  | 1  | 2  | 2  | 2  | 2  | 2  | 1.428518579 | 0%  | (0.31)   |
| PRS8_HUMAN         | B3KM74_HUMAN |         | B3KM74 | cDNA FLJ10425 fis, clone NT2RP1000326, highly similar to Metaxin-2                                                                                                                                                                       | 30 kDa  | 0.25  | 14  | 6  | 8   | 3  | 1  | 0  | 2  | 3  | 1  | 1  | 3  | 1.428518579 | 0%  | (0.31)   |
| SPON1_HUMAN        | D6R952_HUMAN | MSMO1   | D6R952 | Methylsterol monooxygenase 1                                                                                                                                                                                                             | 28 kDa  | 0.13  | 14  | 6  | 8   | 1  | 2  | 1  | 2  | 2  | 3  | 1  | 1  | 1.428518579 | 0%  | (0.31)   |
| B3KNT8_HUMAN (+11) | A8K5M4_HUMAN |         | A8K5M4 | cDNA FLJ75088, highly similar to Homo sapiens p21 (CDKN1A)-activated kinase 2 (PAK2), mRNA                                                                                                                                               | 58 kDa  | 0.14  | 39  | 17 | 22  | 0  | 4  | 8  | 5  | 5  | 12 | 4  | 1  | 1.426488739 | 0%  | (0.16)   |
| ECHP_HUMAN         | B4DPD5_HUMAN |         | B4DPD5 | cDNA FLJ56307, highly similar to Ubiquitin thioesterase protein OTUB1 (EC 3.4.-.-)                                                                                                                                                       | 35 kDa  | 0.23  | 39  | 17 | 22  | 0  | 5  | 2  | 10 | 8  | 7  | 4  | 3  | 1.426488739 | 0%  | (0.16)   |
| Q7KZ24_HUMAN (+1)  | H3BN98_HUMAN |         | H3BN98 | Uncharacterized protein (Fragment)                                                                                                                                                                                                       | 27 kDa  | 0.2   | 48  | 21 | 27  | 4  | 6  | 4  | 7  | 8  | 12 | 4  | 4  | 1.421692323 | 0%  | (0.13)   |
| B4DKB2_HUMAN (+1)  | PSMD2_HUMAN  | PSMD2   | Q13200 | 26S proteasome non-ATPase regulatory subunit 2 (26S proteasome regulatory subunit RPN1) (26S proteasome regulatory subunit S2) (26S proteasome subunit p97) (Protein 55.11) (Tumor necrosis factor type 1 receptor-associated protein 2) | 100 kDa | 0.19  | 108 | 47 | 60  | 6  | 14 | 13 | 14 | 14 | 20 | 17 | 9  | 1.421631716 | 95% | (0.038)  |
| STML2_HUMAN        | C9J9I1_HUMAN | SEL1    | C9J9I1 | Selenoprotein I                                                                                                                                                                                                                          | 44 kDa  | 0.21  | 30  | 10 | 13  | 2  | 0  | 6  | 2  | 6  | 2  | 3  | 2  | 1.418252076 | 0%  | (0.24)   |
| B2R8A2_HUMAN (+1)  | A0SBM6_HUMAN | ND1     | A0SBM6 | NADH-ubiquinone oxidoreductase chain 1 (EC 1.6.5.3)                                                                                                                                                                                      | 36 kDa  | 0.22  | 23  | 10 | 13  | 6  | 1  | 2  | 2  | 4  | 4  | 3  | 2  | 1.418252076 | 0%  | (0.24)   |
| DNJC3_HUMAN        | CDK1_HUMAN   | CDK1    | P06493 | Cyclin-dependent kinase 1 (CDK1) (EC 2.7.11.22) (EC 2.7.11.23) (Cell division control protein 2 homolog) (Cell division protein kinase 1) (p34 protein kinase)                                                                           | 34 kDa  | 0.18  | 22  | 10 | 13  | 0  | 4  | 4  | 2  | 3  | 4  | 5  | 1  | 1.418252076 | 0%  | (0.24)   |
| SCRIB_HUMAN        | B0IIT1_HUMAN |         | B0IIT1 | MYOIF variant protein                                                                                                                                                                                                                    | 125 kDa | 0.057 | 66  | 29 | 37  | 6  | 12 | 9  | 2  | 3  | 6  | 8  | 19 | 1.415927738 | 0%  | (0.090)  |
| MUTA_HUMAN         | QCR2_HUMAN   | UQCRC2  | P22695 | Cytochrome b-c1 complex subunit 2, mitochondrial (Complex III subunit 2) (Core protein II) (Ubiquinol-cytochrome-c reductase complex core protein 2)                                                                                     | 48 kDa  | 0.23  | 194 | 86 | 109 | 32 | 16 | 19 | 19 | 32 | 16 | 27 | 34 | 1.41540321  | 95% | (0.0083) |
| DDX46_HUMAN        | B2R7P8_HUMAN |         | B2R7P8 | cDNA, FLJ93545, highly similar to Homo sapiens 5-                                                                                                                                                                                        | 65 kDa  | 0.1   | 32  | 14 | 18  | 0  | 6  | 4  | 4  | 5  | 10 | 3  | 0  | 1.413386361 | 0%  | (0.19)   |

|                   |              |        |        |                                                                                                                                                                                       |          |       |     |    |    |    |    |    |    |    |    |    |    |             |             |
|-------------------|--------------|--------|--------|---------------------------------------------------------------------------------------------------------------------------------------------------------------------------------------|----------|-------|-----|----|----|----|----|----|----|----|----|----|----|-------------|-------------|
|                   |              |        |        | aminoimidazole-4-carboxamide ribonucleotide formyltransferase/IMP cyclohydrolase (ATIC), mRNA                                                                                         |          |       |     |    |    |    |    |    |    |    |    |    |    |             |             |
| NPCI_HUMAN (+1)   | J3QRU1_HUMAN | YES1   | J3QRU1 | Tyrosine-protein kinase Yes                                                                                                                                                           | 61 kDa   | 0.07  | 31  | 14 | 18 | 3  | 4  | 5  | 2  | 7  | 4  | 0  | 4  | 1.413386361 | 0% (0.19)   |
| A8K548_HUMAN (+3) | PO210_HUMAN  | NUP210 | Q8TEM1 | Nuclear pore membrane glycoprotein 210 (Nuclear pore protein gp210) (Nuclear envelope pore membrane protein POM 210) (POM210) (Nucleoporin Nup210) (Pore membrane protein of 210 kDa) | 205 kDa  | 0.069 | 84  | 37 | 47 | 14 | 8  | 8  | 7  | 17 | 14 | 8  | 9  | 1.41259856  | 0% (0.064)  |
| DDX18_HUMAN       | RCN1_HUMAN   | RCN1   | Q15293 | Reticulocalbin-1                                                                                                                                                                      | 39 kDa   | 0.13  | 41  | 18 | 23 | 8  | 3  | 3  | 4  | 2  | 6  | 5  | 10 | 1.410554713 | 0% (0.16)   |
| TMX1_HUMAN        | PP2AA_HUMAN  | PPP2CA | P67775 | Serine/threonine-protein phosphatase 2A catalytic subunit alpha isoform (PP2A-alpha) (EC 3.1.3.16) (Replication protein C) (RP-C)                                                     | 36 kDa   | 0.13  | 41  | 18 | 23 | 1  | 5  | 2  | 10 | 6  | 6  | 9  | 2  | 1.410554713 | 0% (0.16)   |
| F5H6U7_HUMAN (+1) | A6QKW0_HUMAN | SHINC3 | A6QKW0 | SHINC3                                                                                                                                                                                | 28 kDa   | 0.27  | 50  | 22 | 28 | 6  | 4  | 5  | 8  | 3  | 5  | 8  | 12 | 1.408707293 | 0% (0.13)   |
| B4DJQ8_HUMAN      | B7Z5J7_HUMAN |        | B7Z5J7 | cDNA FLJ58682, highly similar to Vesicle-fusing ATPase (EC 3.6.4.6)                                                                                                                   | 82 kDa   | 0.13  | 151 | 67 | 84 | 16 | 12 | 24 | 15 | 18 | 15 | 25 | 27 | 1.398970221 | 95% (0.021) |
| B4E324_HUMAN (+2) | NNTM_HUMAN   | NNT    | Q13423 | NAD(P) transhydrogenase, mitochondrial (EC 1.6.1.2) (Nicotinamide nucleotide transhydrogenase) (Pyridine nucleotide transhydrogenase)                                                 | 114 kDa  | 0.1   | 97  | 43 | 54 | 17 | 8  | 9  | 9  | 12 | 13 | 17 | 12 | 1.398241392 | 0% (0.055)  |
| ARC1B_HUMAN       | B3KR55_HUMAN | HDAC2  | B3KR55 | Histone deacetylase (EC 3.5.1.98)                                                                                                                                                     | 52 kDa   | 0.22  | 52  | 23 | 29 | 0  | 7  | 5  | 6  | 0  | 0  | 11 | 7  | 1.396793335 | 0% (0.13)   |
| CISD2_HUMAN       | FAF2_HUMAN   | FAF2   | Q96CS3 | FAS-associated factor 2 (Protein ETEA) (UBX domain-containing protein 3B) (UBX domain-containing protein 8)                                                                           | 53 kDa   | 0.37  | 34  | 15 | 19 | 10 | 1  | 3  | 1  | 7  | 1  | 7  | 4  | 1.395315235 | 0% (0.20)   |
| C9JV86_HUMAN (+4) | A8K6A5_HUMAN |        | A8K6A5 | cDNA FLJ7742, highly similar to Homo sapiens integrin, alpha 5 (fibronectin receptor, alpha polypeptide), mRNA                                                                        | 114 kDa  | 0.085 | 25  | 11 | 14 | 0  | 6  | 5  | 0  | 0  | 1  | 6  | 7  | 1.393880392 | 0% (0.24)   |
| BZW1_HUMAN (+1)   | 4F2_HUMAN    | SLC3A2 | P08195 | 4F2 cell-surface antigen heavy chain (4F2hc) (4F2 heavy chain antigen) (Lymphocyte activation antigen 4F2 large subunit) (Solute carrier family 3 member 2) (CD antigen CD98)         | 68 kDa   | 0.14  | 117 | 52 | 65 | 9  | 18 | 19 | 6  | 14 | 12 | 19 | 20 | 1.393310617 | 95% (0.040) |
| B9EGQ8_HUMAN (+2) | MUC16_HUMAN  | MUC16  | Q8WX17 | Mucin-16 (MUC-16) (Ovarian cancer-related tumor marker CA125) (CA-125) (Ovarian carcinoma antigen CA125)                                                                              | 2353 kDa | 0.062 | 16  | 7  | 9  | 6  | 1  | 0  | 0  | 7  | 0  | 1  | 1  | 1.391082065 | 0% (0.31)   |
| FLII_HUMAN        | APOL2_HUMAN  | APOL2  | Q9BQE5 | Apolipoprotein L2 (Apolipoprotein L-II) (ApoL-II)                                                                                                                                     | 37 kDa   | 0.084 | 17  | 7  | 9  | 5  | 0  | 0  | 2  | 3  | 1  | 1  | 4  | 1.391082065 | 0% (0.31)   |
| B0QY89_HUMAN      | E9PFA8_HUMAN | ERGIC3 | E9PFA8 | Endoplasmic reticulum-Golgi intermediate compartment protein 3                                                                                                                        | 45 kDa   | 0.22  | 16  | 7  | 9  | 2  | 2  | 2  | 1  | 3  | 3  | 2  | 1  | 1.391082065 | 0% (0.31)   |
| B4DGM9_HUMAN      | BRE_HUMAN    | BRE    | Q9NXR7 | BRCA1-A complex subunit BRE (BRCA1/BRCA2-containing complex subunit 45) (Brain and reproductive organ-expressed protein)                                                              | 44 kDa   | 0.38  | 16  | 7  | 9  | 2  | 1  | 2  | 2  | 1  | 4  | 2  | 2  | 1.391082065 | 0% (0.31)   |
| NDUV2_HUMAN       | B2R4Q7_HUMAN |        | B2R4Q7 | cDNA, FLJ92180, highly similar to Homo sapiens brain protein 44 (BRP44), mRNA                                                                                                         | 14 kDa   | 0.3   | 16  | 7  | 9  | 3  | 1  | 2  | 1  | 1  | 3  | 1  | 4  | 1.391082065 | 0% (0.31)   |
| A4D0R2_HUMAN (+1) | GRB7_HUMAN   | GRB7   | Q14451 | Growth factor receptor-bound protein 7 (B47) (Epidermal growth factor receptor GRB-7) (GRB7 adapter protein)                                                                          | 60 kDa   | 0.15  | 16  | 7  | 9  | 1  | 0  | 2  | 4  | 4  | 4  | 1  | 0  | 1.391082065 | 0% (0.31)   |
| B2RBG3_HUMAN (+1) | NDUA4_HUMAN  | NDUFA4 | O00483 | NADH dehydrogenase [ubiquinone] 1 alpha subcomplex subunit 4 (Complex I-MLRQ) (CI-MLRQ) (NADH-ubiquinone oxidoreductase MLRQ subunit)                                                 | 9 kDa    | 0.085 | 16  | 7  | 9  | 5  | 0  | 0  | 2  | 4  | 2  | 2  | 1  | 1.391082065 | 0% (0.31)   |

|                   |              |         |        |                                                                                                                                                                                                                                                                                                                       |         |       |     |     |     |    |    |    |    |    |    |    |    |             |                 |
|-------------------|--------------|---------|--------|-----------------------------------------------------------------------------------------------------------------------------------------------------------------------------------------------------------------------------------------------------------------------------------------------------------------------|---------|-------|-----|-----|-----|----|----|----|----|----|----|----|----|-------------|-----------------|
| H15_HUMAN         | PHB_HUMAN    | PHB     | P35232 | Prohibitin                                                                                                                                                                                                                                                                                                            | 30 kDa  | 0.3   | 259 | 116 | 144 | 39 | 19 | 16 | 42 | 28 | 54 | 27 | 34 | 1.38778357  | 95%<br>(0.0044) |
| C163A_HUMAN       | BAP31_HUMAN  | BCAP31  | P51572 | B-cell receptor-associated protein 31 (BCR-associated protein 31) (Bap31) (6C6-AG tumor-associated antigen) (Protein CDM) (p28)                                                                                                                                                                                       | 28 kDa  | 0.1   | 101 | 45  | 56  | 13 | 7  | 9  | 15 | 6  | 13 | 14 | 24 | 1.386207484 | 0%<br>(0.056)   |
| PTPRF_HUMAN       | QCR1_HUMAN   | UQCRC1  | P31930 | Cytochrome b-c1 complex subunit 1, mitochondrial (Complex III subunit 1) (Core protein I) (Ubiquinol-cytochrome-c reductase complex core protein 1)                                                                                                                                                                   | 53 kDa  | 0.077 | 139 | 62  | 77  | 24 | 14 | 12 | 13 | 24 | 11 | 21 | 22 | 1.385557954 | 95%<br>(0.030)  |
| G3V198_HUMAN (+1) | B9A067_HUMAN | IMMT    | B9A067 | Mitochondrial inner membrane protein                                                                                                                                                                                                                                                                                  | 79 kDa  | 0.083 | 175 | 79  | 98  | 34 | 15 | 14 | 16 | 28 | 13 | 28 | 30 | 1.385252802 | 95%<br>(0.016)  |
| ARPC4_HUMAN (+1)  | SYEP_HUMAN   | EPRS    | P07814 | Bifunctional glutamate/proline--tRNA ligase (Bifunctional aminoacyl-tRNA synthetase) (Cell proliferation-inducing gene 32 protein) (Glutamyl-prolyl-tRNA synthetase) [Includes: Glutamate--tRNA ligase (EC 6.1.1.17) (Glutamyl-tRNA synthetase) (GluRS); Proline--tRNA ligase (EC 6.1.1.15) (Prolyl-tRNA synthetase)] | 171 kDa | 0.35  | 82  | 37  | 46  | 0  | 8  | 14 | 14 | 17 | 14 | 10 | 5  | 1.383301995 | 0%<br>(0.079)   |
| F8VPD4_HUMAN (+1) | USP9X_HUMAN  | USP9X   | Q93008 | Probable ubiquitin carboxyl-terminal hydrolase FAF-X (EC 3.4.19.12) (Deubiquitinating enzyme FAF-X) (Fat facets in mammals) (hFAM) (Fat facets protein-related, X-linked) (Ubiquitin thioesterase FAF-X) (Ubiquitin-specific protease 9, X chromosome) (Ubiquitin-specific-processing protease FAF-X)                 | 292 kDa | 0.097 | 45  | 20  | 25  | 3  | 9  | 5  | 4  | 1  | 17 | 7  | 0  | 1.383186167 | 0%<br>(0.16)    |
| B2RAK1_HUMAN (+1) | B3KNB4_HUMAN |         | B3KNB4 | cDNA FLJ14168 fis, clone NT2RP2001440, highly similar to 14-3-3 protein gamma                                                                                                                                                                                                                                         | 28 kDa  | 0.11  | 45  | 20  | 25  | 5  | 5  | 5  | 5  | 9  | 5  | 5  | 6  | 1.383186167 | 0%<br>(0.16)    |
| PRS10_HUMAN       | ELYS_HUMAN   | AHCTF1  | Q8WYP5 | Protein ELYS (Embryonic large molecule derived from yolk sac) (Protein MEL-28) (Putative AT-hook-containing transcription factor 1)                                                                                                                                                                                   | 253 kDa | 0.27  | 7   | 3   | 4   | 1  | 1  | 0  | 1  | 3  | 0  | 1  | 0  | 1.38307041  | 0%<br>(0.44)    |
| ZNT7_HUMAN        | B4DH53_HUMAN | MAP1S   | B4DH53 | MAP1S light chain (cDNA FLJ55328, highly similar to Homo sapiens BPY2 interacting protein 1 (BPY2IP1), mRNA)                                                                                                                                                                                                          | 110 kDa | 0.12  | 7   | 3   | 4   | 0  | 0  | 0  | 3  | 0  | 4  | 0  | 0  | 1.38307041  | 0%<br>(0.44)    |
| PPAL_HUMAN        | E7EX90_HUMAN | DCTN1   | E7EX90 | Dynactin subunit 1 (Uncharacterized protein)                                                                                                                                                                                                                                                                          | 139 kDa | 0.2   | 7   | 3   | 4   | 0  | 0  | 2  | 1  | 0  | 1  | 3  | 0  | 1.38307041  | 0%<br>(0.44)    |
| PUR6_HUMAN        | EDC4_HUMAN   | EDC4    | Q6P2E9 | Enhancer of mRNA-decapping protein 4 (Autoantigen Ge-1) (Autoantigen RCD-8) (Human enhancer of decapping large subunit) (Hedls)                                                                                                                                                                                       | 152 kDa | 0.32  | 7   | 3   | 4   | 1  | 1  | 1  | 0  | 4  | 0  | 0  | 0  | 1.38307041  | 0%<br>(0.44)    |
| B3KXZ4_HUMAN      | ODDB_HUMAN   | BCKDHB  | P21953 | 2-oxoisovalerate dehydrogenase subunit beta, mitochondrial (EC 1.2.4.4) (Branched-chain alpha-keto acid dehydrogenase E1 component beta chain) (BCKDE1B) (BCKDH E1-beta)                                                                                                                                              | 43 kDa  | 0.17  | 7   | 3   | 4   | 2  | 1  | 0  | 0  | 1  | 2  | 0  | 1  | 1.38307041  | 0%<br>(0.44)    |
| AK1A1_HUMAN       | GTPBA_HUMAN  | GTPBP10 | A4D1E9 | GTP-binding protein 10 (Protein obg homolog 2) (ObgH2)                                                                                                                                                                                                                                                                | 43 kDa  | 0.29  | 7   | 3   | 4   | 3  | 0  | 0  | 0  | 0  | 0  | 2  | 1  | 1.38307041  | 0%<br>(0.44)    |
| HEXB_HUMAN        | TMM68_HUMAN  | TMEM68  | Q96MH6 | Transmembrane protein 68                                                                                                                                                                                                                                                                                              | 37 kDa  | 0.17  | 7   | 3   | 4   | 3  | 0  | 0  | 0  | 2  | 0  | 0  | 2  | 1.38307041  | 0%<br>(0.44)    |
| SCPDL_HUMAN       | NDUB3_HUMAN  | NDUF3   | O43676 | NADH dehydrogenase [ubiquinone] 1 beta subcomplex subunit 3 (Complex I-B12) (CI-B12) (NADH-ubiquinone oxidoreductase B12 subunit)                                                                                                                                                                                     | 11 kDa  | 0.23  | 7   | 3   | 4   | 0  | 1  | 1  | 1  | 2  | 0  | 1  | 1  | 1.38307041  | 0%<br>(0.44)    |

|                   |              |         |        |                                                                                                                                                                                                                                                                                                                                                         |         |      |     |     |     |    |    |    |    |    |    |    |    |             |               |
|-------------------|--------------|---------|--------|---------------------------------------------------------------------------------------------------------------------------------------------------------------------------------------------------------------------------------------------------------------------------------------------------------------------------------------------------------|---------|------|-----|-----|-----|----|----|----|----|----|----|----|----|-------------|---------------|
| EST1_HUMAN        | H9NTY4_HUMAN | CYTB    | H9NTY4 | Cytochrome b                                                                                                                                                                                                                                                                                                                                            | 43 kDa  | 0.27 | 9   | 3   | 4   | 1  | 2  | 0  | 0  | 1  | 1  | 1  | 1  | 1.38307041  | 0% (0.44)     |
| CN166_HUMAN (+1)  | MECR_HUMAN   | MECR    | Q9BV79 | Trans-2-enoyl-CoA reductase, mitochondrial (EC 1.3.1.38) (Nuclear receptor-binding factor 1) (HsNrnf-1) (NRBF-1)                                                                                                                                                                                                                                        | 40 kDa  | 0.39 | 7   | 3   | 4   | 1  | 0  | 0  | 2  | 2  | 0  | 0  | 2  | 1.38307041  | 0% (0.44)     |
| B3KSW0_HUMAN (+5) | C9JAF7_HUMAN | SNAP29  | C9JAF7 | Synaptosomal-associated protein (Fragment)                                                                                                                                                                                                                                                                                                              | 18 kDa  | 0.26 | 7   | 3   | 4   | 1  | 1  | 1  | 0  | 0  | 0  | 1  | 3  | 1.38307041  | 0% (0.44)     |
| Q32Q62_HUMAN (+1) | F5GYJ5_HUMAN |         | F5GYJ5 | Uncharacterized protein                                                                                                                                                                                                                                                                                                                                 | 18 kDa  | 0.14 | 7   | 3   | 4   | 0  | 1  | 2  | 0  | 3  | 0  | 0  | 1  | 1.38307041  | 0% (0.44)     |
| RBBP4_HUMAN       | H7C525_HUMAN | CCDC58  | H7C525 | Coiled-coil domain-containing protein 58 (Fragment)                                                                                                                                                                                                                                                                                                     | 16 kDa  | 0.15 | 7   | 3   | 4   | 0  | 1  | 2  | 0  | 2  | 0  | 2  | 0  | 1.38307041  | 0% (0.44)     |
| AT1B1_HUMAN (+1)  | NADC_HUMAN   | QPRT    | Q15274 | Nicotinate-nucleotide pyrophosphorylase [carboxylating] (EC 2.4.2.19) (Quinolinate phosphoribosyltransferase [decarboxylating]) (QAPRTase) (QPRase)                                                                                                                                                                                                     | 31 kDa  | 0.18 | 7   | 3   | 4   | 1  | 1  | 1  | 0  | 3  | 0  | 1  | 0  | 1.38307041  | 0% (0.44)     |
| SF3A1_HUMAN       | RL7L_HUMAN   | RPL7L1  | Q6DKI1 | 60S ribosomal protein L7-like 1                                                                                                                                                                                                                                                                                                                         | 29 kDa  | 0.13 | 7   | 3   | 4   | 0  | 0  | 0  | 3  | 0  | 0  | 1  | 3  | 1.38307041  | 0% (0.44)     |
| A8K274_HUMAN (+1) | FAAH1_HUMAN  | FAAH    | O00519 | Fatty-acid amide hydrolase 1 (EC 3.5.1.99) (Anandamide amidohydrolase 1) (Oleamide hydrolase 1)                                                                                                                                                                                                                                                         | 63 kDa  | 0.17 | 7   | 3   | 4   | 3  | 0  | 0  | 0  | 0  | 4  | 0  | 0  | 1.38307041  | 0% (0.44)     |
| KCRU_HUMAN        | ZNT1_HUMAN   | SLC30A1 | Q9Y6M5 | Zinc transporter 1 (ZnT-1) (Solute carrier family 30 member 1)                                                                                                                                                                                                                                                                                          | 55 kDa  | 0.17 | 7   | 3   | 4   | 1  | 1  | 1  | 0  | 1  | 0  | 2  | 1  | 1.38307041  | 0% (0.44)     |
| Q6NUK7_HUMAN      | CLYBL_HUMAN  | CLYBL   | Q8NOX4 | Citrate lyase subunit beta-like protein, mitochondrial (Citrate lyase beta-like) (EC 4.1.-.-)                                                                                                                                                                                                                                                           | 37 kDa  | 0.14 | 7   | 3   | 4   | 2  | 1  | 0  | 0  | 3  | 0  | 0  | 1  | 1.38307041  | 0% (0.44)     |
| Q6NZ55_HUMAN (+1) | B4DN34_HUMAN | MRPL48  | B4DN34 | 39S ribosomal protein L48, mitochondrial (cDNA FLJ60720, highly similar to Homo sapiens mitochondrial ribosomal protein L48 (MRPL48), transcript variant 1, mRNA)                                                                                                                                                                                       | 22 kDa  | 0.19 | 7   | 3   | 4   | 1  | 1  | 1  | 0  | 2  | 1  | 0  | 1  | 1.38307041  | 0% (0.44)     |
| B3KRY3_HUMAN (+1) | A8MUB1_HUMAN | TUBA4A  | A8MUB1 | Tubulin alpha-4A chain (Tubulin, alpha 1 (Testis specific), isoform CRA_a) (cDNA FLJ58687, highly similar to Tubulin alpha-4 chain)                                                                                                                                                                                                                     | 48 kDa  | 0.14 | 390 | 174 | 215 | 48 | 43 | 44 | 39 | 53 | 69 | 48 | 47 | 1.382728791 | 95% (0.00071) |
| DYN2_HUMAN        | UCRL_HUMAN   | UQCRFS1 | P47985 | Cytochrome b-c1 complex subunit Rieske, mitochondrial (EC 1.10.2.2) (Complex III subunit 5) (Cytochrome b-c1 complex subunit 5) (Rieske iron-sulfur protein) (RISP) (Ubiquinol-cytochrome c reductase iron-sulfur subunit) [Cleaved into: Cytochrome b-c1 complex subunit 11 (Complex III subunit IX) (Ubiquinol-cytochrome c reductase 8 kDa protein)] | 30 kDa  | 0.16 | 36  | 16  | 20  | 5  | 4  | 4  | 3  | 8  | 2  | 3  | 7  | 1.379339512 | 0% (0.20)     |
| Q6DEN2_HUMAN      | F6S0T5_HUMAN | KDM1A   | F6S0T5 | Lysine-specific histone demethylase 1A                                                                                                                                                                                                                                                                                                                  | 95 kDa  | 0.26 | 36  | 16  | 20  | 2  | 6  | 7  | 1  | 5  | 0  | 12 | 3  | 1.379339512 | 0% (0.20)     |
| Q8WVX7_HUMAN (+1) | RT09_HUMAN   | MRPS9   | P82933 | 28S ribosomal protein S9, mitochondrial (MRP-S9) (S9mt)                                                                                                                                                                                                                                                                                                 | 46 kDa  | 0.32 | 36  | 16  | 20  | 5  | 6  | 2  | 3  | 8  | 3  | 2  | 7  | 1.379339512 | 0% (0.20)     |
| RS7_HUMAN         | A6NNI4_HUMAN | CD9     | A6NNI4 | CD9 antigen                                                                                                                                                                                                                                                                                                                                             | 18 kDa  | 0.23 | 36  | 16  | 20  | 4  | 5  | 5  | 2  | 5  | 6  | 4  | 5  | 1.379339512 | 0% (0.20)     |
| H3BS72_HUMAN (+1) | SAMH1_HUMAN  | SAMHD1  | Q9Y3Z3 | Deoxynucleoside triphosphate triphosphohydrolase SAMHD1 (dNTPase) (EC 3.1.5.-) (Dendritic cell-derived IFNG-induced protein) (DCIP) (Monocyte protein 5) (MOP-5) (SAM domain and HD domain-containing protein 1)                                                                                                                                        | 72 kDa  | 0.16 | 65  | 29  | 36  | 0  | 8  | 11 | 10 | 3  | 16 | 12 | 5  | 1.378890174 | 0% (0.11)     |
| G3V203_HUMAN (+2) | ACOX1_HUMAN  | ACOX1   | Q15067 | Peroxisomal acyl-coenzyme A oxidase 1 (AOX) (EC 1.3.3.6) (Palmitoyl-CoA oxidase) (Straight-chain acyl-CoA oxidase) (SCOX)                                                                                                                                                                                                                               | 74 kDa  | 0.35 | 114 | 51  | 63  | 10 | 8  | 10 | 23 | 2  | 32 | 19 | 11 | 1.377087673 | 95% (0.049)   |
| NDUS8_HUMAN (+1)  | AT2B1_HUMAN  | ATP2B1  | P20020 | Plasma membrane calcium-transporting ATPase 1                                                                                                                                                                                                                                                                                                           | 139 kDa | 0.15 | 56  | 25  | 31  | 8  | 6  | 4  | 7  | 10 | 0  | 8  | 0  | 1.375689004 | 0% (0.13)     |



|                   |              |          |        |                                                                                                                                                                                                                         |         |       |     |     |     |    |    |    |    |     |    |    |    |                 |                  |
|-------------------|--------------|----------|--------|-------------------------------------------------------------------------------------------------------------------------------------------------------------------------------------------------------------------------|---------|-------|-----|-----|-----|----|----|----|----|-----|----|----|----|-----------------|------------------|
|                   |              |          |        | (PMCA1) (EC 3.6.3.8)<br>(Plasma membrane calcium ATPase isoform 1) (Plasma membrane calcium pump isoform 1)                                                                                                             |         |       |     |     |     |    |    |    |    |     |    |    |    |                 |                  |
| J3KN00_HUMAN      | DX39A_HUMAN  | DDX39A   | O00148 | ATP-dependent RNA helicase DDX39A (EC 3.6.4.13) (DEAD box protein 39) (Nuclear RNA helicase URH49)                                                                                                                      | 49 kDa  | 0.32  | 75  | 34  | 42  | 2  | 8  | 9  | 15 | 12  | 14 | 12 | 4  | 1.3739323<br>93 | 0%<br>(0.094)    |
| APT_HUMAN         | B7Z3E3_HUMAN |          | B7Z3E3 | Reticulon                                                                                                                                                                                                               | 101 kDa | 0.34  | 27  | 12  | 15  | 5  | 2  | 2  | 3  | 4   | 3  | 3  | 5  | 1.3731877<br>13 | 0%<br>(0.24)     |
| A8K6K8_HUMAN (+1) | Q53HV2_HUMAN |          | Q53HV2 | Chaperonin containing TCP1, subunit 7 (Eta) variant (Fragment)                                                                                                                                                          | 59 kDa  | 0.19  | 48  | 21  | 26  | 1  | 6  | 5  | 9  | 9   | 11 | 5  | 1  | 1.3713471<br>97 | 0%<br>(0.16)     |
| B4DZF2_HUMAN (+4) | B2R8G6_HUMAN |          | B2R8G6 | cDNA, FLJ93891, Homo sapiens FK506 binding protein 8, 38kDa (FKBP8), mRNA                                                                                                                                               | 38 kDa  | 0.094 | 47  | 21  | 26  | 4  | 10 | 3  | 4  | 6   | 6  | 9  | 5  | 1.3713471<br>97 | 0%<br>(0.16)     |
| PTGIS_HUMAN (+2)  | HEAT1_HUMAN  | HEATR1   | Q9H583 | HEAT repeat-containing protein 1 (Protein BAP28) [Cleaved into: HEAT repeat-containing protein 1, N-terminally processed]                                                                                               | 242 kDa | 0.28  | 67  | 30  | 37  | 5  | 6  | 1  | 18 | 16  | 3  | 11 | 7  | 1.3706004<br>34 | 0%<br>(0.11)     |
| DCXR_HUMAN        | B3KPS3_HUMAN |          | B3KPS3 | cDNA FLJ52131 fis, clone PEBLM2000267, highly similar to Tubulin alpha-ubiquitous chain                                                                                                                                 | 46 kDa  | 0.28  | 472 | 212 | 259 | 57 | 55 | 55 | 46 | 65  | 80 | 60 | 56 | 1.3677410<br>16 | 95%<br>(0.00034) |
| SEPT9_HUMAN       | LACTB_HUMAN  | LACTB    | P83111 | Serine beta-lactamase-like protein LACTB, mitochondrial (EC 3.4.-.-)                                                                                                                                                    | 61 kDa  | 0.19  | 57  | 26  | 32  | 15 | 5  | 3  | 3  | 1   | 3  | 9  | 19 | 1.3662987<br>35 | 0%<br>(0.13)     |
| RECQ1_HUMAN       | MDHM_HUMAN   | MDH2     | P40926 | Malate dehydrogenase, mitochondrial (EC 1.1.1.37)                                                                                                                                                                       | 36 kDa  | 0.19  | 476 | 214 | 261 | 43 | 56 | 49 | 67 | 109 | 55 | 46 | 52 | 1.3654501<br>84 | 95%<br>(0.00034) |
| D3DR31_HUMAN (+1) | PUR6_HUMAN   | PAICS    | P22234 | Multifunctional protein ADE2 [Includes: Phosphoribosylaminoimidazole e-succinocarboxamide synthase (EC 6.3.2.6) (SAICAR synthetase); Phosphoribosylaminoimidazole e carboxylase (EC 4.1.1.21) (AIR carboxylase) (AIRC)] | 47 kDa  | 0.3   | 39  | 17  | 21  | 0  | 6  | 6  | 5  | 11  | 5  | 5  | 1  | 1.3651147<br>42 | 0%<br>(0.20)     |
| RRP5_HUMAN        | F162A_HUMAN  | FAM162A  | Q96A26 | Protein FAM162A (E2-induced gene 5 protein) (Growth and transformation-dependent protein) (HGTD-P)                                                                                                                      | 17 kDa  | 0.051 | 36  | 17  | 21  | 2  | 4  | 3  | 7  | 6   | 3  | 2  | 9  | 1.3651147<br>42 | 0%<br>(0.20)     |
| Q0VAB1_HUMAN      | B4DE36_HUMAN |          | B4DE36 | Glucose-6-phosphate isomerase (EC 5.3.1.9)                                                                                                                                                                              | 60 kDa  | 0.12  | 171 | 77  | 94  | 8  | 20 | 24 | 26 | 23  | 28 | 22 | 22 | 1.3633396<br>91 | 95%<br>(0.023)   |
| D6RER5_HUMAN (+2) | B7Z4S9_HUMAN | BUD31    | B7Z4S9 | BUD31 homolog (Yeast), isoform CRA_b (cDNA FLJ53814, highly similar to Protein G10 homolog) (cDNA, FLJ79376, highly similar to Protein G10 homolog)                                                                     | 17 kDa  | 0.17  | 18  | 8   | 10  | 2  | 2  | 2  | 2  | 5   | 0  | 4  | 2  | 1.3617403<br>05 | 0%<br>(0.31)     |
| B4DE59_HUMAN      | SBP1_HUMAN   | SELENBP1 | Q13228 | Selenium-binding protein 1 (56 kDa selenium-binding protein) (SBP56) (SP56)                                                                                                                                             | 52 kDa  | 0.44  | 18  | 8   | 10  | 0  | 1  | 1  | 6  | 2   | 4  | 4  | 0  | 1.3617403<br>05 | 0%<br>(0.31)     |
| ELOV1_HUMAN (+1)  | B5MCA4_HUMAN | EPCAM    | B5MCA4 | Epithelial cell adhesion molecule                                                                                                                                                                                       | 38 kDa  | 0.079 | 49  | 22  | 27  | 6  | 5  | 4  | 7  | 10  | 4  | 8  | 5  | 1.3605267<br>81 | 0%<br>(0.16)     |
| B5MCX3_HUMAN (+1) | B3KX72_HUMAN |          | B3KX72 | cDNA FLJ44920 fis, clone BRAMY3011501, highly similar to Heterogeneous nuclear ribonucleoprotein U                                                                                                                      | 83 kDa  | 0.3   | 235 | 107 | 130 | 22 | 33 | 25 | 28 | 39  | 23 | 40 | 28 | 1.3581649<br>43 | 95%<br>(0.0098)  |
| G5E972_HUMAN (+1) | B2RAF9_HUMAN |          | B2RAF9 | cDNA, FLJ94888, highly similar to Homo sapiens suppression of tumorigenicity 14 (colon carcinoma, matrilysin, epithin) (ST14), mRNA                                                                                     | 95 kDa  | 0.24  | 28  | 13  | 16  | 2  | 4  | 5  | 2  | 5   | 0  | 5  | 6  | 1.3553995<br>11 | 0%<br>(0.25)     |
| RTCB_HUMAN        | EMC1_HUMAN   | EMC1     | Q8N766 | ER membrane protein complex subunit 1                                                                                                                                                                                   | 112 kDa | 0.16  | 82  | 37  | 45  | 15 | 6  | 10 | 8  | 8   | 11 | 10 | 16 | 1.3540062<br>72 | 0%<br>(0.096)    |
| B4E175_HUMAN      | PRDX6_HUMAN  | PRDX6    | P30041 | Peroxisomal oxidase (EC 1.1.1.15) (1-Cys peroxidase) (1-Cys PRX) (24 kDa protein) (Acidic calcium-independent phospholipase A2) (aiPLA2) (EC 3.1.1.-) (Antioxidant protein 2) (Liver 2D page spot                       | 25 kDa  | 0.2   | 93  | 42  | 51  | 5  | 9  | 9  | 23 | 14  | 17 | 14 | 6  | 1.3528515<br>93 | 0%<br>(0.081)    |





|                   |              |          |        |                                                                                                                                                                                                                                                                          |         |       |     |     |     |    |    |    |    |    |    |    |    |             |              |
|-------------------|--------------|----------|--------|--------------------------------------------------------------------------------------------------------------------------------------------------------------------------------------------------------------------------------------------------------------------------|---------|-------|-----|-----|-----|----|----|----|----|----|----|----|----|-------------|--------------|
| SMHD1_HUMAN       | I433T_HUMAN  | YWHAQ    | P27348 | I4-3-3 protein theta (I4-3-3 protein T-cell) (I4-3-3 protein tau) (Protein HS1)                                                                                                                                                                                          | 28 kDa  | 0.071 | 59  | 27  | 32  | 5  | 6  | 7  | 9  | 11 | 6  | 8  | 7  | 1.317917239 | 0% (0.17)    |
| B2RBA6_HUMAN (+1) | B4DZCO_HUMAN |          | B4DZCO | cDNA FLJ51771, highly similar to SWI/SNF-related matrix-associated-dependent regulator of chromatin subfamily A member5 (EC 3.6.1.-)                                                                                                                                     | 117 kDa | 0.23  | 97  | 44  | 52  | 11 | 10 | 12 | 12 | 30 | 3  | 11 | 9  | 1.31778964  | 0% (0.098)   |
| A8KA84_HUMAN (+1) | B7Z532_HUMAN |          | B7Z532 | cDNA FLJ51028, highly similar to 60 kDa heat shock protein, mitochondrial                                                                                                                                                                                                | 27 kDa  | 0.16  | 360 | 166 | 195 | 38 | 50 | 46 | 32 | 48 | 38 | 54 | 56 | 1.314624976 | 95% (0.0048) |
| RCN1_HUMAN        | ILVBL_HUMAN  | ILVBL    | A1L0T0 | Acetolactate synthase-like protein (EC 2.2.1.-) (IlvB-like protein)                                                                                                                                                                                                      | 68 kDa  | 0.33  | 99  | 45  | 53  | 23 | 5  | 3  | 14 | 11 | 15 | 14 | 13 | 1.313511062 | 0% (0.099)   |
| F8WCY5_HUMAN (+1) | G3V198_HUMAN | NUP160   | G3V198 | Nuclear pore complex protein Nup160 (Nucleoporin 160kDa, isoform CRA_e)                                                                                                                                                                                                  | 140 kDa | 0.18  | 48  | 22  | 26  | 3  | 7  | 5  | 7  | 5  | 5  | 7  | 9  | 1.312347656 | 0% (0.20)    |
| RM44_HUMAN        | NU205_HUMAN  | NUP205   | Q92621 | Nuclear pore complex protein Nup205 (205 kDa nucleoporin) (Nucleoporin Nup205)                                                                                                                                                                                           | 228 kDa | 0.2   | 137 | 63  | 74  | 14 | 15 | 17 | 18 | 15 | 8  | 35 | 17 | 1.311625665 | 0% (0.062)   |
| B3KQF5_HUMAN (+1) | A7E2D8_HUMAN | ATP2B4   | A7E2D8 | ATP2B4 protein                                                                                                                                                                                                                                                           | 129 kDa | 0.3   | 61  | 28  | 33  | 14 | 4  | 2  | 8  | 11 | 5  | 6  | 11 | 1.311143768 | 0% (0.17)    |
| DERL1_HUMAN       | RAB6B_HUMAN  | RAB6B    | Q9NRW1 | Ras-related protein Rab-6B                                                                                                                                                                                                                                               | 23 kDa  | 0.18  | 74  | 34  | 40  | 11 | 7  | 6  | 10 | 11 | 14 | 6  | 9  | 1.310360226 | 0% (0.14)    |
| GSLG1_HUMAN       | B4DGP8_HUMAN | CANX     | B4DGP8 | Calnexin (cDNA FLJ55574, highly similar to Calnexin)                                                                                                                                                                                                                     | 72 kDa  | 0.07  | 359 | 165 | 193 | 47 | 38 | 39 | 40 | 45 | 52 | 43 | 53 | 1.309033546 | 95% (0.0055) |
| CTL2_HUMAN        | TBB4A_HUMAN  | TUBB4A   | P04350 | Tubulin beta-4A chain (Tubulin 5 beta) (Tubulin beta-4 chain)                                                                                                                                                                                                            | 50 kDa  | 0.12  | 496 | 229 | 267 | 65 | 49 | 56 | 60 | 71 | 80 | 63 | 55 | 1.305561414 | 95% (0.0015) |
| SPTN2_HUMAN       | ELAV1_HUMAN  | ELAVL1   | Q15717 | ELAV-like protein 1 (Huantigen R) (HuR)                                                                                                                                                                                                                                  | 36 kDa  | 0.067 | 63  | 29  | 34  | 3  | 9  | 13 | 4  | 10 | 6  | 12 | 6  | 1.304818244 | 0% (0.17)    |
| B7Z7G9_HUMAN      | TMED7_HUMAN  | TMED7    | Q9Y3B3 | Transmembrane emp24 domain-containing protein 7 (p24 family protein gamma-3) (p24gamma3) (p27)                                                                                                                                                                           | 25 kDa  | 0.14  | 50  | 23  | 27  | 7  | 5  | 5  | 6  | 6  | 9  | 7  | 5  | 1.30440582  | 0% (0.20)    |
| A8K3M9_HUMAN (+1) | PRS8_HUMAN   | PSMC5    | P62195 | 26S protease regulatory subunit 8 (26S proteasome AAA-ATPase subunit RPT6) (Proteasome 26S subunit ATPase 5) (Proteasome subunit p45) (Thyroid hormone receptor-interacting protein 1) (TRIP1) (p45/SUG)                                                                 | 46 kDa  | 0.29  | 37  | 17  | 20  | 1  | 5  | 5  | 6  | 2  | 12 | 4  | 3  | 1.303742511 | 0% (0.25)    |
| B3KTT0_HUMAN (+1) | B1AK13_HUMAN | HMGCL    | B1AK13 | 3-hydroxymethyl-3-methylglutaryl-Coenzyme A lyase (Hydroxymethylglutaricaciduria), isoform CRA_b (Hydroxymethylglutaryl-CoA lyase, mitochondrial) (cDNA FLJ16378 fis, clone TKIDN2016399, highly similar to Hydroxymethylglutaryl-CoA lyase, mitochondrial (EC 4.1.3.4)) | 32 kDa  | 0.19  | 37  | 17  | 20  | 4  | 2  | 3  | 9  | 9  | 3  | 3  | 5  | 1.303742511 | 0% (0.25)    |
| Q59GK9_HUMAN      | SMHD1_HUMAN  | SMCHD1   | A6NHR9 | Structural maintenance of chromosomes flexible hinge domain-containing protein 1 (SMC hinge domain-containing protein 1)                                                                                                                                                 | 226 kDa | 0.16  | 37  | 17  | 20  | 0  | 7  | 9  | 2  | 5  | 5  | 10 | 0  | 1.303742511 | 0% (0.25)    |
| DNJB1_HUMAN (+1)  | G5E9V5_HUMAN | MRPS22   | G5E9V5 | 28S ribosomal protein S22, mitochondrial (Mitochondrial ribosomal protein S22, isoform CRA_a)                                                                                                                                                                            | 41 kDa  | 0.23  | 37  | 17  | 20  | 6  | 4  | 3  | 4  | 8  | 2  | 3  | 7  | 1.303742511 | 0% (0.25)    |
| SSRD_HUMAN        | PGRC2_HUMAN  | PGRMC2   | O15173 | Membrane-associated progesterone receptor component 2 (Progesterone membrane-binding protein) (Steroid receptor protein DG6)                                                                                                                                             | 24 kDa  | 0.27  | 37  | 17  | 20  | 3  | 4  | 5  | 5  | 4  | 6  | 4  | 6  | 1.303742511 | 0% (0.25)    |
| B2RDW0_HUMAN (+2) | Q860C0_HUMAN | HLA-DRB1 | Q860C0 | MHC class II antigen                                                                                                                                                                                                                                                     | 30 kDa  | 0.48  | 37  | 17  | 20  | 1  | 3  | 3  | 9  | 2  | 4  | 2  | 12 | 1.303742511 | 0% (0.25)    |
| G5E9V5_HUMAN      | MYO1E_HUMAN  | MYO1E    | Q12965 | Unconventional myosin-Ie (Myosin-Ic) (Unconventional myosin IE)                                                                                                                                                                                                          | 127 kDa | 0.3   | 37  | 17  | 20  | 6  | 5  | 4  | 2  | 5  | 0  | 6  | 7  | 1.303742511 | 0% (0.25)    |

|                   |              |          |        |                                                                                                                                                                                                                                                                                                                                                                                                                  |         |      |    |    |    |    |    |    |    |    |    |    |    |             |           |
|-------------------|--------------|----------|--------|------------------------------------------------------------------------------------------------------------------------------------------------------------------------------------------------------------------------------------------------------------------------------------------------------------------------------------------------------------------------------------------------------------------|---------|------|----|----|----|----|----|----|----|----|----|----|----|-------------|-----------|
| MTA2_HUMAN        | MCCA_HUMAN   | MCCC1    | Q96RQ3 | Methylcrotonoyl-CoA carboxylase subunit alpha, mitochondrial (MCCase subunit alpha) (EC 6.4.1.4) (3-methylcrotonoyl-CoA carboxylase 1) (3-methylcrotonoyl-CoA carboxylase biotin-containing subunit) (3-methylcrotonoyl-CoA:carbon dioxide ligase subunit alpha)                                                                                                                                                 | 80 kDa  | 0.13 | 24 | 11 | 13 | 6  | 1  | 3  | 1  | 7  | 0  | 3  | 3  | 1.30245966  | 0% (0.31) |
| B4DRV2_HUMAN (+4) | ALG3_HUMAN   | ALG3     | Q92685 | Dol-P-Man:Man(5)GlcNAc(2)-PP-Dol alpha-1,3-mannosyltransferase (EC 2.4.1.255) (Asparagine-linked glycosylation protein 3 homolog) (Dol-P-Man-dependent alpha(1-3)-mannosyltransferase) (Dolichyl-P-Man:Man(5)GlcNAc(2)-PP-dolichyl mannosyltransferase) (Dolichyl-phosphate-mannose-glycolipid alpha-mannosyltransferase) (Not56-like protein)                                                                   | 50 kDa  | 0.2  | 23 | 11 | 13 | 3  | 2  | 3  | 3  | 3  | 2  | 3  | 4  | 1.30245966  | 0% (0.31) |
| B4DYU3_HUMAN      | P3H1_HUMAN   | LEPRE1   | Q32P28 | Prolyl 3-hydroxylase 1 (EC 1.14.11.7) (Growth suppressor 1) (Leucine- and proline-enriched proteoglycan 1) (Leprecan-1)                                                                                                                                                                                                                                                                                          | 83 kDa  | 0.19 | 25 | 11 | 13 | 1  | 6  | 3  | 1  | 2  | 6  | 3  | 2  | 1.30245966  | 0% (0.31) |
| A8K4T6_HUMAN (+1) | DHB11_HUMAN  | HSD17B11 | Q8NBQ5 | Estradiol 17-beta-dehydrogenase 11 (EC 1.1.1.62) (17-beta-hydroxysteroid dehydrogenase 11) (17-beta-HSD 11) (17bHSD11) (17betaHSD11) (17-beta-hydroxysteroid dehydrogenase XI) (17-beta-HSD XI) (17betaHSDXI) (Cutaneous T-cell lymphoma-associated antigen HD-CL-03) (CTCL-associated antigen HD-CL-03) (Dehydrogenase/reductase SDR family member 8) (Retinal short-chain dehydrogenase/reductase 2) (retSDR2) | 33 kDa  | 0.24 | 90 | 42 | 49 | 11 | 9  | 6  | 15 | 0  | 20 | 16 | 14 | 1.301030343 | 0% (0.12) |
| HMGB1_HUMAN       | PDC6L_HUMAN  | PDCD6IP  | Q8WUM4 | Programmed cell death 6-interacting protein (PDCD6-interacting protein) (ALG-2-interacting protein 1) (ALG-2-interacting protein X) (Hp95)                                                                                                                                                                                                                                                                       | 96 kDa  | 0.23 | 79 | 36 | 42 | 9  | 12 | 8  | 7  | 15 | 8  | 13 | 6  | 1.300130787 | 0% (0.14) |
| TPBG_HUMAN        | Q59G75_HUMAN |          | Q59G75 | Isoleucyl-tRNA synthetase, cytoplasmic variant (Fragment)                                                                                                                                                                                                                                                                                                                                                        | 146 kDa | 0.16 | 65 | 30 | 35 | 2  | 10 | 12 | 5  | 13 | 14 | 6  | 2  | 1.298897664 | 0% (0.17) |
| ERGH1_HUMAN       | RAB3D_HUMAN  | RAB3D    | O95716 | Ras-related protein Rab-3D                                                                                                                                                                                                                                                                                                                                                                                       | 24 kDa  | 0.17 | 65 | 30 | 35 | 14 | 5  | 4  | 7  | 9  | 10 | 5  | 11 | 1.298897664 | 0% (0.17) |
| B2R6U8_HUMAN (+1) | NBAS_HUMAN   | NBAS     | A2RRP1 | Neuroblastoma-amplified sequence (Neuroblastoma-amplified gene protein)                                                                                                                                                                                                                                                                                                                                          | 269 kDa | 0.43 | 11 | 5  | 6  | 1  | 1  | 2  | 1  | 2  | 0  | 2  | 2  | 1.298772968 | 0% (0.42) |
| UCRL_HUMAN        | RFC4_HUMAN   | RFC4     | P35249 | Replication factor C subunit 4 (Activator 1 37 kDa subunit) (A1 37 kDa subunit) (Activator 1 subunit 4) (Replication factor C 37 kDa subunit) (RF-C 37 kDa subunit) (RFC37)                                                                                                                                                                                                                                      | 40 kDa  | 0.14 | 11 | 5  | 6  | 0  | 1  | 2  | 2  | 4  | 1  | 1  | 0  | 1.298772968 | 0% (0.42) |
| A8YXX5_HUMAN      | S27A3_HUMAN  | SLC27A3  | Q5K4L6 | Long-chain fatty acid transport protein 3 (FATP-3) (Fatty acid transport protein 3) (EC 6.2.1.-) (Solute carrier family 27 member 3) (Very long-chain acyl-CoA synthetase homolog 3) (VLCS-3)                                                                                                                                                                                                                    | 79 kDa  | 0.16 | 10 | 5  | 6  | 0  | 2  | 2  | 1  | 0  | 2  | 1  | 3  | 1.298772968 | 0% (0.42) |
| B5BU25_HUMAN (+2) | E9PKP7_HUMAN | UBTF     | E9PKP7 | Nucleolar transcription factor 1                                                                                                                                                                                                                                                                                                                                                                                 | 87 kDa  | 0.14 | 11 | 5  | 6  | 1  | 1  | 3  | 0  | 6  | 0  | 0  | 0  | 1.298772968 | 0% (0.42) |

|                   |              |          |        |                                                                                                                                                                                                                                                                                                                     |         |       |     |    |    |    |    |    |    |    |    |    |    |             |            |
|-------------------|--------------|----------|--------|---------------------------------------------------------------------------------------------------------------------------------------------------------------------------------------------------------------------------------------------------------------------------------------------------------------------|---------|-------|-----|----|----|----|----|----|----|----|----|----|----|-------------|------------|
| PBIP1_HUMAN       | FMNL_HUMAN   | FMNL1    | O95466 | Formin-like protein 1 (CLL-associated antigen KW-13) (Leukocyte formin)                                                                                                                                                                                                                                             | 122 kDa | 0.13  | 11  | 5  | 6  | 0  | 2  | 0  | 3  | 0  | 3  | 2  | 1  | 1.298772968 | 0% (0.42)  |
| F6S0T5_HUMAN      | GUAA_HUMAN   | GMPS     | P49915 | GMP synthase [glutamine-hydrolyzing] (EC 6.3.5.2) (GMP synthetase) (Glutamine amidotransferase)                                                                                                                                                                                                                     | 77 kDa  | 0.16  | 11  | 5  | 6  | 0  | 1  | 1  | 3  | 1  | 3  | 2  | 0  | 1.298772968 | 0% (0.42)  |
| DKC1_HUMAN        | B2RE59_HUMAN |          | B2RE59 | cDNA, FLJ93148, highly similar to Homo sapiens RCD1 required for cell differentiation 1 homolog (S. pombe) (RQCD1), mRNA                                                                                                                                                                                            | 34 kDa  | 0.086 | 11  | 5  | 6  | 1  | 2  | 1  | 1  | 1  | 3  | 1  | 1  | 1.298772968 | 0% (0.42)  |
| DDRKG_HUMAN       | B4DK32_HUMAN |          | B4DK32 | cDNA FLJ61095, highly similar to Ubiquitin conjugation factor E4 A (Fragment)                                                                                                                                                                                                                                       | 120 kDa | 0.21  | 11  | 5  | 6  | 0  | 4  | 1  | 0  | 1  | 4  | 1  | 0  | 1.298772968 | 0% (0.42)  |
| B3KSH1_HUMAN (+2) | ATPF2_HUMAN  | ATPAF2   | Q8NSM1 | ATP synthase mitochondrial F1 complex assembly factor 2 (ATP12 homolog)                                                                                                                                                                                                                                             | 33 kDa  | 0.21  | 11  | 5  | 6  | 2  | 2  | 0  | 1  | 4  | 0  | 0  | 2  | 1.298772968 | 0% (0.42)  |
| ALG1_HUMAN        | TM245_HUMAN  | TMEM245  | Q9H330 | Transmembrane protein 245 (Protein CG-2)                                                                                                                                                                                                                                                                            | 101 kDa | 0.11  | 11  | 5  | 6  | 1  | 2  | 2  | 0  | 2  | 1  | 1  | 2  | 1.298772968 | 0% (0.42)  |
| H0YKW5_HUMAN      | B7ZSX7_HUMAN | WARS2    | B7ZSX7 | Tryptophan-tRNA ligase, mitochondrial (cDNA FLJ50844, highly similar to Tryptophanyl-tRNA synthetase, mitochondrial (EC 6.1.1.2))                                                                                                                                                                                   | 30 kDa  | 0.19  | 11  | 5  | 6  | 0  | 1  | 1  | 3  | 0  | 3  | 0  | 3  | 1.298772968 | 0% (0.42)  |
| A8K529_HUMAN (+1) | B1AJY5_HUMAN | PSMD10   | B1AJY5 | 26S proteasome non-ATPase regulatory subunit 10                                                                                                                                                                                                                                                                     | 20 kDa  | 0.12  | 10  | 5  | 6  | 0  | 3  | 1  | 1  | 1  | 4  | 1  | 0  | 1.298772968 | 0% (0.42)  |
| B3KMR5_HUMAN (+1) | IF6_HUMAN    | EIF6     | P56537 | Eukaryotic translation initiation factor 6 (eIF-6) (B2) (GCN homolog) (B4 integrin interactor) (CAB) (p27(BBP))                                                                                                                                                                                                     | 27 kDa  | 0.066 | 11  | 5  | 6  | 0  | 2  | 1  | 2  | 4  | 0  | 1  | 1  | 1.298772968 | 0% (0.42)  |
| MA2A1_HUMAN       | QCR9_HUMAN   | UQCR10   | Q9UDW1 | Cytochrome b-c1 complex subunit 9 (Complex III subunit 9) (Complex III subunit X) (Cytochrome c1 non-heme 7 kDa protein) (Ubiquinol-cytochrome c reductase complex 7.2 kDa protein)                                                                                                                                 | 7 kDa   | 0.1   | 11  | 5  | 6  | 1  | 1  | 1  | 2  | 2  | 1  | 1  | 2  | 1.298772968 | 0% (0.42)  |
| RMD3_HUMAN        | RB22A_HUMAN  | RAB22A   | Q9UL26 | Ras-related protein Rab-22A (Rab-22)                                                                                                                                                                                                                                                                                | 22 kDa  | 0.24  | 11  | 5  | 6  | 3  | 0  | 0  | 0  | 0  | 0  | 2  | 0  | 1.298772968 | 0% (0.42)  |
| AP2A1_HUMAN       | P5CS_HUMAN   | ALDH18A1 | P54886 | Delta-1-pyrroline-5-carboxylate synthase (P5CS) (Aldehyde dehydrogenase family 18 member A1) [Includes: Glutamate 5-kinase (GK) (EC 2.7.2.11) (Gamma-glutamyl kinase); Gamma-glutamyl phosphate reductase (GPR) (EC 1.2.1.41) (Glutamate-5-semialdehyde dehydrogenase) (Glutamyl-gamma-semialdehyde dehydrogenase)] | 87 kDa  | 0.18  | 106 | 49 | 57 | 15 | 15 | 10 | 8  | 20 | 17 | 8  | 13 | 1.298100355 | 0% (0.099) |
| MIRO2_HUMAN       | Q53GC2_HUMAN |          | Q53GC2 | RAB4A, member RAS oncogene family variant (Fragment)                                                                                                                                                                                                                                                                | 24 kDa  | 0.14  | 52  | 24 | 28 | 7  | 6  | 0  | 0  | 6  | 6  | 7  | 9  | 1.297093177 | 0% (0.20)  |
| A0JLQ5_HUMAN (+1) | LETM1_HUMAN  | LETM1    | O95202 | LETM1 and EF-hand domain-containing protein 1, mitochondrial (Leucine zipper-EF-hand-containing transmembrane protein 1)                                                                                                                                                                                            | 83 kDa  | 0.11  | 107 | 50 | 58 | 16 | 10 | 16 | 10 | 17 | 6  | 17 | 18 | 1.294623718 | 0% (0.100) |
| PRS6B_HUMAN       | H3BS72_HUMAN | PTPLAD1  | H3BS72 | Very-long-chain (3R)-3-hydroxyacyl-[acyl-carrier protein] dehydratase 2                                                                                                                                                                                                                                             | 47 kDa  | 0.12  | 39  | 18 | 21 | 9  | 3  | 3  | 3  | 3  | 9  | 6  | 3  | 1.294183059 | 0% (0.25)  |
| CPNS1_HUMAN       | CHI0_HUMAN   | HSPE1    | P61604 | 10 kDa heat shock protein, mitochondrial (Hsp10) (10 kDa chaperonin) (Chaperonin 10) (CPN10) (Early-pregnancy factor) (EPF)                                                                                                                                                                                         | 11 kDa  | 0.18  | 66  | 31 | 36 | 5  | 9  | 10 | 7  | 10 | 9  | 8  | 9  | 1.293344358 | 0% (0.17)  |
| PRP6_HUMAN        | NOP58_HUMAN  | NOP58    | Q9Y2X3 | Nucleolar protein 58 (Nucleolar protein 5)                                                                                                                                                                                                                                                                          | 60 kDa  | 0.073 | 125 | 58 | 67 | 9  | 12 | 17 | 21 | 16 | 17 | 16 | 19 | 1.289956249 | 0% (0.085) |
| A8K2T7_HUMAN (+4) | RT35_HUMAN   | MRPS35   | P82673 | 28S ribosomal protein S35, mitochondrial (MRP-S35) (S35mt) (28S ribosomal protein S28, mitochondrial) (MRP-S28) (S28mt)                                                                                                                                                                                             | 37 kDa  | 0.098 | 25  | 12 | 14 | 5  | 2  | 2  | 3  | 5  | 2  | 2  | 5  | 1.288665313 | 0% (0.31)  |

|                   |              |           |        |                                                                                                                                                                                                                                                                        |         |        |     |     |     |    |    |    |    |    |    |    |    |             |             |
|-------------------|--------------|-----------|--------|------------------------------------------------------------------------------------------------------------------------------------------------------------------------------------------------------------------------------------------------------------------------|---------|--------|-----|-----|-----|----|----|----|----|----|----|----|----|-------------|-------------|
| G3V2S9_HUMAN      | RINI_HUMAN   | RNH1      | P13489 | Ribonuclease inhibitor (Placental ribonuclease inhibitor) (Placental RNase inhibitor) (Ribonuclease/angiogenin inhibitor 1) (RAI)                                                                                                                                      | 50 kDa  | 0.51   | 26  | 12  | 14  | 1  | 6  | 4  | 1  | 4  | 4  | 4  | 2  | 1.288665313 | 0% (0.31)   |
| A8K787_HUMAN (+1) | Q59GW8_HUMAN |           | Q59GW8 | Succinate dehydrogenase complex, subunit A, flavoprotein variant (Fragment)                                                                                                                                                                                            | 73 kDa  | 0.61   | 127 | 59  | 68  | 10 | 18 | 19 | 12 | 35 | 6  | 13 | 14 | 1.287134928 | 0% (0.085)  |
| B2R673_HUMAN (+2) | Q32Q12_HUMAN | NME1-NME2 | Q32Q12 | Nucleoside diphosphate kinase (EC 2.7.4.6)                                                                                                                                                                                                                             | 33 kDa  | 0.17   | 85  | 39  | 45  | 9  | 9  | 11 | 11 | 13 | 9  | 13 | 10 | 1.286693379 | 0% (0.14)   |
| PTCD3_HUMAN       | MRRP1_HUMAN  | TRMT10C   | Q7L0Y3 | Mitochondrial ribonuclease P protein 1 (Mitochondrial RNase P protein 1) (EC 2.1.1.-) (HBV pre-S2 trans-regulated protein 2) (RNA (guanine-9)-methyltransferase domain-containing protein 1) (Renal carcinoma antigen NY-REN-49) (tRNA methyltransferase 10 homolog C) | 47 kDa  | 0.18   | 42  | 19  | 22  | 5  | 4  | 4  | 6  | 7  | 3  | 4  | 8  | 1.285567921 | 0% (0.25)   |
| B3KUZ7_HUMAN (+3) | Q9BR63_HUMAN | FARSB     | Q9BR63 | FARSB protein (Fragment)                                                                                                                                                                                                                                               | 66 kDa  | 0.15   | 56  | 26  | 30  | 1  | 9  | 8  | 8  | 14 | 9  | 7  | 0  | 1.284078393 | 0% (0.20)   |
| B3KY04_HUMAN (+1) | DDX21_HUMAN  | DDX21     | Q9NR30 | Nucleolar RNA helicase 2 (EC 3.6.4.13) (DEAD box protein 21) (Gu-alpha) (Nucleolar RNA helicase Gu) (Nucleolar RNA helicase II) (RH II/Gu)                                                                                                                             | 87 kDa  | 0.19   | 70  | 33  | 38  | 3  | 8  | 12 | 9  | 7  | 9  | 19 | 3  | 1.283210891 | 0% (0.17)   |
| SPB6_HUMAN        | Q567R6_HUMAN | SSBP1     | Q567R6 | Single-stranded DNA-binding protein                                                                                                                                                                                                                                    | 17 kDa  | 0.34   | 86  | 40  | 46  | 13 | 7  | 6  | 14 | 21 | 5  | 6  | 14 | 1.28264875  | 0% (0.14)   |
| B2R806_HUMAN (+2) | STT3A_HUMAN  | STT3A     | P46977 | Dolichyl-diphosphooligosaccharide--protein glycosyltransferase subunit STT3A (Oligosaccharyl transferase subunit STT3A) (STT3-A) (EC 2.4.99.18) (B5) (Integral membrane protein 1) (Transmembrane protein TMC)                                                         | 81 kDa  | 0.19   | 145 | 68  | 78  | 25 | 20 | 15 | 7  | 19 | 27 | 12 | 21 | 1.281601835 | 0% (0.073)  |
| B4DSN3_HUMAN (+2) | B2RWP9_HUMAN | MYH10     | B2RWP9 | MYH10 protein                                                                                                                                                                                                                                                          | 230 kDa | 0.11   | 193 | 90  | 103 | 29 | 19 | 14 | 29 | 23 | 16 | 48 | 16 | 1.27952955  | 95% (0.046) |
| BAIP2_HUMAN       | EFTU_HUMAN   | TUFM      | P49411 | Elongation factor Tu, mitochondrial (EF-Tu) (P43)                                                                                                                                                                                                                      | 50 kDa  | 0.18   | 241 | 112 | 128 | 27 | 29 | 29 | 31 | 45 | 11 | 30 | 42 | 1.278300606 | 95% (0.030) |
| B4DPD5_HUMAN (+3) | TEX10_HUMAN  | TEX10     | Q9NXF1 | Testis-expressed sequence 10 protein                                                                                                                                                                                                                                   | 106 kDa | 0.23   | 58  | 27  | 31  | 11 | 2  | 2  | 12 | 11 | 6  | 4  | 11 | 1.278262235 | 0% (0.20)   |
| J9JIE6_HUMAN      | SMU1_HUMAN   | SMU1      | Q2TAY7 | WD40 repeat-containing protein SMU1 (Smu-1 suppressor of mec-8 and unc-52 protein homolog) [Cleaved into: WD40 repeat-containing protein SMU1, N-terminally processed]                                                                                                 | 58 kDa  | 0.17   | 43  | 20  | 23  | 2  | 7  | 7  | 4  | 6  | 1  | 8  | 8  | 1.277763781 | 0% (0.24)   |
| MUC16_HUMAN       | MTA2_HUMAN   | MTA2      | O94776 | Metastasis-associated protein MTA2 (Metastasis-associated 1-like 1) (MTA1-L1 protein) (p53 target protein in deacetylase complex)                                                                                                                                      | 75 kDa  | 0.0043 | 29  | 13  | 15  | 4  | 5  | 4  | 4  | 4  | 1  | 8  | 4  | 1.276807256 | 0% (0.31)   |
| B3KNK5_HUMAN (+1) | B3KMC9_HUMAN |           | B3KMC9 | cDNA FLJ10711 fis, clone NT2RP3000917, highly similar to 5'-3' exoribonuclease 2 (EC 3.1.11.-)                                                                                                                                                                         | 109 kDa | 0.12   | 27  | 13  | 15  | 1  | 4  | 6  | 2  | 6  | 0  | 6  | 2  | 1.276807256 | 0% (0.31)   |
| TOPI_HUMAN        | NDUAA_HUMAN  | NDUFA10   | O95299 | NADH dehydrogenase [ubiquinone] 1 alpha subcomplex subunit 10, mitochondrial (Complex I-42kD) (CI-42kD) (NADH-ubiquinone oxidoreductase 42 kDa subunit)                                                                                                                | 41 kDa  | 0.14   | 28  | 13  | 15  | 6  | 2  | 2  | 3  | 6  | 1  | 4  | 4  | 1.276807256 | 0% (0.31)   |
| RPR1B_HUMAN       | SPRE_HUMAN   | SPR       | P35270 | Septaplerin reductase (SPR) (EC 1.1.1.153)                                                                                                                                                                                                                             | 28 kDa  | 0.23   | 28  | 13  | 15  | 3  | 4  | 5  | 1  | 2  | 8  | 2  | 3  | 1.276807256 | 0% (0.31)   |
| B2R7T8_HUMAN      | RL35A_HUMAN  | RPL35A    | P18077 | 60S ribosomal protein L35a (Cell growth-inhibiting gene 33 protein)                                                                                                                                                                                                    | 13 kDa  | 0.3    | 13  | 6   | 7   | 2  | 1  | 2  | 1  | 1  | 3  | 1  | 2  | 1.274065809 | 0% (0.41)   |
| ERG7_HUMAN        | NOL11_HUMAN  | NOL11     | Q9H8H0 | Nucleolar protein 11                                                                                                                                                                                                                                                   | 81 kDa  | 0.21   | 13  | 6   | 7   | 1  | 3  | 1  | 1  | 3  | 1  | 2  | 1  | 1.274065809 | 0% (0.41)   |
| RS25_HUMAN        | ITPA_HUMAN   | ITPA      | Q9BY32 | Inosine triphosphate pyrophosphatase (ITPase)                                                                                                                                                                                                                          | 21 kDa  | 0.26   | 13  | 6   | 7   | 0  | 0  | 0  | 6  | 6  | 1  | 0  | 0  | 1.274065809 | 0% (0.41)   |

|                   |              |            |        |                                                                                                                                                                                                                                                                                                                                                                                                                        |         |       |     |     |     |    |    |    |    |    |    |    |    |             |             |
|-------------------|--------------|------------|--------|------------------------------------------------------------------------------------------------------------------------------------------------------------------------------------------------------------------------------------------------------------------------------------------------------------------------------------------------------------------------------------------------------------------------|---------|-------|-----|-----|-----|----|----|----|----|----|----|----|----|-------------|-------------|
|                   |              |            |        | (Inosine triphosphatase) (EC 3.6.1.19) (Non-canonical purine NTP pyrophosphatase) (Non-standard purine NTP pyrophosphatase) (Nucleoside-triphosphate diphosphatase) (Nucleoside-triphosphate pyrophosphatase) (NTPase) (Putative oncogene protein hlc14-06-p)                                                                                                                                                          |         |       |     |     |     |    |    |    |    |    |    |    |    |             |             |
| RL36_HUMAN        | B3KX82_HUMAN |            | B3KX82 | cDNA FLJ44964 fis, clone BRAWH2016209, highly similar to Homo sapiens synovial apoptosis inhibitor 1, synoviolin (SYVN1), transcript variant 2, mRNA                                                                                                                                                                                                                                                                   | 70 kDa  | 0.3   | 13  | 6   | 7   | 1  | 0  | 1  | 4  | 2  | 0  | 2  | 3  | 1.274065809 | 0% (0.41)   |
| S10A4_HUMAN       | PFD2_HUMAN   | PFDN2      | Q9UHV9 | Prefoldin subunit 2                                                                                                                                                                                                                                                                                                                                                                                                    | 17 kDa  | 0.36  | 13  | 6   | 7   | 0  | 2  | 3  | 1  | 3  | 2  | 2  | 0  | 1.274065809 | 0% (0.41)   |
| B7ZL00_HUMAN (+2) | G45IP_HUMAN  | GADD45GIP1 | Q8TAE8 | Growth arrest and DNA damage-inducible protein-interacting protein 1 (39S ribosomal protein L59, mitochondrial) (MRP-L59) (CKII beta-associating protein) (CR6-interacting factor 1) (CRIF1) (Papillomavirus L2-interacting nuclear protein 1) (PLINP) (PLINP-1) (p53-responsive gene 6 protein)                                                                                                                       | 25 kDa  | 0.11  | 13  | 6   | 7   | 5  | 1  | 0  | 0  | 2  | 0  | 2  | 3  | 1.274065809 | 0% (0.41)   |
| E7EUY3_HUMAN      | RS8_HUMAN    | RPS8       | P62241 | 40S ribosomal protein S8                                                                                                                                                                                                                                                                                                                                                                                               | 24 kDa  | 0.23  | 107 | 50  | 57  | 12 | 13 | 14 | 13 | 16 | 18 | 14 | 9  | 1.272755205 | 0% (0.12)   |
| LAMC1_HUMAN       | DHX30_HUMAN  | DHX30      | Q7L2E3 | Putative ATP-dependent RNA helicase DHX30 (EC 3.6.4.13) (DEAH box protein 30)                                                                                                                                                                                                                                                                                                                                          | 134 kDa | 0.065 | 43  | 21  | 24  | 10 | 6  | 3  | 3  | 11 | 3  | 5  | 3  | 1.270661292 | 0% (0.24)   |
| RL3_HUMAN         | SCPDL_HUMAN  | SCCPDH     | Q8NBX0 | Saccharopine dehydrogenase-like oxidoreductase (EC 1.-.-.-)                                                                                                                                                                                                                                                                                                                                                            | 47 kDa  | 0.19  | 45  | 21  | 24  | 14 | 1  | 0  | 6  | 2  | 6  | 6  | 10 | 1.270661292 | 0% (0.24)   |
| K7ELQ9_HUMAN (+1) | LRP1_HUMAN   | LRP1       | Q07954 | Prolow-density lipoprotein receptor-related protein 1 (LRP-1) (Alpha-2-macroglobulin receptor) (A2MR) (Apolipoprotein E receptor) (APOER) (CD antigen CD91) [Cleaved into: Low-density lipoprotein receptor-related protein 1 85 kDa subunit (LRP-85); Low-density lipoprotein receptor-related protein 1 515 kDa subunit (LRP-515); Low-density lipoprotein receptor-related protein 1 intracellular domain (LRP1CD)] | 505 kDa | 0.31  | 77  | 36  | 41  | 6  | 13 | 15 | 2  | 0  | 3  | 12 | 26 | 1.27005168  | 0% (0.17)   |
| ARL8A_HUMAN (+1)  | LDHB_HUMAN   | LDHB       | P07195 | L-lactate dehydrogenase B chain (LDH-B) (EC 1.1.1.27) (LDH heart subunit) (LDH-H) (Renal carcinoma antigen NY-REN-46)                                                                                                                                                                                                                                                                                                  | 37 kDa  | 0.46  | 107 | 51  | 58  | 6  | 14 | 8  | 22 | 19 | 15 | 14 | 11 | 1.269829905 | 0% (0.12)   |
| PSME1_HUMAN (+1)  | ESYT1_HUMAN  | ESYT1      | Q9BSJ8 | Extended synaptotagmin-1 (E-Syt1) (Membrane-bound C2 domain-containing protein)                                                                                                                                                                                                                                                                                                                                        | 123 kDa | 0.35  | 252 | 119 | 135 | 45 | 30 | 28 | 17 | 32 | 21 | 40 | 43 | 1.269102724 | 95% (0.030) |
| B3KMX0_HUMAN (+1) | OAT_HUMAN    | OAT        | P04181 | Ornithine aminotransferase, mitochondrial (EC 2.6.1.13) (Ornithine delta-aminotransferase) (Ornithine-oxo-acid aminotransferase) [Cleaved into: Ornithine aminotransferase, hepatic form; Ornithine aminotransferase, renal form]                                                                                                                                                                                      | 49 kDa  | 0.2   | 94  | 44  | 50  | 13 | 10 | 8  | 13 | 12 | 19 | 6  | 13 | 1.26825868  | 0% (0.14)   |
| B4DLA6_HUMAN (+4) | Q59GM9_HUMAN |            | Q59GM9 | Phosphorylase (EC 2.4.1.1) (Fragment)                                                                                                                                                                                                                                                                                                                                                                                  | 99 kDa  | 0.43  | 62  | 29  | 33  | 8  | 3  | 5  | 12 | 6  | 23 | 4  | 0  | 1.267783878 | 0% (0.20)   |
| STXB3_HUMAN       | B7ZM99_HUMAN | MTHFD1L    | B7ZM99 | MTHFD1L protein (Methylenetetrahydrofolate dehydrogenase (NADP+-dependent) 1-like)                                                                                                                                                                                                                                                                                                                                     | 106 kDa | 0.11  | 62  | 29  | 33  | 14 | 4  | 7  | 4  | 12 | 6  | 4  | 11 | 1.267783878 | 0% (0.20)   |
| Q5QPL9_HUMAN      | TOP2B_HUMAN  | TOP2B      | Q02880 | DNA topoisomerase 2-beta (EC 5.99.1.3) (DNA topoisomerase II, beta isozyme)                                                                                                                                                                                                                                                                                                                                            | 183 kDa | 0.2   | 111 | 52  | 59  | 12 | 15 | 13 | 12 | 24 | 15 | 8  | 12 | 1.26701454  | 0% (0.12)   |



|                   |              |         |        |                                                                                                                                                                                                                                                                                        |         |       |     |     |     |    |    |    |    |    |    |    |    |             |             |
|-------------------|--------------|---------|--------|----------------------------------------------------------------------------------------------------------------------------------------------------------------------------------------------------------------------------------------------------------------------------------------|---------|-------|-----|-----|-----|----|----|----|----|----|----|----|----|-------------|-------------|
| MBOA7_HUMAN       | AAAAT_HUMAN  | SLC1A5  | Q15758 | Neutral amino acid transporter B(0) (ATB(0)) (Baboon M7 virus receptor) (RD114/simian type D retrovirus receptor) (Sodium-dependent neutral amino acid transporter type 2) (Solute carrier family 1 member 5)                                                                          | 57 kDa  | 0.13  | 30  | 14  | 16  | 3  | 3  | 5  | 3  | 3  | 4  | 6  | 3  | 1.26650458  | 0% (0.31)   |
| J3KQU9_HUMAN      | CLPP_HUMAN   | CLPP    | Q16740 | Putative ATP-dependent Clp protease proteolytic subunit, mitochondrial (EC 3.4.21.92) (Endopeptidase Clp)                                                                                                                                                                              | 30 kDa  | 0.082 | 30  | 14  | 16  | 4  | 4  | 2  | 4  | 7  | 3  | 3  | 3  | 1.26650458  | 0% (0.31)   |
| A4D2P0_HUMAN (+1) | A8K766_HUMAN |         | A8K766 | cDNA FLJ77343, highly similar to Homo sapiens electron-transfer-flavoprotein, beta polypeptide(ETFB), mRNA                                                                                                                                                                             | 28 kDa  | 0.18  | 162 | 76  | 86  | 21 | 21 | 13 | 22 | 27 | 22 | 17 | 19 | 1.26487015  | 0% (0.073)  |
| B4DG42_HUMAN (+4) | F8W6I7_HUMAN | HNRNPA1 | F8W6I7 | Heterogeneous nuclear ribonucleoprotein A1                                                                                                                                                                                                                                             | 34 kDa  | 0.098 | 298 | 141 | 159 | 11 | 39 | 44 | 48 | 48 | 22 | 58 | 31 | 1.261881005 | 95% (0.023) |
| B7Z7X8_HUMAN      | ABCD3_HUMAN  | ABCD3   | P28288 | ATP-binding cassette sub-family D member 3 (70 kDa peroxisomal membrane protein) (PMP70)                                                                                                                                                                                               | 75 kDa  | 0.076 | 117 | 54  | 61  | 21 | 9  | 9  | 16 | 12 | 24 | 11 | 16 | 1.261689739 | 0% (0.12)   |
| RAB8A_HUMAN       | RUVB2_HUMAN  | RUVBL2  | Q9Y230 | RuvB-like 2 (EC 3.6.4.12) (48 kDa TATA box-binding protein-interacting protein) (48 kDa TBP-interacting protein) (51 kDa erythrocyte cytosolic protein) (ECP-51) (IN080 complex subunit J) (Repressing pontin 52) (Reptin 52) (TIP49b) (TIP60-associated protein 54-beta) (TAP54-beta) | 51 kDa  | 0.36  | 149 | 70  | 79  | 11 | 16 | 22 | 22 | 20 | 30 | 17 | 13 | 1.261330462 | 0% (0.085)  |
| GCDH_HUMAN        | AGK_HUMAN    | AGK     | Q53H12 | Acylglycerol kinase, mitochondrial (hAGK) (EC 2.7.1.107) (EC 2.7.1.94) (Multiple substrate lipid kinase) (HsMuLK) (MuLK) (Multi-substrate lipid kinase)                                                                                                                                | 47 kDa  | 0.16  | 32  | 15  | 17  | 4  | 4  | 1  | 6  | 6  | 0  | 1  | 8  | 1.257470137 | 0% (0.30)   |
| F5H569_HUMAN (+2) | H3BN02_HUMAN | ITGAX   | H3BN02 | Integrin alpha-X                                                                                                                                                                                                                                                                       | 129 kDa | 0.14  | 32  | 15  | 17  | 3  | 5  | 7  | 0  | 0  | 0  | 4  | 13 | 1.257470137 | 0% (0.30)   |
| Q8N7G1_HUMAN      | PLOD3_HUMAN  | PLOD3   | O60568 | Procollagen-lysine,2-oxoglutarate 5-dioxygenase 3 (EC 1.14.11.4) (Lysyl hydroxylase 3) (LH3)                                                                                                                                                                                           | 85 kDa  | 0.31  | 84  | 40  | 45  | 11 | 14 | 11 | 3  | 15 | 6  | 12 | 15 | 1.255484673 | 0% (0.16)   |
| UBP5_HUMAN        | B4DKN9_HUMAN |         | B4DKN9 | cDNA FLJ57740, highly similar to Transforming protein RhoA                                                                                                                                                                                                                             | 20 kDa  | 0.14  | 85  | 40  | 45  | 7  | 8  | 11 | 14 | 9  | 22 | 10 | 4  | 1.255484673 | 0% (0.16)   |
| F8VQX6_HUMAN (+2) | RISC_HUMAN   | SCPEP1  | Q9HB40 | Retinoid-inducible serine carboxypeptidase (EC 3.4.16.-) (Serine carboxypeptidase 1)                                                                                                                                                                                                   | 51 kDa  | 0.23  | 16  | 7   | 8   | 0  | 3  | 4  | 0  | 2  | 0  | 4  | 2  | 1.255348682 | 0% (0.41)   |
| AMRP_HUMAN (+1)   | QCR7_HUMAN   | UQCRB   | P14927 | Cytochrome b-c1 complex subunit 7 (Complex III subunit 7) (Complex III subunit VII) (QP-C) (Ubiquinol-cytochrome c reductase complex 14 kDa protein)                                                                                                                                   | 14 kDa  | 0.18  | 16  | 7   | 8   | 3  | 1  | 1  | 2  | 2  | 1  | 1  | 4  | 1.255348682 | 0% (0.41)   |
| B4DDT3_HUMAN (+1) | A8K6F0_HUMAN |         | A8K6F0 | cDNA FLJ75449, highly similar to Homo sapiens aquarius homolog (mouse) (AQR), mRNA                                                                                                                                                                                                     | 171 kDa | 0.21  | 14  | 7   | 8   | 3  | 1  | 1  | 2  | 2  | 0  | 4  | 1  | 1.255348682 | 0% (0.41)   |
| LRBA_HUMAN        | AMPB_HUMAN   | RNPEP   | Q9H4A4 | Aminopeptidase B (AP-B) (EC 3.4.11.6) (Arginine aminopeptidase) (Arginyl aminopeptidase)                                                                                                                                                                                               | 73 kDa  | 0.046 | 15  | 7   | 8   | 0  | 2  | 2  | 3  | 2  | 5  | 0  | 1  | 1.255348682 | 0% (0.41)   |
| PARP9_HUMAN       | B3KQF4_HUMAN |         | B3KQF4 | cDNA FLJ90373 fic, clone NT2RP2004606, highly similar to Metalloproteinase inhibitor 1                                                                                                                                                                                                 | 23 kDa  | 0.096 | 15  | 7   | 8   | 0  | 5  | 2  | 0  | 0  | 3  | 2  | 3  | 1.255348682 | 0% (0.41)   |
| ACATN_HUMAN       | LBR_HUMAN    | LBR     | Q14739 | Lamin-B receptor (Integral nuclear envelope inner membrane protein) (LMN2R)                                                                                                                                                                                                            | 71 kDa  | 0.11  | 15  | 7   | 8   | 2  | 1  | 2  | 2  | 0  | 4  | 2  | 2  | 1.255348682 | 0% (0.41)   |
| FKB10_HUMAN       | A8K2X4_HUMAN |         | A8K2X4 | cDNA FLJ75401, highly similar to Homo sapiens endoglin (Osler-Rendu-Weber syndrome 1), mRNA                                                                                                                                                                                            | 71 kDa  | 0.2   | 15  | 7   | 8   | 2  | 1  | 4  | 0  | 0  | 3  | 3  | 2  | 1.255348682 | 0% (0.41)   |
| ASNA_HUMAN        | D6REA1_HUMAN | SIL1    | D6REA1 | Nucleotide exchange factor SIL1                                                                                                                                                                                                                                                        | 53 kDa  | 0.13  | 15  | 7   | 8   | 1  | 3  | 2  | 1  | 1  | 1  | 3  | 3  | 1.255348682 | 0% (0.41)   |

|                   |              |        |        |                                                                                                                                                                                                                                                                                                                                                          |         |       |     |     |     |    |    |    |    |    |    |    |    |                 |                 |
|-------------------|--------------|--------|--------|----------------------------------------------------------------------------------------------------------------------------------------------------------------------------------------------------------------------------------------------------------------------------------------------------------------------------------------------------------|---------|-------|-----|-----|-----|----|----|----|----|----|----|----|----|-----------------|-----------------|
| BAZ1B_HUMAN       | B2R6P4_HUMAN |        | B2R6P4 | cDNA, FLJ93048, highly similar to Homo sapiens synaptobrevin-like 1 (SYBL1), mRNA                                                                                                                                                                                                                                                                        | 25 kDa  | 0.11  | 15  | 7   | 8   | 0  | 3  | 2  | 2  | 2  | 0  | 1  | 5  | 1.2553486<br>82 | 0%<br>(0.41)    |
| B0YJ32_HUMAN (+1) | NQO1_HUMAN   | NQO1   | P15559 | NAD(P)H dehydrogenase [quinone] 1 (EC 1.6.5.2) (Azoreductase) (DT-diaphorase) (DTD) (Menadiene reductase) (NAD(P)H:quinone oxidoreductase 1) (Phylloquinone reductase) (Quinone reductase 1) (QR1)                                                                                                                                                       | 31 kDa  | 0.032 | 15  | 7   | 8   | 0  | 0  | 1  | 6  | 6  | 0  | 2  | 0  | 1.2553486<br>82 | 0%<br>(0.41)    |
| E7ENA9_HUMAN (+1) | Q53GN4_HUMAN | WDR1   | Q53GN4 | WD repeat domain 1, isoform CRA_a (WD repeat-containing protein 1 isoform 1 variant) (Fragment)                                                                                                                                                                                                                                                          | 66 kDa  | 0.11  | 51  | 24  | 27  | 4  | 9  | 6  | 5  | 4  | 9  | 9  | 5  | 1.2527300<br>84 | 0%<br>(0.24)    |
| B4E206_HUMAN (+2) | TBB2B_HUMAN  | TUBB2B | Q9BVA1 | Tubulin beta-2B chain                                                                                                                                                                                                                                                                                                                                    | 50 kDa  | 0.11  | 484 | 230 | 257 | 71 | 58 | 51 | 52 | 67 | 73 | 54 | 61 | 1.2512598<br>21 | 95%<br>(0.0066) |
| ROA0_HUMAN        | B4DLW8_HUMAN | DDX5   | B4DLW8 | Probable ATP-dependent RNA helicase DDX5 (cDNA FLJ59339, highly similar to Probable ATP-dependent RNA helicase DDX5 (EC 3.6.1.-))                                                                                                                                                                                                                        | 61 kDa  | 0.13  | 161 | 76  | 85  | 17 | 21 | 19 | 20 | 21 | 15 | 32 | 17 | 1.2503550<br>28 | 0%<br>(0.084)   |
| OCAD2_HUMAN       | ANXA7_HUMAN  | ANXA7  | P20073 | Annexin A7 (Annexin VII) (Annexin-7) (Synexin)                                                                                                                                                                                                                                                                                                           | 53 kDa  | 0.41  | 88  | 42  | 47  | 14 | 8  | 10 | 11 | 7  | 17 | 12 | 11 | 1.2492120<br>77 | 0%<br>(0.16)    |
| B4DTES_HUMAN (+3) | E9PKU7_HUMAN | GANAB  | E9PKU7 | Neutral alpha-glucosidase AB                                                                                                                                                                                                                                                                                                                             | 97 kDa  | 0.1   | 366 | 174 | 194 | 42 | 56 | 45 | 32 | 35 | 43 | 51 | 0  | 1.2480740<br>57 | 95%<br>(0.017)  |
| PX11B_HUMAN       | B4DJ38_HUMAN |        | B4DJ38 | cDNA FLJ56092, highly similar to Pentatricopeptide repeat protein 1                                                                                                                                                                                                                                                                                      | 84 kDa  | 0.21  | 53  | 25  | 28  | 8  | 5  | 5  | 9  | 10 | 8  | 5  | 6  | 1.2476640<br>69 | 0%<br>(0.24)    |
| Q6URC4_HUMAN      | LAMC1_HUMAN  | LAMC1  | P11047 | Laminin subunit gamma-1 (Laminin B2 chain) (Laminin-1 subunit gamma) (Laminin-10 subunit gamma) (Laminin-11 subunit gamma) (Laminin-2 subunit gamma) (Laminin-3 subunit gamma) (Laminin-4 subunit gamma) (Laminin-6 subunit gamma) (Laminin-7 subunit gamma) (Laminin-8 subunit gamma) (Laminin-9 subunit gamma) (S-laminin subunit gamma) (S-LAM gamma) | 178 kDa | 0.086 | 36  | 17  | 19  | 0  | 8  | 8  | 1  | 6  | 2  | 4  | 7  | 1.2423720<br>46 | 0%<br>(0.30)    |
| DAD1_HUMAN (+1)   | ANXA3_HUMAN  | ANXA3  | P12429 | Annexin A3 (35-alpha calcimedlin) (Annexin III) (Annexin-3) (Inositol 1,2-cyclic phosphate 2-phosphohydrolase) (Lipocortin III) (Placental anticoagulant protein III) (PAP-III)                                                                                                                                                                          | 36 kDa  | 0.28  | 117 | 54  | 60  | 27 | 1  | 4  | 22 | 17 | 8  | 14 | 21 | 1.2414037<br>58 | 0%<br>(0.14)    |
| RT09_HUMAN        | SRPRB_HUMAN  | SRPRB  | Q9Y5M8 | Signal recognition particle receptor subunit beta (SR-beta) (Protein APMCF1)                                                                                                                                                                                                                                                                             | 30 kDa  | 0.22  | 113 | 54  | 60  | 16 | 12 | 13 | 13 | 19 | 17 | 13 | 12 | 1.2414037<br>58 | 0%<br>(0.14)    |
| MOT4_HUMAN        | RM47_HUMAN   | MRPL47 | Q9HD33 | 39S ribosomal protein L47, mitochondrial (L47mt) (MRP-L47) (Nasopharyngeal carcinoma metastasis-related protein 1)                                                                                                                                                                                                                                       | 29 kDa  | 0.088 | 17  | 8   | 9   | 3  | 2  | 2  | 1  | 3  | 1  | 1  | 4  | 1.2406788<br>73 | 0%<br>(0.40)    |
| B2RAR6_HUMAN (+1) | B2R6X2_HUMAN |        | B2R6X2 | cDNA, FLJ193161, highly similar to Homo sapiens glucuronidase, beta (GUSB), mRNA                                                                                                                                                                                                                                                                         | 75 kDa  | 0.082 | 17  | 8   | 9   | 2  | 2  | 3  | 1  | 1  | 0  | 3  | 5  | 1.2406788<br>73 | 0%<br>(0.40)    |
| ALG5_HUMAN (+1)   | SIN3A_HUMAN  | SIN3A  | Q96ST3 | Paired amphipathic helix protein Sin3a (Histone deacetylase complex subunit Sin3a) (Transcriptional corepressor Sin3a)                                                                                                                                                                                                                                   | 145 kDa | 0.27  | 17  | 8   | 9   | 1  | 1  | 1  | 5  | 1  | 1  | 5  | 2  | 1.2406788<br>73 | 0%<br>(0.40)    |
| A8K8G0_HUMAN (+2) | DEST_HUMAN   | DSTN   | P60981 | Destrin (Actin-depolymerizing factor) (ADF)                                                                                                                                                                                                                                                                                                              | 19 kDa  | 0.25  | 19  | 8   | 9   | 1  | 2  | 3  | 2  | 2  | 4  | 2  | 2  | 1.2406788<br>73 | 0%<br>(0.40)    |
| VIGLN_HUMAN       | K6PF_HUMAN   | PFKM   | P08237 | 6-phosphofructokinase, muscle type (EC 2.7.1.11) (Phosphofructo-1-kinase isozyme A) (PFK-A) (Phosphofructokinase-M) (Phosphofructokinase 1) (Phosphohexokinase)                                                                                                                                                                                          | 85 kDa  | 0.12  | 17  | 8   | 9   | 1  | 5  | 1  | 0  | 2  | 5  | 2  | 0  | 1.2406788<br>73 | 0%<br>(0.40)    |

|                   |              |         |        |                                                                                                                                                                                                                                                                                                                                                                                                              |         |       |     |     |     |    |    |    |    |    |    |    |    |             |              |
|-------------------|--------------|---------|--------|--------------------------------------------------------------------------------------------------------------------------------------------------------------------------------------------------------------------------------------------------------------------------------------------------------------------------------------------------------------------------------------------------------------|---------|-------|-----|-----|-----|----|----|----|----|----|----|----|----|-------------|--------------|
| PGRC2_HUMAN       | RL7_HUMAN    | RPL7    | P18124 | 60S ribosomal protein L7                                                                                                                                                                                                                                                                                                                                                                                     | 29 kDa  | 0.22  | 116 | 55  | 61  | 13 | 9  | 14 | 20 | 12 | 19 | 11 | 18 | 1.239243766 | 0% (0.14)    |
| ERMPI_HUMAN       | Q53EP4_HUMAN |         | Q53EP4 | Ribophorin I variant (Fragment)                                                                                                                                                                                                                                                                                                                                                                              | 69 kDa  | 0.13  | 297 | 142 | 157 | 48 | 35 | 32 | 28 | 40 | 34 | 39 | 44 | 1.237381488 | 95% (0.034)  |
| Q9BQQ5_HUMAN      | K7ELQ9_HUMAN | TMEM205 | K7ELQ9 | Transmembrane protein 205 (Fragment)                                                                                                                                                                                                                                                                                                                                                                         | 19 kDa  | 0.43  | 38  | 18  | 20  | 6  | 4  | 0  | 8  | 2  | 7  | 3  | 8  | 1.235999744 | 0% (0.30)    |
| H2B1B_HUMAN (+3)  | B4E206_HUMAN |         | B4E206 | cDNA FLJ55441, highly similar to Nuclear pore complex protein Nup133                                                                                                                                                                                                                                                                                                                                         | 127 kDa | 0.61  | 37  | 18  | 20  | 3  | 5  | 3  | 7  | 7  | 1  | 6  | 6  | 1.235999744 | 0% (0.30)    |
| PR40A_HUMAN       | ROA0_HUMAN   | HNRNPA0 | Q13151 | Heterogeneous nuclear ribonucleoprotein A0 (hnRNP A0)                                                                                                                                                                                                                                                                                                                                                        | 31 kDa  | 0.057 | 38  | 18  | 20  | 2  | 6  | 5  | 5  | 7  | 4  | 4  | 5  | 1.235999744 | 0% (0.30)    |
| F162A_HUMAN (+1)  | Q8IWP6_HUMAN |         | Q8IWP6 | Class IVb beta tubulin                                                                                                                                                                                                                                                                                                                                                                                       | 50 kDa  | 0.31  | 574 | 274 | 302 | 81 | 62 | 69 | 64 | 77 | 86 | 71 | 67 | 1.2345206   | 95% (0.0056) |
| Q6FGX3_HUMAN (+1) | B4DJG6_HUMAN |         | B4DJG6 | cDNA FLJ54691, highly similar to Thromboxane-A synthase (EC 5.3.99.5)                                                                                                                                                                                                                                                                                                                                        | 66 kDa  | 0.43  | 102 | 48  | 53  | 8  | 14 | 18 | 9  | 0  | 14 | 11 | 28 | 1.233452665 | 0% (0.16)    |
| K7EPB2_HUMAN      | IF4A3_HUMAN  | EIF4A3  | P38919 | Eukaryotic initiation factor 4A-III (eIF-4A-III) (eIF4A-III) (EC 3.6.4.13) (ATP-dependent RNA helicase DDX48) (ATP-dependent RNA helicase eIF4A-3) (DEAD box protein 48) (Eukaryotic initiation factor 4A-like NUK-34) (Eukaryotic translation initiation factor 4A isoform 3) (Nuclear matrix protein 265) (NMP 265) (hNMP 265) [Cleaved into: Eukaryotic initiation factor 4A-III, N-terminally processed] | 47 kDa  | 0.14  | 126 | 58  | 64  | 10 | 12 | 20 | 16 | 27 | 10 | 14 | 14 | 1.233201608 | 0% (0.14)    |
| PGRC1_HUMAN       | B5BTY4_HUMAN | DDX3X   | B5BTY4 | ATP-dependent RNA helicase DDX3X                                                                                                                                                                                                                                                                                                                                                                             | 73 kDa  | 0.16  | 122 | 58  | 64  | 12 | 18 | 13 | 16 | 19 | 8  | 18 | 19 | 1.233201608 | 0% (0.14)    |
| RAB3D_HUMAN       | PHB2_HUMAN   | PHB2    | Q99623 | Prohibitin-2 (B-cell receptor-associated protein BAP37) (D-prohibitin) (Repressor of estrogen receptor activity)                                                                                                                                                                                                                                                                                             | 33 kDa  | 0.3   | 248 | 118 | 130 | 36 | 20 | 19 | 42 | 27 | 38 | 28 | 37 | 1.232709002 | 0% (0.052)   |
| PP2AA_HUMAN       | B4DZI8_HUMAN | COPB2   | B4DZI8 | Coatamer protein complex, subunit beta 2 (Beta prime), isoform CRA_b (Coatamer subunit beta') (cDNA FLJ56271, highly similar to Coatamer subunit beta)                                                                                                                                                                                                                                                       | 99 kDa  | 0.27  | 61  | 29  | 32  | 6  | 8  | 9  | 6  | 11 | 12 | 6  | 3  | 1.230750579 | 0% (0.24)    |
| AGK_HUMAN (+2)    | ARPC4_HUMAN  | ARPC4   | P59998 | Actin-related protein 2/3 complex subunit 4 (Arp2/3 complex 20 kDa subunit) (p20-ARC)                                                                                                                                                                                                                                                                                                                        | 20 kDa  | 0.2   | 42  | 19  | 21  | 3  | 6  | 5  | 5  | 5  | 7  | 3  | 6  | 1.230256975 | 0% (0.30)    |
| DDX1_HUMAN        | AP3B1_HUMAN  | AP3B1   | O00203 | AP-3 complex subunit beta-1 (Adapter-related protein complex 3 subunit beta-1) (Adaptor protein complex AP-3 subunit beta-1) (Beta-3A-adaptin) (Clathrin assembly protein complex 3 beta-1 large chain)                                                                                                                                                                                                      | 121 kDa | 0.16  | 19  | 9   | 10  | 1  | 2  | 6  | 0  | 1  | 0  | 4  | 5  | 1.228871802 | 0% (0.40)    |
| Q6MZM3_HUMAN (+1) | AL5AP_HUMAN  | ALOX5AP | P20292 | Arachidonate 5-lipoxygenase-activating protein (FLAP) (MK-886-binding protein)                                                                                                                                                                                                                                                                                                                               | 18 kDa  | 0.087 | 19  | 9   | 10  | 1  | 3  | 5  | 0  | 0  | 3  | 2  | 5  | 1.228871802 | 0% (0.40)    |
| B1AVQ5_HUMAN (+2) | MIPEP_HUMAN  | MIPEP   | Q99797 | Mitochondrial intermediate peptidase (MIP) (EC 3.4.24.59)                                                                                                                                                                                                                                                                                                                                                    | 81 kDa  | 0.072 | 19  | 9   | 10  | 7  | 0  | 3  | 0  | 6  | 0  | 1  | 3  | 1.228871802 | 0% (0.40)    |
| CP1B1_HUMAN       | C9JRZ6_HUMAN | CHCHD3  | C9JRZ6 | Coiled-coil-helix-coiled-coil-helix domain-containing protein 3, mitochondrial                                                                                                                                                                                                                                                                                                                               | 27 kDa  | 0.13  | 19  | 9   | 10  | 2  | 1  | 1  | 5  | 5  | 1  | 1  | 3  | 1.228871802 | 0% (0.40)    |
| DPP4_HUMAN        | A8K494_HUMAN |         | A8K494 | cDNA FLJ78440, highly similar to Human lactoferrin                                                                                                                                                                                                                                                                                                                                                           | 78 kDa  | 0.16  | 19  | 9   | 10  | 2  | 2  | 2  | 3  | 3  | 3  | 3  | 1  | 1.228871802 | 0% (0.40)    |
| LYRIC_HUMAN       | B3KP52_HUMAN |         | B3KP52 | cDNA FLJ31171 fis, clone KIDNE2000046, highly similar to 3-mercaptopyruvate sulfurtransferase                                                                                                                                                                                                                                                                                                                | 33 kDa  | 0.11  | 19  | 9   | 10  | 2  | 2  | 2  | 3  | 3  | 4  | 2  | 1  | 1.228871802 | 0% (0.40)    |
| B5MBZ0_HUMAN (+1) | A8K800_HUMAN |         | A8K800 | cDNA FLJ76924, highly similar to Homo sapiens brix domain containing 1 (BXDC1), mRNA                                                                                                                                                                                                                                                                                                                         | 36 kDa  | 0.057 | 19  | 9   | 10  | 1  | 3  | 1  | 4  | 2  | 3  | 3  | 2  | 1.228871802 | 0% (0.40)    |
| A2AB90_HUMAN (+2) | PTPM1_HUMAN  | PTPMT1  | Q8WUK0 | Phosphatidyglycerophosphate and protein-tyrosine phosphatase 1 (EC 3.1.3.27)                                                                                                                                                                                                                                                                                                                                 | 23 kDa  | 0.14  | 19  | 9   | 10  | 3  | 2  | 2  | 2  | 1  | 4  | 3  | 2  | 1.228871802 | 0% (0.40)    |

|                    |              |         |        |                                                                                                                                                                                                                                                                                 |         |       |     |     |     |    |    |    |     |     |    |    |     |             |     |          |
|--------------------|--------------|---------|--------|---------------------------------------------------------------------------------------------------------------------------------------------------------------------------------------------------------------------------------------------------------------------------------|---------|-------|-----|-----|-----|----|----|----|-----|-----|----|----|-----|-------------|-----|----------|
|                    |              |         |        | (PTEN-like phosphatase)<br>(Phosphoinositide lipid phosphatase) (Protein-tyrosine phosphatase mitochondrial 1) (EC 3.1.3.16) (EC 3.1.3.48)                                                                                                                                      |         |       |     |     |     |    |    |    |     |     |    |    |     |             |     |          |
| CS010_HUMAN        | B4DRW3_HUMAN |         | B4DRW3 | cDNA FLJ57180, highly similar to TAR DNA-binding protein 43                                                                                                                                                                                                                     | 35 kDa  | 0.27  | 19  | 9   | 10  | 2  | 2  | 2  | 3   | 2   | 4  | 2  | 2   | 1.228871802 | 0%  | (0.40)   |
| B4DD89_HUMAN(+1)   | B4DED6_HUMAN |         | B4DED6 | cDNA FLJ56545, highly similar to ATP-dependent RNA helicase DDX50 (EC 3.6.1.-)                                                                                                                                                                                                  | 72 kDa  | 0.23  | 19  | 9   | 10  | 0  | 2  | 4  | 2   | 1   | 2  | 6  | 0   | 1.228871802 | 0%  | (0.40)   |
| B4E2X9_HUMAN       | Q58EY4_HUMAN | SMARCC1 | Q58EY4 | SWI/SNF related, matrix associated, actin dependent regulator of chromatin, subfamily c, member 1                                                                                                                                                                               | 123 kDa | 0.1   | 19  | 9   | 10  | 0  | 2  | 2  | 0   | 4   | 0  | 5  | 1   | 1.228871802 | 0%  | (0.40)   |
| EFTS_HUMAN         | AT1A1_HUMAN  | ATP1A1  | P05023 | Sodium/potassium-transporting ATPase subunit alpha-1 (Na(+)/K(+) ATPase alpha-1 subunit) (EC 3.6.3.9) (Sodium pump subunit alpha-1)                                                                                                                                             | 113 kDa | 0.16  | 326 | 156 | 171 | 44 | 44 | 44 | 23  | 42  | 25 | 45 | 59  | 1.226965929 | 95% | (0.033)  |
| B4DH58_HUMAN(+1)   | 1433Z_HUMAN  | YWHAZ   | P63104 | 14-3-3 protein zeta/delta (Protein kinase C inhibitor protein 1) (KCIP-1)                                                                                                                                                                                                       | 28 kDa  | 0.17  | 107 | 51  | 56  | 7  | 13 | 13 | 18  | 20  | 11 | 12 | 13  | 1.226931121 | 0%  | (0.16)   |
| Q860C0_HUMAN       | E9PCY7_HUMAN | HNRNPH1 | E9PCY7 | Heterogeneous nuclear ribonucleoprotein H                                                                                                                                                                                                                                       | 47 kDa  | 0.27  | 178 | 84  | 92  | 22 | 22 | 17 | 22  | 23  | 18 | 27 | 24  | 1.224972344 | 0%  | (0.096)  |
| A8K4K9_HUMAN(+2)   | KAD4_HUMAN   | AK4     | P27144 | Adenylate kinase 4, mitochondrial (AK 4) (EC 2.7.4.10) (EC 2.7.4.6) (Adenylate kinase 3-like) (GTP:AMP phosphotransferase AK4)                                                                                                                                                  | 25 kDa  | 0.23  | 108 | 52  | 57  | 7  | 16 | 21 | 10  | 18  | 15 | 12 | 12  | 1.224920697 | 0%  | (0.16)   |
| A6NEM2_HUMAN(+1)   | AL7A1_HUMAN  | ALDH7A1 | P49419 | Alpha-aminoadipic semialdehyde dehydrogenase (Alpha-AASA dehydrogenase) (EC 1.2.1.31) (Aldehyde dehydrogenase family 7 member A1) (EC 1.2.1.3) (Antiquitin-1) (Betaine aldehyde dehydrogenase) (EC 1.2.1.8) (Delta1-piperidine-6-carboxylate dehydrogenase) (P6c dehydrogenase) | 58 kDa  | 0.034 | 198 | 95  | 104 | 29 | 27 | 19 | 21  | 52  | 14 | 13 | 27  | 1.224635432 | 0%  | (0.081)  |
| Q59GW5_HUMAN(+1)   | PRKDC_HUMAN  | PRKDC   | P78527 | DNA-dependent protein kinase catalytic subunit (DNA-PK catalytic subunit) (DNA-PKcs) (EC 2.7.11.1) (DNPK1) (p460)                                                                                                                                                               | 469 kDa | 0.15  | 470 | 225 | 246 | 21 | 52 | 67 | 86  | 79  | 52 | 93 | 20  | 1.22432195  | 95% | (0.014)  |
| F5GYR8_HUMAN(+2)   | F5H5D3_HUMAN | TUBA1C  | F5H5D3 | Tubulin alpha-1C chain                                                                                                                                                                                                                                                          | 58 kDa  | 0.11  | 437 | 209 | 228 | 61 | 49 | 50 | 50  | 58  | 65 | 55 | 51  | 1.221512613 | 95% | (0.018)  |
| AUPI_HUMAN         | RAB18_HUMAN  | RAB18   | Q9NP72 | Ras-related protein Rab-18                                                                                                                                                                                                                                                      | 23 kDa  | 0.16  | 90  | 43  | 47  | 13 | 10 | 11 | 9   | 3   | 18 | 13 | 13  | 1.2209656   | 0%  | (0.19)   |
| BASL_HUMAN(+1)     | ATPB_HUMAN   | ATP5B   | P06576 | ATP synthase subunit beta, mitochondrial (EC 3.6.3.14)                                                                                                                                                                                                                          | 57 kDa  | 0.21  | 793 | 380 | 414 | 96 | 92 | 91 | 101 | 112 | 90 | 99 | 113 | 1.220770425 | 95% | (0.0023) |
| A0S1I7_HUMAN(+277) | A6NEM2_HUMAN | HCF1    | A6NEM2 | HCF N-terminal chain 5                                                                                                                                                                                                                                                          | 213 kDa | 0.076 | 24  | 10  | 11  | 2  | 3  | 2  | 3   | 2   | 1  | 4  | 4   | 1.219164072 | 0%  | (0.39)   |
| B4DT31_HUMAN(+4)   | B3KNC3_HUMAN |         | B3KNC3 | cDNA FLJ14222 fis, clone NT2RP3003992, highly similar to Nucleolar complex protein 2 homolog                                                                                                                                                                                    | 85 kDa  | 0.15  | 21  | 10  | 11  | 0  | 3  | 2  | 5   | 4   | 3  | 3  | 1   | 1.219164072 | 0%  | (0.39)   |
| SAHH_HUMAN         | RM38_HUMAN   | MRPL38  | Q96DV4 | 39S ribosomal protein L38, mitochondrial (L38mt) (MRP-L38)                                                                                                                                                                                                                      | 45 kDa  | 0.16  | 21  | 10  | 11  | 5  | 2  | 1  | 2   | 5   | 2  | 2  | 2   | 1.219164072 | 0%  | (0.39)   |
| B4DWI8_HUMAN       | F5H315_HUMAN | XAB2    | F5H315 | Pre-mRNA-splicing factor SYF1                                                                                                                                                                                                                                                   | 100 kDa | 0.091 | 21  | 10  | 11  | 4  | 1  | 2  | 3   | 7   | 0  | 3  | 1   | 1.219164072 | 0%  | (0.39)   |
| THEM6_HUMAN        | NDUAC_HUMAN  | NDUFA12 | Q9UI09 | NADH dehydrogenase [ubiquinone] 1 alpha subcomplex subunit 12 (13 kDa differentiation-associated protein) (Complex I-B17.2) (CI-B17.2) (CB17.2) (NADH-ubiquinone oxidoreductase subunit B17.2)                                                                                  | 17 kDa  | 0.25  | 21  | 10  | 11  | 5  | 1  | 2  | 2   | 2   | 2  | 3  | 4   | 1.219164072 | 0%  | (0.39)   |
| J3KT73_HUMAN(+2)   | IDH3B_HUMAN  | IDH3B   | O43837 | Isocitrate dehydrogenase [NAD] subunit beta, mitochondrial (EC 1.1.1.41) (Isocitric dehydrogenase                                                                                                                                                                               | 42 kDa  | 0.39  | 92  | 44  | 48  | 12 | 9  | 7  | 16  | 17  | 8  | 10 | 13  | 1.218730571 | 0%  | (0.19)   |

|                   |              |         |        |                                                                                                                                                                                                            |         |       |     |     |     |    |    |    |    |    |    |    |    |             |             |
|-------------------|--------------|---------|--------|------------------------------------------------------------------------------------------------------------------------------------------------------------------------------------------------------------|---------|-------|-----|-----|-----|----|----|----|----|----|----|----|----|-------------|-------------|
|                   |              |         |        | subunit beta) (NAD(+)-specific ICDH subunit beta)                                                                                                                                                          |         |       |     |     |     |    |    |    |    |    |    |    |    |             |             |
| DEGS1_HUMAN       | ANM1_HUMAN   | PRMT1   | Q99873 | Protein arginine N-methyltransferase 1 (EC 2.1.1.-) (Histone-arginine N-methyltransferase PRMT1) (EC 2.1.1.125) (Interferon receptor 1-bound protein 4)                                                    | 42 kDa  | 0.096 | 68  | 33  | 36  | 12 | 7  | 6  | 8  | 13 | 16 | 6  | 1  | 1.217789295 | 0% (0.23)   |
| RAD21_HUMAN       | IPYR_HUMAN   | PPA1    | Q15181 | Inorganic pyrophosphatase (EC 3.6.1.1) (Pyrophosphate phospho-hydrolase) (PPase)                                                                                                                           | 33 kDa  | 0.15  | 69  | 33  | 36  | 2  | 12 | 2  | 17 | 5  | 15 | 12 | 4  | 1.217789295 | 0% (0.23)   |
| KCY_HUMAN         | F6KPG5_HUMAN |         | F6KPG5 | Albumin (Fragment)                                                                                                                                                                                         | 67 kDa  | 0.34  | 263 | 126 | 137 | 17 | 30 | 37 | 42 | 22 | 40 | 24 | 53 | 1.216819324 | 0% (0.058)  |
| B3KTJ9_HUMAN (+1) | M1RL68_HUMAN | HLA-A   | M1RL68 | MHC class I antigen                                                                                                                                                                                        | 41 kDa  | 0.11  | 119 | 57  | 62  | 10 | 15 | 13 | 19 | 0  | 0  | 0  | 32 | 1.215904874 | 0% (0.16)   |
| ACO13_HUMAN       | NB5R3_HUMAN  | CYB5R3  | P00387 | NADH-cytochrome b5 reductase 3 (B5R) (Cytochrome b5 reductase) (EC 1.6.2.2) (Diaphorase-1) [Cleared into: NADH-cytochrome b5 reductase 3 membrane-bound form; NADH-cytochrome b5 reductase 3 soluble form] | 34 kDa  | 0.38  | 145 | 69  | 75  | 25 | 14 | 14 | 16 | 8  | 22 | 17 | 29 | 1.215465958 | 0% (0.13)   |
| A8K4W7_HUMAN (+2) | TPR_HUMAN    | TPR     | P12270 | Nucleoprotein TPR (Megator) (NPC-associated intranuclear protein) (Translocated promoter region protein)                                                                                                   | 267 kDa | 0.12  | 96  | 46  | 50  | 14 | 10 | 14 | 8  | 8  | 2  | 25 | 16 | 1.214544546 | 0% (0.19)   |
| Q5WOH4_HUMAN (+1) | PDIA4_HUMAN  | PDIA4   | P13667 | Protein disulfide-isomerase A4 (EC 5.3.4.1) (Endoplasmic reticulum resident protein 70) (ER protein 70) (ERp70) (Endoplasmic reticulum resident protein 72) (ER protein 72) (ERp-72) (ERp72)               | 73 kDa  | 0.22  | 293 | 141 | 153 | 27 | 50 | 39 | 25 | 26 | 38 | 41 | 48 | 1.214529225 | 95% (0.030) |
| RALA_HUMAN        | B4DJB4_HUMAN |         | B4DJB4 | cDNA FLJ55931, highly similar to Isocitrate dehydrogenase                                                                                                                                                  | 35 kDa  | 0.3   | 170 | 83  | 90  | 24 | 17 | 23 | 19 | 30 | 13 | 22 | 24 | 1.212908025 | 0% (0.11)   |
| GNA13_HUMAN       | TNPO1_HUMAN  | TNPO1   | Q92973 | Transportin-1 (Importin beta-2) (Karyopherin beta-2) (M9 region interaction protein) (MIP)                                                                                                                 | 102 kDa | 0.18  | 48  | 23  | 25  | 3  | 4  | 7  | 9  | 8  | 7  | 10 | 0  | 1.212023623 | 0% (0.29)   |
| B4DRT4_HUMAN (+1) | Q5XPV6_HUMAN |         | Q5XPV6 | Small nuclear ribonucleoprotein-associated protein                                                                                                                                                         | 24 kDa  | 0.49  | 49  | 23  | 25  | 4  | 6  | 7  | 5  | 6  | 4  | 8  | 7  | 1.212023623 | 0% (0.29)   |
| VTNC_HUMAN        | A8K7F6_HUMAN |         | A8K7F6 | cDNA FLJ78244, highly similar to Homo sapiens eukaryotic translation initiation factor 4A, isoform 1 (EIF4A1), mRNA                                                                                        | 46 kDa  | 0.17  | 176 | 84  | 91  | 10 | 25 | 23 | 26 | 28 | 30 | 26 | 7  | 1.211818456 | 0% (0.11)   |
| C9J9I1_HUMAN (+1) | ETFA_HUMAN   | ETFA    | P13804 | Electron transfer flavoprotein subunit alpha, mitochondrial (Alpha-ETF)                                                                                                                                    | 35 kDa  | 0.078 | 149 | 72  | 78  | 19 | 19 | 18 | 16 | 23 | 17 | 18 | 19 | 1.21155443  | 0% (0.13)   |
| PLPL6_HUMAN       | SYFA_HUMAN   | FARSA   | Q9Y285 | Phenylalanine-tRNA ligase alpha subunit (EC 6.1.1.20) (CML33) (Phenylalanyl-tRNA synthetase alpha subunit) (PheRS)                                                                                         | 58 kDa  | 0.075 | 25  | 11  | 12  | 0  | 4  | 4  | 3  | 7  | 5  | 1  | 0  | 1.211041559 | 0% (0.39)   |
| CO4B_HUMAN (+1)   | PRP19_HUMAN  | PRPF19  | Q9UMS4 | Pre-mRNA-processing factor 19 (Nuclear matrix protein 200) (PRP19/PSO4 homolog) (hPs04) (Senescence evasion factor)                                                                                        | 55 kDa  | 0.1   | 23  | 11  | 12  | 1  | 1  | 5  | 4  | 3  | 3  | 5  | 1  | 1.211041559 | 0% (0.39)   |
| COCA1_HUMAN (+1)  | RER1_HUMAN   | RER1    | O15258 | Protein RER1                                                                                                                                                                                               | 23 kDa  | 0.056 | 23  | 11  | 12  | 2  | 2  | 3  | 4  | 5  | 2  | 1  | 4  | 1.211041559 | 0% (0.39)   |
| ANK1_HUMAN        | MK67L_HUMAN  | NIFK    | Q9BYG3 | MKI67 FHA domain-interacting nucleolar phosphoprotein (Nucleolar phosphoprotein Nopp34) (Nucleolar protein interacting with the FHA domain of pKI-67) (hNIFK)                                              | 34 kDa  | 0.087 | 23  | 11  | 12  | 4  | 1  | 1  | 5  | 4  | 3  | 2  | 3  | 1.211041559 | 0% (0.39)   |
| THIO_HUMAN        | XPP3_HUMAN   | XPNPEP3 | Q9NQH7 | Probable Xaa-Pro aminopeptidase 3 (X-Pro aminopeptidase 3) (EC 3.4.11.9) (Aminopeptidase P3) (APP3)                                                                                                        | 57 kDa  | 0.49  | 24  | 11  | 12  | 2  | 5  | 0  | 3  | 7  | 0  | 3  | 0  | 1.211041559 | 0% (0.39)   |

|                   |              |          |        |                                                                                                                                                                                                                                                                                                                                                                                  |         |       |     |     |     |    |    |    |    |    |    |    |    |             |            |
|-------------------|--------------|----------|--------|----------------------------------------------------------------------------------------------------------------------------------------------------------------------------------------------------------------------------------------------------------------------------------------------------------------------------------------------------------------------------------|---------|-------|-----|-----|-----|----|----|----|----|----|----|----|----|-------------|------------|
| B3KQB4_HUMAN (+2) | ROA3_HUMAN   | HNRNPA3  | P51991 | Heterogeneous nuclear ribonucleoprotein A3 (hnRNP A3)                                                                                                                                                                                                                                                                                                                            | 40 kDa  | 0.22  | 177 | 85  | 92  | 14 | 22 | 20 | 28 | 20 | 8  | 39 | 25 | 1.210754193 | 0% (0.11)  |
| QOR_HUMAN         | E7EX73_HUMAN | EIF4G1   | E7EX73 | Eukaryotic translation initiation factor 4 gamma 1                                                                                                                                                                                                                                                                                                                               | 159 kDa | 0.29  | 75  | 36  | 39  | 3  | 10 | 13 | 10 | 13 | 9  | 14 | 4  | 1.209896062 | 0% (0.23)  |
| A6NJA2_HUMAN (+3) | ASK548_HUMAN |          | A8K548 | cDNA FLJ75008, highly similar to Homo sapiens proline-, glutamic acid-, leucine-rich protein 1 (PELP1), mRNA                                                                                                                                                                                                                                                                     | 120 kDa | 0.2   | 50  | 24  | 26  | 8  | 6  | 3  | 7  | 7  | 5  | 3  | 11 | 1.208368268 | 0% (0.29)  |
| B4DJP7_HUMAN (+1) | DHB4_HUMAN   | HSD17B4  | P51659 | Peroxisomal multifunctional enzyme type 2 (MFE-2) (17-beta-hydroxysteroid dehydrogenase 4) (17-beta-HSD 4) (D-bifunctional protein) (DBP) (Multifunctional protein 2) (MFP-2) [Cleaved into: (3R)-hydroxyacyl-CoA dehydrogenase (EC 1.1.1.112); Enoyl-CoA hydratase 2 (EC 4.2.1.107) (EC 4.2.1.119) (3-alpha,7-alpha,12-alpha-trihydroxy-5-beta-cholest-24-enoyl-CoA hydratase)] | 80 kDa  | 0.16  | 295 | 142 | 153 | 48 | 31 | 41 | 22 | 29 | 43 | 31 | 50 | 1.206035313 | 0% (0.056) |
| B7ZKK7_HUMAN      | B4DUX0_HUMAN | ACOT7    | B4DUX0 | Cytosolic acyl coenzyme A thioester hydrolase (cDNA FLJ61017, highly similar to Cytosolic acyl coenzyme A thioester hydrolase (EC 3.1.2.2))                                                                                                                                                                                                                                      | 30 kDa  | 0.18  | 25  | 12  | 13  | 3  | 3  | 3  | 3  | 11 | 2  | 0  | 0  | 1.204145345 | 0% (0.38)  |
| BLVRB_HUMAN       | HACD2_HUMAN  | PTPLB    | Q6Y1H2 | Very-long-chain (3R)-3-hydroxyacyl-[acyl-carrier protein] dehydratase 2 (EC 4.2.1.134) (3-hydroxyacyl-CoA dehydratase 2) (HACD2) (Protein-tyrosine phosphatase-like member B)                                                                                                                                                                                                    | 28 kDa  | 0.31  | 25  | 12  | 13  | 3  | 5  | 3  | 1  | 4  | 3  | 2  | 4  | 1.204145345 | 0% (0.38)  |
| LAMB3_HUMAN       | UBA6_HUMAN   | UBA6     | A0AVT1 | Ubiquitin-like modifier-activating enzyme 6 (Ubiquitin-activating enzyme 6) (Monocyte protein 4) (MOP-4) (Ubiquitin-activating enzyme E1-like protein 2) (E1-L2)                                                                                                                                                                                                                 | 118 kDa | 0.11  | 25  | 12  | 13  | 0  | 6  | 3  | 3  | 5  | 6  | 2  | 0  | 1.204145345 | 0% (0.38)  |
| SYTM_HUMAN        | HSP72_HUMAN  | HSPA2    | P54652 | Heat shock-related 70 kDa protein 2 (Heat shock 70 kDa protein 2)                                                                                                                                                                                                                                                                                                                | 70 kDa  | 0.14  | 201 | 96  | 103 | 0  | 0  | 0  | 24 | 20 | 28 | 27 | 28 | 1.200494197 | 0% (0.10)  |
| B4DM33_HUMAN (+1) | HNRPM_HUMAN  | HNRNPM   | P52272 | Heterogeneous nuclear ribonucleoprotein M (hnRNP M)                                                                                                                                                                                                                                                                                                                              | 78 kDa  | 0.27  | 199 | 97  | 104 | 11 | 30 | 22 | 33 | 36 | 19 | 25 | 23 | 1.199675602 | 0% (0.10)  |
| B7Z815_HUMAN (+2) | B5BU61_HUMAN | HDAC1    | B5BU61 | Histone deacetylase (EC 3.5.1.98)                                                                                                                                                                                                                                                                                                                                                | 55 kDa  | 0.084 | 56  | 27  | 29  | 5  | 6  | 8  | 8  | 5  | 8  | 10 | 6  | 1.19895565  | 0% (0.28)  |
| PUR2_HUMAN (+2)   | MTCH2_HUMAN  | MTCH2    | Q9Y6C9 | Mitochondrial carrier homolog 2 (Met-induced mitochondrial protein)                                                                                                                                                                                                                                                                                                              | 33 kDa  | 0.12  | 145 | 70  | 75  | 22 | 11 | 15 | 23 | 17 | 20 | 16 | 22 | 1.198391377 | 0% (0.15)  |
| LAMC2_HUMAN       | J3KT10_HUMAN | NUP85    | J3KT10 | Nuclear pore complex protein Nup85                                                                                                                                                                                                                                                                                                                                               | 70 kDa  | 0.12  | 27  | 13  | 14  | 2  | 4  | 2  | 5  | 4  | 3  | 4  | 3  | 1.198217262 | 0% (0.38)  |
| ITA2_HUMAN        | IN35_HUMAN   | IFI35    | P80217 | Interferon-induced 35 kDa protein (IFP 35) (IFI-35)                                                                                                                                                                                                                                                                                                                              | 32 kDa  | 0.11  | 28  | 13  | 14  | 1  | 1  | 2  | 9  | 3  | 3  | 3  | 5  | 1.198217262 | 0% (0.38)  |
| VATC1_HUMAN       | IMA5_HUMAN   | KPNA1    | P52294 | Importin subunit alpha-5 (Karyopherin subunit alpha-1) (Nucleoprotein interactor 1) (NPI-1) (RAG cohort protein 2) (SRP1-beta) [Cleaved into: Importin subunit alpha-5, N-terminally processed]                                                                                                                                                                                  | 60 kDa  | 0.26  | 27  | 13  | 14  | 3  | 4  | 2  | 4  | 6  | 3  | 5  | 1  | 1.198217262 | 0% (0.38)  |
| RM01_HUMAN        | PSA7_HUMAN   | PSMA7    | O14818 | Proteasome subunit alpha type-7 (EC 3.4.25.1) (Proteasome subunit RC6-1) (Proteasome subunit XAPC7)                                                                                                                                                                                                                                                                              | 28 kDa  | 0.18  | 27  | 13  | 14  | 2  | 2  | 3  | 6  | 3  | 3  | 3  | 5  | 1.198217262 | 0% (0.38)  |
| Q59FH1_HUMAN      | H12_HUMAN    | HIST1H1C | P16403 | Histone H1.2 (Histone H1c) (Histone H1d) (Histone H1s-1)                                                                                                                                                                                                                                                                                                                         | 21 kDa  | 0.035 | 117 | 57  | 61  | 5  | 20 | 15 | 17 | 12 | 16 | 14 | 18 | 1.196663853 | 0% (0.18)  |
| B2RB52_HUMAN (+4) | PSMD1_HUMAN  | PSMD1    | Q99460 | 26S proteasome non-ATPase regulatory subunit 1 (26S proteasome regulatory subunit RPN2) (26S proteasome regulatory subunit S1) (26S proteasome subunit p112)                                                                                                                                                                                                                     | 106 kDa | 0.15  | 58  | 28  | 30  | 3  | 9  | 8  | 8  | 6  | 13 | 8  | 4  | 1.196247412 | 0% (0.28)  |

|                   |              |        |        |                                                                                                                                                                                                                                                                                                                                                                                                                                      |         |       |     |     |     |    |     |     |    |     |    |     |     |             |              |
|-------------------|--------------|--------|--------|--------------------------------------------------------------------------------------------------------------------------------------------------------------------------------------------------------------------------------------------------------------------------------------------------------------------------------------------------------------------------------------------------------------------------------------|---------|-------|-----|-----|-----|----|-----|-----|----|-----|----|-----|-----|-------------|--------------|
| A8K690_HUMAN (+2) | TBB5_HUMAN   | TUBB   | P07437 | Tubulin beta chain (Tubulin beta-5 chain)                                                                                                                                                                                                                                                                                                                                                                                            | 50 kDa  | 0.17  | 676 | 328 | 350 | 93 | 84  | 80  | 73 | 98  | 96 | 75  | 80  | 1.195402631 | 95% (0.0097) |
| Q5TB53_HUMAN (+2) | ECH1_HUMAN   | ECH1   | Q13011 | Delta(3,5)-Delta(2,4)-dienoyl-CoA isomerase, mitochondrial (EC 5.3.3.-)                                                                                                                                                                                                                                                                                                                                                              | 36 kDa  | 0.19  | 150 | 73  | 78  | 16 | 20  | 14  | 24 | 17  | 31 | 10  | 19  | 1.195221829 | 0% (0.15)    |
| A8KAQ5_HUMAN (+1) | CH60_HUMAN   | HSPD1  | P10809 | 60 kDa heat shock protein, mitochondrial (60 kDa chaperonin) (Chaperonin 60) (CPN60) (Heat shock protein 60) (HSP-60) (Hsp60) (HuCHA60) (Mitochondrial matrix protein P1) (P60 lymphocyte protein)                                                                                                                                                                                                                                   | 61 kDa  | 0.11  | 869 | 422 | 450 | 86 | 133 | 110 | 91 | 118 | 98 | 120 | 115 | 1.194937522 | 95% (0.0040) |
| F8RZC1_HUMAN      | RAB1A_HUMAN  | RAB1A  | P62820 | Ras-related protein Rab-1A (YPT1-related protein)                                                                                                                                                                                                                                                                                                                                                                                    | 23 kDa  | 0.12  | 217 | 104 | 111 | 29 | 27  | 30  | 20 | 20  | 32 | 22  | 38  | 1.194381905 | 0% (0.10)    |
| F120A_HUMAN       | MPPA_HUMAN   | PMPCA  | Q10713 | Mitochondrial-processing peptidase subunit alpha (EC 3.4.24.64) (Alpha-MPP) (P-55)                                                                                                                                                                                                                                                                                                                                                   | 58 kDa  | 0.063 | 60  | 29  | 31  | 6  | 6   | 5   | 12 | 14  | 6  | 4   | 7   | 1.193718345 | 0% (0.28)    |
| A1L172_HUMAN (+2) | D3YTB1_HUMAN | RPL32  | D3YTB1 | 60S ribosomal protein L32 (Fragment)                                                                                                                                                                                                                                                                                                                                                                                                 | 16 kDa  | 0.19  | 29  | 14  | 15  | 3  | 3   | 3   | 5  | 3   | 10 | 2   | 0   | 1.193066859 | 0% (0.38)    |
| EFHD2_HUMAN       | B4E2Q0_HUMAN | ATP2C1 | B4E2Q0 | ATPase, Ca++ transporting, type 2C, member 1, isoform CRA_1 (cDNA FLJ55630, highly similar to Calcium-transporting ATPase type 2C member 1 (EC 3.6.3.8))                                                                                                                                                                                                                                                                             | 105 kDa | 0.2   | 29  | 14  | 15  | 5  | 5   | 4   | 0  | 3   | 1  | 4   | 7   | 1.193066859 | 0% (0.38)    |
| F5GZY0_HUMAN      | A8K566_HUMAN | A8K566 | A8K566 | cDNA FLJ78246, highly similar to Homo sapiens splicing factor 3a, subunit 3, 60kDa (SF3A3), mRNA                                                                                                                                                                                                                                                                                                                                     | 59 kDa  | 0.12  | 29  | 14  | 15  | 0  | 5   | 5   | 4  | 4   | 2  | 5   | 4   | 1.193066859 | 0% (0.38)    |
| SCRB2_HUMAN       | SMD1_HUMAN   | SNRPD1 | P62314 | Small nuclear ribonucleoprotein Sm D1 (Sm-D1) (Sm-D autoantigen) (snRNP core protein D1)                                                                                                                                                                                                                                                                                                                                             | 13 kDa  | 0.13  | 29  | 14  | 15  | 3  | 2   | 3   | 6  | 3   | 2  | 6   | 4   | 1.193066859 | 0% (0.38)    |
| MCM6_HUMAN (+1)   | B2R7I0_HUMAN | B2R7I0 | B2R7I0 | cDNA, FLJ93451, highly similar to Homo sapiens thioredoxin domain containing 14 (TXNDC14), mRNA                                                                                                                                                                                                                                                                                                                                      | 34 kDa  | 0.15  | 29  | 14  | 15  | 3  | 2   | 3   | 6  | 2   | 2  | 5   | 6   | 1.193066859 | 0% (0.38)    |
| A6NNI4_HUMAN (+3) | A8K2D6_HUMAN | A8K2D6 | A8K2D6 | cDNA FLJ76011, highly similar to Homo sapiens lactamase, beta 2 (LACTB2), mRNA                                                                                                                                                                                                                                                                                                                                                       | 33 kDa  | 0.21  | 29  | 14  | 15  | 1  | 4   | 2   | 7  | 6   | 3  | 4   | 2   | 1.193066859 | 0% (0.38)    |
| FUBP2_HUMAN       | F5H0M4_HUMAN | LPCAT3 | F5H0M4 | Lysophospholipid acyltransferase 5                                                                                                                                                                                                                                                                                                                                                                                                   | 39 kDa  | 0.12  | 29  | 14  | 15  | 6  | 0   | 2   | 6  | 1   | 7  | 4   | 3   | 1.193066859 | 0% (0.38)    |
| DRS7B_HUMAN       | B4DJ30_HUMAN | B4DJ30 | B4DJ30 | cDNA FLJ61290, highly similar to Neutral alpha-glucosidase AB                                                                                                                                                                                                                                                                                                                                                                        | 113 kDa | 0.21  | 415 | 202 | 215 | 46 | 65  | 51  | 42 | 38  | 47 | 56  | 73  | 1.191812311 | 95% (0.037)  |
| MFN2_HUMAN        | ODB2_HUMAN   | DBT    | P11182 | Lipoamide acyltransferase component of branched-chain alpha-keto acid dehydrogenase complex, mitochondrial (EC 2.3.1.168) (Branched-chain alpha-keto acid dehydrogenase complex component E2) (BCKAD-E2) (BCKADE2) (Dihydrolipoamide acetyltransferase component of branched-chain alpha-keto acid dehydrogenase complex) (Dihydrolipoamide branched chain transacylase) (Dihydrolipoalysine-residue (2-methylpropanoyl)transferase) | 53 kDa  | 0.13  | 62  | 30  | 32  | 12 | 4   | 3   | 11 | 12  | 7  | 7   | 6   | 1.191351248 | 0% (0.28)    |
| MTX1_HUMAN        | IPO7_HUMAN   | IPO7   | O95373 | Importin-7 (Imp7) (Ran-binding protein 7) (RanBP7)                                                                                                                                                                                                                                                                                                                                                                                   | 120 kDa | 0.14  | 63  | 30  | 32  | 0  | 10  | 13  | 7  | 10  | 8  | 9   | 5   | 1.191351248 | 0% (0.28)    |
| Q0VGA5_HUMAN (+3) | ATPO_HUMAN   | ATP5O  | P48047 | ATP synthase subunit O, mitochondrial (Oligomycin sensitivity conferral protein) (OSCP)                                                                                                                                                                                                                                                                                                                                              | 23 kDa  | 0.19  | 95  | 46  | 49  | 13 | 8   | 8   | 17 | 11  | 13 | 13  | 13  | 1.190828974 | 0% (0.22)    |
| B4DN31_HUMAN (+2) | B2R4C0_HUMAN | B2R4C0 | B2R4C0 | 60S ribosomal protein L18a                                                                                                                                                                                                                                                                                                                                                                                                           | 21 kDa  | 0.18  | 64  | 31  | 33  | 7  | 8   | 6   | 10 | 9   | 12 | 6   | 7   | 1.189131055 | 0% (0.28)    |
| FKBP2_HUMAN       | FKB10_HUMAN  | FKBP10 | Q96AY3 | Peptidyl-prolyl cis-trans isomerase FKBP10 (PPIase FKBP10) (EC 5.2.1.8) (65 kDa FK506-binding protein) (65 kDa FKBP) (FKBP-65)                                                                                                                                                                                                                                                                                                       | 64 kDa  | 0.35  | 30  | 15  | 16  | 1  | 5   | 2   | 7  | 10  | 1  | 3   | 2   | 1.188550563 | 0% (0.37)    |

|                  |              |          |        |                                                                                                                                                                                                                                                                                                                                                                         |         |       |     |     |     |    |    |    |    |    |    |    |    |             |    |         |
|------------------|--------------|----------|--------|-------------------------------------------------------------------------------------------------------------------------------------------------------------------------------------------------------------------------------------------------------------------------------------------------------------------------------------------------------------------------|---------|-------|-----|-----|-----|----|----|----|----|----|----|----|----|-------------|----|---------|
|                  |              |          |        | (FK506-binding protein 10) (FKBP-10) (Immunophilin FKBP65) (Rotamase)                                                                                                                                                                                                                                                                                                   |         |       |     |     |     |    |    |    |    |    |    |    |    |             |    |         |
| H0YF29_HUMAN     | A8K486_HUMAN |          | A8K486 | Peptidyl-prolyl cis-trans isomerase (EC 5.2.1.8)                                                                                                                                                                                                                                                                                                                        | 18 kDa  | 0.22  | 206 | 98  | 104 | 15 | 30 | 18 | 37 | 27 | 37 | 20 | 22 | 1.187572913 | 0% | (0.12)  |
| VAPB_HUMAN       | E9PL22_HUMAN | HYOU1    | E9PL22 | Hypoxia up-regulated protein 1                                                                                                                                                                                                                                                                                                                                          | 105 kDa | 0.25  | 272 | 132 | 140 | 27 | 49 | 37 | 20 | 32 | 37 | 32 | 39 | 1.187203676 | 0% | (0.082) |
| B4DT35_HUMAN(+3) | AMRP_HUMAN   | LRPAP1   | P30533 | Alpha-2-macroglobulin receptor-associated protein (Alpha-2-MRAP) (Low density lipoprotein receptor-related protein-associated protein 1) (RAP)                                                                                                                                                                                                                          | 41 kDa  | 0.16  | 33  | 16  | 17  | 1  | 6  | 5  | 4  | 2  | 3  | 7  | 5  | 1.184558096 | 0% | (0.37)  |
| B4DVA7_HUMAN(+1) | DPP4_HUMAN   | DPP4     | P27487 | Dipeptidyl peptidase 4 (EC 3.4.14.5) (ADABP) (Adenosine deaminase complexing protein 2) (ADCP-2) (Dipeptidyl peptidase IV) (DPP IV) (T-cell activation antigen CD26) (TP103) (CD antigen CD26) [Cleaved into: Dipeptidyl peptidase 4 membrane form (Dipeptidyl peptidase IV membrane form); Dipeptidyl peptidase 4 soluble form (Dipeptidyl peptidase IV soluble form)] | 88 kDa  | 0.15  | 33  | 16  | 17  | 16 | 0  | 0  | 0  | 5  | 3  | 2  | 7  | 1.184558096 | 0% | (0.37)  |
| RS26_HUMAN       | B2RB52_HUMAN |          | B2RB52 | cDNA, FLJ95314, highly similar to Homo sapiens transducin (beta)-like 2 (TBL2), transcript variant 1, mRNA                                                                                                                                                                                                                                                              | 50 kDa  | 0.31  | 32  | 16  | 17  | 3  | 3  | 6  | 4  | 2  | 0  | 8  | 7  | 1.184558096 | 0% | (0.37)  |
| CUL4A_HUMAN      | PGK1_HUMAN   | PGK1     | P00558 | Phosphoglycerate kinase 1 (EC 2.7.2.3) (Cell migration-inducing gene 10 protein) (Primer recognition protein 2) (PRP 2)                                                                                                                                                                                                                                                 | 45 kDa  | 0.15  | 290 | 141 | 149 | 24 | 33 | 40 | 46 | 40 | 45 | 42 | 23 | 1.182965924 | 0% | (0.079) |
| VPS45_HUMAN      | H13_HUMAN    | HIST1H1D | P16402 | Histone H1.3 (Histone H1c) (Histone H1s-2)                                                                                                                                                                                                                                                                                                                              | 22 kDa  | 0.11  | 106 | 52  | 55  | 5  | 19 | 14 | 14 | 12 | 13 | 13 | 17 | 1.182829277 | 0% | (0.21)  |
| A2MG_HUMAN       | CY1_HUMAN    | CYC1     | P08574 | Cytochrome c1, heme protein, mitochondrial (Complex III subunit 4) (Complex III subunit IV) (Cytochrome b-c1 complex subunit 4) (Ubiquinol-cytochrome-c reductase complex cytochrome c1 subunit) (Cytochrome c-1)                                                                                                                                                       | 35 kDa  | 0.095 | 71  | 35  | 37  | 10 | 5  | 8  | 12 | 12 | 4  | 10 | 11 | 1.181476167 | 0% | (0.27)  |
| H3BN02_HUMAN(+1) | Q2TU34_HUMAN | FBP1     | Q2TU34 | Fructose-1,6-bisphosphatase 1 (Growth-inhibiting protein 17) (cDNA FLJ75786, highly similar to Homo sapiens fructose-1,6-bisphosphatase 1 (FBP1), mRNA)                                                                                                                                                                                                                 | 37 kDa  | 0.09  | 72  | 35  | 37  | 8  | 12 | 15 | 0  | 0  | 7  | 13 | 17 | 1.181476167 | 0% | (0.27)  |
| B2R5V2_HUMAN(+1) | A1KYQ7_HUMAN | EIF3C    | A1KYQ7 | Eukaryotic translation initiation factor 3 subunit C (eIF3c) (Eukaryotic translation initiation factor 3 subunit 8) (eIF3 p110)                                                                                                                                                                                                                                         | 105 kDa | 0.16  | 35  | 17  | 18  | 0  | 6  | 7  | 4  | 3  | 7  | 2  | 5  | 1.181003347 | 0% | (0.36)  |
| B2R4D8_HUMAN(+1) | G3V2S9_HUMAN | SLIRP    | G3V2S9 | SRA stem-loop-interacting RNA-binding protein, mitochondrial                                                                                                                                                                                                                                                                                                            | 14 kDa  | 0.21  | 35  | 17  | 18  | 3  | 5  | 5  | 4  | 6  | 5  | 4  | 3  | 1.181003347 | 0% | (0.36)  |
| J3KT10_HUMAN(+1) | B4DWI8_HUMAN |          | B4DWI8 | cDNA FLJ57805, highly similar to Homo sapiens paraspeckle component 1 (PSPC1), transcript variant alpha, mRNA                                                                                                                                                                                                                                                           | 53 kDa  | 0.11  | 34  | 17  | 18  | 8  | 2  | 2  | 4  | 1  | 4  | 6  | 7  | 1.181003347 | 0% | (0.36)  |
| ECI2_HUMAN(+3)   | VTNC_HUMAN   | VTN      | P04004 | Vitronectin (VN) (S-protein) (Serum-spreading factor) (V75) [Cleaved into: Vitronectin V65 subunit; Vitronectin V10 subunit; Somatomedin-B]                                                                                                                                                                                                                             | 54 kDa  | 0.18  | 35  | 17  | 18  | 2  | 1  | 1  | 13 | 2  | 5  | 2  | 9  | 1.181003347 | 0% | (0.36)  |
| FAF2_HUMAN       | B2R8R5_HUMAN |          | B2R8R5 | cDNA, FLJ94025, highly similar to Homo sapiens tripartite motif-containing 28 (TRIM28), mRNA                                                                                                                                                                                                                                                                            | 89 kDa  | 0.17  | 148 | 72  | 76  | 13 | 19 | 19 | 22 | 26 | 11 | 25 | 14 | 1.180944912 | 0% | (0.17)  |
| ETHE1_HUMAN(+1)  | DEGS1_HUMAN  | DEGS1    | O15121 | Sphingolipid delta(4)-desaturase DES1 (EC 1.14.-.-) (Cell migration-inducing gene                                                                                                                                                                                                                                                                                       | 38 kDa  | 0.2   | 37  | 18  | 19  | 5  | 3  | 7  | 3  | 4  | 4  | 4  | 7  | 1.177818103 | 0% | (0.36)  |



|                  |              |         |        |                                                                                                                                                                                                            |        |       |     |     |     |    |    |    |    |    |    |    |    |             |     |         |
|------------------|--------------|---------|--------|------------------------------------------------------------------------------------------------------------------------------------------------------------------------------------------------------------|--------|-------|-----|-----|-----|----|----|----|----|----|----|----|----|-------------|-----|---------|
|                  |              |         |        | 15 protein) (Degenerative spermatocyte homolog 1) (Membrane lipid desaturase)                                                                                                                              |        |       |     |     |     |    |    |    |    |    |    |    |    |             |     |         |
| IN35_HUMAN       | B7ZW51_HUMAN |         | B7ZW51 | Uncharacterized protein                                                                                                                                                                                    | 28 kDa | 0.29  | 37  | 18  | 19  | 0  | 0  | 0  | 5  | 0  | 4  | 0  | 11 | 1.177818103 | 0%  | (0.36)  |
| FAH2A_HUMAN      | Q86VG2_HUMAN | SFPQ    | Q86VG2 | Splicing factor proline/glutamine-rich (Polypyrimidine tract binding protein associated)                                                                                                                   | 76 kDa | 0.24  | 78  | 38  | 40  | 12 | 9  | 7  | 11 | 10 | 4  | 12 | 15 | 1.176759826 | 0%  | (0.26)  |
| PECA1_HUMAN      | COF1_HUMAN   | CFL1    | P23528 | Cofilin-1 (18 kDa phosphoprotein) (p18) (Cofilin, non-muscle isoform)                                                                                                                                      | 19 kDa | 0.15  | 120 | 58  | 61  | 8  | 14 | 14 | 22 | 13 | 24 | 13 | 12 | 1.176451868 | 0%  | (0.20)  |
| B4DLC3_HUMAN(+2) | ACATN_HUMAN  | SLC33A1 | O00400 | Acetyl-coenzyme A transporter 1 (AT-1) (Acetyl-CoA transporter 1) (Solute carrier family 33 member 1)                                                                                                      | 61 kDa | 0.19  | 39  | 19  | 20  | 8  | 3  | 4  | 4  | 6  | 4  | 6  | 5  | 1.17494762  | 0%  | (0.36)  |
| FA49B_HUMAN      | SPON1_HUMAN  | SPON1   | Q9HCB6 | Spondin-1 (F-spondin) (Vascular smooth muscle cell growth-promoting factor)                                                                                                                                | 91 kDa | 0.28  | 40  | 20  | 21  | 4  | 8  | 4  | 4  | 7  | 2  | 5  | 7  | 1.172347463 | 0%  | (0.35)  |
| OAS2_HUMAN       | HSP7C_HUMAN  | HSPA8   | P11142 | Heat shock cognate 71 kDa protein (Heat shock 70 kDa protein 8)                                                                                                                                            | 71 kDa | 0.17  | 597 | 292 | 305 | 73 | 94 | 69 | 55 | 63 | 80 | 86 | 76 | 1.169986789 | 95% | (0.027) |
| RM09_HUMAN       | B3KXZ4_HUMAN |         | B3KXZ4 | cDNA FLJ46429 fis, clone THYMU3014372, highly similar to DNA replication licensing factor MCM2                                                                                                             | 91 kDa | 0.21  | 42  | 21  | 22  | 0  | 11 | 8  | 1  | 12 | 4  | 5  | 0  | 1.169981182 | 0%  | (0.35)  |
| INF2_HUMAN       | NDUS8_HUMAN  | NDUFS8  | O00217 | NADH dehydrogenase [ubiquinone] iron-sulfur protein 8, mitochondrial (EC 1.6.5.3) (EC 1.6.99.3) (Complex I-23kD) (CI-23kD) (NADH-ubiquinone oxidoreductase 23 kDa subunit) (TYKY subunit)                  | 24 kDa | 0.13  | 43  | 21  | 22  | 6  | 4  | 5  | 6  | 5  | 4  | 6  | 8  | 1.169981182 | 0%  | (0.35)  |
| PRS4_HUMAN       | SSRD_HUMAN   | SSR4    | P51571 | Translocin-associated protein subunit delta (TRAP-delta) (Signal sequence receptor subunit delta) (SSR-delta)                                                                                              | 19 kDa | 0.18  | 43  | 21  | 22  | 5  | 3  | 3  | 10 | 3  | 6  | 7  | 6  | 1.169981182 | 0%  | (0.35)  |
| Q53HJ4_HUMAN     | A3R0T7_HUMAN |         | A3R0T7 | Liver histone H1e                                                                                                                                                                                          | 22 kDa | 0.12  | 134 | 66  | 69  | 0  | 23 | 17 | 20 | 14 | 17 | 16 | 21 | 1.169721716 | 0%  | (0.20)  |
| A8K335_HUMAN(+1) | STT3B_HUMAN  | STT3B   | Q8TCJ2 | Dolichyl-diphosphooligosaccharide--protein glycosyltransferase subunit STT3B (Oligosaccharyl transferase subunit STT3B) (STT3-B) (EC 2.4.99.18) (Source of immunodominant MHC-associated peptides homolog) | 94 kDa | 0.24  | 88  | 44  | 46  | 17 | 8  | 10 | 9  | 10 | 13 | 11 | 12 | 1.169205314 | 0%  | (0.25)  |
| B3KUF6_HUMAN(+1) | DCXR_HUMAN   | DCXR    | Q7Z4W1 | L-xylulose reductase (XR) (EC 1.1.1.10) (Carbonyl reductase II) (Dicarbonyl/L-xylulose reductase) (Kidney dicarbonyl reductase) (kiDCR) (Sperm surface protein P34H)                                       | 26 kDa | 0.27  | 46  | 22  | 23  | 1  | 8  | 8  | 5  | 5  | 9  | 4  | 6  | 1.167818601 | 0%  | (0.35)  |
| B4DEK2_HUMAN(+2) | Q59GL1_HUMAN |         | Q59GL1 | Synaptotagmin binding, cytoplasmic RNA interacting protein variant (Fragment)                                                                                                                              | 60 kDa | 0.19  | 193 | 95  | 99  | 10 | 33 | 34 | 21 | 25 | 4  | 50 | 21 | 1.166373963 | 0%  | (0.15)  |
| CHP1_HUMAN       | HSPB1_HUMAN  | HSPB1   | P04792 | Heat shock protein beta-1 (HspB1) (28 kDa heat shock protein) (Estrogen-regulated 24 kDa protein) (Heat shock 27 kDa protein) (HSP 27) (Stress-responsive protein 27) (SRP27)                              | 23 kDa | 0.46  | 147 | 71  | 74  | 11 | 17 | 22 | 23 | 18 | 32 | 15 | 11 | 1.166273775 | 0%  | (0.19)  |
| RAB43_HUMAN(+1)  | RAB7A_HUMAN  | RAB7A   | P51149 | Ras-related protein Rab-7a                                                                                                                                                                                 | 23 kDa | 0.27  | 250 | 123 | 128 | 36 | 30 | 30 | 30 | 30 | 23 | 34 | 40 | 1.164966235 | 0%  | (0.12)  |
| J3KTE4_HUMAN(+4) | B4DJX1_HUMAN |         | B4DJX1 | cDNA FLJ50978, highly similar to Dihydroliopolysine-residue acetyltransferase component of pyruvate dehydrogenase complex, mitochondrial (EC 2.3.1.12)                                                     | 63 kDa | 0.22  | 100 | 49  | 51  | 19 | 11 | 12 | 10 | 16 | 8  | 11 | 16 | 1.164289878 | 0%  | (0.25)  |
| C9JL16_HUMAN(+2) | PGRC1_HUMAN  | PGRMC1  | O00264 | Membrane-associated progesterone receptor component 1 (mPR)                                                                                                                                                | 22 kDa | 0.25  | 49  | 24  | 25  | 6  | 3  | 6  | 9  | 4  | 9  | 7  | 5  | 1.164007728 | 0%  | (0.34)  |
| YMEL1_HUMAN      | F8W1R7_HUMAN | MYL6    | F8W1R7 | Myosin light polypeptide 6                                                                                                                                                                                 | 16 kDa | 0.082 | 101 | 50  | 52  | 13 | 11 | 10 | 17 | 8  | 13 | 17 | 12 | 1.163422086 | 0%  | (0.24)  |

|                   |              |          |        |                                                                                                                                                                                                                                                                                                                                                                                                                 |         |       |     |     |     |    |    |    |    |    |    |    |    |             |            |
|-------------------|--------------|----------|--------|-----------------------------------------------------------------------------------------------------------------------------------------------------------------------------------------------------------------------------------------------------------------------------------------------------------------------------------------------------------------------------------------------------------------|---------|-------|-----|-----|-----|----|----|----|----|----|----|----|----|-------------|------------|
| A4_HUMAN (+2)     | SUCB2_HUMAN  | SUCLG2   | Q96199 | Succinyl-CoA ligase [GDP-forming] subunit beta, mitochondrial (EC 6.2.1.4) (GTP-specific succinyl-CoA synthetase subunit beta) (Succinyl-CoA synthetase beta-G chain) (SCS-betaG)                                                                                                                                                                                                                               | 47 kDa  | 0.13  | 105 | 51  | 53  | 17 | 12 | 11 | 11 | 21 | 10 | 11 | 11 | 1.162587577 | 0% (0.24)  |
| GHC1_HUMAN        | Q53HH4_HUMAN |          | Q53HH4 | Ras-GTPase-activating protein SH3-domain-binding protein variant (Fragment)                                                                                                                                                                                                                                                                                                                                     | 52 kDa  | 0.11  | 53  | 26  | 27  | 3  | 9  | 9  | 5  | 13 | 1  | 12 | 1  | 1.160756755 | 0% (0.33)  |
| R4GN98_HUMAN (+1) | VATE1_HUMAN  | ATP6V1E1 | P36543 | V-type proton ATPase subunit E 1 (V-ATPase subunit E 1) (V-ATPase 31 kDa subunit) (p31) (Vacuolar proton pump subunit E 1)                                                                                                                                                                                                                                                                                      | 26 kDa  | 0.38  | 52  | 26  | 27  | 8  | 7  | 7  | 5  | 3  | 7  | 8  | 10 | 1.160756755 | 0% (0.33)  |
| HTAI2_HUMAN       | ECHA_HUMAN   | HADHA    | P40939 | Trifunctional enzyme subunit alpha, mitochondrial (78 kDa gastrin-binding protein) (TP-alpha) [Includes: Long-chain enoyl-CoA hydratase (EC 4.2.1.17); Long chain 3-hydroxyacyl-CoA dehydrogenase (EC 1.1.1.211)]                                                                                                                                                                                               | 83 kDa  | 0.27  | 461 | 227 | 235 | 82 | 56 | 45 | 42 | 48 | 33 | 55 | 98 | 1.159388012 | 0% (0.056) |
| Q53FN0_HUMAN      | H0YK72_HUMAN | SEC11A   | H0YK72 | SEC11-like 1 (S. cerevisiae), isoform CRA_a (Signal peptidase complex catalytic subunit SEC11A)                                                                                                                                                                                                                                                                                                                 | 19 kDa  | 0.19  | 55  | 27  | 28  | 6  | 4  | 7  | 10 | 5  | 8  | 6  | 9  | 1.15930407  | 0% (0.33)  |
| TALDO_HUMAN       | B0YIW6_HUMAN | ARCN1    | B0YIW6 | Archain 1, isoform CRA_a (Costomer subunit delta) (Costomer subunit delta variant 2)                                                                                                                                                                                                                                                                                                                            | 62 kDa  | 0.28  | 55  | 27  | 28  | 0  | 7  | 9  | 11 | 5  | 13 | 7  | 4  | 1.15930407  | 0% (0.33)  |
| B4E1Z4_HUMAN      | J3KN36_HUMAN | NOMO3    | J3KN36 | Nodal modulator 3                                                                                                                                                                                                                                                                                                                                                                                               | 139 kDa | 0.041 | 114 | 56  | 58  | 17 | 14 | 15 | 10 | 13 | 12 | 13 | 21 | 1.158853233 | 0% (0.24)  |
| B3KMC9_HUMAN (+3) | GPDM_HUMAN   | GPD2     | P43304 | Glycerol-3-phosphate dehydrogenase, mitochondrial (GPD-M) (GPDH-M) (EC 1.1.5.3) (mtGPD)                                                                                                                                                                                                                                                                                                                         | 81 kDa  | 0.15  | 232 | 115 | 119 | 38 | 30 | 28 | 20 | 22 | 18 | 30 | 50 | 1.158403043 | 0% (0.14)  |
| C9JVN9_HUMAN      | Q96CP5_HUMAN | PMPCB    | Q96CP5 | PMPCB protein (Fragment)                                                                                                                                                                                                                                                                                                                                                                                        | 54 kDa  | 0.15  | 58  | 28  | 29  | 6  | 6  | 8  | 8  | 20 | 4  | 1  | 6  | 1.157950831 | 0% (0.33)  |
| TNAP2_HUMAN       | ECI1_HUMAN   | ECI1     | P42126 | Enoyl-CoA delta isomerase 1, mitochondrial (EC 5.3.3.8) (3,2-trans-enoyl-CoA isomerase) (Delta(3),Delta(2)-enoyl-CoA isomerase) (D3,D2-enoyl-CoA isomerase) (Dodecenoyl-CoA isomerase)                                                                                                                                                                                                                          | 33 kDa  | 0.21  | 57  | 28  | 29  | 6  | 7  | 6  | 9  | 9  | 5  | 8  | 7  | 1.157950831 | 0% (0.33)  |
| RS12_HUMAN        | RLA2_HUMAN   | RPLP2    | P05387 | 60S acidic ribosomal protein P2 (Renal carcinoma antigen NY-REN-44)                                                                                                                                                                                                                                                                                                                                             | 12 kDa  | 0.32  | 57  | 28  | 29  | 6  | 8  | 6  | 8  | 7  | 8  | 7  | 7  | 1.157950831 | 0% (0.33)  |
| EIF3M_HUMAN       | B4DJA5_HUMAN | RAB5A    | B4DJA5 | Ras-related protein Rab-5A (cDNA FLJ51867, highly similar to Ras-related protein Rab-5A)                                                                                                                                                                                                                                                                                                                        | 22 kDa  | 0.28  | 57  | 28  | 29  | 7  | 8  | 7  | 6  | 7  | 7  | 6  | 8  | 1.157950831 | 0% (0.33)  |
| A8KAH1_HUMAN (+1) | A8K7H3_HUMAN |          | A8K7H3 | cDNA FLJ77670, highly similar to Homo sapiens ribosomal protein S15a (RPS15A), mRNA                                                                                                                                                                                                                                                                                                                             | 15 kDa  | 0.11  | 58  | 28  | 29  | 5  | 6  | 7  | 10 | 9  | 14 | 5  | 3  | 1.157950831 | 0% (0.33)  |
| COR1B_HUMAN       | B2R5M9_HUMAN |          | B2R5M9 | cDNA, FLJ92537, highly similar to Homo sapiens procollagen-lysine, 2-oxoglutarate 5-dioxygenase (lysine hydroxylase, Ehlers-Danlos syndrome type VI) (PLOD), mRNA                                                                                                                                                                                                                                               | 84 kDa  | 0.12  | 120 | 59  | 61  | 11 | 17 | 17 | 14 | 9  | 14 | 17 | 21 | 1.156910821 | 0% (0.23)  |
| TIDC1_HUMAN       | XRCC5_HUMAN  | XRCC5    | P13010 | X-ray repair cross-complementing protein 5 (EC 3.6.4.-) (86 kDa subunit of Ku antigen) (ATP-dependent DNA helicase 2 subunit 2) (ATP-dependent DNA helicase II 80 kDa subunit) (CTC box-binding factor 85 kDa subunit) (CTC85) (CTCBF) (DNA repair protein XRCC5) (Ku80) (Ku86) (Lupus Ku autoantigen protein p86) (Nuclear factor IV) (Thyroid-lupus autoantigen) (TLAA) (X-ray repair complementing defective | 83 kDa  | 0.15  | 182 | 90  | 93  | 11 | 33 | 23 | 24 | 26 | 26 | 22 | 17 | 1.156626281 | 0% (0.17)  |

|                   |              |          |        |                                                                                                                                                                                                                                                                                                                                                                                                                                                                                                   |         |       |     |     |     |    |    |    |    |    |    |    |    |             |    |        |  |
|-------------------|--------------|----------|--------|---------------------------------------------------------------------------------------------------------------------------------------------------------------------------------------------------------------------------------------------------------------------------------------------------------------------------------------------------------------------------------------------------------------------------------------------------------------------------------------------------|---------|-------|-----|-----|-----|----|----|----|----|----|----|----|----|-------------|----|--------|--|
|                   |              |          |        | repair in Chinese hamster cells 5 (double-strand-break rejoining))                                                                                                                                                                                                                                                                                                                                                                                                                                |         |       |     |     |     |    |    |    |    |    |    |    |    |             |    |        |  |
| RL11_HUMAN        | B4DPK2_HUMAN |          | B4DPK2 | cDNA FLJ59729, highly similar to DnaI1 homolog subfamily C member 11                                                                                                                                                                                                                                                                                                                                                                                                                              | 59 kDa  | 0.24  | 61  | 30  | 31  | 12 | 4  | 0  | 14 | 10 | 11 | 4  | 6  | 1.155504506 | 0% | (0.32) |  |
| ISOC2_HUMAN (+2)  | B3KM97_HUMAN |          | B3KM97 | cDNA FLJ10554 fis, clone NT2RP2002385, highly similar to Synaptic glycoprotein SC2                                                                                                                                                                                                                                                                                                                                                                                                                | 36 kDa  | 0.16  | 70  | 35  | 36  | 13 | 8  | 7  | 8  | 10 | 10 | 8  | 9  | 1.150571342 | 0% | (0.31) |  |
| SPTC1_HUMAN       | HNRL2_HUMAN  | HNRNPUL2 | Q1KMD3 | Heterogeneous nuclear ribonucleoprotein U-like protein 2 (Scaffold-attachment factor A2) (SAF-A2)                                                                                                                                                                                                                                                                                                                                                                                                 | 85 kDa  | 0.13  | 151 | 75  | 77  | 14 | 23 | 22 | 16 | 16 | 6  | 42 | 12 | 1.149139564 | 0% | (0.21) |  |
| A8MUB1_HUMAN (+1) | B2RB06_HUMAN |          | B2RB06 | cDNA, FLJ95242, highly similar to Homo sapiens L-3-hydroxyacyl-Coenzyme A dehydrogenase, short chain (HADHSC), mRNA                                                                                                                                                                                                                                                                                                                                                                               | 34 kDa  | 0.43  | 77  | 38  | 39  | 10 | 8  | 8  | 12 | 11 | 9  | 10 | 9  | 1.148215789 | 0% | (0.30) |  |
| APOOL_HUMAN       | TOM70_HUMAN  | TOMM70A  | O94826 | Mitochondrial import receptor subunit TOM70 (Mitochondrial precursor proteins import receptor) (Translocase of outer membrane 70 kDa subunit)                                                                                                                                                                                                                                                                                                                                                     | 67 kDa  | 0.28  | 76  | 38  | 39  | 13 | 10 | 9  | 5  | 13 | 4  | 10 | 12 | 1.148215789 | 0% | (0.30) |  |
| RM13_HUMAN        | VDAC3_HUMAN  | VDAC3    | Q9Y277 | Voltage-dependent anion-selective channel protein 3 (VDAC-3) (hVDAC3) (Outer mitochondrial membrane protein porin 3)                                                                                                                                                                                                                                                                                                                                                                              | 31 kDa  | 0.32  | 159 | 79  | 81  | 29 | 14 | 15 | 21 | 19 | 27 | 20 | 16 | 1.147682661 | 0% | (0.21) |  |
| MCAT_HUMAN        | CBX3_HUMAN   | CBX3     | Q13185 | Chromobox protein homolog 3 (HECH) (Heterochromatin protein 1 homolog gamma) (HP1 gamma) (Modifier 2 protein)                                                                                                                                                                                                                                                                                                                                                                                     | 21 kDa  | 0.31  | 90  | 44  | 45  | 7  | 13 | 11 | 14 | 12 | 10 | 15 | 8  | 1.144443755 | 0% | (0.29) |  |
| B4DHJ3_HUMAN (+2) | F213A_HUMAN  | FAM213A  | Q9BRX8 | Redox-regulatory protein FAM213A (Peroxiredoxin-like 2 activated in M-CSF stimulated monocytes) (Protein PAMM)                                                                                                                                                                                                                                                                                                                                                                                    | 26 kDa  | 0.13  | 97  | 48  | 49  | 20 | 10 | 9  | 9  | 8  | 14 | 9  | 18 | 1.142441063 | 0% | (0.28) |  |
| AL4A1_HUMAN       | XRCC6_HUMAN  | XRCC6    | P12956 | X-ray repair cross-complementing protein 6 (EC 3.6.4.-) (EC 4.2.99.-) (5'-deoxyribose-5-phosphate lyase Ku70) (5'-dRP lyase Ku70) (70 kDa subunit of Ku antigen) (ATP-dependent DNA helicase 2 subunit 1) (ATP-dependent DNA helicase II 70 kDa subunit) (CTC box-binding factor 75 kDa subunit) (CTC75) (CTCBF) (DNA repair protein XRCC6) (Lupus Ku autoantigen protein p70) (Ku70) (Thyroid-lupus autoantigen) (TLAA) (X-ray repair complementing defective repair in Chinese hamster cells 6) | 70 kDa  | 0.11  | 221 | 110 | 112 | 18 | 31 | 34 | 28 | 33 | 26 | 30 | 22 | 1.139960737 | 0% | (0.17) |  |
| Q53EY4_HUMAN (+1) | TOM40_HUMAN  | TOMM40   | O96008 | Mitochondrial import receptor subunit TOM40 homolog (Protein Haymaker) (Translocase of outer membrane 40 kDa subunit homolog) (p38.5)                                                                                                                                                                                                                                                                                                                                                             | 38 kDa  | 0.43  | 113 | 56  | 57  | 14 | 10 | 8  | 24 | 11 | 16 | 13 | 18 | 1.139278127 | 0% | (0.27) |  |
| SYCM_HUMAN        | CALR_HUMAN   | CALR     | P27797 | Calreticulin (CRP55) (Calregulin) (Endoplasmic reticulum resident protein 60) (ERp60) (HACBP) (grp60)                                                                                                                                                                                                                                                                                                                                                                                             | 48 kDa  | 0.16  | 267 | 134 | 135 | 34 | 43 | 33 | 25 | 27 | 28 | 42 | 39 | 1.128134174 | 0% | (0.17) |  |
| DNM1L_HUMAN       | A8K9A4_HUMAN |          | A8K9A4 | cDNA FLJ75154, highly similar to Homo sapiens heterogeneous nuclear ribonucleoprotein C (C1/C2), mRNA                                                                                                                                                                                                                                                                                                                                                                                             | 34 kDa  | 0.15  | 303 | 151 | 152 | 31 | 40 | 36 | 44 | 44 | 26 | 46 | 38 | 1.12723922  | 0% | (0.15) |  |
| A8K435_HUMAN (+1) | PRP8_HUMAN   | PRPF8    | Q6P2Q9 | Pre-mRNA-processing-splicing factor 8 (220 kDa U5 snRNP-specific protein) (PRP8 homolog) (Splicing factor Prp8) (p220)                                                                                                                                                                                                                                                                                                                                                                            | 274 kDa | 0.097 | 193 | 96  | 96  | 25 | 27 | 23 | 21 | 23 | 16 | 36 | 21 | 1.119772555 | 0% | (0.23) |  |

|                  |              |              |        |                                                                                                                                                                                                              |         |       |     |    |    |    |    |    |    |    |    |    |    |             |           |
|------------------|--------------|--------------|--------|--------------------------------------------------------------------------------------------------------------------------------------------------------------------------------------------------------------|---------|-------|-----|----|----|----|----|----|----|----|----|----|----|-------------|-----------|
| ADA10_HUMAN      | VDAC2_HUMAN  | VDAC2        | P45880 | Voltage-dependent anion-selective channel protein 2 (VDAC-2) (hVDAC2) (Outer mitochondrial membrane protein porin 2)                                                                                         | 32 kDa  | 0.068 | 143 | 71 | 71 | 19 | 14 | 17 | 20 | 17 | 21 | 18 | 15 | 1.119729439 | 0% (0.27) |
| SORL1_HUMAN      | NDUS3_HUMAN  | NDUFS3       | O75489 | NADH dehydrogenase [ubiquinone] iron-sulfur protein 3, mitochondrial (EC 1.6.5.3) (EC 1.6.99.3) (Complex I-30kD) (CI-30kD) (NADH-ubiquinone oxidoreductase 30 kDa subunit)                                   | 30 kDa  | 0.056 | 142 | 71 | 71 | 27 | 15 | 11 | 20 | 20 | 15 | 18 | 18 | 1.119729439 | 0% (0.27) |
| NAT10_HUMAN      | Q6PJ75_HUMAN | ITGB2        | Q6PJ75 | Integrin beta (Fragment)                                                                                                                                                                                     | 84 kDa  | 0.11  | 126 | 63 | 63 | 12 | 25 | 19 | 7  | 0  | 12 | 20 | 31 | 1.119715648 | 0% (0.28) |
| NAKD2_HUMAN      | NB5R1_HUMAN  | CYB5R1       | Q9UHQ9 | NADH-cytochrome b5 reductase 1 (b5R.1) (EC 1.6.2.2) (Humb5R2) (NAD(P)H:ubiquinone oxidoreductase type 3 polypeptide A2)                                                                                      | 34 kDa  | 0.15  | 125 | 63 | 63 | 28 | 8  | 8  | 20 | 3  | 21 | 14 | 26 | 1.119715648 | 0% (0.28) |
| DDX47_HUMAN(+1)  | VPS35_HUMAN  | VPS35        | Q96QK1 | Vacuolar protein sorting-associated protein 35 (hVPS35) (Maternal-embryonic 3) (Vesicle protein sorting 35)                                                                                                  | 92 kDa  | 0.14  | 120 | 60 | 60 | 10 | 12 | 20 | 18 | 14 | 18 | 16 | 12 | 1.119710478 | 0% (0.29) |
| B2R6X6_HUMAN(+1) | RS2_HUMAN    | RPS2         | P15880 | 40S ribosomal protein S2 (40S ribosomal protein S4) (Protein L1.Rep3)                                                                                                                                        | 31 kDa  | 0.14  | 108 | 55 | 55 | 10 | 15 | 12 | 18 | 15 | 23 | 8  | 8  | 1.119701861 | 0% (0.30) |
| D3DUE6_HUMAN(+1) | NDUA9_HUMAN  | NDUFA9       | Q16795 | NADH dehydrogenase [ubiquinone] 1 alpha subcomplex subunit 9, mitochondrial (Complex I-39kD) (CI-39kD) (NADH-ubiquinone oxidoreductase 39 kDa subunit)                                                       | 43 kDa  | 0.11  | 108 | 54 | 54 | 24 | 10 | 8  | 12 | 14 | 6  | 18 | 16 | 1.119700138 | 0% (0.30) |
| IF2M_HUMAN       | ATLA3_HUMAN  | ATL3         | Q6DD88 | Atlantin-3 (EC 3.6.5.-)                                                                                                                                                                                      | 61 kDa  | 0.13  | 98  | 49 | 49 | 20 | 9  | 5  | 15 | 7  | 11 | 12 | 18 | 1.119691523 | 0% (0.32) |
| ARPI0_HUMAN(+4)  | PLOD2_HUMAN  | PLOD2        | O00469 | Procollagen-lysine,2-oxoglutarate 5-dioxygenase 2 (EC 1.14.11.4) (Lysyl hydroxylase 2) (LH2)                                                                                                                 | 85 kDa  | 0.058 | 92  | 46 | 46 | 7  | 19 | 18 | 2  | 9  | 6  | 17 | 15 | 1.119686354 | 0% (0.32) |
| SEP15_HUMAN      | ITAM_HUMAN   | ITGAM        | P11215 | Integrin alpha-M (CD11 antigen-like family member B) (CR-3 alpha chain) (Cell surface glycoprotein MAC-1 subunit alpha) (Leukocyte adhesion receptor MO1) (Neutrophil adherence receptor) (CD antigen CD11b) | 127 kDa | 0.25  | 90  | 45 | 45 | 9  | 15 | 17 | 4  | 0  | 3  | 18 | 24 | 1.119684631 | 0% (0.33) |
| SPRY4_HUMAN      | AT1B3_HUMAN  | ATP1B3       | P54709 | Sodium/potassium-transporting ATPase subunit beta-3 (Sodium/potassium-dependent ATPase subunit beta-3) (ATPB-3) (CD antigen CD298)                                                                           | 32 kDa  | 0.28  | 72  | 36 | 36 | 7  | 10 | 10 | 10 | 10 | 9  | 7  | 10 | 1.119669129 | 0% (0.35) |
| B2R7B5_HUMAN     | PCBP1_HUMAN  | PCBP1        | Q15365 | Poly(rC)-binding protein 1 (Alpha-CP1) (Heterogeneous nuclear ribonucleoprotein E1) (hnRNP E1) (Nucleic acid-binding protein SUB2.3)                                                                         | 37 kDa  | 0.032 | 63  | 31 | 31 | 5  | 9  | 7  | 10 | 10 | 9  | 8  | 5  | 1.119660518 | 0% (0.37) |
| SYNM_HUMAN       | SYNC_HUMAN   | NARS         | O43776 | Asparagine--tRNA ligase, cytoplasmic (EC 6.1.1.22) (Asparaginyl-tRNA synthetase) (AsnRS)                                                                                                                     | 63 kDa  | 0.14  | 54  | 27 | 27 | 1  | 8  | 6  | 12 | 10 | 12 | 5  | 1  | 1.11965363  | 0% (0.38) |
| CQ062_HUMAN(+2)  | ACTZ_HUMAN   | ACTR1A       | P61163 | Alpha-centractin (Centractin) (ARPI) (Actin-RPV) (Centrosome-associated actin homologue)                                                                                                                     | 43 kDa  | 0.25  | 54  | 27 | 27 | 5  | 10 | 6  | 6  | 4  | 11 | 6  | 6  | 1.11965363  | 0% (0.38) |
| A8K6A7_HUMAN(+3) | C9JNW5_HUMAN | RPL24        | C9JNW5 | 60S ribosomal protein L24 (Ribosomal protein L24, isoform CRA_e)                                                                                                                                             | 18 kDa  | 0.1   | 52  | 26 | 26 | 5  | 7  | 5  | 9  | 8  | 8  | 4  | 6  | 1.119651909 | 0% (0.39) |
| D3YTBI_HUMAN(+2) | Q7KZ24_HUMAN |              | Q7KZ24 | Nuclease sensitive element binding protein-1                                                                                                                                                                 | 35 kDa  | 0.41  | 51  | 26 | 26 | 1  | 11 | 12 | 2  | 9  | 2  | 8  | 7  | 1.119651909 | 0% (0.39) |
| B2RAF9_HUMAN(+1) | Q658S9_HUMAN | DKFZp6661134 | Q658S9 | Putative uncharacterized protein DKFZp6661134 (Fragment)                                                                                                                                                     | 44 kDa  | 0.083 | 50  | 25 | 25 | 6  | 7  | 6  | 5  | 4  | 10 | 5  | 6  | 1.119650187 | 0% (0.39) |
| B2RCX0_HUMAN     | E5RI99_HUMAN | RPL30        | E5RI99 | 60S ribosomal protein L30 (Fragment)                                                                                                                                                                         | 13 kDa  | 0.17  | 50  | 25 | 25 | 6  | 4  | 6  | 9  | 6  | 7  | 7  | 5  | 1.119650187 | 0% (0.39) |

|                   |              |        |        |                                                                                                                                                                                                                                                                                                                                                                                                                                        |         |       |    |    |    |    |   |    |   |    |    |    |   |             |           |
|-------------------|--------------|--------|--------|----------------------------------------------------------------------------------------------------------------------------------------------------------------------------------------------------------------------------------------------------------------------------------------------------------------------------------------------------------------------------------------------------------------------------------------|---------|-------|----|----|----|----|---|----|---|----|----|----|---|-------------|-----------|
| PXDN_HUMAN        | SYG_HUMAN    | GARS   | P41250 | Glycine-tRNA ligase (EC 6.1.1.14) (Diadenosine tetraphosphate synthetase) (AP-4-A synthetase) (Glycyl-tRNA synthetase) (GlyRS)                                                                                                                                                                                                                                                                                                         | 83 kDa  | 0.1   | 50 | 25 | 25 | 4  | 7 | 7  | 7 | 5  | 14 | 3  | 3 | 1.119650187 | 0% (0.39) |
| CTLI_HUMAN        | PRSI0_HUMAN  | PSMC6  | P62333 | 26S protease regulatory subunit 10B (26S proteasome AAA-ATPase subunit RPT4) (Proteasome 26S subunit ATPase 6) (Proteasome subunit p42)                                                                                                                                                                                                                                                                                                | 44 kDa  | 0.11  | 50 | 25 | 25 | 3  | 7 | 7  | 8 | 6  | 11 | 5  | 3 | 1.119650187 | 0% (0.39) |
| B2RBB2_HUMAN (+2) | B7Z7X8_HUMAN | ATL2   | B7Z7X8 | Atlastin-2 (cDNA FLJ51152, highly similar to Homo sapiens ADP-ribosylation factor-like 6 interacting protein 2 (ARL6IP2), mRNA)                                                                                                                                                                                                                                                                                                        | 65 kDa  | 0.15  | 47 | 24 | 24 | 10 | 4 | 2  | 8 | 5  | 5  | 7  | 7 | 1.119648465 | 0% (0.40) |
| B3KNC3_HUMAN      | Q0VAB1_HUMAN | TIMM50 | Q0VAB1 | Translocase of inner mitochondrial membrane 50 homolog (S. cerevisiae)                                                                                                                                                                                                                                                                                                                                                                 | 50 kDa  | 0.12  | 46 | 23 | 23 | 8  | 2 | 6  | 7 | 8  | 1  | 7  | 8 | 1.119646744 | 0% (0.40) |
| CBPD_HUMAN        | DDX18_HUMAN  | DDX18  | Q9NVP1 | ATP-dependent RNA helicase DDX18 (EC 3.6.4.13) (DEAD box protein 18) (Myc-regulated DEAD box protein) (MrDb)                                                                                                                                                                                                                                                                                                                           | 75 kDa  | 0.075 | 44 | 22 | 22 | 3  | 9 | 4  | 8 | 3  | 3  | 9  | 7 | 1.119645022 | 0% (0.40) |
| H0YL69_HUMAN (+2) | B0QZ18_HUMAN | CPNE1  | B0QZ18 | Copine-1 (HCG38213, isoform CRA_b)                                                                                                                                                                                                                                                                                                                                                                                                     | 60 kDa  | 0.24  | 44 | 22 | 22 | 4  | 7 | 7  | 4 | 10 | 3  | 5  | 4 | 1.119645022 | 0% (0.40) |
| J3KQ48_HUMAN (+2) | 1433F_HUMAN  | YWHAH  | Q04917 | 14-3-3 protein eta (Protein AS1)                                                                                                                                                                                                                                                                                                                                                                                                       | 28 kDa  | 0.21  | 42 | 21 | 21 | 0  | 6 | 6  | 5 | 0  | 4  | 5  | 0 | 1.1196433   | 0% (0.41) |
| IMA5_HUMAN (+1)   | SF3A1_HUMAN  | SF3A1  | Q15459 | Splicing factor 3A subunit 1 (SF3A120) (Spliceosome-associated protein 114) (SAP114)                                                                                                                                                                                                                                                                                                                                                   | 89 kDa  | 0.16  | 40 | 20 | 20 | 1  | 5 | 11 | 3 | 2  | 0  | 11 | 7 | 1.119641579 | 0% (0.41) |
| CECR5_HUMAN       | NSMA3_HUMAN  | SMPD4  | Q9NXE4 | Sphingomyelin phosphodiesterase 4 (EC 3.1.4.12) (Neutral sphingomyelinase 3) (nSMase-3) (nSMase3) (Neutral sphingomyelinase III)                                                                                                                                                                                                                                                                                                       | 93 kDa  | 0.14  | 41 | 20 | 20 | 6  | 5 | 2  | 7 | 6  | 5  | 3  | 6 | 1.119641579 | 0% (0.41) |
| A8K6V6_HUMAN (+4) | STXB3_HUMAN  | STXBP3 | O00186 | Syntaxin-binding protein 3 (Platelet Sec1 protein) (PSP) (Protein unc-18 homolog 3) (Unc18-3) (Protein unc-18 homolog C) (Unc-18C)                                                                                                                                                                                                                                                                                                     | 68 kDa  | 0.12  | 39 | 20 | 20 | 5  | 5 | 5  | 5 | 6  | 2  | 6  | 7 | 1.119641579 | 0% (0.41) |
| I3L397_HUMAN (+2) | MBOA7_HUMAN  | MBOAT7 | Q96N66 | Lysophospholipid acyltransferase 7 (LPLAT 7) (EC 2.3.1.-) (1-acylglycerophosphatidylinositol O-acyltransferase) (EC 2.3.1.n4) (Bladder and breast carcinoma-overexpressed gene 1 protein) (Leukocyte receptor cluster member 4) (Lysophosphatidylinositol acyltransferase) (LPIAT) (Lyso-PI acyltransferase) (Membrane-bound O-acyltransferase domain-containing protein 7) (O-acyltransferase domain-containing protein 7) (h-mboa-7) | 53 kDa  | 0.17  | 37 | 19 | 19 | 4  | 4 | 4  | 7 | 4  | 5  | 4  | 6 | 1.119639857 | 0% (0.42) |
| RB12B_HUMAN       | B4DRV2_HUMAN |        | B4DRV2 | cDNA FLJ53646, highly similar to Succinyl-CoA ligase (ADP-forming) beta-chain, mitochondrial (EC 6.2.1.5)                                                                                                                                                                                                                                                                                                                              | 44 kDa  | 0.063 | 36 | 18 | 18 | 7  | 3 | 5  | 4 | 10 | 3  | 1  | 4 | 1.119638136 | 0% (0.43) |
| I1SRCS_HUMAN      | A8K529_HUMAN |        | A8K529 | cDNA FLJ76184, highly similar to Homo sapiens NOL1/NOP2/Sun domain family, member 2 (NSUN2), mRNA                                                                                                                                                                                                                                                                                                                                      | 86 kDa  | 0.14  | 36 | 18 | 18 | 0  | 7 | 9  | 2 | 8  | 3  | 5  | 2 | 1.119638136 | 0% (0.43) |
| STING_HUMAN       | B7ZL00_HUMAN | SEC31A | B7ZL00 | Protein transport protein Sec31A (SEC31A protein)                                                                                                                                                                                                                                                                                                                                                                                      | 128 kDa | 0.14  | 34 | 17 | 17 | 7  | 4 | 2  | 4 | 1  | 8  | 2  | 6 | 1.119636415 | 0% (0.43) |
| B4DU42_HUMAN (+1) | RL3_HUMAN    | RPL3   | P39023 | 60S ribosomal protein L3 (HIV-1 TAR RNA-binding protein B) (TARBP-B)                                                                                                                                                                                                                                                                                                                                                                   | 46 kDa  | 0.09  | 34 | 17 | 17 | 0  | 3 | 7  | 7 | 8  | 3  | 3  | 3 | 1.119636415 | 0% (0.43) |
| PGLT1_HUMAN       | E7ENA9_HUMAN | NCSTN  | E7ENA9 | Nicastrin                                                                                                                                                                                                                                                                                                                                                                                                                              | 50 kDa  | 0.17  | 34 | 17 | 17 | 7  | 4 | 4  | 3 | 5  | 4  | 3  | 5 | 1.119636415 | 0% (0.43) |
| DHR53_HUMAN (+1)  | KCY_HUMAN    | CMPK1  | P30085 | UMP-CMP kinase (EC 2.7.4.14) (Deoxycytidylylate                                                                                                                                                                                                                                                                                                                                                                                        | 22 kDa  | 0.2   | 34 | 17 | 17 | 0  | 5 | 6  | 6 | 8  | 5  | 4  | 0 | 1.119636415 | 0% (0.43) |

|                   |              |         |        |                                                                                                                                                                                                                                                                                                                                                                     |        |       |    |    |    |   |   |   |    |   |    |   |   |                 |              |
|-------------------|--------------|---------|--------|---------------------------------------------------------------------------------------------------------------------------------------------------------------------------------------------------------------------------------------------------------------------------------------------------------------------------------------------------------------------|--------|-------|----|----|----|---|---|---|----|---|----|---|---|-----------------|--------------|
|                   |              |         |        | kinase) (CK) (dCMP kinase)<br>(Nucleoside-diphosphate<br>kinase) (EC 2.7.4.6) (Uridine<br>monophosphate/cytidine<br>monophosphate kinase)<br>(UMP/CMP kinase)<br>(UMP/CMPK)                                                                                                                                                                                         |        |       |    |    |    |   |   |   |    |   |    |   |   |                 |              |
| A8K454_HUMAN      | B7ZKK7_HUMAN | EIF2AK2 | B7ZKK7 | EIF2AK2 protein                                                                                                                                                                                                                                                                                                                                                     | 62 kDa | 0.1   | 34 | 17 | 17 | 0 | 2 | 3 | 12 | 6 | 6  | 3 | 2 | 1.1196364<br>15 | 0%<br>(0.43) |
| ACL6A_HUMAN (+1)  | PTCD3_HUMAN  | PTCD3   | Q96EY7 | Pentatricopeptide repeat<br>domain-containing protein 3,<br>mitochondrial (28S ribosomal<br>protein S39, mitochondrial)<br>(MRP-S39) (Transformation-<br>related gene 15 protein) (TRG-<br>15)                                                                                                                                                                      | 79 kDa | 0.12  | 32 | 16 | 16 | 8 | 3 | 1 | 4  | 8 | 1  | 2 | 5 | 1.1196346<br>93 | 0%<br>(0.44) |
| XPP1_HUMAN        | Q53HJ4_HUMAN |         | Q53HJ4 | Minichromosome maintenance<br>protein 3 variant (Fragment)                                                                                                                                                                                                                                                                                                          | 91 kDa | 0.095 | 30 | 15 | 15 | 0 | 9 | 6 | 0  | 7 | 4  | 4 | 0 | 1.1196329<br>72 | 0%<br>(0.44) |
| PSMD8_HUMAN       | IMA3_HUMAN   | KPNA4   | O00629 | Importin subunit alpha-3<br>(Importin alpha Q1) (Qip1)<br>(Karyopherin subunit alpha-4)                                                                                                                                                                                                                                                                             | 58 kDa | 0.15  | 30 | 15 | 15 | 2 | 4 | 6 | 3  | 5 | 2  | 5 | 3 | 1.1196329<br>72 | 0%<br>(0.44) |
| MNDA_HUMAN        | CAZA2_HUMAN  | CAPZA2  | P47755 | F-actin-capping protein<br>subunit alpha-2 (CapZ alpha-<br>2)                                                                                                                                                                                                                                                                                                       | 33 kDa | 0.23  | 31 | 15 | 15 | 3 | 4 | 5 | 3  | 4 | 2  | 4 | 5 | 1.1196329<br>72 | 0%<br>(0.44) |
| A8K6A5_HUMAN (+2) | Q59GW5_HUMAN |         | Q59GW5 | Tripartite motif-containing 25<br>variant (Fragment)                                                                                                                                                                                                                                                                                                                | 72 kDa | 0.078 | 28 | 14 | 14 | 1 | 4 | 5 | 4  | 2 | 10 | 2 | 0 | 1.1196312<br>51 | 0%<br>(0.45) |
| MYO1B_HUMAN       | CSK22_HUMAN  | CSNK2A2 | P19784 | Casein kinase II subunit alpha'<br>(CK II alpha') (EC 2.7.11.1)                                                                                                                                                                                                                                                                                                     | 41 kDa | 0.12  | 28 | 14 | 14 | 1 | 5 | 4 | 4  | 4 | 1  | 9 | 1 | 1.1196312<br>51 | 0%<br>(0.45) |
| J3QRS3_HUMAN      | RM19_HUMAN   | MRPL19  | P49406 | 39S ribosomal protein L19,<br>mitochondrial (L19mt) (MRP-<br>L19) (39S ribosomal protein<br>L15, mitochondrial) (L15mt)<br>(MRP-L15)                                                                                                                                                                                                                                | 34 kDa | 0.18  | 26 | 13 | 13 | 6 | 2 | 3 | 2  | 5 | 0  | 3 | 5 | 1.1196295<br>3  | 0%<br>(0.46) |
| IMA3_HUMAN        | F5H5P2_HUMAN | BCKDHA  | F5H5P2 | 2-oxoisovalerate<br>dehydrogenase subunit alpha,<br>mitochondrial<br>(Uncharacterized protein)                                                                                                                                                                                                                                                                      | 54 kDa | 0.12  | 26 | 13 | 13 | 8 | 1 | 2 | 2  | 3 | 4  | 2 | 4 | 1.1196295<br>3  | 0%<br>(0.46) |
| PSDE_HUMAN        | G3V2S6_HUMAN | ATP6V1D | G3V2S6 | V-type proton ATPase subunit<br>D                                                                                                                                                                                                                                                                                                                                   | 22 kDa | 0.16  | 26 | 13 | 13 | 4 | 3 | 4 | 2  | 0 | 2  | 3 | 8 | 1.1196295<br>3  | 0%<br>(0.46) |
| B2R739_HUMAN      | C9JJ19_HUMAN | MRPS34  | C9JJ19 | 28S ribosomal protein S34,<br>mitochondrial                                                                                                                                                                                                                                                                                                                         | 26 kDa | 0.33  | 24 | 12 | 12 | 3 | 3 | 3 | 3  | 3 | 3  | 2 | 4 | 1.1196278<br>09 | 0%<br>(0.47) |
| DOU070_HUMAN (+4) | AGAL_HUMAN   | GLA     | P06280 | Alpha-galactosidase A (EC<br>3.2.1.22) (Alpha-D-<br>galactosidase A) (Alpha-D-<br>galactoside galactohydrolase)<br>(Melibiase) (Agalsidase)                                                                                                                                                                                                                         | 49 kDa | 0.06  | 24 | 12 | 12 | 1 | 6 | 5 | 0  | 1 | 2  | 1 | 8 | 1.1196278<br>09 | 0%<br>(0.47) |
| MARH5_HUMAN       | MK01_HUMAN   | MAPK1   | P28482 | Mitogen-activated protein<br>kinase 1 (MAP kinase 1)<br>(MAPK 1) (EC 2.7.11.24)<br>(ERT1) (Extracellular signal-<br>regulated kinase 2) (ERK-2)<br>(MAP kinase isoform p42)<br>(p42-MAPK) (Mitogen-<br>activated protein kinase 2)<br>(MAP kinase 2) (MAPK 2)                                                                                                       | 41 kDa | 0.29  | 23 | 11 | 11 | 0 | 3 | 1 | 7  | 0 | 7  | 4 | 0 | 1.1196260<br>88 | 0%<br>(0.47) |
| NAGK_HUMAN        | HINT2_HUMAN  | HINT2   | Q9BX68 | Histidine triad nucleotide-<br>binding protein 2,<br>mitochondrial (HINT-2) (EC<br>3.-.-.-) (HINT-3) (HIT-17kDa)<br>(PKCI-1-related HIT protein)                                                                                                                                                                                                                    | 17 kDa | 0.3   | 22 | 11 | 11 | 2 | 5 | 2 | 2  | 2 | 2  | 2 | 4 | 1.1196260<br>88 | 0%<br>(0.47) |
| STX7_HUMAN        | ALG2_HUMAN   | ALG2    | Q9H553 | Alpha-1,3/1,6-<br>mannosyltransferase ALG2<br>(EC 2.4.1.132) (EC 2.4.1.257)<br>(Asparagine-linked<br>glycosylation protein 2<br>homolog) (GDP-<br>Man:Man(1)GlcNAc(2)-PP-<br>Dol alpha-1,3-<br>mannosyltransferase) (GDP-<br>Man:Man(1)GlcNAc(2)-PP-<br>dolichol mannosyltransferase)<br>(GDP-<br>Man:Man(2)GlcNAc(2)-PP-<br>Dol alpha-1,6-<br>mannosyltransferase) | 47 kDa | 0.16  | 23 | 11 | 11 | 5 | 2 | 3 | 1  | 1 | 0  | 4 | 6 | 1.1196260<br>88 | 0%<br>(0.47) |
| RASL1_HUMAN       | DNJA2_HUMAN  | DNAJA2  | O60884 | DnaJ homolog subfamily A<br>member 2 (Cell cycle<br>progression restoration gene 3<br>protein) (Dnj3) (Dj3) (HIRA-                                                                                                                                                                                                                                                  | 46 kDa | 0.17  | 19 | 10 | 10 | 2 | 3 | 1 | 4  | 5 | 4  | 1 | 0 | 1.1196243<br>67 | 0%<br>(0.48) |

|                   |              |        |        |                                                                                                                                                                                                                                                                                                                                                                                                                                                                                                                                                              |        |       |    |    |    |   |   |   |   |   |   |   |   |   |             |             |        |        |  |  |  |
|-------------------|--------------|--------|--------|--------------------------------------------------------------------------------------------------------------------------------------------------------------------------------------------------------------------------------------------------------------------------------------------------------------------------------------------------------------------------------------------------------------------------------------------------------------------------------------------------------------------------------------------------------------|--------|-------|----|----|----|---|---|---|---|---|---|---|---|---|-------------|-------------|--------|--------|--|--|--|
|                   |              |        |        |                                                                                                                                                                                                                                                                                                                                                                                                                                                                                                                                                              |        |       |    |    |    |   |   |   |   |   |   |   |   |   |             |             |        |        |  |  |  |
|                   |              |        |        | interacting protein 4) (Renal carcinoma antigen NY-REN-14)                                                                                                                                                                                                                                                                                                                                                                                                                                                                                                   |        |       |    |    |    |   |   |   |   |   |   |   |   |   |             |             |        |        |  |  |  |
| NDUAA_HUMAN       | ICT1_HUMAN   | ICT1   | Q14197 | Peptidyl-tRNA hydrolase ICT1, mitochondrial (EC 3.1.1.29) (39S ribosomal protein L58, mitochondrial) (MRP-L58) (Digestion substraction 1) (DS-1) (Immature colon carcinoma transcript 1 protein)                                                                                                                                                                                                                                                                                                                                                             | 24 kDa | 0.12  | 20 | 10 | 10 | 3 | 5 | 1 | 1 | 4 | 2 | 2 | 2 | 2 |             | 1.119624367 | 0%     | (0.48) |  |  |  |
| RAB5B_HUMAN       | IMA4_HUMAN   | KPNA3  | O00505 | Importin subunit alpha-4 (Importin alpha Q2) (Qip2) (Karyopherin subunit alpha-3) (SRP1-gamma)                                                                                                                                                                                                                                                                                                                                                                                                                                                               | 58 kDa | 0.33  | 20 | 10 | 10 | 0 | 3 | 5 | 0 | 4 | 0 | 3 | 2 | 2 |             | 1.119624367 | 0%     | (0.48) |  |  |  |
| CB047_HUMAN       | A8K968_HUMAN |        | A8K968 | cDNA FLJ77757                                                                                                                                                                                                                                                                                                                                                                                                                                                                                                                                                | 85 kDa | 0.19  | 18 | 9  | 9  | 0 | 5 | 4 | 0 | 0 | 1 | 2 | 6 |   | 1.119622646 | 0%          | (0.49) |        |  |  |  |
| RAP1B_HUMAN       | ERH_HUMAN    | ERH    | P84090 | Enhancer of rudimentary homolog                                                                                                                                                                                                                                                                                                                                                                                                                                                                                                                              | 12 kDa | 0.42  | 18 | 9  | 9  | 1 | 1 | 4 | 3 | 2 | 1 | 4 | 2 |   | 1.119622646 | 0%          | (0.49) |        |  |  |  |
| A8K0T9_HUMAN (+1) | LPCT4_HUMAN  | LPCAT4 | Q643R3 | Lysophospholipid acyltransferase LPCAT4 (1-acylglycerol-3-phosphate O-acyltransferase 7) (1-AGP acyltransferase 7) (1-AGPAT 7) (1-acylglycerophosphocholine O-acyltransferase) (EC 2.3.1.23) (1-acylglycerophosphoserine O-acyltransferase) (EC 2.3.1.n6) (1-alkenylglycerophosphoethanolamine O-acyltransferase) (EC 2.3.1.121) (1-alkylglycerophosphocholine O-acetyltransferase) (EC 2.3.1.67) (Acyltransferase-like 3) (Lysophosphatidylcholine acyltransferase 4) (Lysophosphatidylethanolamine acyltransferase 2) (EC 2.3.1.n7) (Plasmalogen synthase) | 57 kDa | 0.24  | 18 | 9  | 9  | 5 | 1 | 2 | 1 | 0 | 1 | 3 | 5 |   |             | 1.119622646 | 0%     | (0.49) |  |  |  |
| OXSRI_HUMAN       | NDUA5_HUMAN  | NDUFA5 | Q16718 | NADH dehydrogenase [ubiquinone] 1 alpha subcomplex subunit 5 (Complex I subunit B13) (Complex I-13kD-B) (CI-13kD-B) (NADH-ubiquinone oxidoreductase 13 kDa-B subunit)                                                                                                                                                                                                                                                                                                                                                                                        | 13 kDa | 0.14  | 18 | 9  | 9  | 5 | 1 | 1 | 2 | 3 | 2 | 2 | 2 |   | 1.119622646 | 0%          | (0.49) |        |  |  |  |
| B7Z1V4_HUMAN (+2) | PGAM5_HUMAN  | PGAM5  | Q96HS1 | Serine/threonine-protein phosphatase PGAM5, mitochondrial (EC 3.1.3.16) (Bcl-XL-binding protein v68) (Phosphoglycerate mutase family member 5)                                                                                                                                                                                                                                                                                                                                                                                                               | 32 kDa | 0.12  | 16 | 8  | 8  | 4 | 3 | 1 | 0 | 7 | 0 | 1 | 0 |   | 1.119620925 | 0%          | (0.50) |        |  |  |  |
| RUXE_HUMAN        | B2RCZ4_HUMAN |        | B2RCZ4 | cDNA, FLJ96384, highly similar to Homo sapiens protein kinase C, iota (PRKCI), mRNA                                                                                                                                                                                                                                                                                                                                                                                                                                                                          | 67 kDa | 0.29  | 16 | 8  | 8  | 0 | 3 | 2 | 3 | 1 | 2 | 1 | 4 |   | 1.119620925 | 0%          | (0.50) |        |  |  |  |
| RS20_HUMAN        | LMF2_HUMAN   | LMF2   | Q9BU23 | Lipase maturation factor 2 (Transmembrane protein 112B) (Transmembrane protein 153)                                                                                                                                                                                                                                                                                                                                                                                                                                                                          | 80 kDa | 0.19  | 16 | 8  | 8  | 4 | 2 | 2 | 0 | 2 | 1 | 4 | 1 |   | 1.119620925 | 0%          | (0.50) |        |  |  |  |
| B4E2Q0_HUMAN      | B7Z7P8_HUMAN | ETF1   | B7Z7P8 | Eukaryotic peptide chain release factor subunit 1 (cDNA FLJ56175, highly similar to Eukaryotic peptide chain release factor subunit 1)                                                                                                                                                                                                                                                                                                                                                                                                                       | 47 kDa | 0.082 | 17 | 8  | 8  | 1 | 2 | 0 | 6 | 3 | 2 | 2 | 1 |   | 1.119620925 | 0%          | (0.50) |        |  |  |  |
| PSME3_HUMAN       | DPP3_HUMAN   | DPP3   | Q9NY33 | Dipeptidyl peptidase 3 (EC 3.4.14.4) (Dipeptidyl aminopeptidase III) (Dipeptidyl arylamidase III) (Dipeptidyl peptidase III) (DPP III) (Enkephalinase B)                                                                                                                                                                                                                                                                                                                                                                                                     | 83 kDa | 0.2   | 16 | 8  | 8  | 2 | 0 | 2 | 4 | 2 | 0 | 5 | 1 |   | 1.119620925 | 0%          | (0.50) |        |  |  |  |
| SON_HUMAN         | H3BSH7_HUMAN | CIRH1A | H3BSH7 | Cirhin (Fragment)                                                                                                                                                                                                                                                                                                                                                                                                                                                                                                                                            | 78 kDa | 0.035 | 16 | 8  | 8  | 1 | 3 | 2 | 2 | 5 | 0 | 1 | 2 |   | 1.119620925 | 0%          | (0.50) |        |  |  |  |
| AAAT_HUMAN (+2)   | EMC7_HUMAN   | EMC7   | Q9NPA0 | ER membrane protein complex subunit 7                                                                                                                                                                                                                                                                                                                                                                                                                                                                                                                        | 26 kDa | 0.11  | 15 | 8  | 8  | 2 | 2 | 2 | 1 | 0 | 4 | 3 | 2 |   | 1.119620925 | 0%          | (0.50) |        |  |  |  |

|                   |              |         |        |                                                                                                                                                                                   |         |        |    |   |   |   |   |   |   |   |   |   |   |             |           |
|-------------------|--------------|---------|--------|-----------------------------------------------------------------------------------------------------------------------------------------------------------------------------------|---------|--------|----|---|---|---|---|---|---|---|---|---|---|-------------|-----------|
| Q53GD1_HUMAN      | B3KQN7_HUMAN |         | B3KQN7 | cDNA FLJ90789 fis, clone THYRO1001523, highly similar to G-protein coupled receptor 56                                                                                            | 77 kDa  | 0.25   | 16 | 8 | 8 | 3 | 4 | 1 | 0 | 3 | 0 | 3 | 2 | 1.119620925 | 0% (0.50) |
| Q53GS0_HUMAN      | B3KSE0_HUMAN |         | B3KSE0 | cDNA FLJ36069 fis, clone TEST12019406, highly similar to HEME OXYGENASE 2 (EC 1.14.99.3)                                                                                          | 36 kDa  | 0.13   | 16 | 8 | 8 | 6 | 0 | 1 | 1 | 1 | 1 | 2 | 4 | 1.119620925 | 0% (0.50) |
| HPCL1_HUMAN       | ATAD1_HUMAN  | ATAD1   | Q8NBU5 | ATPase family AAA domain-containing protein 1 (EC 3.6.1.3) (Thorase)                                                                                                              | 41 kDa  | 0.38   | 16 | 8 | 8 | 2 | 1 | 1 | 4 | 2 | 1 | 2 | 3 | 1.119620925 | 0% (0.50) |
| PERM_HUMAN        | NFU1_HUMAN   | NFU1    | Q9UMS0 | NFU1 iron-sulfur cluster scaffold homolog, mitochondrial (HIRA-interacting protein 5)                                                                                             | 28 kDa  | 0.14   | 16 | 8 | 8 | 3 | 1 | 2 | 2 | 4 | 1 | 1 | 2 | 1.119620925 | 0% (0.50) |
| CLPP_HUMAN        | PRAF1_HUMAN  | RABAC1  | Q9UI14 | Prenylated Rab acceptor protein 1 (PRA1 family protein 1)                                                                                                                         | 21 kDa  | 0.17   | 15 | 7 | 7 | 1 | 4 | 0 | 2 | 1 | 2 | 2 | 2 | 1.119619204 | 0% (0.52) |
| B4E2S7_HUMAN      | NOP9_HUMAN   | NOP9    | Q86U38 | Nucleolar protein 9                                                                                                                                                               | 69 kDa  | 0.08   | 14 | 7 | 7 | 0 | 1 | 2 | 4 | 2 | 2 | 2 | 1 | 1.119619204 | 0% (0.52) |
| CHL1_HUMAN        | B4DZJ7_HUMAN |         | B4DZJ7 | Transcription elongation factor SPT5                                                                                                                                              | 118 kDa | 0.33   | 14 | 7 | 7 | 0 | 3 | 2 | 2 | 3 | 0 | 1 | 3 | 1.119619204 | 0% (0.52) |
| B2RBD5_HUMAN (+1) | B3KQ18_HUMAN |         | B3KQ18 | cDNA FLJ32632 fis, clone SYNOV1000190, highly similar to Alpha-1,3-mannosyl-glycoprotein2-beta-N-acetylglucosaminyltransferase (EC 2.4.1.101)                                     | 51 kDa  | 0.41   | 14 | 7 | 7 | 1 | 1 | 1 | 4 | 2 | 0 | 1 | 4 | 1.119619204 | 0% (0.52) |
| CD47_HUMAN        | SNAG_HUMAN   | NAPG    | Q99747 | Gamma-soluble NSF attachment protein (SNAP-gamma) (N-ethylmaleimide-sensitive factor attachment protein gamma)                                                                    | 35 kDa  | 0.084  | 14 | 7 | 7 | 2 | 2 | 2 | 1 | 3 | 0 | 2 | 2 | 1.119619204 | 0% (0.52) |
| E7EQT4_HUMAN      | CSK2B_HUMAN  | CSNK2B  | P67870 | Casein kinase II subunit beta (CK II beta) (Phosvitin) (Protein G5a)                                                                                                              | 25 kDa  | 0.048  | 14 | 7 | 7 | 0 | 2 | 2 | 3 | 2 | 3 | 2 | 0 | 1.119619204 | 0% (0.52) |
| ARL1_HUMAN (+1)   | TMED5_HUMAN  | TMED5   | Q9Y3A6 | Transmembrane emp24 domain-containing protein 5 (p24 family protein gamma-2) (p24gamma2) (p28)                                                                                    | 26 kDa  | 0.28   | 14 | 7 | 7 | 2 | 1 | 0 | 4 | 1 | 4 | 1 | 1 | 1.119619204 | 0% (0.52) |
| CATZ_HUMAN (+1)   | TMED1_HUMAN  | TMED1   | Q13445 | Transmembrane emp24 domain-containing protein 1 (Interleukin-1 receptor-like 1 ligand) (Putative T1/ST2 receptor-binding protein) (p24 family protein gamma-1) (Tp24) (p24gamma1) | 25 kDa  | 0.13   | 14 | 7 | 7 | 2 | 1 | 1 | 3 | 2 | 2 | 1 | 2 | 1.119619204 | 0% (0.52) |
| CSK22_HUMAN       | B7ZA00_HUMAN |         | B7ZA00 | cDNA, FLJ79014, highly similar to cAMP-dependent protein kinase, beta-catalytic subunit (EC 2.7.1.11)                                                                             | 36 kDa  | 0.2    | 12 | 6 | 6 | 0 | 1 | 2 | 3 | 1 | 4 | 2 | 0 | 1.119617483 | 0% (0.53) |
| A8K566_HUMAN (+4) | RBM25_HUMAN  | RBM25   | P49756 | RNA-binding protein 25 (Arg/Glu/Asp-rich protein of 120 kDa) (RED120) (Protein S164) (RNA-binding motif protein 25) (RNA-binding region-containing protein 7)                     | 100 kDa | 0.11   | 10 | 5 | 5 | 1 | 3 | 1 | 0 | 1 | 0 | 3 | 1 | 1.119615762 | 0% (0.55) |
| GNAQ_HUMAN        | ACAD8_HUMAN  | ACAD8   | Q9UKU7 | Isobutyryl-CoA dehydrogenase, mitochondrial (EC 1.3.99.-) (Activator-recruited cofactor 42 kDa component) (ARC42) (Acyl-CoA dehydrogenase family member 8) (ACAD-8)               | 45 kDa  | 0.18   | 9  | 5 | 5 | 1 | 1 | 2 | 1 | 3 | 1 | 1 | 0 | 1.119615762 | 0% (0.55) |
| SNTD_HUMAN (+3)   | PSB2_HUMAN   | PSMB2   | P49721 | Proteasome subunit beta type-2 (EC 3.4.25.1) (Macropain subunit C7-1) (Multicatalytic endopeptidase complex subunit C7-1) (Proteasome component C7-1)                             | 23 kDa  | 0.2    | 10 | 5 | 5 | 0 | 2 | 2 | 1 | 1 | 1 | 1 | 2 | 1.119615762 | 0% (0.55) |
| B3KNN9_HUMAN (+1) | CPSF2_HUMAN  | CPSF2   | Q9P2I0 | Cleavage and polyadenylation specificity factor subunit 2 (Cleavage and polyadenylation specificity factor 100 kDa subunit) (CPSF 100 kDa subunit)                                | 88 kDa  | 0.15   | 10 | 5 | 5 | 1 | 1 | 1 | 2 | 0 | 1 | 3 | 1 | 1.119615762 | 0% (0.55) |
| J3KPI4_HUMAN (+1) | S35B2_HUMAN  | SLC35B2 | Q8TB61 | Adenosine 3'-phospho 5'-phosphosulfate transporter 1                                                                                                                              | 48 kDa  | 0.0039 | 10 | 5 | 5 | 3 | 1 | 0 | 1 | 0 | 5 | 0 | 0 | 1.119615762 | 0% (0.55) |





|                   |              |         |        |                                                                                                                                                                                                                     |         |       |   |   |   |   |   |   |   |   |   |   |   |             |           |
|-------------------|--------------|---------|--------|---------------------------------------------------------------------------------------------------------------------------------------------------------------------------------------------------------------------|---------|-------|---|---|---|---|---|---|---|---|---|---|---|-------------|-----------|
| B7Z6F7_HUMAN (+1) | RDH11_HUMAN  | RDH11   | Q8TC12 | Retinol dehydrogenase 11 (EC 1.1.1.300) (Androgen-regulated short-chain dehydrogenase/reductase 1) (HCV core-binding protein HCBP12) (Prostate short-chain dehydrogenase/reductase 1) (Retinal reductase 1) (RalR1) | 35 kDa  | 0.078 | 8 | 4 | 4 | 4 | 0 | 0 | 0 | 0 | 0 | 1 | 3 | 1.119614042 | 0% (0.57) |
| IMPA3_HUMAN       | NELFB_HUMAN  | NELFB   | Q8WX92 | Negative elongation factor B (NELF-B) (Cofactor of BRCA1)                                                                                                                                                           | 66 kDa  | 0.11  | 8 | 4 | 4 | 0 | 2 | 1 | 1 | 1 | 1 | 2 | 0 | 1.119614042 | 0% (0.57) |
| SPRE_HUMAN        | B4DR61_HUMAN | SEC61A1 | B4DR61 | Protein transport protein Sec61 subunit alpha isoform 1 (cDNA FLJ59739, highly similar to Protein transport protein Sec61 subunit alpha isoform 1)                                                                  | 53 kDa  | 0.39  | 8 | 4 | 4 | 2 | 1 | 0 | 1 | 1 | 1 | 1 | 1 | 1.119614042 | 0% (0.57) |
| CADH1_HUMAN (+2)  | DJB12_HUMAN  | DNAJB12 | Q9NXW2 | DnaJ homolog subfamily B member 12                                                                                                                                                                                  | 42 kDa  | 0.088 | 8 | 4 | 4 | 1 | 0 | 1 | 2 | 0 | 1 | 1 | 2 | 1.119614042 | 0% (0.57) |
| PPT1_HUMAN        | A6XND5_HUMAN |         | A6XND5 | Ribonuclease T2                                                                                                                                                                                                     | 36 kDa  | 0.14  | 8 | 4 | 4 | 0 | 1 | 2 | 2 | 0 | 0 | 1 | 3 | 1.119614042 | 0% (0.57) |
| RASN_HUMAN        | NIBAN_HUMAN  | FAM129A | Q9BZQ8 | Protein Niban (Cell growth-inhibiting gene 39 protein) (Protein FAM129A)                                                                                                                                            | 103 kDa | 0.25  | 8 | 4 | 4 | 2 | 0 | 2 | 0 | 0 | 2 | 1 | 1 | 1.119614042 | 0% (0.57) |
| CYTB_HUMAN        | CP4FB_HUMAN  | CYP4F11 | Q9HB16 | Cytochrome P450 4F11 (EC 1.14.14.1) (CYP4F11)                                                                                                                                                                       | 60 kDa  | 0.34  | 8 | 4 | 4 | 4 | 0 | 0 | 0 | 0 | 0 | 0 | 4 | 1.119614042 | 0% (0.57) |
| HNRH2_HUMAN       | C9JE2_HUMAN  | PCYT1A  | C9JE2  | Choline-phosphate cytidyltransferase A                                                                                                                                                                              | 43 kDa  | 0.2   | 8 | 4 | 4 | 0 | 1 | 1 | 2 | 2 | 1 | 1 | 0 | 1.119614042 | 0% (0.57) |
| RL23A_HUMAN       | DCD_HUMAN    | DCD     | P81605 | Dermcidin (EC 3.4.-.-) (Preproteolysin) [Cleaved into: Survival-promoting peptide; DCD-1]                                                                                                                           | 11 kDa  | 0.37  | 8 | 4 | 4 | 0 | 1 | 2 | 1 | 0 | 0 | 0 | 4 | 1.119614042 | 0% (0.57) |
| B4DZ67_HUMAN (+1) | I3VM54_HUMAN | KDM2A   | I3VM54 | N-terminus deleted lysine-specific demethylase 2A                                                                                                                                                                   | 131 kDa | 0.12  | 6 | 3 | 3 | 0 | 2 | 1 | 0 | 0 | 0 | 2 | 1 | 1.119612321 | 0% (0.60) |
| VASP_HUMAN        | CLCC1_HUMAN  | CLCC1   | Q96S66 | Chloride channel CLIC-like protein 1 (Mid-1-related chloride channel protein 1)                                                                                                                                     | 62 kDa  | 0.22  | 5 | 3 | 3 | 0 | 1 | 1 | 2 | 1 | 0 | 1 | 1 | 1.119612321 | 0% (0.60) |
| PIGT_HUMAN        | LSM4_HUMAN   | LSM4    | Q9Y4Z0 | U6 snRNA-associated Sm-like protein LSM4 (Glycine-rich protein) (GRP)                                                                                                                                               | 15 kDa  | 0.13  | 6 | 3 | 3 | 0 | 0 | 1 | 2 | 0 | 0 | 1 | 2 | 1.119612321 | 0% (0.60) |
| MCCA_HUMAN        | B4DSD7_HUMAN |         | B4DSD7 | cDNA FLJ5863, highly similar to Serine/threonine-protein phosphatase 2A 56 kDa regulatory subunit delta isoform                                                                                                     | 65 kDa  | 0.16  | 6 | 3 | 3 | 0 | 2 | 1 | 0 | 1 | 1 | 1 | 0 | 1.119612321 | 0% (0.60) |
| K7ES61_HUMAN (+1) | Q53FA5_HUMAN |         | Q53FA5 | Protein translocation complex beta variant (Fragment)                                                                                                                                                               | 10 kDa  | 0.25  | 6 | 3 | 3 | 1 | 1 | 0 | 1 | 0 | 1 | 0 | 2 | 1.119612321 | 0% (0.60) |
| PPA5_HUMAN        | B9EIS5_HUMAN | PCM1    | B9EIS5 | PCM1 protein                                                                                                                                                                                                        | 228 kDa | 0.16  | 6 | 3 | 3 | 2 | 0 | 1 | 0 | 0 | 2 | 0 | 1 | 1.119612321 | 0% (0.60) |
| SPTA1_HUMAN       | NTF2_HUMAN   | NUTF2   | P61970 | Nuclear transport factor 2 (NTF-2) (Placental protein 15) (PP15)                                                                                                                                                    | 14 kDa  | 0.06  | 6 | 3 | 3 | 0 | 0 | 0 | 3 | 2 | 1 | 0 | 0 | 1.119612321 | 0% (0.60) |
| COX6C_HUMAN       | PAXB1_HUMAN  | PAXB1   | Q9Y5B6 | PAX3- and PAX7-binding protein 1 (GC-rich sequence DNA-binding factor 1)                                                                                                                                            | 105 kDa | 0.37  | 6 | 3 | 3 | 0 | 1 | 0 | 2 | 1 | 0 | 2 | 0 | 1.119612321 | 0% (0.60) |
| AP1B1_HUMAN       | ATG7_HUMAN   | ATG7    | Q95352 | Ubiquitin-like modifier-activating enzyme ATG7 (ATG12-activating enzyme E1 ATG7) (Autophagy-related protein 7) (APG7-like) (hAGP7) (Ubiquitin-activating enzyme E1-like protein)                                    | 78 kDa  | 0.18  | 6 | 3 | 3 | 0 | 1 | 2 | 0 | 0 | 3 | 0 | 0 | 1.119612321 | 0% (0.60) |
| A8K2Y2_HUMAN (+1) | GLCE_HUMAN   | GLCE    | Q94923 | D-glucuronyl C5-epimerase (EC 5.1.3.17) (Heparan sulfate C5-epimerase) (Hsepi) (Heparin/heparan sulfate:glucuronic acid C5-epimerase) (Heparosan-N-sulfate-glucuronate 5-epimerase)                                 | 70 kDa  | 0.21  | 6 | 3 | 3 | 3 | 0 | 0 | 1 | 0 | 2 | 0 | 1 | 1.119612321 | 0% (0.60) |
| CN37_HUMAN        | 6PGL_HUMAN   | PGLS    | Q95336 | 6-phosphogluconolactonase (6PGL) (EC 3.1.1.31)                                                                                                                                                                      | 28 kDa  | 0.16  | 6 | 3 | 3 | 2 | 0 | 0 | 1 | 0 | 3 | 0 | 0 | 1.119612321 | 0% (0.60) |
| ANXA9_HUMAN       | SNX27_HUMAN  | SNX27   | Q96L92 | Sorting nexin-27                                                                                                                                                                                                    | 61 kDa  | 0.44  | 6 | 3 | 3 | 0 | 0 | 3 | 0 | 2 | 0 | 1 | 0 | 1.119612321 | 0% (0.60) |
| ALG3_HUMAN        | B4DPG9_HUMAN |         | B4DPG9 | cDNA FLJ59630, highly similar to Growth hormone-inducible transmembrane protein                                                                                                                                     | 38 kDa  | 0.046 | 6 | 3 | 3 | 2 | 0 | 0 | 1 | 1 | 1 | 0 | 1 | 1.119612321 | 0% (0.60) |

|                   |              |         |        |                                                                                                                                                                                                            |         |       |   |   |   |   |   |   |   |   |   |   |   |             |           |
|-------------------|--------------|---------|--------|------------------------------------------------------------------------------------------------------------------------------------------------------------------------------------------------------------|---------|-------|---|---|---|---|---|---|---|---|---|---|---|-------------|-----------|
| CLUS_HUMAN        | PLCC_HUMAN   | AGPAT3  | Q9NRZ7 | 1-acyl-sn-glycerol-3-phosphate acyltransferase gamma (EC 2.3.1.51) (1-acylglycerol-3-phosphate O-acyltransferase 3) (1-AGPAT 3) (Lysophosphatidic acid acyltransferase gamma) (LPAAT-gamma)                | 43 kDa  | 0.15  | 6 | 3 | 3 | 2 | 0 | 1 | 0 | 1 | 0 | 1 | 1 | 1.119612321 | 0% (0.60) |
| RMD1_HUMAN        | ABHD6_HUMAN  | ABHD6   | Q9BV23 | Monoacylglycerol lipase ABHD6 (EC 3.1.1.23) (2-arachidonoylglycerol hydrolase) (Abhydrolase domain-containing protein 6)                                                                                   | 38 kDa  | 0.22  | 6 | 3 | 3 | 1 | 1 | 1 | 0 | 0 | 1 | 0 | 2 | 1.119612321 | 0% (0.60) |
| B2R7G6_HUMAN (+1) | E7EQ01_HUMAN | CASP8   | E7EQ01 | Caspase-8 subunit p10 (Fragment)                                                                                                                                                                           | 14 kDa  | 0.097 | 6 | 3 | 3 | 0 | 1 | 1 | 1 | 0 | 3 | 0 | 0 | 1.119612321 | 0% (0.60) |
| CCAR1_HUMAN       | B4DEF8_HUMAN |         | B4DEF8 | cDNA FLJ61100, highly similar to 39S ribosomal protein L45, mitochondrial                                                                                                                                  | 38 kDa  | 0.082 | 6 | 3 | 3 | 2 | 1 | 0 | 0 | 1 | 0 | 1 | 1 | 1.119612321 | 0% (0.60) |
| AP3B1_HUMAN (+1)  | Q96AD0_HUMAN | TRIM47  | Q96AD0 | TRIM47 protein (Tripartite motif-containing 47, isoform CRA_c) (Tripartite motif-containing protein 47)                                                                                                    | 44 kDa  | 0.052 | 6 | 3 | 3 | 3 | 0 | 0 | 0 | 0 | 1 | 2 | 0 | 1.119612321 | 0% (0.60) |
| TMOD1_HUMAN       | B4DT01_HUMAN |         | B4DT01 | cDNA FLJ60347, highly similar to Homo sapiens hydroxycyclohexanone hydrolase (HAGH), transcript variant 1, mRNA                                                                                            | 33 kDa  | 0.16  | 6 | 3 | 3 | 2 | 0 | 0 | 1 | 0 | 1 | 0 | 2 | 1.119612321 | 0% (0.60) |
| FIS1_HUMAN        | B3KUB8_HUMAN |         | B3KUB8 | cDNA FLJ39539 fis, clone PUAEN200828, highly similar to Platelet glycoprotein 4                                                                                                                            | 53 kDa  | 0.35  | 6 | 3 | 3 | 1 | 1 | 0 | 1 | 0 | 0 | 2 | 1 | 1.119612321 | 0% (0.60) |
| RT35_HUMAN        | E7EMW7_HUMAN | UBR5    | E7EMW7 | E3 ubiquitin-protein ligase UBR5                                                                                                                                                                           | 309 kDa | 0.071 | 4 | 2 | 2 | 0 | 0 | 1 | 1 | 0 | 0 | 2 | 0 | 1.1196106   | 0% (0.64) |
| A8K2Q6_HUMAN (+1) | B4DG57_HUMAN |         | B4DG57 | cDNA FLJ61230, highly similar to PHD finger protein 14                                                                                                                                                     | 69 kDa  | 0.15  | 4 | 2 | 2 | 1 | 0 | 0 | 1 | 2 | 0 | 0 | 0 | 1.1196106   | 0% (0.64) |
| Q504R6_HUMAN      | PSA1_HUMAN   | PSMA1   | P25786 | Proteasome subunit alpha type-1 (EC 3.4.25.1) (30 kDa prosomal protein) (PROS-30) (Macropain subunit C2) (Multicatalytic endopeptidase complex subunit C2) (Proteasome component C2) (Proteasome nu chain) | 30 kDa  | 0.25  | 4 | 2 | 2 | 0 | 0 | 0 | 2 | 0 | 1 | 2 | 0 | 1.1196106   | 0% (0.64) |
| B0UX83_HUMAN (+1) | F5GYG5_HUMAN | REXO2   | F5GYG5 | Oligoribonuclease, mitochondrial                                                                                                                                                                           | 25 kDa  | 0.075 | 4 | 2 | 2 | 0 | 0 | 0 | 1 | 0 | 2 | 0 | 0 | 1.1196106   | 0% (0.64) |
| LTOR3_HUMAN (+1)  | SLTM_HUMAN   | SLTM    | Q9NWH9 | SAFB-like transcription modulator (Modulator of estrogen-induced transcription)                                                                                                                            | 117 kDa | 0.21  | 4 | 2 | 2 | 0 | 0 | 1 | 1 | 0 | 0 | 2 | 0 | 1.1196106   | 0% (0.64) |
| SMD1_HUMAN        | B3KTA3_HUMAN |         | B3KTA3 | Fascin                                                                                                                                                                                                     | 52 kDa  | 0.2   | 4 | 2 | 2 | 0 | 0 | 2 | 0 | 0 | 2 | 0 | 0 | 1.1196106   | 0% (0.64) |
| B4DRT2_HUMAN (+1) | B7Z3U1_HUMAN |         | B7Z3U1 | cDNA FLJ53798, highly similar to Long-chain fatty acid transport protein 1 (EC 6.2.1.-)                                                                                                                    | 71 kDa  | 0.19  | 4 | 2 | 2 | 2 | 0 | 0 | 1 | 0 | 0 | 1 | 1 | 1.1196106   | 0% (0.64) |
| H0YKD8_HUMAN (+2) | NDUBB_HUMAN  | NDUFB11 | Q9NX14 | NADH dehydrogenase [ubiquinone] 1 beta subcomplex subunit 11, mitochondrial (Complex I-ESSS) (CI-ESSS) (NADH-ubiquinone oxidoreductase ESSS subunit) (Neuronal protein 17.3) (Np17.3) (p17.3)              | 17 kDa  | 0.21  | 4 | 2 | 2 | 2 | 1 | 0 | 1 | 2 | 0 | 0 | 0 | 1.1196106   | 0% (0.64) |
| B2R710_HUMAN (+1) | B4DQQ5_HUMAN |         | B4DQQ5 | cDNA FLJ53159, highly similar to Nucleoporin NDC1                                                                                                                                                          | 63 kDa  | 0.17  | 4 | 2 | 2 | 1 | 0 | 0 | 1 | 1 | 0 | 0 | 1 | 1.1196106   | 0% (0.64) |
| B2R9S4_HUMAN (+2) | RM16_HUMAN   | MRPL16  | Q9NX20 | 39S ribosomal protein L16, mitochondrial (L16mt) (MRP-L16)                                                                                                                                                 | 28 kDa  | 0.1   | 4 | 2 | 2 | 1 | 0 | 0 | 1 | 1 | 0 | 1 | 0 | 1.1196106   | 0% (0.64) |
| B2R6F5_HUMAN (+1) | B4DJ54_HUMAN |         | B4DJ54 | cDNA FLJ53010, highly similar to Soluble calcium-activated nucleotidase 1 (EC 3.6.1.6)                                                                                                                     | 39 kDa  | 0.091 | 4 | 2 | 2 | 0 | 2 | 0 | 0 | 0 | 0 | 2 | 0 | 1.1196106   | 0% (0.64) |
| TBB4A_HUMAN       | STAT2_HUMAN  | STAT2   | P52630 | Signal transducer and activator of transcription 2 (p113)                                                                                                                                                  | 98 kDa  | 0.44  | 4 | 2 | 2 | 0 | 0 | 0 | 2 | 0 | 2 | 0 | 0 | 1.1196106   | 0% (0.64) |
| ATPF1_HUMAN (+1)  | ARP5L_HUMAN  | ARPC5L  | Q9BPX5 | Actin-related protein 2/3 complex subunit 5-like protein (Arp2/3 complex 16 kDa subunit 2) (ARCI6-2)                                                                                                       | 17 kDa  | 0.27  | 4 | 2 | 2 | 0 | 1 | 0 | 1 | 1 | 0 | 0 | 1 | 1.1196106   | 0% (0.64) |

|                   |              |         |        |                                                                                                                                                                                                                                            |         |       |   |   |   |   |   |   |   |   |   |   |   |            |           |
|-------------------|--------------|---------|--------|--------------------------------------------------------------------------------------------------------------------------------------------------------------------------------------------------------------------------------------------|---------|-------|---|---|---|---|---|---|---|---|---|---|---|------------|-----------|
| UMPS_HUMAN        | B3KN18_HUMAN |         | B3KN18 | cDNA FLJ14670 fis. clone NT2RP2003272, highly similar to Ubiquilin-1                                                                                                                                                                       | 63 kDa  | 0.13  | 4 | 2 | 2 | 0 | 1 | 1 | 0 | 0 | 0 | 2 | 0 | 1.1196106  | 0% (0.64) |
| PUF60_HUMAN       | E9PN70_HUMAN | TRAPPC4 | E9PN70 | Trafficking protein particle complex subunit 4                                                                                                                                                                                             | 29 kDa  | 0.14  | 4 | 2 | 2 | 0 | 0 | 1 | 1 | 0 | 2 | 0 | 0 | 1.1196106  | 0% (0.64) |
| ACTBL_HUMAN       | B1AL19_HUMAN | TXNIP   | B1AL19 | Thioredoxin interacting protein (Fragment)                                                                                                                                                                                                 | 34 kDa  | 0.23  | 4 | 2 | 2 | 0 | 0 | 2 | 0 | 0 | 0 | 2 | 0 | 1.1196106  | 0% (0.64) |
| ALAT2_HUMAN       | B2R8N1_HUMAN |         | B2R8N1 | cDNA, FLJ93976, highly similar to Homo sapiens COP9 homolog (COP9), mRNA                                                                                                                                                                   | 23 kDa  | 0.17  | 4 | 2 | 2 | 0 | 0 | 0 | 2 | 1 | 1 | 0 | 1 | 1.1196106  | 0% (0.64) |
| CD109_HUMAN       | Q53R32_HUMAN | RPIA    | Q53R32 | Putative uncharacterized protein RPIA (Fragment)                                                                                                                                                                                           | 20 kDa  | 0.065 | 4 | 2 | 2 | 0 | 0 | 0 | 2 | 2 | 0 | 0 | 0 | 1.1196106  | 0% (0.64) |
| PPB1_HUMAN        | C9J8U2_HUMAN | NAPRT1  | C9J8U2 | Nicotinate phosphoribosyltransferase (Nicotinate phosphoribosyltransferase domain containing 1, isoform CRA_e)                                                                                                                             | 52 kDa  | 0.2   | 4 | 2 | 2 | 0 | 1 | 1 | 0 | 0 | 2 | 0 | 0 | 1.1196106  | 0% (0.64) |
| A8K5Y7_HUMAN (+1) | B4DDV1_HUMAN | IFIT5   | B4DDV1 | Interferon-induced protein with tetratricopeptide repeats 5 (cDNA FLJ53857, highly similar to Interferon-induced protein with tetratricopeptide repeats 5)                                                                                 | 51 kDa  | 0.1   | 4 | 2 | 2 | 0 | 0 | 0 | 2 | 0 | 2 | 0 | 0 | 1.1196106  | 0% (0.64) |
| A8K2D6_HUMAN (+1) | ZN292_HUMAN  | ZNF292  | O60281 | Zinc finger protein 292                                                                                                                                                                                                                    | 305 kDa | 0.2   | 2 | 1 | 1 | 0 | 1 | 0 | 0 | 0 | 1 | 0 | 0 | 1.11960888 | 0% (0.72) |
| Q4AEJ3_HUMAN (+1) | EXOSX_HUMAN  | EXOSC10 | Q01780 | Exosome component 10 (EC 3.1.13.-) (Autoantigen PM/Scl 2) (P100 polymyositis-scleroderma overlap syndrome-associated autoantigen) (Polymyositis/scleroderma autoantigen 100 kDa) (PM/Scl-100) (Polymyositis/scleroderma autoantigen 2)     | 101 kDa | 0.096 | 2 | 1 | 1 | 0 | 1 | 0 | 0 | 0 | 0 | 1 | 0 | 1.11960888 | 0% (0.72) |
| PSA3_HUMAN (+1)   | PB1_HUMAN    | PBRM1   | Q86U86 | Protein polybromo-1 (hPB1) (BRG1-associated factor 180) (BAF180) (Polybromo-1D)                                                                                                                                                            | 193 kDa | 0.25  | 2 | 1 | 1 | 0 | 0 | 0 | 1 | 0 | 0 | 1 | 0 | 1.11960888 | 0% (0.72) |
| RM47_HUMAN        | CBP_HUMAN    | CREBBP  | Q92793 | CREB-binding protein (EC 2.3.1.48)                                                                                                                                                                                                         | 265 kDa | 0.088 | 2 | 1 | 1 | 1 | 0 | 0 | 0 | 0 | 1 | 0 | 0 | 1.11960888 | 0% (0.72) |
| SYYC_HUMAN        | NUDT9_HUMAN  | NUDT9   | Q9BW91 | ADP-ribose pyrophosphatase, mitochondrial (EC 3.6.1.13) (ADP-ribose diphosphatase) (ADP-ribose phosphohydrolase) (Adenosine diphosphoribose pyrophosphatase) (ADPR-PPase) (Nucleoside diphosphate-linked moiety X motif 9) (Nudix motif 9) | 39 kDa  | 0.11  | 3 | 1 | 1 | 1 | 0 | 0 | 0 | 0 | 0 | 1 | 0 | 1.11960888 | 0% (0.72) |
| F5H0M4_HUMAN (+1) | ATAD5_HUMAN  | ATAD5   | Q96QE3 | ATPase family AAA domain-containing protein 5 (Chromosome fragility-associated gene 1 protein)                                                                                                                                             | 208 kDa | 0.22  | 2 | 1 | 1 | 1 | 0 | 0 | 0 | 0 | 1 | 0 | 0 | 1.11960888 | 0% (0.72) |
| DNJA2_HUMAN       | MOQX35_HUMAN | PAF1    | MOQX35 | Paf1, RNA polymerase II associated factor, homolog (S. cerevisiae), isoform CRA_c (RNA polymerase II-associated factor 1 homolog)                                                                                                          | 55 kDa  | 0.14  | 2 | 1 | 1 | 0 | 1 | 0 | 0 | 0 | 0 | 1 | 0 | 1.11960888 | 0% (0.72) |
| RPB1_HUMAN        | STRP1_HUMAN  | STRIP1  | Q5VSL9 | Striatin-interacting protein 1 (Protein FAM40A)                                                                                                                                                                                            | 96 kDa  | 0.039 | 2 | 1 | 1 | 0 | 0 | 1 | 0 | 1 | 0 | 0 | 0 | 1.11960888 | 0% (0.72) |
| NUP37_HUMAN       | CORO7_HUMAN  | CORO7   | P57737 | Coronin-7 (Crm7) (70 kDa WD repeat tumor rejection antigen homolog)                                                                                                                                                                        | 101 kDa | 0.17  | 2 | 1 | 1 | 0 | 0 | 1 | 0 | 0 | 1 | 0 | 0 | 1.11960888 | 0% (0.72) |
| B4DUX0_HUMAN (+1) | CAND2_HUMAN  | CAND2   | O75155 | Cullin-associated NEDD8-dissociated protein 2 (Cullin-associated and neddylation-dissociated protein 2) (Epididymis tissue protein Li 169) (TBP-interacting protein of 120 kDa B) (TBP-interacting protein 120B) (p120 CAND2)              | 135 kDa | 0.31  | 2 | 1 | 1 | 0 | 0 | 1 | 0 | 0 | 1 | 0 | 0 | 1.11960888 | 0% (0.72) |
| RM37_HUMAN        | DNJC9_HUMAN  | DNAJC9  | Q8WXX5 | DnaJ homolog subfamily C member 9 (DnaJ protein SB73)                                                                                                                                                                                      | 30 kDa  | 0.19  | 2 | 1 | 1 | 0 | 1 | 0 | 0 | 0 | 0 | 0 | 1 | 1.11960888 | 0% (0.72) |

|                   |              |         |         |                                                                                                                                                                                                    |         |       |   |   |   |   |   |   |   |   |   |   |   |            |           |
|-------------------|--------------|---------|---------|----------------------------------------------------------------------------------------------------------------------------------------------------------------------------------------------------|---------|-------|---|---|---|---|---|---|---|---|---|---|---|------------|-----------|
| F5GW8P8_HUMAN     | A8K4P8_HUMAN |         | A8K4P8  | cDNA FLJ75337                                                                                                                                                                                      | 171 kDa | 0.27  | 2 | 1 | 1 | 0 | 0 | 0 | 1 | 0 | 0 | 1 | 0 | 1.11960888 | 0% (0.72) |
| UGDH_HUMAN        | LSG1_HUMAN   | LSG1    | Q9H089  | Large subunit GTPase 1 homolog (hLsg1) (EC 3.6.1.-)                                                                                                                                                | 75 kDa  | 0.23  | 2 | 1 | 1 | 0 | 1 | 0 | 0 | 0 | 0 | 1 | 0 | 1.11960888 | 0% (0.72) |
| ACOX3_HUMAN (+1)  | HD_HUMAN     | HTT     | P42858  | Huntingtin (Huntington disease protein) (HD protein)                                                                                                                                               | 348 kDa | 0.14  | 2 | 1 | 1 | 0 | 1 | 0 | 0 | 0 | 0 | 1 | 0 | 1.11960888 | 0% (0.72) |
| DYSF_HUMAN        | GEM14_HUMAN  | GEMIN4  | P57678  | Gem-associated protein 4 (Gemin-4) (Component of gems 4) (p97)                                                                                                                                     | 120 kDa | 0.056 | 2 | 1 | 1 | 0 | 0 | 0 | 1 | 1 | 0 | 0 | 0 | 1.11960888 | 0% (0.72) |
| MK01_HUMAN        | B2R6Q2_HUMAN |         | B2R6Q2  | Alkaline phosphatase (EC 3.1.3.1)                                                                                                                                                                  | 57 kDa  | 0.19  | 2 | 1 | 1 | 0 | 0 | 0 | 1 | 0 | 1 | 0 | 0 | 1.11960888 | 0% (0.72) |
| PSA7_HUMAN        | FAKD5_HUMAN  | FASTKD5 | Q7L8L6  | FAST kinase domain-containing protein 5                                                                                                                                                            | 87 kDa  | 0.21  | 2 | 1 | 1 | 0 | 0 | 0 | 1 | 1 | 0 | 0 | 0 | 1.11960888 | 0% (0.72) |
| B4DP80_HUMAN      | CC115_HUMAN  | CCDC115 | Q96NT0  | Coiled-coil domain-containing protein 115                                                                                                                                                          | 20 kDa  | 0.26  | 2 | 1 | 1 | 0 | 0 | 1 | 0 | 0 | 0 | 0 | 1 | 1.11960888 | 0% (0.72) |
| B7XGC2_HUMAN      | A8K5N3_HUMAN |         | A8K5N3  | Palmitoyltransferase (EC 2.3.1.-)                                                                                                                                                                  | 71 kDa  | 0.46  | 2 | 1 | 1 | 1 | 0 | 0 | 0 | 0 | 0 | 0 | 1 | 1.11960888 | 0% (0.72) |
| B3GQE6_HUMAN (+2) | CHM2A_HUMAN  | CHMP2A  | O43633  | Charged multivesicular body protein 2a (Chromatin-modifying protein 2a) (CHMP2a) (Putative breast adenocarcinoma marker BC-2) (Vacuolar protein sorting-associated protein 2-1) (Vps2-1) (hVps2-1) | 25 kDa  | 0.13  | 2 | 1 | 1 | 0 | 0 | 0 | 1 | 0 | 0 | 1 | 0 | 1.11960888 | 0% (0.72) |
| B3KUB6_HUMAN      | TSR1_HUMAN   | TSR1    | Q2NL82  | Pre-rRNA-processing protein TSR1 homolog                                                                                                                                                           | 92 kDa  | 0.075 | 2 | 1 | 1 | 0 | 0 | 0 | 1 | 0 | 1 | 0 | 0 | 1.11960888 | 0% (0.72) |
| DRG1_HUMAN        | ANPRA_HUMAN  | NPR1    | P16066  | Atrial natriuretic peptide receptor 1 (EC 4.6.1.2) (Atrial natriuretic peptide receptor type A) (ANP-A) (ANPR-A) (NPR-A) (Guanylate cyclase A) (GC-A)                                              | 119 kDa | 0.23  | 2 | 1 | 1 | 0 | 0 | 1 | 0 | 1 | 0 | 0 | 0 | 1.11960888 | 0% (0.72) |
| SYJ2B_HUMAN       | DDX60_HUMAN  | DDX60   | Q8IY21  | Probable ATP-dependent RNA helicase DDX60 (EC 3.6.4.13) (DEAD box protein 60)                                                                                                                      | 198 kDa | 0.25  | 2 | 1 | 1 | 0 | 0 | 0 | 1 | 0 | 1 | 0 | 0 | 1.11960888 | 0% (0.72) |
| NOP2_HUMAN        | A8K367_HUMAN |         | A8K367  | cDNA FLJ76104, highly similar to Homo sapiens carboxylesterase 2 (intestine, liver) (CES2), transcript variant 1, mRNA                                                                             | 69 kDa  | 0.067 | 2 | 1 | 1 | 1 | 0 | 0 | 0 | 1 | 0 | 0 | 0 | 1.11960888 | 0% (0.72) |
| P3H1_HUMAN        | B2RBP3_HUMAN |         | B2RBP3  | cDNA, FLJ95615, highly similar to Homo sapiens ubiquitin-activating enzyme E1C (UBA3 homolog, yeast) (UBE1C), mRNA                                                                                 | 52 kDa  | 0.077 | 2 | 1 | 1 | 0 | 0 | 0 | 1 | 0 | 1 | 0 | 0 | 1.11960888 | 0% (0.72) |
| F5H5P2_HUMAN (+3) | E7ETU7_HUMAN | MRPL3   | E7ETU7  | 39S ribosomal protein L3, mitochondrial                                                                                                                                                            | 42 kDa  | 0.11  | 2 | 1 | 1 | 1 | 0 | 0 | 0 | 0 | 0 | 0 | 1 | 1.11960888 | 0% (0.72) |
| F5H3I5_HUMAN      | ISCA2_HUMAN  | ISCA2   | Q86U28  | Iron-sulfur cluster assembly 2 homolog, mitochondrial (HESB-like domain-containing protein 1)                                                                                                      | 16 kDa  | 0.092 | 2 | 1 | 1 | 0 | 1 | 0 | 0 | 1 | 0 | 0 | 0 | 1.11960888 | 0% (0.72) |
| CLD3_HUMAN        | B4DMD3_HUMAN |         | B4DMD3  | cDNA FLJ58174, highly similar to WW domain-binding protein 11                                                                                                                                      | 65 kDa  | 0.19  | 2 | 1 | 1 | 0 | 1 | 0 | 0 | 0 | 0 | 0 | 1 | 1.11960888 | 0% (0.72) |
| B2R6K4_HUMAN (+2) | SLAF8_HUMAN  | SLAMF8  | Q9P0V8  | SLAM family member 8 (B-lymphocyte activator macrophage expressed) (BCM-like membrane protein) (CD antigen CD353)                                                                                  | 32 kDa  | 0.22  | 2 | 1 | 1 | 1 | 0 | 0 | 0 | 0 | 0 | 0 | 1 | 1.11960888 | 0% (0.72) |
| J3QLR8_HUMAN (+1) | NDUB1_HUMAN  | NDUFB1  | O75438  | NADH dehydrogenase [ubiquinone] 1 beta subcomplex subunit 1 (Complex I-MNLL) (CI-MNLL) (NADH-ubiquinone oxidoreductase MNLL subunit)                                                               | 7 kDa   | 0.38  | 2 | 1 | 1 | 1 | 0 | 0 | 0 | 0 | 0 | 1 | 0 | 1.11960888 | 0% (0.72) |
| RAB9A_HUMAN       | ARFRP_HUMAN  | ARFRP1  | Q13795  | ADP-ribosylation factor-related protein 1 (ARF-related protein 1) (ARP)                                                                                                                            | 23 kDa  | 0.21  | 2 | 1 | 1 | 0 | 1 | 0 | 0 | 0 | 0 | 0 | 1 | 1.11960888 | 0% (0.72) |
| B3KY60_HUMAN (+1) | C9J712_HUMAN | PFN2    | C9J712  | Profilin-2                                                                                                                                                                                         | 10 kDa  | 0.086 | 2 | 1 | 1 | 0 | 0 | 0 | 1 | 0 | 1 | 0 | 0 | 1.11960888 | 0% (0.72) |
| CLIC5_HUMAN       | DCAKD_HUMAN  | DCAKD   | Q8WVC6  | Dephospho-CoA kinase domain-containing protein                                                                                                                                                     | 27 kDa  | 0.15  | 2 | 1 | 1 | 1 | 0 | 0 | 0 | 0 | 0 | 1 | 0 | 1.11960888 | 0% (0.72) |
| Q53HG7_HUMAN (+1) | WDR82_HUMAN  | WDR82   | Q6UXXN9 | WD repeat-containing protein 82 (Protein TMEM113) (Swd2)                                                                                                                                           | 35 kDa  | 0.049 | 2 | 1 | 1 | 0 | 0 | 0 | 1 | 1 | 0 | 0 | 0 | 1.11960888 | 0% (0.72) |
| SC61G_HUMAN       | B8K1J4_HUMAN |         | B8K1J4  | Signal protein                                                                                                                                                                                     | 28 kDa  | 0.37  | 2 | 1 | 1 | 1 | 0 | 0 | 0 | 1 | 0 | 0 | 0 | 1.11960888 | 0% (0.72) |

|                  |              |          |        |                                                                                                                                                                                                                                                                                                  |         |       |     |     |     |     |    |    |    |    |    |    |    |             |           |
|------------------|--------------|----------|--------|--------------------------------------------------------------------------------------------------------------------------------------------------------------------------------------------------------------------------------------------------------------------------------------------------|---------|-------|-----|-----|-----|-----|----|----|----|----|----|----|----|-------------|-----------|
| RSF1_HUMAN       | ALG9_HUMAN   | ALG9     | Q9HGU8 | Alpha-1,2-mannosyltransferase ALG9 (EC 2.4.1.259) (EC 2.4.1.261) (Asparagine-linked glycosylation protein 9 homolog) (Disrupted in bipolar disorder protein 1) (Dol-P-Man:Man(6)GlcNAc(2)-PP-Dol alpha-1,2-mannosyltransferase) (Dol-P-Man:Man(8)GlcNAc(2)-PP-Dol alpha-1,2-mannosyltransferase) | 70 kDa  | 0.035 | 2   | 1   | 1   | 0   | 0  | 0  | 0  | 0  | 0  | 0  | 1  | 1.11960888  | 0% (0.72) |
| SYFA_HUMAN       | B4E126_HUMAN |          | B4E126 | cDNA FLJ61199, highly similar to UBX domain-containing protein 7                                                                                                                                                                                                                                 | 39 kDa  | 0.11  | 2   | 1   | 1   | 0   | 0  | 1  | 0  | 1  | 0  | 0  | 0  | 1.11960888  | 0% (0.72) |
| E7EVQ6_HUMAN(+2) | DUS23_HUMAN  | DUSP23   | Q9BVJ7 | Dual specificity protein phosphatase 23 (EC 3.1.3.16) (EC 3.1.3.48) (Low molecular mass dual specificity phosphatase 3) (LDP-3) (VHL-like phosphatase Z)                                                                                                                                         | 17 kDa  | 0.12  | 2   | 1   | 1   | 0   | 0  | 0  | 1  | 0  | 1  | 0  | 0  | 1.11960888  | 0% (0.72) |
| Q53GA0_HUMAN(+1) | F8VX04_HUMAN | SLC38A1  | F8VX04 | Sodium-coupled neutral amino acid transporter 1                                                                                                                                                                                                                                                  | 56 kDa  | 0.25  | 2   | 1   | 1   | 0   | 1  | 0  | 0  | 1  | 0  | 0  | 0  | 1.11960888  | 0% (0.72) |
| PRP19_HUMAN      | DHX9_HUMAN   | DHX9     | Q08211 | ATP-dependent RNA helicase A (RHA) (EC 3.6.4.13) (DEAH box protein 9) (Leukophysin) (LKP) (Nuclear DNA helicase II) (NDH II)                                                                                                                                                                     | 141 kDa | 0.13  | 346 | 174 | 173 | 23  | 54 | 44 | 53 | 49 | 25 | 62 | 37 | 1.113500877 | 0% (0.16) |
| A8K0F7_HUMAN(+1) | B4DWS6_HUMAN |          | B4DWS6 | cDNA FLJ61181, highly similar to Homo sapiens hydroxysteroid (17-beta) dehydrogenase 12 (HSD17B12), mRNA                                                                                                                                                                                         | 34 kDa  | 0.17  | 182 | 92  | 91  | 30  | 18 | 17 | 29 | 19 | 26 | 20 | 26 | 1.107741488 | 0% (0.26) |
| RAD50_HUMAN      | A0PJ92_HUMAN | NOP56    | A0PJ92 | NOP56 protein (Fragment)                                                                                                                                                                                                                                                                         | 50 kDa  | 0.051 | 161 | 81  | 80  | 13  | 17 | 21 | 30 | 15 | 21 | 23 | 21 | 1.10611681  | 0% (0.28) |
| B4DXK8_HUMAN(+1) | ATPA_HUMAN   | ATP5A1   | P25705 | ATP synthase subunit alpha, mitochondrial                                                                                                                                                                                                                                                        | 60 kDa  | 0.082 | 611 | 309 | 304 | 100 | 68 | 63 | 79 | 64 | 80 | 67 | 95 | 1.102009316 | 0% (0.11) |
| CNOT1_HUMAN      | GT251_HUMAN  | COLGALT1 | Q8NBJ5 | Procollagen galactosyltransferase 1 (EC 2.4.1.50) (Collagen beta(1-O)galactosyltransferase 1) (Glycosyltransferase 25 family member 1) (Hydroxyllysine galactosyltransferase 1)                                                                                                                  | 72 kDa  | 0.042 | 112 | 57  | 56  | 9   | 24 | 18 | 7  | 10 | 10 | 15 | 22 | 1.100467056 | 0% (0.33) |
| WFS1_HUMAN       | PROF1_HUMAN  | PFN1     | P07737 | Profilin-1 (Epididymis tissue protein Li 184a) (Profilin I)                                                                                                                                                                                                                                      | 15 kDa  | 0.079 | 188 | 95  | 93  | 11  | 22 | 27 | 35 | 16 | 36 | 26 | 16 | 1.096471277 | 0% (0.28) |
| A5PLK7_HUMAN(+1) | RL10_HUMAN   | RPL10    | P27635 | 60S ribosomal protein L10 (Laminin receptor homolog) (Protein QM) (Tumor suppressor QM)                                                                                                                                                                                                          | 25 kDa  | 0.13  | 83  | 42  | 41  | 10  | 9  | 12 | 11 | 10 | 7  | 13 | 11 | 1.093775178 | 0% (0.38) |
| P5CR2_HUMAN      | E9PLK3_HUMAN | NPEPPS   | E9PLK3 | Puromycin-sensitive aminopeptidase                                                                                                                                                                                                                                                               | 103 kDa | 0.24  | 81  | 42  | 41  | 12  | 7  | 6  | 17 | 15 | 7  | 11 | 7  | 1.093775178 | 0% (0.38) |
| D6RA47_HUMAN(+3) | SFXN1_HUMAN  | SFXN1    | Q9H9B4 | Sideroflexin-1 (Tricarboxylate carrier protein) (TCC)                                                                                                                                                                                                                                            | 36 kDa  | 0.14  | 81  | 41  | 40  | 15  | 6  | 9  | 11 | 10 | 13 | 8  | 9  | 1.093160759 | 0% (0.38) |
| NU188_HUMAN      | A0S3T1_HUMAN | COX2     | A0S3T1 | Cytochrome c oxidase subunit 2                                                                                                                                                                                                                                                                   | 26 kDa  | 0.069 | 79  | 41  | 40  | 14  | 10 | 6  | 11 | 10 | 10 | 9  | 11 | 1.093160759 | 0% (0.38) |
| PDIP2_HUMAN      | B7Z8A2_HUMAN |          | B7Z8A2 | cDNA FLJ51671, highly similar to Prenylcysteine oxidase (EC 1.8.3.5)                                                                                                                                                                                                                             | 55 kDa  | 0.23  | 164 | 83  | 81  | 40  | 16 | 12 | 15 | 12 | 38 | 17 | 14 | 1.093137039 | 0% (0.30) |
| FCGRN_HUMAN      | THIL_HUMAN   | ACAT1    | P24752 | Acetyl-CoA acetyltransferase, mitochondrial (EC 2.3.1.9) (Acetoacetyl-CoA thiolase) (T2)                                                                                                                                                                                                         | 45 kDa  | 0.13  | 77  | 39  | 38  | 9   | 10 | 11 | 9  | 15 | 6  | 6  | 11 | 1.091840587 | 0% (0.39) |
| B7Z4A1_HUMAN(+1) | A8KA83_HUMAN |          | A8KA83 | cDNA FLJ78586, highly similar to Homo sapiens VAMP (vesicle-associated membrane protein)-associated protein A, 33kDa (VAPA), mRNA (cDNA, FLJ96653, Homo sapiens VAMP (vesicle-associated membrane protein)-associated protein A, 33kDa (VAPA), mRNA)                                             | 27 kDa  | 0.2   | 73  | 37  | 36  | 12  | 8  | 8  | 9  | 9  | 11 | 7  | 9  | 1.090382718 | 0% (0.39) |
| A8K883_HUMAN     | A8K897_HUMAN |          | A8K897 | cDNA FLJ78686, highly similar to Homo sapiens nucleoporin 93kDa (NUP93), mRNA                                                                                                                                                                                                                    | 93 kDa  | 0.1   | 71  | 36  | 35  | 5   | 10 | 11 | 10 | 10 | 4  | 12 | 9  | 1.089595216 | 0% (0.40) |

|                   |              |        |        |                                                                                                                                                                                                                     |         |       |     |     |     |    |    |    |    |    |    |     |    |             |           |
|-------------------|--------------|--------|--------|---------------------------------------------------------------------------------------------------------------------------------------------------------------------------------------------------------------------|---------|-------|-----|-----|-----|----|----|----|----|----|----|-----|----|-------------|-----------|
| AGR2_HUMAN (+3)   | B5MDF5_HUMAN | RAN    | B5MDF5 | GTP-binding nuclear protein Ran (RAN, member RAS oncogene family, isoform CRA_c)                                                                                                                                    | 26 kDa  | 0.36  | 71  | 36  | 35  | 7  | 9  | 6  | 14 | 10 | 14 | 7   | 4  | 1.089595216 | 0% (0.40) |
| B4DNJ6_HUMAN (+1) | Q59GA1_HUMAN |        | Q59GA1 | Splicing factor, arginine/serine-rich 10 (Transformer 2 homolog, Drosophila) variant (Fragment)                                                                                                                     | 32 kDa  | 0.21  | 69  | 35  | 34  | 7  | 8  | 9  | 11 | 11 | 6  | 9   | 8  | 1.088764361 | 0% (0.40) |
| SYLM_HUMAN        | CPNE3_HUMAN  | CPNE3  | O75131 | Copine-3 (Copine III)                                                                                                                                                                                               | 60 kDa  | 0.11  | 69  | 35  | 34  | 19 | 5  | 6  | 8  | 10 | 10 | 8   | 6  | 1.088764361 | 0% (0.40) |
| IPO9_HUMAN        | RAB10_HUMAN  | RAB10  | P61026 | Ras-related protein Rab-10                                                                                                                                                                                          | 23 kDa  | 0.067 | 128 | 65  | 63  | 20 | 17 | 15 | 13 | 12 | 14 | 17  | 21 | 1.085884986 | 0% (0.34) |
| VAC14_HUMAN       | Q6IQ30_HUMAN | PABPC4 | Q6IQ30 | PABPC4 protein                                                                                                                                                                                                      | 72 kDa  | 0.11  | 127 | 65  | 63  | 9  | 19 | 21 | 17 | 20 | 13 | 18  | 13 | 1.085884986 | 0% (0.34) |
| PGAM5_HUMAN       | SOAT1_HUMAN  | SOAT1  | P35610 | Sterol O-acyltransferase 1 (EC 2.3.1.26) (Acyl-coenzyme A:cholesterol acyltransferase 1) (ACAT-1) (Cholesterol acyltransferase 1)                                                                                   | 65 kDa  | 0.22  | 61  | 31  | 30  | 8  | 9  | 10 | 4  | 1  | 3  | 6   | 20 | 1.084926749 | 0% (0.42) |
| CATS_HUMAN        | B2R7W4_HUMAN |        | B2R7W4 | cDNA, FLJ93632, highly similar to Homo sapiens heterogeneous nuclear ribonucleoprotein R (HNRPR), mRNA                                                                                                              | 71 kDa  | 0.21  | 185 | 95  | 92  | 18 | 33 | 23 | 22 | 33 | 9  | 31  | 20 | 1.084822003 | 0% (0.30) |
| RT02_HUMAN        | PPIB_HUMAN   | PPIB   | P23284 | Peptidyl-prolyl cis-trans isomerase B (PPIase B) (EC 5.2.1.8) (CYP-S1) (Cyclophilin B) (Rotamase B) (S-cyclophilin) (SCYLP)                                                                                         | 24 kDa  | 0.061 | 248 | 126 | 122 | 28 | 27 | 27 | 43 | 12 | 37 | 34  | 38 | 1.084561053 | 0% (0.27) |
| D3DP46_HUMAN (+1) | A8KAP3_HUMAN |        | A8KAP3 | cDNA FLJ78483, highly similar to Homo sapiens elongation factor Tu GTP binding domain containing 2 (EFTUD2), mRNA                                                                                                   | 109 kDa | 0.18  | 185 | 94  | 91  | 27 | 25 | 24 | 20 | 19 | 13 | 32  | 28 | 1.084453925 | 0% (0.31) |
| HACD2_HUMAN       | B3KY63_HUMAN |        | B3KY63 | cDNA FLJ16830 fis, clone UTERU3022536, highly similar to Chromodomain helicase-DNA-binding protein 4 (EC 3.6.1.-)                                                                                                   | 215 kDa | 0.094 | 55  | 28  | 27  | 3  | 7  | 8  | 11 | 11 | 2  | 9   | 5  | 1.081360976 | 0% (0.43) |
| PSA5_HUMAN (+1)   | SMC1A_HUMAN  | SMC1A  | Q14683 | Structural maintenance of chromosomes protein 1A (SMC protein 1A) (SMC-1-alpha) (SMC-1A) (Sb1.8)                                                                                                                    | 143 kDa | 0.25  | 56  | 28  | 27  | 7  | 7  | 13 | 1  | 12 | 0  | 13  | 4  | 1.081360976 | 0% (0.43) |
| F8W6G1_HUMAN (+1) | PSD12_HUMAN  | PSMD12 | O00232 | 26S proteasome non-ATPase regulatory subunit 12 (26S proteasome regulatory subunit RPN5) (26S proteasome regulatory subunit p55)                                                                                    | 53 kDa  | 0.11  | 55  | 28  | 27  | 7  | 7  | 6  | 8  | 6  | 11 | 7   | 2  | 1.081360976 | 0% (0.43) |
| LTOR1_HUMAN       | F5H6U7_HUMAN | GOLT1B | F5H6U7 | Vesicle transport protein GOT1B                                                                                                                                                                                     | 14 kDa  | 0.3   | 55  | 28  | 27  | 10 | 7  | 7  | 4  | 4  | 8  | 5   | 10 | 1.081360976 | 0% (0.43) |
| EIF3I_HUMAN       | MYH9_HUMAN   | MYH9   | P35579 | Myosin-9 (Cellular myosin heavy chain, type A) (Myosin heavy chain 9) (Myosin heavy chain, non-muscle IIa) (Non-muscle myosin heavy chain A) (NMMHC-A) (Non-muscle myosin heavy chain IIa) (NMMHC II-a) (NMMHC-IIA) | 227 kDa | 0.21  | 615 | 313 | 302 | 48 | 92 | 94 | 81 | 37 | 75 | 102 | 89 | 1.080766686 | 0% (0.17) |
| MIF_HUMAN         | ACADM_HUMAN  | ACADM  | P11310 | Medium-chain specific acyl-CoA dehydrogenase, mitochondrial (MCAD) (EC 1.3.8.7)                                                                                                                                     | 47 kDa  | 0.17  | 109 | 56  | 54  | 7  | 25 | 22 | 3  | 22 | 9  | 10  | 13 | 1.08055619  | 0% (0.37) |
| ATP5L_HUMAN       | B3KTQ2_HUMAN |        | B3KTQ2 | cDNA FLJ38589 fis, clone HCHON2010074, highly similar to LACTADHERIN                                                                                                                                                | 42 kDa  | 0.51  | 53  | 27  | 26  | 9  | 4  | 3  | 11 | 8  | 2  | 6   | 10 | 1.080004332 | 0% (0.44) |
| TMX4_HUMAN        | OSBL8_HUMAN  | OSBPL8 | Q9BZF1 | Oxysterol-binding protein-related protein 8 (ORP-8) (OSBP-related protein 8)                                                                                                                                        | 101 kDa | 0.17  | 49  | 25  | 24  | 9  | 7  | 8  | 1  | 0  | 3  | 14  | 6  | 1.076981349 | 0% (0.45) |
| A8K309_HUMAN      | AT2A3_HUMAN  | ATP2A3 | Q93084 | Sarcoplasmic/endoplasmic reticulum calcium ATPase 3 (SERCA3) (SR Ca(2+)-ATPase 3) (EC 3.6.3.8) (Calcium pump 3)                                                                                                     | 114 kDa | 0.17  | 50  | 25  | 24  | 0  | 7  | 10 | 4  | 4  | 0  | 0   | 12 | 1.076981349 | 0% (0.45) |
| B3KWW5_HUMAN (+3) | B4DTA2_HUMAN |        | B4DTA2 | cDNA FLJ6148, highly similar to Homo sapiens heterogeneous nuclear ribonucleoprotein D-like                                                                                                                         | 30 kDa  | 0.13  | 97  | 50  | 48  | 7  | 19 | 12 | 12 | 16 | 0  | 22  | 6  | 1.075966923 | 0% (0.39) |

|                  |              |         |        |                                                                                                                                                                                      |         |        |     |     |     |    |    |    |    |    |    |    |    |             |           |
|------------------|--------------|---------|--------|--------------------------------------------------------------------------------------------------------------------------------------------------------------------------------------|---------|--------|-----|-----|-----|----|----|----|----|----|----|----|----|-------------|-----------|
|                  |              |         |        | (HNRPDL), transcript variant 2, mRNA                                                                                                                                                 |         |        |     |     |     |    |    |    |    |    |    |    |    |             |           |
| UBA6_HUMAN       | B4DVY2_HUMAN |         | B4DVY2 | cDNA FLJ54184, highly similar to Tropomyosin alpha-4 chain                                                                                                                           | 26 kDa  | 0.1    | 46  | 24  | 23  | 0  | 5  | 8  | 8  | 4  | 4  | 7  | 7  | 1.075290479 | 0% (0.46) |
| CKAP5_HUMAN      | K6PL_HUMAN   | PFKL    | P17858 | 6-phosphofructokinase, liver type (EC 2.7.1.11) (Phosphofructo-1-kinase isozyme B) (PFK-B) (Phosphofructokinase 1) (Phosphohexokinase)                                               | 85 kDa  | 0.043  | 93  | 48  | 46  | 2  | 17 | 15 | 14 | 17 | 15 | 12 | 2  | 1.074189238 | 0% (0.40) |
| A4D2Q0_HUMAN     | MPCP_HUMAN   | SLC25A3 | Q00325 | Phosphate carrier protein, mitochondrial (Phosphate transport protein) (PTP) (Solute carrier family 25 member 3)                                                                     | 40 kDa  | 0.1    | 235 | 120 | 115 | 42 | 27 | 23 | 28 | 28 | 29 | 28 | 32 | 1.073558732 | 0% (0.31) |
| J3KN16_HUMAN     | ECHP_HUMAN   | EHHADH  | Q08426 | Peroxisomal bifunctional enzyme (PBE) (PBFE) [Includes: Enoyl-CoA hydratase/3,2-trans-enoyl-CoA isomerase (EC 4.2.1.17) (EC 5.3.3.8); 3-hydroxyacyl-CoA dehydrogenase (EC 1.1.1.35)] | 79 kDa  | 0.039  | 43  | 22  | 21  | 3  | 8  | 10 | 1  | 5  | 1  | 5  | 10 | 1.071472829 | 0% (0.47) |
| J3QQQ9_HUMAN(+4) | B2RAK1_HUMAN |         | B2RAK1 | cDNA, FL194965, highly similar to Homo sapiens leucyl/cystinyl aminopeptidase (LNPEP), mRNA                                                                                          | 117 kDa | 0.46   | 43  | 22  | 21  | 10 | 6  | 4  | 2  | 3  | 1  | 7  | 10 | 1.071472829 | 0% (0.47) |
| PSB1_HUMAN(+1)   | B3KR70_HUMAN |         | B3KR70 | cDNA FLJ33764 fis, clone BRCOC2000360, highly similar to Vacuolar ATP synthase subunit S1 (EC 3.6.3.14)                                                                              | 48 kDa  | 0.13   | 43  | 22  | 21  | 5  | 5  | 6  | 6  | 3  | 0  | 9  | 9  | 1.071472829 | 0% (0.47) |
| ALG11_HUMAN      | B2RBA6_HUMAN |         | B2RBA6 | cDNA, FL195407, highly similar to Homo sapiens MCM7 minichromosome maintenance deficient 7 (S. cerevisiae) (MCM7), mRNA                                                              | 81 kDa  | 0.083  | 43  | 22  | 21  | 0  | 10 | 13 | 0  | 12 | 3  | 5  | 0  | 1.071472829 | 0% (0.47) |
| Q6PK82_HUMAN     | B4DGU4_HUMAN | CTNNB1  | B4DGU4 | Catenin beta-1 (cDNA FLJ57878, highly similar to Beta-catenin)                                                                                                                       | 85 kDa  | 0.091  | 89  | 45  | 43  | 14 | 14 | 9  | 8  | 16 | 2  | 16 | 9  | 1.071234998 | 0% (0.41) |
| B2R679_HUMAN(+2) | D3DSQ1_HUMAN | ASAH1   | D3DSQ1 | N-acylsphingosine amidohydrolase (Acid ceramidase) 1, isoform CRA_c                                                                                                                  | 61 kDa  | 0.25   | 131 | 67  | 64  | 19 | 17 | 14 | 17 | 5  | 9  | 19 | 31 | 1.070457731 | 0% (0.37) |
| NBAS_HUMAN       | MLEC_HUMAN   | MLEC    | Q14165 | Malectin                                                                                                                                                                             | 32 kDa  | 0.0089 | 86  | 44  | 42  | 16 | 9  | 9  | 10 | 8  | 12 | 8  | 15 | 1.070163354 | 0% (0.41) |
| ITPR2_HUMAN      | NSDHL_HUMAN  | NSDHL   | Q15738 | Sterol-4-alpha-carboxylate 3-dehydrogenase, decarboxylating (EC 1.1.1.170) (Protein H105e3)                                                                                          | 42 kDa  | 0.044  | 41  | 21  | 20  | 8  | 2  | 5  | 6  | 6  | 5  | 3  | 6  | 1.069306867 | 0% (0.47) |
| TR150_HUMAN      | DNJB1_HUMAN  | DNJB1   | P25685 | DnaJ homolog subfamily B member 1 (DnaJ protein homolog 1) (Heat shock 40 kDa protein 1) (HSP40) (Heat shock protein 40) (Human DnaJ protein 1) (hDj-1)                              | 38 kDa  | 0.058  | 41  | 21  | 20  | 3  | 5  | 4  | 9  | 5  | 8  | 2  | 6  | 1.069306867 | 0% (0.47) |
| CSTF3_HUMAN      | B1AVQ5_HUMAN | MUC1    | B1AVQ5 | Mucin-1 subunit alpha                                                                                                                                                                | 49 kDa  | 0.063  | 41  | 21  | 20  | 10 | 2  | 3  | 6  | 8  | 0  | 4  | 8  | 1.069306867 | 0% (0.47) |
| SQSTM_HUMAN      | SYIM_HUMAN   | IARS2   | Q9NSE4 | Isoleucine--tRNA ligase, mitochondrial (EC 6.1.1.5) (Isoleucyl-tRNA synthetase) (IleRS)                                                                                              | 114 kDa | 0.14   | 166 | 85  | 81  | 27 | 22 | 16 | 22 | 26 | 12 | 19 | 24 | 1.067761467 | 0% (0.36) |
| RM39_HUMAN       | K6PP_HUMAN   | PFKP    | Q01813 | 6-phosphofructokinase type C (EC 2.7.1.11) (6-phosphofructokinase, platelet type) (Phosphofructo-1-kinase isozyme C) (PFK-C) (Phosphofructokinase 1) (Phosphohexokinase)             | 86 kDa  | 0.11   | 123 | 63  | 60  | 11 | 19 | 15 | 17 | 20 | 18 | 16 | 6  | 1.067387102 | 0% (0.39) |
| B4DDP6_HUMAN(+2) | Q53GF9_HUMAN |         | Q53GF9 | Full-length cDNA 5-PRIME end of clone CS0DF13YM24 of Fetal brain of Homo sapiens (Human) variant (Fragment)                                                                          | 26 kDa  | 0.081  | 125 | 63  | 60  | 17 | 13 | 14 | 19 | 10 | 19 | 13 | 19 | 1.067387102 | 0% (0.39) |
| E7ES33_HUMAN     | B9EGQ8_HUMAN | SMARCA4 | B9EGQ8 | SMARCA4 protein                                                                                                                                                                      | 189 kDa | 0.099  | 39  | 20  | 19  | 6  | 6  | 5  | 3  | 4  | 0  | 9  | 6  | 1.066937212 | 0% (0.48) |
| APOA1_HUMAN      | B4DZF2_HUMAN |         | B4DZF2 | cDNA FLJ59571, highly similar to Eukaryotic translation initiation factor 4gamma 2                                                                                                   | 110 kDa | 0.3    | 39  | 20  | 19  | 0  | 6  | 10 | 4  | 7  | 4  | 6  | 1  | 1.066937212 | 0% (0.48) |



|                   |              |        |        |                                                                                                                                                                                                                                                                                              |         |       |     |    |    |    |    |    |    |    |    |    |    |             |           |
|-------------------|--------------|--------|--------|----------------------------------------------------------------------------------------------------------------------------------------------------------------------------------------------------------------------------------------------------------------------------------------------|---------|-------|-----|----|----|----|----|----|----|----|----|----|----|-------------|-----------|
| GCSP_HUMAN        | H0Y8C6_HUMAN | IPO5   | H0Y8C6 | Importin-5 (Fragment)                                                                                                                                                                                                                                                                        | 124 kDa | 0.13  | 81  | 41 | 39 | 19 | 11 | 9  | 2  | 12 | 9  | 14 | 5  | 1.06664454  | 0% (0.42) |
| RL35_HUMAN        | H3BLZ8_HUMAN | DDX17  | H3BLZ8 | Probable ATP-dependent RNA helicase DDX17                                                                                                                                                                                                                                                    | 80 kDa  | 0.19  | 157 | 81 | 77 | 17 | 23 | 23 | 20 | 20 | 17 | 21 | 19 | 1.065229553 | 0% (0.37) |
| K7ELW0_HUMAN (+1) | TMX1_HUMAN   | TMX1   | Q9H3N1 | Thioredoxin-related transmembrane protein 1 (Thioredoxin domain-containing protein 1) (Transmembrane Trx-related protein)                                                                                                                                                                    | 32 kDa  | 0.42  | 37  | 19 | 18 | 6  | 5  | 4  | 4  | 3  | 5  | 5  | 5  | 1.064333686 | 0% (0.49) |
| COX5A_HUMAN (+1)  | C9JL16_HUMAN | RPS27L | C9JL16 | 40S ribosomal protein S27                                                                                                                                                                                                                                                                    | 11 kDa  | 0.15  | 37  | 19 | 18 | 7  | 4  | 5  | 3  | 5  | 2  | 5  | 6  | 1.064333686 | 0% (0.49) |
| Q96K24_HUMAN      | B4DSQ5_HUMAN |        | B4DSQ5 | cDNA FLJ53608, highly similar to Protein transport protein Sec23A                                                                                                                                                                                                                            | 83 kDa  | 0.19  | 37  | 19 | 18 | 5  | 2  | 6  | 6  | 3  | 5  | 4  | 6  | 1.064333686 | 0% (0.49) |
| A8K6K7_HUMAN (+1) | B7ZB41_HUMAN |        | B7ZB41 | cDNA, FLJ79405, highly similar to Homo sapiens solute carrier family 25, member 24, transcript variant 1, mRNA                                                                                                                                                                               | 53 kDa  | 0.12  | 149 | 77 | 73 | 27 | 14 | 12 | 23 | 13 | 18 | 16 | 26 | 1.062439491 | 0% (0.38) |
| KAT3_HUMAN        | GSTK1_HUMAN  | GSTK1  | Q9Y2Q3 | Glutathione S-transferase kappa 1 (EC 2.5.1.18) (GST 13-13) (GST class-kappa) (GSTK1-1) (hGSTK1) (Glutathione S-transferase subunit 13)                                                                                                                                                      | 25 kDa  | 0.18  | 184 | 95 | 90 | 27 | 20 | 17 | 31 | 26 | 15 | 20 | 30 | 1.061524464 | 0% (0.36) |
| G3V2S6_HUMAN (+2) | Q53EY4_HUMAN |        | Q53EY4 | RAB31, member RAS oncogene family variant (Fragment)                                                                                                                                                                                                                                         | 22 kDa  | 0.21  | 35  | 18 | 17 | 4  | 9  | 4  | 1  | 0  | 5  | 4  | 8  | 1.061459843 | 0% (0.50) |
| B3KME2_HUMAN (+3) | ACAD9_HUMAN  | ACAD9  | Q9H845 | Acyl-CoA dehydrogenase family member 9, mitochondrial (ACAD-9) (EC 1.3.99.-)                                                                                                                                                                                                                 | 69 kDa  | 0.17  | 106 | 55 | 52 | 23 | 15 | 10 | 7  | 20 | 3  | 14 | 15 | 1.059938652 | 0% (0.41) |
| Q6IBU0_HUMAN      | SC22B_HUMAN  | SEC22B | Q75396 | Vesicle-trafficking protein SEC22b (ER-Golgi SNARE of 24 kDa) (ERS-24) (ERS24) (SEC22 vesicle-trafficking protein homolog B) (SEC22 vesicle-trafficking protein-like 1)                                                                                                                      | 25 kDa  | 0.084 | 105 | 54 | 51 | 12 | 16 | 17 | 9  | 14 | 7  | 12 | 18 | 1.058856211 | 0% (0.42) |
| B4DLN7_HUMAN      | G3V0I5_HUMAN | NDUFV1 | G3V0I5 | NADH dehydrogenase (Ubiquinone) flavoprotein 1, 51kDa, isoform CRA_c (NADH dehydrogenase [ubiquinone] flavoprotein 1, mitochondrial)                                                                                                                                                         | 50 kDa  | 0.17  | 69  | 35 | 33 | 13 | 8  | 6  | 8  | 11 | 7  | 10 | 6  | 1.057862204 | 0% (0.45) |
| NDUA6_HUMAN       | UBR4_HUMAN   | UBR4   | Q5T4S7 | E3 ubiquitin-protein ligase UBR4 (EC 6.3.2.-) (600 kDa retinoblastoma protein-associated factor) (N-recognition-4) (Retinoblastoma-associated factor of 600 kDa) (RBAF600) (p600) (Zinc finger UBR1-type protein 1)                                                                          | 574 kDa | 0.32  | 31  | 16 | 15 | 0  | 3  | 11 | 2  | 7  | 4  | 5  | 0  | 1.054713159 | 0% (0.51) |
| A8MXB9_HUMAN      | B4DJP7_HUMAN | SNRPD3 | B4DJP7 | Small nuclear ribonucleoprotein Sm D3 (cDNA FLJ51872, highly similar to Small nuclear ribonucleoprotein Sm D3)                                                                                                                                                                               | 13 kDa  | 0.18  | 31  | 16 | 15 | 5  | 4  | 5  | 4  | 2  | 5  | 4  | 4  | 1.054713159 | 0% (0.51) |
| HINT2_HUMAN       | SPTC1_HUMAN  | SPTLC1 | O15269 | Serine palmitoyltransferase 1 (EC 2.3.1.50) (Long chain base biosynthesis protein 1) (LCB 1) (Serine-palmitoyl-CoA transferase 1) (SPT 1) (SPT1)                                                                                                                                             | 53 kDa  | 0.29  | 31  | 16 | 15 | 7  | 6  | 2  | 1  | 3  | 4  | 3  | 5  | 1.054713159 | 0% (0.51) |
| TRA2A_HUMAN       | MPRI_HUMAN   | IGF2R  | P11717 | Cation-independent mannose-6-phosphate receptor (CI Man-6-P receptor) (CI-MPR) (M6PR) (300 kDa mannose 6-phosphate receptor) (MPR 300) (Insulin-like growth factor 2 receptor) (Insulin-like growth factor II receptor) (IGF-II receptor) (M6P/IGF2 receptor) (M6P/IGF2R) (CD antigen CD222) | 274 kDa | 0.082 | 65  | 33 | 31 | 11 | 12 | 9  | 1  | 4  | 7  | 10 | 10 | 1.054251781 | 0% (0.46) |
| RDH14_HUMAN       | FBRL_HUMAN   | FBL    | P22087 | rRNA 2'-O-methyltransferase fibrillar (EC 2.1.1.-) (34 kDa nucleolar scleroderma antigen)                                                                                                                                                                                                    | 34 kDa  | 0.14  | 97  | 50 | 47 | 11 | 12 | 8  | 21 | 13 | 10 | 12 | 12 | 1.054104705 | 0% (0.43) |

|                   |              |                  |        |                                                                                                                                                                                                                                                                  |         |       |      |     |     |     |     |     |     |     |     |     |     |                 |              |
|-------------------|--------------|------------------|--------|------------------------------------------------------------------------------------------------------------------------------------------------------------------------------------------------------------------------------------------------------------------|---------|-------|------|-----|-----|-----|-----|-----|-----|-----|-----|-----|-----|-----------------|--------------|
| B4DVD7_HUMAN (+2) | B5BUB5_HUMAN | SSB              | B5BUB5 | Autoantigen La (Fragment)                                                                                                                                                                                                                                        | 47 kDa  | 0.35  | 62   | 32  | 30  | 0   | 9   | 8   | 15  | 12  | 11  | 4   | 3   | 1.0522838<br>48 | 0%<br>(0.47) |
| GRB2_HUMAN (+1)   | IF4A2_HUMAN  | EIF4A2           | Q14240 | Eukaryotic initiation factor 4A-II (eIF-4A-II) (eIF4A-II) (EC 3.6.4.13) (ATP-dependent RNA helicase eIF4A-2)                                                                                                                                                     | 46 kDa  | 0.18  | 127  | 65  | 61  | 0   | 17  | 13  | 26  | 17  | 22  | 0   | 0   | 1.0520528<br>25 | 0%<br>(0.42) |
| HPRT_HUMAN (+1)   | GRP78_HUMAN  | HSPA5            | P11021 | 78 kDa glucose-regulated protein (GRP-78) (Endoplasmic reticulum luminal Ca(2+)-binding protein grp78) (Heat shock 70 kDa protein 5) (Immunoglobulin heavy chain-binding protein) (BiP)                                                                          | 72 kDa  | 0.27  | 1108 | 571 | 536 | 135 | 180 | 138 | 119 | 114 | 132 | 147 | 144 | 1.0515258<br>26 | 0%<br>(0.19) |
| PDS5A_HUMAN       | DX39B_HUMAN  | DDX39B           | Q13838 | Spliceosome RNA helicase DDX39B (EC 3.6.4.13) (56 kDa U2AF65-associated protein) (ATP-dependent RNA helicase p47) (DEAD box protein UAF56) (HLA-B-associated transcript 1 protein)                                                                               | 49 kDa  | 0.073 | 91   | 48  | 45  | 3   | 12  | 11  | 22  | 13  | 11  | 16  | 5   | 1.0514399<br>4  | 0%<br>(0.44) |
| DPYL2_HUMAN (+1)  | B7Z815_HUMAN | USP7             | B7Z815 | Ubiquitin carboxyl-terminal hydrolase (EC 3.4.19.12)                                                                                                                                                                                                             | 126 kDa | 0.25  | 29   | 15  | 14  | 0   | 4   | 4   | 7   | 1   | 2   | 7   | 2   | 1.0507173<br>64 | 0%<br>(0.52) |
| Q53FW8_HUMAN (+1) | RUXE_HUMAN   | SNRPE            | P62304 | Small nuclear ribonucleoprotein E (snRNP-E) (Sm protein E) (Sm-E) (SmE)                                                                                                                                                                                          | 11 kDa  | 0.18  | 29   | 15  | 14  | 3   | 3   | 5   | 4   | 3   | 4   | 4   | 3   | 1.0507173<br>64 | 0%<br>(0.52) |
| GNAI3_HUMAN       | ARK72_HUMAN  | AKR7A2           | O43488 | Aflatoxin B1 aldehyde reductase member 2 (EC 1.1.1.n11) (AFB1 aldehyde reductase 1) (AFB1-AR 1) (Aldoketoreductase 7) (Succinic semialdehyde reductase) (SSA reductase)                                                                                          | 40 kDa  | 0.26  | 29   | 15  | 14  | 5   | 2   | 3   | 5   | 4   | 3   | 4   | 3   | 1.0507173<br>64 | 0%<br>(0.52) |
| RM38_HUMAN        | B4DRA0_HUMAN |                  | B4DRA0 | cDNA FLJ58459, highly similar to RNA-binding region-containing protein 2                                                                                                                                                                                         | 56 kDa  | 0.092 | 90   | 46  | 43  | 0   | 14  | 13  | 20  | 11  | 6   | 16  | 10  | 1.0485498<br>78 | 0%<br>(0.45) |
| VP26A_HUMAN       | RAB14_HUMAN  | RAB14            | P61106 | Ras-related protein Rab-14                                                                                                                                                                                                                                       | 24 kDa  | 0.25  | 177  | 91  | 85  | 25  | 21  | 24  | 21  | 16  | 25  | 20  | 24  | 1.0468432<br>86 | 0%<br>(0.40) |
| B2R6X2_HUMAN (+1) | DNM1L_HUMAN  | DNM1L            | O00429 | Dynamin-1-like protein (EC 3.6.5.5) (Dnm1p/Vps1p-like protein) (DVLp) (Dynamin family member proline-rich carboxyl-terminal domain less) (Dymple) (Dynamin-like protein) (Dynamin-like protein 4) (Dynamin-like protein IV) (HdynIV) (Dynamin-related protein 1) | 82 kDa  | 0.061 | 27   | 14  | 13  | 1   | 5   | 4   | 4   | 2   | 8   | 1   | 2   | 1.0461977<br>56 | 0%<br>(0.53) |
| J3KQ32_HUMAN (+1) | SEP15_HUMAN  | 42248            | O60613 | 15 kDa selenoprotein                                                                                                                                                                                                                                             | 18 kDa  | 0.19  | 27   | 14  | 13  | 2   | 4   | 6   | 2   | 2   | 3   | 3   | 5   | 1.0461977<br>56 | 0%<br>(0.53) |
| A8K2I7_HUMAN (+1) | AL9A1_HUMAN  | ALDH9A1          | P49189 | 4-trimethylaminobutyraldehyde dehydrogenase (TMABADH) (EC 1.2.1.47) (Aldehyde dehydrogenase E3 isozyme) (Aldehyde dehydrogenase family 9 member A1) (EC 1.2.1.3) (Gamma-aminobutyraldehyde dehydrogenase) (EC 1.2.1.19) (R-aminobutyraldehyde dehydrogenase)     | 54 kDa  | 0.22  | 56   | 29  | 27  | 4   | 9   | 7   | 9   | 12  | 9   | 4   | 2   | 1.0456000<br>67 | 0%<br>(0.48) |
| NDUB4_HUMAN       | PSD13_HUMAN  | PSMD13           | Q9UNM6 | 26S proteasome non-ATPase regulatory subunit 13 (26S proteasome regulatory subunit RPN9) (26S proteasome regulatory subunit S11) (26S proteasome regulatory subunit p40.5)                                                                                       | 43 kDa  | 0.18  | 84   | 44  | 41  | 3   | 14  | 6   | 21  | 11  | 15  | 12  | 3   | 1.0454046<br>46 | 0%<br>(0.46) |
| ICT1_HUMAN        | M1VPF6_HUMAN | CD74-ROS1_C6;R32 | M1VPF6 | Tyrosine-protein kinase receptor (EC 2.7.10.1)                                                                                                                                                                                                                   | 91 kDa  | 0.13  | 85   | 44  | 41  | 11  | 12  | 10  | 11  | 8   | 6   | 10  | 17  | 1.0454046<br>46 | 0%<br>(0.46) |
| Q6LEU8_HUMAN      | A2A274_HUMAN | ACO2             | A2A274 | Aconitase hydratase, mitochondrial                                                                                                                                                                                                                               | 88 kDa  | 0.12  | 229  | 119 | 111 | 36  | 36  | 34  | 12  | 39  | 13  | 28  | 31  | 1.0451928<br>22 | 0%<br>(0.38) |
| B7ZKM0_HUMAN (+1) | B2R6J2_HUMAN |                  | B2R6J2 | cDNA, FLJ92973, highly similar to Homo sapiens villin 2 (ezrin) (VIL2), mRNA                                                                                                                                                                                     | 69 kDa  | 0.086 | 169  | 88  | 82  | 33  | 20  | 18  | 19  | 22  | 20  | 21  | 19  | 1.0443906<br>02 | 0%<br>(0.41) |
| LY75_HUMAN        | HM13_HUMAN   | HM13             | Q8TCT9 | Minor histocompatibility antigen H13 (EC 3.4.23.-)                                                                                                                                                                                                               | 41 kDa  | 0.064 | 112  | 58  | 54  | 17  | 18  | 12  | 11  | 9   | 12  | 12  | 21  | 1.0440548<br>72 | 0%<br>(0.44) |

|                     |              |        |        |                                                                                                                                                                                                                                                                                                                                                                                                    |        |       |     |     |     |    |    |    |    |    |    |    |    |             |    |        |
|---------------------|--------------|--------|--------|----------------------------------------------------------------------------------------------------------------------------------------------------------------------------------------------------------------------------------------------------------------------------------------------------------------------------------------------------------------------------------------------------|--------|-------|-----|-----|-----|----|----|----|----|----|----|----|----|-------------|----|--------|
|                     |              |        |        | (Intramembrane protease 1)<br>(IMP-1) (IMPAS-1) (hIMP1)<br>(Presenilin-like protein 3)<br>(Signal peptide peptidase)                                                                                                                                                                                                                                                                               |        |       |     |     |     |    |    |    |    |    |    |    |    |             |    |        |
| HXK3_HUMAN          | GRHPR_HUMAN  | GRHPR  | Q9UBQ7 | Glyoxylate reductase/hydroxypyruvate reductase (EC 1.1.1.79) (EC 1.1.1.81)                                                                                                                                                                                                                                                                                                                         | 36 kDa | 0.15  | 54  | 28  | 26  | 3  | 11 | 4  | 10 | 12 | 5  | 4  | 4  | 1.043067701 | 0% | (0.49) |
| C9J19_HUMAN (+1)    | RT29_HUMAN   | DAP3   | P51398 | 28S ribosomal protein S29, mitochondrial (MRP-S29) (S29mt) (Death-associated protein 3) (DAP-3) (Ionizing radiation resistance conferring protein)                                                                                                                                                                                                                                                 | 46 kDa | 0.1   | 54  | 28  | 26  | 8  | 8  | 5  | 7  | 9  | 4  | 5  | 8  | 1.043067701 | 0% | (0.49) |
| B4DJA5_HUMAN (+1)   | SYK_HUMAN    | KARS   | Q15046 | Lysine-tRNA ligase (EC 6.1.1.6) (Lysyl-tRNA synthetase) (LysRS)                                                                                                                                                                                                                                                                                                                                    | 68 kDa | 0.36  | 81  | 42  | 39  | 5  | 20 | 14 | 4  | 17 | 7  | 11 | 4  | 1.041968844 | 0% | (0.47) |
| ABCF1_HUMAN         | MNDA_HUMAN   | MNDA   | P41218 | Myeloid cell nuclear differentiation antigen                                                                                                                                                                                                                                                                                                                                                       | 46 kDa | 0.05  | 25  | 13  | 12  | 0  | 4  | 4  | 5  | 0  | 8  | 4  | 1  | 1.041044059 | 0% | (0.54) |
| Q9HBK7_HUMAN (+1)   | A8K2Q6_HUMAN |        | A8K2Q6 | Peptidyl-prolyl cis-trans isomerase (EC 5.2.1.8)                                                                                                                                                                                                                                                                                                                                                   | 23 kDa | 0.074 | 25  | 13  | 12  | 2  | 4  | 3  | 4  | 4  | 1  | 2  | 5  | 1.041044059 | 0% | (0.54) |
| B2RCZ4_HUMAN (+2)   | B4DP80_HUMAN |        | B4DP80 | cDNA FLJ56357, highly similar to Homo sapiens apolipoprotein A-1 binding protein (APOA1BP), mRNA                                                                                                                                                                                                                                                                                                   | 34 kDa | 0.11  | 25  | 13  | 12  | 2  | 3  | 1  | 7  | 3  | 4  | 2  | 3  | 1.041044059 | 0% | (0.54) |
| B2R4G1_HUMAN (+3)   | B4DVD7_HUMAN | EIF3K  | B4DVD7 | Eukaryotic translation initiation factor 3 subunit K (eIF3K) (Eukaryotic translation initiation factor 3 subunit 12) (eIF-3 p25)                                                                                                                                                                                                                                                                   | 25 kDa | 0.29  | 24  | 13  | 12  | 2  | 4  | 2  | 5  | 2  | 6  | 3  | 1  | 1.041044059 | 0% | (0.54) |
| A0SBM6_HUMAN (+202) | ABCB7_HUMAN  | ABCB7  | O75027 | ATP-binding cassette sub-family B member 7, mitochondrial (ATP-binding cassette transporter 7) (ABC transporter 7 protein)                                                                                                                                                                                                                                                                         | 83 kDa | 0.12  | 25  | 13  | 12  | 4  | 2  | 2  | 5  | 5  | 3  | 2  | 2  | 1.041044059 | 0% | (0.54) |
| B5BU01_HUMAN (+1)   | ACSF2_HUMAN  | ACSF2  | Q96CM8 | Acyl-CoA synthetase family member 2, mitochondrial (EC 6.2.1.-)                                                                                                                                                                                                                                                                                                                                    | 68 kDa | 0.14  | 52  | 27  | 25  | 13 | 6  | 4  | 4  | 10 | 3  | 5  | 7  | 1.040356175 | 0% | (0.50) |
| Q3KQZ2_HUMAN (+1)   | ACTBL_HUMAN  | ACTBL2 | Q562R1 | Beta-actin-like protein 2 (Kappa-actin)                                                                                                                                                                                                                                                                                                                                                            | 42 kDa | 0.13  | 321 | 168 | 156 | 42 | 46 | 37 | 45 | 33 | 39 | 53 | 33 | 1.040315045 | 0% | (0.37) |
| RAC2_HUMAN          | B2RBD5_HUMAN |        | B2RBD5 | cDNA FLJ95457, highly similar to Homo sapiens tubulin, beta, 4 (TUBB4), mRNA                                                                                                                                                                                                                                                                                                                       | 50 kDa | 0.2   | 431 | 224 | 208 | 72 | 54 | 50 | 49 | 0  | 57 | 0  | 52 | 1.040198009 | 0% | (0.34) |
| AL5AP_HUMAN         | SAM50_HUMAN  | SAMM50 | Q9Y512 | Sorting and assembly machinery component 50 homolog (Transformation-related gene 3 protein) (TRG-3)                                                                                                                                                                                                                                                                                                | 52 kDa | 0.27  | 80  | 41  | 38  | 13 | 8  | 3  | 17 | 10 | 15 | 6  | 7  | 1.040129084 | 0% | (0.47) |
| GAK_HUMAN           | AATM_HUMAN   | GOT2   | P00505 | Aspartate aminotransferase, mitochondrial (mAspAT) (EC 2.6.1.1) (EC 2.6.1.7) (Fatty acid-binding protein) (FABP-1) (Glutamate oxaloacetate transaminase 2) (Kynurenine aminotransferase 4) (Kynurenine aminotransferase IV) (Kynurenine--oxoglutarate transaminase 4) (Kynurenine--oxoglutarate transaminase IV) (Plasma membrane-associated fatty acid-binding protein) (FABPpm) (Transaminase A) | 48 kDa | 0.076 | 181 | 95  | 88  | 26 | 24 | 21 | 24 | 41 | 13 | 13 | 20 | 1.038228267 | 0% | (0.42) |
| B5BU72_HUMAN        | PLD3_HUMAN   | PLD3   | Q8IV08 | Phospholipase D3 (PLD 3) (EC 3.1.4.4) (Choline phosphatase 3) (HindIII K4L homolog) (Hu-K4) (Phosphatidylcholine-hydrolyzing phospholipase D3)                                                                                                                                                                                                                                                     | 55 kDa | 0.15  | 49  | 26  | 24  | 5  | 8  | 5  | 8  | 2  | 5  | 10 | 7  | 1.037445764 | 0% | (0.50) |
| MIPEP_HUMAN         | AAA_S_HUMAN  | AAA_S  | Q9NRG9 | Aladin (Adracalin)                                                                                                                                                                                                                                                                                                                                                                                 | 60 kDa | 0.073 | 50  | 26  | 24  | 11 | 7  | 4  | 4  | 7  | 9  | 3  | 5  | 1.037445764 | 0% | (0.50) |
| TMED4_HUMAN         | PGAM1_HUMAN  | PGAM1  | P18669 | Phosphoglycerate mutase 1 (EC 3.1.3.13) (EC 5.4.2.11) (EC 5.4.2.4) (BPG-dependent PGAM 1) (Phosphoglycerate mutase isozyme B) (PGAM-B)                                                                                                                                                                                                                                                             | 29 kDa | 0.2   | 50  | 26  | 24  | 6  | 7  | 4  | 10 | 5  | 9  | 8  | 2  | 1.037445764 | 0% | (0.50) |
| AIMP2_HUMAN (+1)    | STML2_HUMAN  | STOML2 | Q9UJZ1 | Stomatol-like protein 2, mitochondrial (SLP-2)                                                                                                                                                                                                                                                                                                                                                     | 39 kDa | 0.12  | 50  | 26  | 24  | 5  | 7  | 8  | 6  | 7  | 7  | 5  | 5  | 1.037445764 | 0% | (0.50) |



|                   |              |           |        |                                                                                                                                                                                                                                                                |         |       |     |     |     |    |    |    |    |    |    |    |    |             |           |
|-------------------|--------------|-----------|--------|----------------------------------------------------------------------------------------------------------------------------------------------------------------------------------------------------------------------------------------------------------------|---------|-------|-----|-----|-----|----|----|----|----|----|----|----|----|-------------|-----------|
| RAB4B_HUMAN       | Q6FGX3_HUMAN | RAB6A     | Q6FGX3 | RAB6A protein                                                                                                                                                                                                                                                  | 24 kDa  | 0.35  | 93  | 48  | 44  | 14 | 12 | 10 | 12 | 8  | 14 | 9  | 13 | 1.028691297 | 0% (0.48) |
| PDXK_HUMAN        | B4DVE1_HUMAN |           | B4DVE1 | cDNA FLJ53478, highly similar to Galectin-3-binding protein                                                                                                                                                                                                    | 64 kDa  | 0.11  | 115 | 60  | 55  | 22 | 8  | 11 | 19 | 8  | 21 | 15 | 11 | 1.028231524 | 0% (0.47) |
| B4DLB8_HUMAN (+3) | COX5A_HUMAN  | COX5A     | P20674 | Cytochrome c oxidase subunit 5A, mitochondrial (Cytochrome c oxidase polypeptide Va)                                                                                                                                                                           | 17 kDa  | 0.056 | 21  | 11  | 10  | 4  | 2  | 3  | 2  | 2  | 2  | 2  | 4  | 1.028213247 | 0% (0.56) |
| Q86XM2_HUMAN      | RAC2_HUMAN   | RAC2      | P15153 | Ras-related C3 botulinum toxin substrate 2 (GX) (Small G protein) (p21-Rac2)                                                                                                                                                                                   | 21 kDa  | 0.074 | 20  | 11  | 10  | 3  | 2  | 4  | 1  | 0  | 2  | 3  | 5  | 1.028213247 | 0% (0.56) |
| ELYS_HUMAN        | B7Z611_HUMAN |           | B7Z611 | cDNA FLJ50848, highly similar to Homo sapiens suppressor of var1, 3-like 1 (S. cerevisiae) (SUPV3L1), mRNA (Fragment)                                                                                                                                          | 71 kDa  | 0.015 | 21  | 11  | 10  | 1  | 3  | 5  | 2  | 5  | 3  | 2  | 0  | 1.028213247 | 0% (0.56) |
| A8K2U2_HUMAN (+3) | RM49_HUMAN   | MRPL49    | Q13405 | 39S ribosomal protein L49, mitochondrial (L49mt) (MRP-L49) (Neighbor of FAU) (NOF) (Protein NOF1)                                                                                                                                                              | 19 kDa  | 0.18  | 21  | 11  | 10  | 4  | 2  | 3  | 2  | 2  | 1  | 6  | 1  | 1.028213247 | 0% (0.56) |
| LRC8A_HUMAN       | H7C579_HUMAN | NIT2      | H7C579 | Omega-amidase NIT2 (Fragment)                                                                                                                                                                                                                                  | 29 kDa  | 0.096 | 21  | 11  | 10  | 0  | 3  | 3  | 5  | 2  | 6  | 2  | 0  | 1.028213247 | 0% (0.56) |
| B4E3I3_HUMAN (+2) | MUTA_HUMAN   | MUT       | P22033 | Methylmalonyl-CoA mutase, mitochondrial (MCM) (EC 5.4.99.2) (Methylmalonyl-CoA isomerase)                                                                                                                                                                      | 83 kDa  | 0.12  | 43  | 23  | 21  | 7  | 6  | 5  | 4  | 13 | 1  | 4  | 3  | 1.027275181 | 0% (0.52) |
| ANT3_HUMAN        | RS7_HUMAN    | RPS7      | P62081 | 40S ribosomal protein S7                                                                                                                                                                                                                                       | 22 kDa  | 0.065 | 44  | 23  | 21  | 6  | 4  | 7  | 6  | 7  | 8  | 3  | 3  | 1.027275181 | 0% (0.52) |
| ALG2_HUMAN        | Q59GK9_HUMAN |           | Q59GK9 | Ribosomal protein L21 variant (Fragment)                                                                                                                                                                                                                       | 19 kDa  | 0.094 | 44  | 23  | 21  | 6  | 6  | 5  | 6  | 5  | 6  | 4  | 6  | 1.027275181 | 0% (0.52) |
| FABD_HUMAN        | B4E1G2_HUMAN |           | B4E1G2 | Serine hydroxymethyltransferase (EC 2.1.2.1)                                                                                                                                                                                                                   | 49 kDa  | 0.11  | 252 | 131 | 120 | 31 | 34 | 30 | 38 | 42 | 30 | 24 | 25 | 1.026527228 | 0% (0.43) |
| E5KSE7_HUMAN      | UGGG1_HUMAN  | UGGT1     | Q9NYU2 | UDP-glucose:glycoprotein glucosyltransferase 1 (UGT1) (hUGT1) (EC 2.4.1.-) (UDP-Glc:glycoprotein glucosyltransferase) (UDP-glucose ceramide glucosyltransferase-like 1)                                                                                        | 177 kDa | 0.16  | 225 | 117 | 107 | 29 | 34 | 31 | 23 | 21 | 22 | 23 | 41 | 1.024962693 | 0% (0.44) |
| WDR36_HUMAN       | COPG1_HUMAN  | COPG1     | Q9Y678 | Coatomer subunit gamma-1 (Gamma-1-coat protein) (Gamma-1-COP)                                                                                                                                                                                                  | 98 kDa  | 0.13  | 88  | 46  | 42  | 3  | 15 | 12 | 16 | 10 | 20 | 10 | 2  | 1.024839085 | 0% (0.49) |
| B4DVY2_HUMAN (+1) | F6IQY8_HUMAN | HLA-A     | F6IQY8 | MHC class I antigen (Fragment)                                                                                                                                                                                                                                 | 38 kDa  | 0.3   | 88  | 46  | 42  | 0  | 12 | 8  | 16 | 0  | 0  | 0  | 21 | 1.024839085 | 0% (0.49) |
| BPHL_HUMAN        | C1PHA2_HUMAN | KIF5B-ALK | C1PHA2 | Tyrosine-protein kinase receptor (EC 2.7.10.1)                                                                                                                                                                                                                 | 168 kDa | 0.25  | 42  | 22  | 20  | 7  | 7  | 6  | 2  | 2  | 8  | 7  | 3  | 1.023302023 | 0% (0.53) |
| A6NFX8_HUMAN (+1) | NUCL_HUMAN   | NCL       | P19338 | Nucleolin (Protein C23)                                                                                                                                                                                                                                        | 77 kDa  | 0.3   | 216 | 113 | 103 | 7  | 33 | 36 | 37 | 31 | 26 | 30 | 16 | 1.021641399 | 0% (0.45) |
| A8K968_HUMAN (+1) | AT2A2_HUMAN  | ATP2A2    | P16615 | Sarcoplasmic/endoplasmic reticulum calcium ATPase 2 (SERCA2) (SR Ca(2+)-ATPase 2) (EC 3.6.3.8) (Calcium pump 2) (Calcium-transporting ATPase sarcoplasmic reticulum type, slow twitch skeletal muscle isoform) (Endoplasmic reticulum class 1/2 Ca(2+) ATPase) | 115 kDa | 0.041 | 237 | 124 | 113 | 46 | 32 | 30 | 16 | 21 | 14 | 33 | 45 | 1.021311448 | 0% (0.45) |
| A7J992_HUMAN (+1) | NUMA1_HUMAN  | NUMA1     | Q14980 | Nuclear mitotic apparatus protein 1 (NuMA protein) (SP-H antigen)                                                                                                                                                                                              | 238 kDa | 0.035 | 105 | 55  | 50  | 14 | 14 | 22 | 6  | 9  | 2  | 28 | 11 | 1.020099381 | 0% (0.49) |
| RISC_HUMAN        | NAKD2_HUMAN  | NADK2     | Q4GON4 | NAD kinase 2, mitochondrial (EC 2.7.1.23) (Mitochondrial NAD kinase) (NAD kinase domain-containing protein 1, mitochondrial)                                                                                                                                   | 49 kDa  | 0.095 | 19  | 10  | 9   | 3  | 2  | 3  | 2  | 4  | 0  | 1  | 4  | 1.020087525 | 0% (0.58) |
| ASNS_HUMAN        | PDS5A_HUMAN  | PDS5A     | Q29RF7 | Sister chromatid cohesion protein PDS5 homolog A (Cell proliferation-inducing gene 54 protein) (Sister chromatid cohesion protein 112) (SCC-112)                                                                                                               | 151 kDa | 0.22  | 19  | 10  | 9   | 1  | 2  | 2  | 5  | 4  | 0  | 5  | 0  | 1.020087525 | 0% (0.58) |
| RER1_HUMAN        | TRNT1_HUMAN  | TRNT1     | Q96Q11 | CCA tRNA nucleotidyltransferase 1, mitochondrial (EC 2.7.7.72) (Mitochondrial tRNA                                                                                                                                                                             | 50 kDa  | 0.15  | 19  | 10  | 9   | 2  | 4  | 0  | 4  | 4  | 3  | 1  | 1  | 1.020087525 | 0% (0.58) |

|                   |              |          |        |                                                                                                                                                                                                                                                                                             |         |       |     |     |    |    |    |    |    |    |    |    |    |             |           |  |
|-------------------|--------------|----------|--------|---------------------------------------------------------------------------------------------------------------------------------------------------------------------------------------------------------------------------------------------------------------------------------------------|---------|-------|-----|-----|----|----|----|----|----|----|----|----|----|-------------|-----------|--|
|                   |              |          |        | nucleotidyl transferase, CCA-adding) (mt CCA-adding enzyme) (mt tRNA CCA-diphosphorylase) (mt tRNA CCA-pyrophosphorylase) (mt tRNA adenyltransferase)                                                                                                                                       |         |       |     |     |    |    |    |    |    |    |    |    |    |             |           |  |
| B7Z611_HUMAN (+1) | PLBL1_HUMAN  | PLBD1    | Q6P4A8 | Phospholipase B-like 1 (EC 3.1.1.-) (LAMA-like protein 1) (Lamina ancestor homolog 1) (Phospholipase B domain-containing protein 1)                                                                                                                                                         | 63 kDa  | 0.15  | 19  | 10  | 9  | 1  | 4  | 4  | 1  | 0  | 3  | 3  | 3  | 1.020087525 | 0% (0.58) |  |
| F5H1S9_HUMAN      | A8K6V7_HUMAN |          | A8K6V7 | cDNA FLJ76053, highly similar to Homo sapiens Ras-GRTPase activating protein SH3 domain-binding protein 2 (G3BP2), transcript variant 3, mRNA                                                                                                                                               | 51 kDa  | 0.15  | 40  | 21  | 19 | 2  | 5  | 9  | 5  | 4  | 5  | 9  | 1  | 1.018971882 | 0% (0.54) |  |
| PPOX_HUMAN        | B3KUZ7_HUMAN |          | B3KUZ7 | cDNA FLJ40986 fis, clone UTERU2014898, highly similar to Vacuolar ATP synthase subunit H (EC 3.6.3.14)                                                                                                                                                                                      | 56 kDa  | 0.065 | 40  | 21  | 19 | 6  | 6  | 5  | 4  | 1  | 4  | 9  | 5  | 1.018971882 | 0% (0.54) |  |
| BIG2_HUMAN        | F8VXC8_HUMAN | SMARCC2  | F8VXC8 | SWI/SNF complex subunit SMARCC2                                                                                                                                                                                                                                                             | 136 kDa | 0.035 | 60  | 32  | 29 | 9  | 11 | 6  | 6  | 7  | 1  | 13 | 8  | 1.018596107 | 0% (0.52) |  |
| UTRO_HUMAN        | I3L1P8_HUMAN | SLC25A11 | I3L1P8 | Mitochondrial 2-oxoglutarate/malate carrier protein (Fragment)                                                                                                                                                                                                                              | 32 kDa  | 0.021 | 186 | 98  | 89 | 32 | 19 | 16 | 31 | 17 | 29 | 16 | 26 | 1.018102614 | 0% (0.47) |  |
| ARGI2_HUMAN       | DLDH_HUMAN   | DLD      | P09622 | Dihydropyridyl dehydrogenase, mitochondrial (EC 1.8.1.4) (Dihydropyridone dehydrogenase) (Glycine cleavage system L protein)                                                                                                                                                                | 54 kDa  | 0.22  | 206 | 108 | 98 | 28 | 24 | 24 | 32 | 32 | 23 | 20 | 23 | 1.017148483 | 0% (0.47) |  |
| ISG15_HUMAN       | PRDX5_HUMAN  | PRDX5    | P30044 | Peroxisome oxidase-5, mitochondrial (EC 1.11.1.15) (Alu corepressor 1) (Antioxidant enzyme B166) (AOEB166) (Liver tissue 2D-page spot 71B) (PLP) (Peroxisome oxidase V) (Prx-V) (Peroxisomal antioxidant enzyme) (TPx type VI) (Thioredoxin peroxidase PMP20) (Thioredoxin reductase)       | 22 kDa  | 0.37  | 119 | 63  | 57 | 21 | 12 | 8  | 22 | 14 | 12 | 13 | 18 | 1.015063076 | 0% (0.50) |  |
| A7MAP1_HUMAN      | A5YM53_HUMAN | ITGAV    | A5YM53 | ITGAV protein                                                                                                                                                                                                                                                                               | 116 kDa | 0.093 | 98  | 52  | 47 | 19 | 14 | 12 | 7  | 7  | 7  | 16 | 16 | 1.014487833 | 0% (0.51) |  |
| MK671_HUMAN       | B4E324_HUMAN |          | B4E324 | cDNA FLJ60397, highly similar to Lysosomal protective protein (EC 3.4.16.5)                                                                                                                                                                                                                 | 54 kDa  | 0.14  | 38  | 20  | 18 | 5  | 6  | 6  | 3  | 3  | 1  | 7  | 7  | 1.014234361 | 0% (0.55) |  |
| A8K329_HUMAN (+4) | HP1B3_HUMAN  | HP1BP3   | Q5SSJ5 | Heterochromatin protein 1-binding protein 3 (Protein HP1-BP74)                                                                                                                                                                                                                              | 61 kDa  | 0.082 | 38  | 20  | 18 | 7  | 2  | 6  | 6  | 7  | 2  | 3  | 6  | 1.014234361 | 0% (0.55) |  |
| DNJA1_HUMAN       | A4D210_HUMAN | EIF3B    | A4D210 | Eukaryotic translation initiation factor 3 subunit B (eIF3b) (Eukaryotic translation initiation factor 3 subunit 9) (eIF-3-eta)                                                                                                                                                             | 89 kDa  | 0.086 | 38  | 20  | 18 | 1  | 9  | 8  | 2  | 1  | 8  | 4  | 6  | 1.014234361 | 0% (0.55) |  |
| Q53G19_HUMAN (+1) | Q53HV1_HUMAN |          | Q53HV1 | Ribosomal protein S4, X-linked X isoform variant (Fragment)                                                                                                                                                                                                                                 | 30 kDa  | 0.31  | 139 | 73  | 66 | 12 | 20 | 19 | 23 | 20 | 21 | 13 | 10 | 1.014066628 | 0% (0.49) |  |
| ABCD1_HUMAN       | ODO2_HUMAN   | DLST     | P36957 | Dihydropyridyllysine-residue succinyltransferase component of 2-oxoglutarate dehydrogenase complex, mitochondrial (EC 2.3.1.61) (2-oxoglutarate dehydrogenase complex component E2) (OGDC-E2) (Dihydropyridone succinyltransferase component of 2-oxoglutarate dehydrogenase complex) (E2K) | 49 kDa  | 0.079 | 139 | 73  | 66 | 24 | 14 | 22 | 15 | 18 | 20 | 9  | 18 | 1.014066628 | 0% (0.49) |  |
| A8K9B9_HUMAN (+1) | HNRPL_HUMAN  | HNRNPL   | P14866 | Heterogeneous nuclear ribonucleoprotein L (hnRNP L)                                                                                                                                                                                                                                         | 64 kDa  | 0.18  | 178 | 94  | 85 | 11 | 31 | 31 | 22 | 22 | 12 | 37 | 14 | 1.01383272  | 0% (0.48) |  |
| ACACA_HUMAN       | A8K651_HUMAN |          | A8K651 | cDNA FLJ75700, highly similar to Homo sapiens                                                                                                                                                                                                                                               | 31 kDa  | 0.065 | 77  | 41  | 37 | 9  | 7  | 8  | 17 | 11 | 10 | 5  | 11 | 1.013614392 | 0% (0.52) |  |

|                   |              |           |        |                                                                                                                                                                                                        |         |       |     |     |     |     |    |    |     |     |    |    |     |                 |              |
|-------------------|--------------|-----------|--------|--------------------------------------------------------------------------------------------------------------------------------------------------------------------------------------------------------|---------|-------|-----|-----|-----|-----|----|----|-----|-----|----|----|-----|-----------------|--------------|
|                   |              |           |        | complement component 1, q subcomponent binding protein (C1QBP), nuclear gene encoding mitochondrial protein, mRNA                                                                                      |         |       |     |     |     |     |    |    |     |     |    |    |     |                 |              |
| APOO_HUMAN (+2)   | B3KY95_HUMAN |           | B3KY95 | cDNA FLJ16143 fis, clone BRAMY2038516, highly similar to Protein disulfide-isomerase A6 (EC 5.3.4.1)                                                                                                   | 53 kDa  | 0.22  | 237 | 125 | 113 | 27  | 35 | 33 | 31  | 25  | 34 | 22 | 32  | 1.0132088<br>14 | 0%<br>(0.48) |
| H3BV80_HUMAN      | IPYR2_HUMAN  | PPA2      | Q9H2U2 | Inorganic pyrophosphatase 2, mitochondrial (EC 3.6.1.1) (Pyrophosphatase S1D6-306) (Pyrophosphate phosphohydrolase 2) (PPase 2)                                                                        | 38 kDa  | 0.15  | 137 | 72  | 65  | 16  | 23 | 18 | 15  | 21  | 15 | 6  | 23  | 1.0126240<br>69 | 0%<br>(0.50) |
| A8K7H3_HUMAN (+2) | RHG01_HUMAN  | ARHGAP1   | Q07960 | Rho GTPase-activating protein 1 (CDC42 GTPase-activating protein) (GTPase-activating protein rhoGAP) (Rho-related small GTPase protein activator) (Rho-type GTPase-activating protein 1) (p50-RhoGAP)  | 50 kDa  | 0.38  | 57  | 30  | 27  | 6   | 5  | 7  | 12  | 2   | 13 | 8  | 4   | 1.0121278<br>56 | 0%<br>(0.53) |
| B1AKV3_HUMAN (+1) | 1433E_HUMAN  | YWHAE     | P62258 | 14-3-3 protein epsilon (14-3-3E)                                                                                                                                                                       | 29 kDa  | 0.22  | 95  | 50  | 45  | 10  | 14 | 13 | 13  | 17  | 9  | 11 | 8   | 1.0103821<br>59 | 0%<br>(0.52) |
| VPP2_HUMAN        | B4E205_HUMAN |           | B4E205 | cDNA FLJ61651, highly similar to Protein transport protein Sec24A                                                                                                                                      | 96 kDa  | 0.091 | 18  | 9   | 8   | 1   | 4  | 3  | 1   | 3   | 1  | 3  | 1   | 1.0103766<br>32 | 0%<br>(0.59) |
| G0XQ39_HUMAN (+1) | B4DEK4_HUMAN | SNX2      | B4DEK4 | Sorting nexin-2 (cDNA FLJ51799, highly similar to Sorting nexin-2)                                                                                                                                     | 46 kDa  | 0.063 | 17  | 9   | 8   | 1   | 2  | 2  | 4   | 2   | 4  | 0  | 2   | 1.0103766<br>32 | 0%<br>(0.59) |
| ARHL2_HUMAN       | B4DMR0_HUMAN |           | B4DMR0 | cDNA FLJ60706, highly similar to Serine/threonine-protein kinase 24 (EC 2.7.11.1)                                                                                                                      | 38 kDa  | 0.18  | 17  | 9   | 8   | 0   | 2  | 1  | 6   | 2   | 2  | 3  | 1   | 1.0103766<br>32 | 0%<br>(0.59) |
| URP2_HUMAN        | Q4LE60_HUMAN | TNPO2     | Q4LE60 | TNPO2 variant protein (Fragment)                                                                                                                                                                       | 118 kDa | 0.1   | 17  | 9   | 8   | 0   | 0  | 4  | 5   | 3   | 1  | 4  | 0   | 1.0103766<br>32 | 0%<br>(0.59) |
| COPZ1_HUMAN (+6)  | H2B1B_HUMAN  | HIST1H2BB | P33778 | Histone H2B type 1-B (Histone H2B.1) (Histone H2B.f) (H2B.f)                                                                                                                                           | 14 kDa  | 0.25  | 846 | 447 | 403 | 111 | 92 | 97 | 148 | 128 | 91 | 64 | 122 | 1.0097618<br>94 | 0%<br>(0.43) |
| A8K607_HUMAN (+2) | CPSF1_HUMAN  | CPSF1     | Q10570 | Cleavage and polyadenylation specificity factor subunit 1 (Cleavage and polyadenylation specificity factor 160 kDa subunit) (CPSF 160 kDa subunit)                                                     | 161 kDa | 0.12  | 37  | 19  | 17  | 3   | 5  | 4  | 7   | 3   | 1  | 8  | 4   | 1.0090291<br>06 | 0%<br>(0.56) |
| FAD1_HUMAN        | 1433B_HUMAN  | YWHAB     | P31946 | 14-3-3 protein beta/alpha (Protein 1054) (Protein kinase C inhibitor protein 1) (KCIP-1) [Cleaved into: 14-3-3 protein beta/alpha, N-terminally processed]                                             | 28 kDa  | 0.17  | 55  | 29  | 26  | 5   | 8  | 7  | 9   | 8   | 0  | 6  | 8   | 1.0085731<br>62 | 0%<br>(0.54) |
| B3KQ33_HUMAN (+1) | Q8TBK5_HUMAN | RPL6      | Q8TBK5 | 60S ribosomal protein L6                                                                                                                                                                               | 33 kDa  | 0.088 | 127 | 68  | 61  | 15  | 17 | 15 | 21  | 16  | 16 | 15 | 14  | 1.0064377<br>04 | 0%<br>(0.51) |
| GSTM3_HUMAN       | P4HA2_HUMAN  | P4HA2     | O15460 | Prolyl 4-hydroxylase subunit alpha-2 (4-PH alpha-2) (EC 1.14.11.2) (Procollagen-proline,2-oxoglutarate-4-dioxygenase subunit alpha-2)                                                                  | 61 kDa  | 0.36  | 53  | 28  | 25  | 1   | 16 | 11 | 0   | 8   | 1  | 6  | 10  | 1.0047755<br>29 | 0%<br>(0.55) |
| SAP18_HUMAN       | P4K2A_HUMAN  | PI4K2A    | Q9BTU6 | Phosphatidylinositol 4-kinase type 2-alpha (EC 2.7.1.67) (Phosphatidylinositol 4-kinase type II-alpha)                                                                                                 | 54 kDa  | 0.2   | 89  | 47  | 42  | 26  | 10 | 9  | 4   | 1   | 10 | 11 | 20  | 1.0035859<br>95 | 0%<br>(0.53) |
| AGAL_HUMAN (+2)   | DRS7B_HUMAN  | DHRS7B    | Q6IAN0 | Dehydrogenase/reductase SDR family member 7B (EC 1.1.-.-)                                                                                                                                              | 35 kDa  | 0.096 | 34  | 18  | 16  | 7   | 1  | 3  | 7   | 4   | 3  | 4  | 5   | 1.0032832<br>25 | 0%<br>(0.57) |
| B4DEL5_HUMAN      | ATPG_HUMAN   | ATP5C1    | P36542 | ATP synthase subunit gamma, mitochondrial (F-ATPase gamma subunit)                                                                                                                                     | 33 kDa  | 0.28  | 124 | 66  | 59  | 21  | 10 | 16 | 19  | 13  | 18 | 8  | 19  | 1.0030688<br>57 | 0%<br>(0.52) |
| B4DGM3_HUMAN (+4) | HNRH2_HUMAN  | HNRNPH2   | P55795 | Heterogeneous nuclear ribonucleoprotein H2 (hnRNP H2) (FTP-3) (Heterogeneous nuclear ribonucleoprotein H) (hnRNP H) [Cleaved into: Heterogeneous nuclear ribonucleoprotein H2, N-terminally processed] | 49 kDa  | 0.069 | 122 | 65  | 58  | 14  | 16 | 14 | 21  | 16  | 15 | 17 | 10  | 1.0013082<br>36 | 0%<br>(0.53) |
| TOR1B_HUMAN       | H2B1D_HUMAN  | HIST1H2BD | P58876 | Histone H2B type 1-D (HIRA-interacting protein 2) (Histone H2B.1 B) (Histone H2B.b) (H2B.b)                                                                                                            | 14 kDa  | 0.26  | 855 | 453 | 405 | 112 | 96 | 96 | 150 | 130 | 93 | 64 | 121 | 1.0013054<br>49 | 0%<br>(0.48) |

|                   |              |          |        |                                                                                                                                                                                                                                                                                                                                                                                                                                                          |        |       |     |     |     |    |    |    |    |    |    |    |    |             |             |           |
|-------------------|--------------|----------|--------|----------------------------------------------------------------------------------------------------------------------------------------------------------------------------------------------------------------------------------------------------------------------------------------------------------------------------------------------------------------------------------------------------------------------------------------------------------|--------|-------|-----|-----|-----|----|----|----|----|----|----|----|----|-------------|-------------|-----------|
| C9JRZ6_HUMAN      | VDAC1_HUMAN  | VDAC1    | P21796 | Voltage-dependent anion-selective channel protein 1 (VDAC-1) (hVDAC1) (Outer mitochondrial membrane protein porin 1) (Plasmalemmal porin) (Porin 31HL) (Porin 31HM)                                                                                                                                                                                                                                                                                      | 31 kDa | 0.19  | 248 | 131 | 117 | 40 | 26 | 30 | 35 | 23 | 34 | 27 | 34 | 1.001085341 | 0% (0.51)   |           |
| B2L13_HUMAN       | G3V0E8_HUMAN | PCBP2    | G3V0E8 | Poly(RC) binding protein 2, isoform CRA_f (Poly(rC)-binding protein 2)                                                                                                                                                                                                                                                                                                                                                                                   | 33 kDa | 0.21  | 51  | 27  | 24  | 3  | 7  | 7  | 10 | 9  | 8  | 6  | 2  | 1.000709159 | 0% (0.56)   |           |
| RAB25_HUMAN       | PLAK_HUMAN   | JUP      | P14923 | Junction plakoglobin (Catenin gamma) (Desmoplakin III) (Desmoplakin-3)                                                                                                                                                                                                                                                                                                                                                                                   | 82 kDa | 0.22  | 142 | 74  | 66  | 22 | 18 | 17 | 17 | 20 | 7  | 17 | 22 | 1.000577793 | 0% (0.53)   |           |
| A8KAH7_HUMAN (+2) | MCCB_HUMAN   | MCCC2    | Q9HCC0 | Methylcrotonoyl-CoA carboxylase beta chain, mitochondrial (MCCase subunit beta) (EC 6.4.1.4) (3-methylcrotonoyl-CoA carboxylase 2) (3-methylcrotonoyl-CoA carboxylase non-biotin-containing subunit) (3-methylcrotonoyl-CoA:carbon dioxide ligase subunit beta)                                                                                                                                                                                          | 61 kDa | 0.15  | 105 | 55  | 49  | 21 | 8  | 7  | 19 | 11 | 12 | 10 | 17 | 1.000180605 | 0% (0.53)   |           |
| B4E2S3_HUMAN      | A8K7T4_HUMAN |          | A8K7T4 | cDNA FLJ75774, highly similar to Homo sapiens lectin, mannose-binding 2 (LMAN2), mRNA                                                                                                                                                                                                                                                                                                                                                                    | 40 kDa | 0.057 | 68  | 36  | 32  | 14 | 10 | 3  | 9  | 4  | 13 | 7  | 8  | -           | 1.000621716 | 0% (0.55) |
| CPSF6_HUMAN (+1)  | SF01_HUMAN   | SF1      | Q15637 | Splicing factor 1 (Mammalian branch point-binding protein) (BBP) (mBBP) (Transcription factor ZFM1) (Zinc finger gene in MEN1 locus) (Zinc finger protein 162)                                                                                                                                                                                                                                                                                           | 68 kDa | 0.11  | 15  | 8   | 7   | 2  | 2  | 2  | 2  | 0  | 0  | 2  | 5  | -           | 1.001435599 | 0% (0.59) |
| D3DTC2_HUMAN (+1) | PPP1R7_HUMAN | PPP1R7   | Q15435 | Protein phosphatase 1 regulatory subunit 7 (Protein phosphatase 1 regulatory subunit 22)                                                                                                                                                                                                                                                                                                                                                                 | 42 kDa | 0.14  | 15  | 8   | 7   | 0  | 2  | 3  | 3  | 2  | 1  | 1  | 3  | -           | 1.001435599 | 0% (0.59) |
| M0QXB4_HUMAN      | CKLF6_HUMAN  | CMTM6    | Q9NX76 | CKLF-like MARVEL transmembrane domain-containing protein 6 (Chemokine-like factor superfamily member 6)                                                                                                                                                                                                                                                                                                                                                  | 20 kDa | 0.19  | 15  | 8   | 7   | 2  | 2  | 3  | 2  | 1  | 2  | 1  | 3  | -           | 1.001435599 | 0% (0.59) |
| H13_HUMAN         | K7EIN2_HUMAN | NUDT16L1 | K7EIN2 | Protein syndesmos (Fragment)                                                                                                                                                                                                                                                                                                                                                                                                                             | 22 kDa | 0.37  | 15  | 8   | 7   | 1  | 0  | 1  | 6  | 1  | 3  | 2  | 0  | -           | 1.001435599 | 0% (0.59) |
| PADI2_HUMAN       | PPP6_HUMAN   | PPP6C    | O00743 | Serine/threonine-protein phosphatase 6 catalytic subunit (PP6C) (EC 3.1.3.16) [Cleaved into: Serine/threonine-protein phosphatase 6 catalytic subunit, N-terminally processed]                                                                                                                                                                                                                                                                           | 35 kDa | 0.11  | 15  | 8   | 7   | 0  | 3  | 3  | 2  | 2  | 4  | 1  | 0  | -           | 1.001435599 | 0% (0.59) |
| B2RNM7_HUMAN (+2) | HCD2_HUMAN   | HSD17B10 | Q99714 | 3-hydroxyacyl-CoA dehydrogenase type-2 (EC 1.1.1.35) (17-beta-hydroxysteroid dehydrogenase 10) (17-beta-HSD 10) (EC 1.1.1.51) (3-hydroxy-2-methylbutyryl-CoA dehydrogenase) (EC 1.1.1.178) (3-hydroxyacyl-CoA dehydrogenase type II) (Endoplasmic reticulum-associated amyloid beta-peptide-binding protein) (Mitochondrial ribonuclease P protein 2) (Mitochondrial RNase P protein 2) (Short-chain type dehydrogenase/reductase XH98G2) (Type II HADH) | 27 kDa | 0.059 | 171 | 91  | 81  | 24 | 23 | 19 | 24 | 23 | 21 | 16 | 20 | -           | 1.00176659  | 0% (0.53) |
| A8K494_HUMAN (+7) | B2R4D8_HUMAN |          | B2R4D8 | 60S ribosomal protein L27                                                                                                                                                                                                                                                                                                                                                                                                                                | 16 kDa | 0.086 | 32  | 17  | 15  | 4  | 5  | 3  | 5  | 4  | 4  | 3  | 4  | -           | 1.003101745 | 0% (0.56) |
| B3KRI2_HUMAN (+1) | A8KAH1_HUMAN |          | A8KAH1 | cDNA FLJ75839, highly similar to Homo sapiens phosphatidylserine synthase 1 (PTDSS1), mRNA                                                                                                                                                                                                                                                                                                                                                               | 55 kDa | 0.11  | 31  | 17  | 15  | 5  | 4  | 4  | 4  | 5  | 2  | 4  | 4  | -           | 1.003101745 | 0% (0.56) |



|                   |              |        |        |                                                                                                                                                                                                                    |         |       |     |     |     |    |     |     |    |    |    |    |    |   |             |           |
|-------------------|--------------|--------|--------|--------------------------------------------------------------------------------------------------------------------------------------------------------------------------------------------------------------------|---------|-------|-----|-----|-----|----|-----|-----|----|----|----|----|----|---|-------------|-----------|
| NDUAB_HUMAN       | A8K435_HUMAN |        | A8K435 | cDNA FLJ78564, highly similar to Homo sapiens aldehyde dehydrogenase 5 family, member A1 (succinate-semialdehyde dehydrogenase) (ALDH5A1), nuclear gene encoding mitochondrial protein, transcript variant 2, mRNA | 57 kDa  | 0.24  | 32  | 17  | 15  | 2  | 6   | 4   | 5  | 7  | 1  | 5  | 2  | - | 1.003101745 | 0% (0.56) |
| B3KM95_HUMAN (+2) | ADPGK_HUMAN  | ADPGK  | Q9BRR6 | ADP-dependent glucokinase (ADP-GK) (ADPGK) (EC 2.7.1.147) (RbBP-35)                                                                                                                                                | 54 kDa  | 0.081 | 50  | 26  | 23  | 6  | 4   | 9   | 7  | 1  | 8  | 4  | 11 | - | 1.003668945 | 0% (0.55) |
| LMF2_HUMAN        | PTBP1_HUMAN  | PTBP1  | P26599 | Polypyrimidine tract-binding protein 1 (PTB) (57 kDa RNA-binding protein PPTB-1) (Heterogeneous nuclear ribonucleoprotein I) (hnRNP I)                                                                             | 57 kDa  | 0.078 | 65  | 35  | 31  | 3  | 8   | 14  | 10 | 8  | 5  | 13 | 4  | - | 1.003955021 | 0% (0.54) |
| GSHR_HUMAN        | BGAL_HUMAN   | GLB1   | P16278 | Beta-galactosidase (EC 3.2.1.23) (Acid beta-galactosidase) (Lactase) (Elastin receptor 1)                                                                                                                          | 76 kDa  | 0.14  | 84  | 44  | 39  | 16 | 11  | 10  | 7  | 7  | 5  | 16 | 12 | - | 1.004127599 | 0% (0.54) |
| DHTK1_HUMAN       | KAD3_HUMAN   | AK3    | Q9UIJ7 | GTP:AMP phosphotransferase AK3, mitochondrial (EC 2.7.4.10) (Adenylate kinase 3) (AK 3) (Adenylate kinase 3 alpha-like 1)                                                                                          | 26 kDa  | 0.047 | 83  | 44  | 39  | 16 | 11  | 10  | 7  | 18 | 5  | 4  | 12 | - | 1.004127599 | 0% (0.54) |
| J3KRX2_HUMAN      | RAB5C_HUMAN  | RAB5C  | P51148 | Ras-related protein Rab-5C (L1880) (RAB5L)                                                                                                                                                                         | 23 kDa  | 0.17  | 100 | 53  | 47  | 17 | 14  | 13  | 9  | 10 | 14 | 9  | 15 | - | 1.004243134 | 0% (0.53) |
| WDR18_HUMAN       | PML_HUMAN    | PML    | P29590 | Protein PML (Promyelocytic leukemia protein) (RING finger protein 71) (Tripartite motif-containing protein 19)                                                                                                     | 98 kDa  | 0.11  | 133 | 71  | 63  | 38 | 5   | 8   | 20 | 10 | 14 | 22 | 17 | - | 1.004388307 | 0% (0.53) |
| ITA6_HUMAN        | CLH1_HUMAN   | CLTC   | Q00610 | Clathrin heavy chain 1 (Clathrin heavy chain on chromosome 17) (CLH-17)                                                                                                                                            | 192 kDa | 0.071 | 707 | 375 | 333 | 68 | 118 | 126 | 65 | 91 | 81 | 78 | 84 | - | 1.005429438 | 0% (0.51) |
| COR1A_HUMAN       | ODPB_HUMAN   | PDHB   | P11177 | Pyruvate dehydrogenase E1 component subunit beta, mitochondrial (PDHE1-B) (EC 1.2.4.1)                                                                                                                             | 39 kDa  | 0.091 | 246 | 131 | 116 | 29 | 34  | 35  | 34 | 44 | 25 | 22 | 25 | - | 1.007449889 | 0% (0.51) |
| B2RSN4_HUMAN (+1) | A8K032_HUMAN |        | A8K032 | cDNA FLJ75031, highly similar to Homo sapiens translocation associated membrane protein 1 (TRAM1), mRNA                                                                                                            | 43 kDa  | 0.17  | 46  | 25  | 22  | 9  | 5   | 5   | 6  | 4  | 5  | 7  | 6  | - | 1.008422997 | 0% (0.54) |
| APOL2_HUMAN       | VIME_HUMAN   | VIM    | P08670 | Vimentin                                                                                                                                                                                                           | 54 kDa  | 0.11  | 387 | 207 | 183 | 46 | 46  | 56  | 60 | 9  | 42 | 86 | 47 | - | 1.009540303 | 0% (0.50) |
| B4DHL7_HUMAN (+6) | RS12_HUMAN   | RPS12  | P25398 | 40S ribosomal protein S12                                                                                                                                                                                          | 15 kDa  | 0.092 | 30  | 16  | 14  | 1  | 5   | 4   | 6  | 7  | 3  | 3  | 1  | - | 1.010311754 | 0% (0.56) |
| A8K6H9_HUMAN (+1) | APOOL_HUMAN  | APOOL  | Q6UXV4 | Apolipoprotein O-like (Protein FAM121A)                                                                                                                                                                            | 29 kDa  | 0.085 | 30  | 16  | 14  | 7  | 1   | 1   | 7  | 5  | 3  | 2  | 4  | - | 1.010311754 | 0% (0.56) |
| S12A7_HUMAN       | J3KQ48_HUMAN | PTRH2  | J3KQ48 | Peptidyl-tRNA hydrolase 2, mitochondrial                                                                                                                                                                           | 19 kDa  | 0.077 | 30  | 16  | 14  | 5  | 4   | 4   | 3  | 5  | 2  | 3  | 4  | - | 1.010311754 | 0% (0.56) |
| LGUL_HUMAN        | ACL6A_HUMAN  | ACTL6A | O96019 | Actin-like protein 6A (53 kDa BRG1-associated factor A) (Actin-related protein Baf53a) (ArpNbeta) (BRG1-associated factor 53A) (BAF53A) (INO80 complex subunit K)                                                  | 47 kDa  | 0.32  | 30  | 16  | 14  | 5  | 4   | 5   | 2  | 5  | 1  | 3  | 5  | - | 1.010311754 | 0% (0.56) |
| M1RL68_HUMAN      | A8K0T9_HUMAN |        | A8K0T9 | cDNA FLJ75422, highly similar to Homo sapiens capping protein (actin filament) muscle Z-line, alpha 1, mRNA                                                                                                        | 33 kDa  | 0.34  | 31  | 16  | 14  | 4  | 4   | 2   | 6  | 5  | 3  | 3  | 3  | - | 1.010311754 | 0% (0.56) |
| QCR7_HUMAN        | FIS1_HUMAN   | FIS1   | Q9Y3D6 | Mitochondrial fission 1 protein (FIS1 homolog) (hFis1) (Tetraatricopeptide repeat protein 11) (TPR repeat protein 11)                                                                                              | 17 kDa  | 0.5   | 30  | 16  | 14  | 5  | 2   | 2   | 7  | 2  | 3  | 4  | 5  | - | 1.010311754 | 0% (0.56) |
| ZN326_HUMAN       | B3KVX6_HUMAN |        | B3KVX6 | cDNA FLJ41699 fis, clone HCHON2004776, highly similar to Homo sapiens cytoskeleton-associated protein 4 (CKAP4), mRNA                                                                                              | 58 kDa  | 0.05  | 236 | 126 | 111 | 41 | 40  | 25  | 23 | 5  | 27 | 35 | 44 | - | 1.012547504 | 0% (0.50) |

|                   |              |          |        |                                                                                                                                                                                                                                                                                   |         |        |     |     |     |    |    |    |    |    |    |    |    |   |             |           |
|-------------------|--------------|----------|--------|-----------------------------------------------------------------------------------------------------------------------------------------------------------------------------------------------------------------------------------------------------------------------------------|---------|--------|-----|-----|-----|----|----|----|----|----|----|----|----|---|-------------|-----------|
| F5H315_HUMAN (+3) | ADT2_HUMAN   | SLC25A5  | P05141 | ADP/ATP translocase 2 (ADP,ATP carrier protein 2) (ADP,ATP carrier protein, fibroblast isoform) (Adenine nucleotide translocator 2) (ANT 2) (Solute carrier family 25 member 5) [Cleaved into: ADP/ATP translocase 2, N-terminally processed]                                     | 33 kDa  | 0.1    | 427 | 227 | 200 | 57 | 54 | 45 | 75 | 48 | 65 | 44 | 46 | - | 1.013039683 | 0% (0.48) |
| F8W7U8_HUMAN (+1) | A8K590_HUMAN |          | A8K590 | cDNA FLJ77456, highly similar to Homo sapiens interleukin enhancer binding factor 3, 90kDa (ILF3), transcript variant 2, mRNA                                                                                                                                                     | 76 kDa  | 0.059  | 188 | 100 | 88  | 12 | 33 | 29 | 26 | 25 | 4  | 40 | 18 | - | 1.013279785 | 0% (0.50) |
| E7D7X9_HUMAN (+2) | CISD2_HUMAN  | CISD2    | Q8N5K1 | CDGSH iron-sulfur domain-containing protein 2 (Endoplasmic reticulum intermembrane small protein) (MitONET-related 1 protein) (Miner1) (Nutrient-deprivation autophagy factor-1) (NAF-1)                                                                                          | 15 kDa  | 0.18   | 45  | 24  | 21  | 6  | 4  | 6  | 8  | 1  | 4  | 7  | 9  | - | 1.013604256 | 0% (0.54) |
| APEX1_HUMAN       | OFUT1_HUMAN  | POFUT1   | Q9H488 | GDP-fucose protein O-fucosyltransferase 1 (EC 2.4.1.221) (Peptide-O-fucosyltransferase 1) (O-FucT-1)                                                                                                                                                                              | 44 kDa  | 0.36   | 45  | 24  | 21  | 6  | 9  | 4  | 5  | 2  | 7  | 7  | 5  | - | 1.013604256 | 0% (0.54) |
| GOGA4_HUMAN (+1)  | PABP1_HUMAN  | PABPC1   | P11940 | Polyadenylate-binding protein 1 (PABP-1) (Poly(A)-binding protein 1)                                                                                                                                                                                                              | 71 kDa  | 0.0094 | 219 | 116 | 102 | 17 | 39 | 36 | 25 | 31 | 25 | 24 | 23 | - | 1.014301769 | 0% (0.49) |
| SEIL3_HUMAN       | COPA_HUMAN   | COPA     | P53621 | Coatomer subunit alpha (Alpha-coat protein) (Alpha-COP) (HEP-COP) (HEPCOP) [Cleaved into: Xenin (Xenopsin-related peptide); Proxenin]                                                                                                                                             | 138 kDa | 0.052  | 185 | 99  | 87  | 24 | 29 | 29 | 19 | 26 | 22 | 16 | 23 | - | 1.014642166 | 0% (0.50) |
| UN45A_HUMAN       | ITA6_HUMAN   | ITGA6    | P23229 | Integrin alpha-6 (CD49 antigen-like family member F) (VLA-6) (CD antigen CD49) [Cleaved into: Integrin alpha-6 heavy chain; Integrin alpha-6 light chain]                                                                                                                         | 127 kDa | 0.11   | 13  | 7   | 6   | 4  | 1  | 2  | 0  | 1  | 0  | 3  | 2  | - | 1.016370031 | 0% (0.59) |
| BCAT1_HUMAN       | B4DTY9_HUMAN | ITGB3    | B4DTY9 | Integrin beta                                                                                                                                                                                                                                                                     | 84 kDa  | 0.11   | 12  | 7   | 6   | 6  | 1  | 0  | 0  | 3  | 0  | 2  | 1  | - | 1.016370031 | 0% (0.59) |
| AP1M2_HUMAN (+2)  | PWP2_HUMAN   | PWP2     | Q15269 | Periodic tryptophan protein 2 homolog                                                                                                                                                                                                                                             | 102 kDa | 0.13   | 13  | 7   | 6   | 1  | 1  | 1  | 4  | 2  | 0  | 3  | 1  | - | 1.016370031 | 0% (0.59) |
| B7Z7P8_HUMAN (+2) | A8K885_HUMAN |          | A8K885 | cDNA FLJ77179, highly similar to Homo sapiens sorting nexin 6 (SNX6) mRNA                                                                                                                                                                                                         | 47 kDa  | 0.16   | 13  | 7   | 6   | 0  | 2  | 0  | 5  | 1  | 3  | 1  | 1  | - | 1.016370031 | 0% (0.59) |
| PRAF1_HUMAN       | ANAG_HUMAN   | NAGLU    | P54802 | Alpha-N-acetylglucosaminidase (EC 3.2.1.50) (N-acetyl-alpha-glucosaminidase) (NAG) [Cleaved into: Alpha-N-acetylglucosaminidase 82 kDa form; Alpha-N-acetylglucosaminidase 77 kDa form]                                                                                           | 82 kDa  | 0.16   | 13  | 7   | 6   | 2  | 1  | 4  | 0  | 1  | 0  | 2  | 3  | - | 1.016370031 | 0% (0.59) |
| ACSF3_HUMAN       | PA1B3_HUMAN  | PAFAH1B3 | Q15102 | Platelet-activating factor acetylhydrolase IB subunit gamma (EC 3.1.1.47) (PAF acetylhydrolase 29 kDa subunit) (PAF-AH 29 kDa subunit) (PAF-AH subunit gamma) (PAFAH subunit gamma)                                                                                               | 26 kDa  | 0.1    | 13  | 7   | 6   | 0  | 1  | 3  | 3  | 0  | 3  | 2  | 1  | - | 1.016370031 | 0% (0.59) |
| IF2A_HUMAN        | LTOR2_HUMAN  | LAMTOR2  | Q9Y2Q5 | Ragulator complex protein LAMTOR2 (Endosomal adaptor protein p14) (Late endosomal/lysosomal Mp1-interacting protein) (Late endosomal/lysosomal adaptor and MAPK and MTOR activator 2) (Mitogen-activated protein-binding protein-interacting protein) (MAPBP-interacting protein) | 14 kDa  | 0.37   | 13  | 7   | 6   | 0  | 4  | 1  | 2  | 1  | 1  | 2  | 2  | - | 1.016370031 | 0% (0.59) |

|                   |              |          |        |                                                                                                                                                                                                                                                                                                                  |         |        |     |     |     |    |    |    |    |    |    |    |    |   |             |           |
|-------------------|--------------|----------|--------|------------------------------------------------------------------------------------------------------------------------------------------------------------------------------------------------------------------------------------------------------------------------------------------------------------------|---------|--------|-----|-----|-----|----|----|----|----|----|----|----|----|---|-------------|-----------|
|                   |              |          |        | (Roadblock domain-containing protein 3)                                                                                                                                                                                                                                                                          |         |        |     |     |     |    |    |    |    |    |    |    |    |   |             |           |
| RFC4_HUMAN        | AL3B1_HUMAN  | ALDH3B1  | P43353 | Aldehyde dehydrogenase family 3 member B1 (EC 1.2.1.5) (Aldehyde dehydrogenase 7)                                                                                                                                                                                                                                | 52 kDa  | 0.11   | 13  | 7   | 6   | 2  | 0  | 0  | 3  | 0  | 0  | 2  | 0  | - | 1.016370031 | 0% (0.59) |
| DPP3_HUMAN (+3)   | YME1L1_HUMAN | YME1L1   | Q96TA2 | ATP-dependent zinc metalloprotease YME1L1 (EC 3.4.24.-) (ATP-dependent metalloprotease FtsH1) (Meg-4) (Presenilin-associated metalloprotease) (PAMP) (YME1-like protein 1)                                                                                                                                       | 86 kDa  | 0.09   | 28  | 15  | 13  | 5  | 5  | 3  | 2  | 7  | 0  | 3  | 3  | - | 1.018533501 | 0% (0.55) |
| LAMA5_HUMAN       | CQ062_HUMAN  | C17orf62 | Q9BQA9 | Uncharacterized protein C17orf62                                                                                                                                                                                                                                                                                 | 21 kDa  | 0.0076 | 28  | 15  | 13  | 4  | 3  | 2  | 6  | 0  | 7  | 2  | 4  | - | 1.018533501 | 0% (0.55) |
| SPT6H_HUMAN       | PPT1_HUMAN   | PPT1     | P50897 | Palmitoyl-protein thioesterase 1 (PPT-1) (EC 3.1.2.22) (Palmitoyl-protein hydrolase 1)                                                                                                                                                                                                                           | 34 kDa  | 0.052  | 27  | 15  | 13  | 2  | 6  | 4  | 3  | 2  | 1  | 4  | 6  | - | 1.018533501 | 0% (0.55) |
| EMC4_HUMAN (+1)   | RMD1_HUMAN   | RMDN1    | Q96DB5 | Regulator of microtubule dynamics protein 1 (RMD-1) (hRMD-1) (Protein FAM82B)                                                                                                                                                                                                                                    | 36 kDa  | 0.21   | 28  | 15  | 13  | 6  | 3  | 2  | 4  | 5  | 0  | 6  | 2  | - | 1.018533501 | 0% (0.55) |
| Q05BS6_HUMAN (+2) | NU188_HUMAN  | NUP188   | Q5SRE5 | Nucleoporin NUP188 homolog (hNup188)                                                                                                                                                                                                                                                                             | 196 kDa | 0.057  | 28  | 15  | 13  | 2  | 2  | 6  | 5  | 1  | 1  | 10 | 1  | - | 1.018533501 | 0% (0.55) |
| ERH_HUMAN         | A8K309_HUMAN |          | A8K309 | cDNA FLJ76654, highly similar to Homo sapiens CD44 antigen (cloning function and Indian blood group system) (CD44), transcript variant 4, mRNA                                                                                                                                                                   | 39 kDa  | 0.32   | 28  | 15  | 13  | 2  | 5  | 6  | 2  | 0  | 3  | 7  | 3  | - | 1.018533501 | 0% (0.55) |
| SIN3A_HUMAN       | ALG1_HUMAN   | ALG1     | Q9BT22 | Chitobiosyldiphosphodolichol beta-mannosyltransferase (EC 2.4.1.142) (Asparagine-linked glycosylation protein 1 homolog) (Beta-1,4-mannosyltransferase) (GDP-Man:GlcNAc2-PP-dolichol mannosyltransferase) (GDP-mannose-dolichol diphosphochitobiose mannosyltransferase) (Mannosyltransferase-1) (MT-1) (hMat-1) | 53 kDa  | 0.06   | 43  | 23  | 20  | 9  | 5  | 3  | 6  | 2  | 4  | 5  | 9  | - | 1.019273033 | 0% (0.53) |
| J3QX2_HUMAN       | OXLA_HUMAN   | IL4I1    | Q96RQ9 | L-amino-acid oxidase (LAAO) (LAO) (EC 1.4.3.2) (Interleukin-4-induced protein 1) (IL4-induced protein 1) (Protein Fig-1) (hFIG1)                                                                                                                                                                                 | 63 kDa  | 0.19   | 73  | 39  | 34  | 13 | 3  | 6  | 17 | 0  | 14 | 7  | 14 | - | 1.019873499 | 0% (0.51) |
| A8K813_HUMAN (+2) | J3KN69_HUMAN | NCEH1    | J3KN69 | Arylacetamide deacetylase-like 1 (Neutral cholesterol ester hydrolase 1)                                                                                                                                                                                                                                         | 49 kDa  | 0.1    | 133 | 71  | 62  | 25 | 17 | 21 | 9  | 3  | 12 | 14 | 33 | - | 1.020282654 | 0% (0.49) |
| A8K1D2_HUMAN (+1) | B3KQT9_HUMAN |          | B3KQT9 | cDNA PSEC0175 fis, clone OVARC1000169, highly similar to Protein disulfide-isomerase A3 (EC 5.3.4.1)                                                                                                                                                                                                             | 54 kDa  | 0.16   | 527 | 284 | 248 | 65 | 80 | 74 | 65 | 35 | 53 | 75 | 84 | - | 1.022257507 | 0% (0.43) |
| B4DEK4_HUMAN (+1) | A8K8U1_HUMAN |          | A8K8U1 | cDNA FLJ77762, highly similar to Homo sapiens cullin-associated and neddylation-dissociated 1 (CAND1), mRNA                                                                                                                                                                                                      | 136 kDa | 0.18   | 86  | 46  | 40  | 7  | 11 | 13 | 16 | 11 | 10 | 13 | 6  | - | 1.02310211  | 0% (0.50) |
| HSDL1_HUMAN (+1)  | MOES_HUMAN   | MSN      | P26038 | Moesin (Membrane-organizing extension spike protein)                                                                                                                                                                                                                                                             | 68 kDa  | 0.14   | 172 | 93  | 81  | 16 | 33 | 26 | 19 | 15 | 21 | 23 | 22 | - | 1.023511437 | 0% (0.48) |
| NOP9_HUMAN        | ACSS3_HUMAN  | ACSS3    | Q9H6R3 | Acyl-CoA synthetase short-chain family member 3, mitochondrial (EC 6.2.1.1) (Acyl-CoA synthetase short-chain family member 3)                                                                                                                                                                                    | 75 kDa  | 0.072  | 56  | 30  | 26  | 16 | 2  | 2  | 10 | 7  | 0  | 9  | 10 | - | 1.024289728 | 0% (0.52) |
| TRNT1_HUMAN       | A4QPBO_HUMAN | IQGAP1   | A4QPBO | IQ motif containing GTPase activating protein 1                                                                                                                                                                                                                                                                  | 189 kDa | 0.1    | 329 | 177 | 154 | 41 | 39 | 44 | 52 | 23 | 36 | 56 | 40 | - | 1.025552454 | 0% (0.44) |
| RETST_HUMAN       | Q9BTQ7_HUMAN |          | Q9BTQ7 | Similar to ribosomal protein L23 (Fragment)                                                                                                                                                                                                                                                                      | 14 kDa  | 0.11   | 83  | 45  | 39  | 11 | 16 | 7  | 11 | 12 | 9  | 8  | 10 | - | 1.026331458 | 0% (0.50) |
| F8W914_HUMAN (+1) | PTN1_HUMAN   | PTPN1    | P18031 | Tyrosine-protein phosphatase non-receptor type 1 (EC                                                                                                                                                                                                                                                             | 50 kDa  | 0.27   | 69  | 37  | 32  | 6  | 11 | 15 | 5  | 5  | 8  | 11 | 8  | - | 1.027497251 | 0% (0.50) |

|                   |              |         |        |                                                                                                                                                                                                          |        |       |     |     |     |    |    |    |    |    |    |    |    |   |             |           |
|-------------------|--------------|---------|--------|----------------------------------------------------------------------------------------------------------------------------------------------------------------------------------------------------------|--------|-------|-----|-----|-----|----|----|----|----|----|----|----|----|---|-------------|-----------|
|                   |              |         |        | 3.1.3.48) (Protein-tyrosine phosphatase 1B) (PTP-1B)                                                                                                                                                     |        |       |     |     |     |    |    |    |    |    |    |    |    |   |             |           |
| RU2B_HUMAN        | PSDE_HUMAN   | PSMD14  | O00487 | 26S proteasome non-ATPase regulatory subunit 14 (EC 3.4.19.-) (26S proteasome regulatory subunit RPN11) (26S proteasome-associated PADI homolog 1)                                                       | 35 kDa | 0.12  | 26  | 14  | 12  | 1  | 5  | 2  | 6  | 4  | 5  | 2  | 1  | - | 1.02799606  | 0% (0.54) |
| JAGN1_HUMAN       | AGR2_HUMAN   | AGR2    | O95994 | Anterior gradient protein 2 homolog (AG-2) (hAG-2) (HPC8) (Secreted cement gland protein XAG-2 homolog)                                                                                                  | 20 kDa | 0.14  | 26  | 14  | 12  | 10 | 1  | 0  | 4  | 1  | 3  | 6  | 2  | - | 1.02799606  | 0% (0.54) |
| Q53HP9_HUMAN      | PSB1_HUMAN   | PSMB1   | P20618 | Proteasome subunit beta type-1 (EC 3.4.25.1) (Macropain subunit C5) (Multicatalytic endopeptidase complex subunit C5) (Proteasome component C5) (Proteasome gamma chain)                                 | 26 kDa | 0.12  | 26  | 14  | 12  | 3  | 4  | 3  | 4  | 3  | 2  | 5  | 2  | - | 1.02799606  | 0% (0.54) |
| B4DTY9_HUMAN (+3) | RDH14_HUMAN  | RDH14   | Q9HBH5 | Retinol dehydrogenase 14 (EC 1.1.1.-) (Alcohol dehydrogenase PAN2)                                                                                                                                       | 37 kDa | 0.071 | 26  | 14  | 12  | 6  | 2  | 1  | 5  | 4  | 1  | 3  | 4  | - | 1.02799606  | 0% (0.54) |
| B3KX23_HUMAN (+1) | G6PE_HUMAN   | H6PD    | O95479 | GDH6PGL endoplasmic bifunctional protein [Includes: Glucose 1-dehydrogenase (EC 1.1.1.47) (Hexose-6-phosphate dehydrogenase); 6-phosphogluconolactonase (6PGL) (EC 3.1.1.31)]                            | 89 kDa | 0.095 | 54  | 29  | 25  | 7  | 5  | 7  | 10 | 7  | 3  | 6  | 10 | - | 1.029285942 | 0% (0.51) |
| F8VXY3_HUMAN (+2) | RS14_HUMAN   | RPS14   | P62263 | 40S ribosomal protein S14                                                                                                                                                                                | 16 kDa | 0.19  | 53  | 29  | 25  | 4  | 5  | 11 | 9  | 10 | 9  | 3  | 3  | - | 1.029285942 | 0% (0.51) |
| U2AF1_HUMAN       | ARM10_HUMAN  | ARMC10  | Q8N2F6 | Armadillo repeat-containing protein 10 (Splicing variant involved in hepatocarcinogenesis protein)                                                                                                       | 38 kDa | 0.12  | 82  | 44  | 38  | 10 | 13 | 12 | 9  | 11 | 5  | 12 | 10 | - | 1.029725288 | 0% (0.49) |
| SURF1_HUMAN       | B4DF70_HUMAN |         | B4DF70 | cDNA FLJ60461, highly similar to Peroxiredoxin-2 (EC 1.11.1.15)                                                                                                                                          | 20 kDa | 0.13  | 82  | 44  | 38  | 8  | 12 | 12 | 12 | 7  | 9  | 10 | 12 | - | 1.029725288 | 0% (0.49) |
| A8K6F0_HUMAN (+1) | B4E2W0_HUMAN | HADHB   | B4E2W0 | 3-ketoacyl-CoA thiolase (cDNA FLJ56214, highly similar to Trifunctional enzyme subunit beta, mitochondrial)                                                                                              | 49 kDa | 0.036 | 235 | 126 | 109 | 36 | 29 | 24 | 37 | 35 | 15 | 25 | 36 | - | 1.030945418 | 0% (0.44) |
| Q5SYZ4_HUMAN (+1) | AMPL_HUMAN   | LAP3    | P28838 | Cytosol aminopeptidase (EC 3.4.11.1) (Leucine aminopeptidase 3) (LAP-3) (Leucyl aminopeptidase) (Peptidase S) (Proline aminopeptidase) (EC 3.4.11.5) (Prolyl aminopeptidase)                             | 56 kDa | 0.23  | 207 | 111 | 96  | 15 | 24 | 23 | 50 | 23 | 27 | 28 | 17 | - | 1.030981158 | 0% (0.45) |
| B2R5I8_HUMAN (+1) | ALDOA_HUMAN  | ALDOA   | P04075 | Fructose-bisphosphate aldolase A (EC 4.1.2.13) (Lung cancer antigen NY-LU-1) (Muscle-type aldolase)                                                                                                      | 39 kDa | 0.22  | 122 | 66  | 57  | 8  | 16 | 17 | 29 | 14 | 9  | 20 | 15 | - | 1.031199941 | 0% (0.47) |
| H0YN88_HUMAN      | AL3A2_HUMAN  | ALDH3A2 | P51648 | Fatty aldehyde dehydrogenase (EC 1.2.1.3) (Aldehyde dehydrogenase 10) (Aldehyde dehydrogenase family 3 member A2) (Microsomal aldehyde dehydrogenase)                                                    | 55 kDa | 0.16  | 95  | 51  | 44  | 21 | 7  | 7  | 17 | 12 | 8  | 7  | 17 | - | 1.031363468 | 0% (0.48) |
| TBB2B_HUMAN       | 2AAA_HUMAN   | PPP2R1A | P30153 | Serine/threonine-protein phosphatase 2A 65 kDa regulatory subunit A alpha isoform (Medium tumor antigen-associated 61 kDa protein) (PP2A subunit A isoform PR65-alpha) (PP2A subunit A isoform R1-alpha) | 65 kDa | 0.46  | 67  | 36  | 31  | 6  | 12 | 9  | 8  | 8  | 11 | 10 | 2  | - | 1.031663593 | 0% (0.50) |
| VWA8_HUMAN        | Q9BQQ5_HUMAN | L27a    | Q9BQQ5 | Ribosomal protein L27a                                                                                                                                                                                   | 12 kDa | 0.053 | 39  | 21  | 18  | 5  | 5  | 6  | 5  | 6  | 6  | 4  | 3  | - | 1.032377052 | 0% (0.52) |
| E7EVP7_HUMAN (+1) | CN37_HUMAN   | CNP     | P09543 | 2',3'-cyclic-nucleotide 3'-phosphodiesterase (CNP) (CNPase) (EC 3.1.4.37)                                                                                                                                | 48 kDa | 0.045 | 11  | 6   | 5   | 2  | 0  | 0  | 5  | 0  | 4  | 1  | 0  | - | 1.036083042 | 0% (0.58) |
| ABCBA_HUMAN       | PPOX_HUMAN   | PPOX    | P50336 | Protoporphyrinogen oxidase (PPO) (EC 1.3.3.4)                                                                                                                                                            | 51 kDa | 0.057 | 11  | 6   | 5   | 0  | 1  | 2  | 3  | 3  | 0  | 1  | 1  | - | 1.036083042 | 0% (0.58) |

|                      |              |        |        |                                                                                                                                                                                                                                                                                                                                                  |         |       |    |    |    |   |   |    |    |   |    |   |    |                      |              |
|----------------------|--------------|--------|--------|--------------------------------------------------------------------------------------------------------------------------------------------------------------------------------------------------------------------------------------------------------------------------------------------------------------------------------------------------|---------|-------|----|----|----|---|---|----|----|---|----|---|----|----------------------|--------------|
| AAPK1_HUMAN          | A8K6G9_HUMAN |        | A8K6G9 | cDNA FLJ76871, highly similar to Homo sapiens DEAH (Asp-Glu-Ala-His) box polypeptide 38 (DHX38), mRNA                                                                                                                                                                                                                                            | 140 kDa | 0.12  | 12 | 6  | 5  | 0 | 3 | 2  | 1  | 2 | 1  | 2 | 0  | -<br>1.0360830<br>42 | 0%<br>(0.58) |
| E7ER89_HUMAN (+1)    | TLR2_HUMAN   | TLR2   | O60603 | Toll-like receptor 2 (Toll/interleukin-1 receptor-like protein 4) (CD antigen CD282)                                                                                                                                                                                                                                                             | 90 kDa  | 0.14  | 11 | 6  | 5  | 1 | 4 | 1  | 0  | 0 | 1  | 3 | 1  | -<br>1.0360830<br>42 | 0%<br>(0.58) |
| HPT_HUMAN (+2)       | A8K588_HUMAN |        | A8K588 | cDNA FLJ76823, highly similar to Homo sapiens splicing factor, arginine/serine-rich 6 (SFRS6), mRNA                                                                                                                                                                                                                                              | 39 kDa  | 0.29  | 11 | 6  | 5  | 0 | 1 | 4  | 1  | 1 | 2  | 1 | 1  | -<br>1.0360830<br>42 | 0%<br>(0.58) |
| B3KP52_HUMAN (+2)    | FND3B_HUMAN  | FNDC3B | Q53EP0 | Fibronectin type III domain-containing protein 3B (Factor for adipocyte differentiation 104) (HCV NS5A-binding protein 37)                                                                                                                                                                                                                       | 133 kDa | 0.098 | 11 | 6  | 5  | 2 | 2 | 2  | 0  | 0 | 0  | 3 | 2  | -<br>1.0360830<br>42 | 0%<br>(0.58) |
| K7ELC4_HUMAN N (+4)  | NU214_HUMAN  | NUP214 | P35658 | Nuclear pore complex protein Nup214 (214 kDa nucleoporin) (Nucleoporin Nup214) (Protein CAN)                                                                                                                                                                                                                                                     | 214 kDa | 0.32  | 11 | 6  | 5  | 0 | 3 | 3  | 0  | 1 | 0  | 3 | 1  | -<br>1.0360830<br>42 | 0%<br>(0.58) |
| TFB2M_HUMAN          | SNX3_HUMAN   | SNX3   | O60493 | Sorting nexin-3 (Protein SDP3)                                                                                                                                                                                                                                                                                                                   | 19 kDa  | 0.096 | 10 | 6  | 5  | 2 | 2 | 1  | 1  | 0 | 1  | 2 | 2  | -<br>1.0360830<br>42 | 0%<br>(0.58) |
| F8VUJ3_HUMAN         | B4DXV9_HUMAN |        | B4DXV9 | cDNA FLJ53678                                                                                                                                                                                                                                                                                                                                    | 46 kDa  | 0.047 | 11 | 6  | 5  | 2 | 2 | 2  | 0  | 4 | 0  | 0 | 1  | -<br>1.0360830<br>42 | 0%<br>(0.58) |
| PM14_HUMAN           | B2R5U7_HUMAN |        | B2R5U7 | cDNA FLJ92633, highly similar to Homo sapiens CCAAT-box-binding transcription factor (CBF2), mRNA                                                                                                                                                                                                                                                | 114 kDa | 0.3   | 11 | 6  | 5  | 0 | 2 | 3  | 1  | 5 | 0  | 0 | 0  | -<br>1.0360830<br>42 | 0%<br>(0.58) |
| IF2P_HUMAN (+1)      | Q59G24_HUMAN |        | Q59G24 | Activated RNA polymerase II transcription cofactor 4 variant (Fragment)                                                                                                                                                                                                                                                                          | 15 kDa  | 0.059 | 11 | 6  | 5  | 2 | 1 | 0  | 3  | 2 | 0  | 2 | 1  | -<br>1.0360830<br>42 | 0%<br>(0.58) |
| B4DMR0_HUMAN AN (+3) | PXMP2_HUMAN  | PXMP2  | Q9NR77 | Peroxisomal membrane protein 2 (22 kDa peroxisomal membrane protein)                                                                                                                                                                                                                                                                             | 22 kDa  | 0.16  | 11 | 6  | 5  | 1 | 1 | 2  | 2  | 1 | 2  | 1 | 1  | -<br>1.0360830<br>42 | 0%<br>(0.58) |
| S27A3_HUMAN          | B3KNQ2_HUMAN |        | B3KNQ2 | cDNA FLJ50150 fis, clone BRACE2000300, highly similar to Transmembrane protein TPARG                                                                                                                                                                                                                                                             | 16 kDa  | 0.047 | 11 | 6  | 5  | 2 | 2 | 1  | 1  | 1 | 0  | 3 | 1  | -<br>1.0360830<br>42 | 0%<br>(0.58) |
| AMPB_HUMAN (+1)      | A8K7A4_HUMAN |        | A8K7A4 | cDNA FLJ76904, highly similar to Homo sapiens methionine adenosyltransferase II, beta (MAT2B), transcript variant 2, mRNA                                                                                                                                                                                                                        | 36 kDa  | 0.11  | 11 | 6  | 5  | 1 | 0 | 3  | 2  | 2 | 0  | 2 | 1  | -<br>1.0360830<br>42 | 0%<br>(0.58) |
| PCAT2_HUMAN          | CELF1_HUMAN  | CELF1  | Q92879 | CUGBP Elav-like family member 1 (CELF-1) (50 kDa nuclear polyadenylated RNA-binding protein) (Bruno-like protein 2) (CUG triplet repeat RNA-binding protein 1) (CUG-BP1) (CUG-BP- and ETR-3-like factor 1) (Deadenylation factor CUG-BP) (Embryo deadenylation element-binding protein homolog) (EDEN-BP homolog) (RNA-binding protein BRUNOL-2) | 52 kDa  | 0.075 | 11 | 6  | 5  | 0 | 2 | 1  | 3  | 1 | 0  | 4 | 0  | -<br>1.0360830<br>42 | 0%<br>(0.58) |
| GALE_HUMAN           | B4DWC4_HUMAN |        | B4DWC4 | cDNA FLJ61180, highly similar to Chloride intracellular channel protein 4                                                                                                                                                                                                                                                                        | 28 kDa  | 0.2   | 11 | 6  | 5  | 1 | 1 | 2  | 2  | 3 | 1  | 0 | 0  | -<br>1.0360830<br>42 | 0%<br>(0.58) |
| NDUAC_HUMAN (+1)     | RS13_HUMAN   | RPS13  | P62277 | 40S ribosomal protein S13                                                                                                                                                                                                                                                                                                                        | 17 kDa  | 0.17  | 65 | 35 | 30 | 9 | 9 | 7  | 11 | 7 | 13 | 5 | 5  | -<br>1.0360964<br>92 | 0%<br>(0.49) |
| RM49_HUMAN           | HIBCH_HUMAN  | HIBCH  | Q6NVY1 | 3-hydroxyisobutyryl-CoA hydrolase, mitochondrial (EC 3.1.2.4) (3-hydroxyisobutyryl-coenzyme A hydrolase) (HIB-CoA hydrolase) (HIBYL-CoA-H)                                                                                                                                                                                                       | 43 kDa  | 0.23  | 65 | 35 | 30 | 7 | 8 | 10 | 11 | 6 | 5  | 6 | 13 | -<br>1.0360964<br>92 | 0%<br>(0.49) |
| B4DSQ5_HUMAN (+2)    | B3KM81_HUMAN |        | B3KM81 | cDNA FLJ10471 fis, clone NT2RP2000045, highly similar to DnaJ homolog                                                                                                                                                                                                                                                                            | 50 kDa  | 0.12  | 65 | 35 | 30 | 7 | 9 | 7  | 12 | 5 | 11 | 5 | 9  | -<br>1.0360964<br>92 | 0%<br>(0.49) |

|                   |              |         |        |                                                                                                                                                                                                                            |         |       |     |    |    |    |    |    |    |    |    |    |    |   |             |           |
|-------------------|--------------|---------|--------|----------------------------------------------------------------------------------------------------------------------------------------------------------------------------------------------------------------------------|---------|-------|-----|----|----|----|----|----|----|----|----|----|----|---|-------------|-----------|
|                   |              |         |        | subfamily A member 3, mitochondrial                                                                                                                                                                                        |         |       |     |    |    |    |    |    |    |    |    |    |    |   |             |           |
| DEST_HUMAN (+1)   | RB12B_HUMAN  | RBM12B  | Q8IXT5 | RNA-binding protein 12B (RNA-binding motif protein 12B)                                                                                                                                                                    | 118 kDa | 0.19  | 24  | 13 | 11 | 2  | 3  | 3  | 5  | 3  | 0  | 6  | 2  | - | 1.039003302 | 0% (0.53) |
| PEF1_HUMAN        | PUF60_HUMAN  | PUF60   | Q9UHX1 | Poly(U)-binding-splicing factor PUF60 (60 kDa poly(U)-binding-splicing factor) (FUSE-binding protein-interacting repressor) (FBP-interacting repressor) (Ro-binding protein 1) (RoBP1) (Siah-binding protein 1) (Siah-BP1) | 60 kDa  | 0.085 | 25  | 13 | 11 | 0  | 4  | 6  | 3  | 2  | 1  | 7  | 1  | - | 1.039003302 | 0% (0.53) |
| B7Z7N1_HUMAN (+3) | B4DXK8_HUMAN | UTP15   | B4DXK8 | U3 small nucleolar RNA-associated protein 15 homolog (cDNA FLJ57656, highly similar to U3 small nucleolar RNA-associated protein 15 homolog)                                                                               | 56 kDa  | 0.26  | 25  | 13 | 11 | 4  | 2  | 2  | 5  | 7  | 0  | 2  | 2  | - | 1.039003302 | 0% (0.53) |
| B4DEI4_HUMAN (+2) | CATS_HUMAN   | CTSS    | P25774 | Cathepsin S (EC 3.4.22.27)                                                                                                                                                                                                 | 37 kDa  | 0.064 | 24  | 13 | 11 | 0  | 7  | 5  | 0  | 0  | 0  | 3  | 8  | - | 1.039003302 | 0% (0.53) |
| B7Z4S9_HUMAN (+2) | NDUA6_HUMAN  | NDUFA6  | P56556 | NADH dehydrogenase [ubiquinone] 1 alpha subcomplex subunit 6 (Complex I-B14) (LYR motif-containing protein 6) (NADH-ubiquinone oxidoreductase B14 subunit)                                                                 | 18 kDa  | 0.12  | 24  | 13 | 11 | 3  | 4  | 4  | 2  | 5  | 1  | 3  | 2  | - | 1.039003302 | 0% (0.53) |
| A3R0T7_HUMAN (+2) | APOO_HUMAN   | APOO    | Q9BUR5 | Apolipoprotein O (Protein FAM121B)                                                                                                                                                                                         | 22 kDa  | 0.34  | 24  | 13 | 11 | 4  | 3  | 2  | 4  | 3  | 2  | 3  | 3  | - | 1.039003302 | 0% (0.53) |
| B1AKZ3_HUMAN (+2) | B3KM95_HUMAN |         | B3KM95 | Phosphatidate cytidyltransferase (EC 2.7.7.41)                                                                                                                                                                             | 51 kDa  | 0.17  | 24  | 13 | 11 | 5  | 3  | 3  | 2  | 1  | 3  | 3  | 4  | - | 1.039003302 | 0% (0.53) |
| H3BSH7_HUMAN      | B4E175_HUMAN |         | B4E175 | cDNA FLJ54775, highly similar to Syntaxin-binding protein 2                                                                                                                                                                | 68 kDa  | 0.039 | 37  | 20 | 17 | 10 | 2  | 5  | 3  | 2  | 3  | 7  | 5  | - | 1.040005878 | 0% (0.51) |
| PLBL1_HUMAN       | A8K4T6_HUMAN |         | A8K4T6 | cDNA FLJ76282, highly similar to Homo sapiens proteasome (prosome, macropain) 26S subunit, non-ATPase, 5 (PSMD5), mRNA                                                                                                     | 56 kDa  | 0.12  | 37  | 20 | 17 | 1  | 2  | 2  | 14 | 3  | 10 | 3  | 1  | - | 1.040005878 | 0% (0.51) |
| AAKG1_HUMAN       | ERMP1_HUMAN  | ERMP1   | Q7Z2K6 | Endoplasmic reticulum metalloproteinase 1 (EC 3.4.-.-) (Felix-ina)                                                                                                                                                         | 100 kDa | 0.19  | 38  | 20 | 17 | 10 | 5  | 4  | 2  | 5  | 2  | 3  | 7  | - | 1.040005878 | 0% (0.51) |
| RBM25_HUMAN       | K7EPB2_HUMAN | PRKAR1A | K7EPB2 | cAMP-dependent protein kinase type I-alpha regulatory subunit (Fragment)                                                                                                                                                   | 34 kDa  | 0.039 | 37  | 20 | 17 | 5  | 3  | 3  | 9  | 5  | 4  | 7  | 1  | - | 1.040005878 | 0% (0.51) |
| H7C579_HUMAN (+1) | A4D0R2_HUMAN | SYPL    | A4D0R2 | Synaptophysin-like 1, isoform CRA_b (Synaptophysin-like protein)                                                                                                                                                           | 26 kDa  | 0.27  | 52  | 27 | 23 | 5  | 7  | 5  | 10 | 6  | 7  | 6  | 4  | - | 1.040514206 | 0% (0.50) |
| R4RWU8_HUMAN      | AL1B1_HUMAN  | ALDH1B1 | P30837 | Aldehyde dehydrogenase X, mitochondrial (EC 1.2.1.3) (Aldehyde dehydrogenase 5) (Aldehyde dehydrogenase family 1 member B1)                                                                                                | 57 kDa  | 0.42  | 76  | 41 | 35 | 22 | 9  | 5  | 5  | 19 | 3  | 4  | 10 | - | 1.041029799 | 0% (0.48) |
| B4DKQ5_HUMAN (+1) | RS9_HUMAN    | RPS9    | P46781 | 40S ribosomal protein S9                                                                                                                                                                                                   | 23 kDa  | 0.18  | 102 | 55 | 47 | 14 | 14 | 13 | 14 | 13 | 13 | 11 | 9  | - | 1.041292697 | 0% (0.46) |
| AGRIN_HUMAN       | B4DUQ1_HUMAN |         | B4DUQ1 | cDNA FLJ54552, highly similar to Heterogeneous nuclear ribonucleoprotein K                                                                                                                                                 | 49 kDa  | 0.057 | 178 | 96 | 82 | 8  | 27 | 26 | 35 | 20 | 14 | 28 | 20 | - | 1.043429523 | 0% (0.42) |
| D3DWV9_HUMAN (+5) | TPIS_HUMAN   | TP11    | P60174 | Triosephosphate isomerase (TIM) (EC 5.3.1.1) (Triosephosphate isomerase)                                                                                                                                                   | 31 kDa  | 0.1   | 137 | 74 | 63 | 11 | 18 | 13 | 33 | 16 | 29 | 11 | 7  | - | 1.04613337  | 0% (0.43) |
| A8K7S8_HUMAN (+4) | LMAN1_HUMAN  | LMAN1   | P49257 | Protein ERGIC-53 (ER-Golgi intermediate compartment 53 kDa protein) (Gp58) (Intracellular mannose-specific lectin MR60) (Lectin mannose-binding 1)                                                                         | 58 kDa  | 0.11  | 47  | 26 | 22 | 6  | 7  | 9  | 4  | 6  | 5  | 4  | 7  | - | 1.046852565 | 0% (0.49) |
| B7Z954_HUMAN (+1) | B0QY89_HUMAN | EIF3L   | B0QY89 | Eukaryotic translation initiation factor 3 subunit L (eIF3L) (Eukaryotic translation initiation factor 3 subunit 6-interacting protein) (Eukaryotic translation                                                            | 71 kDa  | 0.047 | 48  | 26 | 22 | 2  | 9  | 8  | 8  | 6  | 7  | 6  | 3  | - | 1.046852565 | 0% (0.49) |

|                   |              |          |        |                                                                                                                                                                                                                                                                                                                                             |         |       |     |     |     |    |    |    |    |    |    |    |    |   |             |           |
|-------------------|--------------|----------|--------|---------------------------------------------------------------------------------------------------------------------------------------------------------------------------------------------------------------------------------------------------------------------------------------------------------------------------------------------|---------|-------|-----|-----|-----|----|----|----|----|----|----|----|----|---|-------------|-----------|
|                   |              |          |        | initiation factor 3 subunit E-interacting protein)                                                                                                                                                                                                                                                                                          |         |       |     |     |     |    |    |    |    |    |    |    |    |   |             |           |
| STRN_HUMAN        | Q8WVX7_HUMAN |          | Q8WVX7 | Ribosomal protein S19 (Fragment)                                                                                                                                                                                                                                                                                                            | 17 kDa  | 0.063 | 48  | 26  | 22  | 6  | 6  | 7  | 7  | 8  | 8  | 3  | 3  | - | 1.046852565 | 0% (0.49) |
| E9PF74_HUMAN (+3) | 2BIG_HUMAN   | HLA-DRB1 | Q29974 | HLA class II histocompatibility antigen, DRB1-16 beta chain (MHC class II antigen DRB1*16) (DR-16) (DR16)                                                                                                                                                                                                                                   | 30 kDa  | 0.23  | 48  | 26  | 22  | 0  | 7  | 7  | 0  | 0  | 4  | 0  | 10 | - | 1.046852565 | 0% (0.49) |
| Q86UA3_HUMAN      | AMPN_HUMAN   | ANPEP    | P15144 | Aminopeptidase N (AP-N) (hAPN) (EC 3.4.11.2) (Alanyl aminopeptidase) (Aminopeptidase M) (AP-M) (Microsomal aminopeptidase) (Myeloid plasma membrane glycoprotein CD13) (gp150) (CD antigen CD13)                                                                                                                                            | 110 kDa | 0.09  | 161 | 87  | 74  | 43 | 15 | 26 | 6  | 3  | 15 | 28 | 26 | - | 1.04752819  | 0% (0.42) |
| EXOS2_HUMAN       | AP2A1_HUMAN  | AP2A1    | Q95782 | AP-2 complex subunit alpha-1 (100 kDa coated vesicle protein A) (Adapter-related protein complex 2 subunit alpha-1) (Adaptor protein complex AP-2 subunit alpha-1) (Alpha-adaptin A) (Alpha1-adaptin) (Clathrin assembly protein complex 2 alpha-A large chain) (Plasma membrane adaptor HA2/AP2 adaptin alpha A subunit)                   | 108 kDa | 0.21  | 99  | 53  | 45  | 14 | 17 | 12 | 10 | 8  | 11 | 14 | 11 | - | 1.047700025 | 0% (0.45) |
| A8K3B0_HUMAN (+2) | J3KN00_HUMAN | NDUFA13  | J3KN00 | NADH dehydrogenase (Ubiquinone) 1 alpha subcomplex, 13 (NADH dehydrogenase [ubiquinone] 1 alpha subcomplex subunit 13)                                                                                                                                                                                                                      | 26 kDa  | 0.19  | 35  | 19  | 16  | 10 | 3  | 2  | 5  | 6  | 4  | 4  | 2  | - | 1.048519047 | 0% (0.50) |
| A9CQZ8_HUMAN (+2) | A0JLQ5_HUMAN | BXDC2    | A0JLQ5 | BXDC2 protein (Fragment)                                                                                                                                                                                                                                                                                                                    | 39 kDa  | 0.033 | 35  | 19  | 16  | 3  | 6  | 4  | 5  | 3  | 3  | 4  | 4  | - | 1.048519047 | 0% (0.50) |
| SBP1_HUMAN        | GCDH_HUMAN   | GCDH     | Q92947 | Glutaryl-CoA dehydrogenase, mitochondrial (GCD) (EC 1.3.8.6)                                                                                                                                                                                                                                                                                | 48 kDa  | 0.17  | 35  | 19  | 16  | 4  | 3  | 2  | 10 | 9  | 0  | 1  | 6  | - | 1.048519047 | 0% (0.50) |
| A8K4Q9_HUMAN (+2) | B4DLC3_HUMAN |          | B4DLC3 | Claudin                                                                                                                                                                                                                                                                                                                                     | 18 kDa  | 0.13  | 35  | 19  | 16  | 5  | 5  | 4  | 6  | 7  | 0  | 2  | 7  | - | 1.048519047 | 0% (0.50) |
| B3KQF4_HUMAN (+2) | RM09_HUMAN   | MRPL9    | Q9BYD2 | 39S ribosomal protein L9, mitochondrial (L9mt) (MRP-L9)                                                                                                                                                                                                                                                                                     | 30 kDa  | 0.19  | 35  | 19  | 16  | 6  | 4  | 3  | 6  | 5  | 2  | 2  | 7  | - | 1.048519047 | 0% (0.50) |
| F8VY86_HUMAN (+1) | B4DEK2_HUMAN |          | B4DEK2 | cDNA FLJ59182, highly similar to Splicing factor, arginine/serine-rich 7                                                                                                                                                                                                                                                                    | 19 kDa  | 0.037 | 35  | 19  | 16  | 4  | 5  | 4  | 6  | 7  | 3  | 3  | 2  | - | 1.048519047 | 0% (0.50) |
| B4E259_HUMAN      | SP16H_HUMAN  | SUPT16H  | Q9Y5B9 | FACT complex subunit SPT16 (Chromatin-specific transcription elongation factor 140 kDa subunit) (FACT 140 kDa subunit) (FACTp140) (Facilitates chromatin transcription complex subunit SPT16) (hSPT16)                                                                                                                                      | 120 kDa | 0.11  | 85  | 46  | 39  | 6  | 14 | 10 | 16 | 26 | 4  | 7  | 3  | - | 1.048535887 | 0% (0.46) |
| COTL1_HUMAN       | U520_HUMAN   | SNRNP200 | O75643 | US small nuclear ribonucleoprotein 200 kDa helicase (EC 3.6.4.13) (Activating signal co-integrator 1 complex subunit 3-like 1) (BRR2 homolog) (US snRNP-specific 200 kDa protein) (US-200KD)                                                                                                                                                | 245 kDa | 0.2   | 259 | 140 | 119 | 23 | 43 | 47 | 27 | 29 | 11 | 50 | 30 | - | 1.049241664 | 0% (0.38) |
| ABCE1_HUMAN       | DDB1_HUMAN   | DDB1     | Q16531 | DNA damage-binding protein 1 (DDB p127 subunit) (DNA damage-binding protein a) (DDBa) (Damage-specific DNA-binding protein 1) (HBV X-associated protein 1) (XAP-1) (UV-damaged DNA-binding factor) (UV-damaged DNA-binding protein 1) (UV-DDB 1) (XPE-binding factor) (XPE-BF) (Xeroderma pigmentosum group E-complementing protein) (XPCe) | 127 kDa | 0.11  | 107 | 59  | 50  | 11 | 16 | 17 | 15 | 19 | 2  | 23 | 4  | - | 1.05006063  | 0% (0.44) |

|                    |              |          |        |                                                                                                                                                                                                                    |         |       |     |     |     |    |    |    |    |    |    |    |    |   |             |           |
|--------------------|--------------|----------|--------|--------------------------------------------------------------------------------------------------------------------------------------------------------------------------------------------------------------------|---------|-------|-----|-----|-----|----|----|----|----|----|----|----|----|---|-------------|-----------|
| E7EMW7_HUMAN (+2)  | HSP71_HUMAN  | HSPA1A   | P08107 | Heat shock 70 kDa protein 1A/1B (Heat shock 70 kDa protein 1/2) (HSP70-1/HSP70-2) (HSP70.1/HSP70.2)                                                                                                                | 70 kDa  | 0.016 | 415 | 225 | 191 | 40 | 66 | 55 | 64 | 53 | 36 | 64 | 40 | - | 1.051281424 | 0% (0.34) |
| SRRM2_HUMAN        | D3DQ69_HUMAN | SERBP1   | D3DQ69 | SERPINE1 mRNA binding protein 1, isoform CRA_c                                                                                                                                                                     | 49 kDa  | 0.011 | 22  | 12  | 10  | 2  | 2  | 5  | 4  | 4  | 0  | 3  | 3  | - | 1.051967143 | 0% (0.53) |
| E9PPFA8_HUMAN (+4) | XPR1_HUMAN   | XPR1     | Q9UBH6 | Xenotropic and polytropic retrovirus receptor 1 (Protein SYG1 homolog) (Xenotropic and polytropic murine leukemia virus receptor X3) (X-receptor)                                                                  | 82 kDa  | 0.073 | 22  | 12  | 10  | 1  | 5  | 4  | 2  | 3  | 2  | 3  | 2  | - | 1.051967143 | 0% (0.53) |
| CAPR1_HUMAN        | O19707_HUMAN | HLA-DQB1 | O19707 | MHC class II HLA-DQ-beta-1 (Fragment)                                                                                                                                                                              | 26 kDa  | 0.048 | 21  | 12  | 10  | 1  | 4  | 3  | 3  | 0  | 2  | 1  | 7  | - | 1.051967143 | 0% (0.53) |
| B4E0U6_HUMAN (+2)  | SERPH_HUMAN  | SERPINH1 | P50454 | Serpin H1 (47 kDa heat shock protein) (Arsenic-transactivated protein 3) (ASTP3) (Cell proliferation-inducing gene 14 protein) (Collagen-binding protein) (Colligin) (Rheumatoid arthritis-related antigen RA-A47) | 46 kDa  | 0.11  | 315 | 171 | 145 | 38 | 53 | 43 | 38 | 33 | 35 | 39 | 38 | - | 1.052073535 | 0% (0.36) |
| A8K521_HUMAN       | ASPH_HUMAN   | ASPH     | Q12797 | Aspartyl/asparaginyl beta-hydroxylase (EC 1.14.1.16) (Aspartate beta-hydroxylase) (ASP beta-hydroxylase) (Peptide-aspartate beta-dioxygenase)                                                                      | 86 kDa  | 0.084 | 83  | 45  | 38  | 20 | 12 | 7  | 6  | 9  | 7  | 11 | 11 | - | 1.052495178 | 0% (0.45) |
| S2540_HUMAN        | B3KRY3_HUMAN | B3KRY3   | B3KRY3 | cDNA FLJ35079 fis, clone PLACE6005283, highly similar to Lysosome-associated membrane glycoprotein 1                                                                                                               | 43 kDa  | 0.15  | 45  | 25  | 21  | 7  | 6  | 6  | 6  | 5  | 1  | 5  | 10 | - | 1.053760542 | 0% (0.48) |
| AGO2_HUMAN         | A7E2Y5_HUMAN | DNAJC13  | A7E2Y5 | DnaJ (Hsp40) homolog, subfamily C, member 13                                                                                                                                                                       | 254 kDa | 0.1   | 129 | 70  | 59  | 25 | 21 | 19 | 5  | 15 | 6  | 21 | 17 | - | 1.056292441 | 0% (0.42) |
| LRC47_HUMAN        | ATP5H_HUMAN  | ATP5H    | O75947 | ATP synthase subunit d, mitochondrial (ATPase subunit d)                                                                                                                                                           | 18 kDa  | 0.14  | 57  | 31  | 26  | 6  | 7  | 6  | 12 | 3  | 6  | 5  | 12 | - | 1.057080585 | 0% (0.47) |
| B4DWA0_HUMAN (+1)  | SYDM_HUMAN   | DARS2    | Q6P148 | Aspartate-tRNA ligase, mitochondrial (EC 6.1.1.12) (Aspartyl-tRNA synthetase) (AsPRS)                                                                                                                              | 74 kDa  | 0.076 | 58  | 31  | 26  | 8  | 12 | 5  | 7  | 12 | 1  | 6  | 7  | - | 1.057080585 | 0% (0.47) |
| B4E1L5_HUMAN (+1)  | OCAD1_HUMAN  | OCIAD1   | Q9NX40 | OCIA domain-containing protein 1 (Ovarian carcinoma immunoreactive antigen)                                                                                                                                        | 28 kDa  | 0.14  | 57  | 31  | 26  | 13 | 6  | 3  | 9  | 3  | 10 | 6  | 7  | - | 1.057080585 | 0% (0.47) |
| USMG5_HUMAN        | LYAG_HUMAN   | GAA      | P10253 | Lysosomal alpha-glucosidase (EC 3.2.1.20) (Acid maltase) (Aglucosidase alpha) [Cleaved into: 76 kDa lysosomal alpha-glucosidase; 70 kDa lysosomal alpha-glucosidase]                                               | 105 kDa | 0.43  | 57  | 31  | 26  | 4  | 13 | 7  | 7  | 7  | 6  | 8  | 5  | - | 1.057080585 | 0% (0.47) |
| IVD_HUMAN (+2)     | MESD_HUMAN   | MESDC2   | Q14696 | LDLR chaperone MESD (Mesoderm development candidate 2) (Mesoderm development protein) (Renal carcinoma antigen NY-REN-61)                                                                                          | 26 kDa  | 0.14  | 34  | 18  | 15  | 4  | 6  | 2  | 7  | 1  | 3  | 4  | 7  | - | 1.058079821 | 0% (0.50) |
| MCA3_HUMAN         | Q5QPL9_HUMAN | RALY     | Q5QPL9 | RNA-binding protein Raly (Fragment)                                                                                                                                                                                | 25 kDa  | 0.19  | 33  | 18  | 15  | 4  | 4  | 5  | 6  | 4  | 3  | 3  | 5  | - | 1.058079821 | 0% (0.50) |
| TI23B_HUMAN        | F8VQX6_HUMAN | METTL7A  | F8VQX6 | Methyltransferase-like protein 7A (Fragment)                                                                                                                                                                       | 21 kDa  | 0.11  | 33  | 18  | 15  | 4  | 2  | 5  | 7  | 4  | 4  | 4  | 3  | - | 1.058079821 | 0% (0.50) |
| A8K800_HUMAN (+4)  | ASNA_HUMAN   | ASNA1    | O43681 | ATPase ASNA1 (EC 3.6.--) (Arsenic pump-driving ATPase) (Arsenite-stimulated ATPase) (Transmembrane domain recognition complex 40 kDa ATPase subunit) (hARSA-I) (hASNA-I)                                           | 39 kDa  | 0.13  | 33  | 18  | 15  | 5  | 4  | 3  | 6  | 6  | 0  | 5  | 4  | - | 1.058079821 | 0% (0.50) |
| B7Z587_HUMAN (+1)  | B4DH58_HUMAN | B4DH58   | B4DH58 | cDNA FLJ56344, highly similar to Implantation-associated protein                                                                                                                                                   | 41 kDa  | 0.18  | 33  | 18  | 15  | 7  | 6  | 3  | 3  | 1  | 7  | 3  | 5  | - | 1.058079821 | 0% (0.50) |



|                   |              |          |        |                                                                                                                                                                                                  |         |       |     |     |     |    |     |     |    |    |    |     |     |   |             |           |
|-------------------|--------------|----------|--------|--------------------------------------------------------------------------------------------------------------------------------------------------------------------------------------------------|---------|-------|-----|-----|-----|----|-----|-----|----|----|----|-----|-----|---|-------------|-----------|
| B2R4C1_HUMAN (+1) | PECA1_HUMAN  | PECAM1   | P16284 | Platelet endothelial cell adhesion molecule (PECAM-1) (EndoCAM) (GPIIA') (PECA1) (CD antigen CD31)                                                                                               | 83 kDa  | 0.18  | 33  | 18  | 15  | 3  | 7   | 5   | 3  | 0  | 4  | 7   | 4   | - | 1.058079821 | 0% (0.50) |
| A8K4M4_HUMAN (+1) | COX41_HUMAN  | COX41    | P13073 | Cytochrome c oxidase subunit 4 isoform 1, mitochondrial (Cytochrome c oxidase polypeptide IV) (Cytochrome c oxidase subunit IV isoform 1) (COX IV-1)                                             | 20 kDa  | 0.076 | 90  | 50  | 42  | 12 | 13  | 10  | 15 | 13 | 8  | 9   | 11  | - | 1.058421637 | 0% (0.43) |
| K7ERC8_HUMAN      | E7ENR4_HUMAN | HK1      | E7ENR4 | Hexokinase-1                                                                                                                                                                                     | 106 kDa | 0.21  | 160 | 87  | 73  | 16 | 26  | 24  | 22 | 10 | 32 | 19  | 13  | - | 1.061651601 | 0% (0.39) |
| GOGA2_HUMAN       | Q7Z7M4_HUMAN | SOD2     | Q7Z7M4 | Superoxide dismutase (EC 1.15.1.1) (Fragment)                                                                                                                                                    | 24 kDa  | 0.09  | 252 | 137 | 115 | 34 | 42  | 45  | 16 | 7  | 37 | 24  | 48  | - | 1.062313245 | 0% (0.35) |
| MAGD2_HUMAN       | ENPL_HUMAN   | HSP90B1  | P14625 | Endoplasmic (94 kDa glucose-regulated protein) (GRP-94) (Heat shock protein 90 kDa beta member 1) (Tumor rejection antigen 1) (gp96 homolog)                                                     | 92 kDa  | 0.059 | 652 | 356 | 299 | 83 | 114 | 101 | 60 | 37 | 52 | 105 | 104 | - | 1.063022806 | 0% (0.24) |
| H3BN55_HUMAN (+1) | TTL12_HUMAN  | TTL12    | Q14166 | Tubulin-tyrosine ligase-like protein 12                                                                                                                                                          | 74 kDa  | 0.36  | 8   | 5   | 4   | 0  | 1   | 0   | 3  | 1  | 3  | 0   | 0   | - | 1.063305248 | 0% (0.57) |
| WDR61_HUMAN       | LAP2_HUMAN   | ERBB2IP  | Q96RT1 | Protein LAP2 (Densin-180-like protein) (ErbB2-interacting protein) (Erbin)                                                                                                                       | 158 kDa | 0.15  | 9   | 5   | 4   | 3  | 0   | 2   | 0  | 1  | 0  | 2   | 1   | - | 1.063305248 | 0% (0.57) |
| B2R802_HUMAN (+1) | CDC73_HUMAN  | CDC73    | Q6P1J9 | Parafibromin (Cell division cycle protein 73 homolog) (Hyperparathyroidism 2 protein)                                                                                                            | 61 kDa  | 0.17  | 9   | 5   | 4   | 0  | 1   | 2   | 2  | 1  | 1  | 2   | 0   | - | 1.063305248 | 0% (0.57) |
| IF4A2_HUMAN       | B1ALA9_HUMAN | PRPS1    | B1ALA9 | Ribose-phosphate pyrophosphokinase 1                                                                                                                                                             | 24 kDa  | 0.36  | 9   | 5   | 4   | 0  | 4   | 1   | 0  | 0  | 4  | 0   | 0   | - | 1.063305248 | 0% (0.57) |
| K0020_HUMAN       | A8K2N5_HUMAN |          | A8K2N5 | Integrin beta                                                                                                                                                                                    | 86 kDa  | 0.052 | 9   | 5   | 4   | 1  | 2   | 2   | 0  | 0  | 1  | 0   | 3   | - | 1.063305248 | 0% (0.57) |
| B4E2W6_HUMAN (+1) | CATH_HUMAN   | CTSH     | P09668 | Pro-cathepsin H [Cleaved into: Cathepsin H mini chain; Cathepsin H (EC 3.4.22.16); Cathepsin H heavy chain; Cathepsin H light chain]                                                             | 37 kDa  | 0.045 | 9   | 5   | 4   | 0  | 2   | 3   | 0  | 0  | 0  | 3   | 1   | - | 1.063305248 | 0% (0.57) |
| CO6A1_HUMAN       | I2BPL_HUMAN  | IRF2BPL  | Q9H1B7 | Interferon regulatory factor 2-binding protein-like (Enhanced at puberty protein 1)                                                                                                              | 83 kDa  | 0.071 | 9   | 5   | 4   | 0  | 2   | 2   | 1  | 1  | 0  | 3   | 1   | - | 1.063305248 | 0% (0.57) |
| MYEF2_HUMAN       | PLRKT_HUMAN  | PLGRKT   | Q9HBL7 | Plasminogen receptor (KT) (Plg-R(KT))                                                                                                                                                            | 17 kDa  | 0.075 | 9   | 5   | 4   | 3  | 1   | 0   | 1  | 0  | 2  | 0   | 2   | - | 1.063305248 | 0% (0.57) |
| MX2_HUMAN         | C9JZ87_HUMAN | TMEM106B | C9JZ87 | Transmembrane protein 106B (Fragment)                                                                                                                                                            | 12 kDa  | 0.24  | 9   | 5   | 4   | 5  | 0   | 0   | 0  | 0  | 1  | 1   | 2   | - | 1.063305248 | 0% (0.57) |
| ID11_HUMAN        | TF3C4_HUMAN  | GTF3C4   | Q9UKN8 | General transcription factor 3C polypeptide 4 (EC 2.3.1.48) (TF3C-delta) (Transcription factor IIIC 90 kDa subunit) (TFIIIC 90 kDa subunit) (TFIIIC90) (Transcription factor IIIC subunit delta) | 92 kDa  | 0.093 | 9   | 5   | 4   | 0  | 0   | 3   | 2  | 2  | 0  | 1   | 0   | - | 1.063305248 | 0% (0.57) |
| WDR43_HUMAN       | C9JTZ6_HUMAN | NT5DC2   | C9JTZ6 | 5'-nucleotidase domain-containing protein 2                                                                                                                                                      | 61 kDa  | 0.034 | 9   | 5   | 4   | 0  | 2   | 3   | 0  | 2  | 0  | 2   | 0   | - | 1.063305248 | 0% (0.57) |
| E9PH70_HUMAN (+1) | B3KW23_HUMAN |          | B3KW23 | cDNA FLJ41961 fis, clone PUAEN2004083, highly similar to Nucleoporin p58/p45                                                                                                                     | 59 kDa  | 0.048 | 9   | 5   | 4   | 0  | 0   | 2   | 3  | 0  | 0  | 3   | 1   | - | 1.063305248 | 0% (0.57) |
| TM9S4_HUMAN       | RT31_HUMAN   | MRPS31   | Q92665 | 28S ribosomal protein S31, mitochondrial (MRP-S31) (S31mt) (Imogen 38)                                                                                                                           | 45 kDa  | 0.047 | 9   | 5   | 4   | 3  | 0   | 1   | 1  | 1  | 0  | 0   | 3   | - | 1.063305248 | 0% (0.57) |
| CAB39_HUMAN       | B2R4F3_HUMAN |          | B2R4F3 | cDNA, FLJ92068, highly similar to Homo sapiens Rho GDP dissociation inhibitor (GDI) beta (ARHGD1B).mRNA                                                                                          | 23 kDa  | 0.097 | 9   | 5   | 4   | 1  | 2   | 1   | 1  | 1  | 1  | 1   | 1   | - | 1.063305248 | 0% (0.57) |
| B1PL87_HUMAN (+3) | B5MCC7_HUMAN | ACP1     | B5MCC7 | Low molecular weight phosphotyrosine protein phosphatase                                                                                                                                         | 12 kDa  | 0.22  | 10  | 5   | 4   | 0  | 2   | 1   | 2  | 1  | 2  | 1   | 0   | - | 1.063305248 | 0% (0.57) |

|                   |              |         |         |                                                                                                                                                                                                        |        |       |     |     |     |    |    |    |    |    |    |    |    |   |             |           |
|-------------------|--------------|---------|---------|--------------------------------------------------------------------------------------------------------------------------------------------------------------------------------------------------------|--------|-------|-----|-----|-----|----|----|----|----|----|----|----|----|---|-------------|-----------|
| B4DE16_HUMAN (+2) | RM14_HUMAN   | MRPL14  | Q6PIL8  | 39S ribosomal protein L14, mitochondrial (L14mt) (MRP-L14) (39S ribosomal protein L32, mitochondrial) (L32mt) (MRP-L32)                                                                                | 16 kDa | 0.082 | 9   | 5   | 4   | 2  | 2  | 1  | 0  | 2  | 0  | 0  | 2  | - | 1.063305248 | 0% (0.57) |
| B7ZKL3_HUMAN      | B4DFY5_HUMAN | MAP2K1  | B4DFY5  | Mitogen-activated protein kinase kinase 1, isoform CRA_d (cDNA FLJ58770, highly similar to Dual specificity mitogen-activated protein kinase kinase 1 (EC 2.7.12.2))                                   | 41 kDa | 0.13  | 9   | 5   | 4   | 0  | 2  | 0  | 3  | 0  | 2  | 2  | 0  | - | 1.063305248 | 0% (0.57) |
| PCKGC_HUMAN       | B4DIB1_HUMAN |         | B4DIB1  | cDNA FLJ55065, highly similar to Integral membrane protein 2C                                                                                                                                          | 25 kDa | 0.25  | 9   | 5   | 4   | 1  | 1  | 3  | 0  | 4  | 0  | 0  | 0  | - | 1.063305248 | 0% (0.57) |
| B4DDM6_HUMAN (+2) | COX20_HUMAN  | COX20   | Q5RI15  | Cytochrome c oxidase protein 20 homolog                                                                                                                                                                | 13 kDa | 0.13  | 9   | 5   | 4   | 1  | 1  | 1  | 2  | 1  | 1  | 1  | 1  | - | 1.063305248 | 0% (0.57) |
| RT25_HUMAN        | LYPL1_HUMAN  | LYPLAL1 | Q5VVWZ2 | Lysophospholipase-like protein 1 (EC 3.1.2.-)                                                                                                                                                          | 26 kDa | 0.21  | 9   | 5   | 4   | 0  | 2  | 2  | 1  | 3  | 0  | 0  | 1  | - | 1.063305248 | 0% (0.57) |
| Q59F44_HUMAN      | E9PBR6_HUMAN | TMEM201 | E9PBR6  | Transmembrane protein 201                                                                                                                                                                              | 70 kDa | 0.2   | 9   | 5   | 4   | 4  | 0  | 0  | 1  | 2  | 0  | 0  | 2  | - | 1.063305248 | 0% (0.57) |
| A8MV58_HUMAN (+1) | CATD_HUMAN   | CTSD    | P07339  | Cathepsin D (EC 3.4.23.5) [Cleaved into: Cathepsin D light chain; Cathepsin D heavy chain]                                                                                                             | 45 kDa | 0.039 | 359 | 196 | 164 | 53 | 46 | 50 | 47 | 18 | 28 | 55 | 63 | - | 1.066299358 | 0% (0.30) |
| A2RTY6_HUMAN (+3) | APOA1_HUMAN  | APOA1   | P02647  | Apolipoprotein A-I (Apo-AI) (ApoA-I) (Apolipoprotein A1) [Cleaved into: Truncated apolipoprotein A-I (Apolipoprotein A-I(1-242))]                                                                      | 31 kDa | 0.055 | 20  | 11  | 9   | 1  | 2  | 0  | 8  | 1  | 1  | 0  | 7  | - | 1.067460246 | 0% (0.52) |
| SF01_HUMAN        | HPRT_HUMAN   | HPRT1   | P00492  | Hypoxanthine-guanine phosphoribosyltransferase (HGPR1) (HGPR1ase) (EC 2.4.2.8)                                                                                                                         | 25 kDa | 0.045 | 20  | 11  | 9   | 0  | 1  | 4  | 6  | 5  | 2  | 2  | 0  | - | 1.067460246 | 0% (0.52) |
| CACP_HUMAN        | Q86XM2_HUMAN | ADD1    | Q86XM2  | ADD1 protein (Adducin 1 (Alpha)) (Alpha-adducin)                                                                                                                                                       | 73 kDa | 0.12  | 20  | 11  | 9   | 1  | 5  | 3  | 2  | 1  | 1  | 5  | 2  | - | 1.067460246 | 0% (0.52) |
| MET7B_HUMAN       | URP2_HUMAN   | FERMT3  | Q86UX7  | Fermitin family homolog 3 (Kindlin-3) (MIG2-like protein) (Unc-112-related protein 2)                                                                                                                  | 76 kDa | 0.16  | 19  | 11  | 9   | 0  | 2  | 8  | 1  | 0  | 4  | 1  | 4  | - | 1.067460246 | 0% (0.52) |
| F13A_HUMAN        | A8K7S8_HUMAN |         | A8K7S8  | cDNA FLJ75165, highly similar to Homo sapiens BCL2-antagonist/killer 1 (BAK1), mRNA                                                                                                                    | 23 kDa | 0.12  | 20  | 11  | 9   | 1  | 2  | 3  | 5  | 2  | 1  | 3  | 3  | - | 1.067460246 | 0% (0.52) |
| IFIT2_HUMAN (+2)  | MCA3_HUMAN   | EEF1E1  | O43324  | Eukaryotic translation elongation factor 1 epsilon-1 (Aminoacyl tRNA synthetase complex-interacting multifunctional protein 3) (Elongation factor p18) (Multisynthase complex auxiliary component p18) | 20 kDa | 0.12  | 20  | 11  | 9   | 1  | 2  | 2  | 6  | 2  | 3  | 2  | 2  | - | 1.067460246 | 0% (0.52) |
| PTPM1_HUMAN       | NAMPT_HUMAN  | NAMPT   | P43490  | Nicotinamide phosphoribosyltransferase (NAMPTase) (Nampt) (EC 2.4.2.12) (Pre-B-cell colony-enhancing factor 1) (Pre-B cell-enhancing factor) (Visfatin)                                                | 56 kDa | 0.27  | 108 | 60  | 50  | 3  | 21 | 24 | 12 | 7  | 19 | 16 | 9  | - | 1.067502748 | 0% (0.40) |
| CYB5B_HUMAN (+5)  | RL11_HUMAN   | RPL11   | P62913  | 60S ribosomal protein L11 (CLL-associated antigen KW-12)                                                                                                                                               | 20 kDa | 0.089 | 31  | 17  | 14  | 4  | 4  | 4  | 5  | 5  | 4  | 2  | 3  | - | 1.068894287 | 0% (0.49) |
| 1433T_HUMAN       | B2RBB2_HUMAN |         | B2RBB2  | cDNA, FL195416, highly similar to Homo sapiens phosphatidylinositol glycan, class S (PIGS), mRNA                                                                                                       | 62 kDa | 0.22  | 31  | 17  | 14  | 7  | 2  | 2  | 6  | 5  | 1  | 1  | 7  | - | 1.068894287 | 0% (0.49) |
| B4DJV9_HUMAN (+2) | DEK_HUMAN    | DEK     | P35659  | Protein DEK                                                                                                                                                                                            | 43 kDa | 0.095 | 42  | 23  | 19  | 2  | 6  | 7  | 8  | 5  | 5  | 5  | 4  | - | 1.069622894 | 0% (0.47) |
| B4DRW3_HUMAN      | MIRO2_HUMAN  | RHOT2   | Q8IXI1  | Mitochondrial Rho GTPase 2 (MIRO-2) (hMiro-2) (EC 3.6.5.-) (Ras homolog gene family member T2)                                                                                                         | 68 kDa | 0.091 | 42  | 23  | 19  | 8  | 6  | 6  | 3  | 3  | 2  | 8  | 6  | - | 1.069622894 | 0% (0.47) |

|                   |              |          |        |                                                                                                                                                                                                        |        |       |     |     |     |    |    |    |    |    |    |    |    |                      |              |
|-------------------|--------------|----------|--------|--------------------------------------------------------------------------------------------------------------------------------------------------------------------------------------------------------|--------|-------|-----|-----|-----|----|----|----|----|----|----|----|----|----------------------|--------------|
| FABP5_HUMAN       | RADL_HUMAN   | RDX      | P35241 | Radixin                                                                                                                                                                                                | 69 kDa | 0.29  | 73  | 41  | 34  | 9  | 12 | 11 | 10 | 0  | 0  | 0  | 8  | -<br>1.0705779<br>66 | 0%<br>(0.43) |
| STX8_HUMAN        | RAP1B_HUMAN  | RAP1B    | P61224 | Ras-related protein Rap-1b (GTP-binding protein smg p21B)                                                                                                                                              | 21 kDa | 0.18  | 97  | 53  | 44  | 13 | 11 | 17 | 11 | 10 | 13 | 14 | 7  | -<br>1.0708690<br>3  | 0%<br>(0.41) |
| B2R983_HUMAN (+1) | FACE1_HUMAN  | ZMPSTE24 | O75844 | CAAX prenyl protease 1 homolog (EC 3.4.24.84) (Farnesylated proteins-converting enzyme 1) (FACE-1) (Prenyl protein-specific endoprotease 1) (Zinc metalloproteinase Ste24 homolog)                     | 55 kDa | 0.2   | 128 | 71  | 59  | 17 | 19 | 15 | 20 | 17 | 12 | 12 | 17 | -<br>1.0711313<br>72 | 0%<br>(0.38) |
| LPCT4_HUMAN       | B2RA56_HUMAN |          | B2RA56 | cDNA, FLJ94705, highly similar to Homo sapiens nicalin (LOC56926), mRNA                                                                                                                                | 62 kDa | 0.12  | 125 | 70  | 58  | 32 | 9  | 10 | 21 | 7  | 15 | 14 | 22 | -<br>1.0741356<br>25 | 0%<br>(0.38) |
| Q5LJA0_HUMAN (+1) | Q29849_HUMAN |          | Q29849 | Lymphocyte antigen                                                                                                                                                                                     | 40 kDa | 0.12  | 106 | 58  | 48  | 17 | 0  | 0  | 0  | 0  | 9  | 0  | 19 | -<br>1.0745836<br>62 | 0%<br>(0.39) |
| A8K6G9_HUMAN (+2) | A8K787_HUMAN |          | A8K787 | cDNA FLJ75273, highly similar to Homo sapiens solute carrier family 25 (mitochondrial carrier; adenine nucleotide translocator), member 4, mRNA                                                        | 33 kDa | 0.032 | 338 | 182 | 151 | 49 | 43 | 36 | 56 | 35 | 44 | 38 | 35 | -<br>1.0752102<br>02 | 0%<br>(0.28) |
| ARF6_HUMAN (+1)   | A8K3A8_HUMAN |          | A8K3A8 | cDNA FLJ75085, highly similar to Homo sapiens glutamyl-tRNA synthetase (QARS), mRNA                                                                                                                    | 88 kDa | 0.18  | 62  | 34  | 28  | 6  | 9  | 9  | 10 | 6  | 9  | 8  | 4  | -<br>1.0764215<br>46 | 0%<br>(0.43) |
| B2R9L0_HUMAN (+3) | Q96MH4_HUMAN |          | Q96MH4 | cDNA FLJ32377 fis, clone SKMUS1000014, highly similar to Polyubiquitin 9                                                                                                                               | 44 kDa | 0.15  | 126 | 69  | 57  | 21 | 17 | 16 | 18 | 16 | 15 | 12 | 14 | -<br>1.0772429<br>81 | 0%<br>(0.37) |
| AN32A_HUMAN (+3)  | HNRPD_HUMAN  | HNRNPD   | Q14103 | Heterogeneous nuclear ribonucleoprotein D0 (hnRNP D0) (AU-rich element RNA-binding protein 1)                                                                                                          | 38 kDa | 0.25  | 126 | 69  | 57  | 9  | 17 | 22 | 21 | 14 | 10 | 25 | 8  | -<br>1.0772429<br>81 | 0%<br>(0.37) |
| A8K964_HUMAN (+1) | B3KNK5_HUMAN |          | B3KNK5 | cDNA FLJ14795 fis, clone NT2RP4001219, highly similar to Homo sapiens DnaJ (Hsp40) homolog, subfamily C, member 10 (DNAJC10), mRNA                                                                     | 69 kDa | 0.077 | 40  | 22  | 18  | 9  | 2  | 6  | 5  | 3  | 3  | 2  | 10 | -<br>1.0787898<br>84 | 0%<br>(0.46) |
| LSM1_HUMAN        | DAD1_HUMAN   | DAD1     | P61803 | Dolichyl-diphosphoglycerate--protein glycosyltransferase subunit DAD1 (Oligosaccharyl transferase subunit DAD1) (EC 2.4.99.18) (Defender against cell death 1) (DAD-1)                                 | 12 kDa | 0.3   | 40  | 22  | 18  | 7  | 4  | 5  | 7  | 5  | 4  | 4  | 5  | -<br>1.0787898<br>84 | 0%<br>(0.46) |
| Q9H9B7_HUMAN      | H11_HUMAN    | HIST1H1A | Q02539 | Histone H1.1 (Histone H1a)                                                                                                                                                                             | 22 kDa | 0.11  | 40  | 22  | 18  | 0  | 0  | 0  | 13 | 0  | 0  | 0  | 5  | -<br>1.0787898<br>84 | 0%<br>(0.46) |
| E9PHY8_HUMAN (+1) | TPM1_HUMAN   | TPM1     | P09493 | Tropomyosin alpha-1 chain (Alpha-tropomyosin) (Tropomyosin-1)                                                                                                                                          | 33 kDa | 0.047 | 39  | 22  | 18  | 4  | 0  | 7  | 6  | 0  | 0  | 5  | 0  | -<br>1.0787898<br>84 | 0%<br>(0.46) |
| FDFT_HUMAN        | B4DY09_HUMAN |          | B4DY09 | cDNA FLJ51660, highly similar to Interleukin enhancer-binding factor 2                                                                                                                                 | 39 kDa | 0.2   | 210 | 115 | 95  | 21 | 33 | 26 | 36 | 26 | 9  | 28 | 34 | -<br>1.0788841<br>66 | 0%<br>(0.32) |
| BRE_HUMAN (+1)    | Q53G99_HUMAN |          | Q53G99 | Beta actin variant (Fragment)                                                                                                                                                                          | 42 kDa | 0.073 | 675 | 371 | 307 | 90 | 93 | 90 | 99 | 65 | 77 | 98 | 70 | -<br>1.0789936<br>16 | 0%<br>(0.18) |
| SEH1_HUMAN        | B4DJV2_HUMAN | CS       | B4DJV2 | Citrate synthase                                                                                                                                                                                       | 50 kDa | 0.064 | 228 | 126 | 104 | 28 | 36 | 29 | 32 | 45 | 16 | 20 | 23 | -<br>1.0799992<br>4  | 0%<br>(0.31) |
| C9JL85_HUMAN      | C9J9K3_HUMAN | RPSA     | C9J9K3 | 40S ribosomal protein SA (Fragment)                                                                                                                                                                    | 30 kDa | 0.52  | 180 | 97  | 80  | 15 | 24 | 28 | 30 | 21 | 24 | 22 | 15 | -<br>1.0801524<br>07 | 0%<br>(0.34) |
| Q59FB9_HUMAN (+1) | FCL_HUMAN    | TSTA3    | Q13630 | GDP-L-fucose synthase (EC 1.1.1.271) (GDP-4-keto-6-deoxy-D-mannose-3,5-epimerase-4-reductase) (Protein FX) (Red cell NADP(H)-binding protein) (Short-chain dehydrogenase/reductase family 4E member 1) | 36 kDa | 0.12  | 29  | 16  | 13  | 1  | 2  | 2  | 11 | 3  | 7  | 3  | 0  | -<br>1.0812263<br>8  | 0%<br>(0.48) |

|                   |              |        |        |                                                                                                                                                                                                                                                                      |         |       |     |     |     |    |    |    |    |    |    |    |    |   |    |
|-------------------|--------------|--------|--------|----------------------------------------------------------------------------------------------------------------------------------------------------------------------------------------------------------------------------------------------------------------------|---------|-------|-----|-----|-----|----|----|----|----|----|----|----|----|---|----|
| SRRT_HUMAN        | CLD3_HUMAN   | CLDN3  | O15551 | Claudin-3 (Clostridium perfringens enterotoxin receptor 2) (CPE-R 2) (CPE-receptor 2) (Rat ventral prostate.1 protein homolog) (hRVPI)                                                                                                                               | 23 kDa  | 0.026 | 29  | 16  | 13  | 5  | 2  | 2  | 7  | 6  | 1  | 3  | 3  | - | 0% |
| B5MCF9_HUMAN (+1) | D6RA47_HUMAN | MFSD10 | D6RA47 | Major facilitator superfamily domain-containing protein 10                                                                                                                                                                                                           | 39 kDa  | 0.089 | 29  | 16  | 13  | 8  | 4  | 2  | 2  | 1  | 3  | 4  | 5  | - | 0% |
| B7ZA00_HUMAN      | MGST3_HUMAN  | MGST3  | O14880 | Microsomal glutathione S-transferase 3 (Microsomal GST-3) (EC 2.5.1.18) (Microsomal GST-III)                                                                                                                                                                         | 17 kDa  | 0.089 | 71  | 39  | 32  | 14 | 8  | 8  | 9  | 8  | 9  | 7  | 8  | - | 0% |
| F5GZS0_HUMAN      | A8K7N0_HUMAN |        | A8K7N0 | cDNA FLJ75556, highly similar to Homo sapiens ribosomal protein L14, mRNA                                                                                                                                                                                            | 24 kDa  | 0.056 | 60  | 33  | 27  | 8  | 7  | 9  | 9  | 9  | 8  | 6  | 4  | - | 0% |
| RFA1_HUMAN        | MOQWZ7_HUMAN | SARS2  | MOQWZ7 | Serine--tRNA ligase, mitochondrial (Seryl-tRNA synthetase 2, isoform CRA_d)                                                                                                                                                                                          | 58 kDa  | 0.12  | 59  | 33  | 27  | 11 | 8  | 5  | 9  | 9  | 4  | 8  | 6  | - | 0% |
| J3QKR5_HUMAN      | ANXA5_HUMAN  | ANXA5  | P08758 | Annexin A5 (Anchorin CII) (Annexin V) (Annexin-5) (Calphobindin I) (CBP-I) (Endonexin II) (Lipocortin V) (Placental anticoagulant protein 4) (PP4) (Placental anticoagulant protein I) (PAP-I) (Thromboplastin inhibitor) (Vascular anticoagulant-alpha) (VAC-alpha) | 36 kDa  | 0.068 | 329 | 181 | 149 | 37 | 48 | 47 | 49 | 29 | 33 | 35 | 52 | - | 0% |
| RRS1_HUMAN        | PPIA_HUMAN   | PPP1CA | P62136 | Serine/threonine-protein phosphatase PP1-alpha catalytic subunit (PP-1A) (EC 3.1.3.16)                                                                                                                                                                               | 38 kDa  | 0.11  | 110 | 61  | 50  | 11 | 17 | 12 | 20 | 11 | 13 | 14 | 13 | - | 0% |
| MA1B1_HUMAN       | ACOT9_HUMAN  | ACOT9  | Q9Y305 | Acyl-coenzyme A thioesterase 9, mitochondrial (Acyl-CoA thioesterase 9) (EC 3.1.2.-) (Acyl-CoA thioester hydrolase 9)                                                                                                                                                | 50 kDa  | 0.09  | 80  | 44  | 36  | 17 | 12 | 10 | 5  | 0  | 11 | 7  | 18 | - | 0% |
| B3K562_HUMAN (+1) | RAB4B_HUMAN  | RAB4B  | P61018 | Ras-related protein Rab-4B                                                                                                                                                                                                                                           | 24 kDa  | 0.053 | 49  | 27  | 22  | 6  | 7  | 7  | 7  | 4  | 5  | 5  | 8  | - | 0% |
| A8KA19_HUMAN (+1) | B4DMF5_HUMAN |        | B4DMF5 | Glutamate dehydrogenase                                                                                                                                                                                                                                              | 57 kDa  | 0.1   | 471 | 258 | 212 | 73 | 61 | 60 | 66 | 56 | 66 | 32 | 61 | - | 0% |
| A4FTY4_HUMAN      | NDUB4_HUMAN  | NDUFB4 | O95168 | NADH dehydrogenase [ubiquinone] 1 beta subcomplex subunit 4 (Complex I-B15) (CI-B15) (NADH-ubiquinone oxidoreductase B15 subunit)                                                                                                                                    | 15 kDa  | 0.24  | 18  | 10  | 8   | 3  | 2  | 2  | 3  | 3  | 2  | 2  | 1  | - | 0% |
| ARPC5_HUMAN       | CYB5B_HUMAN  | CYB5B  | O43169 | Cytochrome b5 type B (Cytochrome b5 outer mitochondrial membrane isoform)                                                                                                                                                                                            | 16 kDa  | 0.26  | 18  | 10  | 8   | 3  | 1  | 4  | 2  | 1  | 4  | 1  | 2  | - | 0% |
| STX4_HUMAN        | B7ZKM8_HUMAN | SEC24B | B7ZKM8 | Protein transport protein Sec24B (SEC24B protein)                                                                                                                                                                                                                    | 140 kDa | 0.13  | 19  | 10  | 8   | 2  | 2  | 3  | 3  | 2  | 1  | 3  | 2  | - | 0% |
| EMC7_HUMAN (+1)   | B2R6E5_HUMAN |        | B2R6E5 | NADPH--cytochrome P450 reductase (EC 1.6.2.4)                                                                                                                                                                                                                        | 77 kDa  | 0.12  | 191 | 105 | 86  | 40 | 25 | 21 | 20 | 18 | 16 | 23 | 30 | - | 0% |
| PWP2_HUMAN        | H2AY_HUMAN   | H2AFY  | O75367 | Core histone macro-H2A.1 (Histone macroH2A1) (mH2A1) (Histone H2A.y) (H2A.y) (Medulloblastoma antigen MU-MB-50.205)                                                                                                                                                  | 40 kDa  | 0.064 | 323 | 177 | 145 | 66 | 35 | 33 | 43 | 37 | 32 | 36 | 40 | - | 0% |
| PP1B_HUMAN        | B2RAR6_HUMAN |        | B2RAR6 | cDNA, FLJ95068, highly similar to Homo sapiens eukaryotic translation elongation factor 1 delta (guanine nucleotide exchange protein) (EEF1D), transcript variant 1, mRNA                                                                                            | 71 kDa  | 0.31  | 38  | 21  | 17  | 1  | 6  | 5  | 9  | 6  | 4  | 3  | 4  | - | 0% |
| RM17_HUMAN        | B1AVU8_HUMAN | PSAP   | B1AVU8 | Sapoin-D                                                                                                                                                                                                                                                             | 62 kDa  | 0.2   | 57  | 32  | 26  | 9  | 10 | 8  | 5  | 2  | 3  | 9  | 11 | - | 0% |
| B4DZJ7_HUMAN (+2) | DSG2_HUMAN   | DSG2   | Q14126 | Desmoglein-2 (Cadherin family member 5) (HDGC)                                                                                                                                                                                                                       | 122 kDa | 0.057 | 58  | 32  | 26  | 7  | 9  | 11 | 6  | 8  | 1  | 7  | 10 | - | 0% |

|                   |              |         |        |                                                                                                                                                                                                                                                                                                                                               |         |       |     |    |    |    |    |    |    |    |    |    |    |                      |              |
|-------------------|--------------|---------|--------|-----------------------------------------------------------------------------------------------------------------------------------------------------------------------------------------------------------------------------------------------------------------------------------------------------------------------------------------------|---------|-------|-----|----|----|----|----|----|----|----|----|----|----|----------------------|--------------|
| NLRX1_HUMAN       | Q504R6_HUMAN | RAB13   | Q504R6 | RAB13 protein (Fragment)                                                                                                                                                                                                                                                                                                                      | 27 kDa  | 0.034 | 60  | 32 | 26 | 12 | 9  | 8  | 4  | 4  | 6  | 7  | 10 | -<br>1.0898722<br>86 | 0%<br>(0.42) |
| SPTC2_HUMAN       | SF3B1_HUMAN  | SF3B1   | O75533 | Splicing factor 3B subunit 1 (Pre-mRNA-splicing factor SF3b155 kDa subunit) (SF3b155) (Spliceosome-associated protein 155) (SAP155)                                                                                                                                                                                                           | 146 kDa | 0.08  | 98  | 54 | 44 | 13 | 13 | 12 | 16 | 3  | 7  | 21 | 13 | -<br>1.0906225<br>73 | 0%<br>(0.37) |
| B7Z532_HUMAN      | ACSL3_HUMAN  | ACSL3   | O95573 | Long-chain-fatty-acid--CoA ligase 3 (EC 6.2.1.3) (Long-chain acyl-CoA synthetase 3) (LACS 3)                                                                                                                                                                                                                                                  | 80 kDa  | 0.46  | 117 | 65 | 53 | 21 | 19 | 17 | 8  | 16 | 9  | 16 | 12 | -<br>1.0908174<br>69 | 0%<br>(0.35) |
| ES1_HUMAN         | C9JFR7_HUMAN | CYCS    | C9JFR7 | Cytochrome c (Fragment)                                                                                                                                                                                                                                                                                                                       | 11 kDa  | 0.18  | 48  | 26 | 21 | 6  | 8  | 6  | 7  | 3  | 4  | 6  | 8  | -<br>1.0939178<br>59 | 0%<br>(0.43) |
| PCCA_HUMAN        | G3V203_HUMAN | RPL18   | G3V203 | 60S ribosomal protein L18                                                                                                                                                                                                                                                                                                                     | 19 kDa  | 0.11  | 47  | 26 | 21 | 7  | 4  | 5  | 10 | 6  | 7  | 3  | 5  | -<br>1.0939178<br>59 | 0%<br>(0.43) |
| Q30077_HUMAN (+1) | A8K4W2_HUMAN |         | A8K4W2 | cDNA FLJ78635, highly similar to Homo sapiens ATP synthase, H+ transporting, mitochondrial F0 complex, subunit b, isoform 1 (ATPSF1), transcript variant 1, mRNA                                                                                                                                                                              | 29 kDa  | 0.25  | 137 | 75 | 61 | 27 | 12 | 8  | 28 | 13 | 17 | 15 | 16 | -<br>1.0941384<br>15 | 0%<br>(0.33) |
| E9PKP7_HUMAN      | J3KTE4_HUMAN | RPL19   | J3KTE4 | Ribosomal protein L19                                                                                                                                                                                                                                                                                                                         | 23 kDa  | 0.11  | 27  | 15 | 12 | 3  | 4  | 4  | 5  | 2  | 3  | 3  | 4  | -<br>1.0954197<br>14 | 0%<br>(0.47) |
| MMS19_HUMAN       | AL4A1_HUMAN  | ALDH4A1 | P30038 | Delta-1-pyrroline-5-carboxylate dehydrogenase, mitochondrial (P5C dehydrogenase) (EC 1.2.1.88) (Aldehyde dehydrogenase family 4 member A1) (L-glutamate gamma-semialdehyde dehydrogenase)                                                                                                                                                     | 62 kDa  | 0.088 | 27  | 15 | 12 | 2  | 7  | 5  | 1  | 6  | 0  | 1  | 5  | -<br>1.0954197<br>14 | 0%<br>(0.47) |
| INADL_HUMAN       | B2R7B5_HUMAN |         | B2R7B5 | cDNA, FLJ93365, highly similar to Homo sapiens KH domain containing, RNA binding, signal transduction associated 1 (KHDRBS1), mRNA                                                                                                                                                                                                            | 48 kDa  | 0.042 | 27  | 15 | 12 | 3  | 4  | 4  | 4  | 3  | 1  | 6  | 2  | -<br>1.0954197<br>14 | 0%<br>(0.47) |
| B2R858_HUMAN (+1) | CY24B_HUMAN  | CYBB    | P04839 | Cytochrome b-245 heavy chain (EC 1.-.-.-) (CGD91-phox) (Cytochrome b558 subunit beta) (Cytochrome b558 subunit beta) (Heme-binding membrane glycoprotein gp91phox) (NADPH oxidase 2) (Neutrophil cytochrome b 91 kDa polypeptide) (Superoxide-generating NADPH oxidase heavy chain subunit) (gp91-1) (gp91-phox) (p22 phagocyte B-cytochrome) | 65 kDa  | 0.07  | 125 | 69 | 56 | 15 | 27 | 18 | 10 | 0  | 19 | 17 | 21 | -<br>1.0960752<br>32 | 0%<br>(0.34) |
| B2R4Q7_HUMAN (+2) | RL7A_HUMAN   | RPL7A   | P62424 | 60S ribosomal protein L7a (PLA-X polypeptide) (Surfeit locus protein 3)                                                                                                                                                                                                                                                                       | 30 kDa  | 0.24  | 103 | 58 | 47 | 16 | 14 | 14 | 16 | 11 | 12 | 8  | 15 | -<br>1.0968706<br>15 | 0%<br>(0.35) |
| B2R9T9_HUMAN (+1) | COPB_HUMAN   | COPB1   | P53618 | Coatamer subunit beta (Beta-coat protein) (Beta-COP)                                                                                                                                                                                                                                                                                          | 107 kDa | 0.091 | 104 | 58 | 47 | 10 | 12 | 18 | 18 | 9  | 22 | 12 | 4  | -<br>1.0968706<br>15 | 0%<br>(0.35) |
| SMD2_HUMAN        | PSD11_HUMAN  | PSMD11  | O00231 | 26S proteasome non-ATPase regulatory subunit 11 (26S proteasome regulatory subunit RPN6) (26S proteasome regulatory subunit S9) (26S proteasome regulatory subunit p4.5)                                                                                                                                                                      | 47 kDa  | 0.33  | 56  | 31 | 25 | 3  | 8  | 8  | 12 | 5  | 11 | 4  | 6  | -<br>1.0973661<br>13 | 0%<br>(0.41) |
| CAZA2_HUMAN (+1)  | GNA13_HUMAN  | GNA13   | Q14344 | Guanine nucleotide-binding protein subunit alpha-13 (G alpha-13) (G-protein subunit alpha-13)                                                                                                                                                                                                                                                 | 44 kDa  | 0.14  | 55  | 31 | 25 | 8  | 6  | 10 | 7  | 3  | 3  | 10 | 9  | -<br>1.0973661<br>13 | 0%<br>(0.41) |
| AP1M1_HUMAN (+3)  | RS25_HUMAN   | RPS25   | P62851 | 40S ribosomal protein S25                                                                                                                                                                                                                                                                                                                     | 14 kDa  | 0.11  | 36  | 20 | 16 | 3  | 4  | 6  | 7  | 4  | 5  | 3  | 4  | -<br>1.1003119<br>05 | 0%<br>(0.44) |

|                   |              |         |        |                                                                                                                                                                                                     |         |       |     |    |    |    |    |    |    |    |    |    |    |             |           |
|-------------------|--------------|---------|--------|-----------------------------------------------------------------------------------------------------------------------------------------------------------------------------------------------------|---------|-------|-----|----|----|----|----|----|----|----|----|----|----|-------------|-----------|
| LBR_HUMAN         | B4DN31_HUMAN |         | B4DN31 | cDNA FLJ55809                                                                                                                                                                                       | 51 kDa  | 0.057 | 36  | 20 | 16 | 5  | 6  | 5  | 4  | 4  | 2  | 3  | 7  | -           | 0%        |
|                   |              |         |        |                                                                                                                                                                                                     |         |       |     |    |    |    |    |    |    |    |    |    |    | 1.100311905 | 0% (0.44) |
| IMP3_HUMAN        | H0YHS6_HUMAN | YARS2   | H0YHS6 | Tyrosine-tRNA ligase, mitochondrial (Fragment)                                                                                                                                                      | 32 kDa  | 0.34  | 74  | 41 | 33 | 14 | 12 | 7  | 8  | 10 | 4  | 6  | 13 | -           | 0%        |
|                   |              |         |        |                                                                                                                                                                                                     |         |       |     |    |    |    |    |    |    |    |    |    |    | 1.101851574 | 0% (0.38) |
| A8K8A4_HUMAN (+2) | ODO1_HUMAN   | OGDH    | Q02218 | 2-oxoglutarate dehydrogenase, mitochondrial (EC 1.2.4.2) (2-oxoglutarate dehydrogenase complex component E1) (OGDC-E1) (Alpha-ketoglutarate dehydrogenase)                                          | 116 kDa | 0.11  | 179 | 99 | 80 | 37 | 27 | 19 | 17 | 27 | 10 | 23 | 21 | -           | 0%        |
|                   |              |         |        |                                                                                                                                                                                                     |         |       |     |    |    |    |    |    |    |    |    |    |    | 1.102168598 | 0% (0.29) |
| PP1R7_HUMAN       | UTRO_HUMAN   | UTRN    | P46939 | Utrophin (Dystrophin-related protein 1) (DRP-1)                                                                                                                                                     | 394 kDa | 0.081 | 7   | 4  | 3  | 1  | 2  | 0  | 1  | 1  | 0  | 2  | 0  | -           | 0%        |
|                   |              |         |        |                                                                                                                                                                                                     |         |       |     |    |    |    |    |    |    |    |    |    |    | 1.103337259 | 0% (0.56) |
| A7YA96_HUMAN (+1) | PAR14_HUMAN  | PARP14  | Q460N5 | Poly [ADP-ribose] polymerase 14 (PARP-14) (EC 2.4.2.30) (ADP-ribosyltransferase diphtheria toxin-like 8) (ARTD8) (B aggressive lymphoma protein 2)                                                  | 203 kDa | 0.067 | 7   | 4  | 3  | 0  | 0  | 0  | 4  | 3  | 0  | 0  | 0  | -           | 0%        |
|                   |              |         |        |                                                                                                                                                                                                     |         |       |     |    |    |    |    |    |    |    |    |    |    | 1.103337259 | 0% (0.56) |
| PRKRA_HUMAN       | E7EQN5_HUMAN | ARHGAP4 | E7EQN5 | Rho GTPase-activating protein 4                                                                                                                                                                     | 103 kDa | 0.073 | 7   | 4  | 3  | 0  | 0  | 0  | 4  | 2  | 0  | 0  | 1  | -           | 0%        |
|                   |              |         |        |                                                                                                                                                                                                     |         |       |     |    |    |    |    |    |    |    |    |    |    | 1.103337259 | 0% (0.56) |
| PDC10_HUMAN       | C9JC84_HUMAN | FGG     | C9JC84 | Fibrinogen gamma chain                                                                                                                                                                              | 52 kDa  | 0.17  | 7   | 4  | 3  | 1  | 0  | 0  | 3  | 0  | 0  | 0  | 3  | -           | 0%        |
|                   |              |         |        |                                                                                                                                                                                                     |         |       |     |    |    |    |    |    |    |    |    |    |    | 1.103337259 | 0% (0.56) |
| CY24A_HUMAN       | DTX3L_HUMAN  | DTX3L   | Q8TDB6 | E3 ubiquitin-protein ligase DTX3L (EC 6.3.2.-) (B-lymphoma- and BAL-associated protein) (Protein deltex-3-like) (Rhysin-2) (Rhysin2)                                                                | 84 kDa  | 0.11  | 7   | 4  | 3  | 0  | 1  | 1  | 2  | 2  | 1  | 0  | 0  | -           | 0%        |
|                   |              |         |        |                                                                                                                                                                                                     |         |       |     |    |    |    |    |    |    |    |    |    |    | 1.103337259 | 0% (0.56) |
| GRB7_HUMAN        | A2A2G4_HUMAN | ALG6    | A2A2G4 | Dolichyl pyrophosphate Man9GlcNAc2 alpha-1,3-glucosyltransferase                                                                                                                                    | 58 kDa  | 0.083 | 7   | 4  | 3  | 2  | 2  | 0  | 0  | 0  | 1  | 2  | 0  | -           | 0%        |
|                   |              |         |        |                                                                                                                                                                                                     |         |       |     |    |    |    |    |    |    |    |    |    |    | 1.103337259 | 0% (0.56) |
| B3KQN7_HUMAN (+2) | OGT1_HUMAN   | OGT     | O15294 | UDP-N-acetylglucosamine-peptide N-acetylglucosaminyltransferase 110 kDa subunit (EC 2.4.1.255) (O-GlcNAc transferase subunit p110) (O-linked N-acetylglucosamine transferase 110 kDa subunit) (OGT) | 117 kDa | 0.035 | 7   | 4  | 3  | 0  | 2  | 2  | 0  | 0  | 1  | 2  | 0  | -           | 0%        |
|                   |              |         |        |                                                                                                                                                                                                     |         |       |     |    |    |    |    |    |    |    |    |    |    | 1.103337259 | 0% (0.56) |
| B4E1K0_HUMAN (+2) | PDE12_HUMAN  | PDE12   | Q6L8Q7 | 2',5'-phosphodiesterase 12 (2'-PDE) (2-PDE) (EC 3.1.4.-) (Mitochondrial deadenylase) (EC 3.1.13.4)                                                                                                  | 67 kDa  | 0.036 | 7   | 4  | 3  | 2  | 0  | 1  | 1  | 1  | 2  | 0  | 0  | -           | 0%        |
|                   |              |         |        |                                                                                                                                                                                                     |         |       |     |    |    |    |    |    |    |    |    |    |    | 1.103337259 | 0% (0.56) |
| S10AE_HUMAN       | PIGO_HUMAN   | PIGO    | Q8TEQ8 | GPI ethanolamine phosphate transferase 3 (EC 2.-.-.) (Phosphatidylinositol-glycan biosynthesis class O protein) (PIG-O)                                                                             | 119 kDa | 0.25  | 7   | 4  | 3  | 1  | 2  | 0  | 1  | 2  | 1  | 1  | 0  | -           | 0%        |
|                   |              |         |        |                                                                                                                                                                                                     |         |       |     |    |    |    |    |    |    |    |    |    |    | 1.103337259 | 0% (0.56) |
| B4DG22_HUMAN (+4) | POF1B_HUMAN  | POF1B   | Q8WVV4 | Protein POF1B (Premature ovarian failure protein 1B)                                                                                                                                                | 68 kDa  | 0.083 | 7   | 4  | 3  | 4  | 0  | 0  | 0  | 0  | 3  | 0  | 0  | -           | 0%        |
|                   |              |         |        |                                                                                                                                                                                                     |         |       |     |    |    |    |    |    |    |    |    |    |    | 1.103337259 | 0% (0.56) |
| B4DY16_HUMAN (+2) | B7ZKY2_HUMAN | CASK    | B7ZKY2 | Calcium/calmodulin-dependent serine protein kinase (MAGUK family)                                                                                                                                   | 102 kDa | 0.13  | 7   | 4  | 3  | 0  | 2  | 2  | 0  | 1  | 0  | 1  | 1  | -           | 0%        |
|                   |              |         |        |                                                                                                                                                                                                     |         |       |     |    |    |    |    |    |    |    |    |    |    | 1.103337259 | 0% (0.56) |
| DAZP1_HUMAN       | A8K5R6_HUMAN |         | A8K5R6 | Golgi SNAP receptor complex member 1                                                                                                                                                                | 29 kDa  | 0.12  | 7   | 4  | 3  | 3  | 0  | 0  | 1  | 0  | 2  | 0  | 1  | -           | 0%        |
|                   |              |         |        |                                                                                                                                                                                                     |         |       |     |    |    |    |    |    |    |    |    |    |    | 1.103337259 | 0% (0.56) |
| B7Z4K8_HUMAN (+2) | B3KQ71_HUMAN |         | B3KQ71 | cDNA FLJ32982 fis, clone THYMU100002, highly similar to Golgi phosphoprotein 3                                                                                                                      | 32 kDa  | 0.089 | 7   | 4  | 3  | 0  | 1  | 2  | 1  | 0  | 0  | 2  | 1  | -           | 0%        |
|                   |              |         |        |                                                                                                                                                                                                     |         |       |     |    |    |    |    |    |    |    |    |    |    | 1.103337259 | 0% (0.56) |
| D7RF68_HUMAN      | SPX2_HUMAN   | SLC37A2 | Q8TED4 | Sugar phosphate exchanger 2 (Solute carrier family 37 member 2)                                                                                                                                     | 54 kDa  | 0.055 | 7   | 4  | 3  | 1  | 2  | 1  | 0  | 0  | 0  | 2  | 1  | -           | 0%        |
|                   |              |         |        |                                                                                                                                                                                                     |         |       |     |    |    |    |    |    |    |    |    |    |    | 1.103337259 | 0% (0.56) |
| E9PK47_HUMAN (+1) | D39U1_HUMAN  | SDR39U1 | Q9NRG7 | Epimerase family protein SDR39U1 (EC 1.1.1.-) (Short-chain dehydrogenase/reductase family 39U member 1)                                                                                             | 35 kDa  | 0.12  | 7   | 4  | 3  | 2  | 0  | 1  | 1  | 2  | 0  | 1  | 0  | -           | 0%        |
|                   |              |         |        |                                                                                                                                                                                                     |         |       |     |    |    |    |    |    |    |    |    |    |    | 1.103337259 | 0% (0.56) |
| CMPK2_HUMAN       | B7Z322_HUMAN |         | B7Z322 | cDNA FLJ52146, highly similar to Grancalcin                                                                                                                                                         | 22 kDa  | 0.2   | 7   | 4  | 3  | 0  | 1  | 2  | 1  | 0  | 3  | 0  | 0  | -           | 0%        |
|                   |              |         |        |                                                                                                                                                                                                     |         |       |     |    |    |    |    |    |    |    |    |    |    | 1.103337259 | 0% (0.56) |

|                   |              |          |        |                                                                                                                                                                                            |        |       |     |    |    |    |    |    |    |    |    |    |    |   |             |           |
|-------------------|--------------|----------|--------|--------------------------------------------------------------------------------------------------------------------------------------------------------------------------------------------|--------|-------|-----|----|----|----|----|----|----|----|----|----|----|---|-------------|-----------|
| B4DKU3_HUMAN (+1) | F8WAB8_HUMAN | SLC25A26 | F8WAB8 | S-adenosylmethionine mitochondrial carrier protein                                                                                                                                         | 29 kDa | 0.076 | 7   | 4  | 3  | 2  | 0  | 0  | 2  | 1  | 1  | 0  | 1  | - | 1.103337259 | 0% (0.56) |
| RL35A_HUMAN       | F134A_HUMAN  | FAM134A  | Q8NC44 | Protein FAM134A                                                                                                                                                                            | 58 kDa | 0.26  | 7   | 4  | 3  | 3  | 0  | 0  | 1  | 1  | 1  | 1  | 0  | - | 1.103337259 | 0% (0.56) |
| B3KYA7_HUMAN      | LAR4B_HUMAN  | LARP4B   | Q92615 | La-related protein 4B (La ribonucleoprotein domain family member 4B) (La ribonucleoprotein domain family member 5) (La-related protein 5)                                                  | 81 kDa | 0.073 | 6   | 4  | 3  | 0  | 1  | 2  | 1  | 1  | 1  | 1  | 0  | - | 1.103337259 | 0% (0.56) |
| KC1A_HUMAN        | SRP09_HUMAN  | SRP9     | P49458 | Signal recognition particle 9 kDa protein (SRP9)                                                                                                                                           | 10 kDa | 0.1   | 7   | 4  | 3  | 0  | 0  | 0  | 4  | 0  | 1  | 2  | 0  | - | 1.103337259 | 0% (0.56) |
| MYO1E_HUMAN       | ANO10_HUMAN  | ANO10    | Q9NW15 | Anoctamin-10 (Transmembrane protein 16K)                                                                                                                                                   | 76 kDa | 0.09  | 7   | 4  | 3  | 2  | 1  | 1  | 0  | 0  | 2  | 1  | 0  | - | 1.103337259 | 0% (0.56) |
| B4DIY7_HUMAN      | J3QK90_HUMAN | NSFL1C   | J3QK90 | NSFL1 cofactor p47                                                                                                                                                                         | 41 kDa | 0.097 | 7   | 4  | 3  | 0  | 2  | 2  | 0  | 0  | 1  | 0  | 2  | - | 1.103337259 | 0% (0.56) |
| TTL12_HUMAN       | B4DRA5_HUMAN |          | B4DRA5 | cDNA FLJ61346, highly similar to Protein transport protein Sec23B                                                                                                                          | 84 kDa | 0.056 | 45  | 25 | 20 | 4  | 4  | 8  | 9  | 4  | 8  | 4  | 4  | - | 1.103365149 | 0% (0.42) |
| THMS2_HUMAN       | ATP5L_HUMAN  | ATP5L    | O75964 | ATP synthase subunit g, mitochondrial (ATPase subunit g)                                                                                                                                   | 11 kDa | 0.096 | 45  | 25 | 20 | 5  | 8  | 5  | 7  | 4  | 5  | 5  | 6  | - | 1.103365149 | 0% (0.42) |
| Q59E99_HUMAN (+1) | F5GWP8_HUMAN | JUP      | F5GWP8 | Junction plakoglobin                                                                                                                                                                       | 66 kDa | 0.042 | 159 | 88 | 71 | 41 | 11 | 20 | 0  | 18 | 0  | 17 | 22 | - | 1.103448909 | 0% (0.30) |
| AT2B1_HUMAN       | B4DP27_HUMAN |          | B4DP27 | cDNA FLJ52153, highly similar to Transmembrane emp24 domain-containing protein 2                                                                                                           | 19 kDa | 0.093 | 54  | 30 | 24 | 10 | 6  | 4  | 10 | 6  | 6  | 5  | 7  | - | 1.105453401 | 0% (0.40) |
| A8K2X4_HUMAN (+3) | 6PGD_HUMAN   | PGD      | P52209 | 6-phosphogluconate dehydrogenase, decarboxylating (EC 1.1.1.44)                                                                                                                            | 53 kDa | 0.09  | 54  | 30 | 24 | 2  | 9  | 10 | 9  | 3  | 9  | 4  | 8  | - | 1.105453401 | 0% (0.40) |
| SPB9_HUMAN        | LRC59_HUMAN  | LRRC59   | Q96AG4 | Leucine-rich repeat-containing protein 59 (Ribosome-binding protein p34) (p34)                                                                                                             | 35 kDa | 0.22  | 157 | 87 | 70 | 24 | 24 | 20 | 20 | 16 | 16 | 20 | 18 | - | 1.106400514 | 0% (0.29) |
| TLR2_HUMAN        | SYDC_HUMAN   | DARS     | P14868 | Aspartate--tRNA ligase, cytoplasmic (EC 6.1.1.12) (Aspartyl-tRNA synthetase) (AspRS) (Cell proliferation-inducing gene 40 protein)                                                         | 57 kDa | 0.098 | 63  | 35 | 28 | 2  | 10 | 12 | 12 | 9  | 17 | 4  | 0  | - | 1.106972556 | 0% (0.39) |
| A6GV77_HUMAN (+1) | Q6FHK9_HUMAN | PSME2    | Q6FHK9 | PSME2 protein                                                                                                                                                                              | 27 kDa | 0.088 | 63  | 35 | 28 | 2  | 11 | 9  | 13 | 5  | 11 | 9  | 3  | - | 1.106972556 | 0% (0.39) |
| CPSF3_HUMAN (+2)  | ODPA_HUMAN   | PDHA1    | P08559 | Pyruvate dehydrogenase E1 component subunit alpha, somatic form, mitochondrial (EC 1.2.4.1) (PDHE1-A type I)                                                                               | 43 kDa | 0.079 | 73  | 40 | 32 | 8  | 10 | 11 | 11 | 14 | 6  | 7  | 7  | - | 1.108128002 | 0% (0.37) |
| SMCA1_HUMAN       | A8K1D2_HUMAN |          | A8K1D2 | cDNA FLJ76601, highly similar to Homo sapiens LIM and SH3 protein 1 (LASP1), mRNA                                                                                                          | 30 kDa | 0.099 | 16  | 9  | 7  | 1  | 3  | 4  | 1  | 3  | 3  | 0  | 1  | - | 1.109713166 | 0% (0.50) |
| SC5A3_HUMAN       | LRC47_HUMAN  | LRRC47   | Q8N1G4 | Leucine-rich repeat-containing protein 47                                                                                                                                                  | 63 kDa | 0.081 | 16  | 9  | 7  | 0  | 1  | 2  | 6  | 2  | 5  | 0  | 0  | - | 1.109713166 | 0% (0.50) |
| Q86YH3_HUMAN      | WDR61_HUMAN  | WDR61    | Q9GZS3 | WD repeat-containing protein 61 (Meiotic recombination REC14 protein homolog) (SKI8 homolog) (Ski8)                                                                                        | 34 kDa | 0.075 | 16  | 9  | 7  | 0  | 3  | 3  | 3  | 2  | 5  | 0  | 0  | - | 1.109713166 | 0% (0.50) |
| TRIPC_HUMAN       | SPTC2_HUMAN  | SPTLC2   | O15270 | Serine palmitoyltransferase 2 (EC 2.3.1.50) (Long chain base biosynthesis protein 2) (LCB2) (Long chain base biosynthesis protein 2a) (LCB2a) (Serine-palmitoyl-CoA transferase 2) (SPT 2) | 63 kDa | 0.019 | 16  | 9  | 7  | 4  | 3  | 0  | 2  | 2  | 0  | 4  | 1  | - | 1.109713166 | 0% (0.50) |
| CDCP1_HUMAN       | IMP3_HUMAN   | IMP3     | Q9NV31 | U3 small nucleolar ribonucleoprotein protein IMP3 (U3 snoRNP protein IMP3) (BRMS2)                                                                                                         | 22 kDa | 0.1   | 16  | 9  | 7  | 1  | 1  | 2  | 5  | 0  | 2  | 2  | 3  | - | 1.109713166 | 0% (0.50) |
| C9J837_HUMAN (+2) | RS23_HUMAN   | RPS23    | P62266 | 40S ribosomal protein S23                                                                                                                                                                  | 16 kDa | 0.066 | 16  | 9  | 7  | 2  | 2  | 2  | 3  | 2  | 2  | 1  | 2  | - | 1.109713166 | 0% (0.50) |

|                   |              |         |        |                                                                                                                                                                                                                                                                                                                         |         |       |     |    |    |    |    |    |    |   |    |    |    |   |             |           |
|-------------------|--------------|---------|--------|-------------------------------------------------------------------------------------------------------------------------------------------------------------------------------------------------------------------------------------------------------------------------------------------------------------------------|---------|-------|-----|----|----|----|----|----|----|---|----|----|----|---|-------------|-----------|
| J3QRN6_HUMAN (+1) | IQGA2_HUMAN  | IQGAP2  | Q13576 | Ras GTPase-activating-like protein IQGAP2                                                                                                                                                                                                                                                                               | 181 kDa | 0.085 | 15  | 9  | 7  | 1  | 3  | 5  | 0  | 0 | 2  | 4  | 0  | - | 1.109713166 | 0% (0.50) |
| A4QN18_HUMAN (+3) | D3DNA1_HUMAN | ITGB5   | D3DNA1 | Integrin beta                                                                                                                                                                                                                                                                                                           | 77 kDa  | 0.017 | 16  | 9  | 7  | 2  | 4  | 2  | 1  | 0 | 0  | 4  | 0  | - | 1.109713166 | 0% (0.50) |
| Q4LE60_HUMAN      | B3KTM6_HUMAN | RPL5    | B3KTM6 | Ribosomal protein L5, isoform CRA_b (cDNA FLJ38496 fis, clone FELIV1000137, highly similar to 60S RIBOSOMAL PROTEIN L5)                                                                                                                                                                                                 | 28 kDa  | 0.074 | 126 | 70 | 56 | 14 | 19 | 14 | 23 | 9 | 19 | 17 | 11 | - | 1.111692022 | 0% (0.31) |
| AN32E_HUMAN (+1)  | A8K9T8_HUMAN |         | A8K9T8 | cDNA FLJ76106, highly similar to Homo sapiens neurolysin (metallopeptidase M3 family) (NLN), mRNA                                                                                                                                                                                                                       | 81 kDa  | 0.17  | 24  | 14 | 11 | 4  | 2  | 5  | 3  | 4 | 0  | 2  | 5  | - | 1.111930103 | 0% (0.46) |
| CYBP_HUMAN (+1)   | B3GQE6_HUMAN | DDX27   | B3GQE6 | DEAD box polypeptide 27                                                                                                                                                                                                                                                                                                 | 87 kDa  | 0.13  | 25  | 14 | 11 | 3  | 5  | 3  | 3  | 5 | 0  | 1  | 5  | - | 1.111930103 | 0% (0.46) |
| B3KRR1_HUMAN (+2) | ABCF1_HUMAN  | ABCF1   | Q8NE71 | ATP-binding cassette sub-family F member 1 (ATP-binding cassette 50) (TNF-alpha-stimulated ABC protein)                                                                                                                                                                                                                 | 96 kDa  | 0.071 | 25  | 14 | 11 | 1  | 5  | 3  | 5  | 3 | 2  | 5  | 1  | - | 1.111930103 | 0% (0.46) |
| Q3B7X1_HUMAN (+1) | Q9HBK7_HUMAN | RHBDL7  | Q9HBK7 | NPD007                                                                                                                                                                                                                                                                                                                  | 47 kDa  | 0.11  | 25  | 14 | 11 | 4  | 5  | 3  | 3  | 1 | 3  | 3  | 4  | - | 1.111930103 | 0% (0.46) |
| H0Y858_HUMAN      | Q3KQZ2_HUMAN | SYNGR2  | Q3KQZ2 | Synaptogyrin                                                                                                                                                                                                                                                                                                            | 30 kDa  | 0.02  | 25  | 14 | 11 | 4  | 3  | 4  | 3  | 0 | 3  | 3  | 5  | - | 1.111930103 | 0% (0.46) |
| RDH10_HUMAN       | RTCB_HUMAN   | RTCB    | Q9Y310 | tRNA-splicing ligase RtcB homolog (EC 6.5.1.3)                                                                                                                                                                                                                                                                          | 55 kDa  | 0.31  | 34  | 19 | 15 | 4  | 5  | 4  | 6  | 4 | 7  | 3  | 2  | - | 1.11305931  | 0% (0.43) |
| FADS2_HUMAN       | PARP9_HUMAN  | PARP9   | Q8IXQ6 | Poly [ADP-ribose] polymerase 9 (PARP-9) (EC 2.4.2.30) (ADP-ribosyltransferase diphtheria toxin-like 9) (ARTD9) (B aggressive lymphoma protein)                                                                                                                                                                          | 96 kDa  | 0.14  | 34  | 19 | 15 | 4  | 5  | 4  | 6  | 4 | 5  | 3  | 3  | - | 1.11305931  | 0% (0.43) |
| B4DL39_HUMAN (+2) | COR1B_HUMAN  | CORO1B  | Q9BR76 | Coronin-1B (Coronin-2)                                                                                                                                                                                                                                                                                                  | 54 kDa  | 0.063 | 34  | 19 | 15 | 3  | 5  | 7  | 4  | 1 | 9  | 2  | 3  | - | 1.11305931  | 0% (0.43) |
| CIB1_HUMAN        | HEXB_HUMAN   | HEXB    | P07686 | Beta-hexosaminidase subunit beta (EC 3.2.1.52) (Beta-N-acetylhexosaminidase subunit beta) (Hexosaminidase subunit B) (Cervical cancer proto-oncogene 7 protein) (HCC-7) (N-acetyl-beta-glucosaminidase subunit beta) [Cleaved into: Beta-hexosaminidase subunit beta chain B; Beta-hexosaminidase subunit beta chain A] | 63 kDa  | 0.37  | 42  | 24 | 19 | 5  | 8  | 7  | 4  | 1 | 2  | 6  | 11 | - | 1.113745368 | 0% (0.41) |
| MTOR_HUMAN        | Q6NZ55_HUMAN | RPL13   | Q6NZ55 | 60S ribosomal protein L13                                                                                                                                                                                                                                                                                               | 24 kDa  | 0.01  | 43  | 24 | 19 | 7  | 4  | 7  | 6  | 5 | 6  | 4  | 4  | - | 1.113745368 | 0% (0.41) |
| B4DH53_HUMAN      | MDHC_HUMAN   | MDH1    | P40925 | Malate dehydrogenase, cytoplasmic (EC 1.1.1.37) (Cytosolic malate dehydrogenase) (Diiodophenylpyruvate reductase) (EC 1.1.1.96)                                                                                                                                                                                         | 36 kDa  | 0.06  | 43  | 24 | 19 | 1  | 6  | 6  | 11 | 8 | 2  | 5  | 4  | - | 1.113745368 | 0% (0.41) |
| B4DF41_HUMAN (+2) | PABP2_HUMAN  | PABPN1  | Q86U42 | Polyadenylate-binding protein 2 (PABP-2) (Poly(A)-binding protein 2) (Nuclear poly(A)-binding protein 1) (Poly(A)-binding protein 1) (PAB1) (Polyadenylate-binding nuclear protein 1)                                                                                                                                   | 33 kDa  | 0.085 | 43  | 24 | 19 | 5  | 8  | 6  | 5  | 6 | 3  | 6  | 4  | - | 1.113745368 | 0% (0.41) |
| A8K7T0_HUMAN (+1) | H3BV16_HUMAN | NDUFB10 | H3BV16 | NADH dehydrogenase [ubiquinone] 1 beta subcomplex subunit 10 (Fragment)                                                                                                                                                                                                                                                 | 17 kDa  | 0.14  | 42  | 24 | 19 | 8  | 4  | 4  | 8  | 5 | 3  | 5  | 7  | - | 1.113745368 | 0% (0.41) |
| PYRD_HUMAN        | B3KSH1_HUMAN | EIF3F   | B3KSH1 | Eukaryotic translation initiation factor 3 subunit F (eIF3) (Eukaryotic translation initiation factor 3 subunit 5) (eIF-3-epsilon) (eIF3 p47)                                                                                                                                                                           | 39 kDa  | 0.15  | 42  | 24 | 19 | 1  | 8  | 8  | 7  | 7 | 5  | 5  | 2  | - | 1.113745368 | 0% (0.41) |



|                   |              |         |        |                                                                                                                                                                                                                                                                                                                                  |         |       |     |     |    |    |    |    |    |    |    |    |    |   |             |           |
|-------------------|--------------|---------|--------|----------------------------------------------------------------------------------------------------------------------------------------------------------------------------------------------------------------------------------------------------------------------------------------------------------------------------------|---------|-------|-----|-----|----|----|----|----|----|----|----|----|----|---|-------------|-----------|
| D6REA1_HUMAN      | PP1B_HUMAN   | PPP1CB  | P62140 | Serine/threonine-protein phosphatase PP1-beta catalytic subunit (PP-1B) (PPP1CD) (EC 3.1.3.16) (EC 3.1.3.53)                                                                                                                                                                                                                     | 37 kDa  | 0.083 | 98  | 54  | 43 | 9  | 14 | 11 | 20 | 11 | 9  | 13 | 11 | - | 1.115285464 | 0% (0.33) |
| NDUA5_HUMAN       | CTNA1_HUMAN  | CTNNA1  | P35221 | Catenin alpha-1 (Alpha E-catenin) (Cadherin-associated protein) (Renal carcinoma antigen NY-REN-13)                                                                                                                                                                                                                              | 100 kDa | 0.35  | 160 | 88  | 70 | 27 | 18 | 26 | 17 | 26 | 4  | 20 | 21 | - | 1.118952023 | 0% (0.27) |
| UK114_HUMAN       | A8K4Z4_HUMAN |         | A8K4Z4 | cDNA FLJ75549, highly similar to Homo sapiens ribosomal protein, large, P0 (RPLP0), transcript variant 1, mRNA                                                                                                                                                                                                                   | 34 kDa  | 0.31  | 139 | 78  | 62 | 16 | 19 | 18 | 25 | 19 | 16 | 12 | 14 | - | 1.119234318 | 0% (0.28) |
| HEBP1_HUMAN       | A8K916_HUMAN |         | A8K916 | cDNA FLJ78481, highly similar to Homo sapiens adaptor-related protein complex 2, beta 1 subunit, mRNA                                                                                                                                                                                                                            | 106 kDa | 0.25  | 96  | 53  | 42 | 16 | 15 | 12 | 10 | 14 | 5  | 16 | 8  | - | 1.120421238 | 0% (0.32) |
| SNX5_HUMAN        | UFL1_HUMAN   | UFL1    | O94874 | E3 UFM1-protein ligase 1 (EC 6.3.2.-) (LZAP-binding protein)                                                                                                                                                                                                                                                                     | 90 kDa  | 0.072 | 87  | 48  | 38 | 13 | 11 | 10 | 14 | 9  | 7  | 10 | 11 | - | 1.12080836  | 0% (0.33) |
| B3KSE0_HUMAN (+3) | PRDX1_HUMAN  | PRDX1   | Q06830 | Peroxisome oxidoreductin-1 (EC 1.1.1.15) (Natural killer cell-enhancing factor A) (NKEF-A) (Proliferation-associated gene protein) (PAG) (Thioredoxin peroxidase 2) (Thioredoxin-dependent peroxide reductase 2)                                                                                                                 | 22 kDa  | 0.12  | 182 | 102 | 81 | 14 | 30 | 37 | 22 | 22 | 28 | 17 | 14 | - | 1.121377098 | 0% (0.25) |
| B2R6P4_HUMAN (+1) | ABHDA_HUMAN  | ABHD10  | Q9NUJ1 | Mycophenolic acid acylglucuronide esterase, mitochondrial (EC 3.1.1.93) (Alpha/beta hydrolase domain-containing protein 10) (Abhydrolase domain-containing protein 10)                                                                                                                                                           | 34 kDa  | 0.14  | 68  | 38  | 30 | 9  | 11 | 8  | 10 | 12 | 5  | 5  | 8  | - | 1.121885669 | 0% (0.36) |
| NDUA4_HUMAN       | AT131_HUMAN  | ATP13A1 | Q9HD20 | Probable cation-transporting ATPase 13A1 (EC 3.6.3.-)                                                                                                                                                                                                                                                                            | 133 kDa | 0.27  | 68  | 38  | 30 | 19 | 4  | 4  | 11 | 4  | 8  | 10 | 8  | - | 1.121885669 | 0% (0.36) |
| QPCTL_HUMAN       | PGH1_HUMAN   | PTGS1   | P23219 | Prostaglandin G/H synthase 1 (EC 1.14.99.1) (Cyclooxygenase-1) (COX-1) (Prostaglandin H2 synthase 1) (PGH synthase 1) (PGHS-1) (PHS 1) (Prostaglandin-endoperoxide synthase 1)                                                                                                                                                   | 69 kDa  | 0.071 | 68  | 38  | 30 | 8  | 2  | 3  | 25 | 6  | 5  | 2  | 17 | - | 1.121885669 | 0% (0.36) |
| GNL1_HUMAN (+1)   | DJB11_HUMAN  | DNAJB11 | Q9UBS4 | DnaJ homolog subfamily B member 11 (APOBEC1-binding protein 2) (ABBP-2) (DnaJ protein homolog 9) (ER-associated DNAJ) (ER-associated Hsp40 co-chaperone) (Endoplasmic reticulum DNA J domain-containing protein 3) (ER-resident protein ERdj3) (ERdj3) (ERj3) (HEDJ) (Human DnaJ protein 9) (hDj-9) (PWPI-interacting protein 4) | 41 kDa  | 0.066 | 93  | 52  | 41 | 13 | 12 | 11 | 16 | 8  | 11 | 12 | 11 | - | 1.125800062 | 0% (0.32) |
| A8K885_HUMAN (+1) | OST48_HUMAN  | DDOST   | P39656 | Dolichyl-diphosphooligosaccharide--protein glycosyltransferase 48 kDa subunit (DDOST 48 kDa subunit) (Oligosaccharyl transferase 48 kDa subunit) (EC 2.4.99.18)                                                                                                                                                                  | 51 kDa  | 0.14  | 188 | 105 | 83 | 37 | 22 | 14 | 33 | 15 | 27 | 17 | 24 | - | 1.126576817 | 0% (0.23) |
| ABHEB_HUMAN (+2)  | B3KQB4_HUMAN |         | B3KQB4 | cDNA FLJ90131 fis, clone HEMBB1000447, highly similar to PRA1 family protein 3                                                                                                                                                                                                                                                   | 22 kDa  | 0.18  | 35  | 18  | 14 | 6  | 4  | 3  | 4  | 3  | 4  | 3  | 3  | - | 1.127478325 | 0% (0.42) |
| SPHM_HUMAN        | FAH2A_HUMAN  | FAHD2A  | Q96GK7 | Fumarylacetoacetate hydrolase domain-containing protein 2A (EC 3.-.-.-)                                                                                                                                                                                                                                                          | 35 kDa  | 0.068 | 32  | 18  | 14 | 4  | 4  | 10 | 0  | 5  | 5  | 3  | 1  | - | 1.127478325 | 0% (0.42) |
| FA98A_HUMAN (+1)  | PRS4_HUMAN   | PSMC1   | P62191 | 26S protease regulatory subunit 4 (P26s4) (26S proteasome AAA-ATPase subunit RPT2) (Proteasome 26S subunit ATPase 1)                                                                                                                                                                                                             | 49 kDa  | 0.096 | 32  | 18  | 14 | 0  | 5  | 6  | 7  | 1  | 9  | 4  | 0  | - | 1.127478325 | 0% (0.42) |

|                  |              |          |        |                                                                                                                                                                   |         |       |     |    |    |    |    |    |    |    |    |    |    |   |             |    |        |
|------------------|--------------|----------|--------|-------------------------------------------------------------------------------------------------------------------------------------------------------------------|---------|-------|-----|----|----|----|----|----|----|----|----|----|----|---|-------------|----|--------|
| MYO1G_HUMAN      | TNAP2_HUMAN  | TNFAIP2  | Q03169 | Tumor necrosis factor alpha-induced protein 2 (TNF alpha-induced protein 2) (Primary response gene B94 protein)                                                   | 73 kDa  | 0.06  | 32  | 18 | 14 | 1  | 5  | 8  | 4  | 1  | 8  | 4  | 1  | - | 1.127478325 | 0% | (0.42) |
| Q5HYL6_HUMAN     | RAB12_HUMAN  | RAB12    | Q6IQ22 | Ras-related protein Rab-12                                                                                                                                        | 27 kDa  | 0.2   | 32  | 18 | 14 | 4  | 5  | 4  | 0  | 0  | 0  | 4  | 4  | - | 1.127478325 | 0% | (0.42) |
| SIAS_HUMAN       | B2R7M1_HUMAN |          | B2R7M1 | cDNA, FLJ93507, highly similar to Homo sapiens ATPase, H+ transporting, lysosomal 38kDa, V0 subunit d isoform 1 (ATP6V0D1), mRNA                                  | 40 kDa  | 0.14  | 66  | 37 | 29 | 14 | 9  | 8  | 7  | 1  | 10 | 8  | 10 | - | 1.129446565 | 0% | (0.35) |
| PDIA5_HUMAN      | RASN_HUMAN   | NRAS     | P01111 | GTase NRas (Transforming protein N-Ras)                                                                                                                           | 21 kDa  | 0.062 | 23  | 13 | 10 | 1  | 6  | 3  | 3  | 5  | 1  | 4  | 1  | - | 1.131375428 | 0% | (0.45) |
| B2RTQ5_HUMAN(+2) | FCGRN_HUMAN  | FCGR1    | P55899 | IgG receptor FcRn large subunit p51 (FcRn) (IgG Fc fragment receptor transporter alpha chain) (Neonatal Fc receptor)                                              | 40 kDa  | 0.023 | 22  | 13 | 10 | 2  | 3  | 2  | 6  | 0  | 4  | 1  | 5  | - | 1.131375428 | 0% | (0.45) |
| TOR4A_HUMAN      | B4DLB8_HUMAN |          | B4DLB8 | cDNA FLJ52205, highly similar to Beta-1,4-galactosyltransferase 1 (EC 2.4.1.-)                                                                                    | 40 kDa  | 0.12  | 23  | 13 | 10 | 4  | 4  | 3  | 2  | 1  | 2  | 3  | 4  | - | 1.131375428 | 0% | (0.45) |
| CRKL_HUMAN       | GNA11_HUMAN  | GNA11    | P29992 | Guanine nucleotide-binding protein subunit alpha-11 (G alpha-11) (G-protein subunit alpha-11) (Guanine nucleotide-binding protein G(y) subunit alpha)             | 42 kDa  | 0.14  | 23  | 13 | 10 | 8  | 1  | 2  | 2  | 3  | 1  | 3  | 3  | - | 1.131375428 | 0% | (0.45) |
| A8K3W7_HUMAN(+1) | FUBP3_HUMAN  | FUBP3    | Q96124 | Far upstream element-binding protein 3 (FUSE-binding protein 3)                                                                                                   | 62 kDa  | 0.16  | 23  | 13 | 10 | 2  | 0  | 4  | 0  | 0  | 0  | 6  | 0  | - | 1.131375428 | 0% | (0.45) |
| A8K2Q7_HUMAN(+1) | B9EJA8_HUMAN | MRC1L1   | B9EJA8 | Mannose receptor, C type 1-like 1                                                                                                                                 | 166 kDa | 0.13  | 91  | 51 | 40 | 5  | 22 | 24 | 0  | 0  | 3  | 16 | 21 | - | 1.131439609 | 0% | (0.31) |
| Q53TD0_HUMAN(+1) | B2R6D7_HUMAN |          | B2R6D7 | cDNA, FLJ92904, highly similar to Homo sapiens casein kinase 2, alpha 1 polypeptide (CSNK2A1), mRNA                                                               | 45 kDa  | 0.043 | 81  | 46 | 36 | 5  | 13 | 11 | 16 | 10 | 8  | 6  | 12 | - | 1.13303065  | 0% | (0.32) |
| ACOT8_HUMAN(+1)  | Q59GY2_HUMAN |          | Q59GY2 | Ribosomal protein L4 variant (Fragment)                                                                                                                           | 49 kDa  | 0.078 | 165 | 93 | 73 | 26 | 24 | 22 | 22 | 18 | 17 | 26 | 13 | - | 1.133919388 | 0% | (0.24) |
| B3KQ18_HUMAN     | FXR1_HUMAN   | FXR1     | P51114 | Fragile X mental retardation syndrome-related protein 1 (hFXR1p)                                                                                                  | 70 kDa  | 0.049 | 64  | 36 | 28 | 6  | 9  | 11 | 10 | 9  | 8  | 6  | 5  | - | 1.137524351 | 0% | (0.34) |
| FMNL_HUMAN       | CS010_HUMAN  | C19orf10 | Q969H8 | UPF0556 protein C19orf10 (Interleukin-25) (IL-25) (Stromal cell-derived growth factor SF20)                                                                       | 19 kDa  | 0.049 | 39  | 22 | 17 | 6  | 5  | 5  | 6  | 2  | 3  | 3  | 9  | - | 1.137918051 | 0% | (0.39) |
| Q5VWC4_HUMAN     | B5MBZ0_HUMAN | EML4     | B5MBZ0 | Echinoderm microtubule-associated protein-like 4                                                                                                                  | 110 kDa | 0.092 | 15  | 8  | 6  | 1  | 2  | 3  | 2  | 3  | 1  | 2  | 1  | - | 1.139581041 | 0% | (0.48) |
| A8K935_HUMAN(+3) | RT25_HUMAN   | MRPS25   | P82663 | 28S ribosomal protein S25, mitochondrial (MRP-S25) (S25mt)                                                                                                        | 20 kDa  | 0.027 | 14  | 8  | 6  | 3  | 2  | 1  | 2  | 2  | 1  | 1  | 2  | - | 1.139581041 | 0% | (0.48) |
| A8K139_HUMAN(+3) | SC5A3_HUMAN  | SLC5A3   | P53794 | Sodium/myo-inositol cotransporter (Na(+)/myo-inositol cotransporter) (Sodium/myo-inositol transporter 1) (SMIT1) (Solute carrier family 5 member 3)               | 80 kDa  | 0.078 | 14  | 8  | 6  | 5  | 3  | 0  | 0  | 6  | 0  | 0  | 0  | - | 1.139581041 | 0% | (0.48) |
| TF3C3_HUMAN      | G3V1C3_HUMAN | API5     | G3V1C3 | Apoptosis inhibitor 5                                                                                                                                             | 58 kDa  | 0.068 | 14  | 8  | 6  | 0  | 2  | 1  | 5  | 0  | 0  | 6  | 0  | - | 1.139581041 | 0% | (0.48) |
| B9A018_HUMAN(+1) | LYSC_HUMAN   | LYZ      | P61626 | Lysozyme C (EC 3.2.1.17) (1,4-beta-N-acetylmuramidase C)                                                                                                          | 17 kDa  | 0.14  | 14  | 8  | 6  | 2  | 2  | 2  | 2  | 0  | 2  | 2  | 2  | - | 1.139581041 | 0% | (0.48) |
| A8K5B0_HUMAN(+1) | ENPP4_HUMAN  | ENPP4    | Q9Y6X5 | Bis(5'-adenosyl)-triphosphatase ENPP4 (EC 3.6.1.29) (AP3A hydrolase) (AP3Aase) (Ectonucleotide pyrophosphatase/phosphodiesterase family member 4) (ENPP4) (NPP-4) | 52 kDa  | 0.25  | 14  | 8  | 6  | 4  | 2  | 1  | 1  | 1  | 0  | 3  | 2  | - | 1.139581041 | 0% | (0.48) |
| ATAD2_HUMAN      | KRR1_HUMAN   | KRR1     | Q13601 | KRR1 small subunit processome component homolog (HIV-1 Rev-binding                                                                                                | 44 kDa  | 0.07  | 14  | 8  | 6  | 0  | 2  | 2  | 4  | 1  | 2  | 1  | 2  | - | 1.139581041 | 0% | (0.48) |

|                  |              |         |        |                                                                                                                                                                              |        |       |     |     |    |    |    |    |    |    |    |    |    |   |    |
|------------------|--------------|---------|--------|------------------------------------------------------------------------------------------------------------------------------------------------------------------------------|--------|-------|-----|-----|----|----|----|----|----|----|----|----|----|---|----|
|                  |              |         |        | protein 2) (KRR-R motif-containing protein 1) (Rev-interacting protein 1) (Rip-1)                                                                                            |        |       |     |     |    |    |    |    |    |    |    |    |    |   |    |
| NOL11_HUMAN      | B4DH46_HUMAN |         | B4DH46 | cDNA FLJ60519, highly similar to WD repeat protein 68                                                                                                                        | 19 kDa | 0.056 | 14  | 8   | 6  | 0  | 1  | 1  | 6  | 2  | 2  | 1  | 1  | - | 0% |
| RM21_HUMAN       | TM41A_HUMAN  | TMEM41A | Q96HV5 | Transmembrane protein 41A                                                                                                                                                    | 30 kDa | 0.14  | 14  | 8   | 6  | 3  | 1  | 1  | 2  | 1  | 1  | 2  | 2  | - | 0% |
| Q6FHJ5_HUMAN(+1) | B7Z418_HUMAN | ILK     | B7Z418 | Integrin-linked protein kinase (cDNA FLJ50979, moderately similar to Integrin-linked protein kinase (EC 2.7.11.1))                                                           | 44 kDa | 0.092 | 14  | 8   | 6  | 0  | 2  | 4  | 2  | 0  | 2  | 2  | 2  | - | 0% |
| F5GZD0_HUMAN     | A5PLM9_HUMAN | CTSL1   | A5PLM9 | Cathepsin L1                                                                                                                                                                 | 38 kDa | 0.056 | 14  | 8   | 6  | 0  | 3  | 3  | 2  | 0  | 3  | 2  | 1  | - | 0% |
| NCOA5_HUMAN      | ANX11_HUMAN  | ANXA11  | P50995 | Annexin A11 (56 kDa autoantigen) (Annexin XI) (Annexin-11) (Calyculin-associated annexin 50) (CAP-50)                                                                        | 54 kDa | 0.079 | 189 | 105 | 82 | 31 | 24 | 24 | 28 | 15 | 20 | 19 | 31 | - | 0% |
| LAP2_HUMAN(+1)   | RS3_HUMAN    | RPS3    | P23396 | 40S ribosomal protein S3                                                                                                                                                     | 27 kDa | 0.023 | 128 | 72  | 56 | 17 | 20 | 15 | 21 | 19 | 17 | 12 | 8  | - | 0% |
| G3VIC3_HUMAN     | NDUS1_HUMAN  | NDUFS1  | P28331 | NADH-ubiquinone oxidoreductase 75 kDa subunit, mitochondrial (EC 1.6.5.3) (EC 1.6.99.3) (Complex I-75kD) (CI-75kD)                                                           | 79 kDa | 0.17  | 127 | 72  | 56 | 28 | 20 | 14 | 10 | 18 | 5  | 15 | 17 | - | 0% |
| B2R6P1_HUMAN(+4) | S10A4_HUMAN  | S100A4  | P26447 | Protein S100-A4 (Calvасculin) (Metastasin) (Placental calcium-binding protein) (Protein Mts1) (S100 calcium-binding protein A4)                                              | 12 kDa | 0.067 | 30  | 17  | 13 | 6  | 2  | 4  | 5  | 3  | 4  | 2  | 4  | - | 0% |
| F8VSD4_HUMAN(+3) | B2RSV2_HUMAN |         | B2RSV2 | Succinyl-CoA:3-ketoacid-coenzyme A transferase (EC 2.8.3.5)                                                                                                                  | 56 kDa | 0.21  | 30  | 17  | 13 | 3  | 9  | 6  | 0  | 10 | 0  | 3  | 0  | - | 0% |
| G3XAB3_HUMAN(+1) | B4E2S7_HUMAN | LAMP2   | B4E2S7 | Lysosome-associated membrane glycoprotein 2 (cDNA FLJ58780, highly similar to Homo sapiens lysosomal-associated membrane protein 2 (LAMP2), transcript variant LAMP2B, mRNA) | 40 kDa | 0.031 | 30  | 17  | 13 | 5  | 6  | 3  | 3  | 1  | 2  | 5  | 5  | - | 0% |
| B8QFA1_HUMAN(+2) | Q96DV6_HUMAN | RPS6    | Q96DV6 | 40S ribosomal protein S6                                                                                                                                                     | 29 kDa | 0.053 | 46  | 26  | 20 | 7  | 7  | 7  | 5  | 7  | 5  | 6  | 2  | - | 0% |
| B7Z700_HUMAN(+1) | B2RAQ8_HUMAN |         | B2RAQ8 | cDNA, FLJ95058, highly similar to Homo sapiens carnitine palmitoyltransferase 1A (liver) (CPT1A), nuclear gene encoding mitochondrial protein, mRNA                          | 88 kDa | 0.063 | 133 | 75  | 58 | 22 | 16 | 17 | 20 | 15 | 9  | 20 | 14 | - | 0% |
| PLMN_HUMAN       | B3KNN7_HUMAN |         | B3KNN7 | cDNA FLJ30049 fis, clone ADRGL1000033, highly similar to 26S proteasome non-ATPase regulatory subunit 3                                                                      | 57 kDa | 0.075 | 85  | 48  | 37 | 2  | 13 | 15 | 18 | 7  | 21 | 5  | 5  | - | 0% |
| A8K984_HUMAN(+3) | A8K4H1_HUMAN |         | A8K4H1 | cDNA FLJ78268, highly similar to Homo sapiens fusion (involved in t(12;16) in malignant liposarcoma), transcript variant 1, mRNA                                             | 53 kDa | 0.036 | 70  | 39  | 30 | 11 | 14 | 10 | 4  | 8  | 3  | 7  | 13 | - | 0% |
| ESSL1_HUMAN      | RALA_HUMAN   | RALA    | P11233 | Ras-related protein Ral-A                                                                                                                                                    | 24 kDa | 0.14  | 69  | 39  | 30 | 13 | 13 | 6  | 7  | 6  | 9  | 6  | 9  | - | 0% |
| TIM14_HUMAN      | B2RD27_HUMAN |         | B2RD27 | cDNA, FLJ96428, highly similar to Homo sapiens proteasome (prosome, macropain) 26S subunit, non-ATPase, 7 (Mav34 homolog) (PSMD7), mRNA                                      | 37 kDa | 0.36  | 53  | 30  | 23 | 3  | 9  | 6  | 12 | 3  | 13 | 5  | 2  | - | 0% |
| ATAD1_HUMAN      | BZW1_HUMAN   | BZW1    | Q7LIQ6 | Basic leucine zipper and W2 domain-containing protein 1 (Protein Orf)                                                                                                        | 48 kDa | 0.1   | 37  | 21  | 16 | 1  | 8  | 9  | 3  | 3  | 8  | 5  | 1  | - | 0% |
| CKLF6_HUMAN      | PRS6B_HUMAN  | PSMC4   | P43686 | 26S protease regulatory subunit 6B (26S proteasome AAA-ATPase subunit RPT3)                                                                                                  | 47 kDa | 0.06  | 37  | 21  | 16 | 3  | 5  | 7  | 6  | 5  | 5  | 4  | 2  | - | 0% |

|                   |              |          |        |                                                                                                                                                                                                                                                                                                     |         |       |     |     |     |    |    |    |     |    |    |    |    |   |             |            |
|-------------------|--------------|----------|--------|-----------------------------------------------------------------------------------------------------------------------------------------------------------------------------------------------------------------------------------------------------------------------------------------------------|---------|-------|-----|-----|-----|----|----|----|-----|----|----|----|----|---|-------------|------------|
|                   |              |          |        | (MB67-interacting protein) (MIP224) (Proteasome 26S subunit ATPase 4) (Tat-binding protein 7) (TBP-7)                                                                                                                                                                                               |         |       |     |     |     |    |    |    |     |    |    |    |    |   |             |            |
| RS23_HUMAN        | A8KAQ5_HUMAN |          | A8KAQ5 | cDNA FLJ77404, highly similar to Homo sapiens small nuclear ribonucleoprotein 70kDa polypeptide (RNP antigen) (SNRP70), transcript variant 1, mRNA                                                                                                                                                  | 51 kDa  | 0.16  | 22  | 12  | 9   | 1  | 5  | 4  | 2   | 3  | 2  | 3  | 1  | - | 1.154614695 | 0% (0.44)  |
| NFU1_HUMAN        | CNOT1_HUMAN  | CNOT1    | A5YKK6 | CCR4-NOT transcription complex subunit 1 (CCR4-associated factor 1) (Negative regulator of transcription subunit 1 homolog) (NOT1H) (hNOT1)                                                                                                                                                         | 267 kDa | 0.15  | 21  | 12  | 9   | 1  | 5  | 6  | 0   | 3  | 2  | 3  | 1  | - | 1.154614695 | 0% (0.44)  |
| A2A3U5_HUMAN (+1) | PDXK_HUMAN   | PDXK     | O00764 | Pyridoxal kinase (EC 2.7.1.35) (Pyridoxine kinase)                                                                                                                                                                                                                                                  | 35 kDa  | 0.13  | 21  | 12  | 9   | 1  | 5  | 3  | 3   | 2  | 1  | 5  | 1  | - | 1.154614695 | 0% (0.44)  |
| H7BXZ6_HUMAN (+1) | COPZ1_HUMAN  | COPZ1    | P61923 | Coatamer subunit zeta-1 (Zeta-1-coat protein) (Zeta-1 COP)                                                                                                                                                                                                                                          | 20 kDa  | 0.07  | 21  | 12  | 9   | 0  | 4  | 6  | 2   | 0  | 6  | 1  | 2  | - | 1.154614695 | 0% (0.44)  |
| SNAG_HUMAN        | PM14_HUMAN   | SF3B14   | Q9Y3B4 | Pre-mRNA branch site protein p14 (SF3b 14 kDa subunit)                                                                                                                                                                                                                                              | 15 kDa  | 0.13  | 21  | 12  | 9   | 2  | 2  | 4  | 4   | 0  | 1  | 3  | 5  | - | 1.154614695 | 0% (0.44)  |
| ACAD8_HUMAN       | PEF1_HUMAN   | PEF1     | Q9UBV8 | Peflin (PEF protein with a long N-terminal hydrophobic domain) (Penta-EF hand domain-containing protein 1)                                                                                                                                                                                          | 30 kDa  | 0.13  | 21  | 12  | 9   | 4  | 3  | 2  | 3   | 2  | 3  | 2  | 2  | - | 1.154614695 | 0% (0.44)  |
| A8K588_HUMAN (+1) | USMG5_HUMAN  | USMG5    | Q96IX5 | Up-regulated during skeletal muscle growth protein 5 (Diabetes-associated protein in insulin-sensitive tissues) (HCV F-transactivated protein 2)                                                                                                                                                    | 6 kDa   | 0.12  | 21  | 12  | 9   | 3  | 2  | 2  | 5   | 2  | 2  | 2  | 3  | - | 1.154614695 | 0% (0.44)  |
| VATG1_HUMAN       | TMM43_HUMAN  | TMEM43   | Q9BTV4 | Transmembrane protein 43 (Protein LUMA)                                                                                                                                                                                                                                                             | 45 kDa  | 0.31  | 60  | 34  | 26  | 13 | 5  | 5  | 11  | 2  | 12 | 1  | 12 | - | 1.155458216 | 0% (0.33)  |
| DBLOH_HUMAN (+1)  | RAB5B_HUMAN  | RAB5B    | P61020 | Ras-related protein Rab-5B                                                                                                                                                                                                                                                                          | 24 kDa  | 0.14  | 61  | 34  | 26  | 9  | 9  | 9  | 8   | 5  | 8  | 5  | 8  | - | 1.155458216 | 0% (0.33)  |
| CSK2B_HUMAN (+2)  | AK1A1_HUMAN  | AKR1A1   | P14550 | Alcohol dehydrogenase [NADP(+)] (EC 1.1.1.2) (Aldehyde reductase) (Aldo-keto reductase family 1 member A1)                                                                                                                                                                                          | 37 kDa  | 0.14  | 46  | 25  | 19  | 4  | 4  | 4  | 13  | 2  | 6  | 3  | 7  | - | 1.157868977 | 0% (0.36)  |
| B0QYK0_HUMAN (+3) | RBBP4_HUMAN  | RBBP4    | Q09028 | Histone-binding protein RBBP4 (Chromatin assembly factor 1 subunit C) (CAF-1 subunit C) (Chromatin assembly factor I p48 subunit) (CAF-I 48 kDa subunit) (CAF-I p48) (Nucleosome-remodeling factor subunit RBAP48) (Retinoblastoma-binding protein 4) (RBBP-4) (Retinoblastoma-binding protein p48) | 48 kDa  | 0.047 | 44  | 25  | 19  | 7  | 7  | 7  | 4   | 4  | 1  | 9  | 5  | - | 1.157868977 | 0% (0.36)  |
| CDC73_HUMAN       | IDHP_HUMAN   | IDH2     | P48735 | Isocitrate dehydrogenase [NADP], mitochondrial (IDH) (EC 1.1.1.42) (ICD-M) (IDP) (NADP(+)-specific ICDH) (Oxalosuccinate decarboxylase)                                                                                                                                                             | 51 kDa  | 0.034 | 536 | 304 | 234 | 73 | 66 | 63 | 104 | 49 | 60 | 64 | 61 | - | 1.159566458 | 0% (0.052) |
| A8KA56_HUMAN (+2) | ALDH2_HUMAN  | ALDH2    | P05091 | Aldehyde dehydrogenase, mitochondrial (EC 1.2.1.3) (ALDH class 2) (ALDH-E2) (ALDH1)                                                                                                                                                                                                                 | 56 kDa  | 0.083 | 219 | 124 | 95  | 27 | 34 | 39 | 24  | 6  | 32 | 26 | 32 | - | 1.162545306 | 0% (0.15)  |
| B4DHNS_HUMAN (+3) | F120A_HUMAN  | FAM120A  | Q9NZB2 | Constitutive coactivator of PPAR-gamma-like protein 1 (Oxidative stress-associated Src activator) (Protein FAM120A)                                                                                                                                                                                 | 122 kDa | 0.14  | 28  | 16  | 12  | 4  | 6  | 5  | 1   | 2  | 3  | 4  | 3  | - | 1.162845101 | 0% (0.40)  |
| COASY_HUMAN       | MCAT_HUMAN   | SLC25A20 | O43772 | Mitochondrial carnitine/acylcarnitine carrier protein (Carnitine/acylcarnitine translocase) (CAC) (Solute carrier family 25 member 20)                                                                                                                                                              | 33 kDa  | 0.071 | 28  | 16  | 12  | 5  | 0  | 1  | 10  | 1  | 6  | 2  | 3  | - | 1.162845101 | 0% (0.40)  |

|                   |              |          |        |                                                                                                                                                                                                                             |         |       |     |    |    |    |    |    |    |    |    |    |    |   |             |    |        |
|-------------------|--------------|----------|--------|-----------------------------------------------------------------------------------------------------------------------------------------------------------------------------------------------------------------------------|---------|-------|-----|----|----|----|----|----|----|----|----|----|----|---|-------------|----|--------|
| B4DJK9_HUMAN (+1) | SYJ2B_HUMAN  | SYNJ2BP  | P57105 | Synaptotagmin-2-binding protein (Mitochondrial outer membrane protein 25)                                                                                                                                                   | 16 kDa  | 0.18  | 28  | 16 | 12 | 4  | 4  | 4  | 4  | 3  | 4  | 4  | 1  | - | 1.162845101 | 0% | (0.40) |
| B1AHD1_HUMAN (+1) | TLN1_HUMAN   | TLN1     | Q9Y490 | Talin-1                                                                                                                                                                                                                     | 270 kDa | 0.27  | 150 | 85 | 65 | 4  | 33 | 28 | 18 | 12 | 13 | 19 | 21 | - | 1.162989621 | 0% | (0.20) |
| GDPD3_HUMAN       | B4E380_HUMAN |          | B4E380 | Histone H3                                                                                                                                                                                                                  | 13 kDa  | 0.22  | 79  | 46 | 35 | 12 | 10 | 8  | 16 | 11 | 10 | 5  | 8  | - | 1.164303425 | 0% | (0.28) |
| RFC1_HUMAN        | J3KRX5_HUMAN | RPL17    | J3KRX5 | 60S ribosomal protein L17 (Fragment)                                                                                                                                                                                        | 20 kDa  | 0.02  | 81  | 46 | 35 | 12 | 12 | 9  | 14 | 10 | 6  | 8  | 11 | - | 1.164303425 | 0% | (0.28) |
| J3KMX1_HUMAN (+1) | HSDL2_HUMAN  | HSDL2    | Q6YN16 | Hydroxysteroid dehydrogenase-like protein 2 (EC 1.-.-.-)                                                                                                                                                                    | 45 kDa  | 0.039 | 57  | 33 | 25 | 8  | 12 | 5  | 8  | 11 | 5  | 2  | 6  | - | 1.165449784 | 0% | (0.32) |
| Q53EL1_HUMAN (+1) | K2013_HUMAN  | KIAA2013 | Q8IYS2 | Uncharacterized protein KIAA2013                                                                                                                                                                                            | 69 kDa  | 0.065 | 5   | 3  | 2  | 0  | 0  | 1  | 2  | 1  | 0  | 0  | 1  | - | 1.168003509 | 0% | (0.55) |
| B4DQJ1_HUMAN (+1) | VPS18_HUMAN  | VPS18    | Q9P253 | Vacuolar protein sorting-associated protein 18 homolog (hVPS18)                                                                                                                                                             | 110 kDa | 0.078 | 5   | 3  | 2  | 1  | 0  | 1  | 1  | 0  | 2  | 0  | 0  | - | 1.168003509 | 0% | (0.55) |
| NPL4_HUMAN        | B4DVG1_HUMAN |          | B4DVG1 | cDNA FLJ55643, highly similar to SEC23-interacting protein                                                                                                                                                                  | 90 kDa  | 0.048 | 5   | 3  | 2  | 2  | 1  | 0  | 0  | 0  | 2  | 0  | 0  | - | 1.168003509 | 0% | (0.55) |
| COX5B_HUMAN       | PHF2_HUMAN   | PHF2     | O75151 | Lysine-specific demethylase PHF2 (EC 1.14.11.-) (GRCS) (PHD finger protein 2)                                                                                                                                               | 121 kDa | 0.19  | 5   | 3  | 2  | 0  | 1  | 0  | 2  | 0  | 1  | 1  | 0  | - | 1.168003509 | 0% | (0.55) |
| A8K005_HUMAN (+2) | GLNA_HUMAN   | GLUL     | P15104 | Glutamine synthetase (GS) (EC 6.3.1.2) (Glutamate decarboxylase) (EC 4.1.1.15) (Glutamate--ammonia ligase)                                                                                                                  | 42 kDa  | 0.2   | 5   | 3  | 2  | 0  | 1  | 0  | 2  | 0  | 3  | 0  | 0  | - | 1.168003509 | 0% | (0.55) |
| TCRG1_HUMAN       | B3KUB9_HUMAN | SWAP70   | B3KUB9 | SWAP-70 protein, isoform CRA_b cDNA FLJ39540 fis, clone PUAEN2008314, highly similar to Switch-associated protein 70                                                                                                        | 62 kDa  | 0.018 | 4   | 3  | 2  | 1  | 0  | 1  | 0  | 1  | 1  | 0  | 0  | - | 1.168003509 | 0% | (0.55) |
| DDX58_HUMAN       | Q0P5W4_HUMAN | RCE1     | Q0P5W4 | RCE1 protein (Fragment)                                                                                                                                                                                                     | 35 kDa  | 0.091 | 5   | 3  | 2  | 0  | 1  | 0  | 2  | 0  | 2  | 0  | 0  | - | 1.168003509 | 0% | (0.55) |
| TR112_HUMAN       | CUL3_HUMAN   | CUL3     | Q13618 | Cullin-3 (CUL-3)                                                                                                                                                                                                            | 89 kDa  | 0.22  | 5   | 3  | 2  | 0  | 0  | 3  | 0  | 1  | 0  | 1  | 0  | - | 1.168003509 | 0% | (0.55) |
| EPHA2_HUMAN       | UB2L6_HUMAN  | UBE2L6   | O14933 | Ubiquitin/TSG15-conjugating enzyme E2 L6 (EC 6.3.2.19) (Retinoic acid-induced gene B protein) (RIG-B) (UbcH8) (Ubiquitin carrier protein L6) (Ubiquitin-protein ligase L6)                                                  | 18 kDa  | 0.06  | 5   | 3  | 2  | 0  | 0  | 0  | 3  | 0  | 2  | 0  | 0  | - | 1.168003509 | 0% | (0.55) |
| HBD_HUMAN         | B4E381_HUMAN |          | B4E381 | cDNA FLJ58568                                                                                                                                                                                                               | 46 kDa  | 0.71  | 5   | 3  | 2  | 2  | 1  | 0  | 0  | 0  | 0  | 1  | 1  | - | 1.168003509 | 0% | (0.55) |
| B2R6P3_HUMAN (+2) | B2RNR6_HUMAN | ZFR      | B2RNR6 | Zinc finger RNA binding protein                                                                                                                                                                                             | 117 kDa | 0.062 | 5   | 3  | 2  | 0  | 1  | 2  | 0  | 0  | 0  | 2  | 0  | - | 1.168003509 | 0% | (0.55) |
| AT2A3_HUMAN       | PTGR1_HUMAN  | PTGR1    | Q14914 | Prostaglandin reductase 1 (PRG-1) (EC 1.3.1.-) (15-oxoprostaglandin 13-reductase) (EC 1.3.1.48) (NADP-dependent leukotriene B4 12-hydroxydehydrogenase) (EC 1.3.1.74)                                                       | 36 kDa  | 0.14  | 5   | 3  | 2  | 0  | 0  | 1  | 2  | 1  | 1  | 0  | 0  | - | 1.168003509 | 0% | (0.55) |
| B4DSK8_HUMAN (+2) | GALT7_HUMAN  | GALNT7   | Q86SF2 | N-acetylgalactosaminyltransferase 7 (EC 2.4.1.-) (Polypeptide GalNAc transferase 7) (GalNAc-T7) (pp-GaNTase 7) (Protein-UDP-acetylgalactosaminyltransferase 7) (UDP-GalNAc:polypeptide N-acetylgalactosaminyltransferase 7) | 75 kDa  | 0.098 | 5   | 3  | 2  | 2  | 0  | 0  | 1  | 0  | 2  | 0  | 0  | - | 1.168003509 | 0% | (0.55) |
| ITPA_HUMAN        | G5E994_HUMAN | GPR107   | G5E994 | G protein-coupled receptor 107, isoform CRA_c (Protein GPR107)                                                                                                                                                              | 64 kDa  | 0.17  | 5   | 3  | 2  | 1  | 0  | 0  | 2  | 0  | 1  | 1  | 0  | - | 1.168003509 | 0% | (0.55) |
| IDE_HUMAN         | CLCA_HUMAN   | CLTA     | P09496 | Clathrin light chain A (Lca)                                                                                                                                                                                                | 27 kDa  | 0.047 | 5   | 3  | 2  | 0  | 1  | 2  | 0  | 1  | 0  | 1  | 0  | - | 1.168003509 | 0% | (0.55) |

|                   |              |        |        |                                                                                                                                                                                                                                                                                                                                                                                                                 |        |        |     |     |    |    |    |    |    |    |    |    |    |    |    |    |             |             |        |        |
|-------------------|--------------|--------|--------|-----------------------------------------------------------------------------------------------------------------------------------------------------------------------------------------------------------------------------------------------------------------------------------------------------------------------------------------------------------------------------------------------------------------|--------|--------|-----|-----|----|----|----|----|----|----|----|----|----|----|----|----|-------------|-------------|--------|--------|
| A8K3C5_HUMAN (+2) | GAS6_HUMAN   | GAS6   | Q14393 | Growth arrest-specific protein 6 (GAS-6) (AXL receptor tyrosine kinase ligand)                                                                                                                                                                                                                                                                                                                                  | 80 kDa | 0.058  | 5   | 3   | 2  | 3  | 0  | 0  | 0  | 0  | 0  | 0  | 0  | 0  | 2  | -  | 1.168003509 | 0%          | (0.55) |        |
| A8K3Q3_HUMAN (+1) | PLP2_HUMAN   | PLP2   | Q04941 | Proteolipid protein 2 (Differentiation-dependent protein A4) (Intestinal membrane A4 protein)                                                                                                                                                                                                                                                                                                                   | 17 kDa | 0.11   | 6   | 3   | 2  | 0  | 2  | 1  | 0  | 1  | 2  | 1  | 0  | 0  | 0  | 0  | -           | 1.168003509 | 0%     | (0.55) |
| B4DT03_HUMAN (+3) | F8WBK5_HUMAN | MRPL40 | F8WBK5 | 39S ribosomal protein L40, mitochondrial                                                                                                                                                                                                                                                                                                                                                                        | 20 kDa | 0.11   | 5   | 3   | 2  | 0  | 0  | 1  | 2  | 1  | 0  | 0  | 0  | 0  | 1  | 1  | -           | 1.168003509 | 0%     | (0.55) |
| GPAA1_HUMAN       | A8K6B4_HUMAN |        | A8K6B4 | cDNA FLJ77723                                                                                                                                                                                                                                                                                                                                                                                                   | 24 kDa | 0.063  | 5   | 3   | 2  | 2  | 0  | 0  | 1  | 0  | 0  | 2  | 0  | 0  | 0  | 0  | -           | 1.168003509 | 0%     | (0.55) |
| E5RJR5_HUMAN (+3) | GRAM4_HUMAN  | GRAMD4 | Q6IC98 | GRAM domain-containing protein 4 (Death-inducing protein)                                                                                                                                                                                                                                                                                                                                                       | 66 kDa | 0.086  | 5   | 3   | 2  | 3  | 0  | 0  | 0  | 0  | 0  | 0  | 0  | 0  | 2  | 2  | -           | 1.168003509 | 0%     | (0.55) |
| K7EIN2_HUMAN      | A6NEM5_HUMAN | PIGK   | A6NEM5 | GPI-anchor transamidase                                                                                                                                                                                                                                                                                                                                                                                         | 38 kDa | 0.21   | 5   | 3   | 2  | 1  | 0  | 0  | 2  | 1  | 0  | 0  | 0  | 0  | 1  | 1  | -           | 1.168003509 | 0%     | (0.55) |
| FND3B_HUMAN       | FKBP2_HUMAN  | FKBP2  | P26885 | Peptidyl-prolyl cis-trans isomerase FKBP2 (PPIase FKBP2) (EC 5.2.1.8) (13 kDa FK506-binding protein) (13 kDa FKBP) (FKBP-13) (FK506-binding protein 2) (FKBP-2) (Immunophilin FKBP13) (Rotamase)                                                                                                                                                                                                                | 16 kDa | 0.045  | 35  | 20  | 15 | 4  | 5  | 7  | 4  | 3  | 5  | 3  | 4  | 4  | 4  | 4  | -           | 1.168040212 | 0%     | (0.37) |
| B4DWH7_HUMAN (+2) | ARF4_HUMAN   | ARF4   | P18085 | ADP-ribosylation factor 4                                                                                                                                                                                                                                                                                                                                                                                       | 21 kDa | 0.28   | 65  | 37  | 28 | 8  | 7  | 9  | 13 | 8  | 11 | 5  | 4  | 4  | 4  | 4  | -           | 1.168076932 | 0%     | (0.30) |
| J3KMZ9_HUMAN      | B2R6K4_HUMAN |        | B2R6K4 | cDNA, FLJ92996, highly similar to Homo sapiens guanine nucleotide binding protein (G protein), beta polypeptide 1 (GNB1), mRNA                                                                                                                                                                                                                                                                                  | 37 kDa | 0.025  | 65  | 37  | 28 | 13 | 8  | 9  | 7  | 9  | 4  | 6  | 9  | 9  | 9  | 9  | -           | 1.168076932 | 0%     | (0.30) |
| E7EX90_HUMAN      | A6NN80_HUMAN | ANXA6  | A6NN80 | Annexin                                                                                                                                                                                                                                                                                                                                                                                                         | 75 kDa | 0.031  | 183 | 105 | 80 | 21 | 35 | 32 | 17 | 6  | 25 | 23 | 24 | 24 | 24 | 24 | -           | 1.168223971 | 0%     | (0.17) |
| NU214_HUMAN       | PCKGM_HUMAN  | PCK2   | Q16822 | Phosphoenolpyruvate carboxykinase [GTP], mitochondrial (PEPCK-M) (EC 4.1.1.32) (Phosphoenolpyruvate carboxylase)                                                                                                                                                                                                                                                                                                | 71 kDa | 0.033  | 161 | 92  | 70 | 15 | 32 | 33 | 12 | 18 | 12 | 14 | 27 | 27 | 27 | 27 | -           | 1.169161285 | 0%     | (0.18) |
| RL8_HUMAN         | CAN1_HUMAN   | CAPN1  | P07384 | Calpain-1 catalytic subunit (EC 3.4.22.52) (Calcium-activated neutral proteinase 1) (CANP 1) (Calpain mu-type) (Calpain-1 large subunit) (Cell proliferation-inducing gene 30 protein) (Micromolar-calpain) (muCANP)                                                                                                                                                                                            | 82 kDa | 0.1    | 101 | 58  | 44 | 18 | 10 | 12 | 18 | 11 | 7  | 16 | 10 | 10 | 10 | 10 | -           | 1.169641825 | 0%     | (0.24) |
| SNT3A_HUMAN       | GBLP_HUMAN   | GNB2L1 | P63244 | Guanine nucleotide-binding protein subunit beta-2-like 1 (Cell proliferation-inducing gene 21 protein) (Guanine nucleotide-binding protein subunit beta-like protein 12.3) (Human lung cancer oncogene 7 protein) (HLC-7) (Receptor for activated C-kinase) (Receptor of activated protein kinase C 1) (RACK1) [Cleaved into: Guanine nucleotide-binding protein subunit beta-2-like 1, N-terminally processed] | 35 kDa | 0.21   | 101 | 58  | 44 | 7  | 19 | 14 | 19 | 15 | 11 | 10 | 8  | 8  | 8  | 8  | -           | 1.169641825 | 0%     | (0.24) |
| B4DHQ3_HUMAN (+1) | Q5NKV8_HUMAN | ICAM1  | Q5NKV8 | Intercellular adhesion molecule 1                                                                                                                                                                                                                                                                                                                                                                               | 58 kDa | 0.13   | 72  | 41  | 31 | 7  | 14 | 15 | 5  | 6  | 6  | 7  | 12 | 12 | 12 | -  | 1.170217136 | 0%          | (0.29) |        |
| A0JP11_HUMAN (+1) | AT1B1_HUMAN  | ATP1B1 | P05026 | Sodium/potassium-transporting ATPase subunit beta-1 (Sodium/potassium-dependent ATPase subunit beta-1)                                                                                                                                                                                                                                                                                                          | 35 kDa | 0.052  | 42  | 24  | 18 | 11 | 5  | 4  | 4  | 3  | 3  | 6  | 6  | 6  | 6  | -  | 1.171619128 | 0%          | (0.35) |        |
| ZN292_HUMAN       | B4DKM6_HUMAN |        | B4DKM6 | cDNA FLJ54305, highly similar to Serum paraoxonase/arylesterase 2 (EC 3.1.1.2)                                                                                                                                                                                                                                                                                                                                  | 40 kDa | 0.0084 | 42  | 24  | 18 | 7  | 5  | 5  | 8  | 3  | 5  | 3  | 7  | 7  | 7  | -  | 1.171619128 | 0%          | (0.35) |        |

|                   |              |         |        |                                                                                                                                                           |         |       |     |     |     |    |    |    |    |    |    |    |    |   |             |           |
|-------------------|--------------|---------|--------|-----------------------------------------------------------------------------------------------------------------------------------------------------------|---------|-------|-----|-----|-----|----|----|----|----|----|----|----|----|---|-------------|-----------|
| B4DP99_HUMAN (+3) | NCBP1_HUMAN  | NCBP1   | Q09161 | Nuclear cap-binding protein subunit 1 (80 kDa nuclear cap-binding protein) (CBP80) (NCBP 80 kDa subunit)                                                  | 92 kDa  | 0.093 | 49  | 28  | 21  | 2  | 11 | 11 | 4  | 9  | 2  | 7  | 3  | - | 1.174235591 | 0% (0.33) |
| WDR75_HUMAN       | F8W1A4_HUMAN | AK2     | F8W1A4 | Adenylate kinase 2, mitochondrial                                                                                                                         | 26 kDa  | 0.12  | 100 | 57  | 43  | 11 | 13 | 18 | 15 | 10 | 6  | 14 | 13 | - | 1.175889305 | 0% (0.24) |
| B2RCG8_HUMAN (+2) | ERP44_HUMAN  | ERP44   | Q9BS26 | Endoplasmic reticulum resident protein 44 (ER protein 44) (ERp44) (Thioredoxin domain-containing protein 4)                                               | 47 kDa  | 0.08  | 159 | 90  | 68  | 20 | 31 | 22 | 16 | 12 | 14 | 16 | 24 | - | 1.177131235 | 0% (0.17) |
| SE1L1_HUMAN       | B7Z1R5_HUMAN | ATP6V1A | B7Z1R5 | V-type proton ATPase catalytic subunit A (cDNA FLJ51804, highly similar to Vacuolar ATP synthase catalytic subunit A, ubiquitous isoform (EC 3.6.3.14))   | 65 kDa  | 0.078 | 114 | 65  | 49  | 17 | 18 | 23 | 7  | 5  | 8  | 19 | 17 | - | 1.177716522 | 0% (0.22) |
| B4DI5_HUMAN (+4)  | LMNB1_HUMAN  | LMNB1   | P20700 | Lamin-B1                                                                                                                                                  | 66 kDa  | 0.16  | 237 | 135 | 102 | 34 | 41 | 33 | 29 | 33 | 6  | 35 | 29 | - | 1.178954457 | 0% (0.12) |
| B3KM74_HUMAN (+4) | CCAR1_HUMAN  | CCAR1   | Q8IX12 | Cell division cycle and apoptosis regulator protein 1 (Cell cycle and apoptosis regulatory protein 1) (CARP-1) (Death inducer with SAP domain)            | 133 kDa | 0.13  | 11  | 7   | 5   | 3  | 1  | 2  | 2  | 1  | 0  | 1  | 3  | - | 1.179006196 | 0% (0.47) |
| DHRS4_HUMAN       | LSM1_HUMAN   | LSM1    | O15116 | U6 snRNA-associated Sm-like protein LSM1 (Cancer-associated Sm-like) (Small nuclear ribonuclear CaSm)                                                     | 15 kDa  | 0.14  | 12  | 7   | 5   | 0  | 3  | 3  | 1  | 2  | 3  | 0  | 0  | - | 1.179006196 | 0% (0.47) |
| RBM14_HUMAN       | SEH1_HUMAN   | SEH1L   | Q96EE3 | Nucleoporin SEH1 (Nup107-160 subcomplex subunit SEH1) (SEC13-like protein)                                                                                | 40 kDa  | 0.096 | 11  | 7   | 5   | 1  | 3  | 3  | 1  | 2  | 1  | 2  | 0  | - | 1.179006196 | 0% (0.47) |
| B3KPZ2_HUMAN (+1) | SNX5_HUMAN   | SNX5    | Q9Y5X3 | Sorting nexin-5                                                                                                                                           | 47 kDa  | 0.11  | 13  | 7   | 5   | 0  | 2  | 2  | 4  | 1  | 2  | 1  | 1  | - | 1.179006196 | 0% (0.47) |
| Q53FV3_HUMAN      | Q53TD0_HUMAN | SP100   | Q53TD0 | Putative uncharacterized protein SP100 (Fragment)                                                                                                         | 97 kDa  | 0.11  | 12  | 7   | 5   | 2  | 1  | 1  | 3  | 1  | 0  | 2  | 2  | - | 1.179006196 | 0% (0.47) |
| CBPM_HUMAN        | B4DHS3_HUMAN |         | B4DHS3 | cDNA FLJ57984, highly similar to Nucleolysin TIAR                                                                                                         | 20 kDa  | 0.038 | 12  | 7   | 5   | 0  | 2  | 3  | 2  | 0  | 1  | 2  | 2  | - | 1.179006196 | 0% (0.47) |
| S27A4_HUMAN       | A8K894_HUMAN |         | A8K894 | cDNA FLJ77927                                                                                                                                             | 60 kDa  | 0.11  | 12  | 7   | 5   | 0  | 2  | 0  | 5  | 0  | 1  | 4  | 0  | - | 1.179006196 | 0% (0.47) |
| SAHH3_HUMAN       | NUD19_HUMAN  | NUDT19  | A8MXV4 | Nucleoside diphosphate-linked moiety X motif 19, mitochondrial (Nudix motif 19) (EC 3.6.1.-)                                                              | 42 kDa  | 0.08  | 12  | 7   | 5   | 4  | 1  | 2  | 0  | 3  | 1  | 1  | 0  | - | 1.179006196 | 0% (0.47) |
| I7EQF7_HUMAN      | S10AG_HUMAN  | S100A16 | Q96FQ6 | Protein S100-A16 (Aging-associated gene 13 protein) (Protein S100-F) (S100 calcium-binding protein A16)                                                   | 12 kDa  | 0.46  | 12  | 7   | 5   | 2  | 2  | 1  | 2  | 2  | 1  | 1  | 1  | - | 1.179006196 | 0% (0.47) |
| H0Y2S9_HUMAN      | Q96B24_HUMAN | ITM2B   | Q96B24 | Integral membrane protein 2B                                                                                                                              | 30 kDa  | 0.015 | 12  | 7   | 5   | 1  | 4  | 1  | 1  | 3  | 1  | 0  | 0  | - | 1.179006196 | 0% (0.47) |
| IFTT3_HUMAN       | SYFM_HUMAN   | FARS2   | Q95363 | Phenylalanine-tRNA ligase, mitochondrial (EC 6.1.1.20) (Phenylalanyl-tRNA synthetase) (PheRS)                                                             | 52 kDa  | 0.19  | 12  | 7   | 5   | 0  | 2  | 2  | 3  | 3  | 0  | 0  | 2  | - | 1.179006196 | 0% (0.47) |
| ATG9A_HUMAN (+1)  | MGN2_HUMAN   | MAGOHB  | Q96A72 | Protein mago nashi homolog 2                                                                                                                              | 17 kDa  | 0.048 | 71  | 40  | 30  | 7  | 9  | 10 | 14 | 10 | 7  | 8  | 5  | - | 1.17908213  | 0% (0.28) |
| B3KNB4_HUMAN      | B4E0H8_HUMAN |         | B4E0H8 | cDNA FLJ60385, highly similar to Integrin alpha-3                                                                                                         | 115 kDa | 0.17  | 70  | 40  | 30  | 16 | 10 | 11 | 3  | 10 | 0  | 9  | 12 | - | 1.17908213  | 0% (0.28) |
| 1433B_HUMAN (+1)  | C9JZR2_HUMAN | CTNND1  | C9JZR2 | Catenin delta-1                                                                                                                                           | 105 kDa | 0.26  | 128 | 73  | 55  | 21 | 16 | 13 | 23 | 18 | 5  | 19 | 13 | - | 1.179158128 | 0% (0.20) |
| LYSC_HUMAN        | ERP29_HUMAN  | ERP29   | P30040 | Endoplasmic reticulum resident protein 29 (ERp29) (Endoplasmic reticulum resident protein 28) (ERp28) (Endoplasmic reticulum resident protein 31) (ERp31) | 29 kDa  | 0.16  | 154 | 89  | 67  | 21 | 21 | 23 | 26 | 11 | 16 | 15 | 25 | - | 1.181291313 | 0% (0.17) |
| WDR5_HUMAN        | ARP3_HUMAN   | ACTR3   | P61158 | Actin-related protein 3 (Actin-like protein 3)                                                                                                            | 47 kDa  | 0.12  | 98  | 56  | 42  | 13 | 14 | 15 | 14 | 14 | 10 | 11 | 7  | - | 1.182425622 | 0% (0.23) |

|                  |              |         |        |                                                                                                                                           |        |       |     |     |    |    |    |    |    |    |    |    |    |   |             |           |
|------------------|--------------|---------|--------|-------------------------------------------------------------------------------------------------------------------------------------------|--------|-------|-----|-----|----|----|----|----|----|----|----|----|----|---|-------------|-----------|
| SNX3_HUMAN       | 3HIDH_HUMAN  | HIBADH  | P31937 | 3-hydroxyisobutyrate dehydrogenase, mitochondrial (HIBADH) (EC 1.1.1.31)                                                                  | 35 kDa | 0.19  | 177 | 101 | 76 | 28 | 25 | 22 | 26 | 21 | 17 | 16 | 23 | - | 1.182464308 | 0% (0.15) |
| A8K4R1_HUMAN(+2) | CSTF3_HUMAN  | CSTF3   | Q12996 | Cleavage stimulation factor subunit 3 (CF-1 77 kDa subunit) (Cleavage stimulation factor 77 kDa subunit) (CSTF 77 kDa subunit) (CstF-77)  | 83 kDa | 0.076 | 19  | 11  | 8  | 1  | 4  | 4  | 2  | 2  | 0  | 3  | 3  | - | 1.182878371 | 0% (0.42) |
| ANAG_HUMAN       | G0XQ39_HUMAN | STIM1   | G0XQ39 | STIMIL                                                                                                                                    | 89 kDa | 0.067 | 18  | 11  | 8  | 5  | 3  | 3  | 1  | 0  | 2  | 2  | 4  | - | 1.182878371 | 0% (0.42) |
| SNTB2_HUMAN      | ARHL2_HUMAN  | ADPRHL2 | Q9NX46 | Poly(ADP-ribose) glycohydrolase ARH3 (EC 3.2.1.143) (ADP-ribosylhydrolase 3) ([Protein ADP-ribosylarginine] hydrolase-like protein 2)     | 39 kDa | 0.041 | 19  | 11  | 8  | 2  | 2  | 5  | 2  | 5  | 0  | 2  | 1  | - | 1.182878371 | 0% (0.42) |
| NFKB1_HUMAN      | B2L13_HUMAN  | BCL2L13 | Q9BXX5 | Bcl-2-like protein 13 (Bcl2-L-13) (Bcl-rambo) (Protein Mil1)                                                                              | 53 kDa | 0.031 | 19  | 11  | 8  | 5  | 2  | 2  | 2  | 5  | 1  | 2  | 0  | - | 1.182878371 | 0% (0.42) |
| PPP6_HUMAN       | Q05BS6_HUMAN | UNC93B1 | Q05BS6 | UNC93B1 protein (Fragment)                                                                                                                | 57 kDa | 0.11  | 19  | 11  | 8  | 4  | 1  | 1  | 5  | 1  | 2  | 2  | 3  | - | 1.182878371 | 0% (0.42) |
| FUCO2_HUMAN      | J3QX2_HUMAN  | ARHGDI1 | J3QX2  | Rho GDP-dissociation inhibitor 1                                                                                                          | 26 kDa | 0.1   | 19  | 11  | 8  | 1  | 4  | 4  | 2  | 3  | 3  | 1  | 1  | - | 1.182878371 | 0% (0.42) |
| A6XND9_HUMAN(+3) | B1PL87_HUMAN |         | B1PL87 | Bid (Fragment)                                                                                                                            | 15 kDa | 0.23  | 19  | 11  | 8  | 1  | 3  | 4  | 3  | 2  | 5  | 1  | 0  | - | 1.182878371 | 0% (0.42) |
| LGAT1_HUMAN      | F5GZY0_HUMAN | APLP2   | F5GZY0 | Amyloid-like protein 2                                                                                                                    | 76 kDa | 0.15  | 26  | 15  | 11 | 7  | 6  | 3  | 0  | 3  | 1  | 3  | 4  | - | 1.184858778 | 0% (0.39) |
| PA1B3_HUMAN      | SYCM_HUMAN   | CARS2   | Q9HA77 | Probable cysteine-tRNA ligase, mitochondrial (EC 6.1.1.16) (Cysteinyl-tRNA synthetase) (CysRS)                                            | 62 kDa | 0.15  | 26  | 15  | 11 | 7  | 4  | 4  | 0  | 5  | 1  | 0  | 5  | - | 1.184858778 | 0% (0.39) |
| PTN12_HUMAN      | NAGK_HUMAN   | NAGK    | Q9UJ70 | N-acetyl-D-glucosamine kinase (N-acetylglucosamine kinase) (EC 2.7.1.59) (GlcNAc kinase)                                                  | 37 kDa | 0.058 | 26  | 15  | 11 | 3  | 0  | 1  | 11 | 0  | 8  | 1  | 3  | - | 1.184858778 | 0% (0.39) |
| C9J2G3_HUMAN(+2) | CYTB_HUMAN   | CSTB    | P04080 | Cystatin-B (CPI-B) (Liver thiol proteinase inhibitor) (Stefin-B)                                                                          | 11 kDa | 0.16  | 26  | 15  | 11 | 4  | 3  | 5  | 3  | 1  | 3  | 3  | 4  | - | 1.184858778 | 0% (0.39) |
| B4E0B1_HUMAN(+1) | B3KMX0_HUMAN |         | B3KMX0 | cDNA FLJ12837 fis, clone NT2RP2003228, highly similar to DNA replication licensing factor MCM4                                            | 97 kDa | 0.079 | 33  | 19  | 14 | 0  | 10 | 8  | 1  | 8  | 1  | 5  | 0  | - | 1.18606387  | 0% (0.36) |
| BCS1_HUMAN(+1)   | ALG5_HUMAN   | ALG5    | Q9Y673 | Dolichyl-phosphate beta-glucosyltransferase (DolP-glucosyltransferase) (EC 2.4.1.117) (Asparagine-linked glycosylation protein 5 homolog) | 37 kDa | 0.22  | 32  | 19  | 14 | 10 | 1  | 6  | 2  | 4  | 1  | 1  | 8  | - | 1.18606387  | 0% (0.36) |
| D6WSX3_HUMAN(+3) | RAD21_HUMAN  | RAD21   | O60216 | Double-strand-break repair protein rad21 homolog (hHR23) (Nuclear matrix protein 1) (NXP-1) (SCC1 homolog)                                | 72 kDa | 0.098 | 33  | 19  | 14 | 5  | 7  | 4  | 3  | 6  | 0  | 8  | 0  | - | 1.18606387  | 0% (0.36) |
| NIF3L_HUMAN(+1)  | B4E1R7_HUMAN |         | B4E1R7 | cDNA FLJ58224, highly similar to Calpain-2 catalytic subunit (EC 3.4.22.53)                                                               | 61 kDa | 0.14  | 40  | 23  | 17 | 8  | 8  | 6  | 1  | 3  | 9  | 3  | 2  | - | 1.186875995 | 0% (0.34) |
| NMT1_HUMAN(+1)   | RECQ1_HUMAN  | RECQL   | P46063 | ATP-dependent DNA helicase Q1 (EC 3.6.4.12) (DNA helicase, RecQ-like type 1) (RecQ1) (DNA-dependent ATPase Q1) (RecQ protein-like 1)      | 73 kDa | 0.11  | 47  | 27  | 20 | 0  | 11 | 9  | 7  | 8  | 10 | 2  | 0  | - | 1.187461587 | 0% (0.32) |
| D7PBN3_HUMAN     | D3DV26_HUMAN | S100A10 | D3DV26 | S100 calcium binding protein A10 (Annexin II ligand, calpactin I, light polypeptide (P11)), isoform CRA_b (Fragment)                      | 22 kDa | 0.039 | 54  | 31  | 23 | 14 | 5  | 6  | 6  | 3  | 6  | 5  | 9  | - | 1.18790472  | 0% (0.30) |
| PLIN3_HUMAN      | B4E1U9_HUMAN |         | B4E1U9 | cDNA FLJ54776, highly similar to Cell division control protein 42 homolog                                                                 | 27 kDa | 0.15  | 61  | 35  | 26 | 10 | 7  | 3  | 15 | 8  | 6  | 6  | 6  | - | 1.188252446 | 0% (0.29) |
| S15A3_HUMAN      | B7Z7A8_HUMAN |         | B7Z7A8 | cDNA FLJ50722, highly similar to Surfeit locus protein 4                                                                                  | 29 kDa | 0.041 | 75  | 43  | 32 | 11 | 15 | 7  | 10 | 3  | 10 | 10 | 9  | - | 1.188764972 | 0% (0.26) |



|                   |              |          |        |                                                                                                                                                                                                                                                                                                   |         |       |     |     |     |     |    |    |    |    |    |    |    |                      |                |
|-------------------|--------------|----------|--------|---------------------------------------------------------------------------------------------------------------------------------------------------------------------------------------------------------------------------------------------------------------------------------------------------|---------|-------|-----|-----|-----|-----|----|----|----|----|----|----|----|----------------------|----------------|
| IQGA2_HUMAN       | VINC_HUMAN   | VCL      | P18206 | Vinculin (Metavinculin) (MV)                                                                                                                                                                                                                                                                      | 124 kDa | 0.052 | 81  | 47  | 35  | 10  | 17 | 11 | 10 | 10 | 1  | 18 | 5  | -<br>1.1889600<br>51 | 0%<br>(0.25)   |
| THOC1_HUMAN       | RAP1A_HUMAN  | RAP1A    | P62834 | Ras-related protein Rap-1A (C21KG) (G-22K) (GTP-binding protein smg p21A) (Ras-related protein Krev-1)                                                                                                                                                                                            | 21 kDa  | 0.075 | 82  | 47  | 35  | 12  | 10 | 13 | 11 | 7  | 10 | 11 | 7  | -<br>1.1889600<br>51 | 0%<br>(0.25)   |
| Q5JW30_HUMAN      | A8K781_HUMAN |          | A8K781 | cDNA FLJ75299, highly similar to Xenopus laevis proteasome (prosome, macropain) 26S subunit, ATPase 3, mRNA                                                                                                                                                                                       | 47 kDa  | 0.075 | 88  | 51  | 38  | 6   | 15 | 13 | 17 | 11 | 12 | 11 | 4  | -<br>1.1891268<br>12 | 0%<br>(0.24)   |
| OGDHL_HUMAN       | MX1_HUMAN    | MX1      | P20591 | Interferon-induced GTP-binding protein Mx1 (Interferon-induced protein p78) (IFI-78K) (Interferon-regulated resistance GTP-binding protein MxA) (Myxoma resistance protein 1) (Myxovirus resistance protein 1) [Cleaved into: Interferon-induced GTP-binding protein Mx1, N-terminally processed] | 76 kDa  | 0.16  | 95  | 54  | 40  | 0   | 6  | 10 | 38 | 2  | 18 | 15 | 7  | -<br>1.1964487<br>95 | 0%<br>(0.22)   |
| B7ZW51_HUMAN (+8) | LMNA_HUMAN   | LMNA     | P02545 | Prelamin-A/C [Cleaved into: Lamin-A/C (70 kDa lamin) (Renal carcinoma antigen NY-REN-32)]                                                                                                                                                                                                         | 74 kDa  | 0.15  | 605 | 346 | 258 | 117 | 81 | 78 | 76 | 85 | 31 | 63 | 81 | -<br>1.1972310<br>23 | 95%<br>(0.017) |
| PAR14_HUMAN       | THIK_HUMAN   | ACAA1    | P09110 | 3-ketoacyl-CoA thiolase, peroxisomal (EC 2.3.1.16) (Acetyl-CoA acyltransferase) (Beta-ketothiolase) (Peroxisomal 3-oxoacyl-CoA thiolase)                                                                                                                                                          | 44 kDa  | 0.035 | 73  | 42  | 31  | 15  | 7  | 8  | 12 | 8  | 11 | 7  | 5  | -<br>1.1979299<br>82 | 0%<br>(0.25)   |
| B7ZKT7_HUMAN (+1) | M0R0F0_HUMAN | RPS5     | M0R0F0 | 40S ribosomal protein S5 (Fragment)                                                                                                                                                                                                                                                               | 22 kDa  | 0.035 | 70  | 38  | 28  | 8   | 9  | 7  | 15 | 10 | 9  | 4  | 5  | -<br>1.1986302<br>98 | 0%<br>(0.26)   |
| E7ET40_HUMAN (+2) | RL12_HUMAN   | RPL12    | P30050 | 60S ribosomal protein L12                                                                                                                                                                                                                                                                         | 18 kDa  | 0.14  | 66  | 38  | 28  | 7   | 8  | 10 | 13 | 8  | 7  | 7  | 6  | -<br>1.1986302<br>98 | 0%<br>(0.26)   |
| J3K000_HUMAN (+1) | Q32Q62_HUMAN | RSL1D1   | Q32Q62 | RSL1D1 protein (Fragment)                                                                                                                                                                                                                                                                         | 52 kDa  | 0.053 | 45  | 26  | 19  | 4   | 5  | 6  | 11 | 4  | 4  | 4  | 7  | -<br>1.2019937<br>19 | 0%<br>(0.31)   |
| PSB2_HUMAN        | B2R806_HUMAN | EIF3E    | B2R806 | Eukaryotic translation initiation factor 3 subunit E (eIF3e) (Eukaryotic translation initiation factor 3 subunit 6) (eIF-3 p48)                                                                                                                                                                   | 52 kDa  | 0.26  | 38  | 22  | 16  | 0   | 8  | 7  | 7  | 3  | 9  | 3  | 1  | -<br>1.2039016<br>15 | 0%<br>(0.33)   |
| ENPP4_HUMAN       | J3KQU9_HUMAN | APIG1    | J3KQU9 | AP-1 complex subunit gamma-1                                                                                                                                                                                                                                                                      | 92 kDa  | 0.075 | 38  | 22  | 16  | 5   | 7  | 6  | 4  | 7  | 1  | 6  | 2  | -<br>1.2039016<br>15 | 0%<br>(0.33)   |
| CPSF2_HUMAN       | EFTS_HUMAN   | TFSM     | P43897 | Elongation factor Ts, mitochondrial (EF-Ts) (EF-TsMt)                                                                                                                                                                                                                                             | 35 kDa  | 0.052 | 38  | 22  | 16  | 4   | 6  | 7  | 5  | 7  | 2  | 3  | 4  | -<br>1.2039016<br>15 | 0%<br>(0.33)   |
| KRR1_HUMAN        | A8K2H6_HUMAN |          | A8K2H6 | Lipase                                                                                                                                                                                                                                                                                            | 45 kDa  | 0.092 | 37  | 22  | 16  | 5   | 5  | 7  | 4  | 2  | 0  | 6  | 8  | -<br>1.2039016<br>15 | 0%<br>(0.33)   |
| GUAA_HUMAN (+1)   | VATC1_HUMAN  | ATP6V1C1 | P21283 | V-type proton ATPase subunit C 1 (V-ATPase subunit C 1) (Vacuolar proton pump subunit C 1)                                                                                                                                                                                                        | 44 kDa  | 0.098 | 31  | 18  | 13  | 2   | 5  | 4  | 8  | 2  | 4  | 4  | 3  | -<br>1.2066169<br>71 | 0%<br>(0.35)   |
| B4DHS3_HUMAN      | A8K8A4_HUMAN |          | A8K8A4 | cDNA FLJ77640, highly similar to Homo sapiens copine II (CPNE2), mRNA                                                                                                                                                                                                                             | 61 kDa  | 0.17  | 32  | 18  | 13  | 6   | 5  | 4  | 3  | 0  | 2  | 5  | 4  | -<br>1.2066169<br>71 | 0%<br>(0.35)   |
| B3KUY2_HUMAN (+2) | B4DZK8_HUMAN |          | B4DZK8 | cDNA FLJ61192, highly similar to Erythrocyte band 7 integral membrane protein                                                                                                                                                                                                                     | 31 kDa  | 0.16  | 64  | 37  | 27  | 9   | 10 | 8  | 10 | 2  | 6  | 7  | 12 | -<br>1.2094421<br>92 | 0%<br>(0.26)   |
| MRP4_HUMAN        | PRP6_HUMAN   | PRPF6    | O94906 | Pre-mRNA-processing factor 6 (Androgen receptor N-terminal domain-transactivating protein 1) (ANT-1) (PRP6 homolog) (U5 snRNP-associated 102 kDa protein) (U5-102 kDa protein)                                                                                                                    | 107 kDa | 0.032 | 23  | 14  | 10  | 4   | 4  | 3  | 3  | 0  | 1  | 6  | 3  | -<br>1.2107857<br>53 | 0%<br>(0.37)   |
| NDUS5_HUMAN       | R4GN98_HUMAN | S100A6   | R4GN98 | Protein S100-A6 (Fragment)                                                                                                                                                                                                                                                                        | 10 kDa  | 0.42  | 27  | 14  | 10  | 3   | 3  | 4  | 4  | 3  | 4  | 1  | 2  | -<br>1.2107857<br>53 | 0%<br>(0.37)   |
| PARP4_HUMAN       | SPB9_HUMAN   | SERPINB9 | P50453 | Serpin B9 (Cytoplasmic antiprotease 3) (CAP-3)                                                                                                                                                                                                                                                    | 42 kDa  | 0.026 | 24  | 14  | 10  | 1   | 4  | 6  | 3  | 0  | 5  | 2  | 0  | -<br>1.2107857<br>53 | 0%<br>(0.37)   |

|                   |              |          |        |                                                                                                                                                                                                                 |         |       |     |     |     |    |    |    |    |    |    |    |    |   |     |
|-------------------|--------------|----------|--------|-----------------------------------------------------------------------------------------------------------------------------------------------------------------------------------------------------------------|---------|-------|-----|-----|-----|----|----|----|----|----|----|----|----|---|-----|
|                   |              |          |        | (CAP3) (Peptidase inhibitor 9) (PI-9)                                                                                                                                                                           |         |       |     |     |     |    |    |    |    |    |    |    |    |   |     |
| SRP68_HUMAN       | H3BT71_HUMAN | RBMX     | H3BT71 | RNA-binding motif protein, X chromosome, N-terminally processed                                                                                                                                                 | 32 kDa  | 0.091 | 57  | 33  | 24  | 8  | 7  | 9  | 9  | 7  | 2  | 6  | 9  | - | 0%  |
| Q8N355_HUMAN      | B2R8J0_HUMAN |          | B2R8J0 | cDNA, FLJ93923, highly similar to Homo sapiens UDP-N-acetyl-alpha-D-galactosamine:polypeptide N-acetylgalactosaminyltransferase 3 (GalNAc-T3) (GALNT3), mRNA                                                    | 73 kDa  | 0.15  | 56  | 33  | 24  | 10 | 8  | 9  | 6  | 6  | 7  | 4  | 7  | - | 0%  |
| F5GXA0_HUMAN      | OGDHL_HUMAN  | OGDHL    | Q9ULD0 | 2-oxoglutarate dehydrogenase-like, mitochondrial (EC 1.2.4.-) (2-oxoglutarate dehydrogenase complex component E1-like) (OGDC-E1-like) (Alpha-ketoglutarate dehydrogenase-like)                                  | 114 kDa | 0.07  | 57  | 33  | 24  | 16 | 0  | 5  | 0  | 11 | 0  | 7  | 4  | - | 0%  |
| B4DXV9_HUMAN (+1) | GPX1_HUMAN   | GPX1     | P07203 | Glutathione peroxidase 1 (GPx-1) (GSHPx-1) (EC 1.11.1.9) (Cellular glutathione peroxidase)                                                                                                                      | 22 kDa  | 0.2   | 90  | 52  | 38  | 13 | 13 | 16 | 10 | 3  | 13 | 8  | 14 | - | 0%  |
| IF4G3_HUMAN (+1)  | CD47_HUMAN   | CD47     | Q08722 | Leukocyte surface antigen CD47 (Antigenic surface determinant protein OA3) (Integrin-associated protein) (IAP) (Protein MER6) (CD antigen CD47)                                                                 | 35 kDa  | 0.03  | 17  | 10  | 7   | 3  | 2  | 3  | 3  | 1  | 2  | 2  | 2  | - | 0%  |
| B2R5U7_HUMAN (+1) | SEC61G_HUMAN | SEC61G   | P60059 | Protein transport protein Sec61 subunit gamma                                                                                                                                                                   | 8 kDa   | 0.043 | 20  | 10  | 7   | 3  | 2  | 0  | 6  | 1  | 3  | 0  | 3  | - | 0%  |
| HELZ2_HUMAN       | FABD_HUMAN   | MCAT     | Q8IVS2 | Malonyl-CoA-acyl carrier protein transacylase, mitochondrial (MCT) (EC 2.3.1.39) (Mitochondrial malonyl CoA:ACP acyltransferase) (Mitochondrial malonyltransferase) ([Acyl-carrier-protein] malonyltransferase) | 43 kDa  | 0.015 | 17  | 10  | 7   | 6  | 0  | 4  | 1  | 1  | 1  | 1  | 4  | - | 0%  |
| K6PF_HUMAN        | STX8_HUMAN   | STX8     | Q9UNK0 | Syntaxin-8                                                                                                                                                                                                      | 27 kDa  | 0.064 | 17  | 10  | 7   | 4  | 1  | 4  | 1  | 0  | 1  | 2  | 4  | - | 0%  |
| S35B2_HUMAN       | VATG1_HUMAN  | ATP6V1G1 | O75348 | V-type proton ATPase subunit G 1 (V-ATPase subunit G 1) (V-ATPase 13 kDa subunit 1) (Vacuolar proton pump subunit G 1) (Vacuolar proton pump subunit M16)                                                       | 14 kDa  | 0.086 | 17  | 10  | 7   | 1  | 2  | 6  | 1  | 0  | 2  | 2  | 3  | - | 0%  |
| B1ALA9_HUMAN (+1) | RS18_HUMAN   | RPS18    | P62269 | 40S ribosomal protein S18 (Ke-3) (Ke3)                                                                                                                                                                          | 18 kDa  | 0.18  | 43  | 25  | 18  | 4  | 4  | 9  | 10 | 6  | 5  | 4  | 3  | - | 0%  |
| PRG2_HUMAN        | E7ESI6_HUMAN | TXNRD1   | E7ESI6 | Thioredoxin reductase 1, cytoplasmic                                                                                                                                                                            | 64 kDa  | 0.18  | 43  | 25  | 18  | 5  | 7  | 7  | 6  | 4  | 4  | 9  | 1  | - | 0%  |
| CTBP1_HUMAN (+1)  | I6RUN0_HUMAN | HLA-A    | I6RUN0 | MHC class I antigen (Fragment)                                                                                                                                                                                  | 21 kDa  | 0.055 | 88  | 51  | 37  | 0  | 0  | 11 | 21 | 0  | 8  | 13 | 12 | - | 0%  |
| DPP2_HUMAN        | ACTN4_HUMAN  | ACTN4    | O43707 | Alpha-actinin-4 (F-actin cross-linking protein) (Non-muscle alpha-actinin 4)                                                                                                                                    | 105 kDa | 0.069 | 431 | 249 | 182 | 51 | 61 | 65 | 73 | 56 | 18 | 65 | 43 | - | 95% |
| B4DH46_HUMAN (+2) | TERA_HUMAN   | VCP      | P55072 | Transitional endoplasmic reticulum ATPase (TER ATPase) (EC 3.6.4.6) (15S Mg(2+)-ATPase p97 subunit) (Valosin-containing protein) (VCP)                                                                          | 89 kDa  | 0.19  | 314 | 181 | 132 | 29 | 55 | 70 | 28 | 30 | 30 | 43 | 31 | - | 95% |
| Q5SWX3_HUMAN      | ACTN1_HUMAN  | ACTN1    | P12814 | Alpha-actinin-1 (Alpha-actinin cytoskeletal isoform) (F-actin cross-linking protein) (Non-muscle alpha-actinin-1)                                                                                               | 103 kDa | 0.062 | 234 | 136 | 99  | 26 | 35 | 43 | 32 | 34 | 15 | 29 | 21 | - | 0%  |
| PCNA_HUMAN (+1)   | S10AB_HUMAN  | S100A11  | P31949 | Protein S100-A11 (Calgizzarin) (Metastatic lymph node gene 70 protein) (MLN 70) (Protein S100-C) (S100 calcium-binding protein A11) [Cleaved into: Protein                                                      | 12 kDa  | 0.13  | 113 | 65  | 47  | 18 | 16 | 15 | 18 | 11 | 12 | 8  | 16 | - | 0%  |

|                    |              |         |        |                                                                                                                                                                                                                                                                                                                                   |         |        |     |     |     |    |    |    |    |    |    |    |    |   |             |             |
|--------------------|--------------|---------|--------|-----------------------------------------------------------------------------------------------------------------------------------------------------------------------------------------------------------------------------------------------------------------------------------------------------------------------------------|---------|--------|-----|-----|-----|----|----|----|----|----|----|----|----|---|-------------|-------------|
|                    |              |         |        | S100-A11, N-terminally processed]                                                                                                                                                                                                                                                                                                 |         |        |     |     |     |    |    |    |    |    |    |    |    |   |             |             |
| B3KWE3_HUMAN (+14) | Q53H34_HUMAN |         | Q53H34 | Ribosomal protein L13a variant (Fragment)                                                                                                                                                                                                                                                                                         | 24 kDa  | 0.038  | 31  | 17  | 12  | 4  | 5  | 3  | 5  | 4  | 5  | 1  | 2  | - | 1.23027222  | 0% (0.34)   |
| B3KX82_HUMAN       | ARF1_HUMAN   | ARF1    | P84077 | ADP-ribosylation factor 1                                                                                                                                                                                                                                                                                                         | 21 kDa  | 0.037  | 78  | 46  | 33  | 11 | 8  | 12 | 15 | 10 | 7  | 8  | 8  | - | 1.232327415 | 0% (0.20)   |
| PFD2_HUMAN         | RM21_HUMAN   | MRPL21  | Q7Z2W9 | 39S ribosomal protein L21, mitochondrial (L21mt) (MRP-L21)                                                                                                                                                                                                                                                                        | 23 kDa  | 0.17   | 10  | 6   | 4   | 4  | 1  | 0  | 1  | 1  | 1  | 0  | 2  | - | 1.233449936 | 0% (0.45)   |
| CDK1_HUMAN (+1)    | A8K3C5_HUMAN |         | A8K3C5 | cDNA FLJ77715, highly similar to Homo sapiens cisplatin resistance-associated overexpressed protein(LUC7A), mRNA                                                                                                                                                                                                                  | 51 kDa  | 0.13   | 10  | 6   | 4   | 1  | 2  | 2  | 1  | 1  | 0  | 2  | 1  | - | 1.233449936 | 0% (0.45)   |
| I3VM54_HUMAN (+1)  | DHRS4_HUMAN  | DHRS4   | Q9BT22 | Dehydrogenase/reductase SDR family member 4 (EC 1.1.1.184) (NADPH-dependent carbonyl reductase/NADP-retinol dehydrogenase) (CR) (PHCR) (NADPH-dependent retinol dehydrogenase/reductase) (NRDR) (numNRDR) (Peroxisomal short-chain alcohol dehydrogenase) (PSCD) (SCAD-SRL) (Short-chain dehydrogenase/reductase family member 4) | 30 kDa  | 0.021  | 10  | 6   | 4   | 3  | 0  | 1  | 2  | 1  | 1  | 2  | 1  | - | 1.233449936 | 0% (0.45)   |
| ANM5_HUMAN (+1)    | PLBL2_HUMAN  | PLBD2   | Q8NHP8 | Putative phospholipase B-like 2 (EC 3.1.1.-) (76 kDa protein) (p76) (LAMA-like protein 2) (Lamina ancestor homolog 2) (Phospholipase B domain-containing protein 2) [Cleaved into: Putative phospholipase B-like 2 32 kDa form; Putative phospholipase B-like 2 45 kDa form]                                                      | 65 kDa  | 0.044  | 10  | 6   | 4   | 1  | 4  | 1  | 0  | 0  | 0  | 3  | 1  | - | 1.233449936 | 0% (0.45)   |
| THOC4_HUMAN        | SRP14_HUMAN  | SRP14   | P37108 | Signal recognition particle 14 kDa protein (SRP14) (18 kDa Alu RNA-binding protein)                                                                                                                                                                                                                                               | 15 kDa  | 0.093  | 10  | 6   | 4   | 1  | 0  | 1  | 4  | 1  | 1  | 1  | 1  | - | 1.233449936 | 0% (0.45)   |
| MSLN_HUMAN         | TMM70_HUMAN  | TMEM70  | Q9BUB7 | Transmembrane protein 70, mitochondrial                                                                                                                                                                                                                                                                                           | 29 kDa  | 0.1    | 10  | 6   | 4   | 1  | 1  | 1  | 3  | 1  | 1  | 1  | 1  | - | 1.233449936 | 0% (0.45)   |
| XPP3_HUMAN         | B2RBH6_HUMAN |         | B2RBH6 | cDNA, FLJ95513, highly similar to Homo sapiens cyclin fold protein 1 (CFP1), mRNA                                                                                                                                                                                                                                                 | 39 kDa  | 0.097  | 10  | 6   | 4   | 3  | 1  | 0  | 2  | 0  | 0  | 3  | 1  | - | 1.233449936 | 0% (0.45)   |
| A8K2N5_HUMAN (+4)  | B7Z792_HUMAN |         | B7Z792 | cDNA FLJ53932, highly similar to NADH-ubiquinone oxidoreductase 49 kDa subunit, mitochondrial (EC 1.6.5.3)                                                                                                                                                                                                                        | 46 kDa  | 0.058  | 41  | 24  | 17  | 13 | 4  | 4  | 3  | 4  | 1  | 2  | 10 | - | 1.235835218 | 0% (0.29)   |
| F8J390_HUMAN (+1)  | VATL_HUMAN   | ATP6V0C | P27449 | V-type proton ATPase 16 kDa proteolipid subunit (V-ATPase 16 kDa proteolipid subunit) (Vacuolar proton pump 16 kDa proteolipid subunit)                                                                                                                                                                                           | 16 kDa  | 0.062  | 41  | 24  | 17  | 10 | 7  | 3  | 4  | 0  | 6  | 6  | 5  | - | 1.235835218 | 0% (0.29)   |
| NIPBL_HUMAN (+1)   | ARC1B_HUMAN  | ARPC1B  | O15143 | Actin-related protein 2/3 complex subunit 1B (Arap2/3 complex 41 kDa subunit) (p41-ARC)                                                                                                                                                                                                                                           | 41 kDa  | 0.0086 | 41  | 24  | 17  | 4  | 6  | 8  | 7  | 3  | 5  | 5  | 3  | - | 1.235835218 | 0% (0.29)   |
| PURA2_HUMAN        | EIF3A_HUMAN  | EIF3A   | Q14152 | Eukaryotic translation initiation factor 3 subunit A (eIF3a) (Eukaryotic translation initiation factor 3 subunit 10) (eIF-3-theta) (eIF3 p167) (eIF3 p180) (eIF3 p185)                                                                                                                                                            | 167 kDa | 0.14   | 72  | 42  | 30  | 8  | 14 | 11 | 9  | 4  | 13 | 8  | 5  | - | 1.236281532 | 0% (0.21)   |
| 2ABA_HUMAN         | E9PH29_HUMAN | PRDX3   | E9PH29 | Thioredoxin-dependent peroxide reductase, mitochondrial                                                                                                                                                                                                                                                                           | 26 kDa  | 0.092  | 165 | 96  | 69  | 28 | 27 | 18 | 24 | 19 | 18 | 14 | 18 | - | 1.236751185 | 0% (0.10)   |
| B4DZS8_HUMAN (+1)  | ACADV_HUMAN  | ACADVL  | P49748 | Very long-chain specific acyl-CoA dehydrogenase, mitochondrial (VLCAD) (EC 1.3.8.9)                                                                                                                                                                                                                                               | 70 kDa  | 0.066  | 289 | 168 | 121 | 79 | 38 | 29 | 22 | 28 | 25 | 26 | 45 | - | 1.237074891 | 95% (0.043) |
| B2RE59_HUMAN (+2)  | ABD12_HUMAN  | ABHD12  | Q8N2K0 | Monoacylglycerol lipase ABHD12 (EC 3.1.1.23) (2-arachidonoylglycerol                                                                                                                                                                                                                                                              | 45 kDa  | 0.07   | 83  | 49  | 35  | 11 | 14 | 13 | 12 | 8  | 3  | 7  | 17 | - | 1.238275207 | 0% (0.19)   |

|                   |              |         |        |                                                                                                                                                                                                                            |         |       |     |     |     |     |    |    |    |    |    |    |    |  |   |             |             |            |
|-------------------|--------------|---------|--------|----------------------------------------------------------------------------------------------------------------------------------------------------------------------------------------------------------------------------|---------|-------|-----|-----|-----|-----|----|----|----|----|----|----|----|--|---|-------------|-------------|------------|
|                   |              |         |        | hydrolase) (Abhydrolase domain-containing protein 12)                                                                                                                                                                      |         |       |     |     |     |     |    |    |    |    |    |    |    |  |   |             |             |            |
| RM41_HUMAN        | A8K2H4_HUMAN |         | A8K2H4 | cDNA FLJ78235                                                                                                                                                                                                              | 38 kDa  | 0.23  | 127 | 74  | 53  | 20  | 19 | 22 | 14 | 5  | 7  | 16 | 26 |  | - | 1.239147396 | 0% (0.13)   |            |
| L0R6Q1_HUMAN      | Q53EM5_HUMAN |         | Q53EM5 | Transketolase variant (Fragment)                                                                                                                                                                                           | 68 kDa  | 0.19  | 64  | 38  | 27  | 6   | 9  | 8  | 15 | 3  | 17 | 4  | 3  |  | - | 1.241077548 | 0% (0.22)   |            |
| TMM65_HUMAN       | CLIC5_HUMAN  | CLIC5   | Q9NZA1 | Chloride intracellular channel protein 5                                                                                                                                                                                   | 47 kDa  | 0.13  | 22  | 13  | 9   | 1   | 1  | 1  | 10 | 4  | 4  | 1  | 0  |  | - | 1.241771383 | 0% (0.36)   |            |
| TM41A_HUMAN       | NDUAB_HUMAN  | NDUFA11 | Q86Y39 | NADH dehydrogenase [ubiquinone] 1 alpha subcomplex subunit 11 (Complex I-B14.7) (CI-B14.7) (NADH-ubiquinone oxidoreductase subunit B14.7)                                                                                  | 15 kDa  | 0.083 | 22  | 13  | 9   | 3   | 4  | 3  | 2  | 4  | 1  | 3  | 1  |  | - | 1.241771383 | 0% (0.36)   |            |
| TMED5_HUMAN       | B4DWH7_HUMAN |         | B4DWH7 | cDNA FLJ57632, highly similar to Vacuolar ATP synthase subunit B, kidney isoform (EC 3.6.3.14)                                                                                                                             | 54 kDa  | 0.17  | 120 | 70  | 50  | 0   | 20 | 16 | 21 | 13 | 0  | 18 | 0  |  | - | 1.241948597 | 0% (0.14)   |            |
| SNP23_HUMAN       | EBP_HUMAN    | EBP     | Q15125 | 3-beta-hydroxysteroid-Delta(8),Delta(7)-isomerase (EC 5.3.3.5) (Cholesterol Delta-isomerase) (Delta(8)-Delta(7) sterol isomerase) (D8-D7 sterol isomerase) (Emopamil-binding protein)                                      | 26 kDa  | 0.15  | 36  | 20  | 14  | 7   | 3  | 2  | 8  | 5  | 3  | 4  | 2  |  | - | 1.24465092  | 0% (0.30)   |            |
| CLCC1_HUMAN       | E9PAV3_HUMAN | NACA    | E9PAV3 | Nascent polypeptide-associated complex subunit alpha                                                                                                                                                                       | 205 kDa | 0.04  | 34  | 20  | 14  | 2   | 7  | 5  | 6  | 3  | 4  | 4  | 3  |  | - | 1.24465092  | 0% (0.30)   |            |
| E5KSX8_HUMAN (+2) | RPR1B_HUMAN  | RPRD1B  | Q9NQG5 | Regulation of nuclear pre-mRNA domain-containing protein 1B (Cell cycle-related and expression-elevated protein in tumor)                                                                                                  | 37 kDa  | 0.19  | 34  | 20  | 14  | 0   | 6  | 3  | 11 | 1  | 5  | 6  | 2  |  | - | 1.24465092  | 0% (0.30)   |            |
| O19707_HUMAN      | SPRY4_HUMAN  | SPRYD4  | Q8WW59 | SPRY domain-containing protein 4                                                                                                                                                                                           | 23 kDa  | 0.33  | 34  | 20  | 14  | 4   | 4  | 3  | 9  | 7  | 2  | 1  | 4  |  | - | 1.24465092  | 0% (0.30)   |            |
| B7Z418_HUMAN (+1) | MYOF_HUMAN   | MYOF    | Q9NZM1 | Myoferlin (Fer-1-like protein 3)                                                                                                                                                                                           | 235 kDa | 0.12  | 492 | 287 | 205 | 167 | 56 | 47 | 20 | 32 | 42 | 46 | 83 |  | - | 1.249198591 | 95% (0.090) |            |
| PPAP_HUMAN (+1)   | ANXA4_HUMAN  | ANXA4   | P09525 | Annexin A4 (35-beta calcimedlin) (Annexin IV) (Annexin-4) (Carbohydrate-binding protein p33/p41) (Chromobindin-4) (Endonexin I) (Lipocortin IV) (P32.5) (PP4-X) (Placental anticoagulant protein II) (PAP-II) (Protein II) | 36 kDa  | 0.17  | 184 | 107 | 76  | 52  | 19 | 15 | 21 | 17 | 24 | 13 | 23 |  |   | -           | 1.251947601 | 0% (0.076) |
| DGAT1_HUMAN (+1)  | A8K3B0_HUMAN |         | A8K3B0 | cDNA FLJ77877, highly similar to Human ENO2 neuron specific (gamma) enolase                                                                                                                                                | 47 kDa  | 0.082 | 63  | 37  | 26  | 0   | 8  | 7  | 19 | 9  | 6  | 9  | 0  |  | - | 1.253843434 | 0% (0.21)   |            |
| THOC6_HUMAN       | B2R9S4_HUMAN |         | B2R9S4 | cDNA, FLJ94534, highly similar to Homo sapiens capping protein (actin filament), gelsolin-like(CAPG), mRNA                                                                                                                 | 38 kDa  | 0.073 | 27  | 16  | 11  | 4   | 3  | 3  | 6  | 1  | 2  | 3  | 5  |  | - | 1.257789327 | 0% (0.32)   |            |
| Q53G62_HUMAN (+1) | Q96K24_HUMAN |         | Q96K24 | cDNA FLJ14836 fis, clone OVARC1001702                                                                                                                                                                                      | 13 kDa  | 0.19  | 26  | 16  | 11  | 4   | 3  | 4  | 4  | 0  | 3  | 4  | 4  |  | - | 1.257789327 | 0% (0.32)   |            |
| B4DP77_HUMAN (+1) | RS10_HUMAN   | RPS10   | P46783 | 40S ribosomal protein S10                                                                                                                                                                                                  | 19 kDa  | 0.24  | 55  | 33  | 23  | 5   | 8  | 10 | 9  | 7  | 11 | 4  | 2  |  | - | 1.261605661 | 0% (0.22)   |            |
| GNL3_HUMAN        | B2R4G1_HUMAN |         | B2R4G1 | cDNA, FLJ92076, Homo sapiens likely ortholog of mouse hypoxia induced gene 1(HIG1), mRNA                                                                                                                                   | 10 kDa  | 0.11  | 17  | 9   | 6   | 4   | 1  | 1  | 3  | 0  | 2  | 2  | 2  |  | - | 1.262795217 | 0% (0.39)   |            |
| LSM4_HUMAN        | RU2B_HUMAN   | SNRPB2  | P08579 | U2 small nuclear ribonucleoprotein B' (U2 snRNP B')                                                                                                                                                                        | 25 kDa  | 0.12  | 15  | 9   | 6   | 1   | 2  | 3  | 3  | 0  | 0  | 2  | 4  |  | - | 1.262795217 | 0% (0.39)   |            |
| DHPR_HUMAN        | PRKRA_HUMAN  | PRKRA   | O75569 | Interferon-inducible double-stranded RNA-dependent protein kinase activator A (PKR-associated protein X) (PKR-associating protein X) (Protein activator of the                                                             | 34 kDa  | 0.25  | 14  | 9   | 6   | 0   | 4  | 2  | 2  | 2  | 1  | 2  | 1  |  | - | 1.262795217 | 0% (0.39)   |            |

|                   |              |          |        |                                                                                                                                                                                                                                                                                                                         |        |       |     |    |    |    |    |    |    |    |    |    |    |   |             |           |
|-------------------|--------------|----------|--------|-------------------------------------------------------------------------------------------------------------------------------------------------------------------------------------------------------------------------------------------------------------------------------------------------------------------------|--------|-------|-----|----|----|----|----|----|----|----|----|----|----|---|-------------|-----------|
|                   |              |          |        | interferon-induced protein kinase) (Protein kinase, interferon-inducible double-stranded RNA-dependent activator)                                                                                                                                                                                                       |        |       |     |    |    |    |    |    |    |    |    |    |    |   |             |           |
| A1L3A9_HUMAN (+2) | KC1A_HUMAN   | CSNK1A1  | P48729 | Casein kinase I isoform alpha (CKI-alpha) (EC 2.7.11.1) (CKI)                                                                                                                                                                                                                                                           | 39 kDa | 0.022 | 15  | 9  | 6  | 4  | 1  | 2  | 2  | 2  | 2  | 0  | 2  | - | 1.262795217 | 0% (0.39) |
| B4DKK2_HUMAN (+2) | ACOT8_HUMAN  | ACOT8    | O14734 | Acyl-coenzyme A thioesterase 8 (Acyl-CoA thioesterase 8) (EC 3.1.2.27) (Choloyl-coenzyme A thioesterase) (HIV-Nef-associated acyl-CoA thioesterase) (PTE-2) (Peroxisomal acyl-coenzyme A thioester hydrolase 1) (PTE-1) (Peroxisomal long-chain acyl-CoA thioesterase 1) (Thioesterase II) (hACTE-III) (hACTEIII) (hTE) | 36 kDa | 0.27  | 15  | 9  | 6  | 3  | 2  | 2  | 2  | 3  | 0  | 1  | 2  | - | 1.262795217 | 0% (0.39) |
| A8KAQ3_HUMAN (+1) | DGAT1_HUMAN  | DGAT1    | O75907 | Diacylglycerol O-acyltransferase 1 (EC 2.3.1.20) (ACAT-related gene product 1) (Acyl-CoA retinol O-fatty-acyltransferase) (ARAT) (Retinol O-fatty-acyltransferase) (EC 2.3.1.76) (Diglyceride acyltransferase)                                                                                                          | 55 kDa | 0.064 | 14  | 9  | 6  | 2  | 3  | 0  | 4  | 2  | 0  | 3  | 1  | - | 1.262795217 | 0% (0.39) |
| 1433F_HUMAN       | ARL8B_HUMAN  | ARL8B    | Q9NVJ2 | ADP-ribosylation factor-like protein 8B (ADP-ribosylation factor-like protein 10C) (Novel small G protein indispensable for equal chromosome segregation 1)                                                                                                                                                             | 22 kDa | 0.19  | 84  | 50 | 35 | 18 | 12 | 12 | 8  | 3  | 12 | 8  | 13 | - | 1.262933736 | 0% (0.16) |
| B4DK32_HUMAN (+1) | A8K132_HUMAN |          | A8K132 | cDNA FLJ75476, highly similar to Homo sapiens glutaminase (GLS), mRNA                                                                                                                                                                                                                                                   | 74 kDa | 0.067 | 84  | 50 | 35 | 34 | 9  | 8  | 0  | 10 | 0  | 5  | 20 | - | 1.262933736 | 0% (0.16) |
| NUDC1_HUMAN       | J3KTL2_HUMAN | SRSF1    | J3KTL2 | Serine/arginine-rich-splicing factor 1 (Splicing factor, arginine/serine-rich 1) (Splicing factor 2, alternate splicing factor), isoform CRA_g                                                                                                                                                                          | 28 kDa | 0.11  | 73  | 43 | 30 | 6  | 11 | 8  | 18 | 7  | 3  | 12 | 8  | - | 1.264882336 | 0% (0.18) |
| B4DQ14_HUMAN (+2) | CP27A_HUMAN  | CYP27A1  | Q02318 | Sterol 26-hydroxylase, mitochondrial (EC 1.14.13.15) (5-beta-cholestane-3-alpha,7-alpha,12-alpha-triol 27-hydroxylase) (Cytochrome P-450C27/25) (Cytochrome P450 27) (Sterol 27-hydroxylase) (Vitamin D(3) 25-hydroxylase)                                                                                              | 60 kDa | 0.1   | 119 | 70 | 49 | 24 | 18 | 25 | 3  | 0  | 4  | 7  | 38 | - | 1.266682226 | 0% (0.12) |
| J3QT16_HUMAN      | RL15_HUMAN   | RPL15    | P61313 | 60S ribosomal protein L15                                                                                                                                                                                                                                                                                               | 24 kDa | 0.042 | 90  | 53 | 37 | 12 | 13 | 9  | 19 | 9  | 11 | 7  | 9  | - | 1.266972703 | 0% (0.15) |
| B9EK46_HUMAN (+1) | FUBP2_HUMAN  | KHSRP    | Q92945 | Far upstream element-binding protein 2 (FUSE-binding protein 2) (KH type-splicing regulatory protein) (KSRP) (p75)                                                                                                                                                                                                      | 73 kDa | 0.022 | 32  | 19 | 13 | 2  | 6  | 8  | 3  | 2  | 1  | 8  | 2  | - | 1.269314684 | 0% (0.29) |
| EI2BG_HUMAN       | GHC1_HUMAN   | SLC25A22 | Q9H936 | Mitochondrial glutamate carrier 1 (GC-1) (Glutamate/H(+) symporter 1) (Solute carrier family 25 member 22)                                                                                                                                                                                                              | 34 kDa | 0.1   | 30  | 19 | 13 | 3  | 3  | 3  | 9  | 3  | 2  | 4  | 3  | - | 1.269314684 | 0% (0.29) |
| CAH1_HUMAN (+1)   | OXSRI_HUMAN  | OXSRI    | O95747 | Serine/threonine-protein kinase OSR1 (EC 2.7.11.1) (Oxidative stress-responsive 1 protein)                                                                                                                                                                                                                              | 58 kDa | 0.26  | 32  | 19 | 13 | 2  | 4  | 10 | 3  | 6  | 4  | 1  | 2  | - | 1.269314684 | 0% (0.29) |
| NTPCR_HUMAN (+1)  | 1A69_HUMAN   | HLA-A    | P10316 | HLA class I histocompatibility antigen, A-69 alpha chain (Aw-69) (HLA class I histocompatibility antigen, A-28 alpha chain) (MHC class I antigen A*69)                                                                                                                                                                  | 41 kDa | 0.29  | 124 | 73 | 51 | 10 | 18 | 18 | 28 | 6  | 11 | 17 | 16 | - | 1.269501705 | 0% (0.11) |
| ABCFC3_HUMAN (+1) | NDUV2_HUMAN  | NDUFV2   | P19404 | NADH dehydrogenase [ubiquinone] flavoprotein 2, mitochondrial (EC 1.6.5.3) (EC 1.6.99.3) (NADH-ubiquinone oxidoreductase 24 kDa subunit)                                                                                                                                                                                | 27 kDa | 0.038 | 49  | 29 | 20 | 11 | 8  | 4  | 6  | 5  | 4  | 4  | 8  | - | 1.271562349 | 0% (0.23) |

|                   |              |          |        |                                                                                                                                                                                                                                                                                                                                                                                   |         |       |     |    |    |    |    |    |    |    |   |    |    |   |             |           |
|-------------------|--------------|----------|--------|-----------------------------------------------------------------------------------------------------------------------------------------------------------------------------------------------------------------------------------------------------------------------------------------------------------------------------------------------------------------------------------|---------|-------|-----|----|----|----|----|----|----|----|---|----|----|---|-------------|-----------|
| A2BDK6_HUMAN (+1) | IF2B3_HUMAN  | IGF2BP3  | O00425 | Insulin-like growth factor 2 mRNA-binding protein 3 (IGF2 mRNA-binding protein 3) (IMP-3) (IGF-II mRNA-binding protein 3) (KH domain-containing protein overexpressed in cancer) (hKOC) (VICKZ family member 3)                                                                                                                                                                   | 64 kDa  | 0.015 | 100 | 59 | 41 | 4  | 15 | 12 | 29 | 21 | 5 | 14 | 1  | - | 1.273907203 | 0% (0.13) |
| NQO1_HUMAN        | Q9TP39_HUMAN | HLA-A    | Q9TP39 | MHC class I antigen (Fragment)                                                                                                                                                                                                                                                                                                                                                    | 21 kDa  | 0.17  | 88  | 52 | 36 | 7  | 0  | 11 | 21 | 0  | 8 | 0  | 12 | - | 1.277006057 | 0% (0.15) |
| DOCK7_HUMAN       | PX11B_HUMAN  | PEX11B   | O96011 | Peroxisomal membrane protein 11B (Peroxin-11B) (Peroxisomal biogenesis factor 11B) (Protein PEX11 homolog beta) (PEX11-beta)                                                                                                                                                                                                                                                      | 28 kDa  | 0.024 | 36  | 22 | 15 | 6  | 4  | 2  | 10 | 3  | 7 | 0  | 5  | - | 1.278006256 | 0% (0.26) |
| E7EQN5_HUMAN (+2) | A8MQ02_HUMAN | MLLT4    | A8MQ02 | Afadin                                                                                                                                                                                                                                                                                                                                                                            | 207 kDa | 0.044 | 19  | 12 | 8  | 6  | 3  | 2  | 1  | 7  | 0 | 0  | 0  | - | 1.279456311 | 0% (0.34) |
| B7Z920_HUMAN (+1) | IPO9_HUMAN   | IPO9     | Q96P70 | Importin-9 (Imp9) (Ran-binding protein 9) (RanBP9)                                                                                                                                                                                                                                                                                                                                | 116 kDa | 0.035 | 19  | 12 | 8  | 0  | 4  | 5  | 3  | 2  | 5 | 1  | 0  | - | 1.279456311 | 0% (0.34) |
| B3KN79_HUMAN      | A8K4I8_HUMAN |          | A8K4I8 | cDNA FLJ78131, highly similar to Homo sapiens nipsnap homolog 1 (C. elegans) (NIPSNAP1), mRNA                                                                                                                                                                                                                                                                                     | 33 kDa  | 0.086 | 59  | 35 | 24 | 8  | 5  | 4  | 18 | 9  | 7 | 3  | 6  | - | 1.282408358 | 0% (0.20) |
| TMLH_HUMAN        | HEM6_HUMAN   | CPOX     | P36551 | Coproporphyrinogen-III oxidase, mitochondrial (COX) (Coprogen oxidase) (Coproporphyrinogenase) (EC 1.3.3.3)                                                                                                                                                                                                                                                                       | 50 kDa  | 0.15  | 59  | 35 | 24 | 10 | 11 | 7  | 7  | 6  | 2 | 7  | 8  | - | 1.282408358 | 0% (0.20) |
| G8JLD3_HUMAN (+1) | A8K5N5_HUMAN |          | A8K5N5 | cDNA FLJ78142, highly similar to Homo sapiens transglutaminase 1 (K polypeptide epidermal type I, protein-glutamine-gamma-glutamyltransferase), mRNA                                                                                                                                                                                                                              | 90 kDa  | 0.026 | 81  | 48 | 33 | 16 | 10 | 7  | 16 | 25 | 0 | 4  | 3  | - | 1.284522448 | 0% (0.15) |
| A8K5K5_HUMAN (+4) | B4DYX8_HUMAN |          | B4DYX8 | cDNA FLJ56179, highly similar to Pyruvate dehydrogenase (lipoamide)-phosphatase 1 (EC 3.1.3.43)                                                                                                                                                                                                                                                                                   | 67 kDa  | 0.078 | 42  | 25 | 17 | 4  | 9  | 8  | 5  | 12 | 2 | 1  | 3  | - | 1.284795699 | 0% (0.24) |
| KPCA_HUMAN (+1)   | B2RTQ5_HUMAN | LRRC16A  | B2RTQ5 | LRRC16A protein                                                                                                                                                                                                                                                                                                                                                                   | 151 kDa | 0.07  | 3   | 2  | 1  | 0  | 0  | 1  | 1  | 1  | 0 | 0  | 0  | - | 1.290149649 | 0% (0.54) |
| B3KMR6_HUMAN (+1) | J3KMZ9_HUMAN | LDLR     | J3KMZ9 | Low-density lipoprotein receptor (Fragment)                                                                                                                                                                                                                                                                                                                                       | 105 kDa | 0.078 | 3   | 2  | 1  | 0  | 1  | 1  | 0  | 1  | 0 | 0  | 0  | - | 1.290149649 | 0% (0.54) |
| B4DSD7_HUMAN      | RL8_HUMAN    | RPL8     | P62917 | 60S ribosomal protein L8                                                                                                                                                                                                                                                                                                                                                          | 28 kDa  | 0.048 | 3   | 2  | 1  | 0  | 0  | 1  | 1  | 0  | 0 | 0  | 1  | - | 1.290149649 | 0% (0.54) |
| B4DED6_HUMAN (+2) | HELZ2_HUMAN  | HELZ2    | Q9BYK8 | Helicase with zinc finger domain 2 (ATP-dependent helicase PRIC285) (Helicase with zinc finger 2, transcriptional coactivator) (PPAR-alpha-interacting complex protein 285) (PPAR-gamma DNA-binding domain-interacting protein 1) (PDIP1) (PPAR-gamma DBD-interacting protein 1) (Peroxisomal proliferator-activated receptor A-interacting complex 285 kDa protein) (EC 3.6.4.-) | 295 kDa | 0.076 | 3   | 2  | 1  | 0  | 1  | 0  | 1  | 0  | 1 | 0  | 0  | - | 1.290149649 | 0% (0.54) |
| Q53FA5_HUMAN      | B4DST3_HUMAN |          | B4DST3 | cDNA FLJ56487, highly similar to Methionine synthase (EC 2.1.1.13)                                                                                                                                                                                                                                                                                                                | 124 kDa | 0.26  | 3   | 2  | 1  | 0  | 0  | 2  | 0  | 1  | 0 | 0  | 0  | - | 1.290149649 | 0% (0.54) |
| ADA17_HUMAN       | E7EVA0_HUMAN | MAP4     | E7EVA0 | Microtubule-associated protein                                                                                                                                                                                                                                                                                                                                                    | 245 kDa | 0.032 | 4   | 2  | 1  | 1  | 0  | 2  | 0  | 1  | 0 | 0  | 0  | - | 1.290149649 | 0% (0.54) |
| NAGAB_HUMAN       | HIP1_HUMAN   | HIP1     | O00291 | Huntingtin-interacting protein 1 (HIP-1) (Huntingtin-interacting protein 1) (HIP-1)                                                                                                                                                                                                                                                                                               | 116 kDa | 0.13  | 3   | 2  | 1  | 0  | 0  | 2  | 0  | 0  | 0 | 1  | 0  | - | 1.290149649 | 0% (0.54) |
| B4DTS6_HUMAN (+2) | SERP3_HUMAN  | SERPINE3 | A8MV23 | Serpin E3                                                                                                                                                                                                                                                                                                                                                                         | 47 kDa  | 0.057 | 3   | 2  | 1  | 0  | 1  | 0  | 1  | 0  | 1 | 0  | 0  | - | 1.290149649 | 0% (0.54) |

|                   |              |         |        |                                                                                                                                                                                                                                                                                                                                                              |         |       |   |   |   |   |   |   |   |   |   |   |   |   |   |    |
|-------------------|--------------|---------|--------|--------------------------------------------------------------------------------------------------------------------------------------------------------------------------------------------------------------------------------------------------------------------------------------------------------------------------------------------------------------|---------|-------|---|---|---|---|---|---|---|---|---|---|---|---|---|----|
| INO1_HUMAN        | B7Z8W3_HUMAN |         | B7Z8W3 | cDNA FLJ53272, highly similar to Homo sapiens LIM domain 7 (LMO7), mRNA                                                                                                                                                                                                                                                                                      | 145 kDa | 0.1   | 2 | 2 | 1 | 2 | 0 | 0 | 0 | 0 | 1 | 0 | 0 | 0 | - | 0% |
| B2RAGS_HUMAN (+1) | NASP_HUMAN   | NASP    | P49321 | Nuclear autoantigenic sperm protein (NASP)                                                                                                                                                                                                                                                                                                                   | 85 kDa  | 0.084 | 3 | 2 | 1 | 0 | 1 | 1 | 0 | 1 | 0 | 0 | 0 | 0 | - | 0% |
| CCDS1_HUMAN       | EPS8_HUMAN   | EPS8    | Q12929 | Epidermal growth factor receptor kinase substrate 8                                                                                                                                                                                                                                                                                                          | 92 kDa  | 0.11  | 2 | 2 | 1 | 2 | 0 | 0 | 0 | 0 | 1 | 0 | 0 | 0 | - | 0% |
| TRFM_HUMAN        | ARI1A_HUMAN  | ARID1A  | O14497 | AT-rich interactive domain-containing protein 1A (ARID domain-containing protein 1A) (B120) (BRG1-associated factor 250) (BAF250) (BRG1-associated factor 250a) (BAF250A) (Osa homolog 1) (hOSA1) (SWI-like protein) (SWI/SNF complex protein p270) (SWI/SNF-related, matrix-associated, actin-dependent regulator of chromatin subfamily F member 1) (hELD) | 242 kDa | 0.089 | 3 | 2 | 1 | 1 | 1 | 0 | 0 | 0 | 0 | 1 | 0 | 0 | - | 0% |
| GBF1_HUMAN (+2)   | A6NHHS_HUMAN | UPK3B   | A6NHHS | Uroplakin-3b                                                                                                                                                                                                                                                                                                                                                 | 30 kDa  | 0.03  | 4 | 2 | 1 | 2 | 0 | 0 | 0 | 1 | 0 | 0 | 0 | 0 | - | 0% |
| B4DST3_HUMAN (+3) | UIF_HUMAN    | FYTTD1  | Q96QD9 | UAP56-interacting factor (Forty-two-three domain-containing protein 1) (Protein 40-2-3)                                                                                                                                                                                                                                                                      | 36 kDa  | 0.038 | 3 | 2 | 1 | 0 | 1 | 0 | 1 | 0 | 0 | 0 | 1 | 0 | - | 0% |
| D6R952_HUMAN (+2) | B4DL79_HUMAN | KIF20A  | B4DL79 | Kinesin-like protein KIF20A (cDNA FLJ5710, highly similar to Kinesin family member 20A)                                                                                                                                                                                                                                                                      | 98 kDa  | 0.083 | 2 | 2 | 1 | 0 | 0 | 1 | 0 | 1 | 0 | 0 | 0 | 0 | - | 0% |
| DHB7_HUMAN (+1)   | SNTB1_HUMAN  | SNTB1   | Q13884 | Beta-1-syntrophin (59 kDa dystrophin-associated protein A1 basic component 1) (DAP1B) (BSYN2) (Syntrophin-2) (Tax interaction protein 43) (TIP-43)                                                                                                                                                                                                           | 58 kDa  | 0.11  | 4 | 2 | 1 | 0 | 0 | 0 | 2 | 0 | 0 | 0 | 0 | 1 | - | 0% |
| ARSA_HUMAN (+1)   | SIA4A_HUMAN  | ST3GAL1 | Q11201 | CMP-N-acetylneuraminic-beta-galactosidase-alpha-2,3-sialyltransferase 1 (Alpha 2,3-ST 1) (Beta-galactosidase alpha-2,3-sialyltransferase 1) (EC 2.4.99.4) (Gal-NAc6S) (Gal-beta-1,3-GalNAc-alpha-2,3-sialyltransferase) (SIATFL) (ST3Gal I) (ST3GalII) (ST3GalA.1) (ST3O) (Sialyltransferase 4A) (SIAT4-A)                                                   | 39 kDa  | 0.061 | 3 | 2 | 1 | 1 | 0 | 1 | 0 | 0 | 0 | 0 | 0 | 0 | - | 0% |
| F5H013_HUMAN (+2) | PAG15_HUMAN  | PLA2G15 | Q8NCC3 | Group XV phospholipase A2 (EC 2.3.1.-) (1-O-acylseramide synthase) (ACS) (LCAT-like lysophospholipase) (LLPL) (Lysophospholipase 3) (Lysosomal phospholipase A2) (LPLA2)                                                                                                                                                                                     | 47 kDa  | 0.29  | 3 | 2 | 1 | 0 | 1 | 1 | 0 | 0 | 0 | 1 | 0 | 0 | - | 0% |
| A5PLM9_HUMAN (+2) | VP33B_HUMAN  | VPS33B  | Q9H267 | Vacuolar protein sorting-associated protein 33B (hVPS33B)                                                                                                                                                                                                                                                                                                    | 71 kDa  | 0.12  | 3 | 2 | 1 | 0 | 0 | 1 | 1 | 0 | 1 | 0 | 0 | 0 | - | 0% |
| B7Z4S4_HUMAN (+2) | PR38B_HUMAN  | PRPF38B | Q5VTL8 | Pre-mRNA-splicing factor 38B (Sarcoma antigen NY-SAR-27)                                                                                                                                                                                                                                                                                                     | 64 kDa  | 0.14  | 3 | 2 | 1 | 0 | 0 | 0 | 2 | 0 | 1 | 0 | 0 | 0 | - | 0% |
| ATPF2_HUMAN       | A8KAL2_HUMAN |         | A8KAL2 | cDNA FLJ76981, highly similar to Homo sapiens golgi autoantigen, golgin subfamily a, 5 (GOLGA5), mRNA                                                                                                                                                                                                                                                        | 83 kDa  | 0.12  | 3 | 2 | 1 | 0 | 1 | 1 | 0 | 0 | 0 | 1 | 0 | 0 | - | 0% |
| Q5JWT2_HUMAN      | PLXB1_HUMAN  | PLXNB1  | Q43157 | Plexin-B1 (Semaphorin receptor SEP)                                                                                                                                                                                                                                                                                                                          | 232 kDa | 0.026 | 3 | 2 | 1 | 1 | 0 | 0 | 1 | 1 | 0 | 0 | 0 | 0 | - | 0% |
| RTN1_HUMAN        | Q53F88_HUMAN |         | Q53F88 | General transcription factor IIE, polypeptide 1 (Alpha subunit, 56kD) variant (Fragment)                                                                                                                                                                                                                                                                     | 40 kDa  | 0.061 | 4 | 2 | 1 | 0 | 0 | 2 | 0 | 0 | 0 | 0 | 1 | 0 | - | 0% |

|                   |              |          |        |                                                                                                                                                                                                       |         |       |     |    |    |    |   |    |    |   |    |    |    |   |   |             |    |         |
|-------------------|--------------|----------|--------|-------------------------------------------------------------------------------------------------------------------------------------------------------------------------------------------------------|---------|-------|-----|----|----|----|---|----|----|---|----|----|----|---|---|-------------|----|---------|
| NNMT_HUMAN        | B7ZLX5_HUMAN | PTPRG    | B7ZLX5 | PTPRG protein                                                                                                                                                                                         | 159 kDa | 0.1   | 2   | 2  | 1  | 0  | 0 | 1  | 0  | 1 | 0  | 0  | 0  | 0 | - | 1.290149649 | 0% | (0.54)  |
| B4DG57_HUMAN (+1) | A8K2W6_HUMAN |          | A8K2W6 | cDNA FLJ76248, highly similar to Homo sapiens phospholipase A2, group VII (platelet-activating factor acetylhydrolase, plasma) (PLA2G7), mRNA                                                         | 50 kDa  | 0.018 | 3   | 2  | 1  | 0  | 2 | 0  | 0  | 0 | 0  | 0  | 0  | 1 | - | 1.290149649 | 0% | (0.54)  |
| CATH_HUMAN (+1)   | A8MXZ4_HUMAN | GPRC5C   | A8MXZ4 | G-protein-coupled receptor family C group 5 member C (Fragment)                                                                                                                                       | 50 kDa  | 0.14  | 3   | 2  | 1  | 2  | 0 | 0  | 0  | 0 | 1  | 0  | 0  | 0 | - | 1.290149649 | 0% | (0.54)  |
| E9PGN7_HUMAN      | CP1A1_HUMAN  | CYP1A1   | P04798 | Cytochrome P450 1A1 (EC 1.14.14.1) (CYP1A1) (Cytochrome P450 form 6) (Cytochrome P450-C) (Cytochrome P450-P1)                                                                                         | 58 kDa  | 0.099 | 3   | 2  | 1  | 0  | 0 | 1  | 1  | 1 | 0  | 0  | 0  | 0 | - | 1.290149649 | 0% | (0.54)  |
| H0Y6T6_HUMAN      | G8JLK1_HUMAN | USE1     | G8JLK1 | Vesicle transport protein USE1                                                                                                                                                                        | 29 kDa  | 0.18  | 3   | 2  | 1  | 2  | 0 | 0  | 0  | 0 | 0  | 0  | 0  | 1 | - | 1.290149649 | 0% | (0.54)  |
| FA83H_HUMAN (+1)  | R4GN49_HUMAN | S100A2   | R4GN49 | Protein S100-A2                                                                                                                                                                                       | 7 kDa   | 0.031 | 3   | 2  | 1  | 2  | 0 | 0  | 0  | 1 | 0  | 0  | 0  | 0 | - | 1.290149649 | 0% | (0.54)  |
| C9JC84_HUMAN (+1) | MRT4_HUMAN   | MRTO4    | Q9UKD2 | mRNA turnover protein 4 homolog                                                                                                                                                                       | 28 kDa  | 0.085 | 3   | 2  | 1  | 0  | 0 | 0  | 2  | 1 | 0  | 0  | 0  | 0 | - | 1.290149649 | 0% | (0.54)  |
| B3KMS0_HUMAN (+2) | B7Z3I9_HUMAN | ALAD     | B7Z3I9 | Delta-aminolevulinic acid dehydratase (EC 4.2.1.24)                                                                                                                                                   | 35 kDa  | 0.065 | 3   | 2  | 1  | 0  | 0 | 0  | 2  | 0 | 1  | 0  | 0  | 0 | - | 1.290149649 | 0% | (0.54)  |
| TMED1_HUMAN       | B3KTL0_HUMAN |          | B3KTL0 | cDNA FLJ38437 fix, clone FEBRA2016572, highly similar to Membralin                                                                                                                                    | 48 kDa  | 0.097 | 3   | 2  | 1  | 2  | 0 | 0  | 0  | 0 | 0  | 1  | 0  | 0 | - | 1.290149649 | 0% | (0.54)  |
| B4DXJ1_HUMAN (+2) | CTBP2_HUMAN  | CTBP2    | P56545 | C-terminal-binding protein 2 (CtBP2)                                                                                                                                                                  | 49 kDa  | 0.071 | 3   | 2  | 1  | 0  | 0 | 1  | 1  | 0 | 0  | 1  | 0  | 0 | - | 1.290149649 | 0% | (0.54)  |
| OSTC_HUMAN        | VAMP8_HUMAN  | VAMP8    | Q9BV40 | Vesicle-associated membrane protein 8 (VAMP-8) (Endobrevin) (EDB)                                                                                                                                     | 11 kDa  | 0.14  | 3   | 2  | 1  | 1  | 0 | 1  | 0  | 0 | 0  | 0  | 1  | 0 | - | 1.290149649 | 0% | (0.54)  |
| LTOR2_HUMAN       | CAMP_HUMAN   | CAMP     | P49913 | Cathelicidin antimicrobial peptide (18 kDa cationic antimicrobial protein) (CAP-18) (hCAP-18) [Cleaved into: Antibacterial protein FALL-39 (FALL-39 peptide antibiotic); Antibacterial protein LL-37] | 19 kDa  | 0.29  | 3   | 2  | 1  | 1  | 0 | 0  | 1  | 0 | 1  | 0  | 0  | 0 | - | 1.290149649 | 0% | (0.54)  |
| RHOG_HUMAN        | GGCT_HUMAN   | GGCT     | O75223 | Gamma-glutamylcyclotransferase (EC 2.3.2.4) (Cytochrome c-releasing factor 21)                                                                                                                        | 21 kDa  | 0.13  | 3   | 2  | 1  | 0  | 0 | 0  | 2  | 0 | 1  | 0  | 0  | 0 | - | 1.290149649 | 0% | (0.54)  |
| J3QRU1_HUMAN      | NAT10_HUMAN  | NAT10    | Q9H0A0 | N-acetyltransferase 10 (EC 2.3.1.-)                                                                                                                                                                   | 116 kDa | 0.11  | 25  | 15 | 10 | 0  | 2 | 4  | 9  | 1 | 2  | 8  | 0  | 0 | - | 1.290198119 | 0% | (0.31)  |
| I2BPL_HUMAN       | CBX5_HUMAN   | CBX5     | P45973 | Chromobox protein homolog 5 (Antigen p25) (Heterochromatin protein 1 homolog alpha) (HP1 alpha)                                                                                                       | 22 kDa  | 0.055 | 25  | 15 | 10 | 0  | 6 | 1  | 6  | 4 | 0  | 4  | 0  | 0 | - | 1.290198119 | 0% | (0.31)  |
| BGH3_HUMAN (+2)   | ALDR_HUMAN   | AKR1B1   | P15121 | Aldose reductase (AR) (EC 1.1.1.21) (Aldehyde reductase) (Aldo-keto reductase family 1 member B1)                                                                                                     | 36 kDa  | 0.059 | 25  | 15 | 10 | 0  | 5 | 6  | 0  | 0 | 0  | 0  | 7  | 0 | - | 1.290198119 | 0% | (0.31)  |
| SRS11_HUMAN       | B7Z4B8_HUMAN | HNRNPUL1 | B7Z4B8 | Heterogeneous nuclear ribonucleoprotein U-like protein 1 (cDNA FLJ56481, highly similar to Heterogeneous nuclear ribonucleoprotein U-like protein 1)                                                  | 86 kDa  | 0.052 | 47  | 28 | 19 | 6  | 6 | 5  | 11 | 7 | 2  | 6  | 4  | 0 | - | 1.290246606 | 0% | (0.22)  |
| NDK3_HUMAN (+1)   | GNAS1_HUMAN  | GNAS     | Q5JWF2 | Guanine nucleotide-binding protein G(s) subunit alpha isoforms XLas (Adenylylate cyclase-stimulating G alpha protein) (Extra large alpha protein) (XLalphas)                                          | 111 kDa | 0.25  | 69  | 41 | 28 | 12 | 9 | 11 | 9  | 5 | 6  | 9  | 8  | 0 | - | 1.290295109 | 0% | (0.17)  |
| J3KN32_HUMAN (+1) | MFN2_HUMAN   | MFN2     | O95140 | Mitofusin-2 (EC 3.6.5.-) (Transmembrane GTPase MFN2)                                                                                                                                                  | 86 kDa  | 0.091 | 30  | 18 | 12 | 10 | 3 | 2  | 3  | 1 | 2  | 3  | 6  | 0 | - | 1.297701073 | 0% | (0.28)  |
| PLRKT_HUMAN       | FINC_HUMAN   | FN1      | P02751 | Fibronectin (FN) (Cold-insoluble globulin) (CIG)                                                                                                                                                      | 263 kDa | 0.21  | 138 | 82 | 56 | 62 | 0 | 0  | 0  | 0 | 12 | 15 | 26 | 0 | - | 1.299124833 | 0% | (0.074) |



|                   |              |         |        | [Cleared into: Anastellin; Ugl-Y1; Ugl-Y2; Ugl-Y3]                                                                                                                                                                                                                                 |         |       |     |    |    |    |    |    |    |    |   |    |    |   |             |            |
|-------------------|--------------|---------|--------|------------------------------------------------------------------------------------------------------------------------------------------------------------------------------------------------------------------------------------------------------------------------------------|---------|-------|-----|----|----|----|----|----|----|----|---|----|----|---|-------------|------------|
| G45IP_HUMAN       | A2AB90_HUMAN | TAPBP   | A2AB90 | Tapasin                                                                                                                                                                                                                                                                            | 49 kDa  | 0.16  | 35  | 21 | 14 | 1  | 7  | 5  | 9  | 0  | 2 | 7  | 5  | - | 1.303239476 | 0% (0.25)  |
| RMND1_HUMAN       | CATA_HUMAN   | CAT     | P04040 | Catalase (EC 1.11.1.6)                                                                                                                                                                                                                                                             | 60 kDa  | 0.071 | 67  | 40 | 27 | 9  | 8  | 11 | 13 | 3  | 9 | 6  | 9  | - | 1.304350701 | 0% (0.16)  |
| PLBL2_HUMAN       | F8W930_HUMAN | IGF2BP2 | F8W930 | Insulin-like growth factor 2 mRNA-binding protein 2                                                                                                                                                                                                                                | 67 kDa  | 0.1   | 135 | 81 | 55 | 6  | 27 | 31 | 19 | 32 | 5 | 15 | 2  | - | 1.306339864 | 0% (0.071) |
| B3KRC6_HUMAN (+1) | A8K883_HUMAN | A8K883  | A8K883 | cDNA FLJ77590, highly similar to Homo sapiens leucine rich repeat containing 1, mRNA                                                                                                                                                                                               | 59 kDa  | 0.11  | 40  | 24 | 16 | 11 | 2  | 5  | 6  | 6  | 0 | 6  | 2  | - | 1.307496651 | 0% (0.23)  |
| H0Y8R1_HUMAN      | ARF5_HUMAN   | ARF5    | P84085 | ADP-ribosylation factor 5                                                                                                                                                                                                                                                          | 21 kDa  | 0.046 | 40  | 24 | 16 | 0  | 0  | 0  | 10 | 0  | 4 | 0  | 0  | - | 1.307496651 | 0% (0.23)  |
| B4DDF4_HUMAN (+3) | ERAP1_HUMAN  | ERAP1   | Q9NZ08 | Endoplasmic reticulum aminopeptidase 1 (EC 3.4.11.-) (ARTS-1) (Adipocyte-derived leucine aminopeptidase) (A-LAP) (Aminopeptidase PILS) (Purromycin-insensitive leucyl-specific aminopeptidase) (PILS-AP) (Type 1 tumor necrosis factor receptor shedding aminopeptidase regulator) | 107 kDa | 0.11  | 119 | 71 | 48 | 17 | 16 | 29 | 8  | 3  | 4 | 21 | 20 | - | 1.310576351 | 0% (0.083) |
| A8K894_HUMAN (+4) | Q5VU59_HUMAN | TPM3    | Q5VU59 | Uncharacterized protein                                                                                                                                                                                                                                                            | 27 kDa  | 0.089 | 83  | 49 | 33 | 4  | 12 | 17 | 16 | 6  | 7 | 12 | 8  | - | 1.310620972 | 0% (0.13)  |
| B4DZA5_HUMAN      | FAHD1_HUMAN  | FAHD1   | Q6P587 | Acylpyruvate FAHD1, mitochondrial (EC 3.7.1.5) (Fumarylacetoacetate hydrolase domain-containing protein 1) (YisK-like protein)                                                                                                                                                     | 25 kDa  | 0.033 | 46  | 27 | 18 | 5  | 7  | 4  | 11 | 4  | 3 | 4  | 7  | - | 1.310871942 | 0% (0.21)  |
| PCP_HUMAN         | DDRKG_HUMAN  | DDRKG1  | Q96HY6 | DDRKG domain-containing protein 1                                                                                                                                                                                                                                                  | 36 kDa  | 0.071 | 45  | 27 | 18 | 6  | 4  | 4  | 13 | 5  | 1 | 5  | 7  | - | 1.310871942 | 0% (0.21)  |
| TXD17_HUMAN       | A4QN18_HUMAN | SEC16A  | A4QN18 | SEC16A protein (Fragment)                                                                                                                                                                                                                                                          | 211 kDa | 0.38  | 8   | 5  | 3  | 2  | 1  | 1  | 1  | 1  | 1 | 1  | 0  | - | 1.313513614 | 0% (0.43)  |
| HIX_HUMAN         | SNTB2_HUMAN  | SNTB2   | Q13425 | Beta-2-syntrophin (59 kDa dystrophin-associated protein A1 basic component 2) (Syntrophin-3) (SNT3) (Syntrophin-like) (SNTL)                                                                                                                                                       | 58 kDa  | 0.23  | 8   | 5  | 3  | 1  | 3  | 1  | 0  | 1  | 0 | 1  | 1  | - | 1.313513614 | 0% (0.43)  |
| MAAL_HUMAN        | ACS2L_HUMAN  | ACSS1   | Q9NUB1 | Acetyl-coenzyme A synthetase 2-like, mitochondrial (EC 6.2.1.1) (Acetate--CoA ligase 2) (Acetyl-CoA synthetase 2) (AceCS2) (Acyl-CoA synthetase short-chain family member 1)                                                                                                       | 75 kDa  | 0.13  | 7   | 5  | 3  | 0  | 2  | 1  | 1  | 3  | 0 | 0  | 0  | - | 1.313513614 | 0% (0.43)  |
| GSTM2_HUMAN (+1)  | SCFD2_HUMAN  | SCFD2   | Q8WU76 | Sec1 family domain-containing protein 2 (Syntaxin-binding protein 1-like 1)                                                                                                                                                                                                        | 75 kDa  | 0.21  | 8   | 5  | 3  | 0  | 1  | 1  | 3  | 2  | 1 | 0  | 0  | - | 1.313513614 | 0% (0.43)  |
| FIBB_HUMAN (+1)   | ELMD2_HUMAN  | ELMOD2  | Q8IZ81 | ELMO domain-containing protein 2                                                                                                                                                                                                                                                   | 35 kDa  | 0.18  | 8   | 5  | 3  | 4  | 0  | 0  | 1  | 1  | 1 | 1  | 0  | - | 1.313513614 | 0% (0.43)  |
| RRP1B_HUMAN       | E7EWW1_HUMAN | PIGG    | E7EWW1 | GPI ethanolamine phosphate transferase 2                                                                                                                                                                                                                                           | 99 kDa  | 0.028 | 8   | 5  | 3  | 4  | 1  | 0  | 0  | 1  | 0 | 2  | 0  | - | 1.313513614 | 0% (0.43)  |
| A8K5X9_HUMAN (+1) | A8K5L5_HUMAN | A8K5L5  | A8K5L5 | cDNA FLJ75689, highly similar to Homo sapiens poliovirus receptor-related 2 (herpesvirus entry mediator B) (PVRL2), mRNA                                                                                                                                                           | 51 kDa  | 0.026 | 8   | 5  | 3  | 0  | 3  | 1  | 1  | 0  | 0 | 2  | 1  | - | 1.313513614 | 0% (0.43)  |
| A8K9U6_HUMAN (+1) | B2R7V4_HUMAN | B2R7V4  | B2R7V4 | cDNA, FLJ93619, highly similar to Homo sapiens PRP4 pre-mRNA processing factor 4 homolog (yeast) (PRPF4), mRNA                                                                                                                                                                     | 58 kDa  | 0.052 | 8   | 5  | 3  | 0  | 2  | 0  | 3  | 0  | 1 | 2  | 0  | - | 1.313513614 | 0% (0.43)  |
| DHSO_HUMAN        | AG10A_HUMAN  | ALG10   | Q5BKT4 | Dol-P-Glc:Glc(2)Man(9)GlcNAc(2)-PP-Dol alpha-1,2-glucosyltransferase (EC                                                                                                                                                                                                           | 56 kDa  | 0.13  | 9   | 5  | 3  | 1  | 1  | 1  | 2  | 1  | 0 | 1  | 1  | - | 1.313513614 | 0% (0.43)  |

|                   |              |       |        |                                                                                                                                                 |         |       |    |    |    |    |    |    |    |    |    |    |   |   |   |             |           |
|-------------------|--------------|-------|--------|-------------------------------------------------------------------------------------------------------------------------------------------------|---------|-------|----|----|----|----|----|----|----|----|----|----|---|---|---|-------------|-----------|
|                   |              |       |        | 2.4.1.256) (Alpha-1,2-glucosyltransferase ALG10-A) (Alpha-2-glucosyltransferase ALG10-A) (Asparagine-linked glycosylation protein 10 homolog A) |         |       |    |    |    |    |    |    |    |    |    |    |   |   |   |             |           |
| DHRS1_HUMAN       | CAH2_HUMAN   | CA2   | P00918 | Carbonic anhydrase 2 (EC 4.2.1.1) (Carbonate dehydratase II) (Carbonic anhydrase C) (CAC) (Carbonic anhydrase II) (CA-II)                       | 29 kDa  | 0.13  | 8  | 5  | 3  | 2  | 1  | 0  | 2  | 0  | 0  | 0  | 0 | 3 | - | 1.313513614 | 0% (0.43) |
| F6M9T7_HUMAN (+1) | A8K321_HUMAN |       | A8K321 | cDNA FLJ78524, highly similar to Homo sapiens SMILE protein (SMILE), mRNA                                                                       | 102 kDa | 0.11  | 8  | 5  | 3  | 5  | 0  | 0  | 0  | 0  | 0  | 0  | 1 | 2 | - | 1.313513614 | 0% (0.43) |
| COIL_HUMAN        | SCRN1_HUMAN  | SCRN1 | Q12765 | Secernin-1                                                                                                                                      | 46 kDa  | 0.049 | 8  | 5  | 3  | 0  | 2  | 0  | 3  | 0  | 3  | 0  | 0 | 0 | - | 1.313513614 | 0% (0.43) |
| DTX3L_HUMAN       | B3KM57_HUMAN |       | B3KM57 | cDNA FLJ10347 fis, clone NT2RM2001035, highly similar to CCR4-NOT transcription complex subunit 7                                               | 33 kDa  | 0.043 | 8  | 5  | 3  | 1  | 2  | 1  | 1  | 1  | 0  | 1  | 1 | 1 | - | 1.313513614 | 0% (0.43) |
| NUD19_HUMAN       | B4DYY5_HUMAN |       | B4DYY5 | cDNA FLJ55671, highly similar to Ubiquitin-associated protein 2-like                                                                            | 114 kDa | 0.18  | 8  | 5  | 3  | 1  | 2  | 1  | 1  | 1  | 1  | 0  | 1 | 1 | - | 1.313513614 | 0% (0.43) |
| RFIP1_HUMAN       | DNLZ_HUMAN   | DNLZ  | Q5SXM8 | DNL-type zinc finger protein (Hsp70-escort protein 1) (HEP1) (mHsp70-escort protein)                                                            | 19 kDa  | 0.018 | 7  | 5  | 3  | 0  | 2  | 2  | 1  | 1  | 0  | 1  | 1 | 1 | - | 1.313513614 | 0% (0.43) |
| TEX2_HUMAN        | TBK1_HUMAN   | TBK1  | Q9UHD2 | Serine/threonine-protein kinase TBK1 (EC 2.7.1.1) (NF-kappa-B-activating kinase) (T2K) (TANK-binding kinase 1)                                  | 84 kDa  | 0.024 | 8  | 5  | 3  | 0  | 3  | 2  | 0  | 1  | 1  | 1  | 0 | 0 | - | 1.313513614 | 0% (0.43) |
| EI2BE_HUMAN       | B4DNC0_HUMAN |       | B4DNC0 | cDNA FLJ61141, highly similar to Ras-related protein Rab-34                                                                                     | 31 kDa  | 0.031 | 8  | 5  | 3  | 3  | 0  | 0  | 2  | 0  | 2  | 0  | 1 | 1 | - | 1.313513614 | 0% (0.43) |
| PSB8_HUMAN (+1)   | Q5U0F7_HUMAN |       | Q5U0F7 | Phosphatidic acid phosphatase type 2B                                                                                                           | 35 kDa  | 0.13  | 8  | 5  | 3  | 0  | 3  | 2  | 0  | 0  | 3  | 0  | 0 | 0 | - | 1.313513614 | 0% (0.43) |
| SRP72_HUMAN       | C9IZG4_HUMAN | CUTA  | C9IZG4 | Protein CutA                                                                                                                                    | 14 kDa  | 0.11  | 8  | 5  | 3  | 0  | 1  | 1  | 3  | 1  | 0  | 1  | 1 | 1 | - | 1.313513614 | 0% (0.43) |
| A2A2G4_HUMAN (+1) | F8W9Y0_HUMAN | STX3  | F8W9Y0 | Syntaxin-3                                                                                                                                      | 30 kDa  | 0.049 | 8  | 5  | 3  | 3  | 0  | 1  | 1  | 0  | 0  | 1  | 2 | 2 | - | 1.313513614 | 0% (0.43) |
| CLP1L_HUMAN (+1)  | B5MCX3_HUMAN | 37500 | B5MCX3 | Septin-2                                                                                                                                        | 37 kDa  | 0.084 | 50 | 30 | 20 | 1  | 11 | 10 | 8  | 3  | 8  | 3  | 6 | 6 | - | 1.313614352 | 0% (0.20) |
| A8K337_HUMAN (+1) | Q53GW1_HUMAN |       | Q53GW1 | Vesicle transport-related protein isoform a variant (Fragment)                                                                                  | 72 kDa  | 0.088 | 92 | 55 | 37 | 18 | 15 | 17 | 6  | 16 | 6  | 8  | 7 | 7 | - | 1.313715154 | 0% (0.11) |
| DUT_HUMAN (+1)    | MCU_HUMAN    | MCU   | Q8NE86 | Calcium uniporter protein, mitochondrial (Coiled-coil domain-containing protein 109A)                                                           | 40 kDa  | 0.16  | 97 | 58 | 39 | 26 | 8  | 10 | 14 | 8  | 13 | 9  | 8 | 8 | - | 1.315033579 | 0% (0.10) |
| ADRO_HUMAN (+2)   | D3DUZ3_HUMAN | IFI16 | D3DUZ3 | Interferon, gamma-inducible protein 16, isoform CRA_a (Interferon, gamma-inducible protein 16, isoform CRA_b)                                   | 82 kDa  | 0.14  | 58 | 36 | 24 | 2  | 6  | 8  | 20 | 3  | 5  | 12 | 4 | 4 | - | 1.317802078 | 0% (0.17) |
| B7Z747_HUMAN      | Q53G61_HUMAN |       | Q53G61 | Small nuclear ribonucleoprotein polypeptide A' variant (Fragment)                                                                               | 28 kDa  | 0.22  | 65 | 39 | 26 | 7  | 9  | 10 | 13 | 6  | 5  | 6  | 9 | 9 | - | 1.319437795 | 0% (0.15) |
| S10AG_HUMAN       | B4E1L5_HUMAN |       | B4E1L5 | cDNA FLJ51601, highly similar to Interferon-induced guanylate-binding protein 1                                                                 | 64 kDa  | 0.22  | 12 | 8  | 5  | 0  | 0  | 0  | 8  | 2  | 0  | 2  | 1 | 1 | - | 1.321933024 | 0% (0.37) |
| MGST2_HUMAN       | B2R858_HUMAN |       | B2R858 | cDNA, FLJ93750, Homo sapiens DEAD (Asp-Glu-Ala-Asp) box polypeptide 6 (DDX6), mRNA                                                              | 53 kDa  | 0.18  | 13 | 8  | 5  | 1  | 2  | 3  | 2  | 1  | 2  | 1  | 1 | 1 | - | 1.321933024 | 0% (0.37) |
| Q96B24_HUMAN      | A8KA56_HUMAN |       | A8KA56 | cDNA FLJ77678, highly similar to Homo sapiens DEAD (Asp-Glu-Ala-Asp) box polypeptide 23, mRNA                                                   | 96 kDa  | 0.17  | 13 | 8  | 5  | 1  | 3  | 2  | 2  | 0  | 1  | 4  | 0 | 0 | - | 1.321933024 | 0% (0.37) |
| NOL9_HUMAN        | A8K3Q3_HUMAN |       | A8K3Q3 | cDNA FLJ78230                                                                                                                                   | 48 kDa  | 0.06  | 13 | 8  | 5  | 1  | 4  | 1  | 2  | 0  | 2  | 2  | 1 | 1 | - | 1.321933024 | 0% (0.37) |

|                   |              |           |        |                                                                                                                                                                                                                                                                                                                                                                          |         |       |     |     |    |    |    |    |    |    |    |    |    |   |             |     |         |
|-------------------|--------------|-----------|--------|--------------------------------------------------------------------------------------------------------------------------------------------------------------------------------------------------------------------------------------------------------------------------------------------------------------------------------------------------------------------------|---------|-------|-----|-----|----|----|----|----|----|----|----|----|----|---|-------------|-----|---------|
| ARL2_HUMAN        | 5NT3A_HUMAN  | NT5C3A    | Q9H0P0 | Cytosolic 5'-nucleotidase 3A (EC 3.1.3.5) (Cytosolic 5'-nucleotidase 3) (Cytosolic 5'-nucleotidase III) (cN-III) (Pyrimidine 5'-nucleotidase 1) (P5'-N-1) (P5N-1) (PN-1) (Uridine 5'-monophosphate hydrolase 1) (p36)                                                                                                                                                    | 38 kDa  | 0.22  | 13  | 8   | 5  | 1  | 0  | 0  | 7  | 0  | 4  | 1  | 0  | - | 1.321933024 | 0%  | (0.37)  |
| B2RAN1_HUMAN (+4) | SE1L1_HUMAN  | SEL1L     | Q9UBV2 | Protein sel-1 homolog 1 (Suppressor of lin-12-like protein 1) (Sel-1L)                                                                                                                                                                                                                                                                                                   | 89 kDa  | 0.087 | 13  | 8   | 5  | 3  | 2  | 2  | 1  | 1  | 1  | 2  | 1  | - | 1.321933024 | 0%  | (0.37)  |
| ACDSB_HUMAN (+1)  | L0R6Q1_HUMAN | SLC35A4   | L0R6Q1 | Alternative protein SLC35A4                                                                                                                                                                                                                                                                                                                                              | 11 kDa  | 0.076 | 14  | 8   | 5  | 2  | 1  | 4  | 1  | 2  | 1  | 2  | 1  | - | 1.321933024 | 0%  | (0.37)  |
| A4D198_HUMAN      | A4D198_HUMAN | LOC392647 | A4D198 | Similar to mKIAA0038 protein                                                                                                                                                                                                                                                                                                                                             | 33 kDa  | 0.092 | 13  | 8   | 5  | 0  | 5  | 3  | 0  | 2  | 1  | 2  | 0  | - | 1.321933024 | 0%  | (0.37)  |
| K2013_HUMAN       | A8K644_HUMAN | SFRS4     | A8K644 | Splicing factor, arginine/serine-rich 4, isoform CRA_b (cDNA FLJ76859, highly similar to Homo sapiens splicing factor, arginine/serine-rich 4 (SFRS4), mRNA)                                                                                                                                                                                                             | 57 kDa  | 0.047 | 13  | 8   | 5  | 0  | 3  | 4  | 0  | 0  | 0  | 3  | 0  | - | 1.321933024 | 0%  | (0.37)  |
| LARP7_HUMAN       | B2R888_HUMAN |           | B2R888 | Monocyte differentiation antigen CD14 (Myeloid cell-specific leucine-rich glycoprotein)                                                                                                                                                                                                                                                                                  | 40 kDa  | 0.057 | 147 | 88  | 59 | 17 | 24 | 28 | 19 | 0  | 22 | 22 | 15 | - | 1.323451605 | 0%  | (0.054) |
| RT05_HUMAN        | RAB2A_HUMAN  | RAB2A     | P61019 | Ras-related protein Rab-2A                                                                                                                                                                                                                                                                                                                                               | 24 kDa  | 0.1   | 212 | 128 | 86 | 35 | 23 | 33 | 36 | 19 | 22 | 26 | 19 | - | 1.323660653 | 95% | (0.025) |
| KPRA_HUMAN        | B4DSE2_HUMAN |           | B4DSE2 | cDNA FLJ57277, highly similar to Tripeptidyl-peptidase 1 (EC 3.4.14.9)                                                                                                                                                                                                                                                                                                   | 42 kDa  | 0.07  | 85  | 51  | 34 | 6  | 15 | 19 | 11 | 1  | 2  | 15 | 16 | - | 1.324139413 | 0%  | (0.12)  |
| B9EIS5_HUMAN (+5) | STRN_HUMAN   | STRN      | O43815 | Striatin                                                                                                                                                                                                                                                                                                                                                                 | 86 kDa  | 0.01  | 18  | 11  | 7  | 2  | 3  | 3  | 3  | 3  | 2  | 0  | 2  | - | 1.326276647 | 0%  | (0.32)  |
| RBM10_HUMAN       | B4DJV9_HUMAN |           | B4DJV9 | cDNA FLJ60607, highly similar to Acyl-protein thioesterase 1 (EC 3.1.2.-)                                                                                                                                                                                                                                                                                                | 28 kDa  | 0.031 | 18  | 11  | 7  | 1  | 3  | 2  | 5  | 2  | 2  | 2  | 1  | - | 1.326276647 | 0%  | (0.32)  |
| PARN_HUMAN        | ARF6_HUMAN   | ARF6      | P62330 | ADP-ribosylation factor 6                                                                                                                                                                                                                                                                                                                                                | 20 kDa  | 0.039 | 18  | 11  | 7  | 0  | 2  | 2  | 7  | 1  | 4  | 2  | 0  | - | 1.326276647 | 0%  | (0.32)  |
| E7EVA0_HUMAN      | SSRP1_HUMAN  | SSRP1     | Q08945 | FACT complex subunit SSRP1 (Chromatin-specific transcription elongation factor 80 kDa subunit) (Facilitates chromatin transcription complex 80 kDa subunit) (FACT 80 kDa subunit) (FACTp80) (Facilitates chromatin transcription complex subunit SSRP1) (Recombination signal sequence recognition protein 1) (Structure-specific recognition protein 1) (hSSRP1) (T160) | 81 kDa  | 0.017 | 102 | 60  | 40 | 12 | 16 | 14 | 18 | 24 | 4  | 6  | 6  | - | 1.326482211 | 0%  | (0.094) |
| A8K2S7_HUMAN (+1) | B2R5M8_HUMAN |           | B2R5M8 | Isocitrate dehydrogenase [NADP] (EC 1.1.1.42)                                                                                                                                                                                                                                                                                                                            | 47 kDa  | 0.12  | 100 | 60  | 40 | 9  | 17 | 17 | 19 | 3  | 20 | 10 | 7  | - | 1.326482211 | 0%  | (0.094) |
| WDR3_HUMAN        | PRDX4_HUMAN  | PRDX4     | Q13162 | Peroxisomal oxidoreductin-4 (EC 1.1.1.15) (Antioxidant enzyme AOE372) (AOE37-2) (Peroxisomal oxidoreductin IV) (Prx-IV) (Thioredoxin peroxidase AO372) (Thioredoxin-dependent peroxide reductase AO372)                                                                                                                                                                  | 31 kDa  | 0.04  | 100 | 60  | 40 | 11 | 20 | 16 | 12 | 4  | 13 | 10 | 13 | - | 1.326482211 | 0%  | (0.094) |
| UFSP2_HUMAN       | RTN4_HUMAN   | RTN4      | Q9NQC3 | Reticulon-4 (Focren) (Neurite outgrowth inhibitor) (Nogo protein) (Neuroendocrine-specific protein) (NSP) (Neuroendocrine-specific protein C homolog) (RTN-x) (Reticulon-5)                                                                                                                                                                                              | 130 kDa | 0.12  | 115 | 69  | 46 | 39 | 10 | 12 | 10 | 6  | 16 | 7  | 17 | - | 1.328240013 | 0%  | (0.076) |
| CD2A1_HUMAN (+1)  | COX6C_HUMAN  | COX6C     | P09669 | Cytochrome c oxidase subunit 6C (Cytochrome c oxidase polypeptide VIc)                                                                                                                                                                                                                                                                                                   | 9 kDa   | 0.26  | 23  | 14  | 9  | 2  | 2  | 2  | 8  | 4  | 4  | 2  | 1  | - | 1.328930311 | 0%  | (0.29)  |

|                   |              |           |        |                                                                                                                                                                               |         |       |     |    |    |    |    |    |    |    |    |    |    |   |             |             |
|-------------------|--------------|-----------|--------|-------------------------------------------------------------------------------------------------------------------------------------------------------------------------------|---------|-------|-----|----|----|----|----|----|----|----|----|----|----|---|-------------|-------------|
| H11_HUMAN         | E7EVQ6_HUMAN | SQLE      | E7EVQ6 | Squalene monooxygenase                                                                                                                                                        | 53 kDa  | 0.21  | 23  | 14 | 9  | 0  | 6  | 5  | 3  | 6  | 1  | 2  | 0  | - | 1.328930311 | 0% (0.29)   |
| DECR2_HUMAN (+1)  | B4DLN7_HUMAN |           | B4DLN7 | cDNA FLJ59248, highly similar to Homo sapiens cytochrome P450, family 20, subfamily A, polypeptide 1, transcript variant 1, mRNA                                              | 53 kDa  | 0.11  | 23  | 14 | 9  | 5  | 5  | 1  | 3  | 0  | 3  | 2  | 4  | - | 1.328930311 | 0% (0.29)   |
| B3KXX5_HUMAN (+2) | A8K6H9_HUMAN |           | A8K6H9 | cDNA FLJ75876, highly similar to Homo sapiens solute carrier family 38, member 2 (SLC38A2), mRNA                                                                              | 56 kDa  | 0.021 | 23  | 14 | 9  | 4  | 5  | 5  | 0  | 6  | 0  | 3  | 0  | - | 1.328930311 | 0% (0.29)   |
| B7ZKM8_HUMAN (+1) | TOP1_HUMAN   | TOP1      | P11387 | DNA topoisomerase I (EC 5.99.1.2) (DNA topoisomerase I)                                                                                                                       | 91 kDa  | 0.03  | 27  | 17 | 11 | 2  | 4  | 5  | 6  | 4  | 4  | 1  | 2  | - | 1.330721751 | 0% (0.26)   |
| TM245_HUMAN       | RM13_HUMAN   | MRPL13    | Q9BYD1 | 39S ribosomal protein L13, mitochondrial (L13mt) (MRP-L13)                                                                                                                    | 21 kDa  | 0.04  | 28  | 17 | 11 | 5  | 3  | 4  | 5  | 2  | 1  | 4  | 4  | - | 1.330721751 | 0% (0.26)   |
| B7WP27_HUMAN (+1) | J3QLR8_HUMAN | MRPS23    | J3QLR8 | 28S ribosomal protein S23, mitochondrial                                                                                                                                      | 18 kDa  | 0.026 | 28  | 17 | 11 | 7  | 3  | 3  | 4  | 5  | 0  | 2  | 4  | - | 1.330721751 | 0% (0.26)   |
| SRP14_HUMAN       | HXK3_HUMAN   | HK3       | P52790 | Hexokinase-3 (EC 2.7.1.1) (Hexokinase type III) (HK III)                                                                                                                      | 99 kDa  | 0.27  | 28  | 17 | 11 | 0  | 4  | 10 | 2  | 0  | 3  | 3  | 5  | - | 1.330721751 | 0% (0.26)   |
| B4DLE7_HUMAN (+2) | MA2A1_HUMAN  | MAN2A1    | Q16706 | Alpha-mannosidase 2 (EC 3.2.1.114) (Golgi alpha-mannosidase II) (AMan II) (Man II) (Mannosidase alpha class 2A member 1) (Mannosyl-oligosaccharide 1,3-1,6-alpha-mannosidase) | 131 kDa | 0.097 | 33  | 20 | 13 | 6  | 7  | 4  | 3  | 0  | 3  | 5  | 5  | - | 1.332014008 | 0% (0.24)   |
| B3KY30_HUMAN (+3) | MOT4_HUMAN   | SLC16A3   | O15427 | Monocarboxylate transporter 4 (MCT 4) (Solute carrier family 16 member 3)                                                                                                     | 49 kDa  | 0.14  | 33  | 20 | 13 | 3  | 8  | 5  | 4  | 2  | 2  | 3  | 6  | - | 1.332014008 | 0% (0.24)   |
| Q59G24_HUMAN (+1) | B7ZSZ2_HUMAN | RRAS2     | B7ZSZ2 | Ras-related protein R-Ras2 (cDNA FLJ61162, highly similar to Ras-related protein R-Ras2)                                                                                      | 24 kDa  | 0.25  | 33  | 20 | 13 | 11 | 4  | 4  | 0  | 2  | 0  | 6  | 4  | - | 1.332014008 | 0% (0.24)   |
| B5BU32_HUMAN (+5) | RL36_HUMAN   | RPL36     | Q9Y3U8 | 60S ribosomal protein L36                                                                                                                                                     | 12 kDa  | 0.24  | 38  | 23 | 15 | 6  | 5  | 3  | 9  | 4  | 4  | 3  | 4  | - | 1.332991398 | 0% (0.22)   |
| ECHD1_HUMAN       | CNPY2_HUMAN  | CNPY2     | Q9Y2B0 | Protein canopy homolog 2 (MIR-interacting saposin-like protein) (Putative secreted protein Zsig9) (Transmembrane protein 4)                                                   | 21 kDa  | 0.098 | 63  | 38 | 25 | 6  | 7  | 14 | 11 | 4  | 10 | 6  | 5  | - | 1.335674277 | 0% (0.15)   |
| B7ZLZ2_HUMAN (+1) | B4DW81_HUMAN |           | B4DW81 | cDNA FLJ58863, highly similar to Protein NipSnap3A                                                                                                                            | 26 kDa  | 0.06  | 67  | 41 | 27 | 5  | 13 | 14 | 9  | 10 | 6  | 3  | 9  | - | 1.335988497 | 0% (0.14)   |
| VPS16_HUMAN       | H2A2B_HUMAN  | HIST2H2AB | Q8IUE6 | Histone H2A type 2-B                                                                                                                                                          | 14 kDa  | 0.052 | 136 | 82 | 54 | 14 | 0  | 24 | 28 | 20 | 0  | 7  | 17 | - | 1.346190735 | 0% (0.050)  |
| B4DQW0_HUMAN (+1) | DRA_HUMAN    | HLA-DRA   | P01903 | HLA class II histocompatibility antigen, DR alpha chain (MHC class II antigen DRA)                                                                                            | 29 kDa  | 0.15  | 111 | 67 | 44 | 13 | 20 | 17 | 17 | 8  | 7  | 11 | 18 | - | 1.347464861 | 0% (0.070)  |
| CBX5_HUMAN        | B4DRS6_HUMAN |           | B4DRS6 | cDNA FLJ58980, highly similar to Sideroflexin-3                                                                                                                               | 36 kDa  | 0.36  | 82  | 49 | 32 | 16 | 8  | 9  | 16 | 1  | 8  | 6  | 17 | - | 1.350057572 | 0% (0.10)   |
| B7Z5X7_HUMAN      | CLIC1_HUMAN  | CLIC1     | O00299 | Chloride intracellular channel protein 1 (Chloride channel ABP) (Nuclear chloride ion channel 27) (NCC27) (Regulatory nuclear chloride ion channel protein) (hRNCC)           | 27 kDa  | 0.12  | 72  | 43 | 28 | 6  | 11 | 8  | 18 | 4  | 11 | 9  | 4  | - | 1.351408911 | 0% (0.12)   |
| RUFY1_HUMAN       | VATB2_HUMAN  | ATP6V1B2  | P21281 | V-type proton ATPase subunit B, brain isoform (V-ATPase subunit B 2) (Endomembrane proton pump 58 kDa subunit) (HO57) (Vacuolar proton pump subunit B 2)                      | 57 kDa  | 0.031 | 164 | 99 | 65 | 19 | 29 | 30 | 22 | 9  | 11 | 24 | 21 | - | 1.352008198 | 95% (0.033) |
| A8MQB8_HUMAN      | A8K3M9_HUMAN |           | A8K3M9 | cDNA FLJ76387, highly similar to Homo sapiens splicing factor, arginine/serine-rich 9 (SFRS9), mRNA                                                                           | 26 kDa  | 0.07  | 47  | 28 | 18 | 5  | 5  | 6  | 11 | 6  | 2  | 5  | 5  | - | 1.357291933 | 0% (0.18)   |
| GCP60_HUMAN       | B4DLV7_HUMAN |           | B4DLV7 | cDNA FLJ60299, highly similar to Rab GDP dissociation inhibitor beta                                                                                                          | 51 kDa  | 0.045 | 104 | 63 | 41 | 12 | 17 | 18 | 16 | 13 | 6  | 13 | 10 | - | 1.358551826 | 0% (0.071)  |

|                   |              |         |        |                                                                                                                                                                                                                                                    |         |       |     |     |     |    |    |    |     |    |    |    |    |   |             |               |
|-------------------|--------------|---------|--------|----------------------------------------------------------------------------------------------------------------------------------------------------------------------------------------------------------------------------------------------------|---------|-------|-----|-----|-----|----|----|----|-----|----|----|----|----|---|-------------|---------------|
| 68MP_HUMAN (+1)   | GNAI3_HUMAN  | GNAI3   | P08754 | Guanine nucleotide-binding protein G(k) subunit alpha (G(i) alpha-3)                                                                                                                                                                               | 41 kDa  | 0.33  | 103 | 63  | 41  | 18 | 16 | 17 | 12  | 9  | 7  | 12 | 12 | - | 1.358551826 | 0% (0.071)    |
| ACS2L_HUMAN (+1)  | ZNT7_HUMAN   | SLC30A7 | Q8NEW0 | Zinc transporter 7 (ZnT-7) (Solute carrier family 30 member 7) (Zn-like transporter 2)                                                                                                                                                             | 42 kDa  | 0.073 | 41  | 25  | 16  | 10 | 5  | 3  | 7   | 7  | 4  | 3  | 2  | - | 1.359296166 | 0% (0.19)     |
| MCTS1_HUMAN       | ITPR2_HUMAN  | ITPR2   | Q14571 | Inositol 1,4,5-trisphosphate receptor type 2 (IP3 receptor isoform 2) (IP3R 2) (InsP3R2) (Type 2 inositol 1,4,5-trisphosphate receptor) (Type 2 InsP3 receptor)                                                                                    | 308 kDa | 0.2   | 41  | 25  | 16  | 12 | 6  | 6  | 1   | 1  | 2  | 6  | 7  | - | 1.359296166 | 0% (0.19)     |
| OGT1_HUMAN        | C9JV86_HUMAN | CD63    | C9JV86 | CD63 antigen                                                                                                                                                                                                                                       | 25 kDa  | 0.046 | 36  | 22  | 14  | 6  | 7  | 8  | 1   | 2  | 5  | 3  | 4  | - | 1.361829538 | 0% (0.21)     |
| C9JZ87_HUMAN (+2) | BASL_HUMAN   | BSG     | P35613 | Basigin (5F7) (Collagenase stimulatory factor) (Extracellular matrix metalloproteinase inducer) (EMMPRIN) (Leukocyte activation antigen M6) (OK blood group antigen) (Tumor cell-derived collagenase stimulatory factor) (TCSF) (CD antigen CD147) | 42 kDa  | 0.28  | 36  | 22  | 14  | 5  | 7  | 8  | 2   | 4  | 3  | 5  | 2  | - | 1.361829538 | 0% (0.21)     |
| D6RGZ2_HUMAN (+2) | RS26_HUMAN   | RPS26   | P62854 | 40S ribosomal protein S26                                                                                                                                                                                                                          | 13 kDa  | 0.18  | 36  | 22  | 14  | 6  | 5  | 4  | 7   | 5  | 5  | 2  | 3  | - | 1.361829538 | 0% (0.21)     |
| UBP10_HUMAN       | DESP_HUMAN   | DSP     | P15924 | Desmoplakin (DP) (250/210 kDa paraneoplastic pemphigus antigen)                                                                                                                                                                                    | 332 kDa | 0.049 | 176 | 106 | 69  | 26 | 29 | 28 | 24  | 25 | 17 | 14 | 17 | - | 1.364099016 | 95% (0.025)   |
| SNTC_HUMAN (+2)   | A8YXX5_HUMAN | PIG60   | A8YXX5 | Cell proliferation-inducing protein 60 (cDNA FLJ12721 fis, clone NT2RP1001310, highly similar to Mitochondrial carrier homolog 1)                                                                                                                  | 38 kDa  | 0.075 | 31  | 19  | 12  | 7  | 4  | 3  | 5   | 5  | 2  | 3  | 2  | - | 1.365131659 | 0% (0.23)     |
| PNKD_HUMAN        | F8RZC1_HUMAN | ND4     | F8RZC1 | NADH-ubiquinone oxidoreductase chain 4 (EC 1.6.5.3)                                                                                                                                                                                                | 52 kDa  | 0.11  | 31  | 19  | 12  | 8  | 4  | 3  | 4   | 5  | 2  | 3  | 2  | - | 1.365131659 | 0% (0.23)     |
| A8K5C2_HUMAN (+1) | H0YF29_HUMAN | C8orf82 | H0YF29 | UPF0598 protein C8orf82 (Fragment)                                                                                                                                                                                                                 | 29 kDa  | 0.083 | 31  | 19  | 12  | 3  | 6  | 4  | 6   | 4  | 3  | 2  | 3  | - | 1.365131659 | 0% (0.23)     |
| RDH11_HUMAN       | B2R5B3_HUMAN |         | B2R5B3 | Histone H2A                                                                                                                                                                                                                                        | 14 kDa  | 0.17  | 553 | 334 | 218 | 66 | 71 | 91 | 107 | 78 | 47 | 34 | 61 | - | 1.367310501 | 95% (0.00019) |
| B7ZKT9_HUMAN      | B4DTE8_HUMAN | PLSCR1  | B4DTE8 | Phospholipid scramblase 1 (cDNA FLJ57588, highly similar to Phospholipid scramblase 1)                                                                                                                                                             | 27 kDa  | 0.055 | 27  | 16  | 10  | 7  | 5  | 3  | 3   | 5  | 1  | 2  | 3  | - | 1.369612527 | 0% (0.25)     |
| CB054_HUMAN       | VIGLN_HUMAN  | HDLBP   | Q00341 | Vigilin (High density lipoprotein-binding protein) (HDL-binding protein)                                                                                                                                                                           | 141 kDa | 0.11  | 26  | 16  | 10  | 0  | 5  | 11 | 1   | 0  | 1  | 9  | 0  | - | 1.369612527 | 0% (0.25)     |
| MYO5C_HUMAN       | ADA10_HUMAN  | ADAM10  | O14672 | Disintegrin and metalloproteinase domain-containing protein 10 (ADAM 10) (EC 3.4.24.81) (CDw156) (Kuzbanian protein homolog) (Mammalian disintegrin-metalloprotease) (CD antigen CD156c)                                                           | 84 kDa  | 0.038 | 26  | 16  | 10  | 8  | 3  | 4  | 1   | 3  | 0  | 4  | 3  | - | 1.369612527 | 0% (0.25)     |
| PXMP2_HUMAN       | PSMD8_HUMAN  | PSMD8   | P48556 | 26S proteasome non-ATPase regulatory subunit 8 (26S proteasome regulatory subunit RPN12) (26S proteasome regulatory subunit S14) (p31)                                                                                                             | 40 kDa  | 0.14  | 26  | 16  | 10  | 2  | 3  | 3  | 8   | 2  | 5  | 2  | 1  | - | 1.369612527 | 0% (0.25)     |
| TPPC3_HUMAN       | MYO1B_HUMAN  | MYO1B   | O43795 | Unconventional myosin-Ib (MYH-1c) (Myosin I alpha) (MIM1-alpha) (MMIa)                                                                                                                                                                             | 132 kDa | 0.12  | 25  | 16  | 10  | 0  | 6  | 9  | 0   | 0  | 0  | 6  | 4  | - | 1.369612527 | 0% (0.25)     |
| NELFB_HUMAN       | A8K2Y2_HUMAN |         | A8K2Y2 | cDNA FLJ78120, highly similar to Homo sapiens eukaryotic translation initiation factor 2, subunit 3 gamma, 52kDa (EIF2S3), mRNA                                                                                                                    | 51 kDa  | 0.043 | 26  | 16  | 10  | 2  | 4  | 6  | 4   | 2  | 8  | 0  | 0  | - | 1.369612527 | 0% (0.25)     |
| B7Z1C5_HUMAN (+1) | A8K0F7_HUMAN |         | A8K0F7 | cDNA FLJ76587, highly similar to Homo sapiens vitamin K epoxide reductase                                                                                                                                                                          | 20 kDa  | 0.074 | 26  | 16  | 10  | 5  | 4  | 3  | 4   | 2  | 3  | 2  | 3  | - | 1.369612527 | 0% (0.25)     |

|                    |              |        |        |                                                                                                                                                                                                                                                                 |        |       |     |     |    |    |    |    |    |    |    |    |    |   |             |             |
|--------------------|--------------|--------|--------|-----------------------------------------------------------------------------------------------------------------------------------------------------------------------------------------------------------------------------------------------------------------|--------|-------|-----|-----|----|----|----|----|----|----|----|----|----|---|-------------|-------------|
|                    |              |        |        | complex, subunit 1-like 1 (VKORC1L1), mRNA                                                                                                                                                                                                                      |        |       |     |     |    |    |    |    |    |    |    |    |    |   |             |             |
| B1AJY5_HUMAN (+2)  | RM39_HUMAN   | MRPL39 | Q9NYK5 | 39S ribosomal protein L39, mitochondrial (L39mt) (MRP-L39) (39S ribosomal protein L5, mitochondrial) (L5mt) (MRP-L5)                                                                                                                                            | 39 kDa | 0.097 | 25  | 16  | 10 | 7  | 5  | 4  | 0  | 4  | 1  | 3  | 2  | - | 1.369612527 | 0% (0.25)   |
| B4DMJ9_HUMAN       | Q9BWC7_HUMAN | COMT   | Q9BWC7 | COMT protein                                                                                                                                                                                                                                                    | 20 kDa | 0.18  | 58  | 36  | 23 | 11 | 9  | 6  | 10 | 6  | 6  | 6  | 5  | - | 1.372164177 | 0% (0.13)   |
| H0UI80_HUMAN (+1)  | B2R6N9_HUMAN |        | B2R6N9 | cDNA, FLJ93042, highly similar to Homo sapiens signal sequence receptor, alpha (translocon-associated protein alpha) (SSR1), mRNA                                                                                                                               | 32 kDa | 0.083 | 59  | 36  | 23 | 10 | 9  | 5  | 12 | 7  | 6  | 4  | 6  | - | 1.372164177 | 0% (0.13)   |
| KPCD_HUMAN         | F6IQV5_HUMAN | HLA-A  | F6IQV5 | MHC class I antigen (Fragment)                                                                                                                                                                                                                                  | 38 kDa | 0.065 | 87  | 53  | 34 | 0  | 0  | 12 | 22 | 0  | 0  | 0  | 13 | - | 1.374859527 | 0% (0.082)  |
| PSA2_HUMAN         | M4QNU4_HUMAN | HLA-A  | M4QNU4 | MHC class I antigen (Fragment)                                                                                                                                                                                                                                  | 32 kDa | 0.18  | 87  | 53  | 34 | 0  | 0  | 12 | 22 | 3  | 0  | 0  | 0  | - | 1.374859527 | 0% (0.082)  |
| B3GA3_HUMAN (+1)   | H0Y368_HUMAN | DPM1   | H0Y368 | Dolichol-phosphate mannosyltransferase (Fragment)                                                                                                                                                                                                               | 33 kDa | 0.099 | 54  | 33  | 21 | 13 | 5  | 6  | 9  | 5  | 5  | 4  | 7  | - | 1.375047988 | 0% (0.14)   |
| Q32Q10_HUMAN (+1)  | ISG15_HUMAN  | ISG15  | P05161 | Ubiquitin-like protein ISG15 (Interferon-induced 15 kDa protein) (Interferon-induced 17 kDa protein) (IP17) (Ubiquitin cross-reactive protein) (hUCRP)                                                                                                          | 18 kDa | 0.093 | 20  | 13  | 8  | 0  | 0  | 0  | 13 | 3  | 4  | 2  | 0  | - | 1.376036734 | 0% (0.27)   |
| MBD2_HUMAN         | H3BV80_HUMAN | RNPS1  | H3BV80 | RNA-binding protein with serine-rich domain 1                                                                                                                                                                                                                   | 25 kDa | 0.068 | 21  | 13  | 8  | 4  | 4  | 2  | 3  | 2  | 2  | 1  | 3  | - | 1.376036734 | 0% (0.27)   |
| SCFD2_HUMAN        | SURF1_HUMAN  | SURF1  | Q15526 | Surfeit locus protein 1                                                                                                                                                                                                                                         | 33 kDa | 0.045 | 21  | 13  | 8  | 4  | 2  | 1  | 6  | 2  | 1  | 2  | 3  | - | 1.376036734 | 0% (0.27)   |
| B7Z5Z2_HUMAN (+1)  | CPT2_HUMAN   | CPT2   | P23786 | Carnitine O-palmitoyltransferase 2, mitochondrial (EC 2.3.1.21) (Carnitine palmitoyltransferase II) (CPT II)                                                                                                                                                    | 74 kDa | 0.26  | 81  | 50  | 32 | 13 | 19 | 10 | 9  | 12 | 4  | 7  | 8  | - | 1.376942092 | 0% (0.088)  |
| COQ9_HUMAN         | SAC1_HUMAN   | SACM1L | Q9NTJ5 | Phosphatidylinositol phosphatase SAC1 (EC 3.1.3.-) (Suppressor of actin mutations 1-like protein)                                                                                                                                                               | 67 kDa | 0.14  | 51  | 30  | 19 | 19 | 3  | 6  | 2  | 2  | 5  | 5  | 6  | - | 1.378504031 | 0% (0.15)   |
| NPA1P_HUMAN        | VAT1_HUMAN   | VAT1   | Q99536 | Synaptic vesicle membrane protein VAT-1 homolog (EC 1.-.-)                                                                                                                                                                                                      | 42 kDa | 0.012 | 77  | 47  | 30 | 16 | 10 | 15 | 6  | 5  | 7  | 5  | 13 | - | 1.379292905 | 0% (0.094)  |
| TF3C4_HUMAN        | M0R210_HUMAN | RPS16  | M0R210 | 40S ribosomal protein S16 (Ribosomal protein S16, isoform CRA_a)                                                                                                                                                                                                | 14 kDa | 0.032 | 76  | 47  | 30 | 10 | 12 | 12 | 13 | 13 | 10 | 3  | 4  | - | 1.379292905 | 0% (0.094)  |
| VPS18_HUMAN        | ERO1A_HUMAN  | ERO1L  | Q96HE7 | ERO1-like protein alpha (ERO1-L) (ERO1-L-alpha) (EC 1.8.4.-) (Endoplasmic oxidoreductin-1-like protein) (Oxidoreductin-1-L-alpha)                                                                                                                               | 54 kDa | 0.033 | 182 | 112 | 72 | 29 | 35 | 31 | 17 | 6  | 29 | 13 | 25 | - | 1.381466221 | 95% (0.018) |
| A8K8J9_HUMAN       | ARPC2_HUMAN  | ARPC2  | O15144 | Actin-related protein 2/3 complex subunit 2 (Arp2/3 complex 34 kDa subunit) (p34-ARC)                                                                                                                                                                           | 34 kDa | 0.11  | 67  | 41  | 26 | 8  | 9  | 13 | 12 | 8  | 10 | 3  | 5  | - | 1.385035529 | 0% (0.11)   |
| EXOSX_HUMAN        | B3KU62_HUMAN |        | B3KU62 | cDNA FLJ39243 fis, clone OCBBF2008283, highly similar to Protein NDRG1                                                                                                                                                                                          | 39 kDa | 0.035 | 67  | 41  | 26 | 5  | 11 | 13 | 12 | 9  | 2  | 12 | 3  | - | 1.385035529 | 0% (0.11)   |
| C9JTZ6_HUMAN (+2)  | F5H1S9_HUMAN | PUS1   | F5H1S9 | tRNA pseudouridine synthase (EC 5.4.99.-)                                                                                                                                                                                                                       | 42 kDa | 0.075 | 16  | 10  | 6  | 2  | 3  | 3  | 2  | 2  | 0  | 1  | 3  | - | 1.386012559 | 0% (0.30)   |
| TMI92_HUMAN        | ACSF3_HUMAN  | ACSF3  | Q4G176 | Acyl-CoA synthetase family member 3, mitochondrial (EC 6.2.1.-)                                                                                                                                                                                                 | 64 kDa | 0.15  | 16  | 10  | 6  | 5  | 2  | 2  | 1  | 2  | 0  | 0  | 4  | - | 1.386012559 | 0% (0.30)   |
| D3DNDQ1_HUMAN (+1) | IFIT3_HUMAN  | IFIT3  | O14879 | Interferon-induced protein with tetratricopeptide repeats 3 (IFIT-3) (CIG49) (ISG-60) (Interferon-induced 60 kDa protein) (IFI-60K) (Interferon-induced protein with tetratricopeptide repeats 4) (IFIT-4) (Retinoic acid-induced gene G protein) (P60) (RIG-G) | 56 kDa | 0.075 | 16  | 10  | 6  | 0  | 0  | 0  | 10 | 0  | 6  | 0  | 0  | - | 1.386012559 | 0% (0.30)   |

|                   |              |          |        |                                                                                                                                                                                                                                                                                                                                                                                                                                                                                                                                                                                                                                                                                                                |         |       |     |     |     |     |     |     |     |     |    |    |    |             |                |
|-------------------|--------------|----------|--------|----------------------------------------------------------------------------------------------------------------------------------------------------------------------------------------------------------------------------------------------------------------------------------------------------------------------------------------------------------------------------------------------------------------------------------------------------------------------------------------------------------------------------------------------------------------------------------------------------------------------------------------------------------------------------------------------------------------|---------|-------|-----|-----|-----|-----|-----|-----|-----|-----|----|----|----|-------------|----------------|
| EI2BA_HUMAN       | H0YKW5_HUMAN | C15orf48 | H0YKW5 | Normal mucosa of esophagus-specific gene 1 protein (Fragment)                                                                                                                                                                                                                                                                                                                                                                                                                                                                                                                                                                                                                                                  | 15 kDa  | 0.13  | 40  | 24  | 15  | 9   | 8   | 4   | 5   | 0   | 4  | 5  | 6  | -           | 0%             |
|                   |              |          |        |                                                                                                                                                                                                                                                                                                                                                                                                                                                                                                                                                                                                                                                                                                                |         |       |     |     |     |     |     |     |     |     |    |    |    | 1.387977953 | (0.18)         |
| PSA1_HUMAN        | B4DM33_HUMAN |          | B4DM33 | cDNA FLJ52068, highly similar to Microtubule-associated protein RP/EB family member 1                                                                                                                                                                                                                                                                                                                                                                                                                                                                                                                                                                                                                          | 27 kDa  | 0.13  | 40  | 24  | 15  | 0   | 11  | 10  | 3   | 6   | 2  | 4  | 4  | -           | 0%             |
|                   |              |          |        |                                                                                                                                                                                                                                                                                                                                                                                                                                                                                                                                                                                                                                                                                                                |         |       |     |     |     |     |     |     |     |     |    |    |    | 1.387977953 | (0.18)         |
| B3KRM8_HUMAN (+4) | H4_HUMAN     | HIST1H4A | P62805 | Histone H4                                                                                                                                                                                                                                                                                                                                                                                                                                                                                                                                                                                                                                                                                                     | 11 kDa  | 0.083 | 786 | 484 | 311 | 107 | 101 | 107 | 175 | 110 | 72 | 60 | 70 | -           | 95% (<0.00010) |
|                   |              |          |        |                                                                                                                                                                                                                                                                                                                                                                                                                                                                                                                                                                                                                                                                                                                |         |       |     |     |     |     |     |     |     |     |    |    |    | 1.39046238  |                |
| B4DZP4_HUMAN (+1) | AP2A2_HUMAN  | AP2A2    | O94973 | AP-2 complex subunit alpha-2 (100 kDa coated vesicle protein C) (Adapter-related protein complex 2 subunit alpha-2) (Adaptor protein complex AP-2 subunit alpha-2) (Alpha-adaptin C) (Alpha2-adaptin) (Clathrin assembly protein complex 2 alpha-C large chain) (Huntingtin partner J) (Huntingtin-interacting protein 9) (HIP-9) (Huntingtin-interacting protein J) (Plasma membrane adaptor HA2/AP2 adaptin alpha C subunit)                                                                                                                                                                                                                                                                                 | 104 kDa | 0.14  | 104 | 63  | 40  | 14  | 20  | 15  | 13  | 6   | 11 | 13 | 9  | -           | 0%             |
|                   |              |          |        |                                                                                                                                                                                                                                                                                                                                                                                                                                                                                                                                                                                                                                                                                                                |         |       |     |     |     |     |     |     |     |     |    |    |    | 1.391506443 | (0.057)        |
| CAYP1_HUMAN (+3)  | BLVRB_HUMAN  | BLVRB    | P30043 | Flavin reductase (NADPH) (FR) (EC 1.5.1.30) (Biliverdin reductase B) (BVR-B) (EC 1.3.1.24) (Biliverdin-IX beta-reductase) (Green heme-binding protein) (GHBP) (NADPH-dependent diaphorase) (NADPH-flavin reductase) (FLR)                                                                                                                                                                                                                                                                                                                                                                                                                                                                                      | 22 kDa  | 0.32  | 34  | 21  | 13  | 0   | 4   | 4   | 13  | 1   | 6  | 4  | 2  | -           | 0%             |
|                   |              |          |        |                                                                                                                                                                                                                                                                                                                                                                                                                                                                                                                                                                                                                                                                                                                |         |       |     |     |     |     |     |     |     |     |    |    |    | 1.394714944 | (0.20)         |
| HIP1_HUMAN        | A4_HUMAN     | APP      | P05067 | Amyloid beta A4 protein (ABPP) (APPI) (APP) (Alzheimer disease amyloid protein) (Cerebral vascular amyloid peptide) (CVAP) (PreA4) (Protease nexin-II) (PN-II) [Cleaved into: N-APP; Soluble APP-alpha (S-APP-alpha); Soluble APP-beta (S-APP-beta); C99; Beta-amyloid protein 42 (Beta-APP42); Beta-amyloid protein 40 (Beta-APP40); C83; P3(42); P3(40); C50; Gamma-secretase C-terminal fragment 59 (Amyloid intracellular domain 59) (AICD-59) (AID(59)) (Gamma-CTF(59)); Gamma-secretase C-terminal fragment 57 (Amyloid intracellular domain 57) (AICD-57) (AID(57)) (Gamma-CTF(57)); Gamma-secretase C-terminal fragment 50 (Amyloid intracellular domain 50) (AICD-50) (AID(50)) (Gamma-CTF(50)); C31] | 87 kDa  | 0.039 | 34  | 21  | 13  | 7   | 8   | 6   | 0   | 4   | 0  | 6  | 3  | -           | 0%             |
|                   |              |          |        |                                                                                                                                                                                                                                                                                                                                                                                                                                                                                                                                                                                                                                                                                                                |         |       |     |     |     |     |     |     |     |     |    |    |    | 1.394714944 | (0.20)         |
| E9PSH2_HUMAN      | A8K4Q9_HUMAN |          | A8K4Q9 | cDNA FLJ77931                                                                                                                                                                                                                                                                                                                                                                                                                                                                                                                                                                                                                                                                                                  | 103 kDa | 0.11  | 34  | 21  | 13  | 12  | 3   | 3   | 0   | 0   | 4  | 4  | 5  | -           | 0%             |
|                   |              |          |        |                                                                                                                                                                                                                                                                                                                                                                                                                                                                                                                                                                                                                                                                                                                |         |       |     |     |     |     |     |     |     |     |    |    |    | 1.394714944 | (0.20)         |
| UBE2O_HUMAN       | D3DPU2_HUMAN | CAP1     | D3DPU2 | Adenylyl cyclase-associated protein                                                                                                                                                                                                                                                                                                                                                                                                                                                                                                                                                                                                                                                                            | 52 kDa  | 0.029 | 79  | 46  | 29  | 10  | 11  | 16  | 8   | 9   | 6  | 8  | 6  | -           | 0%             |
|                   |              |          |        |                                                                                                                                                                                                                                                                                                                                                                                                                                                                                                                                                                                                                                                                                                                |         |       |     |     |     |     |     |     |     |     |    |    |    | 1.395360121 | (0.089)        |
| B3KUH3_HUMAN (+2) | B7ZLE5_HUMAN | FN1      | B7ZLE5 | FN1 protein                                                                                                                                                                                                                                                                                                                                                                                                                                                                                                                                                                                                                                                                                                    | 247 kDa | 0.058 | 134 | 82  | 52  | 62  | 2   | 7   | 11  | 4   | 10 | 14 | 25 | -           | 95%            |
|                   |              |          |        |                                                                                                                                                                                                                                                                                                                                                                                                                                                                                                                                                                                                                                                                                                                |         |       |     |     |     |     |     |     |     |     |    |    |    | 1.396792104 | (0.033)        |
| RM24_HUMAN        | MRP1_HUMAN   | ABCC1    | P33527 | Multidrug resistance-associated protein 1 (ATP-binding cassette sub-family C member 1) (Leukotriene C(4) transporter) (LTC4 transporter)                                                                                                                                                                                                                                                                                                                                                                                                                                                                                                                                                                       | 172 kDa | 0.18  | 52  | 32  | 20  | 12  | 6   | 12  | 2   | 3   | 2  | 6  | 9  | -           | 0%             |
|                   |              |          |        |                                                                                                                                                                                                                                                                                                                                                                                                                                                                                                                                                                                                                                                                                                                |         |       |     |     |     |     |     |     |     |     |    |    |    | 1.397721599 | (0.13)         |
| IF6_HUMAN         | LAP2A_HUMAN  | TMPO     | P42166 | Lamina-associated polypeptide 2, isoform alpha (Thymopoietin isoform alpha)                                                                                                                                                                                                                                                                                                                                                                                                                                                                                                                                                                                                                                    | 75 kDa  | 0.16  | 52  | 32  | 20  | 4   | 9   | 12  | 7   | 5   | 0  | 12 | 3  | -           | 0%             |
|                   |              |          |        |                                                                                                                                                                                                                                                                                                                                                                                                                                                                                                                                                                                                                                                                                                                |         |       |     |     |     |     |     |     |     |     |    |    |    | 1.397721599 | (0.13)         |

|                      |                 |           |        |                                                                                                                                                                                                                                                                     |         |        |    |    |    |    |    |    |   |    |   |    |   |   |             |            |
|----------------------|-----------------|-----------|--------|---------------------------------------------------------------------------------------------------------------------------------------------------------------------------------------------------------------------------------------------------------------------|---------|--------|----|----|----|----|----|----|---|----|---|----|---|---|-------------|------------|
|                      |                 |           |        | (TP alpha) (Thymopoietin-related peptide isoform alpha) (TPRP isoform alpha) [Cleaved into: Thymopoietin (TP) (Splenin); Thymopentin (TP5)]                                                                                                                         |         |        |    |    |    |    |    |    |   |    |   |    |   |   |             |            |
| ELMD2_HUMAN          | VAPB_HUMAN      | VAPB      | O95292 | Vesicle-associated membrane protein-associated protein B/C (VAMP-B/VAMP-C) (VAMP-associated protein B/C) (VAMP-B/VAP-C)                                                                                                                                             | 27 kDa  | 0.19   | 52 | 32 | 20 | 11 | 8  | 7  | 6 | 7  | 3 | 6  | 4 | - | 1.397721599 | 0% (0.13)  |
| B2R6A3_HUMAN         | APIB1_HUMAN     | APIB1     | Q10567 | AP-1 complex subunit beta-1 (Adapter-related protein complex 1 subunit beta-1) (Adaptor protein complex AP-1 subunit beta-1) (Beta-1-adaptin) (Beta-adaptin 1) (Clathrin assembly protein complex 1 beta large chain) (Golgi adaptor HA1/API adaptin beta subunit)  | 105 kDa | 0.087  | 88 | 54 | 34 | 12 | 18 | 16 | 8 | 10 | 4 | 13 | 7 | - | 1.400220561 | 0% (0.069) |
| SYFM_HUMAN           | A6GV77_HUMAN    | FACL5     | A6GV77 | Fatty acid coenzyme A ligase 5 (EC 6.2.1.3)                                                                                                                                                                                                                         | 73 kDa  | 0.08   | 11 | 7  | 4  | 3  | 0  | 0  | 5 | 0  | 1 | 1  | 2 | - | 1.403598996 | 0% (0.34)  |
| CLPX_HUMAN           | HEBP1_HUMAN     | HEBP1     | Q9NRV9 | Heme-binding protein 1 (p22HBP)                                                                                                                                                                                                                                     | 21 kDa  | 0.079  | 12 | 7  | 4  | 1  | 2  | 4  | 1 | 1  | 2 | 0  | 2 | - | 1.403598996 | 0% (0.34)  |
| PDE12_HUMAN          | S27A4_HUMAN     | SLC27A4   | Q6P1M0 | Long-chain fatty acid transport protein 4 (FATP-4) (Fatty acid transport protein 4) (EC 6.2.1.-) (Solute carrier family 27 member 4)                                                                                                                                | 72 kDa  | 0.084  | 11 | 7  | 4  | 4  | 0  | 1  | 3 | 0  | 2 | 2  | 0 | - | 1.403598996 | 0% (0.34)  |
| B4E1A5_HUMAN         | A8K4R1_HUMAN    |           | A8K4R1 | cDNA FLJ77420, highly similar to Homo sapiens cancer susceptibility candidate 4 (CASC4), transcript variant 2, mRNA                                                                                                                                                 | 43 kDa  | 0.043  | 11 | 7  | 4  | 1  | 1  | 2  | 3 | 0  | 0 | 1  | 2 | - | 1.403598996 | 0% (0.34)  |
| E7EWW1_HUMAN (+2)    | B3KWE3_HUMAN AN |           | B3KWE3 | cDNA FLJ42859 fis, clone BRHIP2009414, highly similar to Bax inhibitor 1                                                                                                                                                                                            | 27 kDa  | 0.057  | 12 | 7  | 4  | 3  | 2  | 1  | 2 | 0  | 2 | 1  | 1 | - | 1.403598996 | 0% (0.34)  |
| J3KR97_HUMAN N (+1)  | PPAP_HUMAN      | ACPP      | P15309 | Prostatic acid phosphatase (PAP) (EC 3.1.3.2) (5'-nucleotidase) (5'-NT) (EC 3.1.3.5) (Ecto-5'-nucleotidase) (Thiamine monophosphatase) (TMPase) [Cleaved into: PAPI39]                                                                                              | 45 kDa  | 0.059  | 11 | 7  | 4  | 1  | 2  | 3  | 1 | 3  | 0 | 0  | 1 | - | 1.403598996 | 0% (0.34)  |
| B3KW23_HUMAN AN (+4) | NNMT_HUMAN      | NNMT      | P40261 | Nicotinamide N-methyltransferase (EC 2.1.1.1)                                                                                                                                                                                                                       | 30 kDa  | 0.076  | 11 | 7  | 4  | 0  | 4  | 3  | 0 | 2  | 1 | 1  | 0 | - | 1.403598996 | 0% (0.34)  |
| ACAP2_HUMAN N        | RFIP1_HUMAN     | RAB11FIP1 | Q6WKZ4 | Rab11 family-interacting protein 1 (Rab11-FIP1) (Rab-coupling protein)                                                                                                                                                                                              | 137 kDa | 0.033  | 11 | 7  | 4  | 3  | 2  | 2  | 0 | 0  | 1 | 1  | 2 | - | 1.403598996 | 0% (0.34)  |
| EDC4_HUMAN           | B4DQW0_HUMAN AN |           | B4DQW0 | cDNA FLJ51530, highly similar to COMM domain-containing protein 9                                                                                                                                                                                                   | 19 kDa  | 0.036  | 11 | 7  | 4  | 1  | 3  | 0  | 3 | 0  | 3 | 0  | 1 | - | 1.403598996 | 0% (0.34)  |
| GDE_HUMAN            | TPPC3_HUMAN     | TRAPPC3   | O43617 | Trafficking protein particle complex subunit 3 (BET3 homologue)                                                                                                                                                                                                     | 20 kDa  | 0.037  | 11 | 7  | 4  | 3  | 3  | 1  | 0 | 1  | 1 | 1  | 1 | - | 1.403598996 | 0% (0.34)  |
| CENPF_HUMAN N        | KPCD_HUMAN      | PRKCD     | Q05655 | Protein kinase C delta type (EC 2.7.11.13) (Tyrosine-protein kinase PRKCD) (EC 2.7.10.2) (nPKC-delta) [Cleaved into: Protein kinase C delta type regulatory subunit; Protein kinase C delta type catalytic subunit (Sphingosine-dependent protein kinase-1) (SDK1)] | 78 kDa  | 0.0078 | 11 | 7  | 4  | 1  | 1  | 2  | 3 | 0  | 4 | 0  | 0 | - | 1.403598996 | 0% (0.34)  |
| COIA1_HUMAN (+2)     | ERD22_HUMAN     | KDEL2     | P53947 | ER lumen protein retaining receptor 2 (ERD2-like protein 1) (ELP-1) (KDEL endoplasmic reticulum protein retention receptor 2) (KDEL receptor 2)                                                                                                                     | 24 kDa  | 0.025  | 10 | 7  | 4  | 2  | 1  | 1  | 3 | 0  | 2 | 0  | 1 | - | 1.403598996 | 0% (0.34)  |
| ALDR_HUMAN           | NTSD3_HUMAN N   | NTSDC3    | Q86UY8 | 5'-nucleotidase domain-containing protein 3 (EC 3.1.3.-) (GRP94-neighbor nucleotidase)                                                                                                                                                                              | 63 kDa  | 0.16   | 11 | 7  | 4  | 5  | 1  | 1  | 0 | 0  | 0 | 2  | 2 | - | 1.403598996 | 0% (0.34)  |



|                   |              |               |        |                                                                                                                                                                                                                                   |         |       |     |     |    |    |    |    |    |    |    |    |    |                      |                |
|-------------------|--------------|---------------|--------|-----------------------------------------------------------------------------------------------------------------------------------------------------------------------------------------------------------------------------------|---------|-------|-----|-----|----|----|----|----|----|----|----|----|----|----------------------|----------------|
| HMGB2_HUMAN (+1)  | B4DNZ1_HUMAN |               | B4DNZ1 | cDNA FLJ53633, highly similar to Transmembrane BAX inhibitor motif-containing protein 1                                                                                                                                           | 28 kDa  | 0.33  | 11  | 7   | 4  | 4  | 1  | 2  | 0  | 0  | 0  | 1  | 3  | -<br>1.4035989<br>96 | 0%<br>(0.34)   |
| PB1_HUMAN         | ARPC3_HUMAN  | ARPC3         | O15145 | Actin-related protein 2/3 complex subunit 3 (Arp2/3 complex 21 kDa subunit) (p21-ARC)                                                                                                                                             | 21 kDa  | 0.014 | 47  | 29  | 18 | 5  | 6  | 9  | 9  | 7  | 4  | 4  | 3  | -<br>1.4037131<br>17 | 0%<br>(0.14)   |
| B4DE65_HUMAN      | Q6LEU0_HUMAN | STX12         | Q6LEU0 | STX12 protein (Fragment)                                                                                                                                                                                                          | 31 kDa  | 0.12  | 47  | 29  | 18 | 11 | 6  | 5  | 7  | 2  | 2  | 3  | 11 | -<br>1.4037131<br>17 | 0%<br>(0.14)   |
| TMM70_HUMAN       | E7ES33_HUMAN | 39326         | E7ES33 | Septin-7                                                                                                                                                                                                                          | 51 kDa  | 0.081 | 47  | 29  | 18 | 5  | 7  | 10 | 6  | 3  | 5  | 0  | 6  | -<br>1.4037131<br>17 | 0%<br>(0.14)   |
| GNA11_HUMAN (+1)  | GBB2_HUMAN   | GNB2          | P62879 | Guanine nucleotide-binding protein G(I)/G(S)/G(T) subunit beta-2 (G protein subunit beta-2) (Transducin beta chain 2)                                                                                                             | 37 kDa  | 0.16  | 86  | 51  | 32 | 17 | 13 | 12 | 9  | 12 | 4  | 7  | 9  | -<br>1.4038273<br>02 | 0%<br>(0.074)  |
| E9PKU7_HUMAN      | TM9S2_HUMAN  | TM9SF2        | Q99805 | Transmembrane 9 superfamily member 2 (p76)                                                                                                                                                                                        | 76 kDa  | 0.34  | 60  | 37  | 23 | 12 | 9  | 7  | 9  | 6  | 6  | 8  | 3  | -<br>1.4090189<br>1  | 0%<br>(0.11)   |
| B4DKR0_HUMAN (+3) | I7GSS2_HUMAN | HLA-C         | I7GSS2 | MHC class I antigen (Fragment)                                                                                                                                                                                                    | 32 kDa  | 0.085 | 117 | 72  | 45 | 13 | 19 | 14 | 25 | 5  | 8  | 14 | 17 | -<br>1.4149820<br>84 | 95%<br>(0.037) |
| B3KNQ2_HUMAN (+2) | A8K6V6_HUMAN |               | A8K6V6 | cDNA FLJ75883, highly similar to Homo sapiens glucosamine (N-acetyl)-6-sulfatase (Sanfilippo disease III) (GNS), mRNA                                                                                                             | 62 kDa  | 0.2   | 22  | 15  | 9  | 4  | 6  | 3  | 1  | 2  | 1  | 4  | 2  | -<br>1.4160914<br>79 | 0%<br>(0.23)   |
| ERD22_HUMAN       | LTOR1_HUMAN  | LAMTOR1       | Q6IAA8 | Regulator complex protein LAMTOR1 (Late endosomal/lysosomal adaptor and MAPK and MTOR activator 1) (Lipid raft adaptor protein p18) (Protein associated with DRMs and endosomes) (p27Kip1-releasing factor from RhoA) (p27RF-Rho) | 18 kDa  | 0.13  | 24  | 15  | 9  | 7  | 2  | 3  | 4  | 0  | 2  | 2  | 5  | -<br>1.4160914<br>79 | 0%<br>(0.23)   |
| PIGO_HUMAN        | TMED4_HUMAN  | TMED4         | Q7Z7H5 | Transmembrane emp24 domain-containing protein 4 (Endoplasmic reticulum stress-response protein 25) (ERS25) (GMP25iso) (Putative NF-kappa-B-activating protein 156) (p24 family protein alpha-3) (p24alpha3)                       | 26 kDa  | 0.026 | 24  | 15  | 9  | 4  | 4  | 2  | 5  | 2  | 3  | 2  | 2  | -<br>1.4160914<br>79 | 0%<br>(0.23)   |
| EMC8_HUMAN (+1)   | B4E3I3_HUMAN |               | B4E3I3 | cDNA FLJ59614, highly similar to Ubiquitin fusion degradation protein 1 homolog                                                                                                                                                   | 35 kDa  | 0.2   | 23  | 15  | 9  | 0  | 4  | 4  | 5  | 2  | 3  | 2  | 2  | -<br>1.4160914<br>79 | 0%<br>(0.23)   |
| B5MDE0_HUMAN (+1) | MVP_HUMAN    | MVP           | Q14764 | Major vault protein (MVP) (Lung resistance-related protein)                                                                                                                                                                       | 99 kDa  | 0.098 | 189 | 115 | 72 | 35 | 31 | 35 | 17 | 11 | 22 | 18 | 21 | -<br>1.4181160<br>9  | 95%<br>(0.011) |
| A8K6Q8_HUMAN      | Q5HYI5_HUMAN | DKFZp313C1541 | Q5HYI5 | Putative uncharacterized protein DKFZp313C1541                                                                                                                                                                                    | 23 kDa  | 0.41  | 113 | 69  | 43 | 18 | 14 | 0  | 21 | 0  | 11 | 0  | 0  | -<br>1.4183514<br>28 | 95%<br>(0.040) |
| NT5D3_HUMAN       | SPTN2_HUMAN  | SPTBN2        | O15020 | Spectrin beta chain, non-erythrocytic 2 (Beta-III spectrin) (Spinocerebellar ataxia 5 protein)                                                                                                                                    | 271 kDa | 0.11  | 37  | 23  | 14 | 10 | 3  | 4  | 6  | 7  | 2  | 5  | 0  | -<br>1.4204211<br>06 | 0%<br>(0.17)   |
| D3DNA1_HUMAN (+1) | SPB6_HUMAN   | SERPIN6       | P35237 | Serpin B6 (Cytoplasmic antipeptidase) (CAP) (Peptidase inhibitor 6) (PI-6) (Placental thrombin inhibitor)                                                                                                                         | 43 kDa  | 0.075 | 36  | 23  | 14 | 10 | 8  | 5  | 0  | 2  | 4  | 3  | 5  | -<br>1.4204211<br>06 | 0%<br>(0.17)   |
| B2R4V4_HUMAN (+1) | F6IQP1_HUMAN | HLA-C         | F6IQP1 | MHC class I antigen (Fragment)                                                                                                                                                                                                    | 39 kDa  | 0.19  | 107 | 66  | 41 | 0  | 19 | 12 | 22 | 0  | 7  | 0  | 0  | -<br>1.4220410<br>07 | 95%<br>(0.042) |
| B7Z2D6_HUMAN (+1) | B0UXB6_HUMAN | ABHD16A       | B0UXB6 | Abhydrolase domain-containing protein 16A (HLA-B associated transcript 5, isoform CRA_b)                                                                                                                                          | 68 kDa  | 0.014 | 63  | 39  | 24 | 12 | 5  | 5  | 18 | 1  | 3  | 10 | 10 | -<br>1.4239887       | 0%<br>(0.096)  |
| SNF5_HUMAN        | B7Z3E5_HUMAN |               | B7Z3E5 | cDNA FLJ53573, highly similar to Myosin Ic                                                                                                                                                                                        | 119 kDa | 0.15  | 127 | 79  | 49 | 27 | 17 | 16 | 19 | 8  | 6  | 16 | 19 | -<br>1.4268493<br>27 | 95%<br>(0.028) |
| NTF2_HUMAN        | TACD2_HUMAN  | TACSTD2       | P09758 | Tumor-associated calcium signal transducer 2 (Cell surface glycoprotein Trop-2) (Membrane component chromosome 1 surface marker)                                                                                                  | 36 kDa  | 0.24  | 97  | 60  | 37 | 21 | 12 | 14 | 13 | 17 | 3  | 4  | 13 | -<br>1.4305817<br>99 | 95%<br>(0.048) |

|                   |              |         |        |                                                                                                                                                                                                                          |         |       |     |     |    |    |    |    |    |   |    |    |    |   |             |     |         |
|-------------------|--------------|---------|--------|--------------------------------------------------------------------------------------------------------------------------------------------------------------------------------------------------------------------------|---------|-------|-----|-----|----|----|----|----|----|---|----|----|----|---|-------------|-----|---------|
|                   |              |         |        | 1) (Pancreatic carcinoma marker protein GA733-1)                                                                                                                                                                         |         |       |     |     |    |    |    |    |    |   |    |    |    |   |             |     |         |
| SAFB2_HUMAN       | RRP5_HUMAN   | PDCD11  | Q14690 | Protein RRP5 homolog (NF-kappa-B-binding protein) (NFBP) (Programmed cell death protein 11)                                                                                                                              | 209 kDa | 0.065 | 32  | 20  | 12 | 1  | 5  | 7  | 7  | 6 | 2  | 3  | 1  | - | 1.432563978 | 0%  | (0.18)  |
| I7B0X5_HUMAN      | B4DVA7_HUMAN |         | B4DVA7 | Beta-hexosaminidase (EC 3.2.1.52)                                                                                                                                                                                        | 62 kDa  | 0.41  | 32  | 20  | 12 | 2  | 5  | 9  | 5  | 1 | 1  | 7  | 3  | - | 1.432563978 | 0%  | (0.18)  |
| E41L5_HUMAN       | J3QRS3_HUMAN | MYL12A  | J3QRS3 | Myosin regulatory light chain 12A (Myosin regulatory light chain MRCL3, isoform CRA_b)                                                                                                                                   | 20 kDa  | 0.064 | 32  | 20  | 12 | 4  | 7  | 4  | 5  | 2 | 4  | 3  | 3  | - | 1.432563978 | 0%  | (0.18)  |
| E5KNQ5_HUMAN      | B2ZDQ1_HUMAN | NGAL    | B2ZDQ1 | Neutrophil gelatinase-associated lipocalin                                                                                                                                                                               | 23 kDa  | 0.059 | 168 | 105 | 65 | 25 | 24 | 30 | 28 | 6 | 22 | 13 | 24 | - | 1.433037004 | 95% | (0.012) |
| B4E1G6_HUMAN (+1) | Q53HG7_HUMAN |         | Q53HG7 | Cortactin isoform a variant (Fragment)                                                                                                                                                                                   | 62 kDa  | 0.13  | 19  | 12  | 7  | 4  | 1  | 4  | 3  | 1 | 4  | 0  | 2  | - | 1.434562562 | 0%  | (0.25)  |
| A8K644_HUMAN (+1) | B7Z7N1_HUMAN |         | B7Z7N1 | cDNA FLJ50915, highly similar to NADH dehydrogenase (ubiquinone) 1 beta subcomplex subunit 9 (EC 1.6.5.3)                                                                                                                | 21 kDa  | 0.071 | 21  | 12  | 7  | 3  | 1  | 1  | 7  | 3 | 1  | 1  | 1  | - | 1.434562562 | 0%  | (0.25)  |
| SYAM_HUMAN        | D7RF68_HUMAN |         | D7RF68 | AGTRAP-BRAF fusion protein                                                                                                                                                                                               | 66 kDa  | 0.049 | 18  | 12  | 7  | 5  | 4  | 3  | 0  | 0 | 2  | 0  | 4  | - | 1.434562562 | 0%  | (0.25)  |
| FPPS_HUMAN        | A8K935_HUMAN |         | A8K935 | cDNA FLJ75184, highly similar to Homo sapiens K-Cl cotransporter KCC3 mRNA                                                                                                                                               | 128 kDa | 0.13  | 5   | 4   | 2  | 2  | 1  | 1  | 0  | 0 | 0  | 0  | 2  | - | 1.442846402 | 0%  | (0.40)  |
| Q29849_HUMAN      | F8VSD4_HUMAN | UBE2N   | F8VSD4 | Ubiquitin-conjugating enzyme E2 N                                                                                                                                                                                        | 12 kDa  | 0.25  | 6   | 4   | 2  | 0  | 0  | 3  | 1  | 0 | 0  | 1  | 0  | - | 1.442846402 | 0%  | (0.40)  |
| POF1B_HUMAN       | A8K5K5_HUMAN | EIF3G   | A8K5K5 | Eukaryotic translation initiation factor 3 subunit G (eIF3g) (Eukaryotic translation initiation factor 3 RNA-binding subunit) (Eukaryotic translation initiation factor 3 subunit 4) (eIF-3-delta) (eIF3 p42) (eIF3 p44) | 36 kDa  | 0.065 | 6   | 4   | 2  | 1  | 1  | 2  | 1  | 1 | 0  | 1  | 0  | - | 1.442846402 | 0%  | (0.40)  |
| CBP_HUMAN         | PNKD_HUMAN   | PNKD    | Q8N490 | Probable hydrolase PNKD (EC 3.-.-.) (Myofibrillogenesis regulator 1) (MR-1) (Paroxysmal nonkinesio-genic dyskinesia protein) (Trans-activated by hepatitis C virus core protein 2)                                       | 43 kDa  | 0.014 | 6   | 4   | 2  | 2  | 0  | 0  | 2  | 0 | 2  | 0  | 0  | - | 1.442846402 | 0%  | (0.40)  |
| CO9_HUMAN         | A8K8J9_HUMAN | DCTN2   | A8K8J9 | Dynactin 2 (P50), isoform CRA_b (cDNA FLJ31120 fis, clone IMR322000730, highly similar to Dynactin subunit 2) (cDNA FLJ77785)                                                                                            | 34 kDa  | 0.084 | 6   | 4   | 2  | 0  | 2  | 2  | 0  | 0 | 1  | 0  | 1  | - | 1.442846402 | 0%  | (0.40)  |
| B7ZB83_HUMAN      | SNF5_HUMAN   | SMARCB1 | Q12824 | SWI/SNF-related matrix-associated actin-dependent regulator of chromatin subfamily B member 1 (BRG1-associated factor 47) (BAF47) (Integrase interactor 1 protein) (SNF5 homolog) (hSNF5)                                | 44 kDa  | 0.098 | 5   | 4   | 2  | 2  | 0  | 0  | 2  | 0 | 0  | 1  | 1  | - | 1.442846402 | 0%  | (0.40)  |
| CO6A3_HUMAN       | B7Z410_HUMAN |         | B7Z410 | cDNA FLJ50791, highly similar to Nitrilase homolog 1 (EC 3.5.-.-)                                                                                                                                                        | 34 kDa  | 0.01  | 6   | 4   | 2  | 0  | 1  | 0  | 3  | 2 | 0  | 0  | 0  | - | 1.442846402 | 0%  | (0.40)  |
| B4DHE8_HUMAN (+1) | J3KPT4_HUMAN | TRABD   | J3KPT4 | TraB domain-containing protein                                                                                                                                                                                           | 43 kDa  | 0.15  | 6   | 4   | 2  | 3  | 0  | 1  | 0  | 0 | 0  | 0  | 2  | - | 1.442846402 | 0%  | (0.40)  |
| ODBB_HUMAN        | STX6_HUMAN   | STX6    | O43752 | Syntaxin-6                                                                                                                                                                                                               | 29 kDa  | 0.1   | 6   | 4   | 2  | 2  | 1  | 1  | 0  | 0 | 0  | 2  | 0  | - | 1.442846402 | 0%  | (0.40)  |
| ACPH_HUMAN (+1)   | ODR4_HUMAN   | ODR4    | Q5SWX8 | Protein odr-4 homolog (hODR-4) (LAG1-interacting protein) (Transactivated by transforming growth factor beta protein 1)                                                                                                  | 51 kDa  | 0.057 | 6   | 4   | 2  | 4  | 0  | 0  | 0  | 0 | 0  | 0  | 2  | - | 1.442846402 | 0%  | (0.40)  |
| B4DNZ1_HUMAN (+9) | Q53HE3_HUMAN |         | Q53HE3 | Breast carcinoma amplified sequence 2 variant (Fragment)                                                                                                                                                                 | 26 kDa  | 0.06  | 6   | 4   | 2  | 0  | 0  | 0  | 4  | 0 | 0  | 2  | 0  | - | 1.442846402 | 0%  | (0.40)  |

|                   |              |               |        |                                                                                                                                                                                                                  |         |       |     |    |    |    |    |    |    |    |    |    |    |   |             |             |
|-------------------|--------------|---------------|--------|------------------------------------------------------------------------------------------------------------------------------------------------------------------------------------------------------------------|---------|-------|-----|----|----|----|----|----|----|----|----|----|----|---|-------------|-------------|
| RT31_HUMAN        | ERD21_HUMAN  | KDELRL1       | P24390 | ER lumen protein retaining receptor 1 (KDEL endoplasmic reticulum protein retention receptor 1) (KDEL receptor 1) (Putative MAPK-activating protein PM23)                                                        | 25 kDa  | 0.13  | 6   | 4  | 2  | 1  | 1  | 0  | 2  | 0  | 2  | 0  | 0  | - | 1.442846402 | 0% (0.40)   |
| A8K5L5_HUMAN (+3) | VPS29_HUMAN  | VPS29         | Q9UBQ0 | Vacuolar protein sorting-associated protein 29 (hVPS29) (EC 3.1.3.3) (PEP11 homolog) (Vesicle protein sorting 29)                                                                                                | 21 kDa  | 0.075 | 6   | 4  | 2  | 0  | 2  | 1  | 1  | 0  | 2  | 0  | 0  | - | 1.442846402 | 0% (0.40)   |
| G3XAI2_HUMAN (+1) | DERL1_HUMAN  | DERL1         | Q9BUN8 | Derlin-1 (Degradation in endoplasmic reticulum protein 1) (DERtrin-1) (Der1-like protein 1)                                                                                                                      | 29 kDa  | 0.018 | 43  | 25 | 15 | 6  | 9  | 4  | 6  | 4  | 4  | 3  | 4  | - | 1.442965922 | 0% (0.15)   |
| B4DWG1_HUMAN (+2) | B5BU25_HUMAN | U2AF2         | B5BU25 | U2 small nuclear RNA auxiliary factor 2 isoform b                                                                                                                                                                | 53 kDa  | 0.062 | 40  | 25 | 15 | 4  | 7  | 7  | 7  | 5  | 4  | 6  | 1  | - | 1.442965922 | 0% (0.15)   |
| GTPBA_HUMAN       | L7QJN0_HUMAN | HLA-B         | L7QJN0 | MHC class I antigen (Fragment)                                                                                                                                                                                   | 32 kDa  | 0.12  | 74  | 46 | 28 | 0  | 15 | 0  | 11 | 0  | 0  | 0  | 12 | - | 1.443085507 | 0% (0.069)  |
| NCF1B_HUMAN (+2)  | E9PC28_HUMAN | PTPRC         | E9PC28 | Receptor-type tyrosine-protein phosphatase C                                                                                                                                                                     | 142 kDa | 0.087 | 61  | 38 | 23 | 3  | 11 | 19 | 5  | 0  | 2  | 15 | 6  | - | 1.445874591 | 0% (0.090)  |
| B4DUC8_HUMAN (+3) | RAB43_HUMAN  | RAB43         | Q86YS6 | Ras-related protein Rab-43 (Ras-related protein Rab-41)                                                                                                                                                          | 23 kDa  | 0.12  | 61  | 38 | 23 | 9  | 9  | 10 | 10 | 5  | 7  | 5  | 6  | - | 1.445874591 | 0% (0.090)  |
| LTOR4_HUMAN       | RL10A_HUMAN  | RPL10A        | P62906 | 60S ribosomal protein L10a (CSA-19) (Neural precursor cell expressed developmentally down-regulated protein 6) (NEDD-6)                                                                                          | 25 kDa  | 0.28  | 103 | 64 | 39 | 17 | 13 | 16 | 19 | 14 | 10 | 7  | 8  | - | 1.448313266 | 95% (0.037) |
| B3KSR7_HUMAN (+1) | MARH5_HUMAN  | 38412         | Q9NX47 | E3 ubiquitin-protein ligase MARCH5 (EC 6.3.2.-) (Membrane-associated RING finger protein 5) (Membrane-associated RING-CH protein V) (MARCH-V) (Mitochondrial ubiquitin ligase) (MITOL) (RING finger protein 153) | 31 kDa  | 0.07  | 27  | 17 | 10 | 8  | 3  | 1  | 5  | 5  | 2  | 0  | 3  | - | 1.449028975 | 0% (0.20)   |
| B4DGX2_HUMAN (+1) | GNAQ_HUMAN   | GNAQ          | P50148 | Guanine nucleotide-binding protein G(q) subunit alpha (Guanine nucleotide-binding protein alpha-q)                                                                                                               | 42 kDa  | 0.11  | 27  | 17 | 10 | 9  | 3  | 3  | 2  | 3  | 0  | 4  | 3  | - | 1.449028975 | 0% (0.20)   |
| NUCG_HUMAN        | DCMC_HUMAN   | MLYCD         | O95822 | Malonyl-CoA decarboxylase, mitochondrial (MCD) (EC 4.1.1.9)                                                                                                                                                      | 55 kDa  | 0.18  | 27  | 17 | 10 | 7  | 7  | 3  | 0  | 5  | 0  | 2  | 3  | - | 1.449028975 | 0% (0.20)   |
| A8K693_HUMAN      | PDIP2_HUMAN  | POLDIP2       | Q9Y2S7 | Polymerase delta-interacting protein 2 (38 kDa DNA polymerase delta interaction protein) (p38)                                                                                                                   | 42 kDa  | 0.13  | 27  | 17 | 10 | 4  | 3  | 4  | 6  | 4  | 0  | 3  | 3  | - | 1.449028975 | 0% (0.20)   |
| LARP1_HUMAN       | H0Y9V9_HUMAN | RPL9          | H0Y9V9 | 60S ribosomal protein L9 (Fragment)                                                                                                                                                                              | 22 kDa  | 0.026 | 48  | 30 | 18 | 7  | 8  | 6  | 9  | 4  | 7  | 2  | 5  | - | 1.450135494 | 0% (0.12)   |
| B4DG11_HUMAN (+1) | Q5JQ44_HUMAN | DKFZp547A0616 | Q5JQ44 | Putative uncharacterized protein DKFZp547A0616 (Fragment)                                                                                                                                                        | 20 kDa  | 0.064 | 56  | 35 | 21 | 10 | 9  | 7  | 8  | 4  | 9  | 5  | 3  | - | 1.455380173 | 0% (0.096)  |
| E7ET76_HUMAN      | GSLG1_HUMAN  | GLG1          | Q92896 | Golgi apparatus protein 1 (CFR-1) (Cysteine-rich fibroblast growth factor receptor) (E-selectin ligand 1) (ESL-1) (Golgi sialoglycoprotein MG-160)                                                               | 135 kDa | 0.086 | 35  | 22 | 13 | 7  | 9  | 4  | 3  | 3  | 2  | 5  | 3  | - | 1.457417492 | 0% (0.16)   |
| PERE_HUMAN        | B4DG42_HUMAN |               | B4DG42 | cDNA FLJ53753, highly similar to Myeloid-associated differentiation marker                                                                                                                                       | 31 kDa  | 0.05  | 34  | 22 | 13 | 9  | 4  | 4  | 5  | 2  | 4  | 4  | 3  | - | 1.457417492 | 0% (0.16)   |
| G1MA1_HUMAN       | DDX1_HUMAN   | DDX1          | Q92499 | ATP-dependent RNA helicase DDX1 (EC 3.6.4.13) (DEAD box protein 1) (DEAD box protein retinoblastoma) (DBP-RB)                                                                                                    | 82 kDa  | 0.082 | 35  | 22 | 13 | 4  | 4  | 4  | 10 | 2  | 6  | 5  | 0  | - | 1.457417492 | 0% (0.16)   |
| B2R4F3_HUMAN (+3) | F5GYR8_HUMAN | USO1          | F5GYR8 | General vesicular transport factor p115                                                                                                                                                                          | 109 kDa | 0.13  | 35  | 22 | 13 | 2  | 8  | 6  | 6  | 4  | 6  | 3  | 0  | - | 1.457417492 | 0% (0.16)   |
| QCR9_HUMAN        | B4DT31_HUMAN | FUBP1         | B4DT31 | Far upstream element-binding protein 1 (cDNA FLJ53425, highly similar to Far upstream element-binding protein 1)                                                                                                 | 70 kDa  | 0.38  | 35  | 22 | 13 | 2  | 7  | 7  | 6  | 1  | 1  | 9  | 2  | - | 1.457417492 | 0% (0.16)   |

|                   |              |         |        |                                                                                                                                                                                                                                                                                                                        |         |       |    |    |    |    |   |   |    |   |   |   |   |                      |              |
|-------------------|--------------|---------|--------|------------------------------------------------------------------------------------------------------------------------------------------------------------------------------------------------------------------------------------------------------------------------------------------------------------------------|---------|-------|----|----|----|----|---|---|----|---|---|---|---|----------------------|--------------|
| EHD1_HUMAN        | B4DT35_HUMAN | NUP54   | B4DT35 | Nucleoporin p54 (cDNA FLJ52746, highly similar to Nucleoporin p54)                                                                                                                                                                                                                                                     | 51 kDa  | 0.18  | 35 | 22 | 13 | 4  | 5 | 7 | 6  | 2 | 5 | 3 | 3 | -<br>1.4574174<br>92 | 0%<br>(0.16) |
| NCF2_HUMAN        | TIDC1_HUMAN  | TIMMDC1 | Q9NPL8 | Translocase of inner mitochondrial membrane domain-containing protein 1 (Protein M5-14)                                                                                                                                                                                                                                | 32 kDa  | 0.074 | 35 | 22 | 13 | 6  | 7 | 5 | 4  | 6 | 2 | 1 | 4 | -<br>1.4574174<br>92 | 0%<br>(0.16) |
| GAR1_HUMAN        | Q6PK82_HUMAN | AP3D1   | Q6PK82 | AP3D1 protein (Fragment)                                                                                                                                                                                                                                                                                               | 99 kDa  | 0.074 | 14 | 9  | 5  | 4  | 1 | 3 | 2  | 1 | 1 | 2 | 1 | -<br>1.4648635<br>24 | 0%<br>(0.28) |
| A8K8E1_HUMAN (+1) | B4DGM3_HUMAN | SMARCE1 | B4DGM3 | SWI/SNF-related matrix-associated actin-dependent regulator of chromatin subfamily E member 1 (cDNA FLJ55202, highly similar to SWI/SNF-related matrix-associated actin-dependent regulator of chromatin subfamily E member 1)                                                                                         | 45 kDa  | 0.072 | 14 | 9  | 5  | 6  | 1 | 2 | 0  | 0 | 0 | 2 | 3 | -<br>1.4648635<br>24 | 0%<br>(0.28) |
| PHF2_HUMAN        | B7Z954_HUMAN |         | B7Z954 | cDNA FLJ61560, highly similar to Tight junction protein ZO-2                                                                                                                                                                                                                                                           | 125 kDa | 0.02  | 14 | 9  | 5  | 2  | 1 | 2 | 4  | 3 | 1 | 1 | 0 | -<br>1.4648635<br>24 | 0%<br>(0.28) |
| B1AUU8_HUMAN (+2) | B7Z587_HUMAN |         | B7Z587 | cDNA FLJ51273, highly similar to Transmembrane protein 11                                                                                                                                                                                                                                                              | 19 kDa  | 0.062 | 13 | 9  | 5  | 3  | 0 | 2 | 3  | 1 | 2 | 0 | 2 | -<br>1.4648635<br>24 | 0%<br>(0.28) |
| B2R7V4_HUMAN (+1) | MA1B1_HUMAN  | MAN1B1  | Q9UKM7 | Endoplasmic reticulum mannosyl-oligosaccharide 1,2-alpha-mannosidase (EC 3.2.1.113) (ER alpha-1,2-mannosidase) (ER mannosidase 1) (ERMan1) (Man9GlcNAc2-specific-processing alpha-mannosidase) (Mannosidase alpha class 1B member 1)                                                                                   | 80 kDa  | 0.075 | 14 | 9  | 5  | 0  | 2 | 3 | 4  | 2 | 0 | 3 | 0 | -<br>1.4648635<br>24 | 0%<br>(0.28) |
| COX15_HUMAN       | Q3B7X1_HUMAN | TMX3    | Q3B7X1 | TMX3 protein (Fragment)                                                                                                                                                                                                                                                                                                | 49 kDa  | 0.098 | 14 | 9  | 5  | 6  | 3 | 0 | 0  | 0 | 1 | 1 | 4 | -<br>1.4648635<br>24 | 0%<br>(0.28) |
| RRF2M_HUMAN       | LGAT1_HUMAN  | LPGAT1  | Q92604 | Acyl-CoA:lysophosphatidylglycerol acyltransferase 1 (EC 2.3.1.-)                                                                                                                                                                                                                                                       | 43 kDa  | 0.06  | 14 | 9  | 5  | 7  | 1 | 1 | 0  | 0 | 1 | 1 | 3 | -<br>1.4648635<br>24 | 0%<br>(0.28) |
| TMM68_HUMAN       | SNP23_HUMAN  | SNAP23  | O00161 | Synaptosomal-associated protein 23 (SNAP-23) (Vesicle-membrane fusion protein SNAP-23)                                                                                                                                                                                                                                 | 23 kDa  | 0.13  | 14 | 9  | 5  | 3  | 1 | 2 | 3  | 1 | 0 | 2 | 2 | -<br>1.4648635<br>24 | 0%<br>(0.28) |
| B4DMS5_HUMAN (+1) | DHB7_HUMAN   | HSD17B7 | P56937 | 3-keto-steroid reductase (EC 1.1.1.270) (17-beta-hydroxysteroid dehydrogenase 7) (17-beta-HSD 7) (Estradiol 17-beta-dehydrogenase 7) (EC 1.1.1.62)                                                                                                                                                                     | 38 kDa  | 0.11  | 14 | 9  | 5  | 2  | 2 | 2 | 3  | 3 | 0 | 1 | 1 | -<br>1.4648635<br>24 | 0%<br>(0.28) |
| ACPM_HUMAN        | B2RBG3_HUMAN |         | B2RBG3 | cDNA, FLJ95493, highly similar to Homo sapiens fucosidase, alpha-L-1, tissue (FUCA1), mRNA                                                                                                                                                                                                                             | 53 kDa  | 0.15  | 51 | 32 | 19 | 9  | 6 | 7 | 10 | 3 | 3 | 6 | 8 | -<br>1.4667659<br>93 | 0%<br>(0.10) |
| TRPM4_HUMAN       | D0UU70_HUMAN | MECP2   | D0UU70 | Methyl CpG binding protein 2 isoform 1                                                                                                                                                                                                                                                                                 | 52 kDa  | 0.068 | 22 | 14 | 8  | 5  | 3 | 3 | 3  | 1 | 2 | 1 | 4 | -<br>1.4726196<br>38 | 0%<br>(0.21) |
| HTRA2_HUMAN       | PAFA2_HUMAN  | PAFAH2  | Q99487 | Platelet-activating factor acetylhydrolase 2, cytoplasmic (EC 3.1.1.47) (Serine-dependent phospholipase A2) (SD-PLA2) (hSD-PLA2)                                                                                                                                                                                       | 44 kDa  | 0.059 | 22 | 14 | 8  | 11 | 0 | 1 | 2  | 1 | 0 | 1 | 6 | -<br>1.4726196<br>38 | 0%<br>(0.21) |
| B7Z5W1_HUMAN (+3) | IMPA3_HUMAN  | IMPAD1  | Q9NX62 | Inositol monophosphatase 3 (IMP 3) (IMPase 3) (EC 3.1.3.25) (EC 3.1.3.7) (Golgi 3-prime phosphoadenosine 5-prime phosphate 3-prime phosphatase) (Golgi-resident PAP phosphatase) (gPAPP) (Inositol monophosphatase domain-containing protein 1) (Inositol-1(or 4)-monophosphatase 3) (Myo-inositol monophosphatase A3) | 39 kDa  | 0.076 | 22 | 14 | 8  | 5  | 5 | 3 | 1  | 3 | 3 | 1 | 1 | -<br>1.4726196<br>38 | 0%<br>(0.21) |
| SELT_HUMAN        | SAP18_HUMAN  | SAP18   | O00422 | Histone deacetylase complex subunit SAP18 (18 kDa Sin3-associated polypeptide) (2HOR0202) (Cell growth-                                                                                                                                                                                                                | 18 kDa  | 0.15  | 22 | 14 | 8  | 4  | 2 | 1 | 7  | 3 | 3 | 1 | 1 | -<br>1.4726196<br>38 | 0%<br>(0.21) |

|                   |              |          |        |                                                                                                                                                                                                                                                                                                                                                                                 |         |       |     |     |     |     |    |    |    |    |    |    |    |   |                 |                |           |
|-------------------|--------------|----------|--------|---------------------------------------------------------------------------------------------------------------------------------------------------------------------------------------------------------------------------------------------------------------------------------------------------------------------------------------------------------------------------------|---------|-------|-----|-----|-----|-----|----|----|----|----|----|----|----|---|-----------------|----------------|-----------|
|                   |              |          |        | inhibiting gene 38 protein)<br>(Sin3-associated polypeptide<br>p18)                                                                                                                                                                                                                                                                                                             |         |       |     |     |     |     |    |    |    |    |    |    |    |   |                 |                |           |
| B4DR61_HUMAN (+1) | J3KRX2_HUMAN | SLC39A11 | J3KRX2 | Zinc transporter ZIP11 (Fragment)                                                                                                                                                                                                                                                                                                                                               | 21 kDa  | 0.081 | 22  | 14  | 8   | 5   | 4  | 2  | 3  | 0  | 1  | 3  | 4  | - | 1.4726196<br>38 | 0%             | (0.21)    |
| AG10A_HUMAN (+1)  | J9JID7_HUMAN | LMNB2    | J9JID7 | Lamin B2, isoform CRA_a (Lamin-B2)                                                                                                                                                                                                                                                                                                                                              | 70 kDa  | 0.038 | 90  | 57  | 34  | 30  | 10 | 9  | 8  | 8  | 0  | 11 | 15 | - | 1.4763075<br>79 | 95%            | (0.039)   |
| B7Z6W8_HUMAN (+4) | A4D2P0_HUMAN | RAC1     | A4D2P0 | Ras-related C3 botulinum toxin substrate 1 (Rho family, small GTP binding protein Rac1) (Ras-related C3 botulinum toxin substrate 1 (Rho family, small GTP binding protein Rac1), isoform CRA_e) (cDNA FLJ77333, highly similar to Homo sapiens ras-related C3 botulinum toxin substrate 1 (rho family, small GTP binding protein Rac1) (RAC1), transcript variant Rac1b, mRNA) | 23 kDa  | 0.11  | 30  | 19  | 11  | 6   | 4  | 4  | 6  | 2  | 3  | 3  | 3  | - | 1.4765922<br>21 | 0%             | (0.17)    |
| DJB12_HUMAN (+1)  | B2RCX0_HUMAN |          | B2RCX0 | cDNA FLJ96345, Homo sapiens SET translocation (myeloid leukemia-associated) (SET),mRNA                                                                                                                                                                                                                                                                                          | 32 kDa  | 0.067 | 30  | 19  | 11  | 0   | 6  | 4  | 9  | 2  | 2  | 2  | 5  | - | 1.4765922<br>21 | 0%             | (0.17)    |
| B5MCC7_HUMAN (+3) | B7Z1V4_HUMAN |          | B7Z1V4 | cDNA FLJ56034, highly similar to 4-aminobutyrate aminotransferase, mitochondrial (EC 2.6.1.19)                                                                                                                                                                                                                                                                                  | 58 kDa  | 0.19  | 30  | 19  | 11  | 3   | 7  | 8  | 1  | 1  | 2  | 3  | 5  | - | 1.4765922<br>21 | 0%             | (0.17)    |
| A8K7A4_HUMAN (+1) | B4DJQ8_HUMAN |          | B4DJQ8 | cDNA FLJ5694, highly similar to Dipeptidyl-peptidase 1 (EC 3.4.14.1)                                                                                                                                                                                                                                                                                                            | 50 kDa  | 0.077 | 38  | 24  | 14  | 1   | 7  | 9  | 7  | 1  | 2  | 6  | 5  | - | 1.4790141<br>8  | 0%             | (0.14)    |
| NDUB3_HUMAN       | B4DSN3_HUMAN |          | B4DSN3 | cDNA FLJ60345, highly similar to Protein transport protein Sec24C                                                                                                                                                                                                                                                                                                               | 107 kDa | 0.29  | 38  | 24  | 14  | 3   | 6  | 5  | 11 | 1  | 6  | 7  | 0  | - | 1.4790141<br>8  | 0%             | (0.14)    |
| A6XND5_HUMAN (+3) | B7Z992_HUMAN |          | B7Z992 | cDNA FLJ53698, highly similar to Gelsolin                                                                                                                                                                                                                                                                                                                                       | 79 kDa  | 0.085 | 188 | 119 | 71  | 26  | 36 | 34 | 21 | 11 | 15 | 21 | 23 | - | 1.4873127<br>19 | 95%            | (0.0043)  |
| H0YNA7_HUMAN (+1) | F8W914_HUMAN | RTN4     | F8W914 | Reticulon                                                                                                                                                                                                                                                                                                                                                                       | 37 kDa  | 0.15  | 137 | 86  | 51  | 44  | 16 | 15 | 13 | 7  | 18 | 0  | 19 | - | 1.4920207<br>98 | 95%            | (0.013)   |
| SHLB1_HUMAN       | RN213_HUMAN  | RNF213   | Q63HN8 | E3 ubiquitin-protein ligase RNF213 (EC 6.3.2.-) (ALK lymphoma oligomerization partner on chromosome 17) (Mysterin) (RING finger protein 213)                                                                                                                                                                                                                                    | 591 kDa | 0.074 | 97  | 61  | 36  | 7   | 11 | 10 | 34 | 10 | 21 | 1  | 3  | - | 1.4930108<br>19 | 95%            | (0.031)   |
| B7Z787_HUMAN (+2) | A8K4W0_HUMAN | RPS3A    | A8K4W0 | 40S ribosomal protein S3a                                                                                                                                                                                                                                                                                                                                                       | 30 kDa  | 0.067 | 97  | 61  | 36  | 13  | 13 | 12 | 24 | 11 | 15 | 7  | 4  | - | 1.4930108<br>19 | 95%            | (0.031)   |
| Q6ZQN2_HUMAN      | B4DE59_HUMAN |          | B4DE59 | cDNA FLJ60424, highly similar to Junction plakoglobin                                                                                                                                                                                                                                                                                                                           | 63 kDa  | 0.33  | 525 | 329 | 196 | 141 | 47 | 51 | 91 | 53 | 48 | 40 | 55 | - | 1.4975233<br>68 | 95% (<0.00010) |           |
| DNJC5_HUMAN       | SQRD_HUMAN   | SQRDL    | Q9Y6N5 | Sulfide:quinone oxidoreductase, mitochondrial (EC 1.-.-.-)                                                                                                                                                                                                                                                                                                                      | 50 kDa  | 0.16  | 267 | 169 | 100 | 61  | 33 | 41 | 35 | 7  | 24 | 29 | 39 | - | 1.5029525<br>22 | 95%            | (0.00065) |
| CELF1_HUMAN (+1)  | RS20_HUMAN   | RPS20    | P60866 | 40S ribosomal protein S20                                                                                                                                                                                                                                                                                                                                                       | 13 kDa  | 0.08  | 25  | 16  | 9   | 3   | 4  | 5  | 4  | 3  | 3  | 2  | 1  | - | 1.5032548<br>87 | 0%             | (0.18)    |
| NIBAN_HUMAN       | B2R6X6_HUMAN |          | B2R6X6 | Peptidyl-prolyl cis-trans isomerase (EC 5.2.1.8)                                                                                                                                                                                                                                                                                                                                | 22 kDa  | 0.043 | 17  | 11  | 6   | 2   | 5  | 3  | 1  | 0  | 0  | 4  | 2  | - | 1.5092330<br>69 | 0%             | (0.23)    |
| RM14_HUMAN        | B4DDM6_HUMAN | BUB3     | B4DDM6 | Mitotic checkpoint protein BUB3 (cDNA FLJ57899, highly similar to Mitotic checkpoint protein BUB3)                                                                                                                                                                                                                                                                              | 28 kDa  | 0.13  | 17  | 11  | 6   | 1   | 3  | 3  | 4  | 1  | 2  | 2  | 1  | - | 1.5092330<br>69 | 0%             | (0.23)    |
| B4DS83_HUMAN      | AN32E_HUMAN  | ANP32E   | Q9BTT0 | Acidic leucine-rich nuclear phosphoprotein 32 family member E (LANP-like protein) (LANP-L)                                                                                                                                                                                                                                                                                      | 31 kDa  | 0.049 | 17  | 11  | 6   | 0   | 1  | 2  | 8  | 1  | 4  | 1  | 0  | - | 1.5092330<br>69 | 0%             | (0.23)    |
| B5BU81_HUMAN (+2) | GRPE1_HUMAN  | GRPEL1   | Q9HAV7 | GrpE protein homolog 1, mitochondrial (HMGE) (Mt-GrpE#1)                                                                                                                                                                                                                                                                                                                        | 24 kDa  | 0.15  | 52  | 33  | 19  | 3   | 10 | 14 | 6  | 6  | 4  | 1  | 8  | - | 1.5108986<br>75 | 0%             | (0.083)   |
| AHSA1_HUMAN (+1)  | APMAP_HUMAN  | APMAP    | Q9HDC9 | Adipocyte plasma membrane-associated protein (Protein BSCv)                                                                                                                                                                                                                                                                                                                     | 46 kDa  | 0.12  | 89  | 55  | 32  | 13  | 13 | 15 | 15 | 5  | 6  | 5  | 17 | - | 1.5113750<br>57 | 95%            | (0.034)   |

|                   |              |         |        |                                                                                                                                                                                     |         |       |     |     |    |    |    |    |    |    |    |    |    |   |              |
|-------------------|--------------|---------|--------|-------------------------------------------------------------------------------------------------------------------------------------------------------------------------------------|---------|-------|-----|-----|----|----|----|----|----|----|----|----|----|---|--------------|
| SPS1_HUMAN        | B3KVN0_HUMAN |         | B3KVN0 | cDNA FLJ16785 fis. clone NT2RI2015342, highly similar to Solute carrier family 2, facilitated glucose transporter member 1                                                          | 46 kDa  | 0.14  | 79  | 50  | 29 | 10 | 12 | 17 | 11 | 11 | 8  | 5  | 5  | - | 95% (0.041)  |
| EFHD1_HUMAN       | B3KY04_HUMAN |         | B3KY04 | cDNA FLJ46506 fis. clone THYMU3030752, highly similar to BTB/POZ domain-containing protein KCTD12                                                                                   | 36 kDa  | 0.17  | 36  | 23  | 13 | 1  | 11 | 8  | 3  | 1  | 6  | 3  | 3  | - | 0% (0.12)    |
| B4DFY5_HUMAN (+1) | LYRIC_HUMAN  | MTDH    | Q86UE4 | Protein LYRIC (3D3/LYRIC) (Astrocyte elevated gene-1 protein) (AEG-1) (Lysine-rich CEACAM1 co-isolated protein) (Metadherin) (Metastasis adhesion protein)                          | 64 kDa  | 0.075 | 35  | 23  | 13 | 7  | 7  | 3  | 5  | 2  | 6  | 2  | 3  | - | 0% (0.12)    |
| CAH2_HUMAN        | B4DDB9_HUMAN |         | B4DDB9 | cDNA FLJ56339, highly similar to Signal peptidase complex subunit 2 (EC 3.4.-.-)                                                                                                    | 25 kDa  | 0.19  | 36  | 23  | 13 | 8  | 3  | 3  | 7  | 1  | 3  | 4  | 6  | - | 0% (0.12)    |
| Q5J8M4_HUMAN      | A8K4K9_HUMAN |         | A8K4K9 | cDNA FLJ76169                                                                                                                                                                       | 35 kDa  | 0.12  | 36  | 23  | 13 | 6  | 5  | 3  | 10 | 3  | 6  | 1  | 3  | - | 0% (0.12)    |
| PAXB1_HUMAN       | ACO13_HUMAN  | ACOT13  | Q9NPJ3 | Acyl-coenzyme A thioesterase 13 (Acyl-CoA thioesterase 13) (EC 3.1.2.-) (Thioesterase superfamily member 2) [Cleaved into: Acyl-coenzyme A thioesterase 13, N-terminally processed] | 15 kDa  | 0.031 | 37  | 23  | 13 | 4  | 8  | 7  | 5  | 6  | 3  | 2  | 2  | - | 0% (0.12)    |
| B7Z966_HUMAN (+1) | LDHA_HUMAN   | LDHA    | P00338 | L-lactate dehydrogenase A chain (LDH-A) (EC 1.1.1.27) (Cell proliferation-inducing gene 19 protein) (LDH muscle subunit) (LDH-M) (Renal carcinoma antigen NY-REN-59)                | 37 kDa  | 0.083 | 201 | 127 | 74 | 24 | 34 | 34 | 36 | 22 | 10 | 21 | 21 | - | 95% (0.0021) |
| Q58EY4_HUMAN (+1) | F5GZD0_HUMAN | NPTN    | F5GZD0 | Neuroplastin                                                                                                                                                                        | 44 kDa  | 0.06  | 9   | 6   | 3  | 3  | 1  | 0  | 2  | 1  | 0  | 0  | 2  | - | 0% (0.31)    |
| B7Z410_HUMAN      | B7Z920_HUMAN |         | B7Z920 | cDNA FLJ61714, highly similar to Tripeptidyl-peptidase 2 (EC 3.4.14.10) (Fragment)                                                                                                  | 118 kDa | 0.13  | 10  | 6   | 3  | 0  | 2  | 4  | 0  | 0  | 0  | 3  | 0  | - | 0% (0.31)    |
| A8K321_HUMAN (+2) | B7Z4S4_HUMAN |         | B7Z4S4 | cDNA FLJ52567, highly similar to Renin receptor                                                                                                                                     | 36 kDa  | 0.093 | 9   | 6   | 3  | 1  | 2  | 1  | 2  | 0  | 0  | 0  | 3  | - | 0% (0.31)    |
| FA5_HUMAN         | SRS11_HUMAN  | SRSF11  | Q05519 | Serine/arginine-rich splicing factor 11 (Arginine-rich 54 kDa nuclear protein) (p54) (Splicing factor, arginine/serine-rich 11)                                                     | 54 kDa  | 0.017 | 9   | 6   | 3  | 0  | 3  | 1  | 2  | 1  | 0  | 2  | 0  | - | 0% (0.31)    |
| ATG7_HUMAN (+1)   | NDK3_HUMAN   | NME3    | Q13232 | Nucleoside diphosphate kinase 3 (NDK 3) (NDP kinase 3) (EC 2.7.4.6) (DR-nm23) (Nucleoside diphosphate kinase C) (NDPKC) (nm23-H5)                                                   | 19 kDa  | 0.088 | 9   | 6   | 3  | 3  | 0  | 1  | 2  | 1  | 0  | 2  | 0  | - | 0% (0.31)    |
| P3C2A_HUMAN       | A8K337_HUMAN |         | A8K337 | cDNA FLJ77862, highly similar to Homo sapiens catechol-O-methyltransferase domain containing 1 (COMTD1), mRNA                                                                       | 29 kDa  | 0.018 | 10  | 6   | 3  | 1  | 0  | 0  | 5  | 2  | 0  | 2  | 0  | - | 0% (0.31)    |
| E9PHY5_HUMAN (+1) | KPRA_HUMAN   | PRPSAP1 | Q14558 | Phosphoribosyl pyrophosphate synthase-associated protein 1 (PRPP synthase-associated protein 1) (39 kDa phosphoribosylpyrophosphate synthase-associated protein) (PAP39)            | 39 kDa  | 0.045 | 9   | 6   | 3  | 0  | 4  | 2  | 0  | 1  | 0  | 2  | 0  | - | 0% (0.31)    |
| NFKB2_HUMAN       | EMC8_HUMAN   | EMC8    | O43402 | ER membrane protein complex subunit 8 (Neighbor of COX4) (Protein FAMI58B)                                                                                                          | 24 kDa  | 0.054 | 9   | 6   | 3  | 1  | 4  | 1  | 0  | 0  | 1  | 0  | 2  | - | 0% (0.31)    |
| CP4FB_HUMAN       | NCF1B_HUMAN  | NCF1B   | A6NI72 | Putative neutrophil cytosol factor 1B (NCF-1B) (Putative SH3 and PX domain-containing protein 1B)                                                                                   | 45 kDa  | 0.09  | 9   | 6   | 3  | 0  | 3  | 3  | 0  | 0  | 1  | 0  | 2  | - | 0% (0.31)    |
| PGH2_HUMAN        | NUCG_HUMAN   | ENDOG   | Q14249 | Endonuclease G, mitochondrial (Endo G) (EC 3.1.30.-)                                                                                                                                | 33 kDa  | 0.12  | 9   | 6   | 3  | 6  | 0  | 0  | 0  | 1  | 0  | 2  | 0  | - | 0% (0.31)    |

|                   |              |         |        |                                                                                                                                                                                                                                                                                              |        |       |     |     |     |    |    |    |    |    |    |    |    |   |             |                 |
|-------------------|--------------|---------|--------|----------------------------------------------------------------------------------------------------------------------------------------------------------------------------------------------------------------------------------------------------------------------------------------------|--------|-------|-----|-----|-----|----|----|----|----|----|----|----|----|---|-------------|-----------------|
| E9PPN3_HUMAN (+1) | B7Z6W8_HUMAN |         | B7Z6W8 | P2X purinoceptor                                                                                                                                                                                                                                                                             | 40 kDa | 0.039 | 9   | 6   | 3   | 2  | 1  | 2  | 1  | 0  | 0  | 1  | 2  | - | 1.523695369 | 0% (0.31)       |
| A8K5B6_HUMAN (+2) | H0YNA7_HUMAN | SPPL2A  | H0YNA7 | Signal peptide peptidase-like 2A (Fragment)                                                                                                                                                                                                                                                  | 17 kDa | 0.052 | 9   | 6   | 3   | 1  | 2  | 2  | 1  | 0  | 0  | 3  | 0  | - | 1.523695369 | 0% (0.31)       |
| B2RBH6_HUMAN (+1) | B7Z966_HUMAN |         | B7Z966 | cDNA FLJ58410, highly similar to Solute carrier family 2, facilitated glucosetransporter member 3                                                                                                                                                                                            | 47 kDa | 0.13  | 9   | 6   | 3   | 0  | 3  | 3  | 0  | 0  | 1  | 0  | 2  | - | 1.523695369 | 0% (0.31)       |
| CTR2_HUMAN        | B3KWP3_HUMAN |         | B3KWP3 | cDNA FLJ43503 fis, clone PEBLM2006215, highly similar to Mitochondrial folate transporter/carrier                                                                                                                                                                                            | 34 kDa | 0.062 | 8   | 6   | 3   | 1  | 1  | 0  | 4  | 1  | 1  | 0  | 1  | - | 1.523695369 | 0% (0.31)       |
| G3V2F7_HUMAN      | B4DX69_HUMAN |         | B4DX69 | cDNA FLJ55158, highly similar to Thioredoxin, mitochondrial                                                                                                                                                                                                                                  | 22 kDa | 0.092 | 9   | 6   | 3   | 0  | 2  | 2  | 2  | 3  | 0  | 0  | 0  | - | 1.523695369 | 0% (0.31)       |
| B7ZKY2_HUMAN (+3) | NRAM1_HUMAN  | SLC11A1 | P49279 | Natural resistance-associated macrophage protein 1 (NRAMP 1) (Solute carrier family 11 member 1)                                                                                                                                                                                             | 60 kDa | 0.043 | 9   | 6   | 3   | 0  | 3  | 3  | 0  | 0  | 0  | 0  | 3  | - | 1.523695369 | 0% (0.31)       |
| A8K8K1_HUMAN (+1) | B2RB23_HUMAN |         | B2RB23 | cDNA, FLJ95265, highly similar to Homo sapiens acetyl-Coenzyme A acyltransferase 2 (mitochondrial 3-oxoacyl-Coenzyme A thiolase) (ACAA2), nuclear gene encoding mitochondrial protein, mRNA                                                                                                  | 42 kDa | 0.093 | 101 | 64  | 37  | 21 | 14 | 19 | 10 | 6  | 7  | 8  | 16 | - | 1.524085934 | 95% (0.022)     |
| B7Z8X5_HUMAN (+2) | GNAI2_HUMAN  | GNAI2   | P04899 | Guanine nucleotide-binding protein (G $\beta$ ) subunit alpha-2 (Adenylate cyclase-inhibiting G alpha protein)                                                                                                                                                                               | 40 kDa | 0.043 | 176 | 112 | 65  | 29 | 32 | 31 | 20 | 10 | 13 | 21 | 21 | - | 1.527586422 | 95% (0.0034)    |
| GLCE_HUMAN (+1)   | H0YL69_HUMAN | PSMA4   | H0YL69 | Proteasome subunit alpha type (EC 3.4.25.1) (Fragment)                                                                                                                                                                                                                                       | 26 kDa | 0.066 | 28  | 18  | 10  | 1  | 6  | 3  | 8  | 1  | 2  | 5  | 2  | - | 1.528447464 | 0% (0.16)       |
| MTR1_HUMAN        | H7BXZ6_HUMAN | RHOT1   | H7BXZ6 | Mitochondrial Rho GTPase (EC 3.6.5.-)                                                                                                                                                                                                                                                        | 68 kDa | 0.038 | 28  | 18  | 10  | 7  | 5  | 3  | 3  | 3  | 0  | 4  | 2  | - | 1.528447464 | 0% (0.16)       |
| B4DIB1_HUMAN (+3) | ANXA1_HUMAN  | ANXA1   | P04083 | Annexin A1 (Annexin I) (Annexin-1) (Calpactin II) (Calpactin-2) (Chromobindin-9) (Lipocortin I) (Phospholipase A2 inhibitory protein) (p25)                                                                                                                                                  | 39 kDa | 0.14  | 436 | 273 | 159 | 71 | 63 | 60 | 78 | 51 | 32 | 33 | 44 | - | 1.530433446 | 95% (< 0.00010) |
| PORED_HUMAN       | ARP2_HUMAN   | ACTR2   | P61160 | Actin-related protein 2 (Actin-like protein 2)                                                                                                                                                                                                                                               | 45 kDa | 0.072 | 140 | 90  | 52  | 20 | 24 | 27 | 20 | 16 | 15 | 11 | 11 | - | 1.531175916 | 95% (0.0076)    |
| RBM28_HUMAN       | VPP3_HUMAN   | TCIRG1  | Q13488 | V-type proton ATPase 116 kDa subunit a isoform 3 (V-ATPase 116 kDa isoform a3) (Osteoclastic proton pump 116 kDa subunit) (OC-116 kDa) (OC116) (T-cell immune regulator 1) (T-cell immune response cDNA7 protein) (TIRC7) (Vacuolar proton translocating ATPase 116 kDa subunit a isoform 3) | 93 kDa | 0.042 | 95  | 61  | 35  | 23 | 14 | 18 | 6  | 0  | 2  | 9  | 24 | - | 1.534219405 | 95% (0.023)     |
| D3DNT9_HUMAN (+1) | Q59H06_HUMAN |         | Q59H06 | Transporter 2, ATP-binding cassette, sub-family B isoform 1 variant (Fragment)                                                                                                                                                                                                               | 78 kDa | 0.045 | 76  | 49  | 28  | 8  | 12 | 10 | 20 | 0  | 6  | 11 | 11 | - | 1.534769173 | 95% (0.038)     |
| GOGA3_HUMAN       | G3V5Z7_HUMAN | PSMA6   | G3V5Z7 | Proteasome subunit alpha type (EC 3.4.25.1)                                                                                                                                                                                                                                                  | 28 kDa | 0.031 | 39  | 25  | 14  | 1  | 8  | 6  | 10 | 4  | 2  | 5  | 3  | - | 1.53760876  | 0% (0.11)       |
| GLNA_HUMAN        | B2R6U8_HUMAN |         | B2R6U8 | cDNA, FLJ93125, highly similar to Homo sapiens cleavage and polyadenylation specific factor 5, 25 kDa (CPSF5), mRNA                                                                                                                                                                          | 26 kDa | 0.088 | 39  | 25  | 14  | 2  | 6  | 8  | 10 | 1  | 2  | 9  | 2  | - | 1.53760876  | 0% (0.11)       |
| B2RAU5_HUMAN (+1) | SYNM_HUMAN   | NARS2   | Q96159 | Probable asparagine-tRNA ligase, mitochondrial (EC 6.1.1.22) (Asparaginyl-tRNA synthetase) (AsnRS)                                                                                                                                                                                           | 54 kDa | 0.097 | 20  | 13  | 7   | 3  | 5  | 4  | 1  | 4  | 0  | 1  | 2  | - | 1.54285126  | 0% (0.20)       |
| B3KMQ6_HUMAN      | VP26A_HUMAN  | VPS26A  | O75436 | Vacuolar protein sorting-associated protein 26A (Vesicle protein sorting 26A) (hVPS26)                                                                                                                                                                                                       | 38 kDa | 0.031 | 20  | 13  | 7   | 2  | 4  | 4  | 3  | 1  | 6  | 1  | 0  | - | 1.54285126  | 0% (0.20)       |

|                   |              |              |        |                                                                                                                                                                                                                  |         |       |     |     |    |    |    |    |    |   |    |    |    |   |     |
|-------------------|--------------|--------------|--------|------------------------------------------------------------------------------------------------------------------------------------------------------------------------------------------------------------------|---------|-------|-----|-----|----|----|----|----|----|---|----|----|----|---|-----|
| SCEL_HUMAN        | B7ZKM0_HUMAN | SART3        | B7ZKM0 | SART3 protein (Squamous cell carcinoma antigen recognized by T-cells 3)                                                                                                                                          | 106 kDa | 0.039 | 20  | 13  | 7  | 3  | 5  | 2  | 3  | 0 | 2  | 4  | 1  | - | 0%  |
| C2D1A_HUMAN       | COR1A_HUMAN  | CORO1A       | P31146 | Coronin-1A (Coronin-like protein A) (Clipin-A) (Coronin-like protein p57) (Tryptophan aspartate-containing coat protein) (TACO)                                                                                  | 51 kDa  | 0.032 | 20  | 13  | 7  | 0  | 4  | 5  | 4  | 0 | 2  | 3  | 2  | - | 0%  |
| GP110_HUMAN       | CB047_HUMAN  | C2orf47      | Q8WWC4 | Uncharacterized protein C2orf47, mitochondrial                                                                                                                                                                   | 33 kDa  | 0.03  | 31  | 20  | 11 | 5  | 4  | 3  | 7  | 1 | 5  | 3  | 2  | - | 0%  |
| IPRI_HUMAN        | DYSF_HUMAN   | DYSF         | O75923 | Dysferlin (Dystrophy-associated fer-1-like protein) (Fer-1-like protein 1)                                                                                                                                       | 237 kDa | 0.097 | 31  | 20  | 11 | 6  | 4  | 9  | 1  | 0 | 1  | 1  | 8  | - | 0%  |
| B4DKC8_HUMAN      | Q6ZS74_HUMAN | RALB         | Q6ZS74 | Ras-related protein Ral-B (Viral simian leukemia viral oncogene homolog B (Ras related GTP binding protein), isoform CRA_b) (cDNA FLJ45773 fis, clone NETFP2003448, highly similar to Ras-related protein RAL-B) | 26 kDa  | 0.033 | 75  | 48  | 27 | 19 | 9  | 9  | 11 | 3 | 9  | 3  | 12 | - | 95% |
| D6RE83_HUMAN (+1) | P4HA1_HUMAN  | P4HA1        | P13674 | Prolyl 4-hydroxylase subunit alpha-1 (4-PH alpha-1) (EC 1.14.11.2) (Procollagen-proline 2-oxoglutarate-4-dioxygenase subunit alpha-1)                                                                            | 61 kDa  | 0.2   | 171 | 109 | 62 | 16 | 37 | 40 | 16 | 6 | 22 | 22 | 12 | - | 95% |
| NDUB7_HUMAN       | I7EQF7_HUMAN | HLA-A        | I7EQF7 | MHC class I antigen (Fragment)                                                                                                                                                                                   | 32 kDa  | 0.18  | 97  | 62  | 35 | 0  | 16 | 15 | 25 | 0 | 0  | 15 | 0  | - | 95% |
| B3KUB9_HUMAN (+2) | SGPL1_HUMAN  | SGPL1        | O95470 | Sphingosine-1-phosphate lyase 1 (S1PL) (SP-lyase 1) (SPL 1) (hSPL) (EC 4.1.2.27) (Sphingosine-1-phosphate aldolase)                                                                                              | 64 kDa  | 0.065 | 76  | 50  | 28 | 25 | 3  | 7  | 14 | 1 | 3  | 12 | 12 | - | 95% |
| A8K5R6_HUMAN (+2) | CP2S1_HUMAN  | CYP2S1       | Q96SQ9 | Cytochrome P450 2S1 (EC 1.14.14.1) (CYP11S1)                                                                                                                                                                     | 56 kDa  | 0.18  | 45  | 29  | 16 | 17 | 6  | 5  | 1  | 3 | 4  | 1  | 8  | - | 0%  |
| B4DRE6_HUMAN (+2) | Q53GA0_HUMAN |              | Q53GA0 | Tumor protein D52-like 2 isoform e variant (Fragment)                                                                                                                                                            | 22 kDa  | 0.057 | 23  | 15  | 8  | 1  | 5  | 8  | 1  | 0 | 0  | 2  | 6  | - | 0%  |
| SYRM_HUMAN        | F8W6G1_HUMAN | NRBP1        | F8W6G1 | Nuclear receptor-binding protein                                                                                                                                                                                 | 61 kDa  | 0.042 | 23  | 15  | 8  | 1  | 7  | 5  | 2  | 3 | 3  | 0  | 2  | - | 0%  |
| AT1_HUMAN (+2)    | S12A7_HUMAN  | SLC12A7      | Q9Y666 | Solute carrier family 12 member 7 (Electroneutral potassium-chloride cotransporter 4) (K-Cl cotransporter 4)                                                                                                     | 119 kDa | 0.026 | 12  | 8   | 4  | 8  | 0  | 0  | 0  | 1 | 0  | 2  | 1  | - | 0%  |
| Q6AHZ7_HUMAN (+2) | F8VUJ3_HUMAN | POC1B-GALNT4 | F8VUJ3 | Protein POC1B-GALNT4                                                                                                                                                                                             | 66 kDa  | 0.02  | 12  | 8   | 4  | 1  | 2  | 4  | 1  | 0 | 2  | 1  | 1  | - | 0%  |
| SCRN1_HUMAN       | B3KRR1_HUMAN |              | B3KRR1 | cDNA FLJ34725 fis, clone MESAN2005958, highly similar to RNA-binding protein Luc7-like 2                                                                                                                         | 40 kDa  | 0.063 | 12  | 8   | 4  | 0  | 2  | 2  | 3  | 0 | 2  | 0  | 2  | - | 0%  |
| ABC3G_HUMAN (+3)  | CRKL_HUMAN   | CRKL         | P46109 | Crk-like protein                                                                                                                                                                                                 | 34 kDa  | 0.1   | 12  | 8   | 4  | 0  | 2  | 6  | 0  | 1 | 3  | 0  | 0  | - | 0%  |
| CADH6_HUMAN       | EPHA2_HUMAN  | EPHA2        | P29317 | Ephrin type-A receptor 2 (EC 2.7.10.1) (Epithelial cell kinase) (Tyrosine-protein kinase receptor ECK)                                                                                                           | 108 kDa | 0.042 | 12  | 8   | 4  | 6  | 1  | 1  | 0  | 4 | 0  | 0  | 0  | - | 0%  |
| Q4LE48_HUMAN (+2) | GPAA1_HUMAN  | GPAA1        | O43292 | Glycosylphosphatidylinositol anchor attachment 1 protein (GPI anchor attachment protein 1) (GAA1 protein homolog) (hGAA1)                                                                                        | 68 kDa  | 0.055 | 12  | 8   | 4  | 2  | 2  | 0  | 4  | 1 | 0  | 2  | 1  | - | 0%  |
| ATP9A_HUMAN (+1)  | A6XND9_HUMAN |              | A6XND9 | Beta-2-microglobulin                                                                                                                                                                                             | 12 kDa  | 0.061 | 12  | 8   | 4  | 1  | 2  | 1  | 4  | 0 | 0  | 1  | 3  | - | 0%  |
| COX20_HUMAN       | Q8N355_HUMAN | IGL@         | Q8N355 | IGL@ protein                                                                                                                                                                                                     | 25 kDa  | 0.22  | 12  | 8   | 4  | 0  | 4  | 2  | 2  | 0 | 0  | 2  | 2  | - | 0%  |
| B3KM57_HUMAN (+1) | TMM65_HUMAN  | TMEM65       | Q6PI78 | Transmembrane protein 65                                                                                                                                                                                         | 25 kDa  | 0.084 | 12  | 8   | 4  | 1  | 2  | 1  | 4  | 1 | 1  | 1  | 1  | - | 0%  |



|                   |              |               |        |                                                                                                                                                                                                                                                                                                  |         |       |     |    |    |    |    |    |    |    |    |    |   |   |             |              |
|-------------------|--------------|---------------|--------|--------------------------------------------------------------------------------------------------------------------------------------------------------------------------------------------------------------------------------------------------------------------------------------------------|---------|-------|-----|----|----|----|----|----|----|----|----|----|---|---|-------------|--------------|
| B4DYYS_HUMAN (+3) | DHPR_HUMAN   | QDPR          | P09417 | Dihydropteridine reductase (EC 1.5.1.34) (DHPR) (Quinoid dihydropteridine reductase)                                                                                                                                                                                                             | 26 kDa  | 0.024 | 12  | 8  | 4  | 1  | 3  | 3  | 1  | 0  | 4  | 0  | 0 | - | 1.573752429 | 0% (0.26)    |
| EF1B_HUMAN        | NUDC1_HUMAN  | NUDC1         | Q96RS6 | NudC domain-containing protein 1 (Chronic myelogenous leukemia tumor antigen 66) (Tumor antigen CML66)                                                                                                                                                                                           | 67 kDa  | 0.12  | 12  | 8  | 4  | 0  | 2  | 2  | 4  | 0  | 4  | 0  | 0 | - | 1.573752429 | 0% (0.26)    |
| Q53GC2_HUMAN (+1) | B3KMR6_HUMAN |               | B3KMR6 | cDNA FLJ12440 fis, clone NT2RM1000131, highly similar to Homo sapiens transmembrane protein 63A (TMEM63A), mRNA                                                                                                                                                                                  | 92 kDa  | 0.24  | 12  | 8  | 4  | 7  | 0  | 1  | 0  | 1  | 1  | 1  | 1 | - | 1.573752429 | 0% (0.26)    |
| B4DVL2_HUMAN (+2) | B4DZA5_HUMAN |               | B4DZA5 | Anoctamin                                                                                                                                                                                                                                                                                        | 108 kDa | 0.11  | 12  | 8  | 4  | 3  | 3  | 2  | 0  | 0  | 0  | 0  | 4 | - | 1.573752429 | 0% (0.26)    |
| LTOR5_HUMAN       | E5KLL9_HUMAN |               | E5KLL9 | Mitochondrial dynamin-like 120 kDa protein                                                                                                                                                                                                                                                       | 118 kDa | 0.37  | 117 | 75 | 42 | 26 | 20 | 14 | 15 | 15 | 6  | 15 | 9 | - | 1.575231157 | 95% (0.0095) |
| B4DWC4_HUMAN (+2) | Q7Z3K9_HUMAN | DKFZp781L0540 | Q7Z3K9 | Putative uncharacterized protein DKFZp781L0540 (Fragment)                                                                                                                                                                                                                                        | 90 kDa  | 0.2   | 37  | 24 | 13 | 5  | 7  | 5  | 6  | 5  | 0  | 5  | 4 | - | 1.582827421 | 0% (0.098)   |
| DNLZ_HUMAN        | SCRIB_HUMAN  | SCRIB         | Q14160 | Protein scribble homolog (Scribble) (hScrib) (Protein LAP4)                                                                                                                                                                                                                                      | 175 kDa | 0.051 | 36  | 24 | 13 | 8  | 4  | 4  | 7  | 7  | 2  | 3  | 1 | - | 1.582827421 | 0% (0.098)   |
| H9NTY4_HUMAN (+1) | RS11_HUMAN   | RPS11         | P62280 | 40S ribosomal protein S11                                                                                                                                                                                                                                                                        | 18 kDa  | 0.082 | 51  | 33 | 18 | 8  | 8  | 7  | 11 | 7  | 4  | 5  | 2 | - | 1.589409787 | 0% (0.060)   |
| B3KWP3_HUMAN (+2) | HS105_HUMAN  | HSPH1         | Q92598 | Heat shock protein 105 kDa (Antigen NY-CO-25) (Heat shock 110 kDa protein)                                                                                                                                                                                                                       | 97 kDa  | 0.1   | 104 | 67 | 37 | 6  | 21 | 22 | 18 | 13 | 13 | 8  | 3 | - | 1.594220348 | 95% (0.012)  |
| Q5S9Q5_HUMAN      | PSB3_HUMAN   | PSMB3         | P49720 | Proteasome subunit beta type-3 (EC 3.4.25.1) (Proteasome chain 13) (Proteasome component C10-II) (Proteasome theta chain)                                                                                                                                                                        | 23 kDa  | 0.075 | 40  | 26 | 14 | 4  | 5  | 8  | 9  | 1  | 4  | 7  | 2 | - | 1.596204846 | 0% (0.084)   |
| LYPL1_HUMAN       | Q8N7G1_HUMAN |               | Q8N7G1 | Purine nucleoside phosphorylase (EC 2.4.2.1) (Inosine-guanosine phosphorylase)                                                                                                                                                                                                                   | 33 kDa  | 0.11  | 40  | 26 | 14 | 1  | 7  | 8  | 10 | 5  | 0  | 5  | 4 | - | 1.596204846 | 0% (0.084)   |
| B3KRS5_HUMAN (+2) | B4DRT4_HUMAN |               | B4DRT4 | cDNA FLJ51535, highly similar to Phosphatidylethanolamine-binding protein 1                                                                                                                                                                                                                      | 17 kDa  | 0.16  | 40  | 26 | 14 | 4  | 3  | 6  | 13 | 5  | 3  | 5  | 1 | - | 1.596204846 | 0% (0.084)   |
| IMA4_HUMAN (+1)   | B4DV28_HUMAN |               | B4DV28 | cDNA FLJ54170, highly similar to Cytosolic nonspecific dipeptidase                                                                                                                                                                                                                               | 52 kDa  | 0.086 | 95  | 60 | 33 | 14 | 15 | 13 | 19 | 6  | 11 | 10 | 6 | - | 1.59774902  | 95% (0.016)  |
| B3KQ71_HUMAN (+4) | J3KP14_HUMAN | VPS13D        | J3KP14 | Vacuolar protein sorting-associated protein 13D                                                                                                                                                                                                                                                  | 492 kDa | 0.11  | 2   | 1  | 0  | 0  | 1  | 1  | 0  | 0  | 0  | 0  | 0 | - | 1.607727417 | 0% (0.53)    |
| SPX2_HUMAN        | MISP_HUMAN   | MISP          | Q8IVT2 | Mitotic interactor and substrate of PLK1 (Mitotic spindle positioning protein)                                                                                                                                                                                                                   | 75 kDa  | 0.054 | 1   | 1  | 0  | 2  | 0  | 0  | 0  | 0  | 0  | 0  | 0 | - | 1.607727417 | 0% (0.53)    |
| Q8WY67_HUMAN (+1) | F263_HUMAN   | PFKFB3        | Q16875 | 6-phosphofructo-2-kinase/fructose-2,6-bisphosphatase 3 (6PF-2-K/Fru-2,6-P2ase 3) (PFK/FBPhase 3) (6PF-2-K/Fru-2,6-P2ase brain/placenta-type isozyme) (Renal carcinoma antigen NY-REN-56) (iPFK-2) [Includes: 6-phosphofructo-2-kinase (EC 2.7.1.105); Fructose-2,6-bisphosphatase (EC 3.1.3.46)] | 60 kDa  | 0.17  | 1   | 1  | 0  | 0  | 0  | 0  | 2  | 0  | 0  | 0  | 0 | - | 1.607727417 | 0% (0.53)    |
| CSN5_HUMAN        | B2RDI6_HUMAN |               | B2RDI6 | cDNA, FLJ96628, highly similar to Homo sapiens mitogen-activated protein kinase kinase 11(MAP3K11), mRNA                                                                                                                                                                                         | 93 kDa  | 0.11  | 2   | 1  | 0  | 1  | 0  | 1  | 0  | 0  | 0  | 0  | 0 | - | 1.607727417 | 0% (0.53)    |
| TBK1_HUMAN        | A2VDI4_HUMAN | EFR3A         | A2VDI4 | EFR3A protein (Fragment)                                                                                                                                                                                                                                                                         | 76 kDa  | 0.064 | 2   | 1  | 0  | 1  | 1  | 0  | 0  | 0  | 0  | 0  | 0 | - | 1.607727417 | 0% (0.53)    |
| F5H5M9_HUMAN (+2) | EIF1_HUMAN   | EIF1          | P41567 | Eukaryotic translation initiation factor 1 (eIF1) (A121) (Protein translation factor SUI1 homolog) (Sui1iso1)                                                                                                                                                                                    | 13 kDa  | 0.02  | 2   | 1  | 0  | 0  | 0  | 0  | 1  | 0  | 0  | 0  | 0 | - | 1.607727417 | 0% (0.53)    |

|                   |              |         |        |                                                                                                                                                                                                                                                                                                                                                              |         |       |     |     |    |    |    |    |    |    |    |   |    |    |    |                 |                  |                |
|-------------------|--------------|---------|--------|--------------------------------------------------------------------------------------------------------------------------------------------------------------------------------------------------------------------------------------------------------------------------------------------------------------------------------------------------------------|---------|-------|-----|-----|----|----|----|----|----|----|----|---|----|----|----|-----------------|------------------|----------------|
| E9PS41_HUMAN (+1) | B2RDG1_HUMAN |         | B2RDG1 | cDNA, FLJ96593                                                                                                                                                                                                                                                                                                                                               | 59 kDa  | 0.088 | 1   | 1   | 0  | 2  | 0  | 0  | 0  | 0  | 0  | 0 | 0  | 0  | 0  | 1.6077274<br>17 | 0%<br>(0.53)     |                |
| B4DX69_HUMAN (+2) | C9JFX4_HUMAN | SIGIRR  | C9JFX4 | Single Ig IL-1-related receptor                                                                                                                                                                                                                                                                                                                              | 55 kDa  | 0.081 | 1   | 1   | 0  | 2  | 0  | 0  | 0  | 0  | 0  | 0 | 0  | 0  | 0  | 1.6077274<br>17 | 0%<br>(0.53)     |                |
| E9PHV4_HUMAN (+1) | Q59F44_HUMAN |         | Q59F44 | Cytochrome b-5 isoform 1 variant (Fragment)                                                                                                                                                                                                                                                                                                                  | 15 kDa  | 0.28  | 15  | 10  | 5  | 2  | 3  | 3  | 2  | 0  | 3  | 1 | 1  | 1  | 1  | 1.6077976<br>98 | 0%<br>(0.21)     |                |
| B3KSG7_HUMAN (+2) | Q5LJA0_HUMAN | TROVE2  | Q5LJA0 | 60 kDa SS-A/Ro ribonucleoprotein (TROVE domain family, member 2, isoform CRA_e)                                                                                                                                                                                                                                                                              | 59 kDa  | 0.042 | 15  | 10  | 5  | 1  | 2  | 3  | 5  | 1  | 3  | 1 | 0  | 0  | 0  | 1.6077976<br>98 | 0%<br>(0.21)     |                |
| MECR_HUMAN        | SMD2_HUMAN   | SNRPD2  | P62316 | Small nuclear ribonucleoprotein Sm D2 (SMD2) (snRNP core protein D2)                                                                                                                                                                                                                                                                                         | 14 kDa  | 0.067 | 15  | 10  | 5  | 1  | 2  | 1  | 6  | 1  | 1  | 2 | 1  | 1  | 1  | 1.6077976<br>98 | 0%<br>(0.21)     |                |
| HSP72_HUMAN       | A8K5B0_HUMAN |         | A8K5B0 | cDNA FLJ75682, highly similar to Homo sapiens armadillo repeat containing, X-linked 3 (ARMCX3), transcript variant 1, mRNA                                                                                                                                                                                                                                   | 43 kDa  | 0.23  | 15  | 10  | 5  | 10 | 0  | 0  | 0  | 0  | 0  | 3 | 2  | 2  | 2  | 1.6077976<br>98 | 0%<br>(0.21)     |                |
| SERP3_HUMAN       | ETHE1_HUMAN  | ETHE1   | O95571 | Persulfide dioxygenase ETHE1, mitochondrial (EC 1.13.11.18) (Ethylmalonic encephalopathy protein 1) (Hepatoma subtracted clone one protein) (Sulfur dioxygenase ETHE1)                                                                                                                                                                                       | 28 kDa  | 0.047 | 29  | 19  | 10 | 6  | 4  | 6  | 4  | 1  | 2  | 3 | 4  | 4  | 4  | 1.6078679<br>95 | 0%<br>(0.12)     |                |
| DHRXS_HUMAN       | C9JVN9_HUMAN | L2HGDH  | C9JVN9 | L-2-hydroxyglutarate dehydrogenase, mitochondrial                                                                                                                                                                                                                                                                                                            | 48 kDa  | 0.16  | 31  | 19  | 10 | 5  | 5  | 5  | 4  | 8  | 2  | 1 | 1  | 1  | 1  | 1.6078679<br>95 | 0%<br>(0.12)     |                |
| GATA_HUMAN        | SORL_HUMAN   | SORL1   | Q92673 | Sortilin-related receptor (Low-density lipoprotein receptor relative with 11 ligand-binding repeats) (LDLR relative with 11 ligand-binding repeats) (LR1) (SorLA-1) (Sorting protein-related receptor containing LDLR class A repeats) (SorLA)                                                                                                               | 248 kDa | 0.12  | 29  | 19  | 10 | 12 | 2  | 5  | 0  | 3  | 1  | 4 | 2  | 2  | 2  | 1.6078679<br>95 | 0%<br>(0.12)     |                |
| Q5LJA9_HUMAN      | RRAS_HUMAN   | RRAS    | P10301 | Ras-related protein R-Ras (p23)                                                                                                                                                                                                                                                                                                                              | 23 kDa  | 0.098 | 43  | 28  | 15 | 9  | 7  | 6  | 6  | 3  | 3  | 6 | 4  | 4  | 4  | 1.6079383<br>08 | 0%<br>(0.073)    |                |
| NRAM1_HUMAN       | HUWE1_HUMAN  | HUWE1   | Q7Z6Z7 | E3 ubiquitin-protein ligase HUWE1 (EC 6.3.2.-) (ARF-binding protein 1) (ARF-BP1) (HECT, UBA and WWE domain-containing protein 1) (Homologous to E6AP carboxyl terminus homologous protein 9) (HectH9) (Large structure of UREB1) (LASU1) (Mcl-1 ubiquitin ligase E3) (Mule) (Upstream regulatory element-binding protein 1) (URE-B1) (URE-binding protein 1) | 482 kDa | 0.051 | 74  | 48  | 26 | 0  | 16 | 15 | 15 | 5  | 15 | 6 | 1  | 1  | 1  | 1               | 1.6146541<br>61  | 95%<br>(0.025) |
| TB182_HUMAN       | NPC1_HUMAN   | NPC1    | O15118 | Niemann-Pick C1 protein                                                                                                                                                                                                                                                                                                                                      | 142 kDa | 0.018 | 46  | 30  | 16 | 17 | 7  | 6  | 0  | 2  | 1  | 2 | 11 | 11 | 11 | 1.6183137<br>14 | 0%<br>(0.063)    |                |
| NUDT9_HUMAN (+1)  | HTAI2_HUMAN  | HTATIP2 | Q9BUP3 | Oxidoreductase HTATIP2 (EC 1.1.1.-) (30 kDa HIV-1 TAT-interacting protein) (HIV-1 TAT-interacting protein 2)                                                                                                                                                                                                                                                 | 27 kDa  | 0.074 | 32  | 21  | 11 | 6  | 6  | 5  | 4  | 2  | 3  | 2 | 4  | 4  | 4  | 1.6224701<br>91 | 0%<br>(0.10)     |                |
| SPG21_HUMAN       | Q53FN0_HUMAN |         | Q53FN0 | Splicing factor, arginine/serine-rich 2 variant (Fragment)                                                                                                                                                                                                                                                                                                   | 26 kDa  | 0.14  | 32  | 21  | 11 | 2  | 8  | 5  | 6  | 2  | 1  | 4 | 4  | 4  | 4  | 1.6224701<br>91 | 0%<br>(0.10)     |                |
| B2R514_HUMAN (+2) | Q6ZQN2_HUMAN |         | Q6ZQN2 | cDNA FLJ46846 fis, clone UTERU3004635, moderately similar to Neuroblast differentiation associated protein AHNAK (Fragment)                                                                                                                                                                                                                                  | 181 kDa | 0.15  | 228 | 147 | 80 | 50 | 45 | 35 | 19 | 34 | 0  | 0 | 22 | 22 | 22 | 1.6308972<br>69 | 95%<br>(0.00014) |                |
| ACOC_HUMAN        | RAD50_HUMAN  | RAD50   | Q92878 | DNA repair protein RAD50 (hRAD50) (EC 3.6.-.-)                                                                                                                                                                                                                                                                                                               | 154 kDa | 0.028 | 18  | 12  | 6  | 1  | 1  | 5  | 5  | 1  | 0  | 3 | 2  | 2  | 2  | 1.6324567<br>45 | 0%<br>(0.18)     |                |
| B4DMR3_HUMAN (+1) | VAC14_HUMAN  | VAC14   | Q08AM6 | Protein VAC14 homolog (Tax1-binding protein 2)                                                                                                                                                                                                                                                                                                               | 88 kDa  | 0.14  | 19  | 12  | 6  | 2  | 5  | 5  | 0  | 0  | 4  | 0 | 2  | 2  | 2  | 1.6324567<br>45 | 0%<br>(0.18)     |                |

|                  |              |         |        |                                                                                                                                                                                                                                                   |         |       |     |     |     |     |    |    |     |    |    |    |    |   |     |
|------------------|--------------|---------|--------|---------------------------------------------------------------------------------------------------------------------------------------------------------------------------------------------------------------------------------------------------|---------|-------|-----|-----|-----|-----|----|----|-----|----|----|----|----|---|-----|
| B7Z8W3_HUMAN(+1) | Q6LEU8_HUMAN | SPINT2  | Q6LEU8 | SPINT2 protein (Fragment)                                                                                                                                                                                                                         | 28 kDa  | 0.024 | 18  | 12  | 6   | 1   | 2  | 3  | 6   | 1  | 0  | 3  | 2  | - | 0%  |
| AK1C1_HUMAN      | GALE_HUMAN   | GALE    | Q14376 | UDP-glucose 4-epimerase (EC 5.1.3.2) (Galactowaldenase) (UDP-galactose 4-epimerase)                                                                                                                                                               | 38 kDa  | 0.14  | 18  | 12  | 6   | 1   | 0  | 0  | 11  | 2  | 4  | 0  | 0  | - | 0%  |
| GLE1_HUMAN       | B2R983_HUMAN |         | B2R983 | cDNA, FLJ94267, highly similar to Homo sapiens glutathione S-transferase omega 1 (GSTO1), mRNA                                                                                                                                                    | 28 kDa  | 0.063 | 18  | 12  | 6   | 2   | 5  | 2  | 3   | 0  | 4  | 1  | 2  | - | 0%  |
| G3V207_HUMAN(+1) | PYRD_HUMAN   | DHODH   | Q02127 | Dihydroorotate dehydrogenase (quinone), mitochondrial (DHodehase) (EC 1.3.5.2) (Dihydroorotate oxidase)                                                                                                                                           | 43 kDa  | 0.12  | 18  | 12  | 6   | 3   | 4  | 3  | 2   | 2  | 1  | 1  | 2  | - | 0%  |
| H7C417_HUMAN     | J3K173_HUMAN | RPL38   | J3K173 | 60S ribosomal protein L38                                                                                                                                                                                                                         | 8 kDa   | 0.074 | 35  | 23  | 12  | 4   | 4  | 4  | 11  | 3  | 4  | 1  | 4  | - | 0%  |
| FKB1A_HUMAN      | Q53HQ0_HUMAN |         | Q53HQ0 | Flotillin 1 variant (Fragment)                                                                                                                                                                                                                    | 47 kDa  | 0.25  | 109 | 71  | 38  | 31  | 12 | 11 | 17  | 4  | 11 | 11 | 12 | - | 95% |
| D39U1_HUMAN      | D3DUE6_HUMAN | N-PAC   | D3DUE6 | Cytokine-like nuclear factor n-pac, isoform CRA_c                                                                                                                                                                                                 | 61 kDa  | 0.11  | 21  | 14  | 7   | 2   | 4  | 2  | 6   | 0  | 0  | 5  | 2  | - | 0%  |
| PEX16_HUMAN      | E7EQT4_HUMAN | ACIN1   | E7EQT4 | Apoptotic chromatin condensation inducer in the nucleus                                                                                                                                                                                           | 147 kDa | 0.068 | 21  | 14  | 7   | 5   | 3  | 2  | 4   | 2  | 2  | 1  | 2  | - | 0%  |
| B4DNC0_HUMAN(+1) | TMOD1_HUMAN  | TMOD1   | P28289 | Tropomodulin-1 (Erythrocyte tropomodulin) (E-Tmod)                                                                                                                                                                                                | 41 kDa  | 0.15  | 21  | 14  | 7   | 3   | 7  | 5  | 0   | 4  | 0  | 2  | 1  | - | 0%  |
| E9PBR6_HUMAN(+1) | LTOR3_HUMAN  | LAMTOR3 | Q9UHA4 | Ragulator complex protein LAMTOR3 (Late endosomal/lysosomal adaptor and MAPK and MTOR activator 3) (MEK-binding partner 1) (Mpl) (Mitogen-activated protein kinase 1-interacting protein 1) (Mitogen-activated protein kinase scaffold protein 1) | 14 kDa  | 0.044 | 21  | 14  | 7   | 3   | 7  | 2  | 2   | 1  | 1  | 1  | 4  | - | 0%  |
| RET1_HUMAN       | B3KWW5_HUMAN |         | B3KWW5 | Galectin                                                                                                                                                                                                                                          | 36 kDa  | 0.37  | 21  | 14  | 7   | 4   | 2  | 2  | 6   | 0  | 0  | 2  | 5  | - | 0%  |
| ANFY1_HUMAN      | ALG11_HUMAN  | ALG11   | Q2TAA5 | GDP-Mann:Man(3)GlcNAc(2)-PP-Dol alpha-1,2-mannosyltransferase (EC 2.4.1.131) (Asparagine-linked glycosylation protein 11 homolog) (Glycolipid 2-alpha-mannosyltransferase)                                                                        | 56 kDa  | 0.015 | 21  | 14  | 7   | 6   | 5  | 2  | 1   | 1  | 2  | 2  | 2  | - | 0%  |
| A8K9V9_HUMAN(+1) | B2R7T8_HUMAN |         | B2R7T8 | cDNA, FLJ93598, highly similar to Homo sapiens capping protein (actin filament) muscle Z-line, beta (CAPZB), mRNA                                                                                                                                 | 31 kDa  | 0.1   | 42  | 27  | 14  | 3   | 5  | 9  | 10  | 10 | 2  | 2  | 0  | - | 0%  |
| Q0P5W4_HUMAN     | ANXA2_HUMAN  | ANXA2   | P07355 | Annexin A2 (Annexin II) (Annexin-2) (Calpactin I heavy chain) (Calpactin-1 heavy chain) (Chromobindin-8) (Lipocortin II) (Placental anticoagulant protein IV) (PAP-IV) (Protein I) (p36)                                                          | 39 kDa  | 0.082 | 819 | 534 | 288 | 248 | 97 | 89 | 101 | 67 | 50 | 78 | 94 | - | 95% |
| ATG3_HUMAN       | H2AW_HUMAN   | H2AFY2  | Q9P0M6 | Core histone macro-H2A.2 (Histone macroH2A2) (mH2A2)                                                                                                                                                                                              | 40 kDa  | 0.12  | 103 | 68  | 36  | 32  | 9  | 9  | 19  | 9  | 7  | 10 | 10 | - | 95% |
| B4E0E0_HUMAN(+1) | B3KMB8_HUMAN |         | B3KMB8 | cDNA FLJ10654 fis, clone NT2RP2005901, highly similar to FAST kinase domains-containing protein 2                                                                                                                                                 | 81 kDa  | 0.045 | 24  | 16  | 8   | 3   | 7  | 3  | 3   | 1  | 4  | 4  | 0  | - | 0%  |
| INT3_HUMAN       | PIGT_HUMAN   | PIGT    | Q969N2 | GPI transamidase component PIG-T (Phosphatidylinositol-glycan biosynthesis class T protein)                                                                                                                                                       | 66 kDa  | 0.031 | 24  | 16  | 8   | 4   | 4  | 3  | 5   | 3  | 0  | 3  | 2  | - | 0%  |
| ABCA1_HUMAN(+2)  | PPA5_HUMAN   | ACP5    | P13686 | Tartrate-resistant acid phosphatase type 5 (TR-AP) (EC 3.1.3.2) (Tartrate-resistant acid ATPase) (TRATPase) (Type 5 acid phosphatase)                                                                                                             | 37 kDa  | 0.01  | 24  | 16  | 8   | 1   | 6  | 7  | 2   | 0  | 2  | 0  | 6  | - | 0%  |

|                   |              |         |        |                                                                                                                                                                                     |         |       |    |    |    |    |   |    |   |   |   |    |   |   |     |
|-------------------|--------------|---------|--------|-------------------------------------------------------------------------------------------------------------------------------------------------------------------------------------|---------|-------|----|----|----|----|---|----|---|---|---|----|---|---|-----|
| ARHG2_HUMAN       | RL35_HUMAN   | RPL35   | P42766 | 60S ribosomal protein L35                                                                                                                                                           | 15 kDa  | 0.023 | 24 | 16 | 8  | 3  | 4 | 3  | 6 | 2 | 2 | 2  | 2 | - | 0%  |
| 2BIG_HUMAN        | A8MXB9_HUMAN | SUMF2   | A8MXB9 | Sulfatase-modifying factor 2                                                                                                                                                        | 34 kDa  | 0.26  | 24 | 16 | 8  | 2  | 3 | 5  | 6 | 1 | 2 | 3  | 2 | - | 0%  |
| Q8WVC2_HUMAN (+2) | TRA2A_HUMAN  | TRA2A   | Q13595 | Transformer-2 protein homolog alpha (TRA-2 alpha) (TRA2-alpha) (Transformer-2 protein homolog A)                                                                                    | 33 kDa  | 0.41  | 24 | 16 | 8  | 4  | 3 | 4  | 5 | 2 | 3 | 2  | 1 | - | 0%  |
| Q5U0F7_HUMAN      | B4DZ88_HUMAN | KTN1    | B4DZ88 | KTN1 protein (cDNA FLJ61494, highly similar to Kinectin)                                                                                                                            | 153 kDa | 0.077 | 46 | 31 | 16 | 4  | 8 | 14 | 5 | 4 | 0 | 12 | 0 | - | 95% |
| RPRD2_HUMAN       | E7EW20_HUMAN | MYO6    | E7EW20 | Unconventional myosin-VI                                                                                                                                                            | 149 kDa | 0.037 | 49 | 33 | 17 | 17 | 5 | 6  | 4 | 2 | 5 | 6  | 4 | - | 95% |
| SUSD2_HUMAN       | PSA3_HUMAN   | PSMA3   | P25788 | Proteasome subunit alpha type-3 (EC 3.4.25.1) (Macropain subunit C8) (Multicatalytic endopeptidase complex subunit C8) (Proteasome component C8)                                    | 28 kDa  | 0.064 | 29 | 18 | 9  | 1  | 4 | 5  | 8 | 3 | 1 | 4  | 1 | - | 0%  |
| PPIG_HUMAN        | TCRG1_HUMAN  | TCERG1  | O14776 | Transcription elongation regulator 1 (TATA box-binding protein-associated factor 25) (Transcription factor C2A150)                                                                  | 124 kDa | 0.052 | 4  | 3  | 1  | 0  | 1 | 0  | 2 | 0 | 0 | 1  | 0 | - | 0%  |
| ANR22_HUMAN       | A8K5X9_HUMAN |         | A8K5X9 | cDNA FLJ77989, highly similar to Homo sapiens RNA binding motif protein 19, mRNA (cDNA FLJ95445, highly similar to Homo sapiens RNA binding motif protein 19 (RBM19), mRNA)         | 107 kDa | 0.15  | 4  | 3  | 1  | 0  | 0 | 0  | 3 | 0 | 0 | 1  | 0 | - | 0%  |
| MDC1_HUMAN        | B4E1A5_HUMAN |         | B4E1A5 | cDNA FLJ59652, highly similar to Thyroid hormone receptor-associated protein complex 100 kDa component                                                                              | 100 kDa | 0.02  | 4  | 3  | 1  | 1  | 1 | 1  | 0 | 0 | 0 | 0  | 1 | - | 0%  |
| DOCK2_HUMAN       | COIA1_HUMAN  | COL18A1 | P39060 | Collagen alpha-1(XVIII) chain [Cleaved into: Endostatin]                                                                                                                            | 178 kDa | 0.015 | 4  | 3  | 1  | 2  | 1 | 0  | 0 | 0 | 1 | 0  | 0 | - | 0%  |
| A8K245_HUMAN (+1) | B4DGX2_HUMAN | PIP4K2A | B4DGX2 | Phosphatidylinositol 5-phosphate 4-kinase type-2 alpha (cDNA FLJ53867, highly similar to Phosphatidylinositol-4-phosphate 5-kinase type-2 alpha (EC 2.7.1.68))                      | 40 kDa  | 0.081 | 4  | 3  | 1  | 0  | 2 | 0  | 1 | 0 | 0 | 0  | 1 | - | 0%  |
| C9JEJ2_HUMAN (+1) | P3C2A_HUMAN  | PIK3C2A | O00443 | Phosphatidylinositol 4-phosphate 3-kinase C2 domain-containing subunit alpha (PI3K-C2-alpha) (PtdIns-3-kinase C2 subunit alpha) (EC 2.7.1.154) (Phosphoinositide 3-kinase-C2-alpha) | 191 kDa | 0.13  | 5  | 3  | 1  | 0  | 1 | 2  | 0 | 0 | 0 | 1  | 0 | - | 0%  |
| F5H7V7_HUMAN (+1) | B2RAU5_HUMAN |         | B2RAU5 | Sorting nexin                                                                                                                                                                       | 67 kDa  | 0.16  | 4  | 3  | 1  | 2  | 0 | 1  | 0 | 0 | 1 | 0  | 0 | - | 0%  |
| ACSA_HUMAN (+3)   | DHRXS_HUMAN  | DHRXS   | Q8NS14 | Dehydrogenase/reductase SDR family member on chromosome X (EC 1.1.-.-) (DHRSSXY)                                                                                                    | 36 kDa  | 0.07  | 4  | 3  | 1  | 3  | 0 | 0  | 0 | 0 | 0 | 0  | 1 | - | 0%  |
| A8K6U0_HUMAN (+2) | ANFY1_HUMAN  | ANKFY1  | Q9P2R3 | Ankyrin repeat and FYVE domain-containing protein 1 (Ankyrin repeats hooked to a zinc finger motif)                                                                                 | 128 kDa | 0.056 | 5  | 3  | 1  | 0  | 1 | 1  | 1 | 0 | 1 | 0  | 0 | - | 0%  |
| HPDL_HUMAN        | RIC8A_HUMAN  | RIC8A   | Q9NPQ8 | Synembryn-A (Protein Ric-8A)                                                                                                                                                        | 60 kDa  | 0.049 | 4  | 3  | 1  | 0  | 1 | 0  | 2 | 0 | 1 | 0  | 0 | - | 0%  |
| B7Z2R7_HUMAN      | Q12915_HUMAN | Ibd1    | Q12915 | Ibd1 protein (Fragment)                                                                                                                                                             | 22 kDa  | 0.082 | 3  | 3  | 1  | 0  | 0 | 1  | 1 | 0 | 1 | 0  | 0 | - | 0%  |
| ADDG_HUMAN (+1)   | FARP1_HUMAN  | FARP1   | Q9Y4F1 | FERM, RhoGEF and pleckstrin domain-containing protein 1 (Chondrocyte-derived ezrin-like protein) (Pleckstrin homology domain-containing family C member)                            | 119 kDa | 0.042 | 4  | 3  | 1  | 0  | 2 | 1  | 0 | 0 | 0 | 1  | 0 | - | 0%  |

|                   |              |         |        |                                                                                                                                                                                |         |       |   |   |   |   |   |   |   |   |   |   |   |   |   |                      |              |
|-------------------|--------------|---------|--------|--------------------------------------------------------------------------------------------------------------------------------------------------------------------------------|---------|-------|---|---|---|---|---|---|---|---|---|---|---|---|---|----------------------|--------------|
|                   |              |         |        | 2) (PH domain-containing family C member 2)                                                                                                                                    |         |       |   |   |   |   |   |   |   |   |   |   |   |   |   |                      |              |
| CUL3_HUMAN (+1)   | PI42C_HUMAN  | PIP4K2C | Q8TBX8 | Phosphatidylinositol 5-phosphate 4-kinase type-2 gamma (EC 2.7.1.149) (Phosphatidylinositol 5-phosphate 4-kinase type II gamma) (PI(5)P 4-kinase type II gamma) (PIP4KI-gamma) | 47 kDa  | 0.049 | 4 | 3 | 1 | 0 | 2 | 0 | 1 | 0 | 1 | 0 | 0 | 0 | 0 | -<br>1.6871404<br>48 | 0%<br>(0.36) |
| 6PGL_HUMAN        | CP4X1_HUMAN  | CYP4X1  | Q8N118 | Cytochrome P450 4X1 (EC 1.14.14.1) (CYP4X1)                                                                                                                                    | 59 kDa  | 0.17  | 4 | 3 | 1 | 0 | 3 | 0 | 0 | 0 | 1 | 0 | 0 | 0 | 0 | -<br>1.6871404<br>48 | 0%<br>(0.36) |
| MTER1_HUMAN       | AGM1_HUMAN   | PGM3    | O95394 | Phosphoacetylglucosamine mutase (PAGM) (EC 5.4.2.3) (Acetylglucosamine phosphomutase) (N-acetylglucosamine-phosphate mutase) (Phosphoglucosaminase-3) (PGM 3)                  | 60 kDa  | 0.053 | 5 | 3 | 1 | 1 | 1 | 0 | 2 | 0 | 1 | 0 | 0 | 0 | 0 | -<br>1.6871404<br>48 | 0%<br>(0.36) |
| SNX27_HUMAN       | LRC8C_HUMAN  | LRRC8C  | Q8TDW0 | Leucine-rich repeat-containing protein 8C (Factor for adipocyte differentiation 158)                                                                                           | 92 kDa  | 0.041 | 4 | 3 | 1 | 0 | 2 | 1 | 0 | 0 | 0 | 1 | 0 | 0 | 0 | -<br>1.6871404<br>48 | 0%<br>(0.36) |
| ECSIT_HUMAN       | J3QRV5_HUMAN | LLGL2   | J3QRV5 | Lethal(2) giant larvae protein homolog 2                                                                                                                                       | 113 kDa | 0.074 | 4 | 3 | 1 | 1 | 0 | 0 | 2 | 0 | 1 | 0 | 0 | 0 | 0 | -<br>1.6871404<br>48 | 0%<br>(0.36) |
| ATAD5_HUMAN       | CC127_HUMAN  | CCDC127 | Q96BQ5 | Coiled-coil domain-containing protein 127                                                                                                                                      | 31 kDa  | 0.014 | 4 | 3 | 1 | 2 | 0 | 0 | 1 | 0 | 0 | 1 | 0 | 0 | 0 | -<br>1.6871404<br>48 | 0%<br>(0.36) |
| E9PIN3_HUMAN      | MAN1_HUMAN   | LEMD3   | Q9Y2U8 | Inner nuclear membrane protein Man1 (LEM domain-containing protein 3)                                                                                                          | 100 kDa | 0.068 | 4 | 3 | 1 | 2 | 0 | 1 | 0 | 0 | 0 | 1 | 0 | 0 | 0 | -<br>1.6871404<br>48 | 0%<br>(0.36) |
| SYNE3_HUMAN       | B2RAW1_HUMAN |         | B2RAW1 | cDNA FLJ95155, highly similar to Homo sapiens Bruton agammaglobulinemia tyrosine kinase (BTK), mRNA                                                                            | 76 kDa  | 0.027 | 4 | 3 | 1 | 0 | 1 | 1 | 1 | 1 | 0 | 1 | 0 | 0 | 0 | -<br>1.6871404<br>48 | 0%<br>(0.36) |
| B2RDR4_HUMAN      | GNP1_HUMAN   | GNPDA1  | P46926 | Glucosamine-6-phosphate isomerase 1 (EC 3.5.99.6) (Glucosamine-6-phosphate deaminase 1) (GNPDA 1) (GlcN6P deaminase 1) (Oscillin)                                              | 33 kDa  | 0.12  | 4 | 3 | 1 | 0 | 2 | 1 | 0 | 1 | 0 | 0 | 0 | 0 | 0 | -<br>1.6871404<br>48 | 0%<br>(0.36) |
| FUBP3_HUMAN       | F8W8C2_HUMAN | VEZT    | F8W8C2 | Vezeatin (Fragment)                                                                                                                                                            | 82 kDa  | 0.093 | 4 | 3 | 1 | 3 | 0 | 0 | 0 | 0 | 0 | 1 | 0 | 0 | 0 | -<br>1.6871404<br>48 | 0%<br>(0.36) |
| AT8B1_HUMAN       | TRM6_HUMAN   | TRMT6   | Q9UIA5 | tRNA (adenine(58)-N(1))-methyltransferase non-catalytic subunit TRM6 (tRNA(m1A58)-methyltransferase subunit TRM6) (tRNA(m1A58)MTase subunit TRM6)                              | 56 kDa  | 0.026 | 4 | 3 | 1 | 0 | 0 | 0 | 3 | 1 | 0 | 0 | 0 | 0 | 0 | -<br>1.6871404<br>48 | 0%<br>(0.36) |
| B7Z5H3_HUMAN      | B4DFR2_HUMAN | DYNLRB1 | B4DFR2 | Dynein light chain roadblock-type 1 (cDNA FLJ59194, moderately similar to Dynein light chain 2A, cytoplasmic)                                                                  | 13 kDa  | 0.16  | 4 | 3 | 1 | 0 | 0 | 2 | 1 | 0 | 1 | 0 | 0 | 0 | 0 | -<br>1.6871404<br>48 | 0%<br>(0.36) |
| SH3L1_HUMAN       | EDC3_HUMAN   | EDC3    | Q96F86 | Enhancer of mRNA-decapping protein 3 (LSM16 homolog) (YjeF N-terminal domain-containing protein 2) (YjeF_N2) (hYjeF_N2) (YjeF domain-containing protein 1)                     | 56 kDa  | 0.26  | 4 | 3 | 1 | 1 | 2 | 0 | 1 | 0 | 1 | 0 | 0 | 0 | 0 | -<br>1.6871404<br>48 | 0%<br>(0.36) |
| COQ6_HUMAN        | SYPM_HUMAN   | PARS2   | Q7L3T8 | Probable proline-tRNA ligase, mitochondrial (EC 6.1.1.15) (Proyl-tRNA synthetase) (ProRS)                                                                                      | 53 kDa  | 0.079 | 4 | 3 | 1 | 0 | 1 | 0 | 2 | 1 | 0 | 0 | 0 | 0 | 0 | -<br>1.6871404<br>48 | 0%<br>(0.36) |
| B7Z7F0_HUMAN      | GDPD1_HUMAN  | GDPD1   | Q8N9F7 | Glycerophosphodiester phosphodiesterase domain-containing protein 1 (EC 3.1.-.-) (Glycerophosphodiester phosphodiesterase 4)                                                   | 36 kDa  | 0.063 | 4 | 3 | 1 | 2 | 0 | 0 | 1 | 0 | 1 | 0 | 0 | 0 | 0 | -<br>1.6871404<br>48 | 0%<br>(0.36) |
| G5E9A6_HUMAN (+2) | PRRC1_HUMAN  | PRRC1   | Q96M27 | Protein PRRC1 (Proline-rich and coiled-coil-containing protein 1)                                                                                                              | 47 kDa  | 0.055 | 4 | 3 | 1 | 0 | 0 | 2 | 1 | 0 | 0 | 1 | 0 | 0 | 0 | -<br>1.6871404<br>48 | 0%<br>(0.36) |
| ARL3_HUMAN        | B4DDH9_HUMAN |         | B4DDH9 | cDNA FLJ53820, highly similar to U4/U6.U5 tri-snRNP-associated protein 1                                                                                                       | 73 kDa  | 0.2   | 4 | 3 | 1 | 0 | 0 | 1 | 2 | 0 | 0 | 1 | 0 | 0 | 0 | -<br>1.6871404<br>48 | 0%<br>(0.36) |

|                   |              |          |        |                                                                                                                                                                                                                                                                    |         |       |     |    |    |    |    |    |    |   |    |    |   |   |     |
|-------------------|--------------|----------|--------|--------------------------------------------------------------------------------------------------------------------------------------------------------------------------------------------------------------------------------------------------------------------|---------|-------|-----|----|----|----|----|----|----|---|----|----|---|---|-----|
| CDR2L_HUMAN       | C9JNZ0_HUMAN | SEC22A   | C9JNZ0 | Vesicle-trafficking protein SEC22a (Fragment)                                                                                                                                                                                                                      | 33 kDa  | 0.054 | 4   | 3  | 1  | 2  | 1  | 0  | 0  | 0 | 0  | 0  | 1 | - | 0%  |
| TBD2A_HUMAN       | ASK6D2_HUMAN |          | A8K6D2 | cDNA FLJ76620, highly similar to Homo sapiens C2f protein (C2F), mRNA                                                                                                                                                                                              | 27 kDa  | 0.029 | 4   | 3  | 1  | 0  | 0  | 0  | 3  | 0 | 1  | 0  | 0 | - | 0%  |
| SLMAP_HUMAN       | CRK_HUMAN    | CRK      | P46108 | Adapter molecule crk (Proto-oncogene c-Crk) (p38)                                                                                                                                                                                                                  | 34 kDa  | 0.053 | 4   | 3  | 1  | 0  | 0  | 0  | 3  | 0 | 1  | 0  | 0 | - | 0%  |
| AUHM_HUMAN        | PMVK_HUMAN   | PMVK     | Q15126 | Phosphomevalonate kinase (PMKase) (hPMK) (EC 2.7.4.2)                                                                                                                                                                                                              | 22 kDa  | 0.062 | 4   | 3  | 1  | 0  | 0  | 0  | 3  | 0 | 1  | 0  | 0 | - | 0%  |
| A8K9D2_HUMAN (+1) | SIAT1_HUMAN  | ST6GAL1  | P15907 | Beta-galactoside alpha-2,6-sialyltransferase 1 (Alpha 2,6-ST 1) (EC 2.4.99.1) (B-cell antigen CD75) (CMP-N-acetylneuraminic-beta-galactosamide-alpha-2,6-sialyltransferase 1) (ST6Gal I) (ST6GalI) (Sialyltransferase 1)                                           | 47 kDa  | 0.12  | 4   | 3  | 1  | 3  | 0  | 0  | 0  | 0 | 0  | 1  | 0 | - | 0%  |
| C9IZG4_HUMAN (+1) | I3L3B4_HUMAN |          | I3L3B4 | Uncharacterized protein (Fragment)                                                                                                                                                                                                                                 | 11 kDa  | 0.21  | 4   | 3  | 1  | 0  | 0  | 0  | 3  | 0 | 0  | 1  | 0 | - | 0%  |
| AP1S1_HUMAN (+1)  | A8K3E4_HUMAN |          | A8K3E4 | cDNA FLJ78367, highly similar to Homo sapiens fibrinogen, A alpha polypeptide (FGA), transcript variant alpha, mRNA                                                                                                                                                | 70 kDa  | 0.1   | 4   | 3  | 1  | 1  | 0  | 0  | 2  | 0 | 0  | 0  | 1 | - | 0%  |
| RT15_HUMAN        | MOQXN5_HUMAN | NUP62    | MOQXN5 | Nuclear pore glycoprotein p62                                                                                                                                                                                                                                      | 46 kDa  | 0.082 | 4   | 3  | 1  | 1  | 0  | 0  | 2  | 0 | 0  | 1  | 0 | - | 0%  |
| C9JAF7_HUMAN (+1) | THIO_HUMAN   | TXN      | P10599 | Thioredoxin (Trx) (ATL-derived factor) (ADF) (Surface-associated sulphhydryl protein) (SASP)                                                                                                                                                                       | 12 kDa  | 0.16  | 30  | 20 | 10 | 2  | 6  | 7  | 6  | 4 | 2  | 2  | 2 | - | 0%  |
| J3KN55_HUMAN (+1) | Q53GD1_HUMAN |          | Q53GD1 | Guanine nucleotide-binding protein subunit gamma (Fragment)                                                                                                                                                                                                        | 8 kDa   | 0.16  | 30  | 20 | 10 | 5  | 4  | 4  | 7  | 1 | 3  | 3  | 3 | - | 0%  |
| B4DPG9_HUMAN (+2) | PSME1_HUMAN  | PSME1    | Q06323 | Proteasome activator complex subunit 1 (11S regulator complex subunit alpha) (REG-alpha) (Activator of multicatalytic protease subunit 1) (Interferon gamma up-regulated I-5111 protein) (IGUP I-5111) (Proteasome activator 28 subunit alpha) (PA28a) (PA28alpha) | 29 kDa  | 0.06  | 35  | 24 | 12 | 0  | 5  | 8  | 11 | 3 | 3  | 4  | 2 | - | 0%  |
| PLCC_HUMAN        | F5H569_HUMAN | ATP6V0A1 | F5H569 | V-type proton ATPase 116 kDa subunit a isoform 1                                                                                                                                                                                                                   | 96 kDa  | 0.061 | 36  | 24 | 12 | 12 | 4  | 7  | 1  | 1 | 3  | 0  | 8 | - | 0%  |
| F210A_HUMAN (+1)  | A1L172_HUMAN | ACOT1    | A1L172 | Acyl-CoA thioesterase 1                                                                                                                                                                                                                                            | 46 kDa  | 0.1   | 36  | 24 | 12 | 3  | 13 | 6  | 2  | 1 | 1  | 6  | 4 | - | 0%  |
| ITB8_HUMAN (+1)   | B2R5U1_HUMAN |          | B2R5U1 | cDNA, FLJ92620, highly similar to Homo sapiens staphylococcal nuclease domain containing 1 (SND1), mRNA                                                                                                                                                            | 100 kDa | 0.073 | 103 | 68 | 35 | 7  | 23 | 20 | 18 | 0 | 14 | 18 | 4 | - | 95% |
| ABHD6_HUMAN       | D6RER5_HUMAN | 40787    | D6RER5 | Septin-11                                                                                                                                                                                                                                                          | 50 kDa  | 0.089 | 41  | 26 | 13 | 4  | 6  | 12 | 3  | 2 | 3  | 4  | 4 | - | 0%  |
| F5GYJ5_HUMAN (+1) | B3KWV6_HUMAN |          | B3KWV6 | cDNA FLJ43948 fis, clone TESTI4014924, highly similar to Homo sapiens cytoplasmic FMR1 interacting protein 1 (CYFIP1), transcript variant 1, mRNA                                                                                                                  | 146 kDa | 0.091 | 75  | 49 | 25 | 9  | 15 | 20 | 6  | 5 | 7  | 7  | 6 | - | 95% |
| B4DP38_HUMAN (+1) | B9EK46_HUMAN | CGN      | B9EK46 | Cingulin                                                                                                                                                                                                                                                           | 137 kDa | 0.079 | 6   | 5  | 2  | 2  | 1  | 0  | 2  | 2 | 0  | 0  | 0 | - | 0%  |
| Q86X36_HUMAN      | B3KN79_HUMAN |          | B3KN79 | cDNA FLJ13894 fis, clone THYRO1001671, highly similar to 59 kDa 2'-5'-oligoadenylate synthetase-like protein                                                                                                                                                       | 59 kDa  | 0.03  | 7   | 5  | 2  | 0  | 0  | 0  | 5  | 0 | 2  | 0  | 0 | - | 0%  |
| H7C525_HUMAN      | H0Y8R1_HUMAN | GRSF1    | H0Y8R1 | G-rich sequence factor 1 (Fragment)                                                                                                                                                                                                                                | 47 kDa  | 0.17  | 8   | 5  | 2  | 1  | 3  | 1  | 0  | 1 | 0  | 3  | 0 | - | 0%  |

|                   |              |         |        |                                                                                                                                                                                                         |         |       |     |     |    |    |    |    |    |    |    |    |    |   |             |                 |
|-------------------|--------------|---------|--------|---------------------------------------------------------------------------------------------------------------------------------------------------------------------------------------------------------|---------|-------|-----|-----|----|----|----|----|----|----|----|----|----|---|-------------|-----------------|
| B9A062_HUMAN (+1) | ACAP2_HUMAN  | ACAP2   | Q15057 | Arf-GAP with coiled-coil, ANK repeat and PH domain-containing protein 2 (Centaurin-beta-2) (Cnt-b2)                                                                                                     | 88 kDa  | 0.16  | 7   | 5   | 2  | 0  | 1  | 1  | 3  | 0  | 2  | 0  | 0  | - | 1.717696357 | 0% (0.28)       |
| F6IQP1_HUMAN (+1) | B5MDE0_HUMAN | RFT1    | B5MDE0 | Protein RFT1 homolog (RFT1 homolog (S. cerevisiae), isoform CRA_b)                                                                                                                                      | 56 kDa  | 0.32  | 7   | 5   | 2  | 1  | 0  | 1  | 3  | 0  | 1  | 0  | 1  | - | 1.717696357 | 0% (0.28)       |
| WDFY1_HUMAN       | B4DUC8_HUMAN | MTAP    | B4DUC8 | S-methyl-5'-thioadenosine phosphorylase (cDNA FLJ59758, highly similar to S-methyl-5'-thioadenosine phosphorylase (EC 2.4.2.28))                                                                        | 33 kDa  | 0.071 | 7   | 5   | 2  | 0  | 0  | 2  | 4  | 1  | 1  | 0  | 0  | - | 1.717696357 | 0% (0.28)       |
| BAX_HUMAN         | NCF2_HUMAN   | NCF2    | P19878 | Neutrophil cytosol factor 2 (NCF-2) (67 kDa neutrophil oxidase factor) (NADPH oxidase activator 2) (Neutrophil NADPH oxidase factor 2) (p67-phox)                                                       | 60 kDa  | 0.26  | 7   | 5   | 2  | 0  | 2  | 2  | 1  | 0  | 1  | 1  | 0  | - | 1.717696357 | 0% (0.28)       |
| B7Z322_HUMAN (+3) | GARI_HUMAN   | GAR1    | Q9NY12 | H/ACA ribonucleoprotein complex subunit 1 (Nucleolar protein family A member 1) (snRNP protein GAR1)                                                                                                    | 22 kDa  | 0.096 | 7   | 5   | 2  | 1  | 0  | 1  | 3  | 0  | 0  | 1  | 1  | - | 1.717696357 | 0% (0.28)       |
| J3KPT4_HUMAN (+2) | E9PE17_HUMAN | MRPS17  | E9PE17 | 28S ribosomal protein S17, mitochondrial (Fragment)                                                                                                                                                     | 14 kDa  | 0.066 | 7   | 5   | 2  | 1  | 1  | 1  | 2  | 2  | 0  | 0  | 0  | - | 1.717696357 | 0% (0.28)       |
| NUDC_HUMAN        | E9PGT3_HUMAN | RPS6KA1 | E9PGT3 | Ribosomal protein S6 kinase (EC 2.7.11.1)                                                                                                                                                               | 81 kDa  | 0.082 | 7   | 5   | 2  | 0  | 2  | 2  | 0  | 0  | 0  | 0  | 0  | - | 1.717696357 | 0% (0.28)       |
| CHERP_HUMAN (+1)  | C163A_HUMAN  | CD163   | Q86VB7 | Scavenger receptor cysteine-rich type I protein M130 (Hemoglobin scavenger receptor) (CD antigen CD163) [Cleaved into: Soluble CD163 (sCD163)]                                                          | 125 kDa | 0.032 | 48  | 32  | 16 | 6  | 12 | 6  | 8  | 0  | 3  | 9  | 5  | - | 1.721930055 | 95% (0.038)     |
| GATM_HUMAN        | NEUA_HUMAN   | CMAS    | Q8NFW8 | N-acetylneuraminyltransferase (EC 2.7.7.43) (CMP-N-acetylneuraminic acid synthase) (CMP-NeuNAc synthase)                                                                                                | 48 kDa  | 0.064 | 48  | 32  | 16 | 6  | 10 | 10 | 6  | 0  | 7  | 8  | 1  | - | 1.721930055 | 95% (0.038)     |
| M0QX35_HUMAN      | HBA_HUMAN    | HBA1;   | P69905 | Hemoglobin subunit alpha (Alpha-globin) (Hemoglobin alpha chain)                                                                                                                                        | 15 kDa  | 0.052 | 248 | 163 | 84 | 13 | 56 | 52 | 42 | 12 | 19 | 23 | 30 | - | 1.722386844 | 95% (< 0.00010) |
| B4DVY1_HUMAN      | FLNB_HUMAN   | FLNB    | O75369 | Filamin-B (FLN-B) (ABP-278) (ABP-280 homolog) (Actin-binding-like protein) (Beta-filamin) (Filamin homolog 1) (Fh1) (Filamin-3) (Thyroid autoantigen) (Truncated actin-binding protein) (Truncated ABP) | 278 kDa | 0.1   | 265 | 175 | 90 | 42 | 55 | 63 | 17 | 31 | 17 | 28 | 14 | - | 1.726813894 | 95% (< 0.00010) |
| B4DND4_HUMAN (+1) | I7B0X5_HUMAN | HLA-B   | I7B0X5 | MHC class I antigen (Fragment)                                                                                                                                                                          | 32 kDa  | 0.11  | 101 | 67  | 34 | 0  | 20 | 17 | 18 | 5  | 0  | 0  | 0  | - | 1.729973366 | 95% (0.0043)    |
| B3KS61_HUMAN (+1) | MYO1G_HUMAN  | MYO1G   | B011T2 | Unconventional myosin-Ig [Cleaved into: Minor histocompatibility antigen HA-2 (mHag HA-2)]                                                                                                              | 116 kDa | 0.23  | 10  | 7   | 3  | 0  | 3  | 3  | 1  | 0  | 0  | 2  | 1  | - | 1.733882526 | 0% (0.22)       |
| AK1BA_HUMAN       | E5RJR5_HUMAN | SKP1    | E5RJR5 | S-phase kinase-associated protein 1                                                                                                                                                                     | 19 kDa  | 0.18  | 10  | 7   | 3  | 1  | 2  | 1  | 3  | 2  | 0  | 2  | 0  | - | 1.733882526 | 0% (0.22)       |
| D3DQ48_HUMAN (+3) | B4DP77_HUMAN |         | B4DP77 | cDNA FLJ57413, highly similar to Mitochondrial 28S ribosomal protein S10                                                                                                                                | 19 kDa  | 0.083 | 11  | 7   | 3  | 3  | 1  | 0  | 3  | 2  | 1  | 0  | 1  | - | 1.733882526 | 0% (0.22)       |
| TPM1_HUMAN        | A8K2S7_HUMAN |         | A8K2S7 | cDNA FLJ77865                                                                                                                                                                                           | 39 kDa  | 0.17  | 10  | 7   | 3  | 7  | 0  | 0  | 0  | 1  | 0  | 2  | 0  | - | 1.733882526 | 0% (0.22)       |
| B4DEA3_HUMAN (+3) | UFSP2_HUMAN  | UFSP2   | Q9NUQ7 | Ufm1-specific protease 2 (USP2) (EC 3.4.22.-)                                                                                                                                                           | 53 kDa  | 0.06  | 10  | 7   | 3  | 6  | 0  | 0  | 1  | 0  | 0  | 0  | 3  | - | 1.733882526 | 0% (0.22)       |
| B2RCJ6_HUMAN (+1) | B7Z1C5_HUMAN |         | B7Z1C5 | cDNA FLJ51785, highly similar to Glutathione synthetase (EC 6.3.2.3)                                                                                                                                    | 45 kDa  | 0.02  | 10  | 7   | 3  | 0  | 2  | 4  | 1  | 1  | 1  | 1  | 0  | - | 1.733882526 | 0% (0.22)       |
| UB2L6_HUMAN       | B2R4V4_HUMAN |         | B2R4V4 | cDNA, FL192232, highly similar to Homo sapiens barrier to autointegration factor 1 (BANF1), mRNA                                                                                                        | 10 kDa  | 0.1   | 10  | 7   | 3  | 1  | 1  | 1  | 4  | 0  | 3  | 0  | 0  | - | 1.733882526 | 0% (0.22)       |

|                   |              |        |        |                                                                                                                                                                                                                                                                         |         |       |     |     |    |    |    |    |    |    |    |    |    |   |     |
|-------------------|--------------|--------|--------|-------------------------------------------------------------------------------------------------------------------------------------------------------------------------------------------------------------------------------------------------------------------------|---------|-------|-----|-----|----|----|----|----|----|----|----|----|----|---|-----|
| 41_HUMAN (+1)     | ACPH_HUMAN   | APEH   | P13798 | Acylamino-acid-releasing enzyme (AARE) (EC 3.4.19.1) (Acyl-peptide hydrolase) (APH) (Acylaminoacyl-peptidase) (Oxidized protein hydrolase) (OPH)                                                                                                                        | 81 kDa  | 0.053 | 10  | 7   | 3  | 0  | 2  | 3  | 2  | 2  | 0  | 1  | 0  | - | 0%  |
| H0Y3C5_HUMAN (+1) | RPR1A_HUMAN  | RPRD1A | Q96P16 | Regulation of nuclear pre-mRNA domain-containing protein 1A (Cyclin-dependent kinase inhibitor 2B-related protein) (p15INK4B-related protein)                                                                                                                           | 36 kDa  | 0.14  | 10  | 7   | 3  | 0  | 2  | 0  | 0  | 0  | 0  | 3  | 0  | - | 0%  |
| RAI14_HUMAN       | PLSL_HUMAN   | LCPI   | P13796 | Plastin-2 (L-plastin) (LC64P) (Lymphocyte cytosolic protein 1) (LCP-1)                                                                                                                                                                                                  | 70 kDa  | 0.023 | 168 | 112 | 57 | 12 | 46 | 46 | 7  | 1  | 7  | 27 | 21 | - | 95% |
| E9PIM6_HUMAN (+3) | RCC1_HUMAN   | RCC1   | P18754 | Regulator of chromosome condensation (Cell cycle regulatory protein) (Chromosome condensation protein 1)                                                                                                                                                                | 45 kDa  | 0.25  | 69  | 46  | 23 | 15 | 6  | 5  | 20 | 11 | 3  | 7  | 2  | - | 95% |
| B2R6G5_HUMAN (+1) | CYBP_HUMAN   | CACYBP | Q9HB71 | Calcyclin-binding protein (CacyBP) (CacyBP) (S100A6-binding protein) (Siab-interacting protein)                                                                                                                                                                         | 26 kDa  | 0.044 | 13  | 9   | 4  | 0  | 2  | 2  | 4  | 2  | 2  | 0  | 0  | - | 0%  |
| GNAI1_HUMAN       | Q5VWC4_HUMAN | PSMD4  | Q5VWC4 | 26S proteasome non-ATPase regulatory subunit 4 (Proteasome (Prosome, macropain) 26S subunit, non-ATPase, 4, isoform CRA_b)                                                                                                                                              | 41 kDa  | 0.3   | 13  | 9   | 4  | 0  | 3  | 3  | 3  | 1  | 1  | 2  | 0  | - | 0%  |
| E9PDY6_HUMAN (+1) | B3KPZ2_HUMAN |        | B3KPZ2 | cDNA FLJ32487 fis, clone SKNSH1000002, highly similar to Prostaglandin E synthase 2 (EC 5.3.99.3)                                                                                                                                                                       | 42 kDa  | 0.012 | 13  | 9   | 4  | 5  | 1  | 1  | 2  | 0  | 1  | 2  | 1  | - | 0%  |
| A8K3R2_HUMAN (+2) | PTN12_HUMAN  | PTPN12 | Q05209 | Tyrosine-protein phosphatase non-receptor type 12 (EC 3.1.3.48) (PTP-PEST) (Protein-tyrosine phosphatase G1) (PTPG1)                                                                                                                                                    | 88 kDa  | 0.054 | 13  | 9   | 4  | 1  | 5  | 3  | 0  | 0  | 2  | 1  | 1  | - | 0%  |
| J3KNH7_HUMAN (+1) | PSB8_HUMAN   | PSMB8  | P28062 | Proteasome subunit beta type-8 (EC 3.4.25.1) (Low molecular mass protein 7) (Macropain subunit C13) (Multicatalytic endopeptidase complex subunit C13) (Proteasome component C13) (Proteasome subunit beta-5i) (Really interesting new gene 10 protein)                 | 30 kDa  | 0.049 | 12  | 9   | 4  | 0  | 4  | 1  | 4  | 0  | 0  | 3  | 1  | - | 0%  |
| AFAP1_HUMAN       | LEG1_HUMAN   | LGALS1 | P09382 | Galectin-1 (Gal-1) (14 kDa laminin-binding protein) (HLBP14) (14 kDa lectin) (Beta-galactoside-binding lectin L-14-I) (Galaptin) (HBL) (HPL) (Lactose-binding lectin 1) (Lectin galactoside-binding soluble 1) (Putative MAPK-activating protein PM12) (S-Lac lectin 1) | 15 kDa  | 0.034 | 75  | 50  | 25 | 7  | 15 | 22 | 6  | 2  | 9  | 7  | 7  | - | 95% |
| B4DYN8_HUMAN (+1) | B4DIT7_HUMAN | TGM2   | B4DIT7 | Protein-glutamine gamma-glutamyltransferase 2 (cDNA FLJ58187, highly similar to Protein-glutamine gamma-glutamyltransferase 2) (EC 2.3.2.13)                                                                                                                            | 69 kDa  | 0.13  | 209 | 140 | 71 | 38 | 41 | 37 | 24 | 8  | 18 | 16 | 30 | - | 95% |
| F8WAB8_HUMAN      | A6NG51_HUMAN | SPTAN1 | A6NG51 | Spectrin alpha chain, non-erythrocytic 1                                                                                                                                                                                                                                | 285 kDa | 0.11  | 227 | 150 | 76 | 49 | 36 | 36 | 29 | 18 | 6  | 32 | 20 | - | 95% |
| B2R7N6_HUMAN (+2) | GRB2_HUMAN   | GRB2   | P62993 | Growth factor receptor-bound protein 2 (Adapter protein GRB2) (Protein Ash) (SH2/SH3 adapter GRB2)                                                                                                                                                                      | 25 kDa  | 0.053 | 16  | 11  | 5  | 0  | 3  | 3  | 4  | 0  | 2  | 1  | 2  | - | 0%  |
| NADC_HUMAN        | KDEL2_HUMAN  | KDEL2  | Q7Z4H8 | KDEL motif-containing protein 2                                                                                                                                                                                                                                         | 59 kDa  | 0.088 | 16  | 11  | 5  | 2  | 5  | 2  | 3  | 0  | 0  | 3  | 2  | - | 0%  |
| B4E381_HUMAN (+3) | SIAS_HUMAN   | NANS   | Q9NR45 | Sialic acid synthase (N-acetylneuraminase synthase) (EC 2.5.1.56) (N-acetylneuraminase-9-phosphate synthase) (EC 2.5.1.57) (N-acetylneuraminic acid                                                                                                                     | 40 kDa  | 0.047 | 16  | 11  | 5  | 0  | 6  | 2  | 3  | 2  | 3  | 0  | 0  | - | 0%  |



|                   |              |         |        |                                                                                                                                                                                                                                                                                              |         |       |    |    |    |    |    |    |    |   |   |   |    |   |             |             |
|-------------------|--------------|---------|--------|----------------------------------------------------------------------------------------------------------------------------------------------------------------------------------------------------------------------------------------------------------------------------------------------|---------|-------|----|----|----|----|----|----|----|---|---|---|----|---|-------------|-------------|
|                   |              |         |        | phosphate synthase (N-acetylneuraminic acid synthase)                                                                                                                                                                                                                                        |         |       |    |    |    |    |    |    |    |   |   |   |    |   |             |             |
| A6NJZ9_HUMAN (+2) | DBLOH_HUMAN  | DIABLO  | Q9NR28 | Diablo homolog, mitochondrial (Direct IAP-binding protein with low pI) (Second mitochondria-derived activator of caspase) (Smac)                                                                                                                                                             | 27 kDa  | 0.056 | 16 | 11 | 5  | 2  | 5  | 2  | 2  | 2 | 0 | 1 | 2  | - | 1.750735545 | 0% (0.15)   |
| D6W4Z6_HUMAN (+1) | SYLM_HUMAN   | LARS2   | Q15031 | Probable leucine-tRNA ligase, mitochondrial (EC 6.1.1.4) (Leucyl-tRNA synthetase) (LeuRS)                                                                                                                                                                                                    | 102 kDa | 0.098 | 19 | 13 | 6  | 5  | 2  | 4  | 2  | 4 | 0 | 0 | 2  | - | 1.755683587 | 0% (0.13)   |
| DCD_HUMAN         | B2R5N4_HUMAN |         | B2R5N4 | cDNA, FLJ92544, highly similar to Homo sapiens lectin, mannose-binding 2-like (LMAN2L), mRNA                                                                                                                                                                                                 | 40 kDa  | 0.33  | 19 | 13 | 6  | 4  | 4  | 1  | 4  | 0 | 2 | 0 | 4  | - | 1.755683587 | 0% (0.13)   |
| KAD1_HUMAN (+2)   | APIM2_HUMAN  | APIM2   | Q9Y6Q5 | AP-1 complex subunit mu-2 (AP-mu chain family member mu1B) (Adaptor protein complex AP-1 subunit mu-2) (Adaptor-related protein complex 1 subunit mu-2) (Clathrin assembly protein complex 1 mu-2 medium chain 2) (Golgi adaptor HA1/API adaptin mu-2 subunit) (Mu-adaptin 2) (Mu1B-adaptin) | 48 kDa  | 0.2   | 19 | 13 | 6  | 8  | 1  | 2  | 2  | 2 | 1 | 1 | 2  | - | 1.755683587 | 0% (0.13)   |
| B4DPS5_HUMAN (+3) | Q53HP9_HUMAN |         | Q53HP9 | Chromosome 14 open reading frame 159 variant (Fragment)                                                                                                                                                                                                                                      | 44 kDa  | 0.11  | 19 | 13 | 6  | 6  | 1  | 1  | 5  | 3 | 0 | 3 | 0  | - | 1.755683587 | 0% (0.13)   |
| F5GYG5_HUMAN (+1) | CBPD_HUMAN   | CPD     | O75976 | Carboxypeptidase D (EC 3.4.17.22) (Metalloproteinase D) (gp180)                                                                                                                                                                                                                              | 153 kDa | 0.18  | 22 | 15 | 7  | 10 | 3  | 2  | 0  | 1 | 0 | 2 | 4  | - | 1.759437005 | 0% (0.11)   |
| LONP2_HUMAN       | B5BU72_HUMAN | PICALM  | B5BU72 | Phosphatidylinositol-binding clathrin assembly protein isoform 2                                                                                                                                                                                                                             | 66 kDa  | 0.04  | 22 | 15 | 7  | 0  | 6  | 9  | 1  | 2 | 0 | 3 | 2  | - | 1.759437005 | 0% (0.11)   |
| RAB12_HUMAN       | U2AF1_HUMAN  | U2AF1   | Q01081 | Splicing factor U2AF 35 kDa subunit (U2 auxiliary factor 35 kDa subunit) (U2 small nuclear RNA auxiliary factor 1) (U2 snRNP auxiliary factor small subunit)                                                                                                                                 | 28 kDa  | 0.13  | 21 | 15 | 7  | 1  | 3  | 4  | 7  | 2 | 1 | 2 | 2  | - | 1.759437005 | 0% (0.11)   |
| B2RAH7_HUMAN (+2) | B7Z4K8_HUMAN |         | B7Z4K8 | cDNA FLJ52869, highly similar to Homo sapiens basic leucine zipper and W2 domains 2 (BZW2), mRNA                                                                                                                                                                                             | 45 kDa  | 0.07  | 22 | 15 | 7  | 0  | 5  | 6  | 4  | 0 | 0 | 4 | 1  | - | 1.759437005 | 0% (0.11)   |
| RIC8A_HUMAN       | B0YJ32_HUMAN | LAMA3   | B0YJ32 | Laminin alpha-3 chain variant 1                                                                                                                                                                                                                                                              | 367 kDa | 0.072 | 28 | 19 | 9  | 9  | 5  | 5  | 0  | 4 | 0 | 0 | 5  | - | 1.764758554 | 0% (0.081)  |
| NOG2_HUMAN        | THEM6_HUMAN  | THEM6   | Q8WUY1 | Protein THEM6 (Mesenchymal stem cell protein DSCD75) (Thioesterase superfamily member 6)                                                                                                                                                                                                     | 24 kDa  | 0.049 | 28 | 19 | 9  | 3  | 4  | 3  | 9  | 3 | 1 | 4 | 2  | - | 1.764758554 | 0% (0.081)  |
| Q12915_HUMAN      | CTL1_HUMAN   | SLC44A1 | Q8WW15 | Choline transporter-like protein 1 (CDw92) (Solute carrier family 44 member 1) (CD antigen CD92)                                                                                                                                                                                             | 73 kDa  | 0.13  | 28 | 19 | 9  | 3  | 8  | 7  | 1  | 2 | 1 | 4 | 2  | - | 1.764758554 | 0% (0.081)  |
| SLTM_HUMAN        | EFHD2_HUMAN  | EFHD2   | Q96C19 | EF-hand domain-containing protein D2 (Swiprosin-1)                                                                                                                                                                                                                                           | 27 kDa  | 0.019 | 31 | 21 | 10 | 1  | 6  | 11 | 4  | 0 | 4 | 3 | 3  | - | 1.76671518  | 0% (0.069)  |
| NASP_HUMAN (+1)   | B7Z7G9_HUMAN |         | B7Z7G9 | cDNA FLJ56170, highly similar to Glucosylceramidase (EC 3.2.1.45)                                                                                                                                                                                                                            | 55 kDa  | 0.057 | 33 | 23 | 11 | 11 | 7  | 5  | 0  | 3 | 0 | 4 | 4  | - | 1.768355659 | 0% (0.060)  |
| RL7L_HUMAN        | A8KA84_HUMAN |         | A8KA84 | cDNA FLJ78682, highly similar to Homo sapiens 2'-5'-oligoadenylate synthetase 3, 100kDa (OAS3), mRNA                                                                                                                                                                                         | 121 kDa | 0.16  | 38 | 25 | 12 | 0  | 1  | 3  | 21 | 1 | 6 | 5 | 0  | - | 1.769751571 | 0% (0.051)  |
| NOC4L_HUMAN       | QOR_HUMAN    | CRYZ    | Q08257 | Quinone oxidoreductase (EC 1.6.5.5) (NADPH:quinone reductase) (Zeta-crystallin)                                                                                                                                                                                                              | 35 kDa  | 0.045 | 37 | 25 | 12 | 10 | 3  | 2  | 10 | 4 | 2 | 1 | 5  | - | 1.769751571 | 0% (0.051)  |
| GLRX3_HUMAN       | Q6DEN2_HUMAN | DPYSL3  | Q6DEN2 | DPYSL3 protein                                                                                                                                                                                                                                                                               | 74 kDa  | 0.081 | 40 | 27 | 13 | 0  | 12 | 6  | 9  | 0 | 6 | 0 | 7  | - | 1.770954405 | 95% (0.044) |
| RASM_HUMAN        | B4E2A6_HUMAN |         | B4E2A6 | cDNA FLJ55508, highly similar to Sad1/unc-84-like protein 2                                                                                                                                                                                                                                  | 84 kDa  | 0.13  | 52 | 35 | 17 | 22 | 4  | 4  | 5  | 2 | 1 | 4 | 10 | - | 1.774469733 | 95% (0.025) |

|                   |              |        |        |                                                                                                                                                                                                                                                                                                                         |         |       |     |     |     |     |     |     |    |    |    |    |    |   |             |                 |
|-------------------|--------------|--------|--------|-------------------------------------------------------------------------------------------------------------------------------------------------------------------------------------------------------------------------------------------------------------------------------------------------------------------------|---------|-------|-----|-----|-----|-----|-----|-----|----|----|----|----|----|---|-------------|-----------------|
| ITCH_HUMAN        | AHNC_HUMAN   | AHNAK  | Q09666 | Neuroblast differentiation-associated protein AHNAK (Desmoyokin)                                                                                                                                                                                                                                                        | 629 kDa | 0.05  | 663 | 442 | 222 | 173 | 122 | 101 | 51 | 88 | 14 | 58 | 63 | - | 1.777770945 | 95% (< 0.00010) |
| STRP1_HUMAN       | G5E972_HUMAN | TMPO   | G5E972 | Thymopentin (Thymopoietin, isoform CRA_d)                                                                                                                                                                                                                                                                               | 46 kDa  | 0.024 | 88  | 59  | 29  | 12  | 15  | 20  | 12 | 11 | 2  | 6  | 10 | - | 1.779566127 | 95% (0.0050)    |
| B3KTA3_HUMAN (+3) | H2AZ_HUMAN   | H2AFZ  | POC055 | Histone H2A.Z (H2A/z)                                                                                                                                                                                                                                                                                                   | 14 kDa  | 0.055 | 255 | 169 | 84  | 34  | 35  | 38  | 63 | 31 | 16 | 10 | 28 | - | 1.785443008 | 95% (< 0.00010) |
| RTN2_HUMAN        | MAOM_HUMAN   | ME2    | P23368 | NAD-dependent malic enzyme, mitochondrial (NAD-ME) (EC 1.1.1.38) (Malic enzyme 2)                                                                                                                                                                                                                                       | 65 kDa  | 0.048 | 224 | 151 | 74  | 19  | 55  | 54  | 23 | 14 | 21 | 11 | 28 | - | 1.808697574 | 95% (< 0.00010) |
| Q53G41_HUMAN      | B3KXC3_HUMAN |        | B3KXC3 | Ferritin                                                                                                                                                                                                                                                                                                                | 21 kDa  | 0.061 | 55  | 38  | 18  | 4   | 15  | 17  | 3  | 3  | 2  | 6  | 8  | - | 1.821557478 | 95% (0.017)     |
| B2RC75_HUMAN      | H10_HUMAN    | H1F0   | P07305 | Histone H1.0 (Histone H1') (Histone H1(0)) (Cleared into: Histone H1.0, N-terminally processed)                                                                                                                                                                                                                         | 21 kDa  | 0.075 | 41  | 28  | 13  | 4   | 6   | 8   | 10 | 2  | 4  | 2  | 5  | - | 1.833666623 | 95% (0.034)     |
| NUP50_HUMAN       | TPBG_HUMAN   | TPBG   | Q13641 | Trophoblast glycoprotein (5T4 oncofetal antigen) (5T4 oncofetal trophoblast glycoprotein) (5T4 oncotrophoblast glycoprotein) (M6p1)                                                                                                                                                                                     | 46 kDa  | 0.09  | 41  | 28  | 13  | 5   | 12  | 11  | 0  | 1  | 2  | 2  | 8  | - | 1.833666623 | 95% (0.034)     |
| PKD2_HUMAN        | R4RWU8_HUMAN | HLA-C  | R4RWU8 | MHC class I antigen (Fragment)                                                                                                                                                                                                                                                                                          | 32 kDa  | 0.024 | 99  | 67  | 32  | 11  | 17  | 13  | 25 | 0  | 0  | 10 | 12 | - | 1.834084704 | 95% (0.0020)    |
| CUL2_HUMAN (+1)   | SPTB2_HUMAN  | SPTBN1 | Q01082 | Spectrin beta chain, non-erythrocytic 1 (Beta-II spectrin) (Fodrin beta chain) (Spectrin, non-erythroid beta chain 1)                                                                                                                                                                                                   | 275 kDa | 0.017 | 146 | 100 | 48  | 28  | 25  | 35  | 12 | 19 | 2  | 16 | 11 | - | 1.837306018 | 95% (0.00021)   |
| F134A_HUMAN       | LAMB3_HUMAN  | LAMB3  | Q13751 | Laminin subunit beta-3 (Epligrin subunit beta) (Kalinin B1 chain) (Kalinin subunit beta) (Laminin B1k chain) (Laminin-5 subunit beta) (Nicein subunit beta)                                                                                                                                                             | 130 kDa | 0.063 | 35  | 24  | 11  | 9   | 9   | 6   | 0  | 0  | 0  | 0  | 11 | - | 1.841301206 | 95% (0.045)     |
| B2R7C2_HUMAN (+1) | A7BI36_HUMAN | RRBP1  | A7BI36 | p180/ribosome receptor                                                                                                                                                                                                                                                                                                  | 166 kDa | 0.028 | 80  | 55  | 26  | 9   | 25  | 17  | 5  | 4  | 0  | 18 | 5  | - | 1.844314123 | 95% (0.0044)    |
| CSDE1_HUMAN (+3)  | B3KTJ9_HUMAN |        | B3KTJ9 | cDNA FLJ38393 fis, clone FEBRA2007212                                                                                                                                                                                                                                                                                   | 103 kDa | 0.049 | 32  | 22  | 10  | 6   | 7   | 5   | 4  | 1  | 2  | 3  | 4  | - | 1.846141835 | 0% (0.052)      |
| FARP1_HUMAN       | B3KUF6_HUMAN |        | B3KUF6 | cDNA FLJ39748 fis, clone SMINT2017436, highly similar to Homo sapiens haloacid dehalogenase-like hydrolase domain containing 3 (HDHD3), mRNA                                                                                                                                                                            | 28 kDa  | 0.028 | 33  | 22  | 10  | 5   | 5   | 4   | 8  | 2  | 4  | 2  | 2  | - | 1.846141835 | 0% (0.052)      |
| Q9TP39_HUMAN      | ARL1_HUMAN   | ARL1   | P40616 | ADP-ribosylation factor-like protein 1                                                                                                                                                                                                                                                                                  | 20 kDa  | 0.54  | 29  | 20  | 9   | 7   | 4   | 4   | 5  | 1  | 4  | 3  | 1  | - | 1.851930923 | 0% (0.060)      |
| CORO7_HUMAN       | CISD1_HUMAN  | CISD1  | Q9NZ45 | CDGSH iron-sulfur domain-containing protein 1 (MitoNEET)                                                                                                                                                                                                                                                                | 12 kDa  | 0.039 | 29  | 20  | 9   | 7   | 4   | 2   | 7  | 1  | 3  | 5  | 0  | - | 1.851930923 | 0% (0.060)      |
| C9JZG9_HUMAN (+3) | RL23A_HUMAN  | RPL23A | P62750 | 60S ribosomal protein L23a                                                                                                                                                                                                                                                                                              | 18 kDa  | 0.29  | 26  | 18  | 8   | 3   | 3   | 4   | 8  | 2  | 3  | 1  | 2  | - | 1.858976079 | 0% (0.070)      |
| M0QY22_HUMAN      | VASP_HUMAN   | VASP   | P50552 | Vasodilator-stimulated phosphoprotein (VASP)                                                                                                                                                                                                                                                                            | 40 kDa  | 0.2   | 25  | 18  | 8   | 1   | 5   | 10  | 2  | 1  | 3  | 2  | 2  | - | 1.858976079 | 0% (0.070)      |
| B4DU97_HUMAN      | RAB9A_HUMAN  | RAB9A  | P51151 | Ras-related protein Rab-9A                                                                                                                                                                                                                                                                                              | 23 kDa  | 0.18  | 26  | 18  | 8   | 5   | 5   | 3   | 5  | 1  | 0  | 3  | 4  | - | 1.858976079 | 0% (0.070)      |
| B2RNR6_HUMAN (+1) | AP1M1_HUMAN  | AP1M1  | Q9BXSS | AP-1 complex subunit mu-1 (AP-mu chain family member mu1A) (Adapter-related protein complex 1 subunit mu-1) (Adaptor protein complex AP-1 subunit mu-1) (Clathrin assembly protein complex 1 mu-1 medium chain 1) (Clathrin coat assembly protein AP47) (Clathrin coat-associated protein AP47) (Golgi adaptor HA1/AP1) | 49 kDa  | 0.036 | 26  | 18  | 8   | 3   | 6   | 6   | 3  | 2  | 1  | 3  | 2  | - | 1.858976079 | 0% (0.070)      |



|                   |              |                |        |                                                                                                                                                                                                                 |         |       |     |    |    |    |    |    |    |    |   |    |    |   |             |               |
|-------------------|--------------|----------------|--------|-----------------------------------------------------------------------------------------------------------------------------------------------------------------------------------------------------------------|---------|-------|-----|----|----|----|----|----|----|----|---|----|----|---|-------------|---------------|
|                   |              |                |        | inhibitor) (Protein kinase inhibitor of 58 kDa) (Protein kinase inhibitor p58)                                                                                                                                  |         |       |     |    |    |    |    |    |    |    |   |    |    |   |             |               |
| F8W9Y0_HUMAN (+2) | Q6GMX0_HUMAN |                | Q6GMX0 | Uncharacterized protein                                                                                                                                                                                         | 26 kDa  | 0.11  | 61  | 42 | 19 | 2  | 16 | 13 | 12 | 5  | 0 | 6  | 8  | - | 1.908143878 | 95% (0.0084)  |
| B3KR61_HUMAN (+1) | BIG2_HUMAN   | ARFGF2         | Q9Y6D5 | Brefeldin A-inhibited guanine nucleotide-exchange protein 2 (Brefeldin A-inhibited GEP 2) (ADP-ribosylation factor guanine nucleotide-exchange factor 2)                                                        | 202 kDa | 0.12  | 14  | 10 | 4  | 2  | 5  | 1  | 2  | 1  | 2 | 1  | 0  | - | 1.914072413 | 0% (0.13)     |
| EMD_HUMAN         | THMS2_HUMAN  | THEMIS2        | Q5TEJ8 | Protein THEMIS2 (Induced by contact to basement membrane 1 protein) (Protein ICB-1) (Thymocyte-expressed molecule involved in selection protein 2)                                                              | 72 kDa  | 0.11  | 14  | 10 | 4  | 2  | 3  | 3  | 2  | 0  | 1 | 3  | 0  | - | 1.914072413 | 0% (0.13)     |
| CX6B1_HUMAN       | TOR4A_HUMAN  | TOR4A          | Q9NXH8 | Torsin-4A (Torsin family 4 member A)                                                                                                                                                                            | 47 kDa  | 0.27  | 14  | 10 | 4  | 7  | 2  | 1  | 0  | 0  | 0 | 0  | 4  | - | 1.914072413 | 0% (0.13)     |
| TOR2A_HUMAN       | FRIL_HUMAN   | FTL            | P02792 | Ferritin light chain (Ferritin L subunit)                                                                                                                                                                       | 20 kDa  | 0.12  | 118 | 83 | 38 | 8  | 29 | 32 | 15 | 2  | 7 | 12 | 16 | - | 1.918185005 | 95% (0.00033) |
| TIM22_HUMAN       | PLXB2_HUMAN  | PLXNB2         | O15031 | Plexin-B2 (MM1)                                                                                                                                                                                                 | 205 kDa | 0.16  | 55  | 38 | 17 | 21 | 7  | 6  | 4  | 6  | 1 | 9  | 2  | - | 1.921396491 | 95% (0.011)   |
| DGLB_HUMAN (+1)   | RENT1_HUMAN  | UPF1           | Q92900 | Regulator of nonsense transcripts 1 (EC 3.6.4.-) (ATP-dependent helicase RENT1) (Nonsense mRNA reducing factor 1) (NORF1) (Up-frameshift suppressor 1 homolog) (hUpf1)                                          | 124 kDa | 0.046 | 74  | 51 | 23 | 5  | 16 | 18 | 12 | 11 | 8 | 4  | 0  | - | 1.925084678 | 95% (0.0038)  |
| PPCS_HUMAN        | Q53GX6_HUMAN |                | Q53GX6 | Nucleobindin 1 variant (Fragment)                                                                                                                                                                               | 54 kDa  | 0.051 | 52  | 36 | 16 | 12 | 8  | 12 | 4  | 2  | 0 | 5  | 9  | - | 1.929178719 | 95% (0.012)   |
| SFXN2_HUMAN       | Q6N097_HUMAN | DKFZp686H20196 | Q6N097 | Putative uncharacterized protein DKFZp686H20196                                                                                                                                                                 | 53 kDa  | 0.13  | 49  | 34 | 15 | 2  | 13 | 11 | 8  | 1  | 2 | 5  | 8  | - | 1.93792125  | 95% (0.014)   |
| A2ACR1_HUMAN (+2) | SYNE2_HUMAN  | SYNE2          | Q8WXH0 | Nesprin-2 (Nuclear envelope spectrin repeat protein 2) (Nucleus and actin connecting element protein) (Protein NUANCE) (Synaptic nuclear envelope protein 2) (Syne-2)                                           | 796 kDa | 0.14  | 30  | 21 | 9  | 17 | 3  | 1  | 0  | 2  | 0 | 7  | 0  | - | 1.939105534 | 95% (0.044)   |
| CLYBL_HUMAN       | F8W7U8_HUMAN | MRE11A         | F8W7U8 | Double-strand break repair protein MRE11A                                                                                                                                                                       | 81 kDa  | 0.074 | 11  | 8  | 3  | 1  | 2  | 2  | 3  | 1  | 0 | 2  | 0  | - | 1.944075084 | 0% (0.16)     |
| ASGL1_HUMAN       | D3DWV9_HUMAN | hCG_2004980    | D3DWV9 | HCG2004980, isoform CRA_g                                                                                                                                                                                       | 37 kDa  | 0.14  | 11  | 8  | 3  | 5  | 0  | 0  | 4  | 1  | 0 | 0  | 2  | - | 1.944075084 | 0% (0.16)     |
| B7Z3U1_HUMAN (+2) | CAB39_HUMAN  | CAB39          | Q9Y376 | Calcium-binding protein 39 (MO25alpha) (Protein Mo25)                                                                                                                                                           | 40 kDa  | 0.063 | 11  | 8  | 3  | 2  | 2  | 2  | 3  | 1  | 1 | 1  | 0  | - | 1.944075084 | 0% (0.16)     |
| NDUBB_HUMAN (+1)  | B1AHD1_HUMAN | NHP2L1         | B1AHD1 | NHP2-like protein 1                                                                                                                                                                                             | 15 kDa  | 0.18  | 11  | 8  | 3  | 0  | 1  | 1  | 6  | 0  | 1 | 1  | 1  | - | 1.944075084 | 0% (0.16)     |
| STX6_HUMAN        | DDX58_HUMAN  | DDX58          | Q95786 | Probable ATP-dependent RNA helicase DDX58 (EC 3.6.4.13) (DEAD box protein 58) (RIG-I-like receptor 1) (RLR-1) (Retinoic acid-inducible gene 1 protein) (RIG-1) (Retinoic acid-inducible gene 1 protein) (RIG-1) | 107 kDa | 0.047 | 11  | 8  | 3  | 0  | 0  | 0  | 8  | 1  | 1 | 1  | 0  | - | 1.944075084 | 0% (0.16)     |
| PI42C_HUMAN       | THOC4_HUMAN  | ALYREF         | Q86V81 | THO complex subunit 4 (Tho4) (Ally of AML-1 and LEF-1) (Aly/REF export factor) (Transcriptional coactivator Aly/REF) (bZIP-enhancing factor BEF)                                                                | 27 kDa  | 0.074 | 11  | 8  | 3  | 0  | 3  | 2  | 3  | 0  | 0 | 1  | 2  | - | 1.944075084 | 0% (0.16)     |
| F61QY8_HUMAN      | Q53G62_HUMAN |                | Q53G62 | Mitochondrial ribosomal protein S28 variant (Fragment)                                                                                                                                                          | 21 kDa  | 0.28  | 11  | 8  | 3  | 4  | 1  | 1  | 2  | 1  | 0 | 0  | 2  | - | 1.944075084 | 0% (0.16)     |
| A8KAJ7_HUMAN (+2) | CAH1_HUMAN   | CA1            | P00915 | Carbonic anhydrase 1 (EC 4.2.1.1) (Carbonate dehydratase I) (Carbonic                                                                                                                                           | 29 kDa  | 0.055 | 11  | 8  | 3  | 0  | 2  | 2  | 4  | 0  | 0 | 0  | 3  | - | 1.944075084 | 0% (0.16)     |

|                   |              |        |        |                                                                                                                                                                                                                              |         |       |     |     |     |    |    |    |    |   |   |    |   |   |   |             |                |
|-------------------|--------------|--------|--------|------------------------------------------------------------------------------------------------------------------------------------------------------------------------------------------------------------------------------|---------|-------|-----|-----|-----|----|----|----|----|---|---|----|---|---|---|-------------|----------------|
|                   |              |        |        | anhydrase B) (CAB) (Carbonic anhydrase I) (CA-I)                                                                                                                                                                             |         |       |     |     |     |    |    |    |    |   |   |    |   |   |   |             |                |
| B4DEX8_HUMAN (+1) | RHOG_HUMAN   | RHOG   | P84095 | Rho-related GTP-binding protein RhoG                                                                                                                                                                                         | 21 kDa  | 0.12  | 11  | 8   | 3   | 1  | 1  | 1  | 5  | 0 | 1 | 1  | 1 | 1 | 1 | 1.944075084 | 0% (0.16)      |
| DNJC9_HUMAN       | TOR2A_HUMAN  | TOR2A  | Q5JU69 | Torsin-2A (Torsin family 2 member A) (Torsin-related protein 1)                                                                                                                                                              | 36 kDa  | 0.11  | 11  | 8   | 3   | 0  | 2  | 1  | 3  | 0 | 1 | 2  | 0 | 0 | 0 | 1.944075084 | 0% (0.16)      |
| ADNP_HUMAN (+2)   | Q53EW8_HUMAN |        | Q53EW8 | Thiosulfate sulfurtransferase variant (Fragment)                                                                                                                                                                             | 33 kDa  | 0.026 | 43  | 30  | 13  | 12 | 8  | 6  | 4  | 7 | 3 | 0  | 3 | 0 | 0 | 1.959095896 | 95% (0.019)    |
| B4DDT6_HUMAN (+2) | LEMD2_HUMAN  | LEMD2  | Q8NC56 | LEM domain-containing protein 2 (hLEM2)                                                                                                                                                                                      | 57 kDa  | 0.15  | 60  | 41  | 18  | 11 | 6  | 5  | 19 | 4 | 6 | 3  | 5 | 5 | 5 | 1.960860416 | 95% (0.0072)   |
| AURKB_HUMAN (+4)  | B7XGC2_HUMAN | HLA-A  | B7XGC2 | MHC class I antigen (Fragment)                                                                                                                                                                                               | 32 kDa  | 0.078 | 75  | 52  | 23  | 5  | 11 | 13 | 23 | 3 | 5 | 8  | 7 | 7 | 7 | 1.961953627 | 95% (0.0028)   |
| CP4X1_HUMAN       | HBD_HUMAN    | HBD    | P02042 | Hemoglobin subunit delta (Delta-globin) (Hemoglobin delta chain)                                                                                                                                                             | 16 kDa  | 0.047 | 343 | 235 | 106 | 0  | 76 | 82 | 67 | 0 | 0 | 26 | 0 | 0 | 0 | 1.970422561 | 95% (<0.00010) |
| A8K4P8_HUMAN (+1) | B2R6F5_HUMAN |        | B2R6F5 | cDNA, FLJ92928, highly similar to Homo sapiens retinitis pigmentosa 2 (X-linked recessive) (RP2), mRNA                                                                                                                       | 40 kDa  | 0.016 | 24  | 17  | 7   | 7  | 4  | 5  | 1  | 0 | 1 | 2  | 4 | 4 | 4 | 1.976033884 | 0% (0.059)     |
| NEK9_HUMAN        | A8K878_HUMAN |        | A8K878 | cDNA FLJ77177, highly similar to Homo sapiens arginine-rich, mutated in early stage tumors (ARMET), mRNA                                                                                                                     | 21 kDa  | 0.027 | 24  | 17  | 7   | 4  | 4  | 7  | 2  | 0 | 5 | 0  | 2 | 2 | 2 | 1.976033884 | 0% (0.059)     |
| RADI_HUMAN        | NLRX1_HUMAN  | NLRX1  | Q86UT6 | NLR family member X1 (Caterpillar protein 11.3) (CLR11.3) (Nucleotide-binding oligomerization domain protein 26) (Nucleotide-binding oligomerization domain protein 5) (Nucleotide-binding oligomerization domain protein 9) | 108 kDa | 0.15  | 8   | 6   | 2   | 2  | 2  | 1  | 1  | 1 | 1 | 0  | 0 | 0 | 0 | 1.992553376 | 0% (0.19)      |
| C9JSS0_HUMAN (+1) | J3QT16_HUMAN | PTK2   | J3QT16 | Focal adhesion kinase 1                                                                                                                                                                                                      | 121 kDa | 0.11  | 8   | 6   | 2   | 0  | 2  | 4  | 0  | 1 | 0 | 1  | 0 | 0 | 0 | 1.992553376 | 0% (0.19)      |
| B0QZ43_HUMAN (+3) | B4DDF4_HUMAN | CNN2   | B4DDF4 | Calponin-2 (cDNA FLJ52469, highly similar to Calponin-2)                                                                                                                                                                     | 33 kDa  | 0.2   | 8   | 6   | 2   | 2  | 2  | 2  | 0  | 0 | 0 | 0  | 2 | 2 | 2 | 1.992553376 | 0% (0.19)      |
| RGPA2_HUMAN       | ADRO_HUMAN   | FDXR   | P22570 | NADPH:adrenodoxin oxidoreductase, mitochondrial (AR) (Adrenodoxin reductase) (EC 1.18.1.6) (Ferredoxin--NADP(+) reductase) (Ferredoxin reductase)                                                                            | 54 kDa  | 0.012 | 8   | 6   | 2   | 2  | 0  | 0  | 4  | 0 | 2 | 0  | 0 | 0 | 0 | 1.992553376 | 0% (0.19)      |
| E7EU94_HUMAN      | Q32Q10_HUMAN | RSU1   | Q32Q10 | RSU1 protein (Fragment)                                                                                                                                                                                                      | 31 kDa  | 0.1   | 8   | 6   | 2   | 0  | 2  | 4  | 0  | 0 | 1 | 1  | 1 | 1 | 1 | 1.992553376 | 0% (0.19)      |
| A7E2E5_HUMAN (+1) | MBD2_HUMAN   | MBD2   | Q9UBB5 | Methyl-CpG-binding domain protein 2 (Demethylase) (DMTase) (Methyl-CpG-binding protein MBD2)                                                                                                                                 | 43 kDa  | 0.022 | 8   | 6   | 2   | 1  | 2  | 1  | 2  | 0 | 0 | 0  | 2 | 2 | 2 | 1.992553376 | 0% (0.19)      |
| E9PDC5_HUMAN (+2) | B4DE65_HUMAN |        | B4DE65 | cDNA FLJ57705, highly similar to Acid sphingomyelinase-like phosphodiesterase 3b (EC 3.1.4.-)                                                                                                                                | 43 kDa  | 0.04  | 8   | 6   | 2   | 6  | 0  | 0  | 0  | 2 | 0 | 0  | 0 | 0 | 0 | 1.992553376 | 0% (0.19)      |
| A8K6A6_HUMAN (+2) | A8K8K1_HUMAN |        | A8K8K1 | cDNA FLJ76936, highly similar to Homo sapiens RNA terminal phosphate cyclase domain 1 (RTCD1), mRNA                                                                                                                          | 39 kDa  | 0.042 | 8   | 6   | 2   | 0  | 2  | 0  | 4  | 1 | 1 | 0  | 0 | 0 | 0 | 1.992553376 | 0% (0.19)      |
| B7Z7E4_HUMAN      | B7Z8X5_HUMAN |        | B7Z8X5 | cDNA FLJ61541, highly similar to Homo sapiens PDZ and LIM domain 5 (PDLIM5), transcript variant 2, mRNA                                                                                                                      | 53 kDa  | 0.088 | 8   | 6   | 2   | 2  | 3  | 1  | 0  | 0 | 0 | 2  | 0 | 0 | 0 | 1.992553376 | 0% (0.19)      |
| AOFA_HUMAN (+2)   | NDUB7_HUMAN  | NDUBF7 | P17568 | NADH dehydrogenase [ubiquinone] 1 beta subcomplex subunit 7 (Cell adhesion protein SQM1) (Complex I-B18) (CI-B18) (NADH-ubiquinone oxidoreductase B18 subunit)                                                               | 16 kDa  | 0.046 | 8   | 6   | 2   | 2  | 1  | 2  | 1  | 1 | 0 | 1  | 0 | 0 | 0 | 1.992553376 | 0% (0.19)      |

|                   |              |          |        |                                                                                                                                                                                                                    |        |       |    |    |    |    |    |   |    |   |   |   |   |    |     |
|-------------------|--------------|----------|--------|--------------------------------------------------------------------------------------------------------------------------------------------------------------------------------------------------------------------|--------|-------|----|----|----|----|----|---|----|---|---|---|---|----|-----|
| Q53GD8_HUMAN      | B4DRE6_HUMAN | SPATS2L  | B4DRE6 | SPATS2-like protein (cDNA FLJ59743, weakly similar to Mus musculus spermatogenesis associated, serine-rich 2 (Spats2), mRNA)                                                                                       | 63 kDa | 0.11  | 8  | 6  | 2  | 0  | 3  | 2 | 1  | 0 | 0 | 2 | 0 | -  | 0%  |
| GSTM4_HUMAN       | B4DVL2_HUMAN | NAAA     | B4DVL2 | N-acyl ethanolamine-hydrolyzing acid amidase (cDNA FLJ54891, highly similar to N-acyl ethanolamine-hydrolyzing acid amidase (EC 3.5.1.-))                                                                          | 28 kDa | 0.26  | 8  | 6  | 2  | 1  | 2  | 2 | 1  | 0 | 0 | 1 | 1 | -  | 0%  |
| A4D212_HUMAN (+1) | FKB1A_HUMAN  | FKBP1A   | P62942 | Peptidyl-prolyl cis-trans isomerase FKBP1A (PPIase FKBP1A) (EC 5.2.1.8) (12 kDa FK506-binding protein) (12 kDa FKBP) (FKBP-12) (Calstabin-1) (FK506-binding protein 1A) (FKBP-1A) (Immunophilin FKBP12) (Rotamase) | 12 kDa | 0.01  | 8  | 6  | 2  | 0  | 1  | 1 | 4  | 1 | 0 | 1 | 0 | -  | 0%  |
| Q59GW6_HUMAN      | RET1_HUMAN   | RBP1     | P09455 | Retinol-binding protein 1 (Cellular retinol-binding protein) (CRBP) (Cellular retinol-binding protein I) (CRBP-1)                                                                                                  | 16 kDa | 0.11  | 8  | 6  | 2  | 1  | 1  | 0 | 4  | 0 | 2 | 0 | 0 | -  | 0%  |
| IGHG2_HUMAN (+1)  | 41_HUMAN     | EPB41    | P11171 | Protein 4.1 (P4.1) (4.1R) (Band 4.1) (EPB4.1)                                                                                                                                                                      | 97 kDa | 0.23  | 8  | 6  | 2  | 0  | 3  | 1 | 0  | 1 | 0 | 0 | - | 0% |     |
| Q6QNY7_HUMAN      | B3KR61_HUMAN | NDUFA5   | B3KR61 | HCG1811060, isoform CRA_c (NADH dehydrogenase [ubiquinone] 1 alpha subcomplex assembly factor 5) (cDNA FLJ33741 fis, clone BRAWH2018875, weakly similar to Protein At1g22800)                                      | 30 kDa | 0.055 | 8  | 6  | 2  | 1  | 1  | 1 | 3  | 2 | 0 | 0 | - | 0% |     |
| LAR4B_HUMAN       | B4DDP6_HUMAN | DBNL     | B4DDP6 | Drebrin-like protein (cDNA FLJ52531, highly similar to Drebrin-like protein)                                                                                                                                       | 43 kDa | 0.031 | 21 | 15 | 6  | 3  | 2  | 5 | 5  | 3 | 2 | 0 | 1 | -  | 0%  |
| PTGR1_HUMAN       | A8KAH7_HUMAN |          | A8KAH7 | cDNA FLJ75444, highly similar to Homo sapiens protein kinase, cAMP-dependent, regulatory, type II, alpha (PRKAR2A), mRNA                                                                                           | 46 kDa | 0.067 | 21 | 15 | 6  | 2  | 5  | 3 | 5  | 2 | 3 | 1 | 0 | -  | 0%  |
| ENOPH_HUMAN (+1)  | BCAT1_HUMAN  | BCAT1    | P54687 | Branched-chain-amino-acid aminotransferase, cytosolic (BCAT(c)) (EC 2.6.1.42) (Protein ECA39)                                                                                                                      | 43 kDa | 0.092 | 21 | 15 | 6  | 0  | 9  | 6 | 0  | 0 | 5 | 1 | 0 | -  | 0%  |
| F210B_HUMAN       | JAGN1_HUMAN  | JAGN1    | Q8N5M9 | Protein jagunal homolog 1                                                                                                                                                                                          | 21 kDa | 0.15  | 21 | 15 | 6  | 7  | 3  | 1 | 4  | 2 | 4 | 0 | 0 | -  | 0%  |
| B4DQ05_HUMAN      | FLOT2_HUMAN  | FLOT2    | Q14254 | Flotillin-2 (Epidermal surface antigen) (ESA) (Membrane component chromosome 17 surface marker 1)                                                                                                                  | 47 kDa | 0.047 | 71 | 49 | 21 | 23 | 10 | 8 | 10 | 2 | 9 | 3 | 7 | -  | 95% |
| RPP30_HUMAN       | H6A2E0_HUMAN | HLA-B    | H6A2E0 | MHC class I antigen (Fragment)                                                                                                                                                                                     | 21 kDa | 0.21  | 54 | 38 | 16 | 0  | 9  | 0 | 15 | 0 | 0 | 7 | 0 | -  | 95% |
| AGM1_HUMAN (+1)   | IF2A_HUMAN   | EIF2S1   | P05198 | Eukaryotic translation initiation factor 2 subunit 1 (Eukaryotic translation initiation factor 2 subunit alpha) (eIF-2-alpha) (eIF-2A) (eIF-2alpha)                                                                | 36 kDa | 0.033 | 18 | 13 | 5  | 0  | 7  | 6 | 0  | 3 | 2 | 0 | 0 | -  | 0%  |
| E7EQ01_HUMAN      | RETST_HUMAN  | RETSAT   | Q6NUM9 | All-trans-retinol 13,14-reductase (EC 1.3.99.23) (All-trans-13,14-dihydroretinol saturase) (RetSat) (PPAR-alpha-regulated and starvation-induced gene protein)                                                     | 67 kDa | 0.31  | 18 | 13 | 5  | 9  | 1  | 1 | 2  | 0 | 1 | 1 | 3 | -  | 0%  |
| AATC_HUMAN (+1)   | A8K4M4_HUMAN |          | A8K4M4 | cDNA FLJ75329, highly similar to Homo sapiens LAG1 longevity assurance homolog 2 (S. cerevisiae), transcript variant 2, mRNA                                                                                       | 45 kDa | 0.061 | 18 | 13 | 5  | 4  | 3  | 3 | 3  | 0 | 1 | 2 | 2 | -  | 0%  |
| A0AV58_HUMAN      | Q30077_HUMAN | HLA-DQB1 | Q30077 | MHC class II HLA-DQ-beta-1 (Fragment)                                                                                                                                                                              | 26 kDa | 0.045 | 17 | 13 | 5  | 0  | 5  | 6 | 1  | 0 | 0 | 0 | 5 | -  | 0%  |

|                   |              |          |        |                                                                                                                                                                                                          |        |       |    |    |    |    |    |    |    |   |   |    |    |   |     |
|-------------------|--------------|----------|--------|----------------------------------------------------------------------------------------------------------------------------------------------------------------------------------------------------------|--------|-------|----|----|----|----|----|----|----|---|---|----|----|---|-----|
| ARI1A_HUMAN       | DYN2_HUMAN   | DNM2     | P50570 | Dynamine-2 (EC 3.6.5.5)                                                                                                                                                                                  | 98 kDa | 0.018 | 28 | 20 | 8  | 0  | 1  | 9  | 9  | 5 | 3 | 1  | 0  | - | 95% |
| VANG1_HUMAN       | A0S1I7_HUMAN | COX1     | A0S1I7 | Cytochrome c oxidase subunit 1 (EC 1.9.3.1) (Fragment)                                                                                                                                                   | 57 kDa | 0.097 | 27 | 20 | 8  | 8  | 4  | 5  | 2  | 2 | 2 | 1  | 3  | - | 95% |
| GALT7_HUMAN       | OCAD2_HUMAN  | OCIAD2   | Q56VL3 | OCIA domain-containing protein 2 (Ovarian carcinoma immunoreactive antigen-like protein)                                                                                                                 | 17 kDa | 0.04  | 38 | 27 | 11 | 14 | 7  | 3  | 3  | 2 | 4 | 1  | 4  | - | 95% |
| LRC8C_HUMAN       | Q6FGL0_HUMAN | LGALS3   | Q6FGL0 | Galectin (Fragment)                                                                                                                                                                                      | 26 kDa | 0.059 | 48 | 34 | 14 | 10 | 6  | 3  | 15 | 2 | 5 | 4  | 3  | - | 95% |
| Q6NUR1_HUMAN      | B2R7U4_HUMAN |          | B2R7U4 | cDNA, FLJ93605, highly similar to Homo sapiens heme oxygenase (decycling) 1 (HMOX1), mRNA                                                                                                                | 33 kDa | 0.026 | 58 | 41 | 17 | 4  | 13 | 18 | 5  | 0 | 2 | 9  | 6  | - | 95% |
| A8K070_HUMAN (+2) | B2R4M6_HUMAN |          | B2R4M6 | cDNA, FLJ92148, highly similar to Homo sapiens S100 calcium binding protein A9 (calgranulin B) (S100A9), mRNA                                                                                            | 13 kDa | 0.049 | 99 | 69 | 29 | 3  | 22 | 32 | 13 | 1 | 4 | 12 | 11 | - | 95% |
| J3QRV5_HUMAN (+1) | B3KS62_HUMAN |          | B3KS62 | cDNA FLJ35573 fis, clone SPLEN2005927, highly similar to Tripartite motif-containing protein 4                                                                                                           | 54 kDa | 0.039 | 2  | 4  | 1  | 1  | 0  | 1  | 0  | 0 | 1 | 0  | 0  | - | 0%  |
| B4DM85_HUMAN (+1) | PDIA5_HUMAN  | PDIA5    | Q14554 | Protein disulfide-isomerase A5 (EC 5.3.4.1) (Protein disulfide isomerase-related protein)                                                                                                                | 60 kDa | 0.059 | 5  | 4  | 1  | 3  | 1  | 0  | 0  | 1 | 0 | 0  | 0  | - | 0%  |
| LSG1_HUMAN        | F5GXA0_HUMAN | SUMF1    | F5GXA0 | Sulfatase-modifying factor 1                                                                                                                                                                             | 47 kDa | 0.029 | 5  | 4  | 1  | 1  | 0  | 3  | 0  | 0 | 0 | 0  | 1  | - | 0%  |
| A6NHHS_HUMAN      | LTOR4_HUMAN  | LAMTOR4  | Q0VGL1 | Ragulator complex protein LAMTOR4 (Late endosomal/lysosomal adaptor and MAPK and MTOR activator 4) [Cleaved into: Ragulator complex protein LAMTOR4, N-terminally processed]                             | 11 kDa | 0.12  | 6  | 4  | 1  | 0  | 2  | 0  | 2  | 0 | 0 | 1  | 0  | - | 0%  |
| AT11A_HUMAN (+3)  | ABC3G_HUMAN  | APOBEC3G | Q9HC16 | DNA dC->dU-editing enzyme APOBEC-3G (EC 3.5.4.-) (APOBEC-related cytidine deaminase) (APOBEC-related protein) (ARCD) (APOBEC-related protein 9) (ARP-9) (CEM-15) (CEM15) (Deoxycytidine deaminase) (A3G) | 46 kDa | 0.022 | 5  | 4  | 1  | 0  | 3  | 1  | 0  | 1 | 0 | 0  | 0  | - | 0%  |
| RENT2_HUMAN       | SPG21_HUMAN  | SPG21    | Q9NZD8 | Maspardin (Acid cluster protein 33) (Spastic paraplegia 21 autosomal recessive Mast syndrome protein) (Spastic paraplegia 21 protein)                                                                    | 35 kDa | 0.024 | 5  | 4  | 1  | 1  | 3  | 0  | 0  | 0 | 0 | 0  | 1  | - | 0%  |
| Q9Y3E8_HUMAN      | ACOC_HUMAN   | ACO1     | P21399 | Cytoplasmic aconitate hydratase (Aconitase) (EC 4.2.1.3) (Citrate hydro-lyase) (Ferritin repressor protein) (Iron regulatory protein 1) (IRP1) (Iron-responsive element-binding protein 1) (IRE-BP 1)    | 98 kDa | 0.05  | 5  | 4  | 1  | 0  | 3  | 1  | 0  | 1 | 0 | 0  | 0  | - | 0%  |
| B2R6H7_HUMAN (+2) | Q8WVC2_HUMAN | RPS21    | Q8WVC2 | 40S ribosomal protein S21                                                                                                                                                                                | 9 kDa  | 0.035 | 5  | 4  | 1  | 0  | 2  | 2  | 0  | 1 | 0 | 0  | 0  | - | 0%  |
| B4DIH5_HUMAN (+3) | SUSD2_HUMAN  | SUSD2    | Q9UGT4 | Sushi domain-containing protein 2                                                                                                                                                                        | 90 kDa | 0.095 | 5  | 4  | 1  | 0  | 2  | 2  | 0  | 0 | 0 | 1  | 0  | - | 0%  |
| B3KQO0_HUMAN (+1) | B7Z2R7_HUMAN |          | B7Z2R7 | Acyl-CoA-binding domain-containing protein 5                                                                                                                                                             | 59 kDa | 0.075 | 5  | 4  | 1  | 3  | 1  | 0  | 1  | 0 | 0 | 0  | 1  | - | 0%  |
| MISP_HUMAN        | ADDG_HUMAN   | ADD3     | Q9UEY8 | Gamma-adducin (Adducin-like protein 70)                                                                                                                                                                  | 79 kDa | 0.016 | 5  | 4  | 1  | 0  | 1  | 3  | 0  | 0 | 0 | 1  | 0  | - | 0%  |
| B3KM36_HUMAN (+2) | PPCS_HUMAN   | PPCS     | Q9HAB8 | Phosphopantothenate--cysteine ligase (EC 6.3.2.5) (Phosphopantothenoylcysteine synthetase) (PPC synthetase)                                                                                              | 34 kDa | 0.081 | 5  | 4  | 1  | 0  | 1  | 1  | 2  | 0 | 1 | 0  | 0  | - | 0%  |

|                   |              |         |        |                                                                                                                                                                                                                                                                                                                                                                                                                                                                                                                         |         |       |     |     |     |    |     |     |     |    |    |    |    |             |                 |           |
|-------------------|--------------|---------|--------|-------------------------------------------------------------------------------------------------------------------------------------------------------------------------------------------------------------------------------------------------------------------------------------------------------------------------------------------------------------------------------------------------------------------------------------------------------------------------------------------------------------------------|---------|-------|-----|-----|-----|----|-----|-----|-----|----|----|----|----|-------------|-----------------|-----------|
| SSFA2_HUMAN       | E9PLS9_HUMAN | TM7SF2  | E9PLS9 | Delta(14)-sterol reductase (Fragment)                                                                                                                                                                                                                                                                                                                                                                                                                                                                                   | 30 kDa  | 0.017 | 5   | 4   | 1   | 2  | 0   | 0   | 2   | 0  | 0  | 0  | 1  | -           | 0%              |           |
| B4DEF8_HUMAN (+1) | A6PVNS_HUMAN | PPP2R4  | A6PVNS | Serine/threonine-protein phosphatase 2A activator                                                                                                                                                                                                                                                                                                                                                                                                                                                                       | 37 kDa  | 0.079 | 5   | 4   | 1   | 0  | 0   | 0   | 4   | 0  | 1  | 0  | 0  | 2.084141449 | 0% (0.23)       |           |
| RM16_HUMAN        | D3DSU3_HUMAN | KIF13B  | D3DSU3 | Kinesin family member 13B, isoform CRA_a                                                                                                                                                                                                                                                                                                                                                                                                                                                                                | 175 kDa | 0.14  | 5   | 4   | 1   | 1  | 1   | 2   | 0   | 0  | 0  | 0  | 0  | 2.084141449 | 0% (0.23)       |           |
| CLCA_HUMAN (+1)   | DHB8_HUMAN   | HSD17B8 | Q92506 | Estradiol 17-beta-dehydrogenase 8 (EC 1.1.1.62) (17-beta-hydroxysteroid dehydrogenase 8) (17-beta-HSD 8) (3-oxoacyl-[acyl-carrier-protein] reductase) (EC 1.1.1.-) (Protein Ke6) (Ke-6) (Really interesting new gene 2 protein) (Testosterone 17-beta-dehydrogenase 8) (EC 1.1.1.239)                                                                                                                                                                                                                                   | 27 kDa  | 0.069 | 5   | 4   | 1   | 1  | 1   | 0   | 2   | 1  | 0  | 0  | 0  | 2.084141449 | 0% (0.23)       |           |
| NADE_HUMAN        | TIM13_HUMAN  | TIMM13  | Q9Y5L4 | Mitochondrial import inner membrane translocase subunit Tim13                                                                                                                                                                                                                                                                                                                                                                                                                                                           | 11 kDa  | 0.044 | 5   | 4   | 1   | 0  | 0   | 1   | 3   | 0  | 0  | 1  | 0  | 2.084141449 | 0% (0.23)       |           |
| RCL1_HUMAN        | B3GN3_HUMAN  | B3GNT3  | Q9Y2A9 | UDP-GlcNAc:betaGal beta-1,3-N-acetylglucosaminyltransferase 3 (BGnT-3) (Beta-1,3-Gn-T3) (Beta-1,3-N-acetylglucosaminyltransferase 3) (Beta3Gn-T3) (EC 2.4.1.-) (Beta-1,3-galactosyltransferase 8) (Beta-1,3-GalTase 8) (Beta3Gal-T8) (Beta3GalT8) (b3Gal-T8) (Beta-3-Gx-T8) (Core 1 extending beta-1,3-N-acetylglucosaminyltransferase) (Core1-beta3GlcNAcT) (Transmembrane protein 3) (UDP-Gal:beta-GlcNAc beta-1,3-galactosyltransferase 8) (UDP-galactose:beta-N-acetylglucosamine beta-1,3-galactosyltransferase 8) | 43 kDa  | 0.1   | 5   | 4   | 1   | 3  | 0   | 0   | 1   | 1  | 0  | 0  | 0  | 0           | 2.084141449     | 0% (0.23) |
| Q96AD0_HUMAN (+1) | AL1A1_HUMAN  | ALDH1A1 | P00352 | Retinal dehydrogenase 1 (RALDH 1) (RALDH1) (EC 1.2.1.36) (ALDH-E1) (ALHD1) (Aldehyde dehydrogenase family 1 member A1) (Aldehyde dehydrogenase, cytosolic)                                                                                                                                                                                                                                                                                                                                                              | 55 kDa  | 0.12  | 5   | 4   | 1   | 0  | 2   | 2   | 0   | 1  | 0  | 0  | 0  | 2.084141449 | 0% (0.23)       |           |
| UIF_HUMAN         | WFS1_HUMAN   | WFS1    | O76024 | Wolframin                                                                                                                                                                                                                                                                                                                                                                                                                                                                                                               | 100 kDa | 0.094 | 15  | 11  | 4   | 5  | 5   | 1   | 0   | 0  | 3  | 0  | 0  | 2.084238965 | 0% (0.091)      |           |
| SRP09_HUMAN       | B2R802_HUMAN |         | B2R802 | cDNA, FLJ93681, highly similar to Homo sapiens small nuclear ribonucleoprotein polypeptide A (SNRPA), mRNA                                                                                                                                                                                                                                                                                                                                                                                                              | 31 kDa  | 0.35  | 26  | 18  | 7   | 1  | 8   | 7   | 3   | 0  | 0  | 3  | 4  | 2.084336498 | 95% (0.042)     |           |
| B4DL79_HUMAN (+1) | B2R673_HUMAN |         | B2R673 | cDNA, FLJ92818, highly similar to Homo sapiens pyruvate dehydrogenase complex, component X (PDHX), mRNA                                                                                                                                                                                                                                                                                                                                                                                                                 | 54 kDa  | 0.025 | 35  | 25  | 10  | 9  | 7   | 3   | 5   | 5  | 2  | 2  | 1  | 2.084434049 | 95% (0.020)     |           |
| B3KQV7_HUMAN      | ITB4_HUMAN   | ITGB4   | P16144 | Integrin beta-4 (GP150) (CD antigen CD104)                                                                                                                                                                                                                                                                                                                                                                                                                                                                              | 202 kDa | 0.045 | 55  | 39  | 16  | 30 | 4   | 4   | 1   | 2  | 0  | 2  | 12 | 2.084629203 | 95% (0.0050)    |           |
| B4DJ54_HUMAN (+1) | FA49B_HUMAN  | FAM49B  | Q9NUQ9 | Protein FAM49B (L1)                                                                                                                                                                                                                                                                                                                                                                                                                                                                                                     | 37 kDa  | 0.094 | 31  | 23  | 9   | 1  | 11  | 5   | 6   | 0  | 4  | 4  | 1  | 2.113461476 | 95% (0.023)     |           |
| FA50A_HUMAN       | C8C504_HUMAN | HBB     | C8C504 | Beta-globin                                                                                                                                                                                                                                                                                                                                                                                                                                                                                                             | 16 kDa  | 0.08  | 515 | 360 | 151 | 22 | 113 | 124 | 105 | 25 | 35 | 37 | 55 | 2.124486189 | 95% (< 0.00010) |           |
| STAT2_HUMAN       | PCAT2_HUMAN  | LPCAT2  | Q7L5N7 | Lysophosphatidylcholine acyltransferase 2 (LPC acyltransferase 2) (LPCAT-2) (LyoPC acyltransferase 2) (EC 2.3.1.23) (1-acylglycerol-3-phosphate O-acyltransferase 11) (1-AGP acyltransferase 11) (1-AGPAT 11) (EC                                                                                                                                                                                                                                                                                                       | 60 kDa  | 0.047 | 12  | 9   | 3   | 5  | 2   | 2   | 0   | 0  | 0  | 1  | 2  | 2.154273044 | 0% (0.11)       |           |



|                   |              |           |        |                                                                                                                                                                                                                                                                                                                                                               |        |       |    |    |    |    |    |    |    |   |   |   |   |   |             |              |
|-------------------|--------------|-----------|--------|---------------------------------------------------------------------------------------------------------------------------------------------------------------------------------------------------------------------------------------------------------------------------------------------------------------------------------------------------------------|--------|-------|----|----|----|----|----|----|----|---|---|---|---|---|-------------|--------------|
|                   |              |           |        | 2.3.1.51) (1-acylglycerophosphocholine O-acyltransferase) (1-alkylglycerophosphocholine O-acyltransferase) (EC 2.3.1.67) (Acetyl-CoA:lyso-platelet-activating factor acetyltransferase) (Acetyl-CoA:lyso-PAF acetyltransferase) (Lyso-PAF acetyltransferase) (LysoPAFAT) (Acyltransferase-like 1) (Lysophosphatidic acid acyltransferase alpha) (LPAAT-alpha) |        |       |    |    |    |    |    |    |    |   |   |   |   |   |             |              |
| GAS6_HUMAN (+1)   | B4DIY7_HUMAN | TAMM41    | B4DIY7 | Mitochondrial translocator assembly and maintenance protein 41 homolog (cDNA FLJ60579)                                                                                                                                                                                                                                                                        | 51 kDa | 0.028 | 13 | 9  | 3  | 4  | 2  | 2  | 1  | 2 | 1 | 0 | 0 | - | 2.154273044 | 0% (0.11)    |
| CATG_HUMAN        | A8K3W7_HUMAN |           | A8K3W7 | cDNA FLJ76271, highly similar to Homo sapiens protein O-fucosyltransferase 2 (POFUT2), transcript variant 3, mRNA                                                                                                                                                                                                                                             | 50 kDa | 0.086 | 12 | 9  | 3  | 2  | 4  | 3  | 0  | 3 | 0 | 0 | 0 | - | 2.154273044 | 0% (0.11)    |
| B4DI03_HUMAN (+2) | A2A3U5_HUMAN | hCG_20471 | A2A3U5 | HCG20471, isoform CRA_d (cDNA FLJ76396, highly similar to Homo sapiens opioid receptor, sigma 1 (OPRS1), transcript variant 2, mRNA)                                                                                                                                                                                                                          | 21 kDa | 0.18  | 11 | 9  | 3  | 1  | 2  | 4  | 2  | 1 | 1 | 1 | 0 | - | 2.154273044 | 0% (0.11)    |
| A8K5G0_HUMAN (+2) | D6W5X3_HUMAN | SLC12A9   | D6W5X3 | Solute carrier family 12 (Potassium/chloride transporters), member 9, isoform CRA_d                                                                                                                                                                                                                                                                           | 69 kDa | 0.015 | 12 | 9  | 3  | 3  | 2  | 3  | 1  | 0 | 0 | 0 | 3 | - | 2.154273044 | 0% (0.11)    |
| B7Z4C3_HUMAN (+2) | B4DKR0_HUMAN | STX5      | B4DKR0 | Syntaxin 5A, isoform CRA_c (Syntaxin-5) (cDNA FLJ57518, highly similar to Syntaxin-5)                                                                                                                                                                                                                                                                         | 29 kDa | 0.052 | 12 | 9  | 3  | 2  | 3  | 2  | 2  | 1 | 0 | 1 | 1 | - | 2.154273044 | 0% (0.11)    |
| E7ESY4_HUMAN (+1) | FAM3C_HUMAN  | FAM3C     | Q92520 | Protein FAM3C (Interleukin-like EMT inducer)                                                                                                                                                                                                                                                                                                                  | 25 kDa | 0.064 | 70 | 50 | 20 | 18 | 10 | 8  | 14 | 4 | 5 | 5 | 6 | - | 2.15488146  | 95% (0.0012) |
| DDX54_HUMAN       | DHRS7_HUMAN  | DHRS7     | Q9Y394 | Dehydrogenase/reductase SDR family member 7 (EC 1.1.-.-) (Retinal short-chain dehydrogenase/reductase 4) (retSDR4)                                                                                                                                                                                                                                            | 38 kDa | 0.039 | 53 | 38 | 15 | 18 | 8  | 7  | 5  | 0 | 5 | 3 | 7 | - | 2.157938155 | 95% (0.0041) |
| B7ZMD7_HUMAN      | B2RBL3_HUMAN |           | B2RBL3 | cDNA, FLJ95575, highly similar to Homo sapiens endothelial cell growth factor 1 (platelet-derived) (ECGF1), mRNA                                                                                                                                                                                                                                              | 50 kDa | 0.13  | 53 | 38 | 15 | 0  | 12 | 8  | 18 | 0 | 4 | 8 | 3 | - | 2.157938155 | 95% (0.0041) |
| PKHG3_HUMAN       | LRC8A_HUMAN  | LRRC8A    | Q81WT6 | Leucine-rich repeat-containing protein 8A                                                                                                                                                                                                                                                                                                                     | 94 kDa | 0.027 | 19 | 14 | 5  | 3  | 5  | 5  | 1  | 1 | 0 | 1 | 3 | - | 2.179571127 | 0% (0.055)   |
| B4DN34_HUMAN (+2) | B4E2S3_HUMAN |           | B4E2S3 | cDNA FLJ56561                                                                                                                                                                                                                                                                                                                                                 | 87 kDa | 0.19  | 19 | 14 | 5  | 1  | 4  | 6  | 3  | 0 | 1 | 3 | 1 | - | 2.179571127 | 0% (0.055)   |
| ANO10_HUMAN       | CAPR1_HUMAN  | CAPRIN1   | Q14444 | Caprin-1 (Cell cycle-associated protein 1) (Cytoplasmic activation- and proliferation-associated protein 1) (GPI-anchored membrane protein 1) (GPI-anchored protein p137) (GPI-p137) (p137GPI) (Membrane component chromosome 11 surface marker 1) (RNA granule protein 105)                                                                                  | 78 kDa | 0.036 | 19 | 14 | 5  | 2  | 6  | 5  | 1  | 1 | 0 | 2 | 2 | - | 2.179571127 | 0% (0.055)   |
| AIFM2_HUMAN       | MCM6_HUMAN   | MCM6      | Q14566 | DNA replication licensing factor MCM6 (EC 3.6.4.12) (p105MCM)                                                                                                                                                                                                                                                                                                 | 93 kDa | 0.072 | 26 | 19 | 7  | 0  | 9  | 11 | 0  | 5 | 1 | 1 | 0 | - | 2.192641896 | 95% (0.030)  |
| E9PE17_HUMAN (+3) | CHP1_HUMAN   | CHP1      | Q99653 | Calcineurin B homologous protein 1 (Calcineurin B-like protein) (Calcium-binding protein CHP) (Calcium-binding protein p22) (EF-hand calcium-binding domain-containing protein p22)                                                                                                                                                                           | 22 kDa | 0.14  | 33 | 24 | 9  | 12 | 3  | 4  | 5  | 1 | 3 | 1 | 3 | - | 2.200642808 | 95% (0.016)  |

|                   |              |          |        |                                                                                                                                                                                                                                                                                                           |         |       |    |    |    |    |   |    |    |   |   |   |    |   |              |
|-------------------|--------------|----------|--------|-----------------------------------------------------------------------------------------------------------------------------------------------------------------------------------------------------------------------------------------------------------------------------------------------------------|---------|-------|----|----|----|----|---|----|----|---|---|---|----|---|--------------|
| Q4G1C4_HUMAN (+1) | B4E3A8_HUMAN |          | B4E3A8 | cDNA FLJ53963, highly similar to Leukocyte elastase inhibitor                                                                                                                                                                                                                                             | 39 kDa  | 0.066 | 64 | 47 | 18 | 15 | 7 | 12 | 13 | 1 | 4 | 3 | 10 | - | 95% (0.0011) |
| PLP2_HUMAN        | Q4AEJ3_HUMAN | hfzo1    | Q4AEJ3 | Mitochondrial transmembrane GTPase Fzo-1                                                                                                                                                                                                                                                                  | 84 kDa  | 0.18  | 23 | 17 | 6  | 7  | 4 | 4  | 2  | 3 | 1 | 1 | 2  | - | 95% (0.033)  |
| ARPSL_HUMAN (+1)  | ATP5L_HUMAN  | ATP5L    | P56385 | ATP synthase subunit e, mitochondrial (ATPase subunit e)                                                                                                                                                                                                                                                  | 8 kDa   | 0.16  | 23 | 17 | 6  | 3  | 2 | 4  | 8  | 0 | 2 | 3 | 1  | - | 95% (0.033)  |
| CBX1_HUMAN (+1)   | BPHL_HUMAN   | BPHL     | Q86WA6 | Valacyclovir hydrolase (VACVase) (Valacyclovirase) (EC 3.1.-.-) (Biphenyl hydrolase-like protein) (Biphenyl hydrolase-related protein) (Bph-rp) (Breast epithelial mucin-associated antigen) (MCNAA)                                                                                                      | 33 kDa  | 0.24  | 23 | 17 | 6  | 3  | 1 | 5  | 8  | 0 | 0 | 1 | 5  | - | 95% (0.033)  |
| B4DXB6_HUMAN (+2) | A9CQZ8_HUMAN | TJP1     | A9CQZ8 | Tight junction protein ZO-1 (Fragment)                                                                                                                                                                                                                                                                    | 197 kDa | 0.066 | 16 | 12 | 4  | 3  | 4 | 3  | 2  | 3 | 0 | 1 | 0  | - | 0% (0.062)   |
| OSBP1_HUMAN       | S2540_HUMAN  | SLC25A40 | Q8TBP6 | Solute carrier family 25 member 40 (Mitochondrial carrier family protein)                                                                                                                                                                                                                                 | 38 kDa  | 0.036 | 16 | 12 | 4  | 1  | 4 | 2  | 5  | 0 | 0 | 1 | 3  | - | 0% (0.062)   |
| A6NFN2_HUMAN (+7) | PDC10_HUMAN  | PDCD10   | Q9BUL8 | Programmed cell death protein 10 (Cerebral cavernous malformations 3 protein) (TF-1 cell apoptosis-related protein 15)                                                                                                                                                                                    | 25 kDa  | 0.053 | 16 | 12 | 4  | 1  | 4 | 1  | 7  | 2 | 1 | 0 | 1  | - | 0% (0.062)   |
| VSIG4_HUMAN       | CMPK2_HUMAN  | CMPK2    | Q5EBM0 | UMP-CMP kinase 2, mitochondrial (EC 2.7.4.14) (Nucleoside-diphosphate kinase) (EC 2.7.4.6)                                                                                                                                                                                                                | 49 kDa  | 0.068 | 16 | 12 | 4  | 0  | 1 | 1  | 10 | 0 | 4 | 0 | 0  | - | 0% (0.062)   |
| C9JLU1_HUMAN (+1) | WDR5_HUMAN   | WDR5     | P61964 | WD repeat-containing protein 5 (BMP2-induced 3-kb gene protein)                                                                                                                                                                                                                                           | 37 kDa  | 0.26  | 16 | 12 | 4  | 1  | 4 | 3  | 4  | 1 | 0 | 1 | 2  | - | 0% (0.062)   |
| RPB7_HUMAN        | E9PHY8_HUMAN | MROH1    | E9PHY8 | Maestro heat-like repeat-containing protein family member 1                                                                                                                                                                                                                                               | 180 kDa | 0.17  | 9  | 7  | 2  | 5  | 0 | 0  | 2  | 1 | 0 | 1 | 0  | - | 0% (0.12)    |
| J3QK90_HUMAN (+5) | H0Y858_HUMAN |          | H0Y858 | Uncharacterized protein (Fragment)                                                                                                                                                                                                                                                                        | 134 kDa | 0.1   | 9  | 7  | 2  | 0  | 2 | 1  | 4  | 0 | 2 | 0 | 0  | - | 0% (0.12)    |
| B4DT01_HUMAN (+1) | B4DHN5_HUMAN | SDCBP    | B4DHN5 | Syntenin-1 (cDNA FLJ50555, moderately similar to Syntenin-1)                                                                                                                                                                                                                                              | 26 kDa  | 0.075 | 10 | 7  | 2  | 1  | 2 | 2  | 2  | 0 | 1 | 0 | 1  | - | 0% (0.12)    |
| FINC_HUMAN        | Q53EL1_HUMAN |          | Q53EL1 | Protein KIAA0196 variant (Fragment)                                                                                                                                                                                                                                                                       | 135 kDa | 0.19  | 9  | 7  | 2  | 1  | 5 | 0  | 1  | 0 | 2 | 0 | 1  | - | 0% (0.12)    |
| M0QYR6_HUMAN (+2) | E5KSX8_HUMAN |          | E5KSX8 | Mitochondrial transcription factor A                                                                                                                                                                                                                                                                      | 29 kDa  | 0.13  | 8  | 7  | 2  | 3  | 1 | 1  | 2  | 0 | 1 | 0 | 1  | - | 0% (0.12)    |
| CC127_HUMAN       | B2RAN1_HUMAN |          | B2RAN1 | cDNA, FLJ95012, highly similar to Homo sapiens UDP-glucose pyrophosphorylase 2 (UGP2), mRNA                                                                                                                                                                                                               | 57 kDa  | 0.1   | 9  | 7  | 2  | 0  | 1 | 1  | 5  | 1 | 1 | 0 | 0  | - | 0% (0.12)    |
| PSB5_HUMAN        | AHSA1_HUMAN  | AHSA1    | O95433 | Activator of 90 kDa heat shock protein ATPase homolog 1 (AHA1) (p38)                                                                                                                                                                                                                                      | 38 kDa  | 0.099 | 9  | 7  | 2  | 0  | 3 | 0  | 4  | 1 | 0 | 1 | 0  | - | 0% (0.12)    |
| MAN1_HUMAN        | LTOR5_HUMAN  | LAMTOR5  | O43504 | Ragulator complex protein LAMTOR5 (Hepatitis B virus X-interacting protein) (HBV X-interacting protein) (Late endosomal/lysosomal adaptor and MAPK and MTOR activator 5)                                                                                                                                  | 10 kDa  | 0.027 | 9  | 7  | 2  | 3  | 2 | 2  | 1  | 0 | 0 | 1 | 1  | - | 0% (0.12)    |
| G9LJ35_HUMAN      | F5H7V7_HUMAN | NDUFA8   | F5H7V7 | NADH dehydrogenase [ubiquinone] 1 alpha subcomplex subunit 8                                                                                                                                                                                                                                              | 15 kDa  | 0.043 | 9  | 7  | 2  | 3  | 1 | 1  | 2  | 0 | 1 | 1 | 0  | - | 0% (0.12)    |
| E9PLS9_HUMAN (+1) | AP1S1_HUMAN  | AP1S1    | P61966 | AP-1 complex subunit sigma-1A (Adapter-related protein complex 1 subunit sigma-1A) (Adaptor protein complex AP-1 subunit sigma-1A) (Clathrin assembly protein complex 1 sigma-1A small chain) (Clathrin coat assembly protein AP19) (Golgi adaptor HAI/AP1 adaptin sigma-1A subunit) (HAI 19 kDa subunit) | 19 kDa  | 0.11  | 9  | 7  | 2  | 2  | 2 | 2  | 1  | 1 | 1 | 0 | 0  | - | 0% (0.12)    |

|                      |              |          |        |                                                                                                                                                          |         |        |    |    |    |    |    |    |   |   |   |   |   |  |   |     |
|----------------------|--------------|----------|--------|----------------------------------------------------------------------------------------------------------------------------------------------------------|---------|--------|----|----|----|----|----|----|---|---|---|---|---|--|---|-----|
|                      |              |          |        | (Sigma 1a subunit of AP-1 clathrin) (Sigma-adaptin 1A) (Sigma1A-adaptin)                                                                                 |         |        |    |    |    |    |    |    |   |   |   |   |   |  |   |     |
| RRAGA_HUMAN          | BAX_HUMAN    | BAX      | Q07812 | Apoptosis regulator BAX (Bcl-2-like protein 4) (Bcl2-L-4)                                                                                                | 21 kDa  | 0.083  | 9  | 7  | 2  | 2  | 0  | 0  | 5 | 0 | 1 | 1 | 0 |  | - | 0%  |
| SNTB1_HUMAN          | B4DND4_HUMAN |          | B4DND4 | cDNA FLJ50588, highly similar to Gamma-glutamyltransferase 5 (EC 2.3.2.2)                                                                                | 54 kDa  | 0.08   | 9  | 7  | 2  | 0  | 4  | 3  | 0 | 0 | 0 | 2 | 0 |  | - | 0%  |
| B2R5R5_HUMAN (+4)    | E9PIM6_HUMAN | THY1     | E9PIM6 | Thy-1 membrane glycoprotein (Fragment)                                                                                                                   | 17 kDa  | 0.086  | 9  | 7  | 2  | 7  | 0  | 0  | 0 | 0 | 0 | 0 | 2 |  | - | 0%  |
| SIA4A_HUMAN          | B3AT_HUMAN   | SLC4A1   | P02730 | Band 3 anion transport protein (Anion exchange protein 1) (AE 1) (Anion exchanger 1) (Solute carrier family 4 member 1) (CD antigen CD253)               | 102 kDa | 0.076  | 87 | 63 | 24 | 3  | 27 | 26 | 7 | 5 | 2 | 9 | 8 |  | - | 95% |
| HD_HUMAN             | E7EVP7_HUMAN | ITPR1    | E7EVP7 | Inositol 1,4,5-trisphosphate receptor type 1                                                                                                             | 312 kDa | 0.0083 | 34 | 25 | 9  | 14 | 4  | 7  | 0 | 1 | 0 | 1 | 7 |  | - | 95% |
| B3KNI8_HUMAN         | GOGA4_HUMAN  | GOLGA4   | Q13439 | Golgin subfamily A member 4 (256 kDa golgin) (Golgin-245) (Protein 72.1) (Trans-Golgi p230)                                                              | 261 kDa | 0.053  | 2  | 2  | 0  | 0  | 1  | 1  | 0 | 0 | 0 | 0 | 0 |  | - | 0%  |
| B4DVV7_HUMAN AN (+1) | DOCK2_HUMAN  | DOCK2    | Q92608 | Dedicator of cytokinesis protein 2                                                                                                                       | 212 kDa | 0.04   | 2  | 2  | 0  | 0  | 1  | 1  | 0 | 0 | 0 | 0 | 0 |  | - | 0%  |
| B5TY32_HUMAN N (+2)  | CDR2L_HUMAN  | CDR2L    | Q86X02 | Cerebellar degeneration-related protein 2-like (Paraneoplastic 62 kDa antigen)                                                                           | 53 kDa  | 0.09   | 2  | 2  | 0  | 0  | 0  | 2  | 0 | 0 | 0 | 0 | 0 |  | - | 0%  |
| ODR4_HUMAN           | RAI14_HUMAN  | RAI14    | Q9P0K7 | Ankyrin (Ankyrin repeat and coiled-coil structure-containing protein) (Novel retinal pigment epithelial cell protein) (Retinoic acid-induced protein 14) | 110 kDa | 0.086  | 2  | 2  | 0  | 1  | 0  | 1  | 0 | 0 | 0 | 0 | 0 |  | - | 0%  |
| RB27B_HUMAN          | AFAP1_HUMAN  | AFAP1    | Q8N556 | Actin filament-associated protein 1 (110 kDa actin filament-associated protein) (AFAP-110)                                                               | 81 kDa  | 0.27   | 2  | 2  | 0  | 0  | 0  | 2  | 0 | 0 | 0 | 0 | 0 |  | - | 0%  |
| A8K4T2_HUMAN N (+1)  | PKD2_HUMAN   | PKD2     | Q13563 | Polycystin-2 (Autosomal dominant polycystic kidney disease type II protein) (Polycystic kidney disease 2 protein) (Polycystin) (R48321)                  | 110 kDa | 0.074  | 2  | 2  | 0  | 2  | 0  | 0  | 0 | 0 | 0 | 0 | 0 |  | - | 0%  |
| Q53HE3_HUMAN N (+1)  | A6H8W6_HUMAN | SIPA1L1  | A6H8W6 | SIPA1L1 protein                                                                                                                                          | 200 kDa | 0.12   | 2  | 2  | 0  | 0  | 1  | 1  | 0 | 0 | 0 | 0 | 0 |  | - | 0%  |
| B2R6E2_HUMAN N (+2)  | RGPA2_HUMAN  | RALGAPA2 | Q2PPJ7 | Ral GTPase-activating protein subunit alpha-2 (250 kDa substrate of Akt) (AS250) (p220)                                                                  | 211 kDa | 0.1    | 2  | 2  | 0  | 2  | 0  | 0  | 0 | 0 | 0 | 0 | 0 |  | - | 0%  |
| B2R9X3_HUMAN N (+1)  | SSFA2_HUMAN  | SSFA2    | P28290 | Sperm-specific antigen 2 (Cleavage signal-1 protein) (CS-1) (Ki-ras-induced actin-interacting protein)                                                   | 138 kDa | 0.067  | 2  | 2  | 0  | 2  | 0  | 0  | 0 | 0 | 0 | 0 | 0 |  | - | 0%  |
| E9PKF6_HUMAN N (+3)  | B4DI03_HUMAN | SEC11L3  | B4DI03 | SEC11-like 3 ( <i>S. cerevisiae</i> ), isoform CRA_a (cDNA FLJ57851, highly similar to Microsomal signal peptidase 21 kDa subunit (EC 3.4.-.-))          | 17 kDa  | 0.045  | 2  | 2  | 0  | 2  | 1  | 0  | 0 | 0 | 0 | 0 | 0 |  | - | 0%  |
| E7ESL0_HUMAN N (+2)  | B5TY32_HUMAN | MAPK14   | B5TY32 | Mitogen-activated protein kinase 14 isoform 4                                                                                                            | 29 kDa  | 0.11   | 3  | 2  | 0  | 0  | 1  | 0  | 2 | 0 | 0 | 0 | 0 |  | - | 0%  |
| B4DZK0_HUMAN         | J3KNA0_HUMAN | OXA1L    | J3KNA0 | Mitochondrial inner membrane protein OXA1L                                                                                                               | 55 kDa  | 0.086  | 2  | 2  | 0  | 0  | 0  | 0  | 2 | 0 | 0 | 0 | 0 |  | - | 0%  |
| A8KAM9_HUMAN AN (+2) | VAV2_HUMAN   | VAV2     | P52735 | Guanine nucleotide exchange factor VAV2 (VAV-2)                                                                                                          | 101 kDa | 0.096  | 2  | 2  | 0  | 0  | 1  | 1  | 0 | 0 | 0 | 0 | 0 |  | - | 0%  |
| OSBL3_HUMAN          | B7Z1V3_HUMAN |          | B7Z1V3 | cDNA FLJ54733, highly similar to General transcription factor 3C polypeptide 5                                                                           | 46 kDa  | 0.065  | 2  | 2  | 0  | 0  | 0  | 0  | 2 | 0 | 0 | 0 | 0 |  | - | 0%  |

|                   |              |          |        |                                                                                                                                                                                                                                                                 |         |       |   |   |   |   |   |   |   |   |   |   |   |   |             |           |
|-------------------|--------------|----------|--------|-----------------------------------------------------------------------------------------------------------------------------------------------------------------------------------------------------------------------------------------------------------------|---------|-------|---|---|---|---|---|---|---|---|---|---|---|---|-------------|-----------|
| IF44L_HUMAN       | F5H2X3_HUMAN | NRP2     | F5H2X3 | Neuropilin-2                                                                                                                                                                                                                                                    | 102 kDa | 0.11  | 2 | 2 | 0 | 0 | 1 | 1 | 0 | 0 | 0 | 0 | 0 | 0 | 2.322302773 | 0% (0.28) |
| B7Z7Y3_HUMAN (+1) | TIG1_HUMAN   | RARRES1  | P49788 | Retinoic acid receptor responder protein 1 (RAR-responsive protein TIG1) (Tazarotene-induced gene 1 protein)                                                                                                                                                    | 33 kDa  | 0.06  | 2 | 2 | 0 | 0 | 2 | 0 | 0 | 0 | 0 | 0 | 0 | 0 | 2.322302773 | 0% (0.28) |
| B2R880_HUMAN (+1) | NCKPL_HUMAN  | NCKAP1L  | P55160 | Nck-associated protein 1-like (Hematopoietic protein 1) (Membrane-associated protein HEM-1)                                                                                                                                                                     | 128 kDa | 0.083 | 2 | 2 | 0 | 0 | 2 | 0 | 0 | 0 | 0 | 0 | 0 | 0 | 2.322302773 | 0% (0.28) |
| CH142_HUMAN       | GPAT4_HUMAN  | AGPAT6   | Q86UL3 | Glycerol-3-phosphate acyltransferase 4 (GPAT4) (EC 2.3.1.15) (1-acylglycerol-3-phosphate O-acyltransferase 6) (1-AGP acyltransferase 6) (1-AGPAT 6) (Acyl-CoA:glycerol-3-phosphate acyltransferase 4) (Lysophosphatidic acid acyltransferase zeta) (LPAAT-zeta) | 52 kDa  | 0.15  | 2 | 2 | 0 | 2 | 0 | 0 | 0 | 0 | 0 | 0 | 0 | 0 | 2.322302773 | 0% (0.28) |
| B2RAW1_HUMAN (+1) | G3V3Y1_HUMAN |          | G3V3Y1 | Uncharacterized protein                                                                                                                                                                                                                                         | 32 kDa  | 0.018 | 2 | 2 | 0 | 0 | 0 | 0 | 2 | 0 | 0 | 0 | 0 | 0 | 2.322302773 | 0% (0.28) |
| BYST_HUMAN        | E9PHI6_HUMAN | DYNC1LI1 | E9PHI6 | Cytoplasmic dynein 1 light intermediate chain 1                                                                                                                                                                                                                 | 43 kDa  | 0.053 | 2 | 2 | 0 | 0 | 0 | 1 | 1 | 0 | 0 | 0 | 0 | 0 | 2.322302773 | 0% (0.28) |
| SRPK2_HUMAN       | PAR6B_HUMAN  | PAR6B    | Q9BYG5 | Partitioning defective 6 homolog beta (PAR-6 beta)                                                                                                                                                                                                              | 41 kDa  | 0.044 | 2 | 2 | 0 | 0 | 0 | 1 | 1 | 0 | 0 | 0 | 0 | 0 | 2.322302773 | 0% (0.28) |
| E9PN70_HUMAN (+1) | E7EQU1_HUMAN | HMGB3    | E7EQU1 | High mobility group protein B3 (Fragment)                                                                                                                                                                                                                       | 22 kDa  | 0.14  | 2 | 2 | 0 | 1 | 0 | 0 | 1 | 0 | 0 | 0 | 0 | 0 | 2.322302773 | 0% (0.28) |
| GNP11_HUMAN       | ETUD1_HUMAN  | EFTUD1   | Q7Z2Z2 | Elongation factor Tu GTP-binding domain-containing protein 1 (Elongation factor-like 1) (Protein FAM42A)                                                                                                                                                        | 125 kDa | 0.14  | 2 | 2 | 0 | 0 | 0 | 0 | 2 | 0 | 0 | 0 | 0 | 0 | 2.322302773 | 0% (0.28) |
| B1ALJ9_HUMAN      | CBL_HUMAN    | CBL      | P22681 | E3 ubiquitin-protein ligase CBL (EC 6.3.2.-) (Casitas B-lineage lymphoma proto-oncogene) (Proto-oncogene c-Cbl) (RING finger protein 55) (Signal transduction protein CBL)                                                                                      | 100 kDa | 0.089 | 2 | 2 | 0 | 0 | 1 | 2 | 0 | 0 | 0 | 0 | 0 | 0 | 2.322302773 | 0% (0.28) |
| B4E2I4_HUMAN (+1) | B7Z6C9_HUMAN |          | B7Z6C9 | cDNA FLJ61658, highly similar to Transmembrane 9 superfamily protein member 1                                                                                                                                                                                   | 92 kDa  | 0.05  | 2 | 2 | 0 | 0 | 1 | 1 | 0 | 0 | 0 | 0 | 0 | 0 | 2.322302773 | 0% (0.28) |
| IKIP_HUMAN        | ATLA1_HUMAN  | ATL1     | Q8WXF7 | Atlastin-1 (EC 3.6.5.-) (Brain-specific GTP-binding protein) (GTP-binding protein 3) (GBP-3) (hGBP3) (Guanine nucleotide-binding protein 3) (Spastic paraplegia 3 protein A)                                                                                    | 64 kDa  | 0.071 | 2 | 2 | 0 | 2 | 0 | 0 | 0 | 0 | 0 | 0 | 0 | 0 | 2.322302773 | 0% (0.28) |
| ADCK3_HUMAN (+4)  | A8K2S1_HUMAN |          | A8K2S1 | cDNA FLJ75258, highly similar to Homo sapiens phospholipase A2, group IVA (cytosolic, calcium-dependent) (PLA2G4A), mRNA                                                                                                                                        | 85 kDa  | 0.04  | 2 | 2 | 0 | 0 | 2 | 0 | 0 | 0 | 0 | 0 | 0 | 0 | 2.322302773 | 0% (0.28) |
| PAG15_HUMAN       | SSH3_HUMAN   | SSH3     | Q8TE77 | Protein phosphatase Slingshot homolog 3 (EC 3.1.3.16) (EC 3.1.3.48) (SSH-like protein 3) (SSH-3L) (SSH-3L)                                                                                                                                                      | 73 kDa  | 0.061 | 2 | 2 | 0 | 0 | 0 | 0 | 2 | 0 | 0 | 0 | 0 | 0 | 2.322302773 | 0% (0.28) |
| VP33B_HUMAN       | D6REB4_HUMAN | PAIP1    | D6REB4 | Polyadenylate-binding protein-interacting protein 1 (Uncharacterized protein)                                                                                                                                                                                   | 40 kDa  | 0.044 | 2 | 2 | 0 | 0 | 1 | 1 | 0 | 0 | 0 | 0 | 0 | 0 | 2.322302773 | 0% (0.28) |
| GHDC_HUMAN (+1)   | G3ST2_HUMAN  | GAL3ST2  | Q9H3Q3 | Galactose-3-O-sulfotransferase 2 (Gal3ST-2) (EC 2.8.2.-) (Beta-galactose-3-O-sulfotransferase 2) (Gal-beta-1,3-GalNAc 3'-sulfotransferase 2) (Glycoprotein beta-Gal 3'-sulfotransferase 2)                                                                      | 46 kDa  | 0.043 | 2 | 2 | 0 | 1 | 0 | 1 | 0 | 0 | 0 | 0 | 0 | 0 | 2.322302773 | 0% (0.28) |
| A6NIR4_HUMAN (+3) | FGFP1_HUMAN  | FGFBP1   | Q14512 | Fibroblast growth factor-binding protein 1 (FGF-BP) (FGF-BP1) (FGF-binding protein 1) (FGFBP-1) (17 kDa                                                                                                                                                         | 26 kDa  | 0.048 | 2 | 2 | 0 | 0 | 1 | 1 | 0 | 0 | 0 | 0 | 0 | 0 | 2.322302773 | 0% (0.28) |

|                     |              |         |        |                                                                                                                                                                                                                                                        |         |       |    |    |    |    |    |    |    |   |   |   |   |   |   |   |   |   |     |
|---------------------|--------------|---------|--------|--------------------------------------------------------------------------------------------------------------------------------------------------------------------------------------------------------------------------------------------------------|---------|-------|----|----|----|----|----|----|----|---|---|---|---|---|---|---|---|---|-----|
|                     |              |         |        | heparin-binding growth factor-binding protein) (17 kDa HBGF-binding protein) (HBp17)                                                                                                                                                                   |         |       |    |    |    |    |    |    |    |   |   |   |   |   |   |   |   |   |     |
| F8W8C2_HUMAN        | BSPRY_HUMAN  | BSPRY   | Q5W0U4 | B box and SPRY domain-containing protein                                                                                                                                                                                                               | 44 kDa  | 0.033 | 2  | 2  | 0  | 2  | 0  | 0  | 0  | 0 | 0 | 0 | 0 | 0 | 0 | 0 | 0 | - | 0%  |
| PR38B_HUMAN         | B2RAH2_HUMAN |         | B2RAH2 | Sodium/hydrogen exchanger                                                                                                                                                                                                                              | 91 kDa  | 0.046 | 2  | 2  | 0  | 2  | 0  | 0  | 0  | 0 | 0 | 0 | 0 | 0 | 0 | 0 | 0 | - | 0%  |
| B2RAY1_HUMAN (+1)   | A5D8Z7_HUMAN | SIGLEC1 | A5D8Z7 | SIGLEC1 protein (Fragment)                                                                                                                                                                                                                             | 180 kDa | 0.072 | 2  | 2  | 0  | 0  | 0  | 1  | 0  | 0 | 0 | 0 | 0 | 0 | 0 | 0 | 0 | - | 0%  |
| TRM6_HUMAN          | VPS25_HUMAN  | VPS25   | Q9BRG1 | Vacuolar protein-sorting-associated protein 25 (hVps25) (Dermal papilla-derived protein 9) (ELL-associated protein of 20 kDa) (ESCRT-II complex subunit VPS25)                                                                                         | 21 kDa  | 0.054 | 2  | 2  | 0  | 0  | 0  | 0  | 2  | 0 | 0 | 0 | 0 | 0 | 0 | 0 | 0 | - | 0%  |
| A6PVN5_HUMAN N (+1) | G3V145_HUMAN | SDR16C5 | G3V145 | Epidermal retinol dehydrogenase 2 (Retinal short chain dehydrogenase reductase isoform 1, isoform CRA_c)                                                                                                                                               | 35 kDa  | 0.07  | 2  | 2  | 0  | 2  | 0  | 0  | 0  | 0 | 0 | 0 | 0 | 0 | 0 | 0 | 0 | - | 0%  |
| H0YBJ4_HUMAN N (+2) | MZB1_HUMAN   | MZB1    | Q8WU39 | Marginal zone B- and B1-cell-specific protein (Mesenteric estrogen-dependent adipose 7) (MEDA-7) (Plasma cell-induced resident endoplasmic reticulum protein) (Plasma cell-induced resident ER protein) (pERp1) (Proapoptotic caspase adapter protein) | 21 kDa  | 0.036 | 2  | 2  | 0  | 0  | 1  | 1  | 0  | 0 | 0 | 0 | 0 | 0 | 0 | 0 | 0 | - | 0%  |
| F208A_HUMAN         | F8WCD0_HUMAN | RNF149  | F8WCD0 | E3 ubiquitin-protein ligase RNF149                                                                                                                                                                                                                     | 43 kDa  | 0.009 | 2  | 2  | 0  | 0  | 1  | 0  | 1  | 0 | 0 | 0 | 0 | 0 | 0 | 0 | 0 | - | 0%  |
| Q59ET0_HUMAN        | B2RE38_HUMAN |         | B2RE38 | cDNA, FLJ96906, highly similar to Homo sapiens solute carrier family 17 (anion/sugar transporter), member 5 (SLC17A5), mRNA                                                                                                                            | 55 kDa  | 0.036 | 2  | 2  | 0  | 2  | 0  | 0  | 0  | 0 | 0 | 0 | 0 | 0 | 0 | 0 | 0 | - | 0%  |
| F263_HUMAN          | C9K0K7_HUMAN | PRPSAP2 | C9K0K7 | Phosphoribosyl pyrophosphate synthase-associated protein 2 (Fragment)                                                                                                                                                                                  | 27 kDa  | 0.017 | 2  | 2  | 0  | 0  | 1  | 1  | 0  | 0 | 0 | 0 | 0 | 0 | 0 | 0 | 0 | - | 0%  |
| B4DRD3_HUMAN (+2)   | CDS1_HUMAN   | CDS1    | Q92903 | Phosphatidate cytidyltransferase 1 (EC 2.7.7.41) (CDP-DAG synthase 1) (CDP-DG synthase 1) (CDP-diacylglycerol synthase 1) (CDS 1) (CDP-diglyceride pyrophosphorylase 1) (CDP-diglyceride synthase 1) (CTP:phosphatidate cytidyltransferase 1)          | 53 kDa  | 0.048 | 2  | 2  | 0  | 2  | 0  | 0  | 0  | 0 | 0 | 0 | 0 | 0 | 0 | 0 | 0 | - | 0%  |
| TM260_HUMAN         | TP4A2_HUMAN  | PTP4A2  | Q12974 | Protein tyrosine phosphatase type IVA 2 (EC 3.1.3.48) (HU-PP-1) (OV-1) (PTP/CAAXII) (Protein-tyrosine phosphatase 4a2) (Protein-tyrosine phosphatase of regenerating liver 2) (PRL-2)                                                                  | 19 kDa  | 0.045 | 2  | 2  | 0  | 1  | 1  | 0  | 0  | 0 | 0 | 0 | 0 | 0 | 0 | 0 | 0 | - | 0%  |
| J3KNA0_HUMAN N (+2) | B4DKQ5_HUMAN |         | B4DKQ5 | cDNA FLJ54710, highly similar to Target of Myb protein 1                                                                                                                                                                                               | 55 kDa  | 0.044 | 21 | 15 | 5  | 7  | 3  | 5  | 0  | 0 | 1 | 1 | 3 | 0 | 0 | 0 | 0 | - | 95% |
| PTPRK_HUMAN         | E3SWK8_HUMAN | HLA-C   | E3SWK8 | MHC class I antigen (Fragment)                                                                                                                                                                                                                         | 21 kDa  | 0.019 | 38 | 28 | 10 | 0  | 8  | 0  | 12 | 0 | 0 | 4 | 0 | 0 | 0 | 0 | 0 | - | 95% |
| FN3K_HUMAN          | CD82_HUMAN   | CD82    | P27701 | CD82 antigen (C33 antigen) (IA4) (Inducible membrane protein R2) (Metastasis suppressor Kangai-1) (Suppressor of tumorigenicity 6 protein) (Tetraspanin-27) (Tspan-27) (CD antigen CD82)                                                               | 30 kDa  | 0.1   | 60 | 44 | 16 | 13 | 12 | 15 | 4  | 5 | 1 | 5 | 5 | 0 | 0 | 0 | 0 | - | 95% |
| B3KUJ0_HUMAN N (+2) | B3KX23_HUMAN |         | B3KX23 | cDNA FLJ44516 fis, clone UTERU3002600, highly similar to Homo sapiens                                                                                                                                                                                  | 73 kDa  | 0.073 | 13 | 10 | 3  | 1  | 4  | 2  | 3  | 0 | 0 | 0 | 0 | 0 | 0 | 0 | 0 | - | 0%  |

|                   |              |         |        |  |                                                                                                                                                                                                                                                                                                                                                       |         |       |    |    |    |    |    |   |    |   |   |   |   |   |             |              |
|-------------------|--------------|---------|--------|--|-------------------------------------------------------------------------------------------------------------------------------------------------------------------------------------------------------------------------------------------------------------------------------------------------------------------------------------------------------|---------|-------|----|----|----|----|----|---|----|---|---|---|---|---|-------------|--------------|
|                   |              |         |        |  | DEAD (Asp-Glu-Ala-Asp) box polypeptide 42 (DDX42), transcript variant 2, mRNA                                                                                                                                                                                                                                                                         |         |       |    |    |    |    |    |   |    |   |   |   |   |   |             |              |
| A8MVT4_HUMAN (+1) | OAS2_HUMAN   | OAS2    | P29728 |  | 2'-5'-oligoadenylate synthase 2 ((2-5')oligo(A) synthase 2) (2-5A synthase 2) (EC 2.7.7.84) (p69 OAS / p71 OAS) (p69OAS / p71OAS)                                                                                                                                                                                                                     | 82 kDa  | 0.14  | 28 | 21 | 7  | 0  | 2  | 2 | 17 | 0 | 7 | 0 | 0 | 0 | 2.409261043 | 95% (0.014)  |
| GEMI4_HUMAN (+4)  | DPYL2_HUMAN  | DPYSL2  | Q16555 |  | Dihydropyrimidinase-related protein 2 (DRP-2) (Collapsin response mediator protein 2) (CRMP-2) (N2A3) (Unc-33-like phosphoprotein 2) (ULIP-2)                                                                                                                                                                                                         | 62 kDa  | 0.014 | 28 | 21 | 7  | 2  | 11 | 8 | 0  | 0 | 2 | 2 | 0 | 0 | 2.409261043 | 95% (0.014)  |
| UB2J1_HUMAN       | TOR1B_HUMAN  | TOR1B   | O14657 |  | Torsin-1B (Torsin family 1 member B)                                                                                                                                                                                                                                                                                                                  | 38 kDa  | 0.063 | 17 | 13 | 4  | 0  | 2  | 2 | 9  | 0 | 1 | 0 | 3 | 0 | 2.424585187 | 95% (0.042)  |
| B4DFR2_HUMAN      | ABHEB_HUMAN  | ABHD14B | Q961U4 |  | Alpha/beta hydrolase domain-containing protein 14B (Abhydrolase domain-containing protein 14B) (EC 3.-.-.-) (CCG1-interacting factor B)                                                                                                                                                                                                               | 22 kDa  | 0.23  | 17 | 13 | 4  | 2  | 3  | 3 | 5  | 0 | 3 | 1 | 0 | 0 | 2.424585187 | 95% (0.042)  |
| B7Z4A7_HUMAN (+5) | AP2M1_HUMAN  | AP2M1   | Q96CW1 |  | AP-2 complex subunit mu (AP-2 mu chain) (Adapter-related protein complex 2 subunit mu) (Adaplin-mu2) (Adaptor protein complex AP-2 subunit mu) (Clathrin assembly protein complex 2 mu medium chain) (Clathrin coat assembly protein AP50) (Clathrin coat-associated protein AP50) (HA2 50 kDa subunit) (Plasma membrane adaptor AP-2 50 kDa protein) | 50 kDa  | 0.065 | 42 | 32 | 11 | 10 | 9  | 5 | 9  | 3 | 1 | 3 | 4 | 0 | 2.424933084 | 95% (0.0032) |
| B2R6Q2_HUMAN (+2) | PLMN_HUMAN   | PLG     | P00747 |  | Plasminogen (EC 3.4.21.7) [Cleaved into: Plasmin heavy chain A; Activation peptide; Angiostatin; Plasmin heavy chain A, short form; Plasmin light chain B]                                                                                                                                                                                            | 91 kDa  | 0.04  | 6  | 5  | 1  | 0  | 1  | 0 | 4  | 1 | 0 | 0 | 0 | 0 | 2.481152651 | 0% (0.14)    |
| A8K559_HUMAN (+1) | Q5JW30_HUMAN | STAU1   | Q5JW30 |  | Double-stranded RNA-binding protein Staufen homolog 1                                                                                                                                                                                                                                                                                                 | 55 kDa  | 0.064 | 6  | 5  | 1  | 0  | 3  | 2 | 0  | 0 | 0 | 1 | 0 | 0 | 2.481152651 | 0% (0.14)    |
| PLAP_HUMAN        | A8MQB8_HUMAN | FMR1    | A8MQB8 |  | Fragile X mental retardation protein 1                                                                                                                                                                                                                                                                                                                | 66 kDa  | 0.082 | 6  | 5  | 1  | 1  | 1  | 0 | 3  | 1 | 0 | 0 | 0 | 0 | 2.481152651 | 0% (0.14)    |
| ADHX_HUMAN (+2)   | 68MP_HUMAN   | MP68    | P56378 |  | 6.8 kDa mitochondrial protolipid                                                                                                                                                                                                                                                                                                                      | 7 kDa   | 0.11  | 6  | 5  | 1  | 2  | 1  | 1 | 1  | 0 | 1 | 0 | 0 | 0 | 2.481152651 | 0% (0.14)    |
| Q52NV4_HUMAN (+1) | G3XAI2_HUMAN | LAMB1   | G3XAI2 |  | Laminin subunit beta-1 (Laminin, beta 1, isoform CRA_a)                                                                                                                                                                                                                                                                                               | 200 kDa | 0.12  | 6  | 5  | 1  | 1  | 2  | 2 | 0  | 0 | 0 | 1 | 0 | 0 | 2.481152651 | 0% (0.14)    |
| AURKA_HUMAN (+2)  | B3KSR7_HUMAN |         | B3KSR7 |  | cDNA FLJ36831 fis, clone ASTRO2010615, highly similar to Calpain-5 (EC 3.4.22.-)                                                                                                                                                                                                                                                                      | 64 kDa  | 0.11  | 6  | 5  | 1  | 4  | 1  | 0 | 0  | 0 | 1 | 0 | 0 | 0 | 2.481152651 | 0% (0.14)    |
| F6IQV5_HUMAN      | A8K693_HUMAN |         | A8K693 |  | cDNA FLJ75713, highly similar to Homo sapiens kynurenine 3-monooxygenase (kynurenine 3-hydroxylase) (KMO), mRNA                                                                                                                                                                                                                                       | 56 kDa  | 0.37  | 6  | 5  | 1  | 0  | 4  | 2 | 0  | 0 | 0 | 0 | 1 | 0 | 2.481152651 | 0% (0.14)    |
| M4QNU4_HUMAN      | F5H5M9_HUMAN | TNIK    | F5H5M9 |  | TRAF2 and NCK-interacting protein kinase                                                                                                                                                                                                                                                                                                              | 150 kDa | 0.46  | 6  | 5  | 1  | 2  | 1  | 1 | 0  | 0 | 0 | 0 | 1 | 0 | 2.481152651 | 0% (0.14)    |
| B4DZX1_HUMAN (+1) | H7C417_HUMAN |         | H7C417 |  | Uncharacterized protein (Fragment)                                                                                                                                                                                                                                                                                                                    | 37 kDa  | 0.023 | 6  | 5  | 1  | 1  | 1  | 1 | 2  | 1 | 0 | 0 | 0 | 0 | 2.481152651 | 0% (0.14)    |
| DPOD1_HUMAN (+2)  | B4DVY1_HUMAN | EIF3D   | B4DVY1 |  | Eukaryotic translation initiation factor 3 subunit D (eIF3d) (Eukaryotic translation initiation factor 3 subunit 7) (eIF-3-zeta)                                                                                                                                                                                                                      | 58 kDa  | 0.022 | 6  | 5  | 1  | 0  | 0  | 3 | 2  | 0 | 1 | 0 | 0 | 0 | 2.481152651 | 0% (0.14)    |
| B2R745_HUMAN      | RASM_HUMAN   | MRAS    | O14807 |  | Ras-related protein M-Ras (Ras-related protein R-Ras3)                                                                                                                                                                                                                                                                                                | 24 kDa  | 0.051 | 6  | 5  | 1  | 0  | 2  | 2 | 0  | 0 | 0 | 0 | 2 | 0 | 2.481152651 | 0% (0.14)    |

|                   |              |         |        |                                                                                                                                                                                                                                                                                                                      |         |       |     |     |    |    |    |    |    |   |   |    |    |   |                 |
|-------------------|--------------|---------|--------|----------------------------------------------------------------------------------------------------------------------------------------------------------------------------------------------------------------------------------------------------------------------------------------------------------------------|---------|-------|-----|-----|----|----|----|----|----|---|---|----|----|---|-----------------|
| SYUG_HUMAN        | M0QYZ2_HUMAN | AP2S1   | M0QYZ2 | AP-2 complex subunit sigma                                                                                                                                                                                                                                                                                           | 19 kDa  | 0.12  | 6   | 5   | 1  | 0  | 0  | 2  | 3  | 0 | 0 | 1  | 0  | - | 0% (0.14)       |
| KIF1A_HUMAN       | A2ACR1_HUMAN | PSMB9   | A2ACR1 | Proteasome subunit beta type (EC 3.4.25.1)                                                                                                                                                                                                                                                                           | 21 kDa  | 0.012 | 6   | 5   | 1  | 0  | 1  | 2  | 2  | 0 | 0 | 1  | 0  | - | 0% (0.14)       |
| A8K8C2_HUMAN (+2) | F210B_HUMAN  | FAM210B | Q96KR6 | Protein FAM210B                                                                                                                                                                                                                                                                                                      | 20 kDa  | 0.055 | 6   | 5   | 1  | 2  | 2  | 0  | 1  | 0 | 1 | 0  | 0  | - | 0% (0.14)       |
| RAB7B_HUMAN       | RPP30_HUMAN  | RPP30   | P78346 | Ribonuclease P protein subunit p30 (RNaseP protein p30) (EC 3.1.26.5) (RNase P subunit 2)                                                                                                                                                                                                                            | 29 kDa  | 0.2   | 7   | 5   | 1  | 0  | 1  | 1  | 4  | 0 | 0 | 1  | 0  | - | 0% (0.14)       |
| Q658W7_HUMAN      | Q4G1C4_HUMAN | ZADH2   | Q4G1C4 | ZADH2 protein (Fragment)                                                                                                                                                                                                                                                                                             | 39 kDa  | 0.037 | 6   | 5   | 1  | 1  | 1  | 1  | 2  | 1 | 0 | 0  | 0  | - | 0% (0.14)       |
| IGHM_HUMAN (+1)   | RPB7_HUMAN   | POLR2G  | P62487 | DNA-directed RNA polymerase II subunit RPB7 (RNA polymerase II subunit B7) (DNA-directed RNA polymerase II subunit G) (RNA polymerase II 19 kDa subunit) (RPB19)                                                                                                                                                     | 19 kDa  | 0.066 | 6   | 5   | 1  | 0  | 3  | 1  | 1  | 0 | 0 | 1  | 0  | - | 0% (0.14)       |
| H3BRY5_HUMAN (+1) | B2R6E2_HUMAN |         | B2R6E2 | cDNA, FLJ92910, highly similar to Homo sapiens programmed cell death 4 (neoplastic transformation inhibitor) (PDCD4), transcript variant 1, mRNA                                                                                                                                                                     | 52 kDa  | 0.14  | 6   | 5   | 1  | 0  | 0  | 0  | 5  | 1 | 0 | 0  | 0  | - | 0% (0.14)       |
| D6RDJ3_HUMAN (+3) | RASL1_HUMAN  | RASAL1  | O95294 | RasGAP-activating-like protein 1                                                                                                                                                                                                                                                                                     | 90 kDa  | 0.23  | 25  | 19  | 6  | 19 | 0  | 0  | 0  | 0 | 0 | 0  | 6  | - | 95% (0.016)     |
| B3KUB8_HUMAN (+7) | B4DGM9_HUMAN | TOR1A   | B4DGM9 | Torsin family 1, member A (Torsin A), isoform CRA_a (cDNA FLJ56343, highly similar to Torsin A)                                                                                                                                                                                                                      | 41 kDa  | 0.055 | 44  | 33  | 11 | 8  | 8  | 4  | 14 | 0 | 4 | 3  | 4  | - | 95% (0.0022)    |
| ISOC1_HUMAN       | SNTD_HUMAN   | NT5E    | P21589 | 5'-nucleotidase (5'-NT) (EC 3.1.3.5) (Ecto-5'-nucleotidase) (CD antigen CD73)                                                                                                                                                                                                                                        | 63 kDa  | 0.13  | 29  | 22  | 7  | 7  | 9  | 7  | 0  | 0 | 3 | 2  | 2  | - | 95% (0.0098)    |
| F8WBK5_HUMAN (+1) | S10A8_HUMAN  | S10A8   | P05109 | Protein S100-A8 (Calgranulin-A) (Calprotectin L1L subunit) (Cystic fibrosis antigen) (CFAG) (Leukocyte L1 complex light chain) (Migration inhibitory factor-related protein 8) (MRP-8) (p8) (S100 calcium-binding protein A8) (Urinary stone protein band A) [Cleaved into: Protein S100-A8, N-terminally processed] | 11 kDa  | 0.15  | 71  | 53  | 18 | 1  | 22 | 20 | 10 | 0 | 5 | 5  | 8  | - | 95% (0.00014)   |
| ERD21_HUMAN       | ITPR3_HUMAN  | ITPR3   | Q14573 | Inositol 1,4,5-trisphosphate receptor type 3 (IP3 receptor isoform 3) (IP3R 3) (InsP3R3) (Type 3 inositol 1,4,5-trisphosphate receptor) (Type 3 InsP3 receptor)                                                                                                                                                      | 304 kDa | 0.1   | 185 | 138 | 48 | 85 | 21 | 29 | 5  | 6 | 0 | 32 | 10 | - | 95% (< 0.00010) |
| VPS29_HUMAN       | A8K964_HUMAN |         | A8K964 | cDNA FLJ75071, highly similar to Homo sapiens pinin, desmosome associated protein (PNN), mRNA                                                                                                                                                                                                                        | 82 kDa  | 0.2   | 10  | 8   | 2  | 1  | 1  | 3  | 3  | 0 | 0 | 1  | 1  | - | 0% (0.078)      |
| B3KN09_HUMAN (+1) | FIBB_HUMAN   | FGB     | P02675 | Fibrinogen beta chain [Cleaved into: Fibrinopeptide B; Fibrinogen beta chain]                                                                                                                                                                                                                                        | 56 kDa  | 0.076 | 10  | 8   | 2  | 0  | 0  | 0  | 8  | 0 | 0 | 1  | 1  | - | 0% (0.078)      |
| EDC3_HUMAN        | PSA2_HUMAN   | PSMA2   | P25787 | Proteasome subunit alpha type-2 (EC 3.4.25.1) (Macropain subunit C3) (Multicatalytic endopeptidase complex subunit C3) (Proteasome component C3)                                                                                                                                                                     | 26 kDa  | 0.061 | 10  | 8   | 2  | 0  | 2  | 2  | 4  | 0 | 1 | 2  | 0  | - | 0% (0.078)      |
| B2R8N1_HUMAN (+2) | NCKP1_HUMAN  | NCKAP1  | Q9Y2A7 | Nck-associated protein 1 (NAP1) (Membrane-associated protein HEM-2) (p125Nap1)                                                                                                                                                                                                                                       | 129 kDa | 0.14  | 37  | 28  | 9  | 11 | 5  | 6  | 5  | 2 | 3 | 1  | 2  | - | 95% (0.0038)    |
| A8K6B4_HUMAN (+3) | B2R4C1_HUMAN |         | B2R4C1 | cDNA, FLJ92036, highly similar to Homo sapiens ribosomal protein L31 (RPL31), mRNA                                                                                                                                                                                                                                   | 14 kDa  | 0.12  | 14  | 11  | 3  | 2  | 3  | 2  | 4  | 1 | 1 | 0  | 1  | - | 95% (0.046)     |
| GBRL2_HUMAN (+1)  | AN32A_HUMAN  | ANP32A  | P39687 | Acidic leucine-rich nuclear phosphoprotein 32 family member A (Acidic nuclear                                                                                                                                                                                                                                        | 29 kDa  | 0.2   | 14  | 11  | 3  | 1  | 3  | 1  | 7  | 1 | 0 | 2  | 0  | - | 95% (0.046)     |

|                   |              |        |        |                                                                                                                                                                                                                                                                                                                                |         |        |    |    |    |    |    |    |    |   |   |   |   |             |          |
|-------------------|--------------|--------|--------|--------------------------------------------------------------------------------------------------------------------------------------------------------------------------------------------------------------------------------------------------------------------------------------------------------------------------------|---------|--------|----|----|----|----|----|----|----|---|---|---|---|-------------|----------|
|                   |              |        |        | phosphoprotein pp32)<br>(Leucine-rich acidic nuclear protein) (LANP)<br>(Mapmodulin) (Potent heat-stable protein phosphatase 2A inhibitor 11PP2A) (Putative HLA-DR-associated protein 1) (PHAPI)                                                                                                                               |         |        |    |    |    |    |    |    |    |   |   |   |   |             |          |
| SYPM_HUMAN        | ARL8A_HUMAN  | ARL8A  | Q96BM9 | ADP-ribosylation factor-like protein 8A (ADP-ribosylation factor-like protein 10B) (Novel small G protein indispensable for equal chromosome segregation 2)                                                                                                                                                                    | 21 kDa  | 0.061  | 53 | 40 | 13 | 14 | 10 | 8  | 8  | 0 | 4 | 3 | 6 | -           | 95%      |
|                   |              |        |        |                                                                                                                                                                                                                                                                                                                                |         |        |    |    |    |    |    |    |    |   |   |   |   | 2.586338998 | (0.0063) |
| A8KAL2_HUMAN (+2) | A8K217_HUMAN |        | A8K217 | cDNA FLJ76072, highly similar to Homo sapiens GIPC PDZ domain containing family, member 1 (GIPC1), transcript variant 1, mRNA                                                                                                                                                                                                  | 36 kDa  | 0.041  | 18 | 14 | 4  | 4  | 1  | 1  | 8  | 2 | 0 | 0 | 2 | -           | 95%      |
|                   |              |        |        |                                                                                                                                                                                                                                                                                                                                |         |        |    |    |    |    |    |    |    |   |   |   |   | 2.594764859 | (0.028)  |
| B4DZ28_HUMAN (+1) | EXOS2_HUMAN  | EXOSC2 | Q13868 | Exosome complex component RRP4 (Exosome component 2) (Ribosomal RNA-processing protein 4)                                                                                                                                                                                                                                      | 33 kDa  | 0.061  | 18 | 14 | 4  | 0  | 4  | 4  | 6  | 1 | 1 | 2 | 0 | -           | 95%      |
|                   |              |        |        |                                                                                                                                                                                                                                                                                                                                |         |        |    |    |    |    |    |    |    |   |   |   |   | 2.594764859 | (0.028)  |
| GDPD1_HUMAN       | AGO2_HUMAN   | AGO2   | Q9UKV8 | Protein argonaute-2 (Argonaute2) (hAgo2) (EC 3.1.26.n2) (Argonaute RISC catalytic component 2) (Eukaryotic translation initiation factor 2C 2) (eIF-2C 2) (eIF2C 2) (PAZ Piwi domain protein) (PPD) (Protein slicer)                                                                                                           | 97 kDa  | 0.1    | 18 | 14 | 4  | 0  | 6  | 8  | 1  | 1 | 0 | 2 | 1 | -           | 95%      |
|                   |              |        |        |                                                                                                                                                                                                                                                                                                                                |         |        |    |    |    |    |    |    |    |   |   |   |   | 2.594764859 | (0.028)  |
| PLXB1_HUMAN       | EHD1_HUMAN   | EHD1   | Q9H4M9 | EH domain-containing protein 1 (PAST homolog 1) (hPAST1) (Testilin)                                                                                                                                                                                                                                                            | 61 kDa  | 0.02   | 18 | 14 | 4  | 5  | 4  | 1  | 4  | 0 | 2 | 2 | 0 | -           | 95%      |
|                   |              |        |        |                                                                                                                                                                                                                                                                                                                                |         |        |    |    |    |    |    |    |    |   |   |   |   | 2.594764859 | (0.028)  |
| APOBR_HUMAN (+1)  | Q0PNF2_HUMAN |        | Q0PNF2 | FEX1                                                                                                                                                                                                                                                                                                                           | 275 kDa | 0.023  | 22 | 17 | 5  | 0  | 7  | 9  | 0  | 0 | 0 | 1 | 4 | -           | 95%      |
|                   |              |        |        |                                                                                                                                                                                                                                                                                                                                |         |        |    |    |    |    |    |    |    |   |   |   |   | 2.608439774 | (0.017)  |
| E3SWK8_HUMAN      | GSHR_HUMAN   | GSR    | P00390 | Glutathione reductase, mitochondrial (GR) (GRase) (EC 1.8.1.7)                                                                                                                                                                                                                                                                 | 56 kDa  | 0.37   | 22 | 17 | 5  | 2  | 7  | 7  | 1  | 1 | 0 | 2 | 2 | -           | 95%      |
|                   |              |        |        |                                                                                                                                                                                                                                                                                                                                |         |        |    |    |    |    |    |    |    |   |   |   |   | 2.608439774 | (0.017)  |
| Q53R32_HUMAN (+1) | STX7_HUMAN   | STX7   | O15400 | Syntaxin-7                                                                                                                                                                                                                                                                                                                     | 30 kDa  | 0.18   | 26 | 20 | 6  | 9  | 4  | 4  | 3  | 0 | 0 | 2 | 4 | -           | 95%      |
|                   |              |        |        |                                                                                                                                                                                                                                                                                                                                |         |        |    |    |    |    |    |    |    |   |   |   |   | 2.618360169 | (0.011)  |
| Q53F88_HUMAN (+1) | HPCL1_HUMAN  | HPCAL1 | P37235 | Hippocalcin-like protein 1 (Calcium-binding protein BDR-1) (HLP2) (Visinin-like protein 3) (VILIP-3)                                                                                                                                                                                                                           | 22 kDa  | 0.078  | 30 | 23 | 7  | 5  | 7  | 9  | 2  | 0 | 1 | 3 | 3 | -           | 95%      |
|                   |              |        |        |                                                                                                                                                                                                                                                                                                                                |         |        |    |    |    |    |    |    |    |   |   |   |   | 2.625891325 | (0.0066) |
| FAKD5_HUMAN       | HMGB1_HUMAN  | HMGB1  | P09429 | High mobility group protein B1 (High mobility group protein 1) (HMG-1)                                                                                                                                                                                                                                                         | 25 kDa  | 0.034  | 38 | 29 | 9  | 8  | 5  | 5  | 11 | 2 | 1 | 1 | 5 | -           | 95%      |
|                   |              |        |        |                                                                                                                                                                                                                                                                                                                                |         |        |    |    |    |    |    |    |    |   |   |   |   | 2.636583085 | (0.0026) |
| B7ZLX5_HUMAN (+1) | A8K274_HUMAN |        | A8K274 | cDNA FLJ78227, highly similar to Homo sapiens pituitary tumor-transforming 1 interacting protein (PTTG1IP), mRNA                                                                                                                                                                                                               | 20 kDa  | 0.0071 | 46 | 35 | 11 | 7  | 9  | 10 | 9  | 6 | 2 | 3 | 0 | -           | 95%      |
|                   |              |        |        |                                                                                                                                                                                                                                                                                                                                |         |        |    |    |    |    |    |    |    |   |   |   |   | 2.643825983 | (0.0011) |
| TM38B_HUMAN       | ITA2_HUMAN   | ITGA2  | P17301 | Integrin alpha-2 (CD49 antigen-like family member B) (Collagen receptor) (Platelet membrane glycoprotein Ia) (GPIa) (VLA-2 subunit alpha) (CD antigen CD49b)                                                                                                                                                                   | 129 kDa | 0.089  | 31 | 24 | 7  | 10 | 7  | 7  | 0  | 0 | 0 | 0 | 7 | -           | 95%      |
|                   |              |        |        |                                                                                                                                                                                                                                                                                                                                |         |        |    |    |    |    |    |    |    |   |   |   |   | 2.734210642 | (0.0045) |
| MSPD2_HUMAN (+1)  | BAIP2_HUMAN  | BAIAP2 | Q9UQB8 | Brain-specific angiogenesis inhibitor 1-associated protein 2 (BAI-associated protein 2) (BAI1-associated protein 2) (Protein BAP2) (Fas ligand-associated factor 3) (FLAF3) (Insulin receptor substrate p53/p58) (IRS-58) (IRSp53/58) (Insulin receptor substrate protein of 53 kDa) (IRSp53) (Insulin receptor substrate p53) | 61 kDa  | 0.039  | 27 | 21 | 6  | 8  | 4  | 4  | 5  | 1 | 0 | 3 | 2 | -           | 95%      |
|                   |              |        |        |                                                                                                                                                                                                                                                                                                                                |         |        |    |    |    |    |    |    |    |   |   |   |   | 2.741612351 | (0.0071) |
| CC115_HUMAN       | TMX4_HUMAN   | TMX4   | Q9H1E5 | Thioredoxin-related transmembrane protein 4 (Thioredoxin domain-containing protein 13)                                                                                                                                                                                                                                         | 39 kDa  | 0.14   | 27 | 21 | 6  | 8  | 3  | 5  | 5  | 0 | 1 | 2 | 3 | -           | 95%      |
|                   |              |        |        |                                                                                                                                                                                                                                                                                                                                |         |        |    |    |    |    |    |    |    |   |   |   |   | 2.741612351 | (0.0071) |



|                   |              |         |        |                                                                                                                                                                                                               |         |       |    |    |   |   |   |   |    |   |   |   |   |             |          |
|-------------------|--------------|---------|--------|---------------------------------------------------------------------------------------------------------------------------------------------------------------------------------------------------------------|---------|-------|----|----|---|---|---|---|----|---|---|---|---|-------------|----------|
| C9K0W8_HUMAN      | B7Z4A1_HUMAN |         | B7Z4A1 | cDNA FLJ50798, weakly similar to Ubiquinol-cytochrome c reductase complex ubiquinone-binding protein QP-C (EC 1.10.2.2)                                                                                       | 8 kDa   | 0.18  | 19 | 15 | 4 | 2 | 4 | 3 | 6  | 1 | 1 | 0 | 2 | -           | 95%      |
|                   |              |         |        |                                                                                                                                                                                                               |         |       |    |    |   |   |   |   |    |   |   |   |   | 2.764948904 | (0.018)  |
| GRAM4_HUMAN       | EFHD1_HUMAN  | EFHD1   | Q9BUP0 | EF-hand domain-containing protein D1 (EF-hand domain-containing protein 1) (Swiprosin-2)                                                                                                                      | 27 kDa  | 0.078 | 19 | 15 | 4 | 0 | 6 | 7 | 2  | 0 | 2 | 1 | 1 | -           | 95%      |
|                   |              |         |        |                                                                                                                                                                                                               |         |       |    |    |   |   |   |   |    |   |   |   |   | 2.764948904 | (0.018)  |
| FA10_HUMAN        | J3QKR5_HUMAN | CDK11B  | J3QKR5 | Cyclin-dependent kinase 11B                                                                                                                                                                                   | 90 kDa  | 0.041 | 15 | 12 | 3 | 0 | 3 | 4 | 5  | 1 | 0 | 1 | 1 | -           | 95%      |
|                   |              |         |        |                                                                                                                                                                                                               |         |       |    |    |   |   |   |   |    |   |   |   |   | 2.784899336 | (0.030)  |
| A8K2W6_HUMAN (+1) | GNL1_HUMAN   | GNL1    | P36915 | Guanine nucleotide-binding protein-like 1 (GTP-binding protein HSR1)                                                                                                                                          | 69 kDa  | 0.068 | 15 | 12 | 3 | 0 | 1 | 2 | 9  | 1 | 1 | 1 | 0 | -           | 95%      |
|                   |              |         |        |                                                                                                                                                                                                               |         |       |    |    |   |   |   |   |    |   |   |   |   | 2.784899336 | (0.030)  |
| HEAT2_HUMAN       | PLIN3_HUMAN  | PLIN3   | O60664 | Perilipin-3 (47 kDa mannose 6-phosphate receptor-binding protein) (47 kDa MPR-binding protein) (Cargo selection protein TIP47) (Mannose-6-phosphate receptor-binding protein 1) (Placental protein 17) (PP17) | 47 kDa  | 0.035 | 15 | 12 | 3 | 8 | 1 | 1 | 2  | 0 | 0 | 0 | 3 | -           | 95%      |
|                   |              |         |        |                                                                                                                                                                                                               |         |       |    |    |   |   |   |   |    |   |   |   |   | 2.784899336 | (0.030)  |
| C109B_HUMAN       | B4DG22_HUMAN | RPS6KA3 | B4DG22 | Ribosomal protein S6 kinase alpha-3 (cDNA FLJ56618, highly similar to Ribosomal protein S6 kinase alpha-3 (EC 2.7.11.1))                                                                                      | 81 kDa  | 0.074 | 11 | 9  | 2 | 0 | 4 | 4 | 1  | 1 | 1 | 0 | 0 | -           | 95%      |
|                   |              |         |        |                                                                                                                                                                                                               |         |       |    |    |   |   |   |   |    |   |   |   |   | 2.817166813 | (0.050)  |
| RABP1_HUMAN       | ATAD2_HUMAN  | ATAD2   | Q6PL18 | ATPase family AAA domain-containing protein 2 (EC 3.6.1.3) (AAA nuclear coregulator cancer-associated protein) (ANCCA)                                                                                        | 159 kDa | 0.18  | 11 | 9  | 2 | 0 | 4 | 5 | 0  | 0 | 0 | 2 | 0 | -           | 95%      |
|                   |              |         |        |                                                                                                                                                                                                               |         |       |    |    |   |   |   |   |    |   |   |   |   | 2.817166813 | (0.050)  |
| RS28_HUMAN        | CCD51_HUMAN  | CCDC51  | Q96ER9 | Coiled-coil domain-containing protein 51                                                                                                                                                                      | 46 kDa  | 0.3   | 11 | 9  | 2 | 1 | 0 | 0 | 8  | 0 | 0 | 0 | 2 | -           | 95%      |
|                   |              |         |        |                                                                                                                                                                                                               |         |       |    |    |   |   |   |   |    |   |   |   |   | 2.817166813 | (0.050)  |
| MRP3_HUMAN (+1)   | H1X_HUMAN    | H1FX    | Q92522 | Histone H1x                                                                                                                                                                                                   | 22 kDa  | 0.02  | 11 | 9  | 2 | 0 | 2 | 3 | 4  | 0 | 0 | 0 | 2 | -           | 95%      |
|                   |              |         |        |                                                                                                                                                                                                               |         |       |    |    |   |   |   |   |    |   |   |   |   | 2.817166813 | (0.050)  |
| SPRY7_HUMAN       | STING_HUMAN  | TMEM173 | Q86WV6 | Stimulator of interferon genes protein (hSTING) (Endoplasmic reticulum interferon stimulator) (ERIS) (Mediator of IRF3 activation) (hMITA) (Transmembrane protein 173)                                        | 42 kDa  | 0.17  | 32 | 25 | 7 | 8 | 5 | 1 | 11 | 0 | 2 | 2 | 3 | -           | 95%      |
|                   |              |         |        |                                                                                                                                                                                                               |         |       |    |    |   |   |   |   |    |   |   |   |   | 2.842532744 | (0.0030) |
| B7Z7N6_HUMAN (+1) | B8QFA1_HUMAN | PKP2    | B8QFA1 | Plakophilin-2 transcript variant 2b                                                                                                                                                                           | 97 kDa  | 0.072 | 7  | 6  | 1 | 2 | 1 | 0 | 3  | 0 | 1 | 0 | 0 | -           | 0%       |
|                   |              |         |        |                                                                                                                                                                                                               |         |       |    |    |   |   |   |   |    |   |   |   |   | 2.878174056 | (0.084)  |
| DDX56_HUMAN (+2)  | NFKB1_HUMAN  | NFKB1   | P19838 | Nuclear factor NF-kappa-B p105 subunit (DNA-binding factor KBF1) (EBP-1) (Nuclear factor of kappa light polypeptide gene enhancer in B-cells 1) [Cleaved into: Nuclear factor NF-kappa-B p50 subunit]         | 105 kDa | 0.037 | 7  | 6  | 1 | 2 | 1 | 2 | 1  | 0 | 0 | 0 | 1 | -           | 0%       |
|                   |              |         |        |                                                                                                                                                                                                               |         |       |    |    |   |   |   |   |    |   |   |   |   | 2.878174056 | (0.084)  |
| PLPL4_HUMAN       | B4E0E0_HUMAN | B4E0E0  | B4E0E0 | cDNA FLJ54898, highly similar to Homo sapiens transmembrane protein 41B (TMEM41B), mRNA                                                                                                                       | 33 kDa  | 0.26  | 8  | 6  | 1 | 3 | 1 | 2 | 0  | 0 | 0 | 1 | 0 | -           | 0%       |
|                   |              |         |        |                                                                                                                                                                                                               |         |       |    |    |   |   |   |   |    |   |   |   |   | 2.878174056 | (0.084)  |
| B3KNF4_HUMAN (+2) | G5E9A6_HUMAN | USP11   | G5E9A6 | Ubiquitin carboxyl-terminal hydrolase (EC 3.4.19.12)                                                                                                                                                          | 105 kDa | 0.056 | 7  | 6  | 1 | 0 | 0 | 0 | 6  | 0 | 0 | 1 | 0 | -           | 0%       |
|                   |              |         |        |                                                                                                                                                                                                               |         |       |    |    |   |   |   |   |    |   |   |   |   | 2.878174056 | (0.084)  |
| MRRP3_HUMAN       | WDFY1_HUMAN  | WDFY1   | Q8IWB7 | WD repeat and FYVE domain-containing protein 1 (FENS-1) (Phosphoinositide-binding protein 1) (WD40- and FYVE domain-containing protein 1) (Zinc finger FYVE domain-containing protein 17)                     | 46 kDa  | 0.039 | 7  | 6  | 1 | 2 | 1 | 3 | 0  | 0 | 1 | 0 | 0 | -           | 0%       |
|                   |              |         |        |                                                                                                                                                                                                               |         |       |    |    |   |   |   |   |    |   |   |   |   | 2.878174056 | (0.084)  |
| CRP_HUMAN         | AK1BA_HUMAN  | AKR1B10 | O60218 | Aldo-keto reductase family 1 member B10 (EC 1.1.1.-) (ARL-1) (Aldose reductase-like) (Aldose reductase-related protein) (ARP) (hARP) (Small intestine reductase) (SI reductase)                               | 36 kDa  | 0.11  | 8  | 6  | 1 | 0 | 2 | 4 | 0  | 0 | 1 | 0 | 0 | -           | 0%       |
|                   |              |         |        |                                                                                                                                                                                                               |         |       |    |    |   |   |   |   |    |   |   |   |   | 2.878174056 | (0.084)  |

|                   |              |         |        |                                                                                                                                                                                                          |         |       |     |     |    |    |    |    |    |    |   |    |   |   |             |                 |
|-------------------|--------------|---------|--------|----------------------------------------------------------------------------------------------------------------------------------------------------------------------------------------------------------|---------|-------|-----|-----|----|----|----|----|----|----|---|----|---|---|-------------|-----------------|
| COQ3_HUMAN        | KAD1_HUMAN   | AK1     | P00568 | Adenylate kinase isoenzyme 1 (AK 1) (EC 2.7.4.3) (EC 2.7.4.6) (ATP-AMP transphosphorylase 1) (ATP:AMP phosphotransferase) (Adenylate monophosphate kinase) (Myokinase)                                   | 22 kDa  | 0.089 | 7   | 6   | 1  | 0  | 1  | 1  | 4  | 0  | 1 | 0  | 0 | - | 2.878174056 | 0% (0.084)      |
| B4DKH6_HUMAN (+1) | ERLN2_HUMAN  | ERLN2   | O94905 | Erlin-2 (Endoplasmic reticulum lipid raft-associated protein 2) (Stomatin-prohibitin-flotillin-Hhc/K domain-containing protein 2) (SPFH domain-containing protein 2)                                     | 38 kDa  | 0.072 | 79  | 61  | 18 | 19 | 13 | 14 | 15 | 1  | 5 | 4  | 8 | - | 2.889821313 | 95% (< 0.00010) |
| RHOF_HUMAN        | HSDL1_HUMAN  | HSDL1   | Q3SXM5 | Inactive hydroxysteroid dehydrogenase-like protein 1                                                                                                                                                     | 37 kDa  | 0.095 | 21  | 16  | 4  | 9  | 2  | 4  | 1  | 1  | 0 | 1  | 2 | - | 2.935137323 | 95% (0.012)     |
| MAVS_HUMAN        | SCRB2_HUMAN  | SCARB2  | Q14108 | Lysosome membrane protein 2 (85 kDa lysosomal membrane sialoglycoprotein) (LGP85) (CD36 antigen-like 2) (Lysosome membrane protein II) (LIMP II) (Scavenger receptor class B member 2) (CD antigen CD36) | 54 kDa  | 0.048 | 33  | 26  | 7  | 9  | 7  | 6  | 4  | 0  | 1 | 4  | 3 | - | 2.95085763  | 95% (0.0020)    |
| QSOX2_HUMAN       | H3BN55_HUMAN | RAB27A  | H3BN55 | Ras-related protein Rab-27A (Fragment)                                                                                                                                                                   | 21 kDa  | 0.039 | 16  | 13  | 3  | 10 | 0  | 2  | 1  | 0  | 0 | 2  | 1 | - | 2.995118905 | 95% (0.019)     |
| PRRC1_HUMAN       | B4E2W6_HUMAN |         | B4E2W6 | cDNA FLJ58409, highly similar to Tight junction protein ZO-3                                                                                                                                             | 97 kDa  | 0.065 | 16  | 13  | 3  | 6  | 2  | 0  | 5  | 0  | 3 | 0  | 0 | - | 2.995118905 | 95% (0.019)     |
| B4DGF8_HUMAN (+2) | CO6A1_HUMAN  | COL6A1  | P12109 | Collagen alpha-1(VI) chain                                                                                                                                                                               | 109 kDa | 0.043 | 16  | 13  | 3  | 1  | 7  | 5  | 0  | 0  | 0 | 0  | 3 | - | 2.995118905 | 95% (0.019)     |
| WDR12_HUMAN       | EPIPL_HUMAN  | EPPK1   | P58107 | Epiplakin (450 kDa epidermal antigen)                                                                                                                                                                    | 556 kDa | 0.052 | 169 | 134 | 39 | 53 | 21 | 31 | 31 | 22 | 3 | 12 | 2 | - | 3.004763848 | 95% (< 0.00010) |
| G9JXB8_HUMAN (+1) | GOGA3_HUMAN  | GOLGA3  | Q08378 | Golgin subfamily A member 3 (Golgi complex-associated protein of 170 kDa) (GCP170) (Golgin-160)                                                                                                          | 167 kDa | 0.026 | 3   | 3   | 0  | 0  | 2  | 1  | 0  | 0  | 0 | 0  | 0 | - | 3.036896491 | 0% (0.15)       |
| A8K5N3_HUMAN (+1) | SCEL_HUMAN   | SCEL    | O95171 | Sciellin                                                                                                                                                                                                 | 78 kDa  | 0.042 | 3   | 3   | 0  | 1  | 0  | 0  | 2  | 0  | 0 | 0  | 0 | - | 3.036896491 | 0% (0.15)       |
| CHM2A_HUMAN       | AT8B1_HUMAN  | ATP8B1  | O43520 | Probable phospholipid-transporting ATPase 1C (EC 3.6.3.1) (ATPase class I type 8B member 1) (Familial intrahepatic cholestasis type 1)                                                                   | 144 kDa | 0.11  | 3   | 3   | 0  | 2  | 1  | 0  | 0  | 0  | 0 | 0  | 0 | - | 3.036896491 | 0% (0.15)       |
| A8MXZ4_HUMAN      | TBD2A_HUMAN  | TBC1D2  | Q9BYX2 | TBC1 domain family member 2A (Armus) (Prostate antigen recognized and identified by SEREX 1) (PARIS-1)                                                                                                   | 105 kDa | 0.048 | 3   | 3   | 0  | 2  | 1  | 0  | 0  | 0  | 0 | 0  | 0 | - | 3.036896491 | 0% (0.15)       |
| TSR1_HUMAN        | B4DEA3_HUMAN |         | B4DEA3 | cDNA FLJ56531, highly similar to UV excision repair protein RAD23 homolog B                                                                                                                              | 42 kDa  | 0.039 | 3   | 3   | 0  | 0  | 2  | 1  | 0  | 0  | 0 | 0  | 0 | - | 3.036896491 | 0% (0.15)       |
| GMPBP_HUMAN       | Q53G41_HUMAN |         | Q53G41 | Tripartite motif protein TRIM29 isoform alpha variant (Fragment)                                                                                                                                         | 66 kDa  | 0.12  | 3   | 3   | 0  | 2  | 0  | 1  | 0  | 0  | 0 | 0  | 0 | - | 3.036896491 | 0% (0.15)       |
| RM20_HUMAN        | B2RBE6_HUMAN |         | B2RBE6 | cDNA, FLJ95470, highly similar to Homo sapiens homolog of yeast Sec5 (SEC5), mRNA                                                                                                                        | 104 kDa | 0.14  | 3   | 3   | 0  | 1  | 1  | 1  | 0  | 0  | 0 | 0  | 0 | - | 3.036896491 | 0% (0.15)       |
| ANPRA_HUMAN       | ACD10_HUMAN  | ACAD10  | Q6JQN1 | Acyl-CoA dehydrogenase family member 10 (ACAD-10) (EC 1.3.99.-)                                                                                                                                          | 119 kDa | 0.031 | 3   | 3   | 0  | 3  | 0  | 0  | 0  | 0  | 0 | 0  | 0 | - | 3.036896491 | 0% (0.15)       |
| B3KUH0_HUMAN (+1) | Q6QNY7_HUMAN | GENE    | Q6QNY7 | UDP-N-acetylglucosamine-2-epimerase / N-acetylmannosamine kinase                                                                                                                                         | 79 kDa  | 0.049 | 3   | 3   | 0  | 0  | 0  | 3  | 0  | 0  | 0 | 0  | 0 | - | 3.036896491 | 0% (0.15)       |
| PTX3_HUMAN        | PKHG3_HUMAN  | PLEKHG3 | A1L390 | Fleckstrin homology domain-containing family G member 3 (PH domain-containing family G member 3)                                                                                                         | 134 kDa | 0.1   | 3   | 3   | 0  | 3  | 0  | 0  | 0  | 0  | 0 | 0  | 0 | - | 3.036896491 | 0% (0.15)       |
| VPS39_HUMAN       | H0YBJ4_HUMAN | MATN2   | H0YBJ4 | Matrilin-2 (Fragment)                                                                                                                                                                                    | 81 kDa  | 0.027 | 3   | 3   | 0  | 0  | 2  | 1  | 0  | 0  | 0 | 0  | 0 | - | 3.036896491 | 0% (0.15)       |

|                   |              |         |        |                                                                                                                                                                                                                                             |         |       |   |   |   |   |   |   |   |   |   |   |   |   |    |
|-------------------|--------------|---------|--------|---------------------------------------------------------------------------------------------------------------------------------------------------------------------------------------------------------------------------------------------|---------|-------|---|---|---|---|---|---|---|---|---|---|---|---|----|
| PTPRJ_HUMAN       | UB2J1_HUMAN  | UBE2J1  | Q9Y385 | Ubiquitin-conjugating enzyme E2 J1 (EC 6.3.2.19) (Non-canonical ubiquitin-conjugating enzyme 1) (NCUBE-1) (Yeast ubiquitin-conjugating enzyme UBC6 homolog E) (HsUBC6e)                                                                     | 35 kDa  | 0.023 | 3 | 3 | 0 | 0 | 1 | 1 | 1 | 0 | 0 | 1 | 0 | - | 0% |
| LRP10_HUMAN (+2)  | SYUG_HUMAN   | SNCG    | O76070 | Gamma-synuclein (Breast cancer-specific gene 1 protein) (Persyn) (Synoretin) (SR)                                                                                                                                                           | 13 kDa  | 0.056 | 3 | 3 | 0 | 0 | 0 | 0 | 3 | 0 | 0 | 0 | 0 | - | 0% |
| Q5HY15_HUMAN (+1) | IGHM_HUMAN   | IGHM    | P01871 | Ig mu chain C region                                                                                                                                                                                                                        | 49 kDa  | 0.5   | 3 | 3 | 0 | 0 | 0 | 0 | 3 | 0 | 0 | 0 | 0 | - | 0% |
| C9J8U2_HUMAN (+3) | RS28_HUMAN   | RPS28   | P62857 | 40S ribosomal protein S28                                                                                                                                                                                                                   | 8 kDa   | 0.051 | 3 | 3 | 0 | 0 | 1 | 2 | 0 | 0 | 0 | 0 | 0 | - | 0% |
| E9PJ81_HUMAN (+2) | B3KNF4_HUMAN |         | B3KNF4 | cDNA FLJ14514 fis, clone NT2RM1000742, highly similar to Prominin-1                                                                                                                                                                         | 96 kDa  | 0.12  | 3 | 3 | 0 | 3 | 0 | 0 | 0 | 0 | 0 | 0 | 0 | - | 0% |
| CP1A1_HUMAN (+2)  | RHOF_HUMAN   | RHOF    | Q9HBB0 | Rho-related GTP-binding protein RhoF (Rho family GTPase Rf) (Rho in filopodia)                                                                                                                                                              | 24 kDa  | 0.055 | 3 | 3 | 0 | 3 | 0 | 0 | 0 | 0 | 0 | 0 | 0 | - | 0% |
| B4DDH9_HUMAN (+1) | PTPRJ_HUMAN  | PTPRJ   | Q12913 | Receptor-type tyrosine-protein phosphatase eta (Protein-tyrosine phosphatase eta) (R-PTP-eta) (EC 3.1.3.48) (Density-enhanced phosphatase 1) (DEP-1) (HPTP eta) (Protein-tyrosine phosphatase receptor type J) (R-PTP-J) (CD antigen CD148) | 146 kDa | 0.042 | 3 | 3 | 0 | 0 | 1 | 2 | 0 | 0 | 0 | 0 | 0 | - | 0% |
| NO66_HUMAN        | LRP10_HUMAN  | LRP10   | Q7Z4F1 | Low-density lipoprotein receptor-related protein 10 (LRP-10)                                                                                                                                                                                | 76 kDa  | 0.042 | 3 | 3 | 0 | 1 | 0 | 2 | 0 | 0 | 0 | 0 | 0 | - | 0% |
| TIGAR_HUMAN       | B2RDH6_HUMAN |         | B2RDH6 | cDNA, FLJ96613, highly similar to Homo sapiens vacuolar protein sorting 33A (yeast) (VPS33A), mRNA                                                                                                                                          | 68 kDa  | 0.13  | 3 | 3 | 0 | 2 | 0 | 0 | 1 | 0 | 0 | 0 | 0 | - | 0% |
| NHRF2_HUMAN (+1)  | Q8N572_HUMAN | WBSCR16 | Q8N572 | WBSCR16 protein                                                                                                                                                                                                                             | 49 kDa  | 0.077 | 3 | 3 | 0 | 3 | 0 | 0 | 0 | 0 | 0 | 0 | 0 | - | 0% |
| B4DL80_HUMAN (+2) | TATD1_HUMAN  | TATDN1  | Q6P1N9 | Putative deoxyribonuclease TATDN1 (EC 3.1.21.-) (Hepatocarcinoma high expression protein)                                                                                                                                                   | 34 kDa  | 0.039 | 3 | 3 | 0 | 0 | 1 | 0 | 3 | 0 | 0 | 0 | 0 | - | 0% |
| B2RDH6_HUMAN (+1) | B0AZM0_HUMAN |         | B0AZM0 | cDNA, FLJ79460, highly similar to Voltage-gated potassium channel subunitbeta-2                                                                                                                                                             | 39 kDa  | 0.037 | 3 | 3 | 0 | 0 | 0 | 1 | 2 | 0 | 0 | 0 | 0 | - | 0% |
| D3DSU3_HUMAN (+1) | Q6ZT62_HUMAN | SH3BP1  | Q6ZT62 | SH3 domain-binding protein 1 (cDNA FLJ44925 fis, clone BRAMY3014613, highly similar to Homo sapiens SH3-domain binding protein 1 (SH3BP1))                                                                                                  | 66 kDa  | 0.022 | 3 | 3 | 0 | 0 | 1 | 2 | 0 | 0 | 0 | 0 | 0 | - | 0% |
| B2RDI6_HUMAN (+2) | A2A2Q9_HUMAN | AAR2    | A2A2Q9 | Protein AAR2 homolog                                                                                                                                                                                                                        | 45 kDa  | 0.028 | 3 | 3 | 0 | 0 | 0 | 2 | 1 | 0 | 0 | 0 | 0 | - | 0% |
| VAV2_HUMAN        | DEOC_HUMAN   | DERA    | Q9Y315 | Putative deoxyribose-phosphate aldolase (DERA) (EC 4.1.2.4) (2-deoxy-D-ribose 5-phosphate aldolase) (Phosphodeoxyriboaldolase) (Deoxyriboaldolase)                                                                                          | 35 kDa  | 0.031 | 3 | 3 | 0 | 1 | 0 | 0 | 2 | 0 | 0 | 0 | 0 | - | 0% |
| B7Z1V3_HUMAN (+1) | FOLR1_HUMAN  | FOLR1   | P15328 | Folate receptor alpha (FR-alpha) (Adult folate-binding protein) (FBP) (Folate receptor 1) (Folate receptor, adult) (KB cells FBP) (Ovarian tumor-associated antigen MOv18)                                                                  | 30 kDa  | 0.063 | 3 | 3 | 0 | 0 | 0 | 0 | 3 | 0 | 0 | 0 | 0 | - | 0% |
| Q8N572_HUMAN      | CARM1_HUMAN  | CARM1   | Q86X55 | Histone-arginine methyltransferase CARM1 (EC 2.1.1.-) (EC 2.1.1.125) (Coactivator-associated arginine methyltransferase 1) (Protein arginine N-methyltransferase 4)                                                                         | 66 kDa  | 0.059 | 3 | 3 | 0 | 1 | 1 | 0 | 1 | 0 | 0 | 0 | 0 | - | 0% |

|                   |              |         |        |                                                                                                                                                                                                                                                                           |        |       |    |    |   |    |   |   |    |   |   |   |   |   |   |             |               |           |
|-------------------|--------------|---------|--------|---------------------------------------------------------------------------------------------------------------------------------------------------------------------------------------------------------------------------------------------------------------------------|--------|-------|----|----|---|----|---|---|----|---|---|---|---|---|---|-------------|---------------|-----------|
| A6NEM5_HUMAN (+1) | GOGA7_HUMAN  | GOLGA7  | Q7ZSG4 | Golgin subfamily A member 7 (Golgi complex-associated protein of 16 kDa)                                                                                                                                                                                                  | 16 kDa | 0.069 | 3  | 3  | 0 | 1  | 0 | 1 | 1  | 0 | 0 | 0 | 0 | 0 | 0 | 3.036896491 | 0% (0.15)     |           |
| DHB8_HUMAN        | PAPD1_HUMAN  | MTPAP   | Q9NVV4 | Poly(A) RNA polymerase, mitochondrial (PAP) (EC 2.7.7.19) (PAP-associated domain-containing protein 1) (Polynucleotide adenylyltransferase) (Terminal uridylyltransferase 1) (TUTase 1) (mtPAP)                                                                           | 66 kDa | 0.1   | 3  | 3  | 0 | 1  | 0 | 0 | 2  | 0 | 0 | 0 | 0 | 0 | 0 | 3.036896491 | 0% (0.15)     |           |
| B4DFL3_HUMAN (+1) | DDAH2_HUMAN  | DDAH2   | O95865 | N(G),N(G)-dimethylarginine dimethylaminohydrolase 2 (DDAH-2) (Dimethylarginine dimethylaminohydrolase 2) (EC 3.5.3.18) (DDAHII) (Dimethylargininase-2) (Protein G6a) (S-phase protein)                                                                                    | 30 kDa | 0.14  | 3  | 3  | 0 | 0  | 0 | 0 | 3  | 0 | 0 | 0 | 0 | 0 | 0 | 3.036896491 | 0% (0.15)     |           |
| B2R960_HUMAN (+3) | B4E2A3_HUMAN |         | B4E2A3 | cDNA FLJ52834, moderately similar to Cold-inducible RNA-binding protein                                                                                                                                                                                                   | 16 kDa | 0.062 | 3  | 3  | 0 | 0  | 0 | 0 | 3  | 0 | 0 | 0 | 0 | 0 | 0 | 3.036896491 | 0% (0.15)     |           |
| C9JNZ0_HUMAN (+2) | B2RAU6_HUMAN |         | B2RAU6 | cDNA, FLJ95129, highly similar to Homo sapiens phosphatidylinositol glycan, class Q (PIGQ), transcript variant 2, mRNA                                                                                                                                                    | 65 kDa | 0.073 | 3  | 3  | 0 | 3  | 0 | 0 | 0  | 0 | 0 | 0 | 0 | 0 | 0 | 3.036896491 | 0% (0.15)     |           |
| TIM13_HUMAN       | C9JSC3_HUMAN | NCKIPSD | C9JSC3 | NCK-interacting protein with SH3 domain (Fragment)                                                                                                                                                                                                                        | 42 kDa | 0.26  | 3  | 3  | 0 | 0  | 1 | 1 | 1  | 0 | 0 | 0 | 0 | 0 | 0 | 3.036896491 | 0% (0.15)     |           |
| VATF_HUMAN        | CD59_HUMAN   | CD59    | P13987 | CD59 glycoprotein (IF5 antigen) (20 kDa homologous restriction factor) (HRF-20) (HRF20) (MAC-inhibitory protein) (MAC-IP) (MEM43 antigen) (Membrane attack complex inhibition factor) (MACIF) (Membrane inhibitor of reactive lysis) (MIRL) (Protectin) (CD antigen CD59) | 14 kDa | 0.24  | 3  | 3  | 0 | 1  | 1 | 0 | 1  | 0 | 0 | 0 | 0 | 0 | 0 | 0           | 3.036896491   | 0% (0.15) |
| HSP7E_HUMAN       | DOPPI1_HUMAN | DOLPP1  | Q86YN1 | Dolichyldiphosphatase 1 (EC 3.6.1.43) (Dolichyl pyrophosphate phosphatase 1)                                                                                                                                                                                              | 27 kDa | 0.049 | 3  | 3  | 0 | 1  | 0 | 0 | 2  | 0 | 0 | 0 | 0 | 0 | 0 | 3.036896491 | 0% (0.15)     |           |
| B3GN3_HUMAN (+2)  | A6XNE0_HUMAN |         | A6XNE0 | Glycodelin                                                                                                                                                                                                                                                                | 16 kDa | 0.07  | 3  | 3  | 0 | 3  | 0 | 0 | 0  | 0 | 0 | 0 | 0 | 0 | 0 | 3.036896491 | 0% (0.15)     |           |
| G8JLK1_HUMAN      | B2R7K1_HUMAN |         | B2R7K1 | cDNA, FLJ93479, highly similar to Homo sapiens solute carrier family 1 (neuronal/epithelial high affinity glutamate transporter, system Xag), member 1 (SLC1A1), nuclear gene encoding mitochondrial protein, mRNA                                                        | 57 kDa | 0.089 | 3  | 3  | 0 | 3  | 0 | 0 | 0  | 0 | 0 | 0 | 0 | 0 | 0 | 3.036896491 | 0% (0.15)     |           |
| R4GN49_HUMAN (+1) | PLCE_HUMAN   | AGPAT5  | Q9NUQ2 | 1-acyl-sn-glycerol-3-phosphate acyltransferase epsilon (EC 2.3.1.51) (1-acylglycerol-3-phosphate O-acyltransferase 5) (1-AGPAT acyltransferase 5) (1-AGPAT 5) (Lysophosphatidic acid acyltransferase epsilon) (LPAAT-epsilon)                                             | 42 kDa | 0.27  | 3  | 3  | 0 | 3  | 0 | 0 | 0  | 0 | 0 | 0 | 0 | 0 | 0 | 3.036896491 | 0% (0.15)     |           |
| H0YEE1_HUMAN (+1) | B7ZKL3_HUMAN | EPS8L2  | B7ZKL3 | EPS8L2 protein (Epidermal growth factor receptor kinase substrate 8-like protein 2)                                                                                                                                                                                       | 82 kDa | 0.13  | 12 | 10 | 2 | 6  | 1 | 2 | 1  | 2 | 0 | 0 | 0 | 0 | 0 | 3.092052087 | 95% (0.031)   |           |
| A8K6D2_HUMAN (+1) | BCS1_HUMAN   | BCS1L   | Q9Y276 | Mitochondrial chaperone BCS1 (h-BCS1) (BCS1-like protein)                                                                                                                                                                                                                 | 48 kDa | 0.22  | 12 | 10 | 2 | 3  | 3 | 2 | 2  | 0 | 2 | 0 | 0 | 0 | 0 | 3.092052087 | 95% (0.031)   |           |
| CRK_HUMAN         | B4DKK2_HUMAN | SRI     | B4DKK2 | Sorcini (cDNA FLJ60640, highly similar to Sorcini)                                                                                                                                                                                                                        | 20 kDa | 0.2   | 12 | 10 | 2 | 3  | 3 | 1 | 3  | 0 | 2 | 0 | 0 | 0 | 0 | 3.092052087 | 95% (0.031)   |           |
| PMVK_HUMAN        | KCRU_HUMAN   | CKMT1A  | P12532 | Creatine kinase U-type, mitochondrial (EC 2.7.3.2) (Acidic-type mitochondrial creatine kinase) (Mia-CK) (Ubiquitous mitochondrial creatine kinase) (U-MiCK)                                                                                                               | 47 kDa | 0.11  | 39 | 31 | 8 | 13 | 5 | 3 | 11 | 2 | 0 | 6 | 0 | 0 | 0 | 3.114908873 | 95% (0.00055) |           |

|                     |              |         |        |                                                                                                                                                                                                                                                          |         |       |    |    |    |    |    |    |    |   |   |   |   |   |                 |
|---------------------|--------------|---------|--------|----------------------------------------------------------------------------------------------------------------------------------------------------------------------------------------------------------------------------------------------------------|---------|-------|----|----|----|----|----|----|----|---|---|---|---|---|-----------------|
| SIAT1_HUMAN         | DHRS3_HUMAN  | DHRS3   | O75911 | Short-chain dehydrogenase/reductase 3 (EC 1.1.1.300) (DD83.1) (Retinal short-chain dehydrogenase/reductase 1) (retSDR1)                                                                                                                                  | 34 kDa  | 0.071 | 26 | 21 | 5  | 12 | 2  | 7  | 0  | 0 | 1 | 3 | 1 | - | 95% (0.0031)    |
| FA98B_HUMAN         | H3BPE1_HUMAN | MACF1   | H3BPE1 | Microtubule-actin cross-linking factor 1, isoforms 1/2/3/5                                                                                                                                                                                               | 857 kDa | 0.13  | 54 | 43 | 11 | 9  | 11 | 19 | 5  | 4 | 0 | 7 | 0 | - | 95% (< 0.00010) |
| I3L3B4_HUMAN        | COTL1_HUMAN  | COTL1   | Q14019 | Coactosin-like protein                                                                                                                                                                                                                                   | 16 kDa  | 0.23  | 7  | 7  | 1  | 0  | 2  | 5  | 0  | 0 | 0 | 1 | 0 | - | 95% (0.050)     |
| PTBP3_HUMAN         | FA83H_HUMAN  | FAM83H  | Q6ZRV2 | Protein FAM83H                                                                                                                                                                                                                                           | 127 kDa | 0.063 | 8  | 7  | 1  | 5  | 0  | 0  | 2  | 1 | 0 | 0 | 0 | - | 95% (0.050)     |
| TATD1_HUMAN         | VPS16_HUMAN  | VPS16   | Q9H269 | Vacuolar protein sorting-associated protein 16 homolog (hVPS16)                                                                                                                                                                                          | 95 kDa  | 0.13  | 8  | 7  | 1  | 2  | 2  | 1  | 2  | 0 | 1 | 0 | 0 | - | 95% (0.050)     |
| F5H2X3_HUMAN        | A8K5C2_HUMAN |         | A8K5C2 | cDNA FLJ75055                                                                                                                                                                                                                                            | 51 kDa  | 0.034 | 8  | 7  | 1  | 3  | 4  | 0  | 0  | 1 | 0 | 0 | 0 | - | 95% (0.050)     |
| HINT3_HUMAN         | B1AUU8_HUMAN | EPS15   | B1AUU8 | Epidermal growth factor receptor substrate 15                                                                                                                                                                                                            | 84 kDa  | 0.14  | 8  | 7  | 1  | 1  | 4  | 2  | 0  | 1 | 0 | 0 | 0 | - | 95% (0.050)     |
| A8K7A1_HUMAN (+1)   | COX15_HUMAN  | COX15   | Q7KZN9 | Cytochrome c oxidase assembly protein COX15 homolog                                                                                                                                                                                                      | 46 kDa  | 0.043 | 8  | 7  | 1  | 3  | 0  | 0  | 4  | 0 | 1 | 0 | 0 | - | 95% (0.050)     |
| B2ZGL7_HUMAN N (+4) | G3V2F7_HUMAN | TMEM189 | G3V2F7 | HCG2044781 (Protein TMEM189-UBE2V1) (Transmembrane protein 189)                                                                                                                                                                                          | 42 kDa  | 0.13  | 8  | 7  | 1  | 1  | 1  | 3  | 2  | 1 | 0 | 0 | 0 | - | 95% (0.050)     |
| EXOS4_HUMAN         | B3KSG7_HUMAN |         | B3KSG7 | cDNA FLJ36171 fis, clone TEST12026215, highly similar to Homo sapiens two pore segment channel 1 (TPCN1), mRNA                                                                                                                                           | 94 kDa  | 0.11  | 8  | 7  | 1  | 4  | 2  | 1  | 0  | 0 | 0 | 0 | 1 | - | 95% (0.050)     |
| B0AZM0_HUMAN (+6)   | A8K9V9_HUMAN |         | A8K9V9 | cDNA FLJ76064                                                                                                                                                                                                                                            | 35 kDa  | 0.084 | 8  | 7  | 1  | 4  | 0  | 2  | 1  | 0 | 0 | 1 | 0 | - | 95% (0.050)     |
| A2VDI4_HUMAN N (+2) | ITB8_HUMAN   | ITGB8   | P26012 | Integrin beta-8                                                                                                                                                                                                                                          | 86 kDa  | 0.043 | 8  | 7  | 1  | 3  | 1  | 1  | 2  | 0 | 0 | 1 | 0 | - | 95% (0.050)     |
| TIG1_HUMAN          | D3DQ48_HUMAN | TMEM59  | D3DQ48 | Transmembrane protein 59, isoform CRA_e                                                                                                                                                                                                                  | 36 kDa  | 0.071 | 8  | 7  | 1  | 0  | 4  | 3  | 0  | 1 | 0 | 0 | 0 | - | 95% (0.050)     |
| NCKPL_HUMAN         | CX6B1_HUMAN  | COX6B1  | P14854 | Cytochrome c oxidase subunit 6B1 (Cytochrome c oxidase subunit Vlb isoform 1) (COX Vlb-1)                                                                                                                                                                | 10 kDa  | 0.023 | 8  | 7  | 1  | 1  | 1  | 2  | 3  | 1 | 0 | 0 | 0 | - | 95% (0.050)     |
| BRCC3_HUMAN N (+2)  | B4DWA0_HUMAN |         | B4DWA0 | cDNA FLJ54188, moderately similar to High mobility group protein HMG-I/HMG-Y                                                                                                                                                                             | 34 kDa  | 0.076 | 13 | 11 | 2  | 2  | 3  | 1  | 5  | 2 | 0 | 0 | 0 | - | 95% (0.019)     |
| SPEE_HUMAN          | CD109_HUMAN  | CD109   | Q6YHK3 | CD109 antigen (150 kDa TGF-beta-1-binding protein) (C3 and PZP-like alpha-2-macroglobulin domain-containing protein 7) (Platelet-specific Gov antigen) (p180) (r150) (CD antigen CD109)                                                                  | 162 kDa | 0.076 | 23 | 19 | 4  | 6  | 7  | 6  | 0  | 2 | 0 | 2 | 0 | - | 95% (0.0031)    |
| TPPC5_HUMAN         | ANXA9_HUMAN  | ANXA9   | O76027 | Annexin A9 (Annexin XXXI) (Annexin-31) (Annexin-9) (Pemphaxin)                                                                                                                                                                                           | 38 kDa  | 0.11  | 29 | 23 | 5  | 13 | 0  | 1  | 10 | 5 | 0 | 0 | 0 | - | 95% (0.0013)    |
| B7Z377_HUMAN N (+2) | S12A2_HUMAN  | SLC12A2 | P55011 | Solute carrier family 12 member 2 (Basolateral Na-K-Cl symporter) (Bumetanide-sensitive sodium-(potassium)-chloride cotransporter 1)                                                                                                                     | 131 kDa | 0.19  | 38 | 31 | 7  | 1  | 14 | 17 | 0  | 5 | 0 | 1 | 1 | - | 95% (0.00023)   |
| MRT4_HUMAN          | A4D2Q0_HUMAN | UNC84A  | A4D2Q0 | SUN domain-containing protein 1 (Unc-84 homolog A (C. elegans))                                                                                                                                                                                          | 108 kDa | 0.088 | 19 | 16 | 3  | 13 | 2  | 0  | 2  | 1 | 0 | 0 | 2 | - | 95% (0.0047)    |
| DDX60_HUMAN         | APEX1_HUMAN  | APEX1   | P27695 | DNA-(apurinic or apyrimidinic site) lyase (EC 3.1.-.-) (EC 4.2.99.18) (APEX nuclease) (APEX) (Apyrimidinic endonuclease 1) (AP endonuclease 1) (APE-1) (REF-1) (Redox factor-1) (Cleared into: DNA-(apurinic or apyrimidinic site) lyase, mitochondrial) | 36 kDa  | 0.016 | 19 | 16 | 3  | 0  | 1  | 1  | 14 | 1 | 1 | 1 | 0 | - | 95% (0.0047)    |

|                   |              |          |        |                                                                                                                                                                                                                                                                                                                                                                          |         |       |    |    |   |   |   |   |    |   |   |   |   |   |             |             |
|-------------------|--------------|----------|--------|--------------------------------------------------------------------------------------------------------------------------------------------------------------------------------------------------------------------------------------------------------------------------------------------------------------------------------------------------------------------------|---------|-------|----|----|---|---|---|---|----|---|---|---|---|---|-------------|-------------|
| GTDC2_HUMAN       | GDPD3_HUMAN  | GDPD3    | Q7L5L3 | Glycerophosphodiester phosphodiesterase domain-containing protein 3 (EC 3.1.-.-)                                                                                                                                                                                                                                                                                         | 37 kDa  | 0.074 | 14 | 12 | 2 | 1 | 1 | 0 | 10 | 1 | 0 | 1 | 0 | - | 3.641843827 | 95% (0.012) |
| AL3B1_HUMAN (+1)  | F8J390_HUMAN | PKP3     | F8J390 | Plakophilin 3b (Fragment)                                                                                                                                                                                                                                                                                                                                                | 89 kDa  | 0.11  | 9  | 8  | 1 | 4 | 0 | 2 | 2  | 1 | 0 | 0 | 0 | - | 3.672247474 | 95% (0.029) |
| B7Z3I9_HUMAN (+2) | H0Y6T6_HUMAN | NRM      | H0Y6T6 | Nurim (Fragment)                                                                                                                                                                                                                                                                                                                                                         | 30 kDa  | 0.096 | 9  | 8  | 1 | 2 | 0 | 0 | 6  | 0 | 0 | 0 | 1 | - | 3.672247474 | 95% (0.029) |
| A16A1_HUMAN       | DNJC5_HUMAN  | DNAJC5   | Q9H3Z4 | DnaJ homolog subfamily C member 5 (Cysteine string protein) (CSP)                                                                                                                                                                                                                                                                                                        | 22 kDa  | 0.031 | 9  | 8  | 1 | 2 | 2 | 2 | 2  | 0 | 0 | 0 | 1 | - | 3.672247474 | 95% (0.029) |
| A8K367_HUMAN (+3) | SPS1_HUMAN   | SEPHS1   | P49903 | Selenide, water dikinase 1 (EC 2.7.9.3) (Selenium donor protein 1) (Selenophosphate synthase 1)                                                                                                                                                                                                                                                                          | 43 kDa  | 0.035 | 9  | 8  | 1 | 0 | 3 | 1 | 4  | 1 | 0 | 0 | 0 | - | 3.672247474 | 95% (0.029) |
| Q7Z524_HUMAN      | SRRM2_HUMAN  | SRRM2    | Q9UQ35 | Serine/arginine repetitive matrix protein 2 (300 kDa nuclear matrix antigen) (Serine/arginine-rich splicing factor-related nuclear matrix protein of 300 kDa) (SR-related nuclear matrix protein of 300 kDa) (Ser/Arg-related nuclear matrix protein of 300 kDa) (Splicing coactivator subunit SRm300) (Tax-responsive enhancer element-binding protein 803) (TaxREB803) | 300 kDa | 0.053 | 4  | 4  | 0 | 0 | 2 | 2 | 0  | 0 | 0 | 0 | 0 | - | 3.751508572 | 0% (0.078)  |
| B2RBP3_HUMAN (+2) | B7ZKT7_HUMAN | FYCO1    | B7ZKT7 | FYVE and coiled-coil domain-containing protein 1 (Uncharacterized protein)                                                                                                                                                                                                                                                                                               | 169 kDa | 0.065 | 4  | 4  | 0 | 4 | 0 | 0 | 0  | 0 | 0 | 0 | 0 | - | 3.751508572 | 0% (0.078)  |
| GPAT4_HUMAN       | LARP1_HUMAN  | LARP1    | Q6PKG0 | La-related protein 1 (La ribonucleoprotein domain family member 1)                                                                                                                                                                                                                                                                                                       | 124 kDa | 0.059 | 4  | 4  | 0 | 0 | 2 | 2 | 0  | 0 | 0 | 0 | 0 | - | 3.751508572 | 0% (0.078)  |
| Q6ZT62_HUMAN      | SH3L1_HUMAN  | SH3BGR1  | O75368 | SH3 domain-binding glutamic acid-rich-like protein                                                                                                                                                                                                                                                                                                                       | 13 kDa  | 0.04  | 4  | 4  | 0 | 0 | 1 | 1 | 2  | 0 | 0 | 0 | 0 | - | 3.751508572 | 0% (0.078)  |
| G3V3Y1_HUMAN (+1) | AUHM_HUMAN   | AUH      | Q13825 | Methylglutaconyl-CoA hydratase, mitochondrial (EC 4.2.1.18) (AU-specific RNA-binding enoyl-CoA hydratase) (AU-binding protein/enoyl-CoA hydratase)                                                                                                                                                                                                                       | 36 kDa  | 0.091 | 4  | 4  | 0 | 4 | 0 | 0 | 0  | 0 | 0 | 0 | 0 | - | 3.751508572 | 0% (0.078)  |
| A8K6N3_HUMAN (+1) | Q53F93_HUMAN |          | Q53F93 | Palmitoylated membrane protein 1 variant (Fragment)                                                                                                                                                                                                                                                                                                                      | 52 kDa  | 0.043 | 4  | 4  | 0 | 0 | 2 | 2 | 0  | 0 | 0 | 0 | 0 | - | 3.751508572 | 0% (0.078)  |
| B7SBB1_HUMAN      | SBDS_HUMAN   | SBDS     | Q9Y3A5 | Ribosome maturation protein SBDS (Shwachman-Bodian-Diamond syndrome protein)                                                                                                                                                                                                                                                                                             | 29 kDa  | 0.079 | 4  | 4  | 0 | 0 | 0 | 0 | 4  | 0 | 0 | 0 | 0 | - | 3.751508572 | 0% (0.078)  |
| GSH0_HUMAN        | AT11A_HUMAN  | ATP11A   | P98196 | Probable phospholipid-transporting ATPase 11A (EC 3.6.3.1) (ATPase 11A) (ATPase class VI type 11A)                                                                                                                                                                                                                                                                       | 130 kDa | 0.21  | 4  | 4  | 0 | 1 | 2 | 1 | 0  | 0 | 0 | 0 | 0 | - | 3.751508572 | 0% (0.078)  |
| UBA7_HUMAN        | B3KQQ0_HUMAN |          | B3KQQ0 | cDNA PSEC0007 fis, clone NT2RM1000634, highly similar to FK506-binding protein 9 (EC 5.2.1.8)                                                                                                                                                                                                                                                                            | 63 kDa  | 0.031 | 4  | 4  | 0 | 0 | 0 | 3 | 1  | 0 | 0 | 0 | 0 | - | 3.751508572 | 0% (0.078)  |
| A8K3E4_HUMAN (+1) | CATG_HUMAN   | CTSG     | P08311 | Cathepsin G (CG) (EC 3.4.21.20)                                                                                                                                                                                                                                                                                                                                          | 29 kDa  | 0.042 | 4  | 4  | 0 | 2 | 0 | 0 | 2  | 0 | 0 | 0 | 0 | - | 3.751508572 | 0% (0.078)  |
| MOQXN5_HUMAN (+1) | OSBL3_HUMAN  | OSBPL3   | Q9H4L5 | Oxysterol-binding protein-related protein 3 (ORP-3) (OSBP-related protein 3)                                                                                                                                                                                                                                                                                             | 101 kDa | 0.063 | 4  | 4  | 0 | 3 | 0 | 1 | 0  | 0 | 0 | 0 | 0 | - | 3.751508572 | 0% (0.078)  |
| E7ETU7_HUMAN (+2) | IF44L_HUMAN  | IFI44L   | Q53G44 | Interferon-induced protein 44-like                                                                                                                                                                                                                                                                                                                                       | 51 kDa  | 0.048 | 4  | 4  | 0 | 0 | 0 | 0 | 4  | 0 | 0 | 0 | 0 | - | 3.751508572 | 0% (0.078)  |
| B3KTL0_HUMAN (+1) | CI142_HUMAN  | C9orf142 | Q9BUH6 | Uncharacterized protein C9orf142                                                                                                                                                                                                                                                                                                                                         | 22 kDa  | 0.062 | 4  | 4  | 0 | 0 | 0 | 0 | 4  | 0 | 0 | 0 | 0 | - | 3.751508572 | 0% (0.078)  |
| A2IDC6_HUMAN (+2) | B4DRD3_HUMAN |          | B4DRD3 | cDNA FLJ58123, highly similar to Tissue-type plasminogen activator (EC 3.4.21.68)                                                                                                                                                                                                                                                                                        | 58 kDa  | 0.087 | 4  | 4  | 0 | 4 | 0 | 0 | 0  | 0 | 0 | 0 | 0 | - | 3.751508572 | 0% (0.078)  |
| S35E1_HUMAN       | TM260_HUMAN  | TMEM260  | Q9NX78 | Transmembrane protein 260                                                                                                                                                                                                                                                                                                                                                | 80 kDa  | 0.088 | 4  | 4  | 0 | 4 | 0 | 0 | 0  | 0 | 0 | 0 | 0 | - | 3.751508572 | 0% (0.078)  |

|                    |              |               |        |                                                                                                                                                                                                      |         |       |    |    |   |    |   |   |    |   |   |   |   |   |   |                 |
|--------------------|--------------|---------------|--------|------------------------------------------------------------------------------------------------------------------------------------------------------------------------------------------------------|---------|-------|----|----|---|----|---|---|----|---|---|---|---|---|---|-----------------|
| A2A2Q9_HUMAN (+1)  | B2R745_HUMAN |               | B2R745 | cDNA, FLJ93277, highly similar to Homo sapiens solute carrier family 30 (zinc transporter), member 9(SLC30A9), mRNA                                                                                  | 63 kDa  | 0.078 | 4  | 4  | 0 | 4  | 0 | 0 | 0  | 0 | 0 | 0 | 0 | 0 | - | 0%              |
| DEOC_HUMAN (+1)    | H3BRY5_HUMAN | SULT1A1       | H3BRY5 | Sulfotransferase 1A1 (Fragment)                                                                                                                                                                      | 33 kDa  | 0.079 | 4  | 4  | 0 | 0  | 0 | 0 | 4  | 0 | 0 | 0 | 0 | 0 | - | 0%              |
| A8K9V7_HUMAN (+12) | MRP3_HUMAN   | ABCC3         | O15438 | Canalicular multispecific organic anion transporter 2 (ATP-binding cassette sub-family C member 3) (Multi-specific organic anion transporter D) (MOAT-D) (Multidrug resistance-associated protein 3) | 169 kDa | 0.037 | 4  | 4  | 0 | 0  | 3 | 1 | 0  | 0 | 0 | 0 | 0 | 0 | - | 0%              |
| B3KY51_HUMAN (+1)  | B4DKH6_HUMAN |               | B4DKH6 | cDNA FLJ51234, highly similar to Bactericidal permeability-increasing protein                                                                                                                        | 45 kDa  | 0.046 | 4  | 4  | 0 | 4  | 0 | 0 | 0  | 0 | 0 | 0 | 0 | 0 | - | 0%              |
| FOLR1_HUMAN        | HINT3_HUMAN  | HINT3         | Q9NQE9 | Histidine triad nucleotide-binding protein 3 (HINT-3) (EC 3.-.-.-)                                                                                                                                   | 20 kDa  | 0.074 | 3  | 4  | 0 | 3  | 0 | 0 | 1  | 0 | 0 | 0 | 0 | 0 | - | 0%              |
| H7C189_HUMAN (+3)  | A16A1_HUMAN  | ALDH16A1      | Q8IZ83 | Aldehyde dehydrogenase family 16 member A1                                                                                                                                                           | 85 kDa  | 0.064 | 4  | 4  | 0 | 0  | 1 | 1 | 2  | 0 | 0 | 0 | 0 | 0 | - | 0%              |
| H6A2E0_HUMAN       | RRFM_HUMAN   | MRRF          | Q96E11 | Ribosome-recycling factor, mitochondrial (RRF) (Ribosome-releasing factor, mitochondrial)                                                                                                            | 29 kDa  | 0.4   | 4  | 4  | 0 | 1  | 1 | 0 | 2  | 0 | 0 | 0 | 0 | 0 | - | 0%              |
| AL1A1_HUMAN (+1)   | MPZL2_HUMAN  | MPZL2         | O60487 | Myelin protein zero-like protein 2 (Epithelial V-like antigen 1)                                                                                                                                     | 24 kDa  | 0.096 | 4  | 4  | 0 | 2  | 1 | 1 | 0  | 0 | 0 | 0 | 0 | 0 | - | 0%              |
| ISCA2_HUMAN        | UPP1_HUMAN   | UPP1          | Q16831 | Uridine phosphorylase 1 (UPase 1) (UrdPase 1) (EC 2.4.2.3)                                                                                                                                           | 34 kDa  | 0.16  | 4  | 4  | 0 | 0  | 3 | 1 | 0  | 0 | 0 | 0 | 0 | 0 | - | 0%              |
| L7QJN0_HUMAN       | TALDO_HUMAN  | TALDO1        | P37837 | Transaldolase (EC 2.2.1.2)                                                                                                                                                                           | 38 kDa  | 0.29  | 25 | 21 | 4 | 2  | 2 | 9 | 8  | 1 | 1 | 1 | 1 | 1 | - | 95%             |
| CARM1_HUMAN        | A8K9B9_HUMAN |               | A8K9B9 | cDNA FLJ77391, highly similar to Homo sapiens EHD domain containing 4 (EHD4), mRNA                                                                                                                   | 61 kDa  | 0.038 | 20 | 17 | 3 | 4  | 5 | 0 | 8  | 0 | 3 | 0 | 0 | 0 | - | 95%             |
| J3QT22_HUMAN (+1)  | Q59FB9_HUMAN |               | Q59FB9 | Toll interacting protein variant (Fragment)                                                                                                                                                          | 39 kDa  | 0.05  | 15 | 13 | 2 | 6  | 4 | 2 | 2  | 0 | 0 | 1 | 1 | 1 | - | 95%             |
| B5BUI8_HUMAN (+1)  | Q5HYL6_HUMAN | DKFZp686E1899 | Q5HYL6 | Putative uncharacterized protein DKFZp686E1899                                                                                                                                                       | 40 kDa  | 0.22  | 15 | 13 | 2 | 1  | 1 | 7 | 4  | 0 | 0 | 2 | 0 | 0 | - | 95%             |
| B4DDV1_HUMAN (+1)  | B2R6P3_HUMAN |               | B2R6P3 | cDNA, FLJ93047, highly similar to Homo sapiens matrix metalloproteinase 14 (membrane-inserted) (MMP14), mRNA                                                                                         | 66 kDa  | 0.06  | 14 | 13 | 2 | 3  | 5 | 5 | 0  | 0 | 0 | 0 | 2 | 2 | - | 95%             |
| A8K3S0_HUMAN (+5)  | A8K6K8_HUMAN |               | A8K6K8 | cDNA FLJ77325                                                                                                                                                                                        | 55 kDa  | 0.11  | 36 | 31 | 6 | 14 | 5 | 3 | 9  | 0 | 1 | 2 | 2 | 2 | - | 95% (< 0.00010) |
| TRMB_HUMAN         | E5KSE7_HUMAN |               | E5KSE7 | Mitochondrial short-chain specific acyl-CoA dehydrogenase                                                                                                                                            | 44 kDa  | 0.094 | 21 | 18 | 3 | 5  | 5 | 3 | 5  | 0 | 1 | 0 | 1 | 1 | - | 95%             |
| ARF5_HUMAN (+1)    | F8VXY3_HUMAN | OAS1          | F8VXY3 | 2'-5'-oligoadenylate synthase 1                                                                                                                                                                      | 41 kDa  | 0.28  | 21 | 18 | 3 | 0  | 0 | 0 | 18 | 0 | 3 | 0 | 0 | 0 | - | 95%             |
| RRFM_HUMAN         | ABCD1_HUMAN  | ABCD1         | P33897 | ATP-binding cassette sub-family D member 1 (Adrenoleukodystrophy protein) (ALDP)                                                                                                                     | 83 kDa  | 0.1   | 10 | 9  | 1 | 4  | 1 | 0 | 4  | 0 | 0 | 1 | 0 | 0 | - | 95%             |
| GMPPA_HUMAN        | NDUS5_HUMAN  | NDUF55        | O43920 | NADH dehydrogenase [ubiquinone] iron-sulfur protein 5 (Complex I-15 kDa) (CI-15 kDa) (NADH-ubiquinone oxidoreductase 15 kDa subunit)                                                                 | 13 kDa  | 0.064 | 10 | 9  | 1 | 3  | 2 | 2 | 2  | 0 | 0 | 1 | 0 | 0 | - | 95%             |
| MPZL2_HUMAN        | DHSO_HUMAN   | SORD          | Q00796 | Sorbitol dehydrogenase (EC 1.1.1.14) (L-iditol 2-dehydrogenase)                                                                                                                                      | 38 kDa  | 0.1   | 10 | 9  | 1 | 0  | 0 | 0 | 9  | 0 | 0 | 1 | 0 | 0 | - | 95%             |
| GOGA7_HUMAN        | ECHD1_HUMAN  | ECHDC1        | Q9NTX5 | Ethylmalonyl-CoA decarboxylase (EC 4.1.1.94) (Enoyl-CoA hydratase)                                                                                                                                   | 34 kDa  | 0.18  | 10 | 9  | 1 | 3  | 2 | 1 | 3  | 0 | 0 | 1 | 0 | 0 | - | 95%             |

|                   |              |          |        |                                                                                                                                                                                                                   |         |       |      |      |     |     |     |     |     |    |    |     |    |   |           |                |
|-------------------|--------------|----------|--------|-------------------------------------------------------------------------------------------------------------------------------------------------------------------------------------------------------------------|---------|-------|------|------|-----|-----|-----|-----|-----|----|----|-----|----|---|-----------|----------------|
|                   |              |          |        | domain-containing protein 1) (Methylmalonyl-CoA decarboxylase) (MMCD) (EC 4.1.1.41)                                                                                                                               |         |       |      |      |     |     |     |     |     |    |    |     |    |   |           |                |
| PAPD1_HUMAN       | PLEC_HUMAN   | PLEC     | Q15149 | Plectin (PCN) (PLTN) (Hemidesmosomal protein 1) (HD1) (Plectin-1)                                                                                                                                                 | 532 kDa | 0.043 | 1357 | 1115 | 246 | 418 | 276 | 278 | 146 | 34 | 22 | 108 | 83 | - | 4.0764900 | 95% (<0.00010) |
| HEAT3_HUMAN       | ANK1_HUMAN   | ANK1     | P16157 | Ankyrin-1 (ANK-1) (Ankyrin-R) (Erythrocyte ankyrin)                                                                                                                                                               | 206 kDa | 0.035 | 33   | 28   | 5   | 0   | 12  | 16  | 0   | 0  | 0  | 5   | 0  | - | 4.1812410 | 95% (0.00012)  |
| NENF_HUMAN        | CIB1_HUMAN   | CIB1     | Q99828 | Calcium and integrin-binding protein 1 (CIB) (Calcium- and integrin-binding protein) (CIBP) (Calmyrin) (DNA-PKcs-interacting protein) (Kinase-interacting protein) (KIP) (SNK-interacting protein 2-28) (SIP2-28) | 22 kDa  | 0.15  | 16   | 14   | 2   | 4   | 2   | 0   | 8   | 0  | 0  | 0   | 2  | - | 4.1916638 | 95% (0.0042)   |
| PAR6B_HUMAN       | PPB1_HUMAN   | ALPP     | P05187 | Alkaline phosphatase, placental type (EC 3.1.3.1) (Alkaline phosphatase Regan isozyme) (Placental alkaline phosphatase 1) (PLAP-1)                                                                                | 58 kDa  | 0.081 | 28   | 24   | 4   | 14  | 5   | 5   | 0   | 0  | 0  | 0   | 4  | - | 4.2968021 | 95% (0.00028)  |
| INT5_HUMAN        | DOCK7_HUMAN  | DOCK7    | Q96N67 | Dedicator of cytokinesis protein 7                                                                                                                                                                                | 243 kDa | 0.03  | 5    | 5    | 0   | 1   | 0   | 3   | 1   | 0  | 0  | 0   | 0  | - | 4.4661390 | 95% (0.042)    |
| NCALD_HUMAN       | PERE_HUMAN   | EPX      | P11678 | Eosinophil peroxidase (EPO) (EC 1.11.1.7) [Cleared into: Eosinophil peroxidase light chain; Eosinophil peroxidase heavy chain]                                                                                    | 81 kDa  | 0.17  | 5    | 5    | 0   | 2   | 0   | 0   | 3   | 0  | 0  | 0   | 0  | - | 4.4661390 | 95% (0.042)    |
| E7EQU1_HUMAN (+3) | TB182_HUMAN  | TNKS1BP1 | Q9COC2 | 182 kDa tankyrase-1-binding protein                                                                                                                                                                               | 182 kDa | 0.15  | 5    | 5    | 0   | 2   | 1   | 2   | 0   | 0  | 0  | 0   | 0  | - | 4.4661390 | 95% (0.042)    |
| UPP1_HUMAN        | SLMAP_HUMAN  | SLMAP    | Q14BN4 | Sarcolemmal membrane-associated protein (Sarcolemmal-associated protein)                                                                                                                                          | 95 kDa  | 0.068 | 5    | 5    | 0   | 5   | 0   | 0   | 0   | 0  | 0  | 0   | 0  | - | 4.4661390 | 95% (0.042)    |
| B1AZU4_HUMAN (+1) | ITCH_HUMAN   | ITCH     | Q96J02 | E3 ubiquitin-protein ligase Itchy homolog (Itch) (EC 6.3.2.-) (Atrophin-1-interacting protein 4) (AIP4) (NFE2-associated polypeptide 1) (NAPP1)                                                                   | 103 kDa | 0.11  | 5    | 5    | 0   | 1   | 1   | 3   | 0   | 0  | 0  | 0   | 0  | - | 4.4661390 | 95% (0.042)    |
| HMCS1_HUMAN (+2)  | RTN2_HUMAN   | RTN2     | O75298 | Reticulon-2 (Neuroendocrine-specific protein-like 1) (NSP-like protein 1) (Neuroendocrine-specific protein-like I) (NSP-like protein I) (NSPLI)                                                                   | 59 kDa  | 0.046 | 5    | 5    | 0   | 3   | 0   | 0   | 2   | 0  | 0  | 0   | 0  | - | 4.4661390 | 95% (0.042)    |
| DDAH2_HUMAN       | B7Z7E4_HUMAN |          | B7Z7E4 | cDNA FLJ53675, highly similar to Homo sapiens LETM1 domain containing 1 (LETMD1), transcript variant 1, mRNA                                                                                                      | 31 kDa  | 0.18  | 4    | 5    | 0   | 2   | 0   | 0   | 3   | 0  | 0  | 0   | 0  | - | 4.4661390 | 95% (0.042)    |
| A8KOC9_HUMAN (+1) | Q53GD8_HUMAN |          | Q53GD8 | Peptidyl-prolyl cis-trans isomerase (Fragment)                                                                                                                                                                    | 25 kDa  | 0.17  | 5    | 5    | 0   | 0   | 1   | 0   | 4   | 0  | 0  | 0   | 0  | - | 4.4661390 | 95% (0.042)    |
| PHS_HUMAN (+1)    | Q9Y3E8_HUMAN | C17orf25 | Q9Y3E8 | CGI-150 protein                                                                                                                                                                                                   | 55 kDa  | 0.25  | 5    | 5    | 0   | 0   | 2   | 1   | 2   | 0  | 0  | 0   | 0  | - | 4.4661390 | 95% (0.042)    |
| B4E2A3_HUMAN      | B7Z4C3_HUMAN |          | B7Z4C3 | cDNA FLJ50805, highly similar to Erythrocyte membrane protein band 4.2                                                                                                                                            | 77 kDa  | 0.18  | 5    | 5    | 0   | 0   | 4   | 1   | 0   | 0  | 0  | 0   | 0  | - | 4.4661390 | 95% (0.042)    |
| B4DMK2_HUMAN      | B7Z7Y3_HUMAN |          | B7Z7Y3 | cDNA FLJ61618, highly similar to Discoidin, CUB and LCCL domain-containing protein 2                                                                                                                              | 74 kDa  | 0.071 | 5    | 5    | 0   | 5   | 0   | 0   | 0   | 0  | 0  | 0   | 0  | - | 4.4661390 | 95% (0.042)    |
| B7Z2F7_HUMAN (+1) | B2R880_HUMAN |          | B2R880 | cDNA, FLJ93778, highly similar to Homo sapiens CD38 antigen (p45) (CD38), mRNA                                                                                                                                    | 34 kDa  | 0.039 | 5    | 5    | 0   | 0   | 0   | 0   | 5   | 0  | 0  | 0   | 0  | - | 4.4661390 | 95% (0.042)    |
| ETUD1_HUMAN       | B2RAY1_HUMAN |          | B2RAY1 | cDNA, FLJ95184, highly similar to Homo sapiens signal transducing adaptor molecule (SH3 domain and ITAM motif) 1 (STAM), mRNA                                                                                     | 59 kDa  | 0.026 | 5    | 5    | 0   | 1   | 1   | 3   | 0   | 0  | 0  | 0   | 0  | - | 4.4661390 | 95% (0.042)    |
| B2RAU6_HUMAN      | OSB11_HUMAN  | OSBPL11  | Q9BXB4 | Oxysterol-binding protein-related protein 11 (ORP-11) (OSBP-related protein 11)                                                                                                                                   | 84 kDa  | 0.048 | 5    | 5    | 0   | 1   | 1   | 2   | 1   | 0  | 0  | 0   | 0  | - | 4.4661390 | 95% (0.042)    |



|                   |              |          |        |                                                                                                                                                                                            |         |       |    |    |   |    |   |    |    |   |   |   |   |   |             |                 |
|-------------------|--------------|----------|--------|--------------------------------------------------------------------------------------------------------------------------------------------------------------------------------------------|---------|-------|----|----|---|----|---|----|----|---|---|---|---|---|-------------|-----------------|
| CASP6_HUMAN       | C9K0W8_HUMAN | STX16    | C9K0W8 | Syntaxin-16 (Uncharacterized protein)                                                                                                                                                      | 35 kDa  | 0.13  | 5  | 5  | 0 | 3  | 1 | 1  | 0  | 0 | 0 | 0 | 0 | 0 | 4.466139016 | 95% (0.042)     |
| Q56FN6_HUMAN      | SPRY7_HUMAN  | SPRYD7   | Q5W111 | SPRY domain-containing protein 7 (Chronic lymphocytic leukemia deletion region gene 6 protein) (CLL deletion region gene 6 protein)                                                        | 22 kDa  | 0.24  | 5  | 5  | 0 | 4  | 1 | 0  | 0  | 0 | 0 | 0 | 0 | 0 | 4.466139016 | 95% (0.042)     |
| CTBP2_HUMAN (+2)  | PLPL4_HUMAN  | PNPLA4   | P41247 | Patatin-like phospholipase domain-containing protein 4 (EC 3.1.1.3) (Protein GS2)                                                                                                          | 28 kDa  | 0.029 | 5  | 5  | 0 | 4  | 0 | 1  | 0  | 0 | 0 | 0 | 0 | 0 | 4.466139016 | 95% (0.042)     |
| CBL_HUMAN         | VATF_HUMAN   | ATP6V1F  | Q16864 | V-type proton ATPase subunit F (V-ATPase subunit F) (V-ATPase 14 kDa subunit) (Vacuolar proton pump subunit F)                                                                             | 13 kDa  | 0.029 | 5  | 5  | 0 | 1  | 1 | 1  | 2  | 0 | 0 | 0 | 0 | 0 | 4.466139016 | 95% (0.042)     |
| A8K097_HUMAN (+1) | B2ZGL7_HUMAN | MGLL     | B2ZGL7 | Monoacylglycerol lipase isoform 2                                                                                                                                                          | 30 kDa  | 0.058 | 5  | 5  | 0 | 4  | 1 | 0  | 0  | 0 | 0 | 0 | 0 | 0 | 4.466139016 | 95% (0.042)     |
| B7Z6C9_HUMAN (+1) | EXOS4_HUMAN  | EXOSC4   | Q9NPD3 | Exosome complex component RRP41 (Exosome component 4) (Ribosomal RNA-processing protein 41) (p12A)                                                                                         | 26 kDa  | 0.036 | 5  | 5  | 0 | 0  | 3 | 0  | 2  | 0 | 0 | 0 | 0 | 0 | 4.466139016 | 95% (0.042)     |
| MGME1_HUMAN       | RB27B_HUMAN  | RAB27B   | O00194 | Ras-related protein Rab-27B (C25KG)                                                                                                                                                        | 25 kDa  | 0.087 | 11 | 10 | 1 | 7  | 1 | 2  | 0  | 0 | 0 | 1 | 0 | 0 | 4.466361706 | 95% (0.0098)    |
| XCT_HUMAN         | PERM_HUMAN   | MPO      | P05164 | Myeloperoxidase (MPO) (EC 1.11.2.2) [Cleaved into: Myeloperoxidase: 89 kDa myeloperoxidase; 84 kDa myeloperoxidase; Myeloperoxidase light chain; Myeloperoxidase heavy chain]              | 84 kDa  | 0.058 | 29 | 25 | 4 | 12 | 0 | 0  | 13 | 0 | 1 | 3 | 0 | 0 | 4.467029948 | 95% (0.00017)   |
| ATLA1_HUMAN (+2)  | B2RMN7_HUMAN | SPTB     | B2RMN7 | Spectrin, beta, erythrocytic                                                                                                                                                               | 247 kDa | 0.041 | 18 | 16 | 2 | 0  | 6 | 10 | 0  | 1 | 0 | 0 | 0 | 0 | 4.741512088 | 95% (0.0015)    |
| PPA6_HUMAN        | CACP_HUMAN   | CRAT     | P43155 | Carnitine O-acetyltransferase (Carnitine acetylase) (EC 2.3.1.7) (Carnitine acetyltransferase) (CrAT)                                                                                      | 71 kDa  | 0.054 | 12 | 11 | 1 | 1  | 1 | 5  | 4  | 0 | 1 | 0 | 0 | 0 | 4.863434128 | 95% (0.0056)    |
| A8K2S1_HUMAN      | ES8L1_HUMAN  | EPS8L1   | Q8TE68 | Epidermal growth factor receptor kinase substrate 8-like protein 1 (EPS8-like protein 1) (Epidermal growth factor receptor pathway substrate 8-related protein 1) (EPS8-related protein 1) | 80 kDa  | 0.036 | 12 | 11 | 1 | 11 | 0 | 0  | 1  | 0 | 0 | 0 | 0 | 2 | 4.863434128 | 95% (0.0056)    |
| MP2K3_HUMAN (+2)  | TRFM_HUMAN   | MFI2     | P08582 | Melanotransferrin (Melanoma-associated antigen p97) (CD antigen CD228)                                                                                                                     | 80 kDa  | 0.092 | 12 | 11 | 1 | 6  | 3 | 2  | 0  | 0 | 0 | 1 | 0 | 0 | 4.863434128 | 95% (0.0056)    |
| ARMC9_HUMAN (+2)  | A8K8G0_HUMAN | HDGF     | A8K8G0 | Hepatitis-derived growth factor (cDNA FLJ75113)                                                                                                                                            | 23 kDa  | 0.024 | 33 | 29 | 4 | 4  | 6 | 8  | 11 | 0 | 2 | 0 | 2 | 0 | 5.147984872 | 95% (< 0.00010) |
| C9JSC3_HUMAN (+1) | CTBP1_HUMAN  | CTBP1    | Q13363 | C-terminal-binding protein 1 (CtBP1) (EC 1.1.1.-)                                                                                                                                          | 48 kDa  | 0.063 | 6  | 6  | 0 | 0  | 1 | 3  | 2  | 0 | 0 | 0 | 0 | 0 | 5.180787824 | 95% (0.022)     |
| EIF1_HUMAN (+1)   | A2BDK6_HUMAN | MAP1B    | A2BDK6 | Microtubule-associated protein 1B (Microtubule-associated protein 1B, isoform CRA_a)                                                                                                       | 257 kDa | 0.29  | 6  | 6  | 0 | 2  | 1 | 3  | 0  | 0 | 0 | 0 | 0 | 0 | 5.180787824 | 95% (0.022)     |
| B4DMD3_HUMAN (+3) | B7ZKT9_HUMAN | KIAA1033 | B7ZKT9 | KIAA1033 protein                                                                                                                                                                           | 137 kDa | 0.036 | 5  | 6  | 0 | 5  | 0 | 0  | 1  | 0 | 0 | 0 | 0 | 0 | 5.180787824 | 95% (0.022)     |
| SLAF8_HUMAN       | E5KNQ5_HUMAN | TK2      | E5KNQ5 | Mitochondrial thymidine kinase 2 (Thymidine kinase 2, mitochondrial) (Thymidine kinase 2, mitochondrial, isoform CRA_e)                                                                    | 35 kDa  | 0.11  | 6  | 6  | 0 | 2  | 2 | 1  | 1  | 0 | 0 | 0 | 0 | 0 | 5.180787824 | 95% (0.022)     |
| GATC_HUMAN (+1)   | E7ET76_HUMAN | GGT1     | E7ET76 | Gamma-glutamyltranspeptidase 1 light chain (Fragment)                                                                                                                                      | 50 kDa  | 0.19  | 6  | 6  | 0 | 3  | 1 | 2  | 0  | 0 | 0 | 0 | 0 | 0 | 5.180787824 | 95% (0.022)     |
| AAK1_HUMAN (+4)   | GP110_HUMAN  | GPR110   | Q5T601 | Probable G-protein coupled receptor 110 (G-protein coupled receptor KPG_012) (G-protein coupled receptor PGR19)                                                                            | 101 kDa | 0.028 | 6  | 6  | 0 | 4  | 0 | 0  | 2  | 0 | 0 | 0 | 0 | 0 | 5.180787824 | 95% (0.022)     |
| E9PGT3_HUMAN (+2) | C9JSS0_HUMAN | STEAP4   | C9JSS0 | Metalloreductase STEAP4 (Uncharacterized protein)                                                                                                                                          | 39 kDa  | 0.062 | 6  | 6  | 0 | 0  | 2 | 1  | 3  | 0 | 0 | 0 | 0 | 0 | 5.180787824 | 95% (0.022)     |

|                   |              |         |        |                                                                                                                                                                                                                                                                                                                                   |         |       |     |     |    |    |    |    |    |    |   |   |   |                      |                        |                        |
|-------------------|--------------|---------|--------|-----------------------------------------------------------------------------------------------------------------------------------------------------------------------------------------------------------------------------------------------------------------------------------------------------------------------------------|---------|-------|-----|-----|----|----|----|----|----|----|---|---|---|----------------------|------------------------|------------------------|
| HID1_HUMAN        | LAMC2_HUMAN  | LAMC2   | Q13753 | Laminin subunit gamma-2 (Cell-scattering factor 140 kDa subunit) (CSF 140 kDa subunit) (Epligrin subunit gamma) (Kalinin subunit gamma) (Kalinin/nicein/epiligrin 100 kDa subunit) (Ladisin 140 kDa subunit) (Laminin B2t chain) (Laminin-5 subunit gamma) (Large adhesive scatter factor 140 kDa subunit) (Nicein subunit gamma) | 131 kDa | 0.049 | 34  | 30  | 4  | 4  | 12 | 14 | 0  | 0  | 0 | 0 | 0 | 3                    | -<br>5.3182345<br>44   | 95% (<<br>0.00010<br>) |
| SSH3_HUMAN        | IFIT2_HUMAN  | IFIT2   | P09913 | Interferon-induced protein with tetra-ricopeptide repeats 2 (IFIT-2) (ISG-54 k) (Interferon-induced 54 kDa protein) (IFL-54K) (P54)                                                                                                                                                                                               | 55 kDa  | 0.036 | 14  | 13  | 1  | 0  | 0  | 0  | 13 | 0  | 1 | 0 | 0 | 0                    | -<br>5.6576095<br>86   | 95% (0.0018<br>)       |
| F127A_HUMAN       | HMGB2_HUMAN  | HMGB2   | P26583 | High mobility group protein B2 (High mobility group protein 2) (HMG-2)                                                                                                                                                                                                                                                            | 24 kDa  | 0.23  | 14  | 13  | 1  | 0  | 1  | 3  | 7  | 1  | 0 | 0 | 0 | 0                    | -<br>5.6576095<br>86   | 95% (0.0018<br>)       |
| VAMP8_HUMAN       | B3KUB6_HUMAN |         | B3KUB6 | cDNA FLJ39529 fis, clone PUAEN2004067, highly similar to Band 4.1-like protein 1                                                                                                                                                                                                                                                  | 86 kDa  | 0.24  | 22  | 20  | 2  | 1  | 5  | 8  | 6  | 0  | 1 | 0 | 1 | -<br>5.8412934<br>06 | 95% (0.0001<br>7)      |                        |
| CAMP_HUMAN (+1)   | DHRS1_HUMAN  | DHRS1   | Q96LJ7 | Dehydrogenase/reductase SDR family member 1 (EC 1.1.-.-)                                                                                                                                                                                                                                                                          | 34 kDa  | 0.059 | 7   | 7   | 0  | 3  | 0  | 0  | 4  | 0  | 0 | 0 | 0 | -<br>5.8954549<br>98 | 95% (0.012)            |                        |
| GGCT_HUMAN        | MYO5C_HUMAN  | MYO5C   | Q9NQX4 | Unconventional myosin-Vc                                                                                                                                                                                                                                                                                                          | 203 kDa | 0.11  | 7   | 7   | 0  | 7  | 0  | 0  | 0  | 0  | 0 | 0 | 0 | -<br>5.8954549<br>98 | 95% (0.012)            |                        |
| RB22A_HUMAN       | IPRI_HUMAN   | ITPRIP  | Q8IWB1 | Inositol 1,4,5-trisphosphate receptor-interacting protein (Protein DANGER)                                                                                                                                                                                                                                                        | 62 kDa  | 0.26  | 7   | 7   | 0  | 6  | 0  | 0  | 1  | 0  | 0 | 0 | 0 | -<br>5.8954549<br>98 | 95% (0.012)            |                        |
| F8VWL0_HUMAN (+1) | ATP9A_HUMAN  | ATP9A   | O75110 | Probable phospholipid-transporting ATPase IIA (EC 3.6.3.1) (ATPase class II type 9A)                                                                                                                                                                                                                                              | 119 kDa | 0.073 | 7   | 7   | 0  | 7  | 0  | 0  | 0  | 0  | 0 | 0 | 0 | -<br>5.8954549<br>98 | 95% (0.012)            |                        |
| NDUB1_HUMAN       | E9PDY6_HUMAN | MUC4    | E9PDY6 | Mucin-4 beta chain                                                                                                                                                                                                                                                                                                                | 542 kDa | 0.16  | 7   | 7   | 0  | 6  | 1  | 0  | 0  | 0  | 0 | 0 | 0 | -<br>5.8954549<br>98 | 95% (0.012)            |                        |
| ARFRP_HUMAN (+2)  | B4DYN8_HUMAN |         | B4DYN8 | cDNA FLJ56519, highly similar to Interferon-induced protein 44                                                                                                                                                                                                                                                                    | 47 kDa  | 0.14  | 7   | 7   | 0  | 0  | 0  | 0  | 7  | 0  | 0 | 0 | 0 | -<br>5.8954549<br>98 | 95% (0.012)            |                        |
| C9J712_HUMAN (+1) | RRAGA_HUMAN  | RRAGA   | Q7L523 | Ras-related GTP-binding protein A (Rag A) (RagA) (Adenovirus E3 14.7 kDa-interacting protein 1) (FIP-1)                                                                                                                                                                                                                           | 37 kDa  | 0.23  | 7   | 7   | 0  | 1  | 1  | 3  | 2  | 0  | 0 | 0 | 0 | -<br>5.8954549<br>98 | 95% (0.012)            |                        |
| RPR1A_HUMAN       | K7EKI8_HUMAN | PPL     | K7EKI8 | Periplakin                                                                                                                                                                                                                                                                                                                        | 204 kDa | 0.14  | 211 | 187 | 25 | 98 | 25 | 18 | 42 | 11 | 0 | 7 | 7 | -<br>6.4184249<br>93 | 95% (<<br>0.00010<br>) |                        |
| CD59_HUMAN (+2)   | E7ET40_HUMAN | PLAU    | E7ET40 | Urokinase-type plasminogen activator chain B                                                                                                                                                                                                                                                                                      | 47 kDa  | 0.19  | 8   | 8   | 0  | 8  | 0  | 0  | 0  | 0  | 0 | 0 | 0 | -<br>6.6101405<br>37 | 95% (0.0062<br>)       |                        |
| DCAKD_HUMAN (+1)  | DPP2_HUMAN   | DPP7    | Q9UHL4 | Dipeptidyl peptidase 2 (EC 3.4.14.2) (Dipeptidyl aminopeptidase II) (Dipeptidyl peptidase 7) (Dipeptidyl peptidase II) (DPP II) (Quiescent cell proline dipeptidase)                                                                                                                                                              | 54 kDa  | 0.11  | 8   | 8   | 0  | 3  | 3  | 0  | 2  | 0  | 0 | 0 | 0 | -<br>6.6101405<br>37 | 95% (0.0062<br>)       |                        |
| D6REB4_HUMAN (+1) | DECR2_HUMAN  | DECR2   | Q9NUI1 | Peroxisomal 2,4-dienoyl-CoA reductase (pDCR) (EC 1.3.1.34) (2,4-dienoyl-CoA reductase 2)                                                                                                                                                                                                                                          | 31 kDa  | 0.057 | 8   | 8   | 0  | 4  | 0  | 0  | 4  | 0  | 0 | 0 | 0 | -<br>6.6101405<br>37 | 95% (0.0062<br>)       |                        |
| G3ST2_HUMAN       | TM192_HUMAN  | TMEM192 | Q8IY95 | Transmembrane protein 192                                                                                                                                                                                                                                                                                                         | 31 kDa  | 0.053 | 8   | 8   | 0  | 4  | 3  | 1  | 0  | 0  | 0 | 0 | 0 | -<br>6.6101405<br>37 | 95% (0.0062<br>)       |                        |
| FGFP1_HUMAN       | GIMA1_HUMAN  | GIMAP1  | Q8WWP7 | GTPase IMAF family member 1 (Immunity-associated protein 1) (GIMAP1)                                                                                                                                                                                                                                                              | 34 kDa  | 0.11  | 8   | 8   | 0  | 0  | 2  | 2  | 3  | 0  | 0 | 0 | 0 | -<br>6.6101405<br>37 | 95% (0.0062<br>)       |                        |
| A6ND99_HUMAN (+2) | TRPM4_HUMAN  | TRPM4   | Q8TD43 | Transient receptor potential cation channel subfamily M member 4 (hTRPM4) (Calcium-activated non-selective cation channel 1) (Long transient receptor potential channel 4) (LTrpC-4) (LTrpC4) (Melastatin-4)                                                                                                                      | 134 kDa | 0.065 | 8   | 8   | 0  | 8  | 0  | 0  | 0  | 0  | 0 | 0 | 0 | -<br>6.6101405<br>37 | 95% (0.0062<br>)       |                        |

|                      |                     |         |        |                                                                                                                                                                                 |         |       |    |    |   |    |    |    |   |   |   |   |   |   |             |                 |              |
|----------------------|---------------------|---------|--------|---------------------------------------------------------------------------------------------------------------------------------------------------------------------------------|---------|-------|----|----|---|----|----|----|---|---|---|---|---|---|-------------|-----------------|--------------|
| B0S7V1_HUMAN (+6)    | B4DMR3_HUMAN AN     |         | B4DMR3 | cDNA FLJ51896, highly similar to Glia-derived nexin                                                                                                                             | 37 kDa  | 0.086 | 8  | 8  | 0 | 1  | 3  | 4  | 0 | 0 | 0 | 0 | 0 | 0 | 0           | 6.610140537     | 95% (0.0062) |
| Q860I7_HUMAN N       | G3V207_HUMAN N      | TMCC3   | G3V207 | Transmembrane and coiled-coil domain family 3, isoform CRA_c (Transmembrane and coiled-coil domains protein 3)                                                                  | 50 kDa  | 0.31  | 8  | 8  | 0 | 8  | 0  | 0  | 0 | 0 | 0 | 0 | 0 | 0 | 0           | 6.610140537     | 95% (0.0062) |
| DOPP1_HUMAN N        | ANR22_HUMAN N       | ANKRD22 | Q5VYY1 | Ankyrin repeat domain-containing protein 22                                                                                                                                     | 22 kDa  | 0.084 | 8  | 8  | 0 | 2  | 0  | 1  | 5 | 0 | 0 | 0 | 0 | 0 | 6.610140537 | 95% (0.0062)    |              |
| BSPRY_HUMAN N        | B2RC75_HUMAN N      |         | B2RC75 | Transmembrane channel-like protein                                                                                                                                              | 79 kDa  | 0.062 | 8  | 8  | 0 | 3  | 0  | 0  | 5 | 0 | 0 | 0 | 0 | 0 | 6.610140537 | 95% (0.0062)    |              |
| PYRG2_HUMAN N        | B4DKB2_HUMAN AN     | ECE1    | B4DKB2 | Endothelin-converting enzyme 1 (cDNA FLJ59212, highly similar to Endothelin-converting enzyme 1 (EC 3.4.24.71))                                                                 | 84 kDa  | 0.048 | 42 | 38 | 4 | 11 | 13 | 15 | 0 | 3 | 0 | 1 | 0 | 0 | 6.680389479 | 95% (< 0.00010) |              |
| B2RAH2_HUMAN AN (+1) | GSTM4_HUMAN AN (+1) | GSTM4   | Q03013 | Glutathione S-transferase Mu 4 (EC 2.5.1.18) (GST class-mu 4) (GST-Mu2) (GSTM4-4)                                                                                               | 26 kDa  | 0.017 | 10 | 9  | 0 | 0  | 2  | 0  | 7 | 0 | 0 | 0 | 0 | 0 | 7.324844443 | 95% (0.0033)    |              |
| A5D8Z7_HUMAN N (+1)  | NCALD_HUMAN N       | NCALD   | P61601 | Neurocalcin-delta                                                                                                                                                               | 22 kDa  | 0.017 | 12 | 9  | 0 | 4  | 0  | 0  | 2 | 0 | 0 | 0 | 0 | 0 | 7.324844443 | 95% (0.0033)    |              |
| B2RDGI_HUMAN AN (+3) | INADL_HUMAN N       | INADL   | Q8NI35 | InaD-like protein (Inadl protein) (hINADL) (Pals1-associated tight junction protein) (Protein associated to tight junctions)                                                    | 196 kDa | 0.025 | 10 | 10 | 0 | 9  | 0  | 0  | 1 | 0 | 0 | 0 | 0 | 0 | 8.039566716 | 95% (0.0017)    |              |
| GRPE2_HUMAN N (+1)   | J3QRN6_HUMAN N      | MYO1D   | J3QRN6 | Unconventional myosin-Id                                                                                                                                                        | 111 kDa | 0.12  | 10 | 10 | 0 | 10 | 0  | 0  | 0 | 0 | 0 | 0 | 0 | 0 | 8.039566716 | 95% (0.0017)    |              |
| ELP1_HUMAN (+2)      | PRG2_HUMAN          | PRG2    | P13727 | Bone marrow proteoglycan (BMPG) (Proteoglycan 2) [Cleaved into: Eosinophil granule major basic protein (EMBP) (MBP) (Pregnancy-associated major basic protein)]                 | 25 kDa  | 0.029 | 10 | 10 | 0 | 4  | 0  | 0  | 6 | 0 | 0 | 0 | 0 | 0 | 8.039566716 | 95% (0.0017)    |              |
| B4DRC8_HUMAN N (+1)  | B4DZS8_HUMAN N      |         | B4DZS8 | Peptidyl-prolyl cis-trans isomerase (Fragment)                                                                                                                                  | 98 kDa  | 0.075 | 10 | 10 | 0 | 0  | 4  | 6  | 0 | 0 | 0 | 0 | 0 | 0 | 8.039566716 | 95% (0.0017)    |              |
| VPS25_HUMAN          | CB054_HUMAN         | C2orf54 | Q08A18 | Uncharacterized protein C2orf54                                                                                                                                                 | 50 kDa  | 0.13  | 10 | 10 | 0 | 3  | 0  | 0  | 7 | 0 | 0 | 0 | 0 | 0 | 8.039566716 | 95% (0.0017)    |              |
| G3V145_HUMAN N (+1)  | E9PSH2_HUMAN N      | CD55    | E9PSH2 | Complement decay-accelerating factor                                                                                                                                            | 41 kDa  | 0.082 | 10 | 10 | 0 | 2  | 4  | 4  | 0 | 0 | 0 | 0 | 0 | 0 | 8.039566716 | 95% (0.0017)    |              |
| A6XNE0_HUMAN AN (+6) | B7ZB83_HUMAN N      |         | B7ZB83 | cDNA, FLJ79447, highly similar to Nucleosome assembly protein 1-like 4                                                                                                          | 44 kDa  | 0.16  | 13 | 10 | 0 | 0  | 5  | 5  | 0 | 0 | 0 | 0 | 0 | 0 | 8.039566716 | 95% (0.0017)    |              |
| B2R533_HUMAN N (+7)  | IGHG2_HUMAN         | IGHG2   | P01859 | Ig gamma-2 chain C region                                                                                                                                                       | 36 kDa  | 0.12  | 10 | 10 | 0 | 0  | 0  | 0  | 6 | 0 | 0 | 0 | 0 | 0 | 8.039566716 | 95% (0.0017)    |              |
| B2R7K1_HUMAN N (+1)  | PTGIS_HUMAN         | PTGIS   | Q16647 | Prostacyclin synthase (EC 5.3.99.4) (Prostaglandin I2 synthase)                                                                                                                 | 57 kDa  | 0.067 | 43 | 40 | 3 | 35 | 0  | 0  | 5 | 0 | 0 | 0 | 0 | 3 | 8.673090159 | 95% (< 0.00010) |              |
| B3KRF9_HUMAN N (+1)  | PADI2_HUMAN         | PADI2   | Q9Y2J8 | Protein-arginine deiminase type-2 (EC 3.5.3.15) (PAD-H19) (Peptidylarginine deiminase II) (Protein-arginine deiminase type II)                                                  | 76 kDa  | 0.1   | 11 | 11 | 0 | 0  | 5  | 6  | 0 | 0 | 0 | 0 | 0 | 0 | 8.754307357 | 95% (0.00091)   |              |
| PLCE_HUMAN (+1)      | F6M9T7_HUMAN N      | IDO1    | F6M9T7 | Indolamine 2,3 dioxygenase (EC 1.13.11.52)                                                                                                                                      | 45 kDa  | 0.08  | 11 | 11 | 0 | 0  | 6  | 5  | 0 | 0 | 0 | 0 | 0 | 0 | 8.754307357 | 95% (0.00091)   |              |
| G3V4W4_HUMAN AN (+1) | PGH2_HUMAN          | PTGS2   | P35354 | Prostaglandin G/H synthase 2 (EC 1.14.99.1) (Cyclooxygenase-2) (COX-2) (PHS II) (Prostaglandin H2 synthase 2) (PGH synthase 2) (PGHS-2) (Prostaglandin-endoperoxide synthase 2) | 69 kDa  | 0.18  | 13 | 11 | 0 | 2  | 6  | 3  | 0 | 0 | 0 | 0 | 0 | 0 | 8.754307357 | 95% (0.00091)   |              |
| PCH2_HUMAN           | PTBP3_HUMAN         | PTBP3   | O95758 | Polypyrimidine tract-binding protein 3 (Regulator of differentiation 1) (Rd1)                                                                                                   | 60 kDa  | 0.06  | 23 | 12 | 0 | 0  | 4  | 0  | 3 | 0 | 0 | 0 | 0 | 0 | 9.469066366 | 95% (0.00048)   |              |
| WDR82_HUMAN N        | ASK2T7_HUMAN N      |         | ASK2T7 | cDNA FLJ76780, highly similar to Homo sapiens epidermal growth factor receptor (erythroblastic                                                                                  | 134 kDa | 0.08  | 37 | 35 | 2 | 10 | 12 | 12 | 1 | 1 | 0 | 1 | 0 | 0 | 9.966480545 | 95% (< 0.00010) |              |

|                   |              |        |        |                                                                                                                                                                                                             |         |       |     |    |   |    |    |    |    |   |   |   |   |   |   |   |              |                |
|-------------------|--------------|--------|--------|-------------------------------------------------------------------------------------------------------------------------------------------------------------------------------------------------------------|---------|-------|-----|----|---|----|----|----|----|---|---|---|---|---|---|---|--------------|----------------|
|                   |              |        |        | leukemia viral (v-erb-b) oncogene homolog, avian) (EGFR), transcript variant 1                                                                                                                              |         |       |     |    |   |    |    |    |    |   |   |   |   |   |   |   |              |                |
| B8K1J4_HUMAN (+1) | A8K7T0_HUMAN |        | A8K7T0 | Kynureninase (EC 3.7.1.3)                                                                                                                                                                                   | 52 kDa  | 0.13  | 13  | 13 | 0 | 0  | 6  | 8  | 0  | 0 | 0 | 0 | 0 | 0 | 0 | 0 | -10.18384374 | 95% (0.00026)  |
| ALG9_HUMAN (+3)   | LY75_HUMAN   | LY75   | O60449 | Lymphocyte antigen 75 (Ly-75) (C-type lectin domain family 13 member B) (DEC-205) (gp200-MR6) (CD antigen CD205)                                                                                            | 198 kDa | 0.047 | 14  | 14 | 0 | 1  | 4  | 9  | 0  | 0 | 0 | 0 | 0 | 0 | 0 | 0 | -10.89863949 | 95% (0.00014)  |
| MZB1_HUMAN        | MYO5B_HUMAN  | MYO5B  | Q9ULV0 | Unconventional myosin-Vb                                                                                                                                                                                    | 214 kDa | 0.13  | 14  | 14 | 0 | 12 | 2  | 0  | 0  | 0 | 0 | 0 | 0 | 0 | 0 | 0 | -10.89863949 | 95% (0.00014)  |
| F8WCD0_HUMAN (+1) | F13A_HUMAN   | F13A1  | P00488 | Coagulation factor XIII A chain (Coagulation factor XIIIa) (EC 2.3.2.13) (Protein-glutamine gamma-glutamyltransferase A chain) (Transglutaminase A chain)                                                   | 83 kDa  | 0.055 | 14  | 14 | 0 | 0  | 4  | 10 | 0  | 0 | 0 | 0 | 0 | 0 | 0 | 0 | -10.89863949 | 95% (0.00014)  |
| OSBL2_HUMAN       | CDCP1_HUMAN  | CDCP1  | Q9H5V8 | CUB domain-containing protein 1 (Membrane glycoprotein gp140) (Subtractive immunization M plus HEp3-associated 135 kDa protein) (SMA135) (Transmembrane and associated with src kinases) (CD antigen CD318) | 93 kDa  | 0.073 | 14  | 14 | 0 | 1  | 6  | 7  | 0  | 0 | 0 | 0 | 0 | 0 | 0 | 0 | -10.89863949 | 95% (0.00014)  |
| B2RE38_HUMAN (+2) | AHNK2_HUMAN  | AHNAK2 | Q8IVF2 | Protein AHNAK2                                                                                                                                                                                              | 617 kDa | 0.028 | 15  | 15 | 0 | 15 | 0  | 0  | 0  | 0 | 0 | 0 | 0 | 0 | 0 | 0 | -11.61345361 | 95% (<0.00010) |
| CDS1_HUMAN        | B4DYU3_HUMAN |        | B4DYU3 | cDNA FLJ57235, highly similar to Aldehyde dehydrogenase 1A3 (EC 1.2.1.5)                                                                                                                                    | 49 kDa  | 0.043 | 45  | 42 | 2 | 11 | 16 | 16 | 0  | 0 | 0 | 2 | 0 | 0 | 0 | 0 | -11.8921123  | 95% (<0.00010) |
| A5D8W8_HUMAN (+1) | SPTA1_HUMAN  | SPTA1  | P02549 | Spectrin alpha chain, erythrocytic 1 (Erythroid alpha-spectrin)                                                                                                                                             | 280 kDa | 0.042 | 16  | 16 | 0 | 0  | 5  | 11 | 0  | 0 | 0 | 0 | 0 | 0 | 0 | 0 | -12.3282861  | 95% (<0.00010) |
| B4E126_HUMAN (+3) | B7Z416_HUMAN | DHRS9  | B7Z416 | Dehydrogenase/reductase SDR family member 9 (cDNA FLJ55219, highly similar to Dehydrogenase/reductase SDR family member 9 (EC 1.1.1.-))                                                                     | 42 kDa  | 0.065 | 48  | 46 | 2 | 18 | 18 | 18 | 18 | 0 | 0 | 0 | 0 | 2 | 0 | 0 | -12.9926289  | 95% (<0.00010) |
| DUS23_HUMAN       | H0Y3C5_HUMAN | HCK    | H0Y3C5 | Tyrosine-protein kinase HCK                                                                                                                                                                                 | 60 kDa  | 0.13  | 28  | 19 | 0 | 2  | 2  | 2  | 2  | 0 | 0 | 0 | 0 | 0 | 0 | 0 | -14.47289381 | 95% (<0.00010) |
| F8VX04_HUMAN (+2) | B0QZ43_HUMAN | ERLIN1 | B0QZ43 | Erlin-1 (Fragment)                                                                                                                                                                                          | 31 kDa  | 0.038 | 23  | 19 | 0 | 7  | 4  | 3  | 0  | 0 | 0 | 0 | 0 | 0 | 0 | 0 | -14.47289381 | 95% (<0.00010) |
| PR38A_HUMAN       | MX2_HUMAN    | MX2    | P20592 | Interferon-induced GTP-binding protein Mx2 (Interferon-regulated resistance GTP-binding protein MxB) (Myxovirus resistance protein 2) (p78-related protein)                                                 | 82 kDa  | 0.09  | 39  | 28 | 0 | 0  | 0  | 3  | 22 | 0 | 0 | 0 | 0 | 0 | 0 | 0 | -20.90770921 | 95% (<0.00010) |
| TP4A2_HUMAN       | I6NXG5_HUMAN | HLA-C  | I6NXG5 | MHC class I antigen (Fragment)                                                                                                                                                                              | 21 kDa  | 0.14  | 64  | 42 | 0 | 0  | 11 | 7  | 16 | 0 | 0 | 0 | 0 | 0 | 0 | 0 | -30.92038153 | 95% (<0.00010) |
| B3KTNS_HUMAN (+2) | B7ZLH8_HUMAN | EVPL   | B7ZLH8 | EVPL protein                                                                                                                                                                                                | 234 kDa | 0.067 | 51  | 52 | 0 | 33 | 2  | 0  | 16 | 0 | 0 | 0 | 0 | 0 | 0 | 0 | -38.07449707 | 95% (<0.00010) |
| C9JFX4_HUMAN (+2) | Q860I7_HUMAN | HLA-B  | Q860I7 | MHC class I antigen                                                                                                                                                                                         | 40 kDa  | 0.022 | 116 | 75 | 0 | 0  | 20 | 0  | 25 | 0 | 0 | 0 | 0 | 0 | 0 | 0 | -54.53594588 | 95% (<0.00010) |

\*Obtained from UniProt (<http://www.uniprot.org/>) databases

<sup>a</sup>Spectral counts (SpC) in ALL datasets (CN and CR)

<sup>b</sup>Spectral counts (SpC) in CN datasets (combined)

<sup>c</sup>Spectral counts (SpC) in CR datasets (combined)

<sup>d</sup>Spectral count ratio (Rsc) between CR (combined) and CN (combined)

<sup>e</sup>Statistical significance (p-value) (Fisher's Exact Test)

**Table S3.** Proteins differentially expressed in CN and CR tumor cells.

| Uniprot Acc <sup>A</sup> | Gene Symbol <sup>A</sup> | Protein Description <sup>A</sup>                                                                                                                                             | CN_Combined <sup>C</sup> | CR_Combined <sup>D</sup> | CN_1 | CN_2 | CN_3 | CN_4 | CR_1 | CR_2 | CR_3 | CR_4 | RSC (CR / CN) <sup>E</sup> | p value <sup>F</sup> |
|--------------------------|--------------------------|------------------------------------------------------------------------------------------------------------------------------------------------------------------------------|--------------------------|--------------------------|------|------|------|------|------|------|------|------|----------------------------|----------------------|
| P23378                   | GLDC                     | Glycine dehydrogenase [decarboxylating], mitochondrial (EC 1.4.4.2) (Glycine cleavage system P protein) (Glycine decarboxylase)                                              | 0                        | 21                       | 0    | 0    | 0    | 0    | 20   | 0    | 0    | 2    | 19.9                       | 95% (< 0.00010)      |
| P21266                   | GSTM3                    | Glutathione S-transferase Mu 3 (EC 2.5.1.18) (GST class-mu 3) (GSTM3-3) (hGSTM3-3)                                                                                           | 0                        | 21                       | 0    | 0    | 0    | 0    | 3    | 14   | 4    | 0    | 19.9                       | 95% (< 0.00010)      |
| Q56FN6                   | HLA-DRB1                 | MHC class II antigen                                                                                                                                                         | 0                        | 16                       | 0    | 0    | 0    | 0    | 0    | 9    | 0    | 0    | 15.5                       | 95% (< 0.00010)      |
| Q13085                   | ACACA                    | Acetyl-CoA carboxylase 1 (ACCC1) (EC 6.4.1.2) (ACC-alpha) [Includes: Biotin carboxylase (EC 6.3.4.14)]                                                                       | 0                        | 13                       | 0    | 0    | 0    | 0    | 12   | 0    | 0    | 0    | 12.8                       | 95% (< 0.00010)      |
| Q99715                   | COL12A1                  | Collagen alpha-1(XII) chain                                                                                                                                                  | 1                        | 23                       | 0    | 0    | 1    | 0    | 12   | 1    | 6    | 4    | 12.1                       | 95% (< 0.00010)      |
| Q52NV4                   | HRS                      | Histidyl-tRNA synthetase                                                                                                                                                     | 0                        | 12                       | 0    | 0    | 0    | 0    | 6    | 0    | 2    | 0    | 11.9                       | 95% (0.00012)        |
| C9J837                   | RAB3GAP1                 | Rab3 GTPase-activating protein catalytic subunit                                                                                                                             | 0                        | 11                       | 0    | 0    | 0    | 0    | 0    | 9    | 2    | 0    | 11.0                       | 95% (0.00025)        |
| P08243                   | ASNS                     | Asparagine synthetase [glutamine-hydrolyzing] (EC 6.3.5.4) (Cell cycle control protein TS11) (Glutamine-dependent asparagine synthetase)                                     | 1                        | 20                       | 0    | 0    | 1    | 0    | 9    | 10   | 1    | 0    | 10.6                       | 95% (< 0.00010)      |
| P42771                   | CDKN2A                   | Cyclin-dependent kinase inhibitor 2A, isoforms 1/2/3 (Cyclin-dependent kinase 4 inhibitor A) (CDK4I) (Multiple tumor suppressor 1) (MTS-1) (p16-INK4a) (p16-INK4) (p16INK4A) | 0                        | 9                        | 0    | 0    | 0    | 0    | 3    | 6    | 0    | 0    | 9.2                        | 95% (0.0011)         |
| B4DF41                   | MSH6                     | DNA mismatch repair protein Msh6 (cDNA FLJ55677, highly similar to DNA mismatch repair protein MSH6)                                                                         | 0                        | 9                        | 0    | 0    | 0    | 0    | 8    | 0    | 1    | 0    | 9.2                        | 95% (0.0011)         |
| B3KMS0                   |                          | Condensin complex subunit 1                                                                                                                                                  | 0                        | 9                        | 0    | 0    | 0    | 0    | 8    | 0    | 1    | 0    | 9.2                        | 95% (0.0011)         |
| Q86YH3                   | EARS2                    | EARS2 protein                                                                                                                                                                | 0                        | 8                        | 0    | 0    | 0    | 0    | 1    | 0    | 2    | 4    | 8.3                        | 95% (0.0024)         |
| D6RE83                   | UCHL1                    | Ubiquitin carboxyl-terminal hydrolase isozyme L1                                                                                                                             | 0                        | 8                        | 0    | 0    | 0    | 0    | 0    | 5    | 3    | 0    | 8.3                        | 95% (0.0024)         |

|        |        |                                                                                                                                                                                                                                                                                                                                                                           |   |    |   |   |   |   |    |    |    |    |     |                 |
|--------|--------|---------------------------------------------------------------------------------------------------------------------------------------------------------------------------------------------------------------------------------------------------------------------------------------------------------------------------------------------------------------------------|---|----|---|---|---|---|----|----|----|----|-----|-----------------|
| Q04828 | AKR1C1 | Aldo-keto reductase family 1 member C1 (EC 1.1.1.-) (20-alpha-hydroxysteroid dehydrogenase) (20-alpha-HSD) (EC 1.1.1.149) (Chlordecone reductase homolog HAKRC) (Dihydrodiol dehydrogenase 1/2) (DD1/DD2) (High-affinity hepatic bile acid-binding protein) (HBAB) (Indanol dehydrogenase) (EC 1.1.1.112) (Trans-1,2-dihydrobenzene-1,2-diol dehydrogenase) (EC 1.3.1.20) | 0 | 7  | 0 | 0 | 0 | 0 | 0  | 6  | 1  | 0  | 7.4 | 95% (0.0051)    |
| P55285 | CDH6   | Cadherin-6 (Kidney cadherin) (K-cadherin)                                                                                                                                                                                                                                                                                                                                 | 0 | 7  | 0 | 0 | 0 | 0 | 4  | 0  | 1  | 2  | 7.4 | 95% (0.0051)    |
| P37268 | FDFT1  | Squalene synthase (SQS) (SS) (EC 2.5.1.21) (FPP:FPP farnesyltransferase) (Farnesyl-diphosphate farnesyltransferase)                                                                                                                                                                                                                                                       | 1 | 12 | 1 | 0 | 0 | 0 | 9  | 1  | 2  | 0  | 6.6 | 95% (0.00087)   |
| P36405 | ARL3   | ADP-ribosylation factor-like protein 3                                                                                                                                                                                                                                                                                                                                    | 0 | 6  | 0 | 0 | 0 | 0 | 1  | 4  | 1  | 0  | 6.5 | 95% (0.011)     |
| B4DIH5 | COPS2  | COP9 signalosome complex subunit 2 (cDNA FLJ52928, highly similar to COP9 signalosome complex subunit 2)                                                                                                                                                                                                                                                                  | 0 | 6  | 0 | 0 | 0 | 0 | 3  | 2  | 1  | 0  | 6.5 | 95% (0.011)     |
| D3DNT9 | EPHB3  | EPH receptor B3, isoform CRA_a                                                                                                                                                                                                                                                                                                                                            | 0 | 6  | 0 | 0 | 0 | 0 | 4  | 0  | 2  | 0  | 6.5 | 95% (0.011)     |
| P21397 | MAOA   | Amine oxidase [flavin-containing] A (EC 1.4.3.4) (Monoamine oxidase type A) (MAO-A)                                                                                                                                                                                                                                                                                       | 0 | 6  | 0 | 0 | 0 | 0 | 0  | 3  | 0  | 3  | 6.5 | 95% (0.011)     |
| Q14669 | TRIP12 | E3 ubiquitin-protein ligase TRIP12 (EC 6.3.2.-) (E3 ubiquitin-protein ligase for Arf) (ULF) (Thyroid receptor-interacting protein 12) (TR-interacting protein 12) (TRIP-12)                                                                                                                                                                                               | 0 | 6  | 0 | 0 | 0 | 0 | 2  | 0  | 4  | 0  | 6.5 | 95% (0.011)     |
| A8K984 |        | Structural maintenance of chromosomes protein                                                                                                                                                                                                                                                                                                                             | 0 | 6  | 0 | 0 | 0 | 0 | 4  | 0  | 1  | 0  | 6.5 | 95% (0.011)     |
| O60701 | UGDH   | UDP-glucose 6-dehydrogenase (UDP-Glc dehydrogenase) (UDP-GlcDH) (UDPGDH) (EC 1.1.1.22)                                                                                                                                                                                                                                                                                    | 3 | 23 | 1 | 1 | 1 | 0 | 2  | 15 | 6  | 0  | 6.4 | 95% (< 0.00010) |
| Q96C36 | PYCR2  | Pyrraline-5-carboxylate reductase 2 (P5C reductase 2) (P5CR 2) (EC 1.5.1.2)                                                                                                                                                                                                                                                                                               | 4 | 26 | 0 | 0 | 0 | 3 | 12 | 12 | 12 | 12 | 5.8 | 95% (< 0.00010) |
| Q9UKF6 | CPSF3  | Cleavage and polyadenylation specificity factor subunit 3 (EC 3.1.27.-) (Cleavage and polyadenylation specificity factor 73 kDa subunit) (CPSF 73 kDa subunit) (mRNA 3'-end-processing endonuclease CPSF-73)                                                                                                                                                              | 1 | 10 | 0 | 0 | 1 | 0 | 1  | 0  | 7  | 2  | 5.6 | 95% (0.0034)    |

|        |          |                                                                                                                                                                                                                                                                                                    |   |    |   |   |   |   |   |   |   |   |   |     |              |
|--------|----------|----------------------------------------------------------------------------------------------------------------------------------------------------------------------------------------------------------------------------------------------------------------------------------------------------|---|----|---|---|---|---|---|---|---|---|---|-----|--------------|
| B4DHQ3 |          | Phosphoserine aminotransferase (EC 2.6.1.52)                                                                                                                                                                                                                                                       | 1 | 10 | 0 | 0 | 0 | 0 | 1 | 5 | 4 | 1 | 0 | 5.6 | 95% (0.0034) |
| P11766 | ADH5     | Alcohol dehydrogenase class-3 (EC 1.1.1.1) (Alcohol dehydrogenase 5) (Alcohol dehydrogenase class chi chain) (Alcohol dehydrogenase class-III) (Glutathione-dependent formaldehyde dehydrogenase) (FALDH) (FDH) (GSH-FDH) (EC 1.1.1.-) (S-(hydroxymethyl)glutathione dehydrogenase) (EC 1.1.1.284) | 0 | 5  | 0 | 0 | 0 | 0 | 2 | 3 | 0 | 0 | 0 | 5.6 | 95% (0.023)  |
| B7ZMD7 | AMY1A    | Amylase, alpha 1A (Salivary)                                                                                                                                                                                                                                                                       | 0 | 5  | 0 | 0 | 0 | 0 | 0 | 5 | 0 | 0 | 0 | 5.6 | 95% (0.023)  |
| O14965 | AURKA    | Aurora kinase A (EC 2.7.11.1) (Aurora 2) (Aurora/IPL1-related kinase 1) (ARK-1) (Aurora-related kinase 1) (hARK1) (Breast tumor-amplified kinase) (Serine/threonine-protein kinase 15) (Serine/threonine-protein kinase 6) (Serine/threonine-protein kinase aurora-A)                              | 0 | 5  | 0 | 0 | 0 | 0 | 0 | 3 | 1 | 0 | 0 | 5.6 | 95% (0.023)  |
| Q96GD4 | AURKB    | Aurora kinase B (EC 2.7.11.1) (Aurora 1) (Aurora- and IPL1-like midbody-associated protein 1) (AIM-1) (Aurora/IPL1-related kinase 2) (ARK-2) (Aurora-related kinase 2) (STK-1) (Serine/threonine-protein kinase 12) (Serine/threonine-protein kinase 5) (Serine/threonine-protein kinase aurora-B) | 0 | 5  | 0 | 0 | 0 | 0 | 1 | 0 | 4 | 0 | 0 | 5.6 | 95% (0.023)  |
| O43708 | GSTZ1    | Maleylacetoacetate isomerase (MAAI) (EC 5.2.1.2) (GSTZ1-1) (Glutathione S-transferase zeta 1) (EC 2.5.1.18)                                                                                                                                                                                        | 0 | 5  | 0 | 0 | 0 | 0 | 2 | 1 | 2 | 0 | 0 | 5.6 | 95% (0.023)  |
| Q86Y56 | HEATR2   | HEAT repeat-containing protein 2                                                                                                                                                                                                                                                                   | 0 | 5  | 0 | 0 | 0 | 0 | 1 | 2 | 1 | 0 | 0 | 5.6 | 95% (0.023)  |
| Q68E01 | INTS3    | Integrator complex subunit 3 (Int3) (SOSS complex subunit A) (Sensor of single-strand DNA complex subunit A) (SOSS-A) (Sensor of ssDNA subunit A)                                                                                                                                                  | 0 | 5  | 0 | 0 | 0 | 0 | 1 | 1 | 2 | 1 | 0 | 5.6 | 95% (0.023)  |
| Q15397 | KIAA0020 | Pumilio domain-containing protein KIAA0020 (HBV X-transactivated gene 5 protein) (HBV XAg-transactivated protein 5) (Minor histocompatibility antigen HA-8) (HLA-HA8)                                                                                                                              | 0 | 5  | 0 | 0 | 0 | 0 | 2 | 2 | 1 | 0 | 0 | 5.6 | 95% (0.023)  |

|        |         |                                                                                                                                                                                                          |   |    |   |   |   |   |    |   |   |   |   |     |               |
|--------|---------|----------------------------------------------------------------------------------------------------------------------------------------------------------------------------------------------------------|---|----|---|---|---|---|----|---|---|---|---|-----|---------------|
| E7ESY4 | MTA1    | Metastasis-associated protein MTA1                                                                                                                                                                       | 0 | 5  | 0 | 0 | 0 | 0 | 0  | 1 | 0 | 3 | 0 | 5.6 | 95% (0.023)   |
| Q9Y263 | PLAA    | Phospholipase A-2-activating protein (PLA2P) (PLAP)                                                                                                                                                      | 0 | 5  | 0 | 0 | 0 | 0 | 0  | 2 | 3 | 0 | 0 | 5.6 | 95% (0.023)   |
| E9PKF6 | PPP6R3  | Serine/threonine-protein phosphatase 6 regulatory subunit 3                                                                                                                                              | 0 | 5  | 0 | 0 | 0 | 0 | 0  | 0 | 4 | 1 | 0 | 5.6 | 95% (0.023)   |
| Q9C0C9 | UBE2O   | Ubiquitin-conjugating enzyme E2 O (EC 6.3.2.19) (Ubiquitin carrier protein O) (Ubiquitin-conjugating enzyme E2 of 230 kDa) (Ubiquitin-conjugating enzyme E2-230K) (Ubiquitin-protein ligase O)           | 0 | 5  | 0 | 0 | 0 | 0 | 0  | 0 | 4 | 1 | 0 | 5.6 | 95% (0.023)   |
| Q59GW6 |         | Acetyl-CoA acetyltransferase, cytosolic variant (Fragment)                                                                                                                                               | 0 | 5  | 0 | 0 | 0 | 0 | 0  | 5 | 0 | 0 | 0 | 5.6 | 95% (0.023)   |
| Q8NFF5 | FLAD1   | FAD synthase (EC 2.7.7.2) (FAD pyrophosphorylase) (FMN adenylyltransferase) (Flavin adenine dinucleotide synthase) [Includes: Molybdenum cofactor biosynthesis protein-like region; FAD synthase region] | 3 | 19 | 0 | 0 | 0 | 3 | 11 | 2 | 3 | 3 | 3 | 5.3 | 95% (0.00016) |
| Q9Y5Q9 | GTF3C3  | General transcription factor 3C polypeptide 3 (Transcription factor IIIC 102 kDa subunit) (TFIIIC 102 kDa subunit) (TFIIIC102) (Transcription factor IIIC subunit gamma) (TF3C-gamma)                    | 1 | 9  | 0 | 0 | 0 | 1 | 4  | 0 | 3 | 2 | 2 | 5.1 | 95% (0.0065)  |
| O15230 | LAMA5   | Laminin subunit alpha-5 (Laminin-10 subunit alpha) (Laminin-11 subunit alpha) (Laminin-15 subunit alpha)                                                                                                 | 1 | 9  | 1 | 0 | 0 | 0 | 3  | 1 | 3 | 2 | 2 | 5.1 | 95% (0.0065)  |
| Q6UX53 | METTL7B | Methyltransferase-like protein 7B (EC 2.1.1.-)                                                                                                                                                           | 1 | 9  | 1 | 0 | 0 | 0 | 6  | 1 | 1 | 1 | 1 | 5.1 | 95% (0.0065)  |
| P52569 | SLC7A2  | Low affinity cationic amino acid transporter 2 (CAT-2) (CAT2) (Solute carrier family 7 member 2)                                                                                                         | 1 | 9  | 1 | 0 | 0 | 0 | 1  | 3 | 2 | 3 | 3 | 5.1 | 95% (0.0065)  |
| J3KR97 | TBCD    | Tubulin-specific chaperone D                                                                                                                                                                             | 1 | 9  | 0 | 1 | 0 | 0 | 1  | 7 | 1 | 0 | 0 | 5.1 | 95% (0.0065)  |
| B4DMB5 |         | CTP synthase (EC 6.3.4.2) (UTP--ammonia ligase)                                                                                                                                                          | 1 | 9  | 0 | 0 | 0 | 1 | 5  | 5 | 0 | 0 | 0 | 5.1 | 95% (0.0065)  |
| P50851 | LRBA    | Lipopolysaccharide-responsive and beige-like anchor protein (Beige-like protein) (CDC4-like protein)                                                                                                     | 3 | 18 | 3 | 0 | 0 | 0 | 5  | 9 | 3 | 2 | 2 | 5.1 | 95% (0.00029) |
| Q9NZJ6 | COQ3    | Hexaprenyldihydroxybenzoate methyltransferase, mitochondrial (EC 2.1.1.114) (2-polyprenyl-6-hydroxyphenol                                                                                                | 0 | 4  | 0 | 0 | 0 | 0 | 4  | 0 | 0 | 0 | 0 | 4.7 | 95% (0.049)   |



|        |          |                                                                                                                                                                                                                                              |   |   |   |   |   |   |   |   |   |   |   |     |             |
|--------|----------|----------------------------------------------------------------------------------------------------------------------------------------------------------------------------------------------------------------------------------------------|---|---|---|---|---|---|---|---|---|---|---|-----|-------------|
|        |          | methylase) (EC 2.1.1.222) (3,4-dihydroxy-5-hexaprenylbenzoate methyltransferase) (DHMB methyltransferase) (DHMB-MT) (DHMB-MTase) (3-demethylubiquinone-10-3-methyltransferase) (EC 2.1.1.64) (Dihydroxyhexaprenylbenzoate methyltransferase) |   |   |   |   |   |   |   |   |   |   |   |     |             |
| P29762 | CRABP1   | Cellular retinoic acid-binding protein 1 (Cellular retinoic acid-binding protein 1) (CRABP-1)                                                                                                                                                | 0 | 4 | 0 | 0 | 0 | 0 | 0 | 0 | 4 | 0 | 0 | 4.7 | 95% (0.049) |
| P02741 | CRP      | C-reactive protein [Cleaved into: C-reactive protein(1-205)]                                                                                                                                                                                 | 0 | 4 | 0 | 0 | 0 | 0 | 0 | 0 | 0 | 0 | 4 | 4.7 | 95% (0.049) |
| P48507 | GCLM     | Glutamate--cysteine ligase regulatory subunit (GCS light chain) (Gamma-ECS regulatory subunit) (Gamma-glutamylcysteine synthetase regulatory subunit) (Glutamate--cysteine ligase modifier subunit)                                          | 0 | 4 | 0 | 0 | 0 | 0 | 0 | 0 | 4 | 0 | 0 | 4.7 | 95% (0.049) |
| Q96IJ6 | GMPPA    | Mannose-1-phosphate guanylyltransferase alpha (EC 2.7.7.13) (GDP-mannose pyrophosphorylase A) (GTP-mannose-1-phosphate guanylyltransferase alpha)                                                                                            | 0 | 4 | 0 | 0 | 0 | 0 | 0 | 2 | 1 | 1 | 1 | 4.7 | 95% (0.049) |
| Q9BYC9 | MRPL20   | 39S ribosomal protein L20, mitochondrial (L20mt) (MRP-L20)                                                                                                                                                                                   | 0 | 4 | 0 | 0 | 0 | 0 | 0 | 1 | 1 | 0 | 2 | 4.7 | 95% (0.049) |
| Q9UKX7 | NUP50    | Nuclear pore complex protein Nup50 (50 kDa nucleoporin) (Nuclear pore-associated protein 60 kDa-like) (Nucleoporin Nup50)                                                                                                                    | 0 | 4 | 0 | 0 | 0 | 0 | 0 | 2 | 0 | 2 | 0 | 4.7 | 95% (0.049) |
| E7EU94 | PRPF31   | U4/U6 small nuclear ribonucleoprotein Prp31 (Fragment)                                                                                                                                                                                       | 0 | 4 | 0 | 0 | 0 | 0 | 0 | 2 | 2 | 0 | 0 | 4.7 | 95% (0.049) |
| P26022 | PTX3     | Pentraxin-related protein PTX3 (Pentaxin-related protein PTX3) (Tumor necrosis factor alpha-induced protein 5) (TNF alpha-induced protein 5) (Tumor necrosis factor-inducible gene 14 protein) (TSG-14)                                      | 0 | 4 | 0 | 0 | 0 | 0 | 0 | 1 | 0 | 3 | 0 | 4.7 | 95% (0.049) |
| Q96AH8 | RAB7B    | Ras-related protein Rab-7b                                                                                                                                                                                                                   | 0 | 4 | 0 | 0 | 0 | 0 | 0 | 0 | 0 | 0 | 4 | 4.7 | 95% (0.049) |
| J3KNH7 | SEN3     | Sentrin-specific protease 3                                                                                                                                                                                                                  | 0 | 4 | 0 | 0 | 0 | 0 | 0 | 2 | 0 | 2 | 0 | 4.7 | 95% (0.049) |
| Q96K37 | SLC35E1  | Solute carrier family 35 member E1                                                                                                                                                                                                           | 0 | 4 | 0 | 0 | 0 | 0 | 0 | 0 | 2 | 0 | 2 | 4.7 | 95% (0.049) |
| Q15599 | SLC9A3R2 | Na(+)/H(+) exchange regulatory cofactor NHE-RF2 (NHERF-2) (NHE3 kinase A regulatory protein E3KARP) (SRY-                                                                                                                                    | 0 | 4 | 0 | 0 | 0 | 0 | 0 | 2 | 0 | 1 | 1 | 4.7 | 95% (0.049) |

|        |         |                                                                                                                                                                                                                             |   |   |   |   |   |   |   |   |   |   |     |             |
|--------|---------|-----------------------------------------------------------------------------------------------------------------------------------------------------------------------------------------------------------------------------|---|---|---|---|---|---|---|---|---|---|-----|-------------|
|        |         | interacting protein 1) (SIP-1) (Sodium-hydrogen exchanger regulatory factor 2) (Solute carrier family 9 isoform A3 regulatory factor 2) (Tyrosine kinase activator protein 1) (TKA-1)                                       |   |   |   |   |   |   |   |   |   |   |     |             |
| A8KAM9 |         | Peptidyl-prolyl cis-trans isomerase E (PPIase E) (EC 5.2.1.8)                                                                                                                                                               | 0 | 4 | 0 | 0 | 0 | 0 | 2 | 0 | 2 | 0 | 4.7 | 95% (0.049) |
| Q96HN2 | AHCYL2  | Putative adenosylhomocysteinase 3 (AdoHcyase 3) (EC 3.3.1.1) (S-adenosyl-L-homocysteine hydrolase 3) (S-adenosylhomocysteine hydrolase-like protein 2)                                                                      | 1 | 8 | 0 | 0 | 0 | 1 | 2 | 2 | 4 | 0 | 4.6 | 95% (0.013) |
| O94766 | B3GAT3  | Galactosylgalactosylxylosylprotein 3-beta-glucuronosyltransferase 3 (EC 2.4.1.135) (Beta-1,3-glucuronyltransferase 3) (Glucuronosyltransferase I) (GlcAT-I) (UDP-GlcUA:Gal beta-1,3-Gal-R glucuronyltransferase) (GlcUAT-I) | 1 | 8 | 0 | 0 | 0 | 1 | 2 | 1 | 2 | 3 | 4.6 | 95% (0.013) |
| O75208 | COQ9    | Ubiquinone biosynthesis protein COQ9, mitochondrial                                                                                                                                                                         | 1 | 8 | 1 | 0 | 0 | 0 | 6 | 0 | 2 | 0 | 4.6 | 95% (0.013) |
| P14324 | FDPS    | Farnesyl pyrophosphate synthase (FPP synthase) (FPS) (EC 2.5.1.10) ((2E,6E)-farnesyl diphosphate synthase) (Dimethylallyltransferase) (EC 2.5.1.1) (Farnesyl diphosphate synthase) (Geranyltransferase)                     | 1 | 8 | 0 | 1 | 0 | 0 | 7 | 0 | 1 | 0 | 4.6 | 95% (0.013) |
| B4E1G6 | GALK1   | Galactokinase (Galactokinase 1) (cDNA FLJ56840, highly similar to Galactokinase (EC 2.7.1.6))                                                                                                                               | 1 | 8 | 0 | 1 | 0 | 0 | 0 | 6 | 2 | 0 | 4.6 | 95% (0.013) |
| A0JP11 | PIK3R4  | Phosphoinositide-3-kinase, regulatory subunit 4                                                                                                                                                                             | 1 | 8 | 0 | 1 | 0 | 0 | 5 | 2 | 1 | 0 | 4.6 | 95% (0.013) |
| P63151 | PPP2R2A | Serine/threonine-protein phosphatase 2A 55 kDa regulatory subunit B alpha isoform (PP2A subunit B isoform B55-alpha) (PP2A subunit B isoform PR55-alpha) (PP2A subunit B isoform R2-alpha) (PP2A subunit B isoform alpha)   | 1 | 8 | 1 | 0 | 0 | 0 | 3 | 4 | 2 | 0 | 4.6 | 95% (0.013) |
| P98175 | RBM10   | RNA-binding protein 10 (G patch domain-containing protein 9) (RNA-binding motif                                                                                                                                             | 1 | 8 | 0 | 0 | 0 | 1 | 1 | 0 | 4 | 3 | 4.6 | 95% (0.013) |

|        |         |                                                                                                                                                                  |    |    |   |   |   |    |    |    |    |    |     |                 |
|--------|---------|------------------------------------------------------------------------------------------------------------------------------------------------------------------|----|----|---|---|---|----|----|----|----|----|-----|-----------------|
|        |         | protein 10) (RNA-binding protein S1-1) (S1-1)                                                                                                                    |    |    |   |   |   |    |    |    |    |    |     |                 |
| E1NZA1 | PRIC295 | Peroxisome proliferator activated receptor interacting complex protein                                                                                           | 21 | 90 | 4 | 2 | 2 | 13 | 40 | 38 | 12 | 2  | 4.6 | 95% (< 0.00010) |
| Q8IWA0 | WDR75   | WD repeat-containing protein 75                                                                                                                                  | 2  | 12 | 0 | 2 | 0 | 0  | 9  | 0  | 3  | 0  | 4.6 | 95% (0.0035)    |
| P36222 | CHI3L1  | Chitinase-3-like protein 1 (39 kDa synovial protein) (Cartilage glycoprotein 39) (CGP-39) (GP-39) (hCGP-39) (YKL-40)                                             | 5  | 24 | 3 | 1 | 0 | 1  | 2  | 1  | 3  | 18 | 4.5 | 95% (< 0.00010) |
| Q8TD30 | GPT2    | Alanine aminotransferase 2 (ALT2) (EC 2.6.1.2) (Glutamate pyruvate transaminase 2) (GPT 2) (Glutamic--alanine transaminase 2) (Glutamic--pyruvic transaminase 2) | 5  | 24 | 0 | 1 | 1 | 3  | 14 | 9  | 1  | 0  | 4.5 | 95% (< 0.00010) |
| Q92626 | PXDN    | Peroxidase homolog (EC 1.11.1.7) (Melanoma-associated antigen MG50) (Vascular peroxidase 1) (p53-responsive gene 2 protein)                                      | 4  | 19 | 4 | 0 | 0 | 0  | 10 | 1  | 2  | 6  | 4.3 | 95% (0.00051)   |
| P61221 | ABCE1   | ATP-binding cassette sub-family E member 1 (2'-5'-oligoadenylate-binding protein) (HuHP68) (RNase L inhibitor) (Ribonuclease 4 inhibitor) (RNS4I)                | 3  | 15 | 0 | 0 | 0 | 3  | 7  | 4  | 4  | 0  | 4.3 | 95% (0.0018)    |
| Q8IZV5 | RDH10   | Retinol dehydrogenase 10 (EC 1.1.1.300)                                                                                                                          | 2  | 11 | 1 | 0 | 1 | 0  | 0  | 9  | 1  | 1  | 4.2 | 95% (0.0064)    |
| Q8NBL1 | POGLUT1 | Protein O-glucosyltransferase 1 (EC 2.4.1.-) (CAP10-like 46 kDa protein) (hCLP46) (KTEL motif-containing protein 1) (Myelodysplastic syndromes relative protein) | 4  | 18 | 0 | 2 | 1 | 1  | 8  | 4  | 2  | 5  | 4.1 | 95% (0.00090)   |
| Q92905 | COPSS   | COP9 signalosome complex subunit 5 (SGN5) (Signalosome subunit 5) (EC 3.4.-.-) (Jun activation domain-binding protein 1)                                         | 1  | 7  | 0 | 0 | 0 | 1  | 4  | 1  | 2  | 0  | 4.1 | 95% (0.024)     |
| B7Z5H3 | MAOB    | Amine oxidase [flavin-containing] B (cDNA FLJ52418, highly similar to Amine oxidase [flavin-containing] B (EC 1.4.3.4))                                          | 1  | 7  | 0 | 0 | 0 | 1  | 0  | 7  | 0  | 0  | 4.1 | 95% (0.024)     |
| Q9Y266 | NUDC    | Nuclear migration protein nudC (Nuclear distribution protein C homolog)                                                                                          | 1  | 7  | 0 | 0 | 0 | 1  | 5  | 0  | 2  | 0  | 4.1 | 95% (0.024)     |
| P00738 | HP      | Haptoglobin (Zonulin) [Cleaved into: Haptoglobin alpha chain; Haptoglobin beta chain]                                                                            | 3  | 14 | 0 | 2 | 0 | 1  | 0  | 2  | 5  | 6  | 4.0 | 95% (0.0032)    |

|        |          |                                                                                                                                                             |    |    |   |   |   |   |    |    |    |    |     |                 |
|--------|----------|-------------------------------------------------------------------------------------------------------------------------------------------------------------|----|----|---|---|---|---|----|----|----|----|-----|-----------------|
| P02748 | C9       | Complement component C9 [Cleaved into: Complement component C9a; Complement component C9b]                                                                  | 2  | 10 | 0 | 0 | 0 | 2 | 0  | 0  | 0  | 10 | 3.9 | 95% (0.012)     |
| Q9BSD7 | NTPCR    | Cancer-related nucleoside-triphosphatase (NTPase) (EC 3.6.1.15) (Nucleoside triphosphate phosphohydrolase)                                                  | 2  | 10 | 2 | 0 | 0 | 0 | 1  | 2  | 0  | 7  | 3.9 | 95% (0.012)     |
| Q14151 | SAFB2    | Scaffold attachment factor B2 (SAF-B2)                                                                                                                      | 2  | 10 | 2 | 0 | 0 | 0 | 6  | 0  | 2  | 2  | 3.9 | 95% (0.012)     |
| P11388 | TOP2A    | DNA topoisomerase 2-alpha (EC 5.99.1.3) (DNA topoisomerase II, alpha isozyme)                                                                               | 20 | 68 | 0 | 9 | 9 | 2 | 26 | 18 | 14 | 10 | 3.7 | 95% (< 0.00010) |
| Q5JTZ9 | AARS2    | Alanine-tRNA ligase, mitochondrial (EC 6.1.1.7) (Alanyl-tRNA synthetase) (AlaRS)                                                                            | 1  | 6  | 1 | 0 | 0 | 0 | 5  | 0  | 0  | 1  | 3.6 | 95% (0.045)     |
| B4DQ14 | EIF2A    | Eukaryotic translation initiation factor 2A (cDNA FLJ58035, highly similar to Homo sapiens eukaryotic translation initiation factor (eIF) 2A (eIF2A), mRNA) | 1  | 6  | 0 | 0 | 0 | 1 | 3  | 3  | 1  | 0  | 3.6 | 95% (0.045)     |
| Q14232 | EIF2B1   | Translation initiation factor eIF-2B subunit alpha (eIF-2B GDP-GTP exchange factor subunit alpha)                                                           | 1  | 6  | 0 | 0 | 0 | 1 | 3  | 3  | 0  | 0  | 3.6 | 95% (0.045)     |
| Q96ND0 | FAM210A  | Protein FAM210A                                                                                                                                             | 1  | 6  | 0 | 0 | 1 | 0 | 1  | 2  | 2  | 1  | 3.6 | 95% (0.045)     |
| P82675 | MRPS5    | 28S ribosomal protein S5, mitochondrial (MRP-S5) (S5mt)                                                                                                     | 1  | 6  | 1 | 0 | 0 | 0 | 1  | 0  | 1  | 4  | 3.6 | 95% (0.045)     |
| B4DU97 | SLC25A17 | Peroxisomal membrane protein PMP34 (cDNA FLJ57596, highly similar to Peroxisomal membrane protein PMP34)                                                    | 1  | 6  | 0 | 1 | 0 | 0 | 2  | 4  | 0  | 0  | 3.6 | 95% (0.045)     |
| Q8NCA5 | FAM98A   | Protein FAM98A                                                                                                                                              | 2  | 9  | 0 | 0 | 0 | 2 | 3  | 3  | 1  | 2  | 3.5 | 95% (0.021)     |
| Q69YN4 | KIAA1429 | Protein virilizer homolog                                                                                                                                   | 2  | 9  | 0 | 1 | 1 | 0 | 2  | 0  | 7  | 0  | 3.5 | 95% (0.021)     |
| Q96T76 | MMS19    | MMS19 nucleotide excision repair protein homolog (hMMS19) (MET18 homolog) (MMS19-like protein)                                                              | 2  | 9  | 0 | 0 | 0 | 2 | 2  | 5  | 1  | 0  | 3.5 | 95% (0.021)     |
| P05165 | PCCA     | Propionyl-CoA carboxylase alpha chain, mitochondrial (PCCase subunit alpha) (EC 6.4.1.3) (Propanoyl-CoA:carbon dioxide ligase subunit alpha)                | 2  | 9  | 0 | 0 | 1 | 1 | 3  | 0  | 1  | 5  | 3.5 | 95% (0.021)     |
| P49588 | AARS     | Alanine-tRNA ligase, cytoplasmic (EC 6.1.1.7) (Alanyl-tRNA synthetase) (AlaRS) (Renal carcinoma antigen NY-REN-42)                                          | 11 | 37 | 0 | 2 | 4 | 5 | 15 | 18 | 6  | 0  | 3.5 | 95% (< 0.00010) |
| Q13131 | PRKAA1   | 5'-AMP-activated protein kinase catalytic subunit alpha-1 (AMPK subunit alpha-1) (EC 2.7.11.1) (Acetyl-CoA carboxylase                                      | 3  | 12 | 0 | 2 | 1 | 0 | 5  | 5  | 2  | 0  | 3.5 | 95% (0.0098)    |

|        |              |                                                                                                                                                                                  |    |    |   |   |   |   |    |    |    |    |     |                 |
|--------|--------------|----------------------------------------------------------------------------------------------------------------------------------------------------------------------------------|----|----|---|---|---|---|----|----|----|----|-----|-----------------|
|        |              | kinase) (ACACA kinase) (EC 2.7.11.27)<br>(Hydroxymethylglutaryl-CoA reductase kinase) (HMGR kinase) (EC 2.7.11.31)<br>(Tau-protein kinase PRKAA1) (EC 2.7.11.26)                 |    |    |   |   |   |   |    |    |    |    |     |                 |
| B9A018 | USP39        | U4/U6.U5 tri-snRNP-associated protein 2                                                                                                                                          | 3  | 12 | 1 | 0 | 2 | 0 | 0  | 0  | 11 | 1  | 3.5 | 95% (0.0098)    |
| Q59FH1 |              | Transformation/transcription domain-associated protein variant (Fragment)                                                                                                        | 3  | 12 | 1 | 0 | 0 | 2 | 2  | 0  | 9  | 1  | 3.5 | 95% (0.0098)    |
| Q9H3U1 | UNC45A       | Protein unc-45 homolog A (Unc-45A) (GCUNC-45) (Smooth muscle cell-associated protein 1) (SMAP-1)                                                                                 | 4  | 15 | 0 | 0 | 0 | 4 | 2  | 8  | 4  | 0  | 3.5 | 95% (0.0047)    |
| E7EUY3 | PCCB         | Propionyl-CoA carboxylase beta chain, mitochondrial                                                                                                                              | 9  | 29 | 1 | 3 | 2 | 3 | 17 | 1  | 3  | 9  | 3.3 | 95% (0.00023)   |
| M1V485 | SLC34A2-ROS1 | Tyrosine-protein kinase receptor (EC 2.7.10.1)                                                                                                                                   | 13 | 40 | 4 | 4 | 2 | 3 | 8  | 1  | 14 | 18 | 3.2 | 95% (< 0.00010) |
| Q96KA5 | CLPTM1L      | Cleft lip and palate transmembrane protein 1-like protein (CLPTM1-like protein) (Cisplatin resistance-related protein 9) (CRR9p)                                                 | 2  | 8  | 0 | 0 | 2 | 0 | 2  | 0  | 4  | 2  | 3.2 | 95% (0.037)     |
| A7J992 | PHIP         | Pleckstrin homology domain-interacting protein variant 1                                                                                                                         | 2  | 8  | 0 | 1 | 0 | 1 | 4  | 0  | 3  | 1  | 3.2 | 95% (0.037)     |
| Q96T51 | RUFY1        | RUN and FYVE domain-containing protein 1 (FYVE-finger protein EIP1) (La-binding protein 1) (Rab4-interacting protein) (Zinc finger FYVE domain-containing protein 12)            | 2  | 8  | 1 | 0 | 0 | 1 | 3  | 2  | 3  | 0  | 3.2 | 95% (0.037)     |
| B4DHJ3 |              | DNA-directed RNA polymerase (EC 2.7.7.6)                                                                                                                                         | 6  | 19 | 0 | 2 | 1 | 3 | 2  | 2  | 12 | 3  | 3.1 | 95% (0.0031)    |
| K7ELW0 | PARK7        | Protein DJ-1                                                                                                                                                                     | 5  | 16 | 1 | 1 | 2 | 1 | 5  | 5  | 3  | 3  | 3.1 | 95% (0.0065)    |
| P50895 | BCAM         | Basal cell adhesion molecule (Aubergier B antigen) (B-CAM cell surface glycoprotein) (F8/G253 antigen) (Lutheran antigen) (Lutheran blood group glycoprotein) (CD antigen CD239) | 11 | 32 | 0 | 2 | 1 | 8 | 14 | 0  | 16 | 2  | 3.0 | 95% (0.00025)   |
| Q6IAX9 | SRPR         | SRPR protein                                                                                                                                                                     | 17 | 48 | 0 | 5 | 6 | 6 | 18 | 12 | 15 | 4  | 3.0 | 95% (< 0.00010) |
| F8VPD4 | CAD          | CAD protein                                                                                                                                                                      | 10 | 29 | 3 | 2 | 2 | 3 | 17 | 7  | 4  | 1  | 3.0 | 95% (0.00049)   |
| O00468 | AGRN         | Agriin [Cleaved into: Agriin N-terminal 110 kDa subunit; Agriin C-terminal 110 kDa                                                                                               | 3  | 10 | 0 | 2 | 0 | 1 | 8  | 0  | 2  | 0  | 3.0 | 95% (0.029)     |

|        |       |                                                                                                                                                                                                                                                                                                                                                                                                                                                                          |    |    |   |   |   |   |   |   |    |   |     |               |
|--------|-------|--------------------------------------------------------------------------------------------------------------------------------------------------------------------------------------------------------------------------------------------------------------------------------------------------------------------------------------------------------------------------------------------------------------------------------------------------------------------------|----|----|---|---|---|---|---|---|----|---|-----|---------------|
|        |       | subunit; Agrin C-terminal 90 kDa fragment (C90); Agrin C-terminal 22 kDa fragment (C22)]                                                                                                                                                                                                                                                                                                                                                                                 |    |    |   |   |   |   |   |   |    |   |     |               |
| F5GZS0 | DHX36 | Probable ATP-dependent RNA helicase DHX36                                                                                                                                                                                                                                                                                                                                                                                                                                | 3  | 10 | 0 | 1 | 2 | 0 | 5 | 2 | 2  | 1 | 3.0 | 95% (0.029)   |
| B4DJK9 |       | Perilipin                                                                                                                                                                                                                                                                                                                                                                                                                                                                | 3  | 10 | 1 | 0 | 1 | 1 | 0 | 1 | 3  | 6 | 3.0 | 95% (0.029)   |
| Q6NVW7 | KPNA2 | Importin subunit alpha                                                                                                                                                                                                                                                                                                                                                                                                                                                   | 13 | 36 | 0 | 3 | 8 | 2 | 5 | 8 | 18 | 5 | 2.9 | 95% (0.00016) |
| P18583 | SON   | Protein SON (Bax antagonist selected in saccharomyces 1) (BASS1) (Negative regulatory element-binding protein) (NRE-binding protein) (Protein DBP-5) (SON3)                                                                                                                                                                                                                                                                                                              | 5  | 15 | 0 | 1 | 3 | 1 | 6 | 0 | 6  | 3 | 2.9 | 95% (0.011)   |
| E7D7X9 |       | Pyroline-5-carboxylate reductase (EC 1.5.1.2)                                                                                                                                                                                                                                                                                                                                                                                                                            | 5  | 15 | 0 | 2 | 2 | 1 | 5 | 6 | 4  | 0 | 2.9 | 95% (0.011)   |
| Q53GS0 |       | Nucleolar GTP-binding protein 1 (Fragment)                                                                                                                                                                                                                                                                                                                                                                                                                               | 4  | 12 | 1 | 0 | 0 | 2 | 6 | 2 | 4  | 0 | 2.8 | 95% (0.023)   |
| P22102 | GART  | Trifunctional purine biosynthetic protein adenosine-3 [Includes: Phosphoribosylamine--glycine ligase (EC 6.3.4.13) (Glycinamide ribonucleotide synthetase) (GARS) (Phosphoribosylglycinamide synthetase); Phosphoribosylformylglycinamide cycloligase (EC 6.3.3.1) (AIR synthase) (AIRS) (Phosphoribosyl-aminoimidazole synthetase); Phosphoribosylglycinamide formyltransferase (EC 2.1.2.2) (5'-phosphoribosylglycinamide transformylase) (GAR transformylase) (GART)] | 8  | 22 | 0 | 1 | 1 | 6 | 9 | 9 | 4  | 0 | 2.8 | 95% (0.0032)  |
| Q6IBU0 | EIF5  | EIF5 protein                                                                                                                                                                                                                                                                                                                                                                                                                                                             | 5  | 14 | 0 | 2 | 2 | 1 | 3 | 7 | 4  | 0 | 2.7 | 95% (0.017)   |
| A2RTY6 | ITIH2 | Inter-alpha (Globulin) inhibitor H2 (Inter-alpha (Globulin) inhibitor H2, isoform CRA_b) (cDNA FLJ75038, highly similar to Homo sapiens inter-alpha (globulin) inhibitor H2 (ITIH2), mRNA)                                                                                                                                                                                                                                                                               | 3  | 9  | 0 | 1 | 1 | 1 | 2 | 4 | 1  | 2 | 2.7 | 95% (0.049)   |
| B4E1K0 | KIF23 | Kinesin-like protein KIF23 (cDNA FLJ58416, highly similar to Kinesin-like protein KIF23)                                                                                                                                                                                                                                                                                                                                                                                 | 3  | 9  | 0 | 2 | 1 | 0 | 2 | 1 | 4  | 2 | 2.7 | 95% (0.049)   |

|        |          |                                                                                                                                                                                                                                                                                                                                              |    |     |    |    |    |    |    |     |    |    |     |                 |
|--------|----------|----------------------------------------------------------------------------------------------------------------------------------------------------------------------------------------------------------------------------------------------------------------------------------------------------------------------------------------------|----|-----|----|----|----|----|----|-----|----|----|-----|-----------------|
| Q06AH7 | TF       | Transferrin                                                                                                                                                                                                                                                                                                                                  | 34 | 83  | 1  | 11 | 10 | 12 | 27 | 13  | 30 | 14 | 2.7 | 95% (< 0.00010) |
| Q13057 | COASY    | Bifunctional coenzyme A synthase (CoA synthase) (NBP) (POV-2) [Includes: Phosphopantetheine adenylyltransferase (EC 2.7.7.3) (Dephospho-CoA pyrophosphorylase) (Pantheine-phosphate adenylyltransferase) (PPAT); Dephospho-CoA kinase (DPCK) (EC 2.7.1.24) (Dephosphocoenzyme A kinase) (DPCOAK)]                                            | 4  | 11  | 0  | 0  | 1  | 3  | 5  | 3   | 2  | 1  | 2.6 | 95% (0.037)     |
| O95864 | FADS2    | Fatty acid desaturase 2 (EC 1.14.19.-) (Delta(6) fatty acid desaturase) (D6D) (Delta(6) desaturase) (Delta-6 desaturase)                                                                                                                                                                                                                     | 4  | 11  | 0  | 2  | 2  | 0  | 2  | 0   | 9  | 0  | 2.6 | 95% (0.037)     |
| J3KN16 | KIAA0368 | Proteasome-associated protein ECM29 homolog                                                                                                                                                                                                                                                                                                  | 4  | 11  | 0  | 0  | 0  | 4  | 3  | 4   | 4  | 0  | 2.6 | 95% (0.037)     |
| E9PF74 | SLC25A19 | Mitochondrial thiamine pyrophosphate carrier                                                                                                                                                                                                                                                                                                 | 4  | 11  | 0  | 0  | 1  | 3  | 1  | 2   | 1  | 7  | 2.6 | 95% (0.037)     |
| Q7L014 | DDX46    | Probable ATP-dependent RNA helicase DDX46 (EC 3.6.4.13) (DEAD box protein 46) (PRP5 homolog)                                                                                                                                                                                                                                                 | 11 | 27  | 0  | 2  | 2  | 6  | 5  | 4   | 14 | 4  | 2.6 | 95% (0.0024)    |
| P68104 | EEF1A1   | Elongation factor 1-alpha 1 (EF-1-alpha-1) (Elongation factor Tu) (EF-Tu) (Eukaryotic elongation factor 1 A-1) (eEF1A-1) (Leukocyte receptor cluster member 7)                                                                                                                                                                               | 96 | 222 | 13 | 28 | 24 | 32 | 26 | 137 | 40 | 22 | 2.6 | 95% (< 0.00010) |
| Q9H5Q4 | TFB2M    | Dimethyladenosine transferase 2, mitochondrial (EC 2.1.1.-) (Hepatitis C virus NSSA-transactivated protein 5) (HCV NSSA-transactivated protein 5) (Mitochondrial 12S rRNA dimethylase 2) (Mitochondrial transcription factor B2) (h-mtTFB) (h-mtTFB2) (hTFB2M) (mtTFB2) (S-adenosylmethionine-6-N', N'-adenosyl(rRNA) dimethyltransferase 2) | 5  | 13  | 1  | 1  | 2  | 1  | 6  | 2   | 1  | 4  | 2.6 | 95% (0.028)     |
| P01023 | A2M      | Alpha-2-macroglobulin (Alpha-2-M) (C3 and PZP-like alpha-2-macroglobulin domain-containing protein 5)                                                                                                                                                                                                                                        | 9  | 22  | 0  | 1  | 7  | 1  | 2  | 1   | 6  | 12 | 2.5 | 95% (0.0062)    |
| Q0VGA5 | SARS     | SARS protein                                                                                                                                                                                                                                                                                                                                 | 9  | 22  | 0  | 0  | 1  | 8  | 7  | 9   | 6  | 0  | 2.5 | 95% (0.0062)    |
| Q5TC12 | ATPAF1   | ATP synthase mitochondrial F1 complex assembly factor 1 (ATP11 homolog)                                                                                                                                                                                                                                                                      | 6  | 15  | 1  | 2  | 2  | 1  | 10 | 2   | 3  | 0  | 2.5 | 95% (0.021)     |

|        |       |                                                                                                                                                                                                                                                                        |    |    |   |   |   |   |    |    |    |   |     |               |
|--------|-------|------------------------------------------------------------------------------------------------------------------------------------------------------------------------------------------------------------------------------------------------------------------------|----|----|---|---|---|---|----|----|----|---|-----|---------------|
| P14174 | MIF   | Macrophage migration inhibitory factor (MIF) (EC 5.3.2.1) (Glycosylation-inhibiting factor) (GIF) (L-dopachrome isomerase) (L-dopachrome tautomerase) (EC 5.3.3.12) (Phenylpyruvate tautomerase)                                                                       | 8  | 19 | 1 | 3 | 4 | 0 | 4  | 7  | 5  | 3 | 2.5 | 95% (0.012)   |
| P07741 | APRT  | Adenine phosphoribosyltransferase (APRT) (EC 2.4.2.7)                                                                                                                                                                                                                  | 14 | 32 | 1 | 3 | 5 | 5 | 9  | 15 | 4  | 4 | 2.4 | 95% (0.0017)  |
| Q8NCN5 | PDPPr | Pyruvate dehydrogenase phosphatase regulatory subunit, mitochondrial (PDPPr)                                                                                                                                                                                           | 14 | 32 | 2 | 5 | 6 | 1 | 21 | 2  | 1  | 9 | 2.4 | 95% (0.0017)  |
| Q9H0S4 | DDX47 | Probable ATP-dependent RNA helicase DDX47 (EC 3.6.4.13) (DEAD box protein 47)                                                                                                                                                                                          | 9  | 21 | 0 | 1 | 5 | 3 | 4  | 7  | 6  | 4 | 2.4 | 95% (0.0095)  |
| P45974 | USP5  | Ubiquitin carboxyl-terminal hydrolase 5 (EC 3.4.19.12) (Deubiquitinating enzyme 5) (Isopeptidase T) (Ubiquitin thioesterase 5) (Ubiquitin-specific-processing protease 5)                                                                                              | 10 | 23 | 0 | 0 | 3 | 7 | 6  | 15 | 3  | 0 | 2.4 | 95% (0.0073)  |
| Q8NI27 | THOC2 | THO complex subunit 2 (Tho2) (hTREX120)                                                                                                                                                                                                                                | 11 | 25 | 1 | 2 | 4 | 3 | 7  | 1  | 12 | 5 | 2.4 | 95% (0.0056)  |
| Q5W0H4 | TPT1  | Translationally-controlled tumor protein                                                                                                                                                                                                                               | 11 | 25 | 2 | 4 | 3 | 1 | 8  | 8  | 6  | 3 | 2.4 | 95% (0.0056)  |
| O14976 | GAK   | Cyclin-G-associated kinase (EC 2.7.11.1)                                                                                                                                                                                                                               | 5  | 12 | 0 | 1 | 2 | 3 | 3  | 6  | 3  | 0 | 2.4 | 95% (0.044)   |
| Q9Y4W2 | LAS1L | Ribosomal biogenesis protein LAS1L (Protein LAS1 homolog)                                                                                                                                                                                                              | 5  | 12 | 2 | 0 | 0 | 3 | 6  | 2  | 0  | 5 | 2.4 | 95% (0.044)   |
| A5PLK7 | RCC2  | RCC2 protein (Fragment)                                                                                                                                                                                                                                                | 6  | 14 | 0 | 1 | 1 | 4 | 8  | 4  | 2  | 0 | 2.4 | 95% (0.033)   |
| Q6URC4 |       | Diaphanous 1                                                                                                                                                                                                                                                           | 7  | 16 | 0 | 3 | 3 | 1 | 7  | 2  | 5  | 1 | 2.3 | 95% (0.025)   |
| Q53GX7 |       | Threonyl-tRNA synthetase variant (Fragment)                                                                                                                                                                                                                            | 19 | 41 | 0 | 6 | 5 | 8 | 15 | 13 | 9  | 4 | 2.3 | 95% (0.00071) |
| O15254 | ACOX3 | Peroxisomal acyl-coenzyme A oxidase 3 (EC 1.3.3.6) (Branched-chain acyl-CoA oxidase) (BRCAcox) (Pristanoyl-CoA oxidase)                                                                                                                                                | 8  | 18 | 7 | 0 | 1 | 0 | 1  | 8  | 3  | 6 | 2.3 | 95% (0.019)   |
| Q9UIG0 | BAZ1B | Tyrosine-protein kinase BAZ1B (EC 2.7.10.2) (Bromodomain adjacent to zinc finger domain protein 1B) (Williams syndrome transcription factor) (Williams-Beuren syndrome chromosomal region 10 protein) (Williams-Beuren syndrome chromosomal region 9 protein) (hWALp2) | 8  | 18 | 2 | 2 | 0 | 5 | 14 | 0  | 3  | 1 | 2.3 | 95% (0.019)   |



|        |        |                                                                                                                                                                                                                                                                                                                                                                                                                     |    |    |   |    |    |    |    |    |    |    |     |                 |
|--------|--------|---------------------------------------------------------------------------------------------------------------------------------------------------------------------------------------------------------------------------------------------------------------------------------------------------------------------------------------------------------------------------------------------------------------------|----|----|---|----|----|----|----|----|----|----|-----|-----------------|
| P61289 | PSME3  | Proteasome activator complex subunit 3 (11S regulator complex subunit gamma) (REG-gamma) (Activator of multicatalytic protease subunit 3) (Ki nuclear autoantigen) (Proteasome activator 28 subunit gamma) (PA28g) (PA28gamma)                                                                                                                                                                                      | 8  | 18 | 0 | 1  | 1  | 6  | 4  | 6  | 8  | 1  | 2.3 | 95% (0.019)     |
| P10909 | CLU    | Clusterin (Aging-associated gene 4 protein) (Apolipoprotein J) (Apo-J) (Complement cytolysis inhibitor) (CLI) (Complement-associated protein SP-40,40) (Ku70-binding protein 1) (NA1/NA2) (Testosterone-repressed prostate message 2) (TRPM-2) [Cleaved into: Clusterin beta chain (ApoJalpha) (Complement cytolysis inhibitor a chain); Clusterin alpha chain (ApoJbeta) (Complement cytolysis inhibitor b chain)] | 9  | 20 | 3 | 1  | 4  | 1  | 1  | 8  | 3  | 7  | 2.3 | 95% (0.014)     |
| Q969X5 | ERGIC1 | Endoplasmic reticulum-Golgi intermediate compartment protein 1 (ER-Golgi intermediate compartment 32 kDa protein) (ERGIC-32)                                                                                                                                                                                                                                                                                        | 9  | 20 | 7 | 0  | 0  | 2  | 2  | 6  | 7  | 5  | 2.3 | 95% (0.014)     |
| P18428 | LBP    | Lipopolysaccharide-binding protein (LBP)                                                                                                                                                                                                                                                                                                                                                                            | 9  | 20 | 0 | 2  | 1  | 6  | 0  | 0  | 4  | 15 | 2.3 | 95% (0.014)     |
| Q4LE36 | ACLY   | ACLY variant protein (Fragment)                                                                                                                                                                                                                                                                                                                                                                                     | 31 | 64 | 0 | 12 | 9  | 10 | 28 | 24 | 11 | 2  | 2.3 | 95% (< 0.00010) |
| Q96RP9 | GFM1   | Elongation factor G, mitochondrial (EF-Gmt) (Elongation factor G 1, mitochondrial) (mEF-G 1) (Elongation factor G1) (hEFG1)                                                                                                                                                                                                                                                                                         | 33 | 68 | 4 | 12 | 10 | 8  | 37 | 6  | 10 | 15 | 2.3 | 95% (< 0.00010) |
| B5BTZ6 | STAT3  | Signal transducer and activator of transcription                                                                                                                                                                                                                                                                                                                                                                    | 20 | 41 | 3 | 7  | 3  | 7  | 12 | 21 | 9  | 0  | 2.2 | 95% (0.0012)    |
| P54577 | YARS   | Tyrosine--tRNA ligase, cytoplasmic (EC 6.1.1.1) (Tyrosyl-tRNA synthetase) (TyrRS) [Cleaved into: Tyrosine--tRNA ligase, cytoplasmic, N-terminally processed]                                                                                                                                                                                                                                                        | 9  | 19 | 0 | 3  | 3  | 3  | 7  | 8  | 3  | 1  | 2.2 | 95% (0.022)     |
| P11172 | UMPS   | Uridine 5'-monophosphate synthase (UMP synthase) [Includes: Orotate phosphoribosyltransferase (OPRT) (OPRTase) (EC 2.4.2.10); Orotidine 5'-                                                                                                                                                                                                                                                                         | 8  | 17 | 0 | 2  | 5  | 1  | 12 | 2  | 3  | 1  | 2.2 | 95% (0.029)     |

|        |        |                                                                                                                                                                                                                                                                                                                                                                                                                                             |    |     |    |    |    |    |    |    |    |    |     |                 |
|--------|--------|---------------------------------------------------------------------------------------------------------------------------------------------------------------------------------------------------------------------------------------------------------------------------------------------------------------------------------------------------------------------------------------------------------------------------------------------|----|-----|----|----|----|----|----|----|----|----|-----|-----------------|
|        |        | phosphate decarboxylase (ODC) (EC 4.1.1.23) (OMPdecase)]                                                                                                                                                                                                                                                                                                                                                                                    |    |     |    |    |    |    |    |    |    |    |     |                 |
| Q53FW8 |        | TAP binding protein-like variant (Fragment)                                                                                                                                                                                                                                                                                                                                                                                                 | 7  | 15  | 2  | 0  | 0  | 6  | 0  | 11 | 0  | 5  | 2.2 | 95% (0.038)     |
| Q53G19 |        | Mitochondrial ribosomal protein L11 isoform a variant (Fragment)                                                                                                                                                                                                                                                                                                                                                                            | 7  | 15  | 3  | 3  | 0  | 1  | 4  | 0  | 5  | 6  | 2.2 | 95% (0.038)     |
| P01024 | C3     | Complement C3 (C3 and PZP-like alpha-2-macroglobulin domain-containing protein 1) [Cleaved into: Complement C3 beta chain; Complement C3 alpha chain; C3a anaphylatoxin; Acylation stimulating protein (ASP) (C3adesArg); Complement C3b alpha' chain; Complement C3c alpha' chain fragment 1; Complement C3dg fragment; Complement C3g fragment; Complement C3d fragment; Complement C3f fragment; Complement C3c alpha' chain fragment 2] | 54 | 104 | 18 | 11 | 11 | 15 | 5  | 14 | 38 | 47 | 2.1 | 95% (< 0.00010) |
| Q7L2H7 | EIF3M  | Eukaryotic translation initiation factor 3 subunit M (eIF3m) (Fetal lung protein B5) (hFL-B5) (PCI domain-containing protein 1)                                                                                                                                                                                                                                                                                                             | 11 | 22  | 0  | 5  | 1  | 5  | 6  | 10 | 4  | 2  | 2.1 | 95% (0.018)     |
| Q9BW92 | TARS2  | Threonine--tRNA ligase, mitochondrial (EC 6.1.1.3) (Threonyl-tRNA synthetase) (ThrRS) (Threonyl-tRNA synthetase-like 1)                                                                                                                                                                                                                                                                                                                     | 11 | 22  | 4  | 3  | 2  | 2  | 11 | 1  | 3  | 7  | 2.1 | 95% (0.018)     |
| Q9BYD6 | MRPL1  | 39S ribosomal protein L1, mitochondrial (L1mt) (MRP-L1)                                                                                                                                                                                                                                                                                                                                                                                     | 9  | 18  | 5  | 1  | 3  | 0  | 8  | 3  | 3  | 4  | 2.1 | 95% (0.032)     |
| J3KQ32 | OLA1   | Obg-like ATPase 1                                                                                                                                                                                                                                                                                                                                                                                                                           | 9  | 18  | 0  | 2  | 2  | 5  | 3  | 6  | 4  | 5  | 2.1 | 95% (0.032)     |
| Q02338 | BDH1   | D-beta-hydroxybutyrate dehydrogenase, mitochondrial (BDH) (EC 1.1.1.30) (3-hydroxybutyrate dehydrogenase)                                                                                                                                                                                                                                                                                                                                   | 17 | 33  | 7  | 1  | 0  | 8  | 13 | 12 | 7  | 1  | 2.1 | 95% (0.0054)    |
| P49792 | RANBP2 | E3 SUMO-protein ligase RanBP2 (EC 6.3.2.-) (358 kDa nucleoporin) (Nuclear pore complex protein Nup358) (Nucleoporin Nup358) (Ran-binding protein 2) (RanBP2) (p270)                                                                                                                                                                                                                                                                         | 17 | 33  | 2  | 4  | 4  | 7  | 7  | 6  | 15 | 5  | 2.1 | 95% (0.0054)    |
| Q8IY17 | PNPLA6 | Neuropathy target esterase (EC 3.1.1.5) (Patatin-like phospholipase domain-containing protein 6)                                                                                                                                                                                                                                                                                                                                            | 8  | 16  | 6  | 0  | 1  | 1  | 4  | 1  | 5  | 6  | 2.1 | 95% (0.042)     |

|        |        |                                                                                                                                                                                                                                                               |     |     |    |    |    |    |    |    |    |    |      |                    |
|--------|--------|---------------------------------------------------------------------------------------------------------------------------------------------------------------------------------------------------------------------------------------------------------------|-----|-----|----|----|----|----|----|----|----|----|------|--------------------|
| P52948 | NUP98  | Nuclear pore complex protein Nup98-<br>Nup96 [Cleaved into: Nuclear pore<br>complex protein Nup98 (98 kDa<br>nucleoporin) (Nucleoporin Nup98)<br>(Nup98); Nuclear pore complex protein<br>Nup96 (96 kDa nucleoporin) (Nucleoporin<br>Nup96) (Nup96)]          | 15  | 29  | 4  | 2  | 2  | 7  | 4  | 3  | 15 | 7  | 2.1  | 95% (0.0091)       |
| P23526 | AHCY   | Adenosylhomocysteinase (AdoHcyase)<br>(EC 3.3.1.1) (S-adenosyl-L-homocysteine<br>hydrolase)                                                                                                                                                                   | 11  | 21  | 0  | 3  | 2  | 8  | 6  | 8  | 4  | 2  | 2.0  | 95% (0.027)        |
| A8K3C3 |        | T-complex protein 1 subunit delta                                                                                                                                                                                                                             | 27  | 50  | 6  | 8  | 6  | 7  | 23 | 12 | 11 | 4  | 2.0  | 95% (0.0012)       |
| Q13505 | MTX1   | Metaxin-1 (Mitochondrial outer membrane<br>import complex protein 1)                                                                                                                                                                                          | 10  | 19  | 3  | 0  | 0  | 7  | 6  | 4  | 5  | 4  | 2.0  | 95% (0.035)        |
| B4DZ67 | NUP107 | Nuclear pore complex protein Nup107<br>(cDNA FLJ58739, highly similar to<br>Nuclear pore complex protein Nup107)                                                                                                                                              | 10  | 19  | 3  | 3  | 1  | 3  | 3  | 2  | 10 | 4  | 2.0  | 95% (0.035)        |
| Q96TC7 | RMDN3  | Regulator of microtubule dynamics protein<br>3 (RMD-3) (hRMD-3) (Cerebral protein<br>10) (Protein FAM82A2) (Protein<br>FAM82C) (Protein tyrosine phosphatase-<br>interacting protein 51) (TCPTP-interacting<br>protein 51)                                    | 10  | 19  | 5  | 1  | 0  | 4  | 0  | 0  | 12 | 7  | 2.0  | 95% (0.035)        |
| O15042 | U2SURP | U2 snRNP-associated SURP motif-<br>containing protein (140 kDa Ser/Arg-rich<br>domain protein) (U2-associated protein<br>SR140)                                                                                                                               | 18  | 33  | 2  | 5  | 4  | 7  | 8  | 4  | 12 | 9  | 2.0  | 95% (0.0085)       |
| F1T0J2 | GOLGB1 | Golgin subfamily B member 1                                                                                                                                                                                                                                   | 17  | 31  | 5  | 5  | 6  | 1  | 13 | 1  | 12 | 5  | 2.0  | 95% (0.011)        |
| POC0L5 | C4B    | Complement C4-B (Basic complement C4)<br>(C3 and PZP-like alpha-2-macroglobulin<br>domain-containing protein 3) [Cleaved<br>into: Complement C4 beta chain;<br>Complement C4-B alpha chain; C4a<br>anaphylatoxin; C4b-B; C4d-B;<br>Complement C4 gamma chain] | 12  | 22  | 0  | 2  | 2  | 8  | 3  | 0  | 17 | 3  | 2.0  | 95% (0.029)        |
| P02786 | TFRC   | Transferrin receptor protein 1 (TR) (TfR)<br>(TfR1) (TfR) (T9) (p90) (CD antigen<br>CD71) [Cleaved into: Transferrin receptor<br>protein 1, serum form (sTfR)]                                                                                                | 117 | 205 | 29 | 34 | 37 | 20 | 59 | 36 | 47 | 65 | 2.0  | 95% (<<br>0.00010) |
| Q53EW8 |        | Thiosulfate sulfurtransferase variant<br>(Fragment)                                                                                                                                                                                                           | 30  | 13  | 12 | 8  | 6  | 4  | 7  | 3  | 0  | 3  | -2.0 | 95% (0.019)        |

|        |        |                                                                                                                                                                                     |     |     |    |     |     |     |    |    |    |    |      |                 |
|--------|--------|-------------------------------------------------------------------------------------------------------------------------------------------------------------------------------------|-----|-----|----|-----|-----|-----|----|----|----|----|------|-----------------|
| Q8NC56 | LEMD2  | LEM domain-containing protein 2 (hLEM2)                                                                                                                                             | 41  | 18  | 11 | 6   | 5   | 19  | 4  | 6  | 3  | 5  | -2.0 | 95% (0.0072)    |
| B7XGC2 | HLA-A  | MHC class I antigen (Fragment)                                                                                                                                                      | 52  | 23  | 5  | 11  | 13  | 23  | 3  | 5  | 8  | 7  | -2.0 | 95% (0.0028)    |
| P02042 | HBD    | Hemoglobin subunit delta (Delta-globin) (Hemoglobin delta chain)                                                                                                                    | 235 | 106 | 0  | 76  | 82  | 67  | 0  | 0  | 26 | 0  | -2.0 | 95% (< 0.00010) |
| Q14254 | FLOT2  | Flotillin-2 (Epidermal surface antigen) (ESA) (Membrane component chromosome 17 surface marker 1)                                                                                   | 49  | 21  | 23 | 10  | 8   | 10  | 2  | 9  | 3  | 7  | -2.0 | 95% (0.0027)    |
| H6A2E0 | HLA-B  | MHC class I antigen (Fragment)                                                                                                                                                      | 38  | 16  | 0  | 9   | 0   | 15  | 0  | 0  | 7  | 0  | -2.0 | 95% (0.0068)    |
| A0S117 | COX1   | Cytochrome c oxidase subunit 1 (EC 1.9.3.1) (Fragment)                                                                                                                              | 20  | 8   | 8  | 4   | 5   | 2   | 2  | 2  | 1  | 3  | -2.1 | 95% (0.037)     |
| P50570 | DNM2   | Dynamin-2 (EC 3.6.5.5)                                                                                                                                                              | 20  | 8   | 0  | 1   | 9   | 9   | 5  | 3  | 1  | 0  | -2.1 | 95% (0.037)     |
| Q56VL3 | OCIAD2 | OCIA domain-containing protein 2 (Ovarian carcinoma immunoreactive antigen-like protein)                                                                                            | 27  | 11  | 14 | 7   | 3   | 3   | 2  | 4  | 1  | 4  | -2.1 | 95% (0.018)     |
| Q6FGL0 | LGALS3 | Galectin (Fragment)                                                                                                                                                                 | 34  | 14  | 10 | 6   | 3   | 15  | 2  | 5  | 4  | 3  | -2.1 | 95% (0.0088)    |
| P16144 | ITGB4  | Integrin beta-4 (GP150) (CD antigen CD104)                                                                                                                                          | 39  | 16  | 30 | 4   | 4   | 1   | 2  | 0  | 2  | 12 | -2.1 | 95% (0.0050)    |
| Q9NUQ9 | FAM49B | Protein FAM49B (L1)                                                                                                                                                                 | 23  | 9   | 1  | 11  | 5   | 6   | 0  | 4  | 4  | 1  | -2.1 | 95% (0.023)     |
| C8C504 | HBB    | Beta-globin                                                                                                                                                                         | 360 | 151 | 22 | 113 | 124 | 105 | 25 | 35 | 37 | 55 | -2.1 | 95% (< 0.00010) |
| Q92520 | FAM3C  | Protein FAM3C (Interleukin-like EMT inducer)                                                                                                                                        | 50  | 20  | 18 | 10  | 8   | 14  | 4  | 5  | 5  | 6  | -2.2 | 95% (0.0012)    |
| Q9Y394 | DHRS7  | Dehydrogenase/reductase SDR family member 7 (EC 1.1.-.-) (Retinal short-chain dehydrogenase/reductase 4) (retSDR4)                                                                  | 38  | 15  | 18 | 8   | 7   | 5   | 0  | 5  | 3  | 7  | -2.2 | 95% (0.0041)    |
| Q14566 | MCM6   | DNA replication licensing factor MCM6 (EC 3.6.4.12) (p105MCM)                                                                                                                       | 19  | 7   | 0  | 9   | 11  | 0   | 5  | 1  | 1  | 0  | -2.2 | 95% (0.030)     |
| Q99653 | CHP1   | Calcineurin B homologous protein 1 (Calcineurin B-like protein) (Calcium-binding protein CHP) (Calcium-binding protein p22) (EF-hand calcium-binding domain-containing protein p22) | 24  | 9   | 12 | 3   | 4   | 5   | 1  | 3  | 1  | 3  | -2.2 | 95% (0.016)     |
| P56385 | ATP5I  | ATP synthase subunit e, mitochondrial (ATPase subunit e)                                                                                                                            | 17  | 6   | 3  | 2   | 4   | 8   | 0  | 2  | 3  | 1  | -2.2 | 95% (0.033)     |
| Q86WA6 | BPHL   | Valacyclovir hydrolase (VACVase) (Valacyclovirase) (EC 3.1.-.-) (Biphenyl hydrolase-like protein) (Biphenyl hydrolase-related protein) (Bph-rp) (Breast                             | 17  | 6   | 3  | 1   | 5   | 8   | 0  | 0  | 1  | 5  | -2.2 | 95% (0.033)     |

|        |         |                                                                                                                                                                                                                                                                                                                                                       |    |    |    |    |    |    |   |   |   |   |      |               |
|--------|---------|-------------------------------------------------------------------------------------------------------------------------------------------------------------------------------------------------------------------------------------------------------------------------------------------------------------------------------------------------------|----|----|----|----|----|----|---|---|---|---|------|---------------|
|        |         | epithelial mucin-associated antigen (MCNAA)                                                                                                                                                                                                                                                                                                           |    |    |    |    |    |    |   |   |   |   |      |               |
| Q4AEJ3 | hfo1    | Mitochondrial transmembrane GTPase Fzo-1                                                                                                                                                                                                                                                                                                              | 17 | 6  | 7  | 4  | 4  | 2  | 3 | 1 | 1 | 2 | -2.2 | 95% (0.033)   |
| P02730 | SLC4A1  | Band 3 anion transport protein (Anion exchange protein 1) (AE 1) (Anion exchanger 1) (Solute carrier family 4 member 1) (CD antigen CD233)                                                                                                                                                                                                            | 63 | 24 | 3  | 27 | 26 | 7  | 5 | 2 | 9 | 8 | -2.3 | 95% (0.00016) |
| E7EVP7 | ITPR1   | Inositol 1,4,5-trisphosphate receptor type 1                                                                                                                                                                                                                                                                                                          | 25 | 9  | 14 | 4  | 7  | 0  | 1 | 0 | 1 | 7 | -2.3 | 95% (0.012)   |
| E3SWK8 | HLA-C   | MHC class I antigen (Fragment)                                                                                                                                                                                                                                                                                                                        | 28 | 10 | 0  | 8  | 0  | 12 | 0 | 0 | 4 | 0 | -2.3 | 95% (0.0073)  |
| P27701 | CD82    | CD82 antigen (C33 antigen) (IA4) (Inducible membrane protein R2) (Metastasis suppressor Kangai-1) (Suppressor of tumorigenicity 6 protein) (Tetraspanin-27) (Tspan-27) (CD antigen CD82)                                                                                                                                                              | 44 | 16 | 13 | 12 | 15 | 4  | 5 | 1 | 5 | 5 | -2.3 | 95% (0.00097) |
| Q16555 | DPYSL2  | Dihydropyrimidinase-related protein 2 (DRP-2) (Collapsin response mediator protein 2) (CRMP-2) (N2A3) (Unc-33-like phosphoprotein 2) (ULIP-2)                                                                                                                                                                                                         | 21 | 7  | 2  | 11 | 8  | 0  | 0 | 2 | 2 | 0 | -2.4 | 95% (0.014)   |
| P29728 | OAS2    | 2'-5'-oligoadenylate synthase 2 (2-5)oligo(A) synthase 2 (2-5A synthase 2) (EC 2.7.7.84) (p69 OAS / p71 OAS) (p69OAS / p71OAS)                                                                                                                                                                                                                        | 21 | 7  | 0  | 2  | 2  | 17 | 0 | 7 | 0 | 0 | -2.4 | 95% (0.014)   |
| Q96IU4 | ABHD14B | Alpha/beta hydrolase domain-containing protein 14B (Abhydrolase domain-containing protein 14B) (EC 3.-.-.-) (CCG1-interacting factor B)                                                                                                                                                                                                               | 13 | 4  | 2  | 3  | 3  | 5  | 0 | 3 | 1 | 0 | -2.4 | 95% (0.042)   |
| O14657 | TOR1B   | Torsin-1B (Torsin family 1 member B)                                                                                                                                                                                                                                                                                                                  | 13 | 4  | 0  | 2  | 2  | 9  | 0 | 1 | 0 | 3 | -2.4 | 95% (0.042)   |
| Q96CW1 | AP2M1   | AP-2 complex subunit mu (AP-2 mu chain) (Adapter-related protein complex 2 subunit mu) (Adaptin-mu2) (Adaptor protein complex AP-2 subunit mu) (Clathrin assembly protein complex 2 mu medium chain) (Clathrin coat assembly protein AP50) (Clathrin coat-associated protein AP50) (HA2 50 kDa subunit) (Plasma membrane adaptor AP-2 50 kDa protein) | 32 | 11 | 10 | 9  | 5  | 9  | 3 | 1 | 3 | 4 | -2.4 | 95% (0.0032)  |
| O95294 | RASAL1  | RasGAP-activating-like protein 1                                                                                                                                                                                                                                                                                                                      | 19 | 6  | 19 | 0  | 0  | 0  | 0 | 0 | 0 | 6 | -2.5 | 95% (0.016)   |

|        |        |                                                                                                                                                                                                                                                                                                                      |     |    |    |    |    |    |   |   |    |    |      |                 |
|--------|--------|----------------------------------------------------------------------------------------------------------------------------------------------------------------------------------------------------------------------------------------------------------------------------------------------------------------------|-----|----|----|----|----|----|---|---|----|----|------|-----------------|
| B4DGM9 | TOR1A  | Torsin family 1, member A (Torsin A), isoform CRA_a (cDNA FLJ56343, highly similar to Torsin A)                                                                                                                                                                                                                      | 33  | 11 | 8  | 8  | 4  | 14 | 0 | 4 | 3  | 4  | -2.5 | 95% (0.0022)    |
| P21589 | NT5E   | 5'-nucleotidase (5'-NT) (EC 3.1.3.5) (Ecto-5'-nucleotidase) (CD antigen CD73)                                                                                                                                                                                                                                        | 22  | 7  | 7  | 9  | 7  | 0  | 0 | 3 | 2  | 2  | -2.5 | 95% (0.0098)    |
| P05109 | S100A8 | Protein S100-A8 (Calgranulin-A) (Calprotectin L1L subunit) (Cystic fibrosis antigen) (CFAG) (Leukocyte L1 complex light chain) (Migration inhibitory factor-related protein 8) (MRP-8) (p8) (S100 calcium-binding protein A8) (Urinary stone protein band A) [Cleaved into: Protein S100-A8, N-terminally processed] | 53  | 18 | 1  | 22 | 20 | 10 | 0 | 5 | 5  | 8  | -2.5 | 95% (0.00014)   |
| Q14573 | ITPR3  | Inositol 1,4,5-trisphosphate receptor type 3 (IP3 receptor isoform 3) (IP3R3) (InsP3R3) (Type 3 inositol 1,4,5-trisphosphate receptor) (Type 3 InsP3 receptor)                                                                                                                                                       | 138 | 48 | 85 | 21 | 29 | 5  | 6 | 0 | 32 | 10 | -2.5 | 95% (< 0.00010) |
| Q9Y2A7 | NCKAP1 | Nck-associated protein 1 (NAP1) (Membrane-associated protein HEM-2) (p125Nap1)                                                                                                                                                                                                                                       | 28  | 9  | 11 | 5  | 6  | 5  | 2 | 3 | 1  | 2  | -2.5 | 95% (0.0038)    |
| P39687 | ANP32A | Acidic leucine-rich nuclear phosphoprotein 32 family member A (Acidic nuclear phosphoprotein pp32) (Leucine-rich acidic nuclear protein) (LANP) (Mapmodulin) (Potent heat-stable protein phosphatase 2A inhibitor 1) (PP2A) (Putative HLA-DR-associated protein 1) (PHAPI)                                           | 11  | 3  | 1  | 3  | 1  | 7  | 1 | 0 | 2  | 0  | -2.6 | 95% (0.046)     |
| Q96BM9 | ARL8A  | ADP-ribosylation factor-like protein 8A (ADP-ribosylation factor-like protein 10B) (Novel small G protein indispensable for equal chromosome segregation 2)                                                                                                                                                          | 40  | 13 | 14 | 10 | 8  | 8  | 0 | 4 | 3  | 6  | -2.6 | 95% (0.00063)   |
| Q9UKV8 | AGO2   | Protein argonaute-2 (Argonaute2) (hAgo2) (EC 3.1.26.n2) (Argonaute RISC catalytic component 2) (Eukaryotic translation initiation factor 2C 2) (eIF-2C 2) (eIF2C 2) (PAZ Piwi domain protein) (PPD) (Protein slicer)                                                                                                 | 14  | 4  | 0  | 6  | 8  | 1  | 1 | 0 | 2  | 1  | -2.6 | 95% (0.028)     |
| Q9H4M9 | EHD1   | EH domain-containing protein 1 (PAST homolog 1) (hPAST1) (Testilin)                                                                                                                                                                                                                                                  | 14  | 4  | 5  | 4  | 1  | 4  | 0 | 2 | 2  | 0  | -2.6 | 95% (0.028)     |

|        |        |                                                                                                                                                                                                                                                                                                                                |    |   |    |   |   |    |   |   |   |   |      |              |
|--------|--------|--------------------------------------------------------------------------------------------------------------------------------------------------------------------------------------------------------------------------------------------------------------------------------------------------------------------------------|----|---|----|---|---|----|---|---|---|---|------|--------------|
| Q13868 | EXOSC2 | Exosome complex component RRP4 (Exosome component 2) (Ribosomal RNA-processing protein 4)                                                                                                                                                                                                                                      | 14 | 4 | 0  | 4 | 4 | 6  | 1 | 1 | 2 | 0 | -2.6 | 95% (0.028)  |
| P00390 | GSR    | Glutathione reductase, mitochondrial (GR) (GRase) (EC 1.8.1.7)                                                                                                                                                                                                                                                                 | 17 | 5 | 2  | 7 | 7 | 1  | 1 | 0 | 2 | 2 | -2.6 | 95% (0.017)  |
| Q0PNF2 |        | FEX1                                                                                                                                                                                                                                                                                                                           | 17 | 5 | 0  | 7 | 9 | 0  | 0 | 0 | 1 | 4 | -2.6 | 95% (0.017)  |
| O15400 | STX7   | Syntaxin-7                                                                                                                                                                                                                                                                                                                     | 20 | 6 | 9  | 4 | 4 | 3  | 0 | 0 | 2 | 4 | -2.6 | 95% (0.011)  |
| P37235 | HPCAL1 | Hippocalcin-like protein 1 (Calcium-binding protein BDR-1) (HLP2) (Visinin-like protein 3) (VILIP-3)                                                                                                                                                                                                                           | 23 | 7 | 5  | 7 | 9 | 2  | 0 | 1 | 3 | 3 | -2.6 | 95% (0.0066) |
| P09429 | HMGB1  | High mobility group protein B1 (High mobility group protein 1) (HMG-1)                                                                                                                                                                                                                                                         | 29 | 9 | 8  | 5 | 5 | 11 | 2 | 1 | 1 | 5 | -2.6 | 95% (0.0026) |
| P17301 | ITGA2  | Integrin alpha-2 (CD49 antigen-like family member B) (Collagen receptor) (Platelet membrane glycoprotein Ia) (GPIa) (VLA-2 subunit alpha) (CD antigen CD49b)                                                                                                                                                                   | 24 | 7 | 10 | 7 | 7 | 0  | 0 | 0 | 0 | 7 | -2.7 | 95% (0.0045) |
| Q9UQB8 | BAIAP2 | Brain-specific angiogenesis inhibitor 1-associated protein 2 (BAI-associated protein 2) (BAI1-associated protein 2) (Protein BAP2) (Fas ligand-associated factor 3) (FLAF3) (Insulin receptor substrate p53/p58) (IRS-58) (IRSp53/58) (Insulin receptor substrate protein of 53 kDa) (IRSp53) (Insulin receptor substrate p53) | 21 | 6 | 8  | 4 | 4 | 5  | 1 | 0 | 3 | 2 | -2.7 | 95% (0.0071) |
| Q9HIE5 | TMX4   | Thioredoxin-related transmembrane protein 4 (Thioredoxin domain-containing protein 13)                                                                                                                                                                                                                                         | 21 | 6 | 8  | 3 | 5 | 5  | 0 | 1 | 2 | 3 | -2.7 | 95% (0.0071) |
| Q9BUP0 | EFHD1  | EF-hand domain-containing protein D1 (EF-hand domain-containing protein 1) (Swiprosin-2)                                                                                                                                                                                                                                       | 15 | 4 | 0  | 6 | 7 | 2  | 0 | 2 | 1 | 1 | -2.8 | 95% (0.018)  |
| J3QKR5 | CDK11B | Cyclin-dependent kinase 11B                                                                                                                                                                                                                                                                                                    | 12 | 3 | 0  | 3 | 4 | 5  | 1 | 0 | 1 | 1 | -2.8 | 95% (0.030)  |
| P36915 | GNL1   | Guanine nucleotide-binding protein-like 1 (GTP-binding protein HSR1)                                                                                                                                                                                                                                                           | 12 | 3 | 0  | 1 | 2 | 9  | 1 | 1 | 1 | 0 | -2.8 | 95% (0.030)  |
| O60664 | PLIN3  | Perilipin-3 (47 kDa mannose 6-phosphate receptor-binding protein) (47 kDa MPR-binding protein) (Cargo selection protein TIP47) (Mannose-6-phosphate receptor-binding protein 1) (Placental protein 17) (PP17)                                                                                                                  | 12 | 3 | 8  | 1 | 1 | 2  | 0 | 0 | 0 | 3 | -2.8 | 95% (0.030)  |

|        |         |                                                                                                                                                                                                          |     |    |    |    |    |    |    |   |    |   |      |                 |
|--------|---------|----------------------------------------------------------------------------------------------------------------------------------------------------------------------------------------------------------|-----|----|----|----|----|----|----|---|----|---|------|-----------------|
| Q6PL18 | ATAD2   | ATPase family AAA domain-containing protein 2 (EC 3.6.1.3) (AAA nuclear coregulator cancer-associated protein) (ANCCA)                                                                                   | 9   | 2  | 0  | 4  | 5  | 0  | 0  | 0 | 2  | 0 | -2.8 | 95% (0.050)     |
| Q96ER9 | CCDC51  | Coiled-coil domain-containing protein 51                                                                                                                                                                 | 9   | 2  | 1  | 0  | 0  | 8  | 0  | 0 | 0  | 2 | -2.8 | 95% (0.050)     |
| Q92522 | HIFX    | Histone H1x                                                                                                                                                                                              | 9   | 2  | 0  | 2  | 3  | 4  | 0  | 0 | 0  | 2 | -2.8 | 95% (0.050)     |
| B4DG22 | RPS6KA3 | Ribosomal protein S6 kinase alpha-3 (cDNA FLJ56618, highly similar to Ribosomal protein S6 kinase alpha-3 (EC 2.7.11.1))                                                                                 | 9   | 2  | 0  | 4  | 4  | 1  | 1  | 1 | 0  | 0 | -2.8 | 95% (0.050)     |
| Q86WV6 | TMEM173 | Stimulator of interferon genes protein (hSTING) (Endoplasmic reticulum interferon stimulator) (ERIS) (Mediator of IRF3 activation) (hMITA) (Transmembrane protein 173)                                   | 25  | 7  | 8  | 5  | 1  | 11 | 0  | 2 | 2  | 3 | -2.8 | 95% (0.0030)    |
| O94905 | ERLIN2  | Erlin-2 (Endoplasmic reticulum lipid raft-associated protein 2) (Stomatin-prohibitin-flotillin-HflC/K domain-containing protein 2) (SPFH domain-containing protein 2)                                    | 61  | 18 | 19 | 13 | 14 | 15 | 1  | 5 | 4  | 8 | -2.9 | 95% (< 0.00010) |
| Q3SXM5 | HSDL1   | Inactive hydroxysteroid dehydrogenase-like protein 1                                                                                                                                                     | 16  | 4  | 9  | 2  | 4  | 1  | 1  | 0 | 1  | 2 | -2.9 | 95% (0.012)     |
| Q14108 | SCARB2  | Lysosome membrane protein 2 (85 kDa lysosomal membrane sialoglycoprotein) (LGP85) (CD36 antigen-like 2) (Lysosome membrane protein II) (LIMP II) (Scavenger receptor class B member 2) (CD antigen CD36) | 26  | 7  | 9  | 7  | 6  | 4  | 0  | 1 | 4  | 3 | -3.0 | 95% (0.0020)    |
| P12109 | COL6A1  | Collagen alpha-1(VI) chain                                                                                                                                                                               | 13  | 3  | 1  | 7  | 5  | 0  | 0  | 0 | 0  | 3 | -3.0 | 95% (0.019)     |
| H3BN55 | RAB27A  | Ras-related protein Rab-27A (Fragment)                                                                                                                                                                   | 13  | 3  | 10 | 0  | 2  | 1  | 0  | 0 | 2  | 1 | -3.0 | 95% (0.019)     |
| P58107 | EPPK1   | Epiplakin (450 kDa epidermal antigen)                                                                                                                                                                    | 134 | 39 | 53 | 21 | 31 | 31 | 22 | 3 | 12 | 2 | -3.0 | 95% (< 0.00010) |
| Q9Y276 | BCS1L   | Mitochondrial chaperone BCS1 (h-BCS1) (BCS1-like protein)                                                                                                                                                | 10  | 2  | 3  | 3  | 2  | 2  | 0  | 2 | 0  | 0 | -3.1 | 95% (0.031)     |
| B7ZKL3 | EPS8L2  | EPS8L2 protein (Epidermal growth factor receptor kinase substrate 8-like protein 2)                                                                                                                      | 10  | 2  | 6  | 1  | 2  | 1  | 2  | 0 | 0  | 0 | -3.1 | 95% (0.031)     |
| B4DKK2 | SRI     | Sorcin (cDNA FLJ60640, highly similar to Sorcin)                                                                                                                                                         | 10  | 2  | 3  | 3  | 1  | 3  | 0  | 2 | 0  | 0 | -3.1 | 95% (0.031)     |
| P12532 | CKMT1A  | Creatine kinase U-type, mitochondrial (EC 2.7.3.2) (Acidic-type mitochondrial                                                                                                                            | 31  | 8  | 13 | 5  | 3  | 11 | 2  | 0 | 6  | 0 | -3.1 | 95% (0.00055)   |



|        |         |                                                                                                                                                                                          |    |    |    |    |    |    |   |   |   |   |      |                 |
|--------|---------|------------------------------------------------------------------------------------------------------------------------------------------------------------------------------------------|----|----|----|----|----|----|---|---|---|---|------|-----------------|
|        |         | creatine kinase) (Mia-CK) (Ubiquitous mitochondrial creatine kinase) (U-MiCK)                                                                                                            |    |    |    |    |    |    |   |   |   |   |      |                 |
| O75911 | DHRS3   | Short-chain dehydrogenase/reductase 3 (EC 1.1.1.300) (DD83.1) (Retinal short-chain dehydrogenase/reductase 1) (retSDR1)                                                                  | 21 | 5  | 12 | 2  | 7  | 0  | 0 | 1 | 3 | 1 | -3.2 | 95% (0.0031)    |
| H3BPE1 | MACF1   | Microtubule-actin cross-linking factor 1, isoforms 1/2/3/5                                                                                                                               | 43 | 11 | 9  | 11 | 19 | 5  | 4 | 0 | 7 | 0 | -3.2 | 95% (< 0.00010) |
| Q14019 | COTL1   | Coactosin-like protein                                                                                                                                                                   | 7  | 1  | 0  | 2  | 5  | 0  | 0 | 0 | 1 | 0 | -3.3 | 95% (0.050)     |
| Q7KZN9 | COX15   | Cytochrome c oxidase assembly protein COX15 homolog                                                                                                                                      | 7  | 1  | 3  | 0  | 0  | 4  | 0 | 1 | 0 | 0 | -3.3 | 95% (0.050)     |
| P14854 | COX6B1  | Cytochrome c oxidase subunit 6B1 (Cytochrome c oxidase subunit VIb isoform 1) (COX VIb-1)                                                                                                | 7  | 1  | 1  | 1  | 2  | 3  | 1 | 0 | 0 | 0 | -3.3 | 95% (0.050)     |
| B1AUU8 | EPS15   | Epidermal growth factor receptor substrate 15                                                                                                                                            | 7  | 1  | 1  | 4  | 2  | 0  | 1 | 0 | 0 | 0 | -3.3 | 95% (0.050)     |
| Q6ZRV2 | FAM83H  | Protein FAM83H                                                                                                                                                                           | 7  | 1  | 5  | 0  | 0  | 2  | 1 | 0 | 0 | 0 | -3.3 | 95% (0.050)     |
| P26012 | ITGB8   | Integrin beta-8                                                                                                                                                                          | 7  | 1  | 3  | 1  | 1  | 2  | 0 | 0 | 1 | 0 | -3.3 | 95% (0.050)     |
| G3V2F7 | TMEM189 | HCG2044781 (Protein TMEM189-UBE2V1) (Transmembrane protein 189)                                                                                                                          | 7  | 1  | 1  | 1  | 3  | 2  | 1 | 0 | 0 | 0 | -3.3 | 95% (0.050)     |
| D3DQ48 | TMEM59  | Transmembrane protein 59, isoform CRA_e                                                                                                                                                  | 7  | 1  | 0  | 4  | 3  | 0  | 1 | 0 | 0 | 0 | -3.3 | 95% (0.050)     |
| Q9H269 | VPS16   | Vacuolar protein sorting-associated protein 16 homolog (hVPS16)                                                                                                                          | 7  | 1  | 2  | 2  | 1  | 2  | 0 | 1 | 0 | 0 | -3.3 | 95% (0.050)     |
| Q6YHK3 | CD109   | CD109 antigen (150 kDa TGF-beta-1-binding protein) (C3 and PZP-like alpha-2-macroglobulin domain-containing protein 7) (Platelet-specific Gv antigen) (p180) (r150) (CD antigen CD109)   | 19 | 4  | 6  | 7  | 6  | 0  | 2 | 0 | 2 | 0 | -3.4 | 95% (0.0031)    |
| O76027 | ANXA9   | Annexin A9 (Annexin XXXI) (Annexin-31) (Annexin-9) (Pemphaxin)                                                                                                                           | 23 | 5  | 13 | 0  | 1  | 10 | 5 | 0 | 0 | 0 | -3.5 | 95% (0.0013)    |
| P55011 | SLC12A2 | Solute carrier family 12 member 2 (Basolateral Na-K-Cl symporter) (Bumetanide-sensitive sodium-(potassium)-chloride cotransporter 1)                                                     | 31 | 7  | 1  | 14 | 17 | 0  | 5 | 0 | 1 | 1 | -3.5 | 95% (0.00023)   |
| P27695 | APEX1   | DNA-(apurinic or apyrimidinic site) lyase (EC 3.1.-.-) (EC 4.2.99.18) (APEX nuclease) (APEN) (Apurinic-apyrimidinic endonuclease 1) (AP endonuclease 1) (APE-1) (REF-1) (Redox factor-1) | 16 | 3  | 0  | 1  | 1  | 14 | 1 | 1 | 1 | 0 | -3.6 | 95% (0.0047)    |

|        |               |                                                                                                                                                       |      |     |     |     |     |     |    |    |     |    |      |                 |
|--------|---------------|-------------------------------------------------------------------------------------------------------------------------------------------------------|------|-----|-----|-----|-----|-----|----|----|-----|----|------|-----------------|
|        |               | [Cleaved into: DNA-(apurinic or apyrimidinic site) lyase, mitochondrial]                                                                              |      |     |     |     |     |     |    |    |     |    |      |                 |
| A4D2Q0 | UNC84A        | SUN domain-containing protein 1 (Unc-84 homolog A (C. elegans))                                                                                       | 16   | 3   | 13  | 2   | 0   | 2   | 1  | 0  | 0   | 2  | -3.6 | 95% (0.0047)    |
| Q7L5L3 | GDPD3         | Glycerophosphodiester phosphodiesterase domain-containing protein 3 (EC 3.1.-.-)                                                                      | 12   | 2   | 1   | 1   | 0   | 10  | 1  | 0  | 1   | 0  | -3.6 | 95% (0.012)     |
| Q9H3Z4 | DNAJC5        | DnaJ homolog subfamily C member 5 (Cysteine string protein) (CSP)                                                                                     | 8    | 1   | 2   | 2   | 2   | 2   | 0  | 0  | 0   | 1  | -3.7 | 95% (0.029)     |
| H0Y6T6 | NRM           | Nurim (Fragment)                                                                                                                                      | 8    | 1   | 2   | 0   | 0   | 6   | 0  | 0  | 0   | 1  | -3.7 | 95% (0.029)     |
| F8J390 | PKP3          | Plakophilin 3b (Fragment)                                                                                                                             | 8    | 1   | 4   | 0   | 2   | 2   | 1  | 0  | 0   | 0  | -3.7 | 95% (0.029)     |
| P49903 | SEPHS1        | Selenide, water dikinase 1 (EC 2.7.9.3) (Selenium donor protein 1) (Selenophosphate synthase 1)                                                       | 8    | 1   | 0   | 3   | 1   | 4   | 1  | 0  | 0   | 0  | -3.7 | 95% (0.029)     |
| P37837 | TALDO1        | Transaldolase (EC 2.2.1.2)                                                                                                                            | 21   | 4   | 2   | 2   | 9   | 8   | 1  | 1  | 1   | 1  | -3.8 | 95% (0.0012)    |
| Q5HYL6 | DKFZp686E1899 | Putative uncharacterized protein DKFZp686E1899                                                                                                        | 13   | 2   | 1   | 1   | 7   | 4   | 0  | 0  | 2   | 0  | -3.9 | 95% (0.0070)    |
| Q59FB9 |               | Toll interacting protein variant (Fragment)                                                                                                           | 13   | 2   | 6   | 4   | 2   | 2   | 0  | 0  | 1   | 1  | -3.9 | 95% (0.0070)    |
| F8VXY3 | OAS1          | 2'-5'-oligoadenylate synthase 1                                                                                                                       | 18   | 3   | 0   | 0   | 0   | 18  | 0  | 3  | 0   | 0  | -4.0 | 95% (0.0018)    |
| E5KSE7 |               | Mitochondrial short-chain specific acyl-CoA dehydrogenase                                                                                             | 18   | 3   | 5   | 5   | 3   | 5   | 0  | 1  | 0   | 1  | -4.0 | 95% (0.0018)    |
| P33897 | ABCD1         | ATP-binding cassette sub-family D member 1 (Adrenoleukodystrophy protein) (ALDP)                                                                      | 9    | 1   | 4   | 1   | 0   | 4   | 0  | 0  | 1   | 0  | -4.1 | 95% (0.017)     |
| Q9NTX5 | ECHDC1        | Ethylmalonyl-CoA decarboxylase (EC 4.1.1.94) (Enoyl-CoA hydratase domain-containing protein 1) (Methylmalonyl-CoA decarboxylase) (MMCD) (EC 4.1.1.41) | 9    | 1   | 3   | 2   | 1   | 3   | 0  | 0  | 1   | 0  | -4.1 | 95% (0.017)     |
| O43920 | NDUFS5        | NADH dehydrogenase [ubiquinone] iron-sulfur protein 5 (Complex I-15 kDa) (CI-15 kDa) (NADH-ubiquinone oxidoreductase 15 kDa subunit)                  | 9    | 1   | 3   | 2   | 2   | 2   | 0  | 0  | 1   | 0  | -4.1 | 95% (0.017)     |
| Q00796 | SORD          | Sorbitol dehydrogenase (EC 1.1.1.14) (L-iditol 2-dehydrogenase)                                                                                       | 9    | 1   | 0   | 0   | 0   | 9   | 0  | 0  | 1   | 0  | -4.1 | 95% (0.017)     |
| Q15149 | PLEC          | Plectin (PCN) (PLTN) (Hemidesmosomal protein 1) (HD1) (Plectin-1)                                                                                     | 1115 | 246 | 418 | 276 | 278 | 146 | 34 | 22 | 108 | 83 | -4.1 | 95% (< 0.00010) |
| P16157 | ANK1          | Ankyrin-1 (ANK-1) (Ankyrin-R) (Erythrocyte ankyrin)                                                                                                   | 28   | 5   | 0   | 12  | 16  | 0   | 0  | 0  | 5   | 0  | -4.2 | 95% (0.00012)   |
| Q99828 | CIB1          | Calcium and integrin-binding protein 1 (CIB) (Calcium- and integrin-binding                                                                           | 14   | 2   | 4   | 2   | 0   | 8   | 0  | 0  | 0   | 2  | -4.2 | 95% (0.0042)    |

|        |          |                                                                                                                                                 |    |   |    |   |   |   |   |   |   |   |      |               |
|--------|----------|-------------------------------------------------------------------------------------------------------------------------------------------------|----|---|----|---|---|---|---|---|---|---|------|---------------|
|        |          | protein) (CIBP) (Calmyrin) (DNA-PKcs-interacting protein) (Kinase-interacting protein) (KIP) (SNK-interacting protein 2-28) (SIP2-28)           |    |   |    |   |   |   |   |   |   |   |      |               |
| P05187 | ALPP     | Alkaline phosphatase, placental type (EC 3.1.3.1) (Alkaline phosphatase Regan isozyme) (Placental alkaline phosphatase 1) (PLAP-1)              | 24 | 4 | 14 | 5 | 5 | 0 | 0 | 0 | 0 | 4 | -4.3 | 95% (0.00028) |
| Q16864 | ATP6V1F  | V-type proton ATPase subunit F (V-ATPase subunit F) (V-ATPase 14 kDa subunit) (Vacuolar proton pump subunit F)                                  | 5  | 0 | 1  | 1 | 1 | 2 | 0 | 0 | 0 | 0 | -4.5 | 95% (0.042)   |
| Q9Y3E8 | C17orf25 | CGI-150 protein                                                                                                                                 | 5  | 0 | 0  | 2 | 1 | 2 | 0 | 0 | 0 | 0 | -4.5 | 95% (0.042)   |
| Q96N67 | DOCK7    | Dedicator of cytokinesis protein 7                                                                                                              | 5  | 0 | 1  | 0 | 3 | 1 | 0 | 0 | 0 | 0 | -4.5 | 95% (0.042)   |
| P11678 | EPX      | Eosinophil peroxidase (EPO) (EC 1.11.1.7) [Cleaved into: Eosinophil peroxidase light chain; Eosinophil peroxidase heavy chain]                  | 5  | 0 | 2  | 0 | 0 | 3 | 0 | 0 | 0 | 0 | -4.5 | 95% (0.042)   |
| Q9NPD3 | EXOSC4   | Exosome complex component RRP41 (Exosome component 4) (Ribosomal RNA-processing protein 41) (p12A)                                              | 5  | 0 | 0  | 3 | 0 | 2 | 0 | 0 | 0 | 0 | -4.5 | 95% (0.042)   |
| Q96J02 | ITCH     | E3 ubiquitin-protein ligase Itchy homolog (Itch) (EC 6.3.2.-) (Atrophin-1-interacting protein 4) (AIP4) (NFE2-associated polypeptide 1) (NAPP1) | 5  | 0 | 1  | 1 | 3 | 0 | 0 | 0 | 0 | 0 | -4.5 | 95% (0.042)   |
| B2ZGL7 | MGLL     | Monoacylglycerol lipase isoform 2                                                                                                               | 5  | 0 | 4  | 1 | 0 | 0 | 0 | 0 | 0 | 0 | -4.5 | 95% (0.042)   |
| Q9BXB4 | OSBPL11  | Oxysterol-binding protein-related protein 11 (ORP-11) (OSBP-related protein 11)                                                                 | 5  | 0 | 1  | 1 | 2 | 1 | 0 | 0 | 0 | 0 | -4.5 | 95% (0.042)   |
| P41247 | PNPLA4   | Patatin-like phospholipase domain-containing protein 4 (EC 3.1.1.3) (Protein GS2)                                                               | 5  | 0 | 4  | 0 | 1 | 0 | 0 | 0 | 0 | 0 | -4.5 | 95% (0.042)   |
| O75298 | RTN2     | Reticulon-2 (Neuroendocrine-specific protein-like 1) (NSP-like protein 1) (Neuroendocrine-specific protein-like 1) (NSP-like protein 1) (NSPL1) | 5  | 0 | 3  | 0 | 0 | 2 | 0 | 0 | 0 | 0 | -4.5 | 95% (0.042)   |
| Q14BN4 | SLMAP    | Sarcolemmal membrane-associated protein (Sarcolemmal-associated protein)                                                                        | 5  | 0 | 5  | 0 | 0 | 0 | 0 | 0 | 0 | 0 | -4.5 | 95% (0.042)   |
| Q5W111 | SPRYD7   | SPRY domain-containing protein 7 (Chronic lymphocytic leukemia deletion region gene 6 protein) (CLL deletion region gene 6 protein)             | 5  | 0 | 4  | 1 | 0 | 0 | 0 | 0 | 0 | 0 | -4.5 | 95% (0.042)   |
| C9K0W8 | STX16    | Syntaxin-16 (Uncharacterized protein)                                                                                                           | 5  | 0 | 3  | 1 | 1 | 0 | 0 | 0 | 0 | 0 | -4.5 | 95% (0.042)   |

|        |          |                                                                                                                                                                                            |    |   |    |   |    |    |   |   |   |   |      |                 |
|--------|----------|--------------------------------------------------------------------------------------------------------------------------------------------------------------------------------------------|----|---|----|---|----|----|---|---|---|---|------|-----------------|
| Q9COC2 | TNKS1BP1 | 182 kDa tankyrase-1-binding protein                                                                                                                                                        | 5  | 0 | 2  | 1 | 2  | 0  | 0 | 0 | 0 | 0 | -4.5 | 95% (0.042)     |
| Q53GD8 |          | Peptidyl-prolyl cis-trans isomerase (Fragment)                                                                                                                                             | 5  | 0 | 0  | 1 | 0  | 4  | 0 | 0 | 0 | 0 | -4.5 | 95% (0.042)     |
| O00194 | RAB27B   | Ras-related protein Rab-27B (C25KG)                                                                                                                                                        | 10 | 1 | 7  | 1 | 2  | 0  | 0 | 0 | 1 | 0 | -4.5 | 95% (0.0098)    |
| P05164 | MPO      | Myeloperoxidase (MPO) (EC 1.11.2.2) [Cleaved into: Myeloperoxidase; 89 kDa myeloperoxidase; 84 kDa myeloperoxidase; Myeloperoxidase light chain; Myeloperoxidase heavy chain]              | 25 | 4 | 12 | 0 | 0  | 13 | 0 | 1 | 3 | 0 | -4.5 | 95% (0.00017)   |
| B2RMN7 | SPTB     | Spectrin, beta, erythrocytic                                                                                                                                                               | 16 | 2 | 0  | 6 | 10 | 0  | 1 | 0 | 0 | 0 | -4.7 | 95% (0.0015)    |
| P43155 | CRAT     | Carnitine O-acetyltransferase (Carnitine acetylase) (EC 2.3.1.7) (Carnitine acetyltransferase) (CAT) (CrAT)                                                                                | 11 | 1 | 1  | 1 | 5  | 4  | 0 | 1 | 0 | 0 | -4.9 | 95% (0.0056)    |
| Q8TE68 | EPS8L1   | Epidermal growth factor receptor kinase substrate 8-like protein 1 (EPS8-like protein 1) (Epidermal growth factor receptor pathway substrate 8-related protein 1) (EPS8-related protein 1) | 11 | 1 | 11 | 0 | 0  | 1  | 0 | 0 | 0 | 2 | -4.9 | 95% (0.0056)    |
| P08582 | MFI2     | Melanotransferrin (Melanoma-associated antigen p97) (CD antigen CD228)                                                                                                                     | 11 | 1 | 6  | 3 | 2  | 0  | 0 | 0 | 1 | 0 | -4.9 | 95% (0.0056)    |
| A8K8G0 | HDGF     | Hepatoma-derived growth factor (cDNA FLJ75113)                                                                                                                                             | 29 | 4 | 4  | 6 | 8  | 11 | 0 | 2 | 0 | 2 | -5.1 | 95% (< 0.00010) |
| Q13363 | CTBP1    | C-terminal-binding protein 1 (CBP1) (EC 1.1.1.-)                                                                                                                                           | 6  | 0 | 0  | 1 | 3  | 2  | 0 | 0 | 0 | 0 | -5.2 | 95% (0.022)     |
| E7ET76 | GGT1     | Gamma-glutamyltranspeptidase 1 light chain (Fragment)                                                                                                                                      | 6  | 0 | 3  | 1 | 2  | 0  | 0 | 0 | 0 | 0 | -5.2 | 95% (0.022)     |
| Q5T601 | GPR110   | Probable G-protein coupled receptor 110 (G-protein coupled receptor KPG_012) (G-protein coupled receptor PGR19)                                                                            | 6  | 0 | 4  | 0 | 0  | 2  | 0 | 0 | 0 | 0 | -5.2 | 95% (0.022)     |
| B7ZKT9 | KIAA1033 | KIAA1033 protein                                                                                                                                                                           | 6  | 0 | 5  | 0 | 0  | 1  | 0 | 0 | 0 | 0 | -5.2 | 95% (0.022)     |
| A2BDK6 | MAP1B    | Microtubule-associated protein 1B (Microtubule-associated protein 1B, isoform CRA_a)                                                                                                       | 6  | 0 | 2  | 1 | 3  | 0  | 0 | 0 | 0 | 0 | -5.2 | 95% (0.022)     |
| C9JS50 | STEAP4   | Metalloreductase STEAP4 (Uncharacterized protein)                                                                                                                                          | 6  | 0 | 0  | 2 | 1  | 3  | 0 | 0 | 0 | 0 | -5.2 | 95% (0.022)     |
| E5KNQ5 | TK2      | Mitochondrial thymidine kinase 2 (Thymidine kinase 2, mitochondrial) (Thymidine kinase 2, mitochondrial, isoform CRA_e)                                                                    | 6  | 0 | 2  | 2 | 1  | 1  | 0 | 0 | 0 | 0 | -5.2 | 95% (0.022)     |

|        |         |                                                                                                                                                                                                                                                                                                                                 |     |    |    |    |    |    |    |   |   |   |      |                 |
|--------|---------|---------------------------------------------------------------------------------------------------------------------------------------------------------------------------------------------------------------------------------------------------------------------------------------------------------------------------------|-----|----|----|----|----|----|----|---|---|---|------|-----------------|
| Q13753 | LAMC2   | Laminin subunit gamma-2 (Cell-scattering factor 140 kDa subunit) (CSF 140 kDa subunit) (Epiigrin subunit gamma) (Kalinin subunit gamma) (Kalinin/nicein/epiigrin 100 kDa subunit) (Ladsin 140 kDa subunit) (Laminin B2t chain) (Laminin-5 subunit gamma) (Large adhesive scatter factor 140 kDa subunit) (Nicein subunit gamma) | 30  | 4  | 4  | 12 | 14 | 0  | 0  | 0 | 0 | 3 | -5.3 | 95% (< 0.00010) |
| P26583 | HMGB2   | High mobility group protein B2 (High mobility group protein 2) (HMG-2)                                                                                                                                                                                                                                                          | 13  | 1  | 0  | 1  | 3  | 7  | 1  | 0 | 0 | 0 | -5.7 | 95% (0.0018)    |
| P09913 | IFIT2   | Interferon-induced protein with tetratricopeptide repeats 2 (IFIT-2) (ISG-54 K) (Interferon-induced 54 kDa protein) (IFI-54K) (P54)                                                                                                                                                                                             | 13  | 1  | 0  | 0  | 0  | 13 | 0  | 1 | 0 | 0 | -5.7 | 95% (0.0018)    |
| O75110 | ATP9A   | Probable phospholipid-transporting ATPase IIA (EC 3.6.3.1) (ATPase class II type 9A)                                                                                                                                                                                                                                            | 7   | 0  | 7  | 0  | 0  | 0  | 0  | 0 | 0 | 0 | -5.9 | 95% (0.012)     |
| Q96LJ7 | DHRS1   | Dehydrogenase/reductase SDR family member 1 (EC 1.1.-.-)                                                                                                                                                                                                                                                                        | 7   | 0  | 3  | 0  | 0  | 4  | 0  | 0 | 0 | 0 | -5.9 | 95% (0.012)     |
| Q8IWB1 | ITPRIP  | Inositol 1,4,5-trisphosphate receptor-interacting protein (Protein DANGER)                                                                                                                                                                                                                                                      | 7   | 0  | 6  | 0  | 0  | 1  | 0  | 0 | 0 | 0 | -5.9 | 95% (0.012)     |
| E9PDY6 | MUC4    | Mucin-4 beta chain                                                                                                                                                                                                                                                                                                              | 7   | 0  | 6  | 1  | 0  | 0  | 0  | 0 | 0 | 0 | -5.9 | 95% (0.012)     |
| Q9NQX4 | MYO5C   | Unconventional myosin-Vc                                                                                                                                                                                                                                                                                                        | 7   | 0  | 7  | 0  | 0  | 0  | 0  | 0 | 0 | 0 | -5.9 | 95% (0.012)     |
| Q7L523 | RRAGA   | Ras-related GTP-binding protein A (Rag A) (RagA) (Adenovirus E3 14.7 kDa-interacting protein 1) (FIP-1)                                                                                                                                                                                                                         | 7   | 0  | 1  | 1  | 3  | 2  | 0  | 0 | 0 | 0 | -5.9 | 95% (0.012)     |
| K7EKI8 | PPL     | Periplakin                                                                                                                                                                                                                                                                                                                      | 187 | 25 | 98 | 25 | 18 | 42 | 11 | 0 | 7 | 7 | -6.4 | 95% (< 0.00010) |
| Q5VYY1 | ANKRD22 | Ankyrin repeat domain-containing protein 22                                                                                                                                                                                                                                                                                     | 8   | 0  | 2  | 0  | 1  | 5  | 0  | 0 | 0 | 0 | -6.6 | 95% (0.0062)    |
| Q9NUI1 | DECR2   | Peroxisomal 2,4-dienoyl-CoA reductase (pDCR) (EC 1.3.1.34) (2,4-dienoyl-CoA reductase 2)                                                                                                                                                                                                                                        | 8   | 0  | 4  | 0  | 0  | 4  | 0  | 0 | 0 | 0 | -6.6 | 95% (0.0062)    |
| Q9UHL4 | DPP7    | Dipeptidyl peptidase 2 (EC 3.4.14.2) (Dipeptidyl aminopeptidase II) (Dipeptidyl peptidase 7) (Dipeptidyl peptidase II) (DPP II) (Quiescent cell proline dipeptidase)                                                                                                                                                            | 8   | 0  | 3  | 3  | 0  | 2  | 0  | 0 | 0 | 0 | -6.6 | 95% (0.0062)    |
| Q8WWP7 | GIMAP1  | GTPase IMAP family member 1 (Immunity-associated protein 1) (hIMAP1)                                                                                                                                                                                                                                                            | 8   | 0  | 0  | 2  | 2  | 3  | 0  | 0 | 0 | 0 | -6.6 | 95% (0.0062)    |

|        |         |                                                                                                                                                                                                              |    |   |    |    |    |   |   |   |   |   |   |      |                 |
|--------|---------|--------------------------------------------------------------------------------------------------------------------------------------------------------------------------------------------------------------|----|---|----|----|----|---|---|---|---|---|---|------|-----------------|
| E7ET40 | PLAU    | Urokinase-type plasminogen activator chain B                                                                                                                                                                 | 8  | 0 | 8  | 0  | 0  | 0 | 0 | 0 | 0 | 0 | 0 | -6.6 | 95% (0.0062)    |
| G3V207 | TMCC3   | Transmembrane and coiled-coil domain family 3, isoform CRA_c (Transmembrane and coiled-coil domains protein 3)                                                                                               | 8  | 0 | 8  | 0  | 0  | 0 | 0 | 0 | 0 | 0 | 0 | -6.6 | 95% (0.0062)    |
| Q8IY95 | TMEM192 | Transmembrane protein 192                                                                                                                                                                                    | 8  | 0 | 4  | 3  | 1  | 0 | 0 | 0 | 0 | 0 | 0 | -6.6 | 95% (0.0062)    |
| Q8TD43 | TRPM4   | Transient receptor potential cation channel subfamily M member 4 (hTRPM4) (Calcium-activated non-selective cation channel 1) (Long transient receptor potential channel 4) (LTrpC-4) (LTrpC4) (Melastatin-4) | 8  | 0 | 8  | 0  | 0  | 0 | 0 | 0 | 0 | 0 | 0 | -6.6 | 95% (0.0062)    |
| B2RC75 |         | Transmembrane channel-like protein                                                                                                                                                                           | 8  | 0 | 3  | 0  | 0  | 5 | 0 | 0 | 0 | 0 | 0 | -6.6 | 95% (0.0062)    |
| B4DKB2 | ECE1    | Endothelin-converting enzyme 1 (cDNA FLJ59212, highly similar to Endothelin-converting enzyme 1 (EC 3.4.24.71))                                                                                              | 38 | 4 | 11 | 13 | 15 | 0 | 3 | 0 | 1 | 0 | 0 | -6.7 | 95% (< 0.00010) |
| Q03013 | GSTM4   | Glutathione S-transferase Mu 4 (EC 2.5.1.18) (GST class-mu 4) (GST-Mu2) (GSTM4-4)                                                                                                                            | 9  | 0 | 0  | 2  | 0  | 7 | 0 | 0 | 0 | 0 | 0 | -7.3 | 95% (0.0033)    |
| P61601 | NCALD   | Neurocalcin-delta                                                                                                                                                                                            | 9  | 0 | 4  | 0  | 0  | 2 | 0 | 0 | 0 | 0 | 0 | -7.3 | 95% (0.0033)    |
| Q08AI8 | C2orf54 | Uncharacterized protein C2orf54                                                                                                                                                                              | 10 | 0 | 3  | 0  | 0  | 7 | 0 | 0 | 0 | 0 | 0 | -8.0 | 95% (0.0017)    |
| E9PSH2 | CD55    | Complement decay-accelerating factor                                                                                                                                                                         | 10 | 0 | 2  | 4  | 4  | 0 | 0 | 0 | 0 | 0 | 0 | -8.0 | 95% (0.0017)    |
| P01859 | IGHG2   | Ig gamma-2 chain C region                                                                                                                                                                                    | 10 | 0 | 0  | 0  | 0  | 6 | 0 | 0 | 0 | 0 | 0 | -8.0 | 95% (0.0017)    |
| Q8NI35 | INADL   | InaD-like protein (Inadl protein) (hINADL) (Pals1-associated tight junction protein) (Protein associated to tight junctions)                                                                                 | 10 | 0 | 9  | 0  | 0  | 1 | 0 | 0 | 0 | 0 | 0 | -8.0 | 95% (0.0017)    |
| J3QRN6 | MYO1D   | Unconventional myosin-1d                                                                                                                                                                                     | 10 | 0 | 10 | 0  | 0  | 0 | 0 | 0 | 0 | 0 | 0 | -8.0 | 95% (0.0017)    |
| P13727 | PRG2    | Bone marrow proteoglycan (BMPG) (Proteoglycan 2) [Cleaved into: Eosinophil granule major basic protein (EMBP) (MBP) (Pregnancy-associated major basic protein)]                                              | 10 | 0 | 4  | 0  | 0  | 6 | 0 | 0 | 0 | 0 | 0 | -8.0 | 95% (0.0017)    |
| B4DZS8 |         | Peptidyl-prolyl cis-trans isomerase (Fragment)                                                                                                                                                               | 10 | 0 | 0  | 4  | 6  | 0 | 0 | 0 | 0 | 0 | 0 | -8.0 | 95% (0.0017)    |
| Q16647 | PTGIS   | Prostacyclin synthase (EC 5.3.99.4) (Prostaglandin I2 synthase)                                                                                                                                              | 40 | 3 | 35 | 0  | 0  | 5 | 0 | 0 | 0 | 3 | 0 | -8.7 | 95% (< 0.00010) |
| F6M9T7 | IDO1    | Indolamine 2,3 dioxygenase (EC 1.13.11.52)                                                                                                                                                                   | 11 | 0 | 0  | 6  | 5  | 0 | 0 | 0 | 0 | 0 | 0 | -8.8 | 95% (0.00091)   |

|        |        |                                                                                                                                                                                                              |    |   |    |    |    |    |   |   |   |   |       |                 |
|--------|--------|--------------------------------------------------------------------------------------------------------------------------------------------------------------------------------------------------------------|----|---|----|----|----|----|---|---|---|---|-------|-----------------|
| Q9Y2J8 | PADI2  | Protein-arginine deiminase type-2 (EC 3.5.3.15) (PAD-H19) (Peptidylarginine deiminase II) (Protein-arginine deiminase type II)                                                                               | 11 | 0 | 0  | 5  | 6  | 0  | 0 | 0 | 0 | 0 | -8.8  | 95% (0.00091)   |
| P35354 | PTGS2  | Prostaglandin G/H synthase 2 (EC 1.14.99.1) (Cyclooxygenase-2) (COX-2) (PHS II) (Prostaglandin H2 synthase 2) (PGH synthase 2) (PGHS-2) (Prostaglandin-endoperoxide synthase 2)                              | 11 | 0 | 2  | 6  | 3  | 0  | 0 | 0 | 0 | 0 | -8.8  | 95% (0.00091)   |
| Q95758 | PTBP3  | Polypyrimidine tract-binding protein 3 (Regulator of differentiation 1) (Rod1)                                                                                                                               | 12 | 0 | 0  | 4  | 0  | 3  | 0 | 0 | 0 | 0 | -9.5  | 95% (0.00048)   |
| A8K7T0 |        | Kynureninase (EC 3.7.1.3)                                                                                                                                                                                    | 13 | 0 | 0  | 6  | 8  | 0  | 0 | 0 | 0 | 0 | -10.2 | 95% (0.00026)   |
| Q9H5V8 | CDCP1  | CUB domain-containing protein 1 (Membrane glycoprotein gp140) (Subtractive immunization M plus HEp3-associated 135 kDa protein) (SIMA135) (Transmembrane and associated with src kinases) (CD antigen CD318) | 14 | 0 | 1  | 6  | 7  | 0  | 0 | 0 | 0 | 0 | -10.9 | 95% (0.00014)   |
| P00488 | F13A1  | Coagulation factor XIII A chain (Coagulation factor XIIIa) (EC 2.3.2.13) (Protein-glutamine gamma-glutamyltransferase A chain) (Transglutaminase A chain)                                                    | 14 | 0 | 0  | 4  | 10 | 0  | 0 | 0 | 0 | 0 | -10.9 | 95% (0.00014)   |
| O60449 | LY75   | Lymphocyte antigen 75 (Ly-75) (C-type lectin domain family 13 member B) (DEC-205) (gp200-MR6) (CD antigen CD205)                                                                                             | 14 | 0 | 1  | 4  | 9  | 0  | 0 | 0 | 0 | 0 | -10.9 | 95% (0.00014)   |
| Q9ULV0 | MYO5B  | Unconventional myosin-Vb                                                                                                                                                                                     | 14 | 0 | 12 | 2  | 0  | 0  | 0 | 0 | 0 | 0 | -10.9 | 95% (0.00014)   |
| Q8IVF2 | AHNAK2 | Protein AHNAK2                                                                                                                                                                                               | 15 | 0 | 15 | 0  | 0  | 0  | 0 | 0 | 0 | 0 | -11.6 | 95% (< 0.00010) |
| P02549 | SPTA1  | Spectrin alpha chain, erythrocytic 1 (Erythroid alpha-spectrin)                                                                                                                                              | 16 | 0 | 0  | 5  | 11 | 0  | 0 | 0 | 0 | 0 | -12.3 | 95% (< 0.00010) |
| B7Z416 | DHRS9  | Dehydrogenase/reductase SDR family member 9 (cDNA FLJ55219, highly similar to Dehydrogenase/reductase SDR family member 9 (EC 1.1.-.-))                                                                      | 46 | 2 | 18 | 18 | 18 | 18 | 0 | 0 | 0 | 2 | -13.0 | 95% (< 0.00010) |
| B0QZ43 | ERLIN1 | Erlin-1 (Fragment)                                                                                                                                                                                           | 19 | 0 | 7  | 4  | 3  | 0  | 0 | 0 | 0 | 0 | -14.5 | 95% (< 0.00010) |

|        |       |                                                                                                                                                             |    |   |    |    |   |    |   |   |   |   |       |                 |
|--------|-------|-------------------------------------------------------------------------------------------------------------------------------------------------------------|----|---|----|----|---|----|---|---|---|---|-------|-----------------|
| H0Y3C5 | HCK   | Tyrosine-protein kinase HCK                                                                                                                                 | 19 | 0 | 2  | 2  | 2 | 2  | 0 | 0 | 0 | 0 | -14.5 | 95% (< 0.00010) |
| P20592 | MX2   | Interferon-induced GTP-binding protein Mx2 (Interferon-regulated resistance GTP-binding protein MxB) (Myxovirus resistance protein 2) (p78-related protein) | 28 | 0 | 0  | 0  | 3 | 22 | 0 | 0 | 0 | 0 | -20.9 | 95% (< 0.00010) |
| I6NXG5 | HLA-C | MHC class I antigen (Fragment)                                                                                                                              | 42 | 0 | 0  | 11 | 7 | 16 | 0 | 0 | 0 | 0 | -30.9 | 95% (< 0.00010) |
| B7ZLH8 | EVPL  | EVPL protein                                                                                                                                                | 52 | 0 | 33 | 2  | 0 | 16 | 0 | 0 | 0 | 0 | -38.1 | 95% (< 0.00010) |
| Q860I7 | HLA-B | MHC class I antigen                                                                                                                                         | 75 | 0 | 0  | 20 | 0 | 25 | 0 | 0 | 0 | 0 | -54.5 | 95% (< 0.00010) |

<sup>A</sup>Obtained from UniProt (<http://www.uniprot.org/>) databases

<sup>C</sup>Spectral counts (SpC) in CN datasets (combined)

<sup>D</sup>Spectral counts (SpC) in CR datasets (combined)

<sup>E</sup>Spectral count ratio (Rsc) between CR (combined) and CN (combined)

<sup>F</sup>Statistical significance (p-value) (Fisher's Exact Test)



**Table S4.** Proteins identified as unique to CN samples.

| Uniprot Acc <sup>A</sup> | Gene Symbol <sup>A</sup> | Protein Description <sup>A</sup>                                                                                                                                                                             | CN_Combined <sup>C</sup> | CR_Combined <sup>D</sup> | CN_1 | CN_2 | CN_3 | CN_4 | CR_1 | CR_2 | CR_3 | CR_4 | RSC (CR / CN) <sup>E</sup> | p value <sup>F</sup> |
|--------------------------|--------------------------|--------------------------------------------------------------------------------------------------------------------------------------------------------------------------------------------------------------|--------------------------|--------------------------|------|------|------|------|------|------|------|------|----------------------------|----------------------|
| Q860I7                   | HLA-B                    | MHC class I antigen                                                                                                                                                                                          | 75                       | 0                        | 0    | 20   | 0    | 25   | 0    | 0    | 0    | 0    | -54.5                      | 95% (< 0.00010)      |
| B7ZLH8                   | EVPL                     | EVPL protein                                                                                                                                                                                                 | 52                       | 0                        | 33   | 2    | 0    | 16   | 0    | 0    | 0    | 0    | -38.1                      | 95% (< 0.00010)      |
| I6NXG5                   | HLA-C                    | MHC class I antigen (Fragment)                                                                                                                                                                               | 42                       | 0                        | 0    | 11   | 7    | 16   | 0    | 0    | 0    | 0    | -30.9                      | 95% (< 0.00010)      |
| P20592                   | MX2                      | Interferon-induced GTP-binding protein Mx2 (Interferon-regulated resistance GTP-binding protein MxB) (Myxovirus resistance protein 2) (p78-related protein)                                                  | 28                       | 0                        | 0    | 0    | 3    | 22   | 0    | 0    | 0    | 0    | -20.9                      | 95% (< 0.00010)      |
| B0QZ43                   | ERLIN1                   | Erlin-1 (Fragment)                                                                                                                                                                                           | 19                       | 0                        | 7    | 4    | 3    | 0    | 0    | 0    | 0    | 0    | -14.5                      | 95% (< 0.00010)      |
| H0Y3C5                   | HCK                      | Tyrosine-protein kinase HCK                                                                                                                                                                                  | 19                       | 0                        | 2    | 2    | 2    | 2    | 0    | 0    | 0    | 0    | -14.5                      | 95% (< 0.00010)      |
| P02549                   | SPTA1                    | Spectrin alpha chain, erythrocytic 1 (Erythroid alpha-spectrin)                                                                                                                                              | 16                       | 0                        | 0    | 5    | 11   | 0    | 0    | 0    | 0    | 0    | -12.3                      | 95% (< 0.00010)      |
| Q8IVF2                   | AHNAK2                   | Protein AHNAK2                                                                                                                                                                                               | 15                       | 0                        | 15   | 0    | 0    | 0    | 0    | 0    | 0    | 0    | -11.6                      | 95% (< 0.00010)      |
| Q9HSV8                   | CDCP1                    | CUB domain-containing protein 1 (Membrane glycoprotein gp140) (Subtractive immunization M plus Hep3-associated 135 kDa protein) (SIMA135) (Transmembrane and associated with src kinases) (CD antigen CD318) | 14                       | 0                        | 1    | 6    | 7    | 0    | 0    | 0    | 0    | 0    | -10.9                      | 95% (0.00014)        |

|        |       |                                                                                                                                                              |    |   |    |   |    |   |   |   |   |   |   |       |               |
|--------|-------|--------------------------------------------------------------------------------------------------------------------------------------------------------------|----|---|----|---|----|---|---|---|---|---|---|-------|---------------|
| P00488 | F13A1 | Coagulation factor XIII<br>A chain (Coagulation factor XIIIa) (EC 2.3.2.13) (Protein-glutamine gamma-glutamyltransferase A chain) (Transglutaminase A chain) | 14 | 0 | 0  | 4 | 10 | 0 | 0 | 0 | 0 | 0 | 0 | -10.9 | 95% (0.00014) |
| O60449 | LY75  | Lymphocyte antigen 75 (Ly-75) (C-type lectin domain family 13 member B) (DEC-205) (gp200-MR6) (CD antigen CD205)                                             | 14 | 0 | 1  | 4 | 9  | 0 | 0 | 0 | 0 | 0 | 0 | -10.9 | 95% (0.00014) |
| Q9ULV0 | MYO5B | Unconventional myosin-Vb                                                                                                                                     | 14 | 0 | 12 | 2 | 0  | 0 | 0 | 0 | 0 | 0 | 0 | -10.9 | 95% (0.00014) |
| A8K7T0 |       | Kynureninase (EC 3.7.1.3)                                                                                                                                    | 13 | 0 | 0  | 6 | 8  | 0 | 0 | 0 | 0 | 0 | 0 | -10.2 | 95% (0.00026) |
| O95758 | PTBP3 | Polypyrimidine tract-binding protein 3 (Regulator of differentiation 1) (Rof1)                                                                               | 12 | 0 | 0  | 4 | 0  | 3 | 0 | 0 | 0 | 0 | 0 | -9.5  | 95% (0.00048) |
| F6M9T7 | IDO1  | Indolamine 2,3 dioxygenase (EC 1.13.11.52)                                                                                                                   | 11 | 0 | 0  | 6 | 5  | 0 | 0 | 0 | 0 | 0 | 0 | -8.8  | 95% (0.00091) |
| Q9Y2J8 | PADI2 | Protein-arginine deiminase type-2 (EC 3.5.3.15) (PAD-H19) (Peptidylarginine deiminase II) (Protein-arginine deiminase type II)                               | 11 | 0 | 0  | 5 | 6  | 0 | 0 | 0 | 0 | 0 | 0 | -8.8  | 95% (0.00091) |
| P35354 | PTGS2 | Prostaglandin G/H synthase 2 (EC 1.14.99.1) (Cyclooxygenase-2) (COX-2) (PHS II) (Prostaglandin H2 synthase 2) (PGH synthase 2) (PGHS-2)                      | 11 | 0 | 2  | 6 | 3  | 0 | 0 | 0 | 0 | 0 | 0 | -8.8  | 95% (0.00091) |

|        |         |                                                                                                                                                                 |    |   |    |   |   |   |   |   |   |   |      |              |
|--------|---------|-----------------------------------------------------------------------------------------------------------------------------------------------------------------|----|---|----|---|---|---|---|---|---|---|------|--------------|
|        |         | (Prostaglandin-endoperoxide synthase 2)                                                                                                                         |    |   |    |   |   |   |   |   |   |   |      |              |
| Q08AI8 | C2orf54 | Uncharacterized protein C2orf54                                                                                                                                 | 10 | 0 | 3  | 0 | 0 | 7 | 0 | 0 | 0 | 0 | -8.0 | 95% (0.0017) |
| E9PSH2 | CD55    | Complement decay-accelerating factor                                                                                                                            | 10 | 0 | 2  | 4 | 4 | 0 | 0 | 0 | 0 | 0 | -8.0 | 95% (0.0017) |
| P01859 | IGHG2   | Ig gamma-2 chain C region                                                                                                                                       | 10 | 0 | 0  | 0 | 0 | 6 | 0 | 0 | 0 | 0 | -8.0 | 95% (0.0017) |
| Q8NI35 | INADL   | InaD-like protein (Inadl protein) (hINADL) (Pals1-associated tight junction protein) (Protein associated to tight junctions)                                    | 10 | 0 | 9  | 0 | 0 | 1 | 0 | 0 | 0 | 0 | -8.0 | 95% (0.0017) |
| J3QRN6 | MYO1D   | Unconventional myosin-IId                                                                                                                                       | 10 | 0 | 10 | 0 | 0 | 0 | 0 | 0 | 0 | 0 | -8.0 | 95% (0.0017) |
| P13727 | PRG2    | Bone marrow proteoglycan (BMPG) (Proteoglycan 2) [Cleaved into: Eosinophil granule major basic protein (EMBP) (MBP) (Pregnancy-associated major basic protein)] | 10 | 0 | 4  | 0 | 0 | 6 | 0 | 0 | 0 | 0 | -8.0 | 95% (0.0017) |
| B4DZS8 |         | Peptidyl-prolyl cis-trans isomerase (Fragment)                                                                                                                  | 10 | 0 | 0  | 4 | 6 | 0 | 0 | 0 | 0 | 0 | -8.0 | 95% (0.0017) |
| Q03013 | GSTM4   | Glutathione S-transferase Mu 4 (EC 2.5.1.18) (GST class-mu 4) (GST-Mu2) (GSTM4-4)                                                                               | 9  | 0 | 0  | 2 | 0 | 7 | 0 | 0 | 0 | 0 | -7.3 | 95% (0.0033) |
| P61601 | NCALD   | Neurocalcin-delta                                                                                                                                               | 9  | 0 | 4  | 0 | 0 | 2 | 0 | 0 | 0 | 0 | -7.3 | 95% (0.0033) |
| Q5VYY1 | ANKRD22 | Ankyrin repeat domain-containing protein 22                                                                                                                     | 8  | 0 | 2  | 0 | 1 | 5 | 0 | 0 | 0 | 0 | -6.6 | 95% (0.0062) |
| Q9NUI1 | DECR2   | Peroxisomal 2,4-dienoyl-CoA reductase (pDCR) (EC 1.3.1.34) (2,4-dienoyl-CoA reductase 2)                                                                        | 8  | 0 | 4  | 0 | 0 | 4 | 0 | 0 | 0 | 0 | -6.6 | 95% (0.0062) |
| Q9UHL4 | DPP7    | Dipeptidyl peptidase 2 (EC 3.4.14.2)                                                                                                                            | 8  | 0 | 3  | 3 | 0 | 2 | 0 | 0 | 0 | 0 | -6.6 | 95% (0.0062) |

|        |         |                                                                                                                                                                                                              |   |   |   |   |   |   |   |   |   |   |      |              |
|--------|---------|--------------------------------------------------------------------------------------------------------------------------------------------------------------------------------------------------------------|---|---|---|---|---|---|---|---|---|---|------|--------------|
|        |         | (Dipeptidyl aminopeptidase II)<br>(Dipeptidyl peptidase 7)<br>(Dipeptidyl peptidase II)<br>(DPP II) (Quiescent cell proline dipeptidase)                                                                     |   |   |   |   |   |   |   |   |   |   |      |              |
| Q8WWP7 | GIMAP1  | GTPase IMAP family member 1 (Immunity-associated protein 1) (hIMAP1)                                                                                                                                         | 8 | 0 | 0 | 2 | 2 | 3 | 0 | 0 | 0 | 0 | -6.6 | 95% (0.0062) |
| E7ET40 | PLAU    | Urokinase-type plasminogen activator chain B                                                                                                                                                                 | 8 | 0 | 8 | 0 | 0 | 0 | 0 | 0 | 0 | 0 | -6.6 | 95% (0.0062) |
| G3V207 | TMCC3   | Transmembrane and coiled-coil domain family 3, isoform CRA_c (Transmembrane and coiled-coil domains protein 3)                                                                                               | 8 | 0 | 8 | 0 | 0 | 0 | 0 | 0 | 0 | 0 | -6.6 | 95% (0.0062) |
| Q8IY95 | TMEM192 | Transmembrane protein 192                                                                                                                                                                                    | 8 | 0 | 4 | 3 | 1 | 0 | 0 | 0 | 0 | 0 | -6.6 | 95% (0.0062) |
| Q8TD43 | TRPM4   | Transient receptor potential cation channel subfamily M member 4 (hTRPM4) (Calcium-activated non-selective cation channel 1) (Long transient receptor potential channel 4) (LTrpC-4) (LTrpC4) (Melastatin-4) | 8 | 0 | 8 | 0 | 0 | 0 | 0 | 0 | 0 | 0 | -6.6 | 95% (0.0062) |
| B2RC75 |         | Transmembrane channel-like protein                                                                                                                                                                           | 8 | 0 | 3 | 0 | 0 | 5 | 0 | 0 | 0 | 0 | -6.6 | 95% (0.0062) |
| O75110 | ATP9A   | Probable phospholipid-transporting ATPase IIA (EC 3.6.3.1) (ATPase class II type 9A)                                                                                                                         | 7 | 0 | 7 | 0 | 0 | 0 | 0 | 0 | 0 | 0 | -5.9 | 95% (0.012)  |
| Q96LJ7 | DHRS1   | Dehydrogenase/reductase SDR family member 1 (EC 1.1.-.-)                                                                                                                                                     | 7 | 0 | 3 | 0 | 0 | 4 | 0 | 0 | 0 | 0 | -5.9 | 95% (0.012)  |

|        |          |                                                                                                                         |   |   |   |   |   |   |   |   |   |   |      |             |
|--------|----------|-------------------------------------------------------------------------------------------------------------------------|---|---|---|---|---|---|---|---|---|---|------|-------------|
| Q8IWB1 | ITPRIP   | Inositol 1,4,5-trisphosphate receptor-interacting protein (Protein DANGER)                                              | 7 | 0 | 6 | 0 | 0 | 1 | 0 | 0 | 0 | 0 | -5.9 | 95% (0.012) |
| E9PDY6 | MUC4     | Mucin-4 beta chain                                                                                                      | 7 | 0 | 6 | 1 | 0 | 0 | 0 | 0 | 0 | 0 | -5.9 | 95% (0.012) |
| Q9NQX4 | MYO5C    | Unconventional myosin-Vc                                                                                                | 7 | 0 | 7 | 0 | 0 | 0 | 0 | 0 | 0 | 0 | -5.9 | 95% (0.012) |
| Q7L523 | RRAGA    | Ras-related GTP-binding protein A (Rag A) (RagA) (Adenovirus E3 14.7 kDa-interacting protein 1) (FIP-1)                 | 7 | 0 | 1 | 1 | 3 | 2 | 0 | 0 | 0 | 0 | -5.9 | 95% (0.012) |
| Q13363 | CTBP1    | C-terminal-binding protein 1 (CTBP1) (EC 1.1.1.-)                                                                       | 6 | 0 | 0 | 1 | 3 | 2 | 0 | 0 | 0 | 0 | -5.2 | 95% (0.022) |
| E7ET76 | GGT1     | Gamma-glutamyltranspeptidase 1 light chain (Fragment)                                                                   | 6 | 0 | 3 | 1 | 2 | 0 | 0 | 0 | 0 | 0 | -5.2 | 95% (0.022) |
| Q5T601 | GPR110   | Probable G-protein coupled receptor 110 (G-protein coupled receptor KPG_012) (G-protein coupled receptor PGR19)         | 6 | 0 | 4 | 0 | 0 | 2 | 0 | 0 | 0 | 0 | -5.2 | 95% (0.022) |
| B7ZKT9 | KIAA1033 | KIAA1033 protein                                                                                                        | 6 | 0 | 5 | 0 | 0 | 1 | 0 | 0 | 0 | 0 | -5.2 | 95% (0.022) |
| A2BDK6 | MAP1B    | Microtubule-associated protein 1B (Microtubule-associated protein 1B, isoform CRA_a)                                    | 6 | 0 | 2 | 1 | 3 | 0 | 0 | 0 | 0 | 0 | -5.2 | 95% (0.022) |
| C9JS50 | STEAP4   | Metalloreductase STEAP4 (Uncharacterized protein)                                                                       | 6 | 0 | 0 | 2 | 1 | 3 | 0 | 0 | 0 | 0 | -5.2 | 95% (0.022) |
| E5KNQ5 | TK2      | Mitochondrial thymidine kinase 2 (Thymidine kinase 2, mitochondrial) (Thymidine kinase 2, mitochondrial, isoform CRA_e) | 6 | 0 | 2 | 2 | 1 | 1 | 0 | 0 | 0 | 0 | -5.2 | 95% (0.022) |
| Q16864 | ATP6V1F  | V-type proton ATPase subunit F (V-ATPase)                                                                               | 5 | 0 | 1 | 1 | 1 | 2 | 0 | 0 | 0 | 0 | -4.5 | 95% (0.042) |

|        |          |                                                                                                                                                 |   |   |   |   |   |   |   |   |   |   |      |             |
|--------|----------|-------------------------------------------------------------------------------------------------------------------------------------------------|---|---|---|---|---|---|---|---|---|---|------|-------------|
|        |          | subunit F) (V-ATPase 14 kDa subunit) (Vacuolar proton pump subunit F)                                                                           |   |   |   |   |   |   |   |   |   |   |      |             |
| Q9Y3E8 | C17orf25 | CGI-150 protein                                                                                                                                 | 5 | 0 | 0 | 2 | 1 | 2 | 0 | 0 | 0 | 0 | -4.5 | 95% (0.042) |
| Q96N67 | DOCK7    | Dedicator of cytokinesis protein 7                                                                                                              | 5 | 0 | 1 | 0 | 3 | 1 | 0 | 0 | 0 | 0 | -4.5 | 95% (0.042) |
| P11678 | EPX      | Eosinophil peroxidase (EPO) (EC 1.11.1.7) [Cleaved into: Eosinophil peroxidase light chain; Eosinophil peroxidase heavy chain]                  | 5 | 0 | 2 | 0 | 0 | 3 | 0 | 0 | 0 | 0 | -4.5 | 95% (0.042) |
| Q9NPD3 | EXOSC4   | Exosome complex component RRP41 (Exosome component 4) (Ribosomal RNA-processing protein 41) (p12A)                                              | 5 | 0 | 0 | 3 | 0 | 2 | 0 | 0 | 0 | 0 | -4.5 | 95% (0.042) |
| Q96J02 | ITCH     | E3 ubiquitin-protein ligase Itchy homolog (Itch) (EC 6.3.2.-) (Atrophin-1-interacting protein 4) (AIP4) (NFE2-associated polypeptide 1) (NAPP1) | 5 | 0 | 1 | 1 | 3 | 0 | 0 | 0 | 0 | 0 | -4.5 | 95% (0.042) |
| B2ZGL7 | MGLL     | Monoacylglycerol lipase isoform 2                                                                                                               | 5 | 0 | 4 | 1 | 0 | 0 | 0 | 0 | 0 | 0 | -4.5 | 95% (0.042) |
| Q9BXB4 | OSBPL11  | Oxysterol-binding protein-related protein 11 (ORP-11) (OSBP-related protein 11)                                                                 | 5 | 0 | 1 | 1 | 2 | 1 | 0 | 0 | 0 | 0 | -4.5 | 95% (0.042) |
| P41247 | PNPLA4   | Patatin-like phospholipase domain-containing protein 4 (EC 3.1.1.3) (Protein GS2)                                                               | 5 | 0 | 4 | 0 | 1 | 0 | 0 | 0 | 0 | 0 | -4.5 | 95% (0.042) |
| O75298 | RTN2     | Reticulon-2 (Neuroendocrine-specific protein-like 1) (NSP-like protein 1) (Neuroendocrine-specific                                              | 5 | 0 | 3 | 0 | 0 | 2 | 0 | 0 | 0 | 0 | -4.5 | 95% (0.042) |

|        |          | protein-like I) (NSP-like protein I) (NSPLI)                                                                                        |   |   |   |   |   |   |   |   |   |   |   |      |             |
|--------|----------|-------------------------------------------------------------------------------------------------------------------------------------|---|---|---|---|---|---|---|---|---|---|---|------|-------------|
| Q14BN4 | SLMAP    | Sarcolemmal membrane-associated protein (Sarcolemmal-associated protein)                                                            | 5 | 0 | 5 | 0 | 0 | 0 | 0 | 0 | 0 | 0 | 0 | -4.5 | 95% (0.042) |
| Q5W111 | SPRYD7   | SPRY domain-containing protein 7 (Chronic lymphocytic leukemia deletion region gene 6 protein) (CLL deletion region gene 6 protein) | 5 | 0 | 4 | 1 | 0 | 0 | 0 | 0 | 0 | 0 | 0 | -4.5 | 95% (0.042) |
| C9K0W8 | STX16    | Syntaxin-16 (Uncharacterized protein)                                                                                               | 5 | 0 | 3 | 1 | 1 | 0 | 0 | 0 | 0 | 0 | 0 | -4.5 | 95% (0.042) |
| Q9C0C2 | TNKS1BP1 | 182 kDa tankyrase-1-binding protein                                                                                                 | 5 | 0 | 2 | 1 | 2 | 0 | 0 | 0 | 0 | 0 | 0 | -4.5 | 95% (0.042) |
| Q53GD8 |          | Peptidyl-prolyl cis-trans isomerase (Fragment)                                                                                      | 5 | 0 | 0 | 1 | 0 | 4 | 0 | 0 | 0 | 0 | 0 | -4.5 | 95% (0.042) |

<sup>A</sup>Obtained from UniProt (<http://www.uniprot.org/>) databases

<sup>C</sup>Spectral counts (SpC) in CN datasets (combined)

<sup>D</sup>Spectral counts (SpC) in CR datasets (combined)

<sup>E</sup>Spectral count ratio (Rsc) between CR (combined) and CN (combined)

<sup>F</sup>Statistical significance (p-value) (Fisher's Exact Test)

**Table S5.** Proteins identified as unique to CR samples.

| Uniprot Acc <sup>A</sup> | Gene Symbol <sup>A</sup> | Protein Description <sup>A</sup>                                                                                                                                             | CN_Combined <sup>C</sup> | CR_Combined <sup>D</sup> | CN_1 | CN_2 | CN_3 | CN_4 | CR_1 | CR_2 | CR_3 | CR_4 | RSC (CR / CN) <sup>E</sup> | p value <sup>F</sup> |
|--------------------------|--------------------------|------------------------------------------------------------------------------------------------------------------------------------------------------------------------------|--------------------------|--------------------------|------|------|------|------|------|------|------|------|----------------------------|----------------------|
| P23378                   | GLDC                     | Glycine dehydrogenase [decarboxylating], mitochondrial (EC 1.4.4.2) (Glycine cleavage system P protein) (Glycine decarboxylase)                                              | 0                        | 21                       | 0    | 0    | 0    | 0    | 20   | 0    | 0    | 2    | 19.9                       | 95% (< 0.00010)      |
| P21266                   | GSTM3                    | Glutathione S-transferase Mu 3 (EC 2.5.1.18) (GST class-mu 3) (GSTM3-3) (hGSTM3-3)                                                                                           | 0                        | 21                       | 0    | 0    | 0    | 0    | 3    | 14   | 4    | 0    | 19.9                       | 95% (< 0.00010)      |
| Q56FN6                   | HLA-DRB1                 | MHC class II antigen                                                                                                                                                         | 0                        | 16                       | 0    | 0    | 0    | 0    | 0    | 9    | 0    | 0    | 15.5                       | 95% (< 0.00010)      |
| Q13085                   | ACACA                    | Acetyl-CoA carboxylase 1 (ACC1) (EC 6.4.1.2) (ACC-alpha) [Includes: Biotin carboxylase (EC 6.3.4.14)]                                                                        | 0                        | 13                       | 0    | 0    | 0    | 0    | 12   | 0    | 0    | 0    | 12.8                       | 95% (< 0.00010)      |
| Q52NV4                   | HRS                      | Histidyl-tRNA synthetase                                                                                                                                                     | 0                        | 12                       | 0    | 0    | 0    | 0    | 6    | 0    | 2    | 0    | 11.9                       | 95% (0.00012)        |
| C9J837                   | RAB3GAP1                 | Rab3 GTPase-activating protein catalytic subunit                                                                                                                             | 0                        | 11                       | 0    | 0    | 0    | 0    | 0    | 9    | 2    | 0    | 11.0                       | 95% (0.00025)        |
| P42771                   | CDKN2A                   | Cyclin-dependent kinase inhibitor 2A, isoforms 1/2/3 (Cyclin-dependent kinase 4 inhibitor A) (CDK4I) (Multiple tumor suppressor 1) (MTS-1) (p16-INK4a) (p16-INK4) (p16INK4A) | 0                        | 9                        | 0    | 0    | 0    | 0    | 3    | 6    | 0    | 0    | 9.2                        | 95% (0.0011)         |
| B4DF41                   | MSH6                     | DNA mismatch repair protein Msh6 (cDNA FLJ55677, highly similar to DNA mismatch repair protein MSH6)                                                                         | 0                        | 9                        | 0    | 0    | 0    | 0    | 8    | 0    | 1    | 0    | 9.2                        | 95% (0.0011)         |
| B3KMS0                   |                          | Condensin complex subunit 1                                                                                                                                                  | 0                        | 9                        | 0    | 0    | 0    | 0    | 8    | 0    | 1    | 0    | 9.2                        | 95% (0.0011)         |
| Q86YH3                   | EARS2                    | EARS2 protein                                                                                                                                                                | 0                        | 8                        | 0    | 0    | 0    | 0    | 1    | 0    | 2    | 4    | 8.3                        | 95% (0.0024)         |
| D6RE83                   | UCHL1                    | Ubiquitin carboxyl-terminal hydrolase isozyme L1                                                                                                                             | 0                        | 8                        | 0    | 0    | 0    | 0    | 0    | 5    | 3    | 0    | 8.3                        | 95% (0.0024)         |



|        |        |                                                                                                                                                                                                                                                                                                                                                                           |   |   |   |   |   |   |   |   |   |   |     |              |
|--------|--------|---------------------------------------------------------------------------------------------------------------------------------------------------------------------------------------------------------------------------------------------------------------------------------------------------------------------------------------------------------------------------|---|---|---|---|---|---|---|---|---|---|-----|--------------|
| Q04828 | AKRIC1 | Aldo-keto reductase family 1 member C1 (EC 1.1.1.-) (20-alpha-hydroxysteroid dehydrogenase) (20-alpha-HSD) (EC 1.1.1.149) (Chlordecone reductase homolog HAKRC) (Dihydrodiol dehydrogenase 1/2) (DD1/DD2) (High-affinity hepatic bile acid-binding protein) (HBAB) (Indanol dehydrogenase) (EC 1.1.1.112) (Trans-1,2-dihydrobenzene-1,2-diol dehydrogenase) (EC 1.3.1.20) | 0 | 7 | 0 | 0 | 0 | 0 | 0 | 6 | 1 | 0 | 7.4 | 95% (0.0051) |
| P55285 | CDH6   | Cadherin-6 (Kidney cadherin) (K-cadherin)                                                                                                                                                                                                                                                                                                                                 | 0 | 7 | 0 | 0 | 0 | 0 | 4 | 0 | 1 | 2 | 7.4 | 95% (0.0051) |
| P36405 | ARL3   | ADP-ribosylation factor-like protein 3                                                                                                                                                                                                                                                                                                                                    | 0 | 6 | 0 | 0 | 0 | 0 | 1 | 4 | 1 | 0 | 6.5 | 95% (0.011)  |
| B4DIH5 | COPS2  | COP9 signalosome complex subunit 2 (cDNA FLJ52928, highly similar to COP9 signalosome complex subunit 2)                                                                                                                                                                                                                                                                  | 0 | 6 | 0 | 0 | 0 | 0 | 3 | 2 | 1 | 0 | 6.5 | 95% (0.011)  |
| D3DNT9 | EPHB3  | EPH receptor B3, isoform CRA_a                                                                                                                                                                                                                                                                                                                                            | 0 | 6 | 0 | 0 | 0 | 0 | 4 | 0 | 2 | 0 | 6.5 | 95% (0.011)  |
| P21397 | MAOA   | Amine oxidase [flavin-containing] A (EC 1.4.3.4) (Monoamine oxidase type A) (MAO-A)                                                                                                                                                                                                                                                                                       | 0 | 6 | 0 | 0 | 0 | 0 | 0 | 3 | 0 | 3 | 6.5 | 95% (0.011)  |
| Q14669 | TRIP12 | E3 ubiquitin-protein ligase TRIP12 (EC 6.3.2.-) (E3 ubiquitin-protein ligase for Arf) (ULF) (Thyroid receptor-interacting protein 12) (TR-interacting protein 12) (TRIP-12)                                                                                                                                                                                               | 0 | 6 | 0 | 0 | 0 | 0 | 2 | 0 | 4 | 0 | 6.5 | 95% (0.011)  |
| A8K984 |        | Structural maintenance of chromosomes protein                                                                                                                                                                                                                                                                                                                             | 0 | 6 | 0 | 0 | 0 | 0 | 4 | 0 | 1 | 0 | 6.5 | 95% (0.011)  |

|        |       |                                                                                                                                                                                                                                                                                                    |   |   |   |   |   |   |   |   |   |   |     |             |
|--------|-------|----------------------------------------------------------------------------------------------------------------------------------------------------------------------------------------------------------------------------------------------------------------------------------------------------|---|---|---|---|---|---|---|---|---|---|-----|-------------|
| P11766 | ADH5  | Alcohol dehydrogenase class-3 (EC 1.1.1.1) (Alcohol dehydrogenase 5) (Alcohol dehydrogenase class chi chain) (Alcohol dehydrogenase class-III) (Glutathione-dependent formaldehyde dehydrogenase) (FALDH) (FDH) (GSH-FDH) (EC 1.1.1.-) (S-(hydroxymethyl)glutathione dehydrogenase) (EC 1.1.1.284) | 0 | 5 | 0 | 0 | 0 | 0 | 2 | 3 | 0 | 0 | 5.6 | 95% (0.023) |
| B7ZMD7 | AMY1A | Amylase, alpha 1A (Salivary)                                                                                                                                                                                                                                                                       | 0 | 5 | 0 | 0 | 0 | 0 | 0 | 5 | 0 | 0 | 5.6 | 95% (0.023) |
| O14965 | AURKA | Aurora kinase A (EC 2.7.11.1) (Aurora 2) (Aurora/IPL1-related kinase 1) (ARK-1) (Aurora-related kinase 1) (hARK1) (Breast tumor-amplified kinase) (Serine/threonine-protein kinase 15) (Serine/threonine-protein kinase 6) (Serine/threonine-protein kinase aurora-A)                              | 0 | 5 | 0 | 0 | 0 | 0 | 0 | 3 | 1 | 0 | 5.6 | 95% (0.023) |
| Q96GD4 | AURKB | Aurora kinase B (EC 2.7.11.1) (Aurora 1) (Aurora- and IPL1-like midbody-associated protein 1) (AIM-1) (Aurora/IPL1-related kinase 2) (ARK-2) (Aurora-related kinase 2) (STK-1) (Serine/threonine-protein kinase 12) (Serine/threonine-protein kinase 5) (Serine/threonine-protein kinase aurora-B) | 0 | 5 | 0 | 0 | 0 | 0 | 1 | 0 | 4 | 0 | 5.6 | 95% (0.023) |
| O43708 | GSTZ1 | Maleylacetoacetate isomerase (MAAI) (EC 5.2.1.2) (GSTZ1-1) (Glutathione S-transferase zeta 1) (EC 2.5.1.18)                                                                                                                                                                                        | 0 | 5 | 0 | 0 | 0 | 0 | 2 | 1 | 2 | 0 | 5.6 | 95% (0.023) |

|        |          |                                                                                                                                                                                                                          |   |   |   |   |   |   |   |   |   |   |     |             |
|--------|----------|--------------------------------------------------------------------------------------------------------------------------------------------------------------------------------------------------------------------------|---|---|---|---|---|---|---|---|---|---|-----|-------------|
| Q86Y56 | HEATR2   | HEAT repeat-containing protein 2                                                                                                                                                                                         | 0 | 5 | 0 | 0 | 0 | 0 | 1 | 2 | 1 | 0 | 5.6 | 95% (0.023) |
| Q68E01 | INTS3    | Integrator complex subunit 3 (Int3) (SOSS complex subunit A) (Sensor of single-strand DNA complex subunit A) (SOSS-A) (Sensor of ssDNA subunit A)                                                                        | 0 | 5 | 0 | 0 | 0 | 0 | 1 | 1 | 2 | 1 | 5.6 | 95% (0.023) |
| Q15397 | KIAA0020 | Pumilio domain-containing protein KIAA0020 (HBV X-transactivated gene 5 protein) (HBV XAg-transactivated protein 5) (Minor histocompatibility antigen HA-8) (HLA-HA8)                                                    | 0 | 5 | 0 | 0 | 0 | 0 | 2 | 2 | 1 | 0 | 5.6 | 95% (0.023) |
| E7ESY4 | MTA1     | Metastasis-associated protein MTA1                                                                                                                                                                                       | 0 | 5 | 0 | 0 | 0 | 0 | 1 | 0 | 3 | 0 | 5.6 | 95% (0.023) |
| Q9Y263 | PLAA     | Phospholipase A-2-activating protein (PLA2P) (PLAP)                                                                                                                                                                      | 0 | 5 | 0 | 0 | 0 | 0 | 2 | 3 | 0 | 0 | 5.6 | 95% (0.023) |
| E9PKF6 | PPP6R3   | Serine/threonine-protein phosphatase 6 regulatory subunit 3                                                                                                                                                              | 0 | 5 | 0 | 0 | 0 | 0 | 0 | 4 | 1 | 0 | 5.6 | 95% (0.023) |
| Q9C0C9 | UBE2O    | Ubiquitin-conjugating enzyme E2 O (EC 6.3.2.19) (Ubiquitin carrier protein O) (Ubiquitin-conjugating enzyme E2 of 230 kDa) (Ubiquitin-conjugating enzyme E2-230K) (Ubiquitin-protein ligase O)                           | 0 | 5 | 0 | 0 | 0 | 0 | 0 | 4 | 1 | 0 | 5.6 | 95% (0.023) |
| Q59GW6 |          | Acetyl-CoA acetyltransferase, cytosolic variant (Fragment)                                                                                                                                                               | 0 | 5 | 0 | 0 | 0 | 0 | 5 | 0 | 0 | 0 | 5.6 | 95% (0.023) |
| Q9NZJ6 | COQ3     | Hexaprenyldihydrobenzoate methyltransferase, mitochondrial (EC 2.1.1.114) (2-polyprenyl-6-hydroxyphenol methylase) (EC 2.1.1.222) (3,4-dihydroxy-5-hexaprenylbenzoate methyltransferase) (DHHB methyltransferase) (DHHB- | 0 | 4 | 0 | 0 | 0 | 0 | 4 | 0 | 0 | 0 | 4.7 | 95% (0.049) |

|        |        |                                                                                                                                                                                                     |   |   |   |   |   |   |   |   |   |   |     |             |
|--------|--------|-----------------------------------------------------------------------------------------------------------------------------------------------------------------------------------------------------|---|---|---|---|---|---|---|---|---|---|-----|-------------|
|        |        | MT) (DHHB-MTase) (3-demethylubiquinone-10 3-methyltransferase) (EC 2.1.1.64)<br>(Dihydroxyhexaprenylbenzoate methyltransferase)                                                                     |   |   |   |   |   |   |   |   |   |   |     |             |
| P29762 | CRABP1 | Cellular retinoic acid-binding protein 1 (Cellular retinoic acid-binding protein I) (CRABP-I)                                                                                                       | 0 | 4 | 0 | 0 | 0 | 0 | 0 | 4 | 0 | 0 | 4.7 | 95% (0.049) |
| P02741 | CRP    | C-reactive protein [Cleaved into: C-reactive protein(1-205)]                                                                                                                                        | 0 | 4 | 0 | 0 | 0 | 0 | 0 | 0 | 0 | 4 | 4.7 | 95% (0.049) |
| P48507 | GCLM   | Glutamate--cysteine ligase regulatory subunit (GCS light chain) (Gamma-ECS regulatory subunit) (Gamma-glutamylcysteine synthetase regulatory subunit) (Glutamate--cysteine ligase modifier subunit) | 0 | 4 | 0 | 0 | 0 | 0 | 0 | 4 | 0 | 0 | 4.7 | 95% (0.049) |
| Q96IJ6 | GMPPA  | Mannose-1-phosphate guanylyltransferase alpha (EC 2.7.7.13) (GDP-mannose pyrophosphorylase A) (GTP-mannose-1-phosphate guanylyltransferase alpha)                                                   | 0 | 4 | 0 | 0 | 0 | 0 | 0 | 2 | 1 | 1 | 4.7 | 95% (0.049) |
| Q9BYC9 | MRPL20 | 39S ribosomal protein L20, mitochondrial (L20mt) (MRP-L20)                                                                                                                                          | 0 | 4 | 0 | 0 | 0 | 0 | 1 | 1 | 0 | 2 | 4.7 | 95% (0.049) |
| Q9UKX7 | NUP50  | Nuclear pore complex protein Nup50 (50 kDa nucleoporin) (Nuclear pore-associated protein 60 kDa-like) (Nucleoporin Nup50)                                                                           | 0 | 4 | 0 | 0 | 0 | 0 | 2 | 0 | 2 | 0 | 4.7 | 95% (0.049) |
| E7EU94 | PRPF31 | U4/U6 small nuclear ribonucleoprotein Prp31 (Fragment)                                                                                                                                              | 0 | 4 | 0 | 0 | 0 | 0 | 2 | 2 | 0 | 0 | 4.7 | 95% (0.049) |
| P26022 | PTX3   | Pentraxin-related protein PTX3 (Pentaxin-related protein PTX3) (Tumor necrosis factor                                                                                                               | 0 | 4 | 0 | 0 | 0 | 0 | 1 | 0 | 3 | 0 | 4.7 | 95% (0.049) |

|        |          |                                                                                                                                                                                                                                                                                                                              |   |   |   |   |   |   |   |   |   |   |     |             |
|--------|----------|------------------------------------------------------------------------------------------------------------------------------------------------------------------------------------------------------------------------------------------------------------------------------------------------------------------------------|---|---|---|---|---|---|---|---|---|---|-----|-------------|
|        |          | alpha-induced protein 5) (TNF<br>alpha-induced protein 5)<br>(Tumor necrosis factor-<br>inducible gene 14 protein)<br>(TSG-14)                                                                                                                                                                                               |   |   |   |   |   |   |   |   |   |   |     |             |
| Q96AH8 | RAB7B    | Ras-related protein Rab-7b                                                                                                                                                                                                                                                                                                   | 0 | 4 | 0 | 0 | 0 | 0 | 0 | 0 | 0 | 4 | 4.7 | 95% (0.049) |
| J3KNH7 | SENP3    | Sentrin-specific protease 3                                                                                                                                                                                                                                                                                                  | 0 | 4 | 0 | 0 | 0 | 0 | 2 | 0 | 2 | 0 | 4.7 | 95% (0.049) |
| Q96K37 | SLC35E1  | Solute carrier family 35<br>member E1                                                                                                                                                                                                                                                                                        | 0 | 4 | 0 | 0 | 0 | 0 | 0 | 2 | 0 | 2 | 4.7 | 95% (0.049) |
| Q15599 | SLC9A3R2 | Na(+)/H(+) exchange<br>regulatory cofactor NHE-RF2<br>(NHERF-2) (NHE3 kinase A<br>regulatory protein E3KARP)<br>(SRY-interacting protein 1)<br>(SIP-1) (Sodium-hydrogen<br>exchanger regulatory factor 2)<br>(Solute carrier family 9<br>isoform A3 regulatory factor 2)<br>(Tyrosine kinase activator<br>protein 1) (TKA-1) | 0 | 4 | 0 | 0 | 0 | 0 | 2 | 0 | 1 | 1 | 4.7 | 95% (0.049) |
| A8KAM9 |          | Peptidyl-prolyl cis-trans<br>isomerase E (PPIase E) (EC<br>5.2.1.8)                                                                                                                                                                                                                                                          | 0 | 4 | 0 | 0 | 0 | 0 | 2 | 0 | 2 | 0 | 4.7 | 95% (0.049) |

<sup>A</sup>Obtained from UniProt (<http://www.uniprot.org/>) databases

<sup>C</sup>Spectral counts (SpC) in CN datasets (combined)

<sup>D</sup>Spectral counts (SpC) in CR datasets (combined)

<sup>E</sup>Spectral count ratio (Rsc) between CR (combined) and CN (combined)

<sup>F</sup>Statistical significance (p-value) (Fisher's Exact Test)

**Table S6.** Proteins which meet the selection criteria and are identified in both CN and CR samples.

| Uniprot Acc <sup>A</sup> | Gene Symbol <sup>A</sup> | Protein Description <sup>A</sup>                                                                                                                                                                             | CN_Combined <sup>C</sup> | CR_Combined <sup>D</sup> | CN_1 | CN_2 | CN_3 | CN_4 | CR_1 | CR_2 | CR_3 | CR_4 | RSC (CR / CN) <sup>E</sup> | p value <sup>F</sup> |
|--------------------------|--------------------------|--------------------------------------------------------------------------------------------------------------------------------------------------------------------------------------------------------------|--------------------------|--------------------------|------|------|------|------|------|------|------|------|----------------------------|----------------------|
| Q99715                   | COL12A1                  | Collagen alpha-1(XII) chain                                                                                                                                                                                  | 1                        | 23                       | 0    | 0    | 1    | 0    | 12   | 1    | 6    | 4    | 12.1                       | 95% (< 0.00010)      |
| P08243                   | ASNS                     | Asparagine synthetase [glutamine-hydrolyzing] (EC 6.3.5.4) (Cell cycle control protein TS11) (Glutamine-dependent asparagine synthetase)                                                                     | 1                        | 20                       | 0    | 0    | 1    | 0    | 9    | 10   | 1    | 0    | 10.6                       | 95% (< 0.00010)      |
| P37268                   | FDFT1                    | Squalene synthase (SQS) (SS) (EC 2.5.1.21) (FPP:FPP farnesyltransferase) (Farnesyl-diphosphate farnesyltransferase)                                                                                          | 1                        | 12                       | 1    | 0    | 0    | 0    | 9    | 1    | 2    | 0    | 6.6                        | 95% (0.00087)        |
| O60701                   | UGDH                     | UDP-glucose 6-dehydrogenase (UDP-Glc dehydrogenase) (UDP-GlcDH) (UDPGDH) (EC 1.1.1.22)                                                                                                                       | 3                        | 23                       | 1    | 1    | 1    | 0    | 2    | 15   | 6    | 0    | 6.4                        | 95% (< 0.00010)      |
| Q96C36                   | PYCR2                    | Pyrroline-5-carboxylate reductase 2 (P5C reductase 2) (P5CR 2) (EC 1.5.1.2)                                                                                                                                  | 4                        | 26                       | 0    | 0    | 0    | 3    | 12   | 12   | 12   | 12   | 5.8                        | 95% (< 0.00010)      |
| Q9UKF6                   | CPSF3                    | Cleavage and polyadenylation specificity factor subunit 3 (EC 3.1.27.-) (Cleavage and polyadenylation specificity factor 73 kDa subunit) (CPSF 73 kDa subunit) (mRNA 3'-end-processing endonuclease CPSF-73) | 1                        | 10                       | 0    | 0    | 1    | 0    | 1    | 0    | 7    | 2    | 5.6                        | 95% (0.0034)         |
| B4DHQ3                   |                          | Phosphoserine aminotransferase (EC 2.6.1.52)                                                                                                                                                                 | 1                        | 10                       | 0    | 0    | 0    | 1    | 5    | 4    | 1    | 0    | 5.6                        | 95% (0.0034)         |
| Q8NFF5                   | FLAD1                    | FAD synthase (EC 2.7.7.2) (FAD pyrophosphorylase) (FMN adenyltransferase) (Flavin adenine dinucleotide synthase) [Includes: Molybdenum cofactor biosynthesis protein-like region; FAD synthase region]       | 3                        | 19                       | 0    | 0    | 0    | 3    | 11   | 2    | 3    | 3    | 5.3                        | 95% (0.00016)        |
| Q9Y5Q9                   | GTF3C3                   | General transcription factor 3C polypeptide 3 (Transcription factor                                                                                                                                          | 1                        | 9                        | 0    | 0    | 0    | 1    | 4    | 0    | 3    | 2    | 5.1                        | 95% (0.0065)         |

|        |         |                                                                                                                                                                                                                                 |   |    |   |   |   |   |   |   |   |   |     |               |
|--------|---------|---------------------------------------------------------------------------------------------------------------------------------------------------------------------------------------------------------------------------------|---|----|---|---|---|---|---|---|---|---|-----|---------------|
|        |         | IIIIC 102 kDa subunit (TFIIIC 102 kDa subunit) (TFIIIC102) (Transcription factor IIIIC subunit gamma) (TF3C-gamma)                                                                                                              |   |    |   |   |   |   |   |   |   |   |     |               |
| O15230 | LAMA5   | Laminin subunit alpha-5 (Laminin-10 subunit alpha) (Laminin-11 subunit alpha) (Laminin-15 subunit alpha)                                                                                                                        | 1 | 9  | 1 | 0 | 0 | 0 | 3 | 1 | 3 | 2 | 5.1 | 95% (0.0065)  |
| Q6UX53 | METTL7B | Methyltransferase-like protein 7B (EC 2.1.1.-)                                                                                                                                                                                  | 1 | 9  | 1 | 0 | 0 | 0 | 6 | 1 | 1 | 1 | 5.1 | 95% (0.0065)  |
| P52569 | SLC7A2  | Low affinity cationic amino acid transporter 2 (CAT-2) (CAT2) (Solute carrier family 7 member 2)                                                                                                                                | 1 | 9  | 1 | 0 | 0 | 0 | 1 | 3 | 2 | 3 | 5.1 | 95% (0.0065)  |
| J3KR97 | TBCD    | Tubulin-specific chaperone D                                                                                                                                                                                                    | 1 | 9  | 0 | 1 | 0 | 0 | 1 | 7 | 1 | 0 | 5.1 | 95% (0.0065)  |
| B4DMB5 |         | CTP synthase (EC 6.3.4.2) (UTP-ammonia ligase)                                                                                                                                                                                  | 1 | 9  | 0 | 0 | 0 | 1 | 5 | 5 | 0 | 0 | 5.1 | 95% (0.0065)  |
| P50851 | LRBA    | Lipopolysaccharide-responsive and beige-like anchor protein (Beige-like protein) (CDC4-like protein)                                                                                                                            | 3 | 18 | 3 | 0 | 0 | 0 | 5 | 9 | 3 | 2 | 5.1 | 95% (0.00029) |
| Q96HN2 | AHCYL2  | Putative adenosylhomocysteinase 3 (AdoHcyase 3) (EC 3.3.1.1) (S-adenosyl-L-homocysteine hydrolase 3) (S-adenosylhomocysteine hydrolase-like protein 2)                                                                          | 1 | 8  | 0 | 0 | 0 | 1 | 2 | 2 | 4 | 0 | 4.6 | 95% (0.013)   |
| O94766 | B3GAT3  | Galactosylgalactosylxylosylprotein 3-beta-glucuronosyltransferase 3 (EC 2.4.1.135) (Beta-1,3-glucuronosyltransferase 3) (Glucuronosyltransferase I) (GlcAT-I) (UDP-GlcUA:Gal beta-1,3-Gal-R glucuronosyltransferase) (GlcUAT-I) | 1 | 8  | 0 | 0 | 0 | 1 | 2 | 1 | 2 | 3 | 4.6 | 95% (0.013)   |
| O75208 | COQ9    | Ubiquinone biosynthesis protein COQ9, mitochondrial                                                                                                                                                                             | 1 | 8  | 1 | 0 | 0 | 0 | 6 | 0 | 2 | 0 | 4.6 | 95% (0.013)   |
| P14324 | FDPS    | Farnesyl pyrophosphate synthase (FPP synthase) (FPS) (EC 2.5.1.10) ((2E,6E)-farnesyl diphosphate synthase) (Dimethylallyltransferase) (EC                                                                                       | 1 | 8  | 0 | 1 | 0 | 0 | 7 | 0 | 1 | 0 | 4.6 | 95% (0.013)   |

|        |         |                                                                                                                                                                                                                           |    |    |   |   |   |    |    |    |    |    |     |                 |
|--------|---------|---------------------------------------------------------------------------------------------------------------------------------------------------------------------------------------------------------------------------|----|----|---|---|---|----|----|----|----|----|-----|-----------------|
|        |         | 2.5.1.1) (Farnesyl diphosphate synthase) (Geranyltransferase)                                                                                                                                                             |    |    |   |   |   |    |    |    |    |    |     |                 |
| B4E1G6 | GALK1   | Galactokinase (Galactokinase 1) (cDNA FLJ56840, highly similar to Galactokinase (EC 2.7.1.6))                                                                                                                             | 1  | 8  | 0 | 1 | 0 | 0  | 0  | 6  | 2  | 0  | 4.6 | 95% (0.013)     |
| A0JP11 | PIK3R4  | Phosphoinositide-3-kinase, regulatory subunit 4                                                                                                                                                                           | 1  | 8  | 0 | 1 | 0 | 0  | 5  | 2  | 1  | 0  | 4.6 | 95% (0.013)     |
| P63151 | PPP2R2A | Serine/threonine-protein phosphatase 2A 55 kDa regulatory subunit B alpha isoform (PP2A subunit B isoform B55-alpha) (PP2A subunit B isoform PR55-alpha) (PP2A subunit B isoform R2-alpha) (PP2A subunit B isoform alpha) | 1  | 8  | 1 | 0 | 0 | 0  | 3  | 4  | 2  | 0  | 4.6 | 95% (0.013)     |
| P98175 | RBM10   | RNA-binding protein 10 (G patch domain-containing protein 9) (RNA-binding motif protein 10) (RNA-binding protein S1-1) (S1-1)                                                                                             | 1  | 8  | 0 | 0 | 0 | 1  | 1  | 0  | 4  | 3  | 4.6 | 95% (0.013)     |
| E1NZA1 | PRIC295 | Peroxisome proliferator activated receptor interacting complex protein                                                                                                                                                    | 21 | 90 | 4 | 2 | 2 | 13 | 40 | 38 | 12 | 2  | 4.6 | 95% (< 0.00010) |
| Q8IWA0 | WDR75   | WD repeat-containing protein 75                                                                                                                                                                                           | 2  | 12 | 0 | 2 | 0 | 0  | 9  | 0  | 3  | 0  | 4.6 | 95% (0.0035)    |
| P36222 | CHI3L1  | Chitinase-3-like protein 1 (39 kDa synovial protein) (Cartilage glycoprotein 39) (CGP-39) (GP-39) (hCGP-39) (YKL-40)                                                                                                      | 5  | 24 | 3 | 1 | 0 | 1  | 2  | 1  | 3  | 18 | 4.5 | 95% (< 0.00010) |
| Q8TD30 | GPT2    | Alanine aminotransferase 2 (ALT2) (EC 2.6.1.2) (Glutamate pyruvate transaminase 2) (GPT 2) (Glutamic-alanine transaminase 2) (Glutamic-pyruvic transaminase 2)                                                            | 5  | 24 | 0 | 1 | 1 | 3  | 14 | 9  | 1  | 0  | 4.5 | 95% (< 0.00010) |
| Q92626 | PXDN    | Peroxidase homolog (EC 1.11.1.7) (Melanoma-associated antigen MG50) (Vascular peroxidase 1) (p53-responsive gene 2 protein)                                                                                               | 4  | 19 | 4 | 0 | 0 | 0  | 10 | 1  | 2  | 6  | 4.3 | 95% (0.00051)   |
| P61221 | ABCE1   | ATP-binding cassette sub-family E member 1 (2'-5'-oligoadenylate-binding protein) (HuHP68) (RNase L inhibitor) (Ribonuclease 4 inhibitor) (RNS4I)                                                                         | 3  | 15 | 0 | 0 | 0 | 3  | 7  | 4  | 4  | 0  | 4.3 | 95% (0.0018)    |



|        |         |                                                                                                                                                                  |    |    |   |   |   |   |    |    |    |    |     |                 |
|--------|---------|------------------------------------------------------------------------------------------------------------------------------------------------------------------|----|----|---|---|---|---|----|----|----|----|-----|-----------------|
| Q8IZV5 | RDH10   | Retinol dehydrogenase 10 (EC 1.1.1.300)                                                                                                                          | 2  | 11 | 1 | 0 | 1 | 0 | 0  | 9  | 1  | 1  | 4.2 | 95% (0.0064)    |
| Q8NBL1 | POGLUT1 | Protein O-glucosyltransferase 1 (EC 2.4.1.-) (CAP10-like 46 kDa protein) (hCLP46) (KTEL motif-containing protein 1) (Myelodysplastic syndromes relative protein) | 4  | 18 | 0 | 2 | 1 | 1 | 8  | 4  | 2  | 5  | 4.1 | 95% (0.00090)   |
| Q92905 | COPSS5  | COP9 signalosome complex subunit 5 (SGN5) (Signalosome subunit 5) (EC 3.4.-.-) (Jun activation domain-binding protein 1)                                         | 1  | 7  | 0 | 0 | 0 | 1 | 4  | 1  | 2  | 0  | 4.1 | 95% (0.024)     |
| B7Z5H3 | MAOB    | Amine oxidase [flavin-containing] B (cDNA FLJ52418, highly similar to Amine oxidase (flavin-containing) B (EC 1.4.3.4))                                          | 1  | 7  | 0 | 0 | 0 | 1 | 0  | 7  | 0  | 0  | 4.1 | 95% (0.024)     |
| Q9Y266 | NUDC    | Nuclear migration protein nudC (Nuclear distribution protein C homolog)                                                                                          | 1  | 7  | 0 | 0 | 0 | 1 | 5  | 0  | 2  | 0  | 4.1 | 95% (0.024)     |
| P00738 | HP      | Haptoglobin (Zonulin) [Cleaved into: Haptoglobin alpha chain; Haptoglobin beta chain]                                                                            | 3  | 14 | 0 | 2 | 0 | 1 | 0  | 2  | 5  | 6  | 4.0 | 95% (0.0032)    |
| P02748 | C9      | Complement component C9 [Cleaved into: Complement component C9a; Complement component C9b]                                                                       | 2  | 10 | 0 | 0 | 0 | 2 | 0  | 0  | 0  | 10 | 3.9 | 95% (0.012)     |
| Q9BSD7 | NTPCR   | Cancer-related nucleoside-triphosphatase (NTPase) (EC 3.6.1.15) (Nucleoside triphosphate phosphohydrolase)                                                       | 2  | 10 | 2 | 0 | 0 | 0 | 1  | 2  | 0  | 7  | 3.9 | 95% (0.012)     |
| Q14151 | SAFB2   | Scaffold attachment factor B2 (SAF-B2)                                                                                                                           | 2  | 10 | 2 | 0 | 0 | 0 | 6  | 0  | 2  | 2  | 3.9 | 95% (0.012)     |
| P11388 | TOP2A   | DNA topoisomerase 2-alpha (EC 5.99.1.3) (DNA topoisomerase II, alpha isozyme)                                                                                    | 20 | 68 | 0 | 9 | 9 | 2 | 26 | 18 | 14 | 10 | 3.7 | 95% (< 0.00010) |
| Q5JTZ9 | AARS2   | Alanine--tRNA ligase, mitochondrial (EC 6.1.1.7) (Alanyl-tRNA synthetase) (AlaRS)                                                                                | 1  | 6  | 1 | 0 | 0 | 0 | 5  | 0  | 0  | 1  | 3.6 | 95% (0.045)     |
| B4DQ14 | EIF2A   | Eukaryotic translation initiation factor 2A (cDNA FLJ58035, highly                                                                                               | 1  | 6  | 0 | 0 | 0 | 1 | 3  | 3  | 1  | 0  | 3.6 | 95% (0.045)     |

|        |          |                                                                                                                                                                                                                                                                                    |    |    |   |   |   |   |    |    |    |   |     |                 |
|--------|----------|------------------------------------------------------------------------------------------------------------------------------------------------------------------------------------------------------------------------------------------------------------------------------------|----|----|---|---|---|---|----|----|----|---|-----|-----------------|
|        |          | similar to Homo sapiens eukaryotic translation initiation factor (eIF) 2A (eIF2A), mRNA)                                                                                                                                                                                           |    |    |   |   |   |   |    |    |    |   |     |                 |
| Q14232 | EIF2B1   | Translation initiation factor eIF-2B subunit alpha (eIF-2B GDP-GTP exchange factor subunit alpha)                                                                                                                                                                                  | 1  | 6  | 0 | 0 | 0 | 1 | 3  | 3  | 0  | 0 | 3.6 | 95% (0.045)     |
| Q96ND0 | FAM210A  | Protein FAM210A                                                                                                                                                                                                                                                                    | 1  | 6  | 0 | 0 | 1 | 0 | 1  | 2  | 2  | 1 | 3.6 | 95% (0.045)     |
| P82675 | MRPS5    | 28S ribosomal protein S5, mitochondrial (MRP-S5) (S5mt)                                                                                                                                                                                                                            | 1  | 6  | 1 | 0 | 0 | 0 | 1  | 0  | 1  | 4 | 3.6 | 95% (0.045)     |
| B4DU97 | SLC25A17 | Peroxisomal membrane protein PMP34 (cDNA FLJ57596, highly similar to Peroxisomal membrane protein PMP34)                                                                                                                                                                           | 1  | 6  | 0 | 1 | 0 | 0 | 2  | 4  | 0  | 0 | 3.6 | 95% (0.045)     |
| Q8NCA5 | FAM98A   | Protein FAM98A                                                                                                                                                                                                                                                                     | 2  | 9  | 0 | 0 | 0 | 2 | 3  | 3  | 1  | 2 | 3.5 | 95% (0.021)     |
| Q69YN4 | KIAA1429 | Protein virilizer homolog                                                                                                                                                                                                                                                          | 2  | 9  | 0 | 1 | 1 | 0 | 2  | 0  | 7  | 0 | 3.5 | 95% (0.021)     |
| Q96T76 | MMS19    | MMS19 nucleotide excision repair protein homolog (hMMS19) (MET18 homolog) (MMS19-like protein)                                                                                                                                                                                     | 2  | 9  | 0 | 0 | 0 | 2 | 2  | 5  | 1  | 0 | 3.5 | 95% (0.021)     |
| P05165 | PCCA     | Propionyl-CoA carboxylase alpha chain, mitochondrial (PCCase subunit alpha) (EC 6.4.1.3) (Propanoyl-CoA:carbon dioxide ligase subunit alpha)                                                                                                                                       | 2  | 9  | 0 | 0 | 1 | 1 | 3  | 0  | 1  | 5 | 3.5 | 95% (0.021)     |
| P49588 | AARS     | Alanine-tRNA ligase, cytoplasmic (EC 6.1.1.7) (Alanyl-tRNA synthetase) (AlaRS) (Renal carcinoma antigen NY-REN-42)                                                                                                                                                                 | 11 | 37 | 0 | 2 | 4 | 5 | 15 | 18 | 6  | 0 | 3.5 | 95% (< 0.00010) |
| Q13131 | PRKAA1   | 5'-AMP-activated protein kinase catalytic subunit alpha-1 (AMPK subunit alpha-1) (EC 2.7.11.1) (Acetyl-CoA carboxylase kinase) (ACACA kinase) (EC 2.7.11.27) (Hydroxymethylglutaryl-CoA reductase kinase) (HMGCR kinase) (EC 2.7.11.31) (Tau-protein kinase PRKAA1) (EC 2.7.11.26) | 3  | 12 | 0 | 2 | 1 | 0 | 5  | 5  | 2  | 0 | 3.5 | 95% (0.0098)    |
| B9A018 | USP39    | U4/U6.U5 tri-snRNP-associated protein 2                                                                                                                                                                                                                                            | 3  | 12 | 1 | 0 | 2 | 0 | 0  | 0  | 11 | 1 | 3.5 | 95% (0.0098)    |

|        |              |                                                                                                                                                                                 |    |    |   |   |   |   |    |    |    |    |     |                 |
|--------|--------------|---------------------------------------------------------------------------------------------------------------------------------------------------------------------------------|----|----|---|---|---|---|----|----|----|----|-----|-----------------|
| Q59FH1 |              | Transformation/transcription domain-associated protein variant (Fragment)                                                                                                       | 3  | 12 | 1 | 0 | 0 | 2 | 2  | 0  | 9  | 1  | 3.5 | 95% (0.0098)    |
| Q9H3U1 | UNC45A       | Protein unc-45 homolog A (Unc-45A) (GCUNC-45) (Smooth muscle cell-associated protein 1) (SMAP-1)                                                                                | 4  | 15 | 0 | 0 | 0 | 4 | 2  | 8  | 4  | 0  | 3.5 | 95% (0.0047)    |
| E7EUY3 | PCCB         | Propionyl-CoA carboxylase beta chain, mitochondrial                                                                                                                             | 9  | 29 | 1 | 3 | 2 | 3 | 17 | 1  | 3  | 9  | 3.3 | 95% (0.00023)   |
| M1V485 | SLC34A2-ROS1 | Tyrosine-protein kinase receptor (EC 2.7.10.1)                                                                                                                                  | 13 | 40 | 4 | 4 | 2 | 3 | 8  | 1  | 14 | 18 | 3.2 | 95% (< 0.00010) |
| Q96KA5 | CLPTM1L      | Cleft lip and palate transmembrane protein 1-like protein (CLPTM1-like protein) (Cisplatin resistance-related protein 9) (CRR9p)                                                | 2  | 8  | 0 | 0 | 2 | 0 | 2  | 0  | 4  | 2  | 3.2 | 95% (0.037)     |
| A7J992 | PHIP         | Pleckstrin homology domain-interacting protein variant 1                                                                                                                        | 2  | 8  | 0 | 1 | 0 | 1 | 4  | 0  | 3  | 1  | 3.2 | 95% (0.037)     |
| Q96T51 | RUFY1        | RUN and FYVE domain-containing protein 1 (FYVE-finger protein EIP1) (La-binding protein 1) (Rab4-interacting protein) (Zinc finger FYVE domain-containing protein 12)           | 2  | 8  | 1 | 0 | 0 | 1 | 3  | 2  | 3  | 0  | 3.2 | 95% (0.037)     |
| B4DHJ3 |              | DNA-directed RNA polymerase (EC 2.7.7.6)                                                                                                                                        | 6  | 19 | 0 | 2 | 1 | 3 | 2  | 2  | 12 | 3  | 3.1 | 95% (0.0031)    |
| K7ELW0 | PARK7        | Protein DJ-1                                                                                                                                                                    | 5  | 16 | 1 | 1 | 2 | 1 | 5  | 5  | 3  | 3  | 3.1 | 95% (0.0065)    |
| P50895 | BCAM         | Basal cell adhesion molecule (Auberger B antigen) (B-CAM cell surface glycoprotein) (F8/G253 antigen) (Lutheran antigen) (Lutheran blood group glycoprotein) (CD antigen CD239) | 11 | 32 | 0 | 2 | 1 | 8 | 14 | 0  | 16 | 2  | 3.0 | 95% (0.00025)   |
| Q6IAX9 | SRPR         | SRPR protein                                                                                                                                                                    | 17 | 48 | 0 | 5 | 6 | 6 | 18 | 12 | 15 | 4  | 3.0 | 95% (< 0.00010) |
| F8VPD4 | CAD          | CAD protein                                                                                                                                                                     | 10 | 29 | 3 | 2 | 2 | 3 | 17 | 7  | 4  | 1  | 3.0 | 95% (0.00049)   |
| O00468 | AGRN         | Agrin [Cleaved into: Agrin N-terminal 110 kDa subunit; Agrin C-terminal 110 kDa subunit; Agrin C-terminal 90 kDa fragment (C90);                                                | 3  | 10 | 0 | 2 | 0 | 1 | 8  | 0  | 2  | 0  | 3.0 | 95% (0.029)     |

|        |       |                                                                                                                                                                                                                                                                                                                                                                                                                                                                         |    |    |   |   |   |   |   |   |    |   |     |               |
|--------|-------|-------------------------------------------------------------------------------------------------------------------------------------------------------------------------------------------------------------------------------------------------------------------------------------------------------------------------------------------------------------------------------------------------------------------------------------------------------------------------|----|----|---|---|---|---|---|---|----|---|-----|---------------|
|        |       | Agrin C-terminal 22 kDa fragment (C22)]                                                                                                                                                                                                                                                                                                                                                                                                                                 |    |    |   |   |   |   |   |   |    |   |     |               |
| F5GZS0 | DHX36 | Probable ATP-dependent RNA helicase DHX36                                                                                                                                                                                                                                                                                                                                                                                                                               | 3  | 10 | 0 | 1 | 2 | 0 | 5 | 2 | 2  | 1 | 3.0 | 95% (0.029)   |
| B4DJK9 |       | Perilipin                                                                                                                                                                                                                                                                                                                                                                                                                                                               | 3  | 10 | 1 | 0 | 1 | 1 | 0 | 1 | 3  | 6 | 3.0 | 95% (0.029)   |
| Q6NVW7 | KPNA2 | Importin subunit alpha                                                                                                                                                                                                                                                                                                                                                                                                                                                  | 13 | 36 | 0 | 3 | 8 | 2 | 5 | 8 | 18 | 5 | 2.9 | 95% (0.00016) |
| P18583 | SON   | Protein SON (Bax antagonist selected in saccharomyces 1) (BASS1) (Negative regulatory element-binding protein) (NRE-binding protein) (Protein DBP-5) (SON3)                                                                                                                                                                                                                                                                                                             | 5  | 15 | 0 | 1 | 3 | 1 | 6 | 0 | 6  | 3 | 2.9 | 95% (0.011)   |
| E7D7X9 |       | Pyroline-5-carboxylate reductase (EC 1.5.1.2)                                                                                                                                                                                                                                                                                                                                                                                                                           | 5  | 15 | 0 | 2 | 2 | 1 | 5 | 6 | 4  | 0 | 2.9 | 95% (0.011)   |
| Q53GS0 |       | Nucleolar GTP-binding protein 1 (Fragment)                                                                                                                                                                                                                                                                                                                                                                                                                              | 4  | 12 | 1 | 0 | 0 | 2 | 6 | 2 | 4  | 0 | 2.8 | 95% (0.023)   |
| P22102 | GART  | Trifunctional purine biosynthetic protein adenosine-3 [Includes: Phosphoribosylamine-glycine ligase (EC 6.3.4.13) (Glycinamide ribonucleotide synthetase) (GARS) (Phosphoribosylglycinamide synthetase); Phosphoribosylformylglycinamide cyclo-ligase (EC 6.3.3.1) (AIR synthase) (AIRS) (Phosphoribosylaminoimidazole synthetase); Phosphoribosylglycinamide formyltransferase (EC 2.1.2.2) (5'-phosphoribosylglycinamide transformylase) (GAR transformylase) (GART)] | 8  | 22 | 0 | 1 | 1 | 6 | 9 | 9 | 4  | 0 | 2.8 | 95% (0.0032)  |
| Q6IBU0 | EIF5  | EIF5 protein                                                                                                                                                                                                                                                                                                                                                                                                                                                            | 5  | 14 | 0 | 2 | 2 | 1 | 3 | 7 | 4  | 0 | 2.7 | 95% (0.017)   |
| A2RTY6 | ITIH2 | Inter-alpha (Globulin) inhibitor H2 (Inter-alpha (Globulin) inhibitor H2, isoform CRA_b) (cDNA FLJ75038, highly similar to Homo sapiens inter-alpha (globulin) inhibitor H2 (ITIH2), mRNA)                                                                                                                                                                                                                                                                              | 3  | 9  | 0 | 1 | 1 | 1 | 2 | 4 | 1  | 2 | 2.7 | 95% (0.049)   |

|        |          |                                                                                                                                                                                                                                                                                                                                    |    |     |    |    |    |    |    |     |    |    |     |                    |
|--------|----------|------------------------------------------------------------------------------------------------------------------------------------------------------------------------------------------------------------------------------------------------------------------------------------------------------------------------------------|----|-----|----|----|----|----|----|-----|----|----|-----|--------------------|
| B4E1K0 | KIF23    | Kinesin-like protein KIF23 (cDNA<br>FLJ58416, highly similar to<br>Kinesin-like protein KIF23)                                                                                                                                                                                                                                     | 3  | 9   | 0  | 2  | 1  | 0  | 2  | 1   | 4  | 2  | 2.7 | 95% (0.049)        |
| Q06AH7 | TF       | Transferrin                                                                                                                                                                                                                                                                                                                        | 34 | 83  | 1  | 11 | 10 | 12 | 27 | 13  | 30 | 14 | 2.7 | 95% (<<br>0.00010) |
| Q13057 | COASY    | Bifunctional coenzyme A synthase<br>(CoA synthase) (NBP) (POV-2)<br>[Includes: Phosphopantetheine<br>adenylyltransferase (EC 2.7.7.3)<br>(Dephospho-CoA<br>pyrophosphorylase) (Pantetheine-<br>phosphate adenylyltransferase)<br>(PPAT); Dephospho-CoA kinase<br>(DPCK) (EC 2.7.1.24)<br>(Dephosphocoenzyme A kinase)<br>(DPCOAK)] | 4  | 11  | 0  | 0  | 1  | 3  | 5  | 3   | 2  | 1  | 2.6 | 95% (0.037)        |
| O95864 | FADS2    | Fatty acid desaturase 2 (EC<br>1.14.19.-) (Delta(6) fatty acid<br>desaturase) (D6D) (Delta(6)<br>desaturase) (Delta-6 desaturase)                                                                                                                                                                                                  | 4  | 11  | 0  | 2  | 2  | 0  | 2  | 0   | 9  | 0  | 2.6 | 95% (0.037)        |
| J3KN16 | KIAA0368 | Proteasome-associated protein<br>ECM29 homolog                                                                                                                                                                                                                                                                                     | 4  | 11  | 0  | 0  | 0  | 4  | 3  | 4   | 4  | 0  | 2.6 | 95% (0.037)        |
| E9PF74 | SLC25A19 | Mitochondrial thiamine<br>pyrophosphate carrier                                                                                                                                                                                                                                                                                    | 4  | 11  | 0  | 0  | 1  | 3  | 1  | 2   | 1  | 7  | 2.6 | 95% (0.037)        |
| Q7L014 | DDX46    | Probable ATP-dependent RNA<br>helicase DDX46 (EC 3.6.4.13)<br>(DEAD box protein 46) (PRP5<br>homolog)                                                                                                                                                                                                                              | 11 | 27  | 0  | 2  | 2  | 6  | 5  | 4   | 14 | 4  | 2.6 | 95% (0.0024)       |
| P68104 | EEF1A1   | Elongation factor 1-alpha 1 (EF-1-<br>alpha-1) (Elongation factor Tu) (EF-<br>Tu) (Eukaryotic elongation factor 1<br>A-1) (eEF1A-1) (Leukocyte<br>receptor cluster member 7)                                                                                                                                                       | 96 | 222 | 13 | 28 | 24 | 32 | 26 | 137 | 40 | 22 | 2.6 | 95% (<<br>0.00010) |
| Q9H5Q4 | TFB2M    | Dimethyladenosine transferase 2,<br>mitochondrial (EC 2.1.1.-)<br>(Hepatitis C virus NSSA-<br>transactivated protein 5) (HCV<br>NSSA-transactivated protein 5)<br>(Mitochondrial 12S rRNA<br>dimethylase 2) (Mitochondrial                                                                                                         | 5  | 13  | 1  | 1  | 2  | 1  | 6  | 2   | 1  | 4  | 2.6 | 95% (0.028)        |

|        |        |                                                                                                                                                                                                                    |    |    |   |   |   |   |    |    |    |    |     |              |
|--------|--------|--------------------------------------------------------------------------------------------------------------------------------------------------------------------------------------------------------------------|----|----|---|---|---|---|----|----|----|----|-----|--------------|
|        |        | transcription factor B2) (h-mtTFB)<br>(h-mtTFB2) (hTFB2M) (mtTFB2)<br>(S-adenosylmethionine-6-N', N'-<br>adenosyl(rRNA)<br>dimethyltransferase 2)                                                                  |    |    |   |   |   |   |    |    |    |    |     |              |
| P01023 | A2M    | Alpha-2-macroglobulin (Alpha-2-<br>M) (C3 and PZP-like alpha-2-<br>macroglobulin domain-containing<br>protein 5)                                                                                                   | 9  | 22 | 0 | 1 | 7 | 1 | 2  | 1  | 6  | 12 | 2.5 | 95% (0.0062) |
| Q0VGAS | SARS   | SARS protein                                                                                                                                                                                                       | 9  | 22 | 0 | 0 | 1 | 8 | 7  | 9  | 6  | 0  | 2.5 | 95% (0.0062) |
| Q5TC12 | ATPAF1 | ATP synthase mitochondrial F1<br>complex assembly factor 1 (ATP11<br>homolog)                                                                                                                                      | 6  | 15 | 1 | 2 | 2 | 1 | 10 | 2  | 3  | 0  | 2.5 | 95% (0.021)  |
| P14174 | MIF    | Macrophage migration inhibitory<br>factor (MIF) (EC 5.3.2.1)<br>(Glycosylation-inhibiting factor)<br>(GIF) (L-dopachrome isomerase)<br>(L-dopachrome tautomerase) (EC<br>5.3.3.12) (Phenylpyruvate<br>tautomerase) | 8  | 19 | 1 | 3 | 4 | 0 | 4  | 7  | 5  | 3  | 2.5 | 95% (0.012)  |
| P07741 | APRT   | Adenine phosphoribosyltransferase<br>(APRT) (EC 2.4.2.7)                                                                                                                                                           | 14 | 32 | 1 | 3 | 5 | 5 | 9  | 15 | 4  | 4  | 2.4 | 95% (0.0017) |
| Q8NCN5 | PDPR   | Pyruvate dehydrogenase<br>phosphatase regulatory subunit,<br>mitochondrial (PDP $\beta$ )                                                                                                                          | 14 | 32 | 2 | 5 | 6 | 1 | 21 | 2  | 1  | 9  | 2.4 | 95% (0.0017) |
| Q9H0S4 | DDX47  | Probable ATP-dependent RNA<br>helicase DDX47 (EC 3.6.4.13)<br>(DEAD box protein 47)                                                                                                                                | 9  | 21 | 0 | 1 | 5 | 3 | 4  | 7  | 6  | 4  | 2.4 | 95% (0.0095) |
| P45974 | USP5   | Ubiquitin carboxyl-terminal<br>hydrolase 5 (EC 3.4.19.12)<br>(Deubiquitinating enzyme 5)<br>(Isopeptidase T) (Ubiquitin<br>thioesterase 5) (Ubiquitin-specific-<br>processing protease 5)                          | 10 | 23 | 0 | 0 | 3 | 7 | 6  | 15 | 3  | 0  | 2.4 | 95% (0.0073) |
| Q8NI27 | THOC2  | THO complex subunit 2 (Tho2)<br>(hTREX120)                                                                                                                                                                         | 11 | 25 | 1 | 2 | 4 | 3 | 7  | 1  | 12 | 5  | 2.4 | 95% (0.0056) |
| Q5W0H4 | TPST1  | Translationally-controlled tumor<br>protein                                                                                                                                                                        | 11 | 25 | 2 | 4 | 3 | 1 | 8  | 8  | 6  | 3  | 2.4 | 95% (0.0056) |
| O14976 | GAK    | Cyclin-G-associated kinase (EC<br>2.7.11.1)                                                                                                                                                                        | 5  | 12 | 0 | 1 | 2 | 3 | 3  | 6  | 3  | 0  | 2.4 | 95% (0.044)  |

|        |       |                                                                                                                                                                                                                                                                                                                                                                                                                                                         |    |    |   |   |   |   |    |    |   |   |     |                  |
|--------|-------|---------------------------------------------------------------------------------------------------------------------------------------------------------------------------------------------------------------------------------------------------------------------------------------------------------------------------------------------------------------------------------------------------------------------------------------------------------|----|----|---|---|---|---|----|----|---|---|-----|------------------|
| Q9Y4W2 | LAS1L | Ribosomal biogenesis protein<br>LAS1L (Protein LAS1 homolog)                                                                                                                                                                                                                                                                                                                                                                                            | 5  | 12 | 2 | 0 | 0 | 3 | 6  | 2  | 0 | 5 | 2.4 | 95% (0.044)      |
| A5PLK7 | RCC2  | RCC2 protein (Fragment)                                                                                                                                                                                                                                                                                                                                                                                                                                 | 6  | 14 | 0 | 1 | 1 | 4 | 8  | 4  | 2 | 0 | 2.4 | 95% (0.033)      |
| Q6URC4 |       | Diaphanous 1                                                                                                                                                                                                                                                                                                                                                                                                                                            | 7  | 16 | 0 | 3 | 3 | 1 | 7  | 2  | 5 | 1 | 2.3 | 95% (0.025)      |
| Q53GX7 |       | Threonyl-tRNA synthetase variant<br>(Fragment)                                                                                                                                                                                                                                                                                                                                                                                                          | 19 | 41 | 0 | 6 | 5 | 8 | 15 | 13 | 9 | 4 | 2.3 | 95%<br>(0.00071) |
| O15254 | ACOX3 | Peroxisomal acyl-coenzyme A<br>oxidase 3 (EC 1.3.3.6) (Branched-<br>chain acyl-CoA oxidase)<br>(BRCACox) (Pristanoyl-CoA<br>oxidase)                                                                                                                                                                                                                                                                                                                    | 8  | 18 | 7 | 0 | 1 | 0 | 1  | 8  | 3 | 6 | 2.3 | 95% (0.019)      |
| Q9UIG0 | BAZ1B | Tyrosine-protein kinase BAZ1B<br>(EC 2.7.10.2) (Bromodomain<br>adjacent to zinc finger domain<br>protein 1B) (Williams syndrome<br>transcription factor) (Williams-<br>Beuren syndrome chromosomal<br>region 10 protein) (Williams-<br>Beuren syndrome chromosomal<br>region 9 protein) (hWALp2)                                                                                                                                                        | 8  | 18 | 2 | 2 | 0 | 5 | 14 | 0  | 3 | 1 | 2.3 | 95% (0.019)      |
| P61289 | PSME3 | Proteasome activator complex<br>subunit 3 (11S regulator complex<br>subunit gamma) (REG-gamma)<br>(Activator of multicatalytic protease<br>subunit 3) (Ki nuclear autoantigen)<br>(Proteasome activator 28 subunit<br>gamma) (PA28g) (PA28gamma)                                                                                                                                                                                                        | 8  | 18 | 0 | 1 | 1 | 6 | 4  | 6  | 8 | 1 | 2.3 | 95% (0.019)      |
| P10909 | CLU   | Clusterin (Aging-associated gene 4<br>protein) (Apolipoprotein J) (Apo-J)<br>(Complement cytolysis inhibitor)<br>(CLI) (Complement-associated<br>protein SP-40,40) (Ku70-binding<br>protein 1) (NA1/NA2)<br>(Testosterone-repressed prostate<br>message 2) (TRPM-2) [Cleaved<br>into: Clusterin beta chain<br>(ApoIalpha) (Complement cytolysis<br>inhibitor a chain); Clusterin alpha<br>chain (ApoIbeta) (Complement<br>cytolysis inhibitor b chain)] | 9  | 20 | 3 | 1 | 4 | 1 | 1  | 8  | 3 | 7 | 2.3 | 95% (0.014)      |

|        |        |                                                                                                                                                                                                                                                                       |    |     |    |    |    |    |    |    |    |    |     |                 |
|--------|--------|-----------------------------------------------------------------------------------------------------------------------------------------------------------------------------------------------------------------------------------------------------------------------|----|-----|----|----|----|----|----|----|----|----|-----|-----------------|
| Q969X5 | ERGIC1 | Endoplasmic reticulum-Golgi intermediate compartment protein 1 (ER-Golgi intermediate compartment 32 kDa protein) (ERGIC-32)                                                                                                                                          | 9  | 20  | 7  | 0  | 0  | 2  | 2  | 6  | 7  | 5  | 2.3 | 95% (0.014)     |
| P18428 | LBP    | Lipopolysaccharide-binding protein (LBP)                                                                                                                                                                                                                              | 9  | 20  | 0  | 2  | 1  | 6  | 0  | 0  | 4  | 15 | 2.3 | 95% (0.014)     |
| Q4LE36 | ACLY   | ACLY variant protein (Fragment)                                                                                                                                                                                                                                       | 31 | 64  | 0  | 12 | 9  | 10 | 28 | 24 | 11 | 2  | 2.3 | 95% (< 0.00010) |
| Q96RP9 | GFM1   | Elongation factor G, mitochondrial (EF-Gmt) (Elongation factor G 1, mitochondrial) (mEF-G 1) (Elongation factor G1) (hEFG1)                                                                                                                                           | 33 | 68  | 4  | 12 | 10 | 8  | 37 | 6  | 10 | 15 | 2.3 | 95% (< 0.00010) |
| B5BTZ6 | STAT3  | Signal transducer and activator of transcription                                                                                                                                                                                                                      | 20 | 41  | 3  | 7  | 3  | 7  | 12 | 21 | 9  | 0  | 2.2 | 95% (0.0012)    |
| P54577 | YARS   | Tyrosine--tRNA ligase, cytoplasmic (EC 6.1.1.1) (Tyrosyl-tRNA synthetase) (TyrRS) [Cleaved into: Tyrosine--tRNA ligase, cytoplasmic, N-terminally processed]                                                                                                          | 9  | 19  | 0  | 3  | 3  | 3  | 7  | 8  | 3  | 1  | 2.2 | 95% (0.022)     |
| P11172 | UMPS   | Uridine 5'-monophosphate synthase (UMP synthase) [Includes: Orotate phosphoribosyltransferase (OPRT) (OPRTase) (EC 2.4.2.10); Orotidine 5'-phosphate decarboxylase (ODC) (EC 4.1.1.23) (OMPdecase)]                                                                   | 8  | 17  | 0  | 2  | 5  | 1  | 12 | 2  | 3  | 1  | 2.2 | 95% (0.029)     |
| Q53FW8 |        | TAP binding protein-like variant (Fragment)                                                                                                                                                                                                                           | 7  | 15  | 2  | 0  | 0  | 6  | 0  | 11 | 0  | 5  | 2.2 | 95% (0.038)     |
| Q53G19 |        | Mitochondrial ribosomal protein L11 isoform a variant (Fragment)                                                                                                                                                                                                      | 7  | 15  | 3  | 3  | 0  | 1  | 4  | 0  | 5  | 6  | 2.2 | 95% (0.038)     |
| P01024 | C3     | Complement C3 (C3 and PZP-like alpha-2-macroglobulin domain-containing protein 1) [Cleaved into: Complement C3 beta chain; Complement C3 alpha chain; C3a anaphylatoxin; Acylation stimulating protein (ASP) (C3adesArg); Complement C3b alpha' chain; Complement C3c | 54 | 104 | 18 | 11 | 11 | 15 | 5  | 14 | 38 | 47 | 2.1 | 95% (< 0.00010) |



|        |        |                                                                                                                                                                                                                                                        |    |    |   |   |   |   |    |    |    |   |     |              |
|--------|--------|--------------------------------------------------------------------------------------------------------------------------------------------------------------------------------------------------------------------------------------------------------|----|----|---|---|---|---|----|----|----|---|-----|--------------|
|        |        | alpha' chain fragment 1;<br>Complement C3dg fragment;<br>Complement C3g fragment;<br>Complement C3d fragment;<br>Complement C3f fragment;<br>Complement C3c alpha' chain<br>fragment 2]                                                                |    |    |   |   |   |   |    |    |    |   |     |              |
| Q7L2H7 | EIF3M  | Eukaryotic translation initiation<br>factor 3 subunit M (EIF3m) (Fetal<br>lung protein B5) (hFL-B5) (PCI<br>domain-containing protein 1)                                                                                                               | 11 | 22 | 0 | 5 | 1 | 5 | 6  | 10 | 4  | 2 | 2.1 | 95% (0.018)  |
| Q9BW92 | TARS2  | Threonine--tRNA ligase,<br>mitochondrial (EC 6.1.1.3)<br>(Threonyl-tRNA synthetase)<br>(ThrRS) (Threonyl-tRNA<br>synthetase-like 1)                                                                                                                    | 11 | 22 | 4 | 3 | 2 | 2 | 11 | 1  | 3  | 7 | 2.1 | 95% (0.018)  |
| Q9BYD6 | MRPL1  | 39S ribosomal protein L1,<br>mitochondrial (L1mt) (MRP-L1)                                                                                                                                                                                             | 9  | 18 | 5 | 1 | 3 | 0 | 8  | 3  | 3  | 4 | 2.1 | 95% (0.032)  |
| J3KQ32 | OLA1   | Obg-like ATPase 1                                                                                                                                                                                                                                      | 9  | 18 | 0 | 2 | 2 | 5 | 3  | 6  | 4  | 5 | 2.1 | 95% (0.032)  |
| Q02338 | BDH1   | D-beta-hydroxybutyrate<br>dehydrogenase, mitochondrial<br>(BDH) (EC 1.1.1.30) (3-<br>hydroxybutyrate dehydrogenase)                                                                                                                                    | 17 | 33 | 7 | 1 | 0 | 8 | 13 | 12 | 7  | 1 | 2.1 | 95% (0.0054) |
| P49792 | RANBP2 | E3 SUMO-protein ligase RanBP2<br>(EC 6.3.2.-) (358 kDa nucleoporin)<br>(Nuclear pore complex protein<br>Nup358) (Nucleoporin Nup358)<br>(Ran-binding protein 2) (RanBP2)<br>(p270)                                                                     | 17 | 33 | 2 | 4 | 4 | 7 | 7  | 6  | 15 | 5 | 2.1 | 95% (0.0054) |
| Q8IY17 | PNPLA6 | Neuropathy target esterase (EC<br>3.1.1.5) (Patatin-like phospholipase<br>domain-containing protein 6)                                                                                                                                                 | 8  | 16 | 6 | 0 | 1 | 1 | 4  | 1  | 5  | 6 | 2.1 | 95% (0.042)  |
| P52948 | NUP98  | Nuclear pore complex protein<br>Nup98-Nup96 [Cleaved into:<br>Nuclear pore complex protein<br>Nup98 (98 kDa nucleoporin)<br>(Nucleoporin Nup98) (Nup98);<br>Nuclear pore complex protein<br>Nup96 (96 kDa nucleoporin)<br>(Nucleoporin Nup96) (Nup96)] | 15 | 29 | 4 | 2 | 2 | 7 | 4  | 3  | 15 | 7 | 2.1 | 95% (0.0091) |

|        |        |                                                                                                                                                                                                                                             |     |     |    |    |    |    |    |    |    |    |      |                 |
|--------|--------|---------------------------------------------------------------------------------------------------------------------------------------------------------------------------------------------------------------------------------------------|-----|-----|----|----|----|----|----|----|----|----|------|-----------------|
| P23526 | AHCY   | Adenosylhomocysteinase (AdoHcyase) (EC 3.3.1.1) (S-adenosyl-L-homocysteine hydrolase)                                                                                                                                                       | 11  | 21  | 0  | 3  | 2  | 8  | 6  | 8  | 4  | 2  | 2.0  | 95% (0.027)     |
| A8K3C3 |        | T-complex protein 1 subunit delta                                                                                                                                                                                                           | 27  | 50  | 6  | 8  | 6  | 7  | 23 | 12 | 11 | 4  | 2.0  | 95% (0.0012)    |
| Q13505 | MTX1   | Metaxin-1 (Mitochondrial outer membrane import complex protein 1)                                                                                                                                                                           | 10  | 19  | 3  | 0  | 0  | 7  | 6  | 4  | 5  | 4  | 2.0  | 95% (0.035)     |
| B4DZ67 | NUP107 | Nuclear pore complex protein Nup107 (cDNA FLJ58739, highly similar to Nuclear pore complex protein Nup107)                                                                                                                                  | 10  | 19  | 3  | 3  | 1  | 3  | 3  | 2  | 10 | 4  | 2.0  | 95% (0.035)     |
| Q96TC7 | RMDN3  | Regulator of microtubule dynamics protein 3 (RMD-3) (hRMD-3) (Cerebral protein 10) (Protein FAM82A2) (Protein FAM82C) (Protein tyrosine phosphatase-interacting protein 51) (TCPTP-interacting protein 51)                                  | 10  | 19  | 5  | 1  | 0  | 4  | 0  | 0  | 12 | 7  | 2.0  | 95% (0.035)     |
| O15042 | U2SURP | U2 snRNP-associated SURP motif-containing protein (140 kDa Ser/Arg-rich domain protein) (U2-associated protein SR140)                                                                                                                       | 18  | 33  | 2  | 5  | 4  | 7  | 8  | 4  | 12 | 9  | 2.0  | 95% (0.0085)    |
| F1T02  | GOLGB1 | Golgin subfamily B member 1                                                                                                                                                                                                                 | 17  | 31  | 5  | 5  | 6  | 1  | 13 | 1  | 12 | 5  | 2.0  | 95% (0.011)     |
| P0C0L5 | C4B    | Complement C4-B (Basic complement C4) (C3 and PZP-like alpha-2-macroglobulin domain-containing protein 3) [Cleaved into: Complement C4 beta chain; Complement C4-B alpha chain; C4a anaphylatoxin; C4b-B; C4d-B; Complement C4 gamma chain] | 12  | 22  | 0  | 2  | 2  | 8  | 3  | 0  | 17 | 3  | 2.0  | 95% (0.029)     |
| P02786 | TFRC   | Transferrin receptor protein 1 (TR) (TR) (TfR1) (TfR) (T9) (p90) (CD antigen CD71) [Cleaved into: Transferrin receptor protein 1, serum form (sTfR)]                                                                                        | 117 | 205 | 29 | 34 | 37 | 20 | 59 | 36 | 47 | 65 | 2.0  | 95% (< 0.00010) |
| Q53EW8 |        | Thiosulfate sulfurtransferase variant (Fragment)                                                                                                                                                                                            | 30  | 13  | 12 | 8  | 6  | 4  | 7  | 3  | 0  | 3  | -2.0 | 95% (0.019)     |

|        |        |                                                                                                                                                                                     |     |     |    |     |     |     |    |    |    |    |      |                 |
|--------|--------|-------------------------------------------------------------------------------------------------------------------------------------------------------------------------------------|-----|-----|----|-----|-----|-----|----|----|----|----|------|-----------------|
| Q8NC56 | LEMD2  | LEM domain-containing protein 2 (hLEM2)                                                                                                                                             | 41  | 18  | 11 | 6   | 5   | 19  | 4  | 6  | 3  | 5  | -2.0 | 95% (0.0072)    |
| B7XGC2 | HLA-A  | MHC class I antigen (Fragment)                                                                                                                                                      | 52  | 23  | 5  | 11  | 13  | 23  | 3  | 5  | 8  | 7  | -2.0 | 95% (0.0028)    |
| P02042 | HBD    | Hemoglobin subunit delta (Delta-globin) (Hemoglobin delta chain)                                                                                                                    | 235 | 106 | 0  | 76  | 82  | 67  | 0  | 0  | 26 | 0  | -2.0 | 95% (< 0.00010) |
| Q14254 | FLOT2  | Flotillin-2 (Epidermal surface antigen) (ESA) (Membrane component chromosome 17 surface marker 1)                                                                                   | 49  | 21  | 23 | 10  | 8   | 10  | 2  | 9  | 3  | 7  | -2.0 | 95% (0.0027)    |
| H6A2E0 | HLA-B  | MHC class I antigen (Fragment)                                                                                                                                                      | 38  | 16  | 0  | 9   | 0   | 15  | 0  | 0  | 7  | 0  | -2.0 | 95% (0.0068)    |
| A0S117 | COX1   | Cytochrome c oxidase subunit 1 (EC 1.9.3.1) (Fragment)                                                                                                                              | 20  | 8   | 8  | 4   | 5   | 2   | 2  | 2  | 1  | 3  | -2.1 | 95% (0.037)     |
| P50570 | DNM2   | Dynamin-2 (EC 3.6.5.5)                                                                                                                                                              | 20  | 8   | 0  | 1   | 9   | 9   | 5  | 3  | 1  | 0  | -2.1 | 95% (0.037)     |
| Q56VL3 | OCIAD2 | OCIA domain-containing protein 2 (Ovarian carcinoma immunoreactive antigen-like protein)                                                                                            | 27  | 11  | 14 | 7   | 3   | 3   | 2  | 4  | 1  | 4  | -2.1 | 95% (0.018)     |
| Q6FGL0 | LGALS3 | Galectin (Fragment)                                                                                                                                                                 | 34  | 14  | 10 | 6   | 3   | 15  | 2  | 5  | 4  | 3  | -2.1 | 95% (0.0088)    |
| P16144 | ITGB4  | Integrin beta-4 (GP150) (CD antigen CD104)                                                                                                                                          | 39  | 16  | 30 | 4   | 4   | 1   | 2  | 0  | 2  | 12 | -2.1 | 95% (0.0050)    |
| Q9NUQ9 | FAM49B | Protein FAM49B (L1)                                                                                                                                                                 | 23  | 9   | 1  | 11  | 5   | 6   | 0  | 4  | 4  | 1  | -2.1 | 95% (0.023)     |
| C8C504 | HBB    | Beta-globin                                                                                                                                                                         | 360 | 151 | 22 | 113 | 124 | 105 | 25 | 35 | 37 | 55 | -2.1 | 95% (< 0.00010) |
| Q92520 | FAM3C  | Protein FAM3C (Interleukin-like EMT inducer)                                                                                                                                        | 50  | 20  | 18 | 10  | 8   | 14  | 4  | 5  | 5  | 6  | -2.2 | 95% (0.0012)    |
| Q9Y394 | DHRS7  | Dehydrogenase/reductase SDR family member 7 (EC 1.1.-.-) (Retinal short-chain dehydrogenase/reductase 4) (retSDR4)                                                                  | 38  | 15  | 18 | 8   | 7   | 5   | 0  | 5  | 3  | 7  | -2.2 | 95% (0.0041)    |
| Q14566 | MCM6   | DNA replication licensing factor MCM6 (EC 3.6.4.12) (p105MCM)                                                                                                                       | 19  | 7   | 0  | 9   | 11  | 0   | 5  | 1  | 1  | 0  | -2.2 | 95% (0.030)     |
| Q99653 | CHP1   | Calcineurin B homologous protein 1 (Calcineurin B-like protein) (Calcium-binding protein CHP) (Calcium-binding protein p22) (EF-hand calcium-binding domain-containing protein p22) | 24  | 9   | 12 | 3   | 4   | 5   | 1  | 3  | 1  | 3  | -2.2 | 95% (0.016)     |

|        |         |                                                                                                                                                                                                      |    |    |    |    |    |    |   |   |   |   |      |               |
|--------|---------|------------------------------------------------------------------------------------------------------------------------------------------------------------------------------------------------------|----|----|----|----|----|----|---|---|---|---|------|---------------|
| P56385 | ATP5I   | ATP synthase subunit e, mitochondrial (ATPase subunit e)                                                                                                                                             | 17 | 6  | 3  | 2  | 4  | 8  | 0 | 2 | 3 | 1 | -2.2 | 95% (0.033)   |
| Q86WA6 | BPHL    | Valacyclovir hydrolase (VACVase) (Valacyclovirase) (EC 3.1.-.-) (Biphenyl hydrolase-like protein) (Biphenyl hydrolase-related protein) (Bph-tp) (Breast epithelial mucin-associated antigen) (MCNAA) | 17 | 6  | 3  | 1  | 5  | 8  | 0 | 0 | 1 | 5 | -2.2 | 95% (0.033)   |
| Q4AEJ3 | hfzo1   | Mitochondrial transmembrane GTPase Fzo-1                                                                                                                                                             | 17 | 6  | 7  | 4  | 4  | 2  | 3 | 1 | 1 | 2 | -2.2 | 95% (0.033)   |
| P02730 | SLC4A1  | Band 3 anion transport protein (Anion exchange protein 1) (AE 1) (Anion exchanger 1) (Solute carrier family 4 member 1) (CD antigen CD233)                                                           | 63 | 24 | 3  | 27 | 26 | 7  | 5 | 2 | 9 | 8 | -2.3 | 95% (0.00016) |
| E7EVP7 | ITPR1   | Inositol 1,4,5-trisphosphate receptor type 1                                                                                                                                                         | 25 | 9  | 14 | 4  | 7  | 0  | 1 | 0 | 1 | 7 | -2.3 | 95% (0.012)   |
| E3SWK8 | HLA-C   | MHC class I antigen (Fragment)                                                                                                                                                                       | 28 | 10 | 0  | 8  | 0  | 12 | 0 | 0 | 4 | 0 | -2.3 | 95% (0.0073)  |
| P27701 | CD82    | CD82 antigen (C33 antigen) (IA4) (Inducible membrane protein R2) (Metastasis suppressor Kangai-1) (Suppressor of tumorigenicity 6 protein) (Tetraspanin-27) (Tspan-27) (CD antigen CD82)             | 44 | 16 | 13 | 12 | 15 | 4  | 5 | 1 | 5 | 5 | -2.3 | 95% (0.00097) |
| Q16555 | DPYSL2  | Dihydropyrimidinase-related protein 2 (DRP-2) (Collapsin response mediator protein 2) (CRMP-2) (N2A3) (Unc-33-like phosphoprotein 2) (ULIP-2)                                                        | 21 | 7  | 2  | 11 | 8  | 0  | 0 | 2 | 2 | 0 | -2.4 | 95% (0.014)   |
| P29728 | OAS2    | 2'-5'-oligoadenylate synthase 2 ((2-5)oligo(A) synthase 2) (2-5A synthase 2) (EC 2.7.7.84) (p69 OAS / p71 OAS) (p69OAS / p71OAS)                                                                     | 21 | 7  | 0  | 2  | 2  | 17 | 0 | 7 | 0 | 0 | -2.4 | 95% (0.014)   |
| Q96IU4 | ABHD14B | Alpha/beta hydrolase domain-containing protein 14B (Abhydrolase domain-containing protein 14B) (EC 3.-.-.-) (CCG1-interacting factor B)                                                              | 13 | 4  | 2  | 3  | 3  | 5  | 0 | 3 | 1 | 0 | -2.4 | 95% (0.042)   |
| O14657 | TOR1B   | Torsin-1B (Torsin family 1 member B)                                                                                                                                                                 | 13 | 4  | 0  | 2  | 2  | 9  | 0 | 1 | 0 | 3 | -2.4 | 95% (0.042)   |

|        |        |                                                                                                                                                                                                                                                                                                                                                       |     |    |    |    |    |    |   |   |    |    |      |                 |
|--------|--------|-------------------------------------------------------------------------------------------------------------------------------------------------------------------------------------------------------------------------------------------------------------------------------------------------------------------------------------------------------|-----|----|----|----|----|----|---|---|----|----|------|-----------------|
| Q96CW1 | AP2M1  | AP-2 complex subunit mu (AP-2 mu chain) (Adapter-related protein complex 2 subunit mu) (Adaptin-mu2) (Adaptor protein complex AP-2 subunit mu) (Clathrin assembly protein complex 2 mu medium chain) (Clathrin coat assembly protein AP50) (Clathrin coat-associated protein AP50) (HA2 50 kDa subunit) (Plasma membrane adaptor AP-2 50 kDa protein) | 32  | 11 | 10 | 9  | 5  | 9  | 3 | 1 | 3  | 4  | -2.4 | 95% (0.0032)    |
| O95294 | RASAL1 | RasGAP-activating-like protein 1                                                                                                                                                                                                                                                                                                                      | 19  | 6  | 19 | 0  | 0  | 0  | 0 | 0 | 0  | 6  | -2.5 | 95% (0.016)     |
| B4DGM9 | TOR1A  | Torsin family 1, member A (Torsin A), isoform CRA_a (cDNA FLJ56343, highly similar to Torsin A)                                                                                                                                                                                                                                                       | 33  | 11 | 8  | 8  | 4  | 14 | 0 | 4 | 3  | 4  | -2.5 | 95% (0.0022)    |
| P21589 | NTSE   | 5'-nucleotidase (5'-NT) (EC 3.1.3.5) (Ecto-5'-nucleotidase) (CD antigen CD73)                                                                                                                                                                                                                                                                         | 22  | 7  | 7  | 9  | 7  | 0  | 0 | 3 | 2  | 2  | -2.5 | 95% (0.0098)    |
| P05109 | S100A8 | Protein S100-A8 (Calgranulin-A) (Calprotectin L1L subunit) (Cystic fibrosis antigen) (CFAG) (Leukocyte L1 complex light chain) (Migration inhibitory factor-related protein 8) (MRP-8) (p8) (S100 calcium-binding protein A8) (Urinary stone protein band A) [Cleaved into: Protein S100-A8, N-terminally processed]                                  | 53  | 18 | 1  | 22 | 20 | 10 | 0 | 5 | 5  | 8  | -2.5 | 95% (0.00014)   |
| Q14573 | ITPR3  | Inositol 1,4,5-trisphosphate receptor type 3 (IP3 receptor isoform 3) (IP3R 3) (InsP3R3) (Type 3 inositol 1,4,5-trisphosphate receptor) (Type 3 InsP3 receptor)                                                                                                                                                                                       | 138 | 48 | 85 | 21 | 29 | 5  | 6 | 0 | 32 | 10 | -2.5 | 95% (< 0.00010) |
| Q9Y2A7 | NCKAP1 | Nck-associated protein 1 (NAP 1) (Membrane-associated protein HEM-2) (p125Nap1)                                                                                                                                                                                                                                                                       | 28  | 9  | 11 | 5  | 6  | 5  | 2 | 3 | 1  | 2  | -2.5 | 95% (0.0038)    |
| P39687 | ANP32A | Acidic leucine-rich nuclear phosphoprotein 32 family member A (Acidic nuclear phosphoprotein                                                                                                                                                                                                                                                          | 11  | 3  | 1  | 3  | 1  | 7  | 1 | 0 | 2  | 0  | -2.6 | 95% (0.046)     |

|        |        |                                                                                                                                                                                                                      |    |    |    |    |   |    |   |   |   |   |      |               |
|--------|--------|----------------------------------------------------------------------------------------------------------------------------------------------------------------------------------------------------------------------|----|----|----|----|---|----|---|---|---|---|------|---------------|
|        |        | pp32) (Leucine-rich acidic nuclear protein) (LANP) (Mapmodulin)<br>(Potent heat-stable protein phosphatase 2A inhibitor I1PP2A)<br>(Putative HLA-DR-associated protein I) (PHAPI)                                    |    |    |    |    |   |    |   |   |   |   |      |               |
| Q96BM9 | ARL8A  | ADP-ribosylation factor-like protein 8A (ADP-ribosylation factor-like protein 10B) (Novel small G protein indispensable for equal chromosome segregation 2)                                                          | 40 | 13 | 14 | 10 | 8 | 8  | 0 | 4 | 3 | 6 | -2.6 | 95% (0.00063) |
| Q9UKV8 | AGO2   | Protein argonaute-2 (Argonaute2) (hAgo2) (EC 3.1.26.n2) (Argonaute RISC catalytic component 2) (Eukaryotic translation initiation factor 2C 2) (eIF-2C 2) (eIF2C 2) (PAZ/Piwi domain protein) (PPD) (Protein slicer) | 14 | 4  | 0  | 6  | 8 | 1  | 1 | 0 | 2 | 1 | -2.6 | 95% (0.028)   |
| Q9H4M9 | EHD1   | EH domain-containing protein 1 (PAST homolog 1) (hPAST1) (Testilin)                                                                                                                                                  | 14 | 4  | 5  | 4  | 1 | 4  | 0 | 2 | 2 | 0 | -2.6 | 95% (0.028)   |
| Q13868 | EXOSC2 | Exosome complex component RRP4 (Exosome component 2) (Ribosomal RNA-processing protein 4)                                                                                                                            | 14 | 4  | 0  | 4  | 4 | 6  | 1 | 1 | 2 | 0 | -2.6 | 95% (0.028)   |
| P00390 | GSR    | Glutathione reductase, mitochondrial (GR) (GRase) (EC 1.8.1.7)                                                                                                                                                       | 17 | 5  | 2  | 7  | 7 | 1  | 1 | 0 | 2 | 2 | -2.6 | 95% (0.017)   |
| Q0PNF2 |        | FEX1                                                                                                                                                                                                                 | 17 | 5  | 0  | 7  | 9 | 0  | 0 | 0 | 1 | 4 | -2.6 | 95% (0.017)   |
| O15400 | STX7   | Syntaxin-7                                                                                                                                                                                                           | 20 | 6  | 9  | 4  | 4 | 3  | 0 | 0 | 2 | 4 | -2.6 | 95% (0.011)   |
| P37235 | HPCAL1 | Hippocalcin-like protein 1 (Calcium-binding protein BDR-1) (HLP2) (Visinin-like protein 3) (VILIP-3)                                                                                                                 | 23 | 7  | 5  | 7  | 9 | 2  | 0 | 1 | 3 | 3 | -2.6 | 95% (0.0066)  |
| P09429 | HMGB1  | High mobility group protein B1 (High mobility group protein 1) (HMG-1)                                                                                                                                               | 29 | 9  | 8  | 5  | 5 | 11 | 2 | 1 | 1 | 5 | -2.6 | 95% (0.0026)  |
| P17301 | ITGA2  | Integrin alpha-2 (CD49 antigen-like family member B) (Collagen receptor) (Platelet membrane                                                                                                                          | 24 | 7  | 10 | 7  | 7 | 0  | 0 | 0 | 0 | 7 | -2.7 | 95% (0.0045)  |

|        |         |                                                                                                                                                                                                                                                                                                                                |    |   |   |   |   |   |   |   |   |   |      |              |
|--------|---------|--------------------------------------------------------------------------------------------------------------------------------------------------------------------------------------------------------------------------------------------------------------------------------------------------------------------------------|----|---|---|---|---|---|---|---|---|---|------|--------------|
|        |         | glycoprotein Ia) (GPIa) (VLA-2 subunit alpha) (CD antigen CD49b)                                                                                                                                                                                                                                                               |    |   |   |   |   |   |   |   |   |   |      |              |
| Q9UQB8 | BAIAP2  | Brain-specific angiogenesis inhibitor 1-associated protein 2 (BAI-associated protein 2) (BAI1-associated protein 2) (Protein BAP2) (Fas ligand-associated factor 3) (FLAF3) (Insulin receptor substrate p53/p58) (IRS-58) (IRSp53/58) (Insulin receptor substrate protein of 53 kDa) (IRSp53) (Insulin receptor substrate p53) | 21 | 6 | 8 | 4 | 4 | 5 | 1 | 0 | 3 | 2 | -2.7 | 95% (0.0071) |
| Q9HIE5 | TMX4    | Thioredoxin-related transmembrane protein 4 (Thioredoxin domain-containing protein 13)                                                                                                                                                                                                                                         | 21 | 6 | 8 | 3 | 5 | 5 | 0 | 1 | 2 | 3 | -2.7 | 95% (0.0071) |
| Q9BUP0 | EFHD1   | EF-hand domain-containing protein D1 (EF-hand domain-containing protein 1) (Swiprosin-2)                                                                                                                                                                                                                                       | 15 | 4 | 0 | 6 | 7 | 2 | 0 | 2 | 1 | 1 | -2.8 | 95% (0.018)  |
| J3QKR5 | CDK11B  | Cyclin-dependent kinase 11B                                                                                                                                                                                                                                                                                                    | 12 | 3 | 0 | 3 | 4 | 5 | 1 | 0 | 1 | 1 | -2.8 | 95% (0.030)  |
| P36915 | GNL1    | Guanine nucleotide-binding protein-like 1 (GTP-binding protein HSR1)                                                                                                                                                                                                                                                           | 12 | 3 | 0 | 1 | 2 | 9 | 1 | 1 | 1 | 0 | -2.8 | 95% (0.030)  |
| O60664 | PLIN3   | Perilipin-3 (47 kDa mannose 6-phosphate receptor-binding protein) (47 kDa MPR-binding protein) (Cargo selection protein TIP47) (Mannose-6-phosphate receptor-binding protein 1) (Placental protein 17) (PP17)                                                                                                                  | 12 | 3 | 8 | 1 | 1 | 2 | 0 | 0 | 0 | 3 | -2.8 | 95% (0.030)  |
| Q6PL18 | ATAD2   | ATPase family AAA domain-containing protein 2 (EC 3.6.1.3) (AAA nuclear coregulator cancer-associated protein) (ANCCA)                                                                                                                                                                                                         | 9  | 2 | 0 | 4 | 5 | 0 | 0 | 0 | 2 | 0 | -2.8 | 95% (0.050)  |
| Q96ER9 | CCDC51  | Coiled-coil domain-containing protein 51                                                                                                                                                                                                                                                                                       | 9  | 2 | 1 | 0 | 0 | 8 | 0 | 0 | 0 | 2 | -2.8 | 95% (0.050)  |
| Q92522 | H1FX    | Histone H1x                                                                                                                                                                                                                                                                                                                    | 9  | 2 | 0 | 2 | 3 | 4 | 0 | 0 | 0 | 2 | -2.8 | 95% (0.050)  |
| B4DG22 | RPS6KA3 | Ribosomal protein S6 kinase alpha-3 (cDNA FLJ56618, highly similar to Ribosomal protein S6 kinase alpha-3 (EC 2.7.11.1))                                                                                                                                                                                                       | 9  | 2 | 0 | 4 | 4 | 1 | 1 | 1 | 0 | 0 | -2.8 | 95% (0.050)  |

|        |         |                                                                                                                                                                                                          |     |    |    |    |    |    |    |   |    |   |      |                 |
|--------|---------|----------------------------------------------------------------------------------------------------------------------------------------------------------------------------------------------------------|-----|----|----|----|----|----|----|---|----|---|------|-----------------|
| Q86WV6 | TMEM173 | Stimulator of interferon genes protein (hSTING) (Endoplasmic reticulum interferon stimulator) (ERIS) (Mediator of IRF3 activation) (hMITA) (Transmembrane protein 173)                                   | 25  | 7  | 8  | 5  | 1  | 11 | 0  | 2 | 2  | 3 | -2.8 | 95% (0.0030)    |
| O94905 | ERLIN2  | Erlin-2 (Endoplasmic reticulum lipid raft-associated protein 2) (Stomatin-prohibitin-flotillin-HhC/K domain-containing protein 2) (SPFH domain-containing protein 2)                                     | 61  | 18 | 19 | 13 | 14 | 15 | 1  | 5 | 4  | 8 | -2.9 | 95% (< 0.00010) |
| Q3SXM5 | HSDL1   | Inactive hydroxysteroid dehydrogenase-like protein 1                                                                                                                                                     | 16  | 4  | 9  | 2  | 4  | 1  | 1  | 0 | 1  | 2 | -2.9 | 95% (0.012)     |
| Q14108 | SCARB2  | Lysosome membrane protein 2 (85 kDa lysosomal membrane sialoglycoprotein) (LGP85) (CD36 antigen-like 2) (Lysosome membrane protein II) (LIMP II) (Scavenger receptor class B member 2) (CD antigen CD36) | 26  | 7  | 9  | 7  | 6  | 4  | 0  | 1 | 4  | 3 | -3.0 | 95% (0.0020)    |
| P12109 | COL6A1  | Collagen alpha-1(VI) chain                                                                                                                                                                               | 13  | 3  | 1  | 7  | 5  | 0  | 0  | 0 | 0  | 3 | -3.0 | 95% (0.019)     |
| H3BN55 | RAB27A  | Ras-related protein Rab-27A (Fragment)                                                                                                                                                                   | 13  | 3  | 10 | 0  | 2  | 1  | 0  | 0 | 2  | 1 | -3.0 | 95% (0.019)     |
| P58107 | EPPK1   | Epiplakin (450 kDa epidermal antigen)                                                                                                                                                                    | 134 | 39 | 53 | 21 | 31 | 31 | 22 | 3 | 12 | 2 | -3.0 | 95% (< 0.00010) |
| Q9Y276 | BCS1L   | Mitochondrial chaperone BCS1 (h-BCS1) (BCS1-like protein)                                                                                                                                                | 10  | 2  | 3  | 3  | 2  | 2  | 0  | 2 | 0  | 0 | -3.1 | 95% (0.031)     |
| B7ZKL3 | EPS8L2  | EPS8L2 protein (Epidermal growth factor receptor kinase substrate 8-like protein 2)                                                                                                                      | 10  | 2  | 6  | 1  | 2  | 1  | 2  | 0 | 0  | 0 | -3.1 | 95% (0.031)     |
| B4DKK2 | SRI     | Sorcin (cDNA FLJ60640, highly similar to Sorcin)                                                                                                                                                         | 10  | 2  | 3  | 3  | 1  | 3  | 0  | 2 | 0  | 0 | -3.1 | 95% (0.031)     |
| P12532 | CKMT1A  | Creatine kinase U-type, mitochondrial (EC 2.7.3.2) (Acidic-type mitochondrial creatine kinase) (Mia-CK) (Ubiquitous mitochondrial creatine kinase) (U-MiCK)                                              | 31  | 8  | 13 | 5  | 3  | 11 | 2  | 0 | 6  | 0 | -3.1 | 95% (0.00055)   |



|        |         |                                                                                                                                                                                         |    |    |    |    |    |    |   |   |   |   |      |                 |
|--------|---------|-----------------------------------------------------------------------------------------------------------------------------------------------------------------------------------------|----|----|----|----|----|----|---|---|---|---|------|-----------------|
| O75911 | DHRS3   | Short-chain dehydrogenase/reductase 3 (EC 1.1.1.300) (DD83.1) (Retinal short-chain dehydrogenase/reductase 1) (retSDR1)                                                                 | 21 | 5  | 12 | 2  | 7  | 0  | 0 | 1 | 3 | 1 | -3.2 | 95% (0.0031)    |
| H3BPE1 | MACF1   | Microtubule-actin cross-linking factor 1, isoforms 1/2/3/5                                                                                                                              | 43 | 11 | 9  | 11 | 19 | 5  | 4 | 0 | 7 | 0 | -3.2 | 95% (< 0.00010) |
| Q14019 | COTL1   | Coactosin-like protein                                                                                                                                                                  | 7  | 1  | 0  | 2  | 5  | 0  | 0 | 0 | 1 | 0 | -3.3 | 95% (0.050)     |
| Q7KZN9 | COX15   | Cytochrome c oxidase assembly protein COX15 homolog                                                                                                                                     | 7  | 1  | 3  | 0  | 0  | 4  | 0 | 1 | 0 | 0 | -3.3 | 95% (0.050)     |
| P14854 | COX6B1  | Cytochrome c oxidase subunit 6B1 (Cytochrome c oxidase subunit VIb isoform 1) (COX VIb-1)                                                                                               | 7  | 1  | 1  | 1  | 2  | 3  | 1 | 0 | 0 | 0 | -3.3 | 95% (0.050)     |
| B1AUU8 | EPS15   | Epidermal growth factor receptor substrate 15                                                                                                                                           | 7  | 1  | 1  | 4  | 2  | 0  | 1 | 0 | 0 | 0 | -3.3 | 95% (0.050)     |
| Q6ZRV2 | FAM83H  | Protein FAM83H                                                                                                                                                                          | 7  | 1  | 5  | 0  | 0  | 2  | 1 | 0 | 0 | 0 | -3.3 | 95% (0.050)     |
| P26012 | ITGB8   | Integrin beta-8                                                                                                                                                                         | 7  | 1  | 3  | 1  | 1  | 2  | 0 | 0 | 1 | 0 | -3.3 | 95% (0.050)     |
| G3V2F7 | TMEM189 | HCG2044781 (Protein TMEM189-UBE2V1) (Transmembrane protein 189)                                                                                                                         | 7  | 1  | 1  | 1  | 3  | 2  | 1 | 0 | 0 | 0 | -3.3 | 95% (0.050)     |
| D3DQ48 | TMEM59  | Transmembrane protein 59, isoform CRA_e                                                                                                                                                 | 7  | 1  | 0  | 4  | 3  | 0  | 1 | 0 | 0 | 0 | -3.3 | 95% (0.050)     |
| Q9H269 | VPS16   | Vacuolar protein sorting-associated protein 16 homolog (hVPS16)                                                                                                                         | 7  | 1  | 2  | 2  | 1  | 2  | 0 | 1 | 0 | 0 | -3.3 | 95% (0.050)     |
| Q6YHK3 | CD109   | CD109 antigen (150 kDa TGF-beta-1-binding protein) (C3 and PZP-like alpha-2-macroglobulin domain-containing protein 7) (Platelet-specific Gov antigen) (p180) (r150) (CD antigen CD109) | 19 | 4  | 6  | 7  | 6  | 0  | 2 | 0 | 2 | 0 | -3.4 | 95% (0.0031)    |
| O76027 | ANXA9   | Annexin A9 (Annexin XXXI) (Annexin-31) (Annexin-9) (Pemphaxin)                                                                                                                          | 23 | 5  | 13 | 0  | 1  | 10 | 5 | 0 | 0 | 0 | -3.5 | 95% (0.0013)    |
| P55011 | SLC12A2 | Solute carrier family 12 member 2 (Basolateral Na-K-Cl symporter) (Bumetanide-sensitive sodium-(potassium)-chloride cotransporter 1)                                                    | 31 | 7  | 1  | 14 | 17 | 0  | 5 | 0 | 1 | 1 | -3.5 | 95% (0.00023)   |
| P27695 | APEX1   | DNA-(apurinic or apyrimidinic site) lyase (EC 3.1.-.-) (EC 4.2.99.18)                                                                                                                   | 16 | 3  | 0  | 1  | 1  | 14 | 1 | 1 | 1 | 0 | -3.6 | 95% (0.0047)    |

|        |               |                                                                                                                                                                                                |    |   |    |   |   |    |   |   |   |   |      |              |
|--------|---------------|------------------------------------------------------------------------------------------------------------------------------------------------------------------------------------------------|----|---|----|---|---|----|---|---|---|---|------|--------------|
|        |               | (APEX nuclease) (APEN)<br>(Apurinic-apyrimidinic endonuclease 1) (AP endonuclease 1) (APE-1) (REF-1) (Redox factor-1) [Cleaved into: DNA-(apurinic or apyrimidinic site) lyase, mitochondrial] |    |   |    |   |   |    |   |   |   |   |      |              |
| A4D2Q0 | UNC84A        | SUN domain-containing protein 1 (Unc-84 homolog A <i>C. elegans</i> )                                                                                                                          | 16 | 3 | 13 | 2 | 0 | 2  | 1 | 0 | 0 | 2 | -3.6 | 95% (0.0047) |
| Q7L5L3 | GDPD3         | Glycerophosphodiester phosphodiesterase domain-containing protein 3 (EC 3.1.-.-)                                                                                                               | 12 | 2 | 1  | 1 | 0 | 10 | 1 | 0 | 1 | 0 | -3.6 | 95% (0.012)  |
| Q9H3Z4 | DNAJC5        | DnaJ homolog subfamily C member 5 (Cysteine string protein) (CSP)                                                                                                                              | 8  | 1 | 2  | 2 | 2 | 2  | 0 | 0 | 0 | 1 | -3.7 | 95% (0.029)  |
| H0Y6T6 | NRM           | Nurim (Fragment)                                                                                                                                                                               | 8  | 1 | 2  | 0 | 0 | 6  | 0 | 0 | 0 | 1 | -3.7 | 95% (0.029)  |
| F8J390 | PKP3          | Plakophilin 3b (Fragment)                                                                                                                                                                      | 8  | 1 | 4  | 0 | 2 | 2  | 1 | 0 | 0 | 0 | -3.7 | 95% (0.029)  |
| P49903 | SEPHS1        | Selenide, water dikinase 1 (EC 2.7.9.3) (Selenium donor protein 1) (Selenophosphate synthase 1)                                                                                                | 8  | 1 | 0  | 3 | 1 | 4  | 1 | 0 | 0 | 0 | -3.7 | 95% (0.029)  |
| P37837 | TALDO1        | Transaldolase (EC 2.2.1.2)                                                                                                                                                                     | 21 | 4 | 2  | 2 | 9 | 8  | 1 | 1 | 1 | 1 | -3.8 | 95% (0.0012) |
| Q5HYL6 | DKFZp686E1899 | Putative uncharacterized protein DKFZp686E1899                                                                                                                                                 | 13 | 2 | 1  | 1 | 7 | 4  | 0 | 0 | 2 | 0 | -3.9 | 95% (0.0070) |
| Q59FB9 |               | Toll interacting protein variant (Fragment)                                                                                                                                                    | 13 | 2 | 6  | 4 | 2 | 2  | 0 | 0 | 1 | 1 | -3.9 | 95% (0.0070) |
| F8VXY3 | OAS1          | 2'-5'-oligoadenylate synthase 1                                                                                                                                                                | 18 | 3 | 0  | 0 | 0 | 18 | 0 | 3 | 0 | 0 | -4.0 | 95% (0.0018) |
| E5KSE7 |               | Mitochondrial short-chain specific acyl-CoA dehydrogenase                                                                                                                                      | 18 | 3 | 5  | 5 | 3 | 5  | 0 | 1 | 0 | 1 | -4.0 | 95% (0.0018) |
| P33897 | ABCD1         | ATP-binding cassette sub-family D member 1 (Adrenoleukodystrophy protein) (ALDP)                                                                                                               | 9  | 1 | 4  | 1 | 0 | 4  | 0 | 0 | 1 | 0 | -4.1 | 95% (0.017)  |
| Q9NTX5 | ECHDC1        | Ethylmalonyl-CoA decarboxylase (EC 4.1.1.94) (Enoyl-CoA hydratase domain-containing protein 1) (Methylmalonyl-CoA decarboxylase) (MMCD) (EC 4.1.1.41)                                          | 9  | 1 | 3  | 2 | 1 | 3  | 0 | 0 | 1 | 0 | -4.1 | 95% (0.017)  |
| O43920 | NDUFS5        | NADH dehydrogenase [ubiquinone] iron-sulfur protein 5 (Complex I-15 kDa) (CI-15 kDa) (NADH-                                                                                                    | 9  | 1 | 3  | 2 | 2 | 2  | 0 | 0 | 1 | 0 | -4.1 | 95% (0.017)  |

|        |        |                                                                                                                                                                                                                   |      |     |     |     |     |     |    |    |     |    |      |                 |
|--------|--------|-------------------------------------------------------------------------------------------------------------------------------------------------------------------------------------------------------------------|------|-----|-----|-----|-----|-----|----|----|-----|----|------|-----------------|
|        |        | ubiquinone oxidoreductase 15 kDa subunit)                                                                                                                                                                         |      |     |     |     |     |     |    |    |     |    |      |                 |
| Q00796 | SORD   | Sorbitol dehydrogenase (EC 1.1.1.14) (L-iditol 2-dehydrogenase)                                                                                                                                                   | 9    | 1   | 0   | 0   | 0   | 9   | 0  | 0  | 1   | 0  | -4.1 | 95% (0.017)     |
| Q15149 | PLEC   | Plectin (PCN) (PLTN) (Hemidesmosomal protein 1) (HD1) (Plectin-1)                                                                                                                                                 | 1115 | 246 | 418 | 276 | 278 | 146 | 34 | 22 | 108 | 83 | -4.1 | 95% (< 0.00010) |
| P16157 | ANK1   | Ankyrin-1 (ANK-1) (Ankyrin-R) (Erythrocyte ankyrin)                                                                                                                                                               | 28   | 5   | 0   | 12  | 16  | 0   | 0  | 0  | 5   | 0  | -4.2 | 95% (0.00012)   |
| Q99828 | CIB1   | Calcium and integrin-binding protein 1 (CIB) (Calcium- and integrin-binding protein) (CIBP) (Calmyrin) (DNA-PKcs-interacting protein) (Kinase-interacting protein) (KIP) (SNK-interacting protein 2-28) (SIP2-28) | 14   | 2   | 4   | 2   | 0   | 8   | 0  | 0  | 0   | 2  | -4.2 | 95% (0.0042)    |
| P05187 | ALPP   | Alkaline phosphatase, placental type (EC 3.1.3.1) (Alkaline phosphatase Regan isozyme) (Placental alkaline phosphatase 1) (PLAP-1)                                                                                | 24   | 4   | 14  | 5   | 5   | 0   | 0  | 0  | 0   | 4  | -4.3 | 95% (0.00028)   |
| O00194 | RAB27B | Ras-related protein Rab-27B (C25KG)                                                                                                                                                                               | 10   | 1   | 7   | 1   | 2   | 0   | 0  | 0  | 1   | 0  | -4.5 | 95% (0.0098)    |
| P05164 | MPO    | Myeloperoxidase (MPO) (EC 1.11.2.2) [Cleaved into: Myeloperoxidase; 89 kDa myeloperoxidase; 84 kDa myeloperoxidase; Myeloperoxidase light chain; Myeloperoxidase heavy chain]                                     | 25   | 4   | 12  | 0   | 0   | 13  | 0  | 1  | 3   | 0  | -4.5 | 95% (0.00017)   |
| B2RMN7 | SPTB   | Spectrin, beta, erythrocytic                                                                                                                                                                                      | 16   | 2   | 0   | 6   | 10  | 0   | 1  | 0  | 0   | 0  | -4.7 | 95% (0.0015)    |
| Q8TE68 | EPS8L1 | Epidermal growth factor receptor kinase substrate 8-like protein 1 (EPS8-like protein 1) (Epidermal growth factor receptor pathway substrate 8-related protein 1) (EPS8-related protein 1)                        | 11   | 1   | 11  | 0   | 0   | 1   | 0  | 0  | 0   | 2  | -4.9 | 95% (0.0056)    |
| P08582 | MF12   | Melanotransferrin (Melanoma-associated antigen p97) (CD antigen CD228)                                                                                                                                            | 11   | 1   | 6   | 3   | 2   | 0   | 0  | 0  | 1   | 0  | -4.9 | 95% (0.0056)    |

|        |       |                                                                                                                                                                                                                                                                                                                                         |     |    |    |    |    |    |    |   |   |   |       |                    |
|--------|-------|-----------------------------------------------------------------------------------------------------------------------------------------------------------------------------------------------------------------------------------------------------------------------------------------------------------------------------------------|-----|----|----|----|----|----|----|---|---|---|-------|--------------------|
| P43155 | CRAT  | Carnitine O-acetyltransferase<br>(Carnitine acetylase) (EC 2.3.1.7)<br>(Carnitine acetyltransferase) (CAT)<br>(CrAT)                                                                                                                                                                                                                    | 11  | 1  | 1  | 1  | 5  | 4  | 0  | 1 | 0 | 0 | -4.9  | 95% (0.0056)       |
| A8K8G0 | HDGF  | Hepato-ma-derived growth factor<br>(cDNA FLJ75113)                                                                                                                                                                                                                                                                                      | 29  | 4  | 4  | 6  | 8  | 11 | 0  | 2 | 0 | 2 | -5.1  | 95% (<<br>0.00010) |
| Q13753 | LAMC2 | Laminin subunit gamma-2 (Cell-scattering factor 140 kDa subunit)<br>(CSF 140 kDa subunit) (Epiligrin subunit gamma) (Kalinin subunit gamma) (Kalinin/nicein/epiligrin 100 kDa subunit) (Ladsin 140 kDa subunit) (Laminin B2i chain)<br>(Laminin-5 subunit gamma) (Large adhesive scatter factor 140 kDa subunit) (Nicein subunit gamma) | 30  | 4  | 4  | 12 | 14 | 0  | 0  | 0 | 0 | 3 | -5.3  | 95% (<<br>0.00010) |
| P26583 | HMGB2 | High mobility group protein B2<br>(High mobility group protein 2)<br>(HMG-2)                                                                                                                                                                                                                                                            | 13  | 1  | 0  | 1  | 3  | 7  | 1  | 0 | 0 | 0 | -5.7  | 95% (0.0018)       |
| P09913 | IFIT2 | Interferon-induced protein with tetra-ricopeptide repeats 2 (IFIT-2)<br>(ISG-54 K) (Interferon-induced 54 kDa protein) (IFI-54K) (P54)                                                                                                                                                                                                  | 13  | 1  | 0  | 0  | 0  | 13 | 0  | 1 | 0 | 0 | -5.7  | 95% (0.0018)       |
| K7EKI8 | PPL   | Periplakin                                                                                                                                                                                                                                                                                                                              | 187 | 25 | 98 | 25 | 18 | 42 | 11 | 0 | 7 | 7 | -6.4  | 95% (<<br>0.00010) |
| B4DKB2 | ECE1  | Endothelin-converting enzyme 1<br>(cDNA FLJ59212, highly similar to Endothelin-converting enzyme 1 (EC 3.4.24.71))                                                                                                                                                                                                                      | 38  | 4  | 11 | 13 | 15 | 0  | 3  | 0 | 1 | 0 | -6.7  | 95% (<<br>0.00010) |
| Q16647 | PTGIS | Prostacyclin synthase (EC 5.3.99.4)<br>(Prostaglandin I2 synthase)                                                                                                                                                                                                                                                                      | 40  | 3  | 35 | 0  | 0  | 5  | 0  | 0 | 0 | 3 | -8.7  | 95% (<<br>0.00010) |
| B7Z416 | DHRS9 | Dehydrogenase/reductase SDR family member 9 (cDNA FLJ55219, highly similar to Dehydrogenase/reductase SDR family member 9 (EC 1.1.-.-))                                                                                                                                                                                                 | 46  | 2  | 18 | 18 | 18 | 18 | 0  | 0 | 0 | 2 | -13.0 | 95% (<<br>0.00010) |

<sup>A</sup>Obtained from UniProt (<http://www.uniprot.org/>) databases

<sup>C</sup>Spectral counts (SpC) in CN datasets (combined)

<sup>D</sup>Spectral counts (SpC) in CR datasets (combined)

<sup>E</sup>Spectral count ratio (Rsc) between CR (combined) and CN (combined)

<sup>F</sup>Statistical significance (p-value) (Fisher's Exact Test)
